# Supplementary material for: A unified platform for RNA-seq analysis in non-model species
Source: Research Square preprint supplement (doi:10.21203/rs.3.rs-2187066/v1), 2022-11-08
Supplement: Supplementary file 1 [file 84663fdc01a183beeaf60c7c.xlsx]

## Sheet: DEA-POS-K
EntrezID	logFC	logCPM	LR	PValue	adj.P.Val	Symbols	Name
121874308	-5.8064	5.9298	152.51	4.904e-35	8.8002e-31	LOC121874308	sodium-dependent nutrient amino acid transporter 1-like
121872643	-5.6952	3.7667	97.668	4.9483e-23	4.4399e-19	LOC121872643	serine/threonine-protein kinase meng-po-like
121879926	-3.7036	3.5415	95.579	1.4209e-22	8.4993e-19	LOC121879926	uncharacterized LOC121879926
121874996	-2.1377	4.3893	93.324	4.44e-22	1.9919e-18	LOC121874996	uncharacterized LOC121874996
121878881	3.3808	6.281	92.521	6.6607e-22	2.3905e-18	LOC121878881	AN1-type zinc finger protein 2A-like
121876286	-3.5358	2.8121	90.427	1.9196e-21	5.7413e-18	LOC121876286	baculoviral IAP repeat-containing protein 7-like
121873294	-7.5561	2.7123	81.386	1.8566e-19	4.7597e-16	LOC121873294	chitotriosidase-1-like
121865931	-6.3793	0.49529	76.756	1.9342e-18	4.3386e-15	LOC121865931	uncharacterized LOC121865931
121855071	-3.9566	6.6883	76.313	2.4204e-18	4.826e-15	LOC121855071	uncharacterized LOC121855071
121867443	-6.2453	0.80896	72.148	1.997e-17	3.5836e-14	LOC121867443	uncharacterized LOC121867443
121855754	5.1336	4.216	68.368	1.3565e-16	2.213e-13	LOC121855754	heat shock 70 kDa protein 1-like
121879929	-3.4773	3.6054	59.928	9.8412e-15	1.4717e-11	LOC121879929	uncharacterized LOC121879929
121875162	-5.9499	4.0059	59.554	1.1898e-14	1.6424e-11	LOC121875162	uncharacterized LOC121875162
121867548	-2.5918	1.425	58.25	2.3089e-14	2.9595e-11	LOC121867548	uncharacterized LOC121867548
121878160	-1.9091	4.9251	57.706	3.0439e-14	3.6416e-11	LOC121878160	sodium-coupled monocarboxylate transporter 1-like
121862377	-1.5827	5.6083	57.512	3.3593e-14	3.7677e-11	LOC121862377	inositol-trisphosphate 3-kinase homolog, transcript variant X2
121878438	-3.3574	4.6708	56.97	4.4251e-14	4.6711e-11	LOC121878438	uncharacterized LOC121878438
121875557	-1.8716	4.2522	56.125	6.802e-14	6.7812e-11	LOC121875557	uncharacterized LOC121875557, transcript variant X1
121861358	-1.976	9.2476	55.499	9.3517e-14	8.8324e-11	LOC121861358	alpha,alpha-trehalose-phosphate synthase [UDP-forming]-like
121872646	-6.2735	1.5392	55.354	1.0067e-13	9.033e-11	LOC121872646	endoglucanase E-4-like
121865164	-3.088	3.6059	54.536	1.5259e-13	1.304e-10	LOC121865164	endoglucanase E-4-like
121872645	-3.9799	3.3085	53.49	2.5992e-13	2.1201e-10	LOC121872645	serine/threonine-protein kinase SBK1-like
121870958	-2.2901	6.8871	52.349	4.6473e-13	3.6259e-10	LOC121870958	villin-1-like
121875316	-2.1422	3.2304	50.711	1.07e-12	7.5227e-10	LOC121875316	uncharacterized LOC121875316
121873424	-1.9875	5.49	50.665	1.0955e-12	7.5227e-10	LOC121873424	uncharacterized LOC121873424, transcript variant X2
121865104	-1.5164	8.3546	50.632	1.1142e-12	7.5227e-10	LOC121865104	uncharacterized LOC121865104
121872554	-3.315	2.3322	50.601	1.1319e-12	7.5227e-10	LOC121872554	uncharacterized LOC121872554
121878167	-1.6432	4.4028	49.956	1.5726e-12	1.0079e-09	LOC121878167	2-amino-1-hydroxyethylphosphonate dioxygenase (glycine-forming)-like, transcript variant X3
121879002	-2.4063	3.7626	49.531	1.9528e-12	1.2084e-09	LOC121879002	uncharacterized LOC121879002
121864067	-2.9857	2.6403	48.743	2.9177e-12	1.7453e-09	LOC121864067	ankyrin-3-like
121855757	4.746	5.8678	48.517	3.2738e-12	1.8951e-09	LOC121855757	heat shock 70 kDa protein-like
121872368	-1.5926	5.1929	48.434	3.4162e-12	1.9157e-09	LOC121872368	L-threonine 3-dehydrogenase-like, transcript variant X2
121876629	-2.2246	4.7068	48.285	3.6852e-12	1.9619e-09	LOC121876629	annexin A13-like
121869074	-1.7124	4.0066	48.268	3.7171e-12	1.9619e-09	LOC121869074	protein lifeguard 1-like
121879386	-2.1979	4.9207	47.816	4.6816e-12	2.4003e-09	LOC121879386	integrin alpha-PS2-like, transcript variant X1
121864545	3.6885	0.54067	47.184	6.462e-12	3.2211e-09	LOC121864545	cytochrome P450 6k1-like
121877055	-2.5574	2.6811	47.008	7.0712e-12	3.4295e-09	LOC121877055	tyrosine-protein kinase SRK2-like, transcript variant X2
121872644	-2.7531	4.6719	46.883	7.5361e-12	3.5588e-09	LOC121872644	serine/threonine-protein kinase SBK1-like, transcript variant X3
121858681	-2.9499	1.4992	46.246	1.0432e-11	4.8001e-09	LOC121858681	uncharacterized LOC121858681, transcript variant X2
121874203	-1.7167	4.6561	45.649	1.4147e-11	6.3469e-09	LOC121874203	hepatocyte nuclear factor 4-gamma-like, transcript variant X3
121858094	-1.9674	3.4729	45.423	1.5873e-11	6.9475e-09	LOC121858094	uncharacterized LOC121858094
121859112	-2.1431	4.2882	45.22	1.7609e-11	7.3497e-09	LOC121859112	protocadherin Fat 4-like, transcript variant X1
121873426	-2.305	4.7237	45.22	1.7612e-11	7.3497e-09	LOC121873426	ubiquitin carboxyl-terminal hydrolase 15-like
121860879	-1.7402	5.8311	45.081	1.891e-11	7.7122e-09	LOC121860879	delta(24)-sterol reductase-like
121875161	-6.7515	0.31175	44.919	2.0539e-11	8.0864e-09	LOC121875161	uncharacterized LOC121875161
121875164	-6.7516	0.31175	44.901	2.0728e-11	8.0864e-09	LOC121875164	uncharacterized LOC121875164
121870916	-2.9371	3.2434	44.556	2.4719e-11	9.4381e-09	LOC121870916	uncharacterized LOC121870916, transcript variant X2
121868780	-2.2845	5.5231	43.946	3.375e-11	1.2618e-08	LOC121868780	vesicle-associated membrane protein 2-like, transcript variant X2
121879224	-3.2597	4.6367	43.269	4.7703e-11	1.747e-08	LOC121879224	uncharacterized LOC121879224
121862852	-2.4091	5.5546	42.642	6.573e-11	2.3591e-08	LOC121862852	glucose-6-phosphatase catalytic subunit 1-like, transcript variant X1
121878845	-2.0034	3.7581	42.283	7.8967e-11	2.7785e-08	LOC121878845	uncharacterized LOC121878845
121869965	-2.5486	6.5611	42.051	8.8937e-11	3.0692e-08	LOC121869965	uncharacterized LOC121869965, transcript variant X1
121860424	-2.1342	2.8123	41.843	9.889e-11	3.3483e-08	LOC121860424	probable muscarinic acetylcholine receptor gar-1, transcript variant X4
121867470	-2.4905	1.1194	41.41	1.2343e-10	4.045e-08	LOC121867470	ankyrin-3-like, transcript variant X1
121871363	-5.0944	-0.84852	41.401	1.2398e-10	4.045e-08	LOC121871363	uncharacterized LOC121871363
121860222	-2.7571	1.383	41.238	1.3476e-10	4.3183e-08	LOC121860222	uncharacterized LOC121860222
121870643	-2.0143	7.639	41.036	1.4945e-10	4.705e-08	LOC121870643	actin-3-like
121875163	-3.9023	3.7952	40.909	1.5948e-10	4.9343e-08	LOC121875163	whey acidic protein-like
121863871	-1.6169	5.4552	40.865	1.6308e-10	4.9602e-08	LOC121863871	CCAAT/enhancer-binding protein-like
121877623	-2.4064	6.8916	40.435	2.0329e-10	5.9804e-08	LOC121877623	uncharacterized LOC121877623, transcript variant X2
121853588	-1.8358	5.1698	40.26	2.2237e-10	6.4362e-08	LOC121853588	GATA-binding factor 5-B-like, transcript variant X5
121870618	-1.6881	2.865	39.432	3.3969e-10	9.3781e-08	LOC121870618	uncharacterized LOC121870618, transcript variant X1
121879301	-2.3655	2.9744	39.19	3.8444e-10	1.0453e-07	LOC121879301	luciferin 4-monooxygenase-like
121854779	-2.1183	4.0567	39.091	4.046e-10	1.0837e-07	LOC121854779	calmodulin-like
121872279	-1.8392	5.9385	38.801	4.6918e-10	1.2381e-07	LOC121872279	short-chain dehydrogenase/reductase family 16C member 6-like, transcript variant X1
121857017	-2.8943	4.1049	38.651	5.0669e-10	1.3178e-07	LOC121857017	cholinesterase 1-like
121861620	-1.5016	6.3617	38.126	6.6318e-10	1.6741e-07	LOC121861620	ets DNA-binding protein pokkuri-like, transcript variant X1
121879348	-2.1956	1.879	38.123	6.6415e-10	1.6741e-07	LOC121879348	uncharacterized LOC121879348
121865512	-1.5016	5.1197	38.101	6.7168e-10	1.6741e-07	LOC121865512	solute carrier family 43 member 3-like, transcript variant X2
121879450	-2.5471	2.6407	38.016	7.0184e-10	1.702e-07	LOC121879450	caspase-2-like
121861308	-2.1744	6.8463	37.94	7.2962e-10	1.7457e-07	LOC121861308	failed axon connections homolog, transcript variant X1
121877604	-2.1002	5.9427	37.85	7.6397e-10	1.8039e-07	LOC121877604	phospholipid phosphatase-related protein type 5-like
121859404	1.8072	5.4381	37.767	7.9709e-10	1.8141e-07	LOC121859404	uncharacterized LOC121859404
121873541	-2.2688	5.0341	37.764	7.9861e-10	1.8141e-07	LOC121873541	uncharacterized LOC121873541
121863063	-2.2312	2.7039	37.592	8.7191e-10	1.9325e-07	LOC121863063	zinc metalloproteinase nas-14-like
121873672	-1.7169	4.7739	37.591	8.7231e-10	1.9325e-07	LOC121873672	UDP-glycosyltransferase UGT5-like
121862540	-2.1785	5.0838	37.54	8.9539e-10	1.9595e-07	LOC121862540	uncharacterized LOC121862540, transcript variant X3
121877660	-1.6987	5.7939	37.485	9.2136e-10	1.992e-07	LOC121877660	probable low-specificity L-threonine aldolase 2
121879180	-2.2893	0.20429	37.387	9.6852e-10	2.0447e-07	LOC121879180	biotinidase-like
121864938	-4.1028	3.4625	37.286	1.0203e-09	2.129e-07	LOC121864938	glutamine synthetase-like, transcript variant X1
121858740	-1.9143	6.7315	37.219	1.056e-09	2.1691e-07	LOC121858740	short-chain dehydrogenase/reductase family 9C member 7-like
121863798	-2.7686	1.6085	37.204	1.0637e-09	2.1691e-07	LOC121863798	IST1 homolog, transcript variant X1
121859091	-2.4134	-0.046242	37.131	1.1045e-09	2.227e-07	LOC121859091	uncharacterized LOC121859091
121857085	-2.5775	2.8433	37.098	1.1233e-09	2.2299e-07	LOC121857085	failed axon connections homolog, transcript variant X2
121855124	-1.7622	4.6393	37.085	1.1308e-09	2.2299e-07	LOC121855124	uncharacterized LOC121855124, transcript variant X2
121878296	-2.3387	6.0847	37.061	1.1447e-09	2.2328e-07	LOC121878296	uncharacterized LOC121878296
121865166	-4.1478	1.1909	36.801	1.3081e-09	2.5241e-07	LOC121865166	endoglucanase E-4-like
121876085	-3.1228	1.7477	36.773	1.3269e-09	2.533e-07	LOC121876085	uncharacterized LOC121876085
121862243	-2.2194	4.1835	36.683	1.3902e-09	2.626e-07	LOC121862243	glycerol-3-phosphate acyltransferase 3-like
121876886	-2.5478	4.936	36.566	1.4755e-09	2.7581e-07	LOC121876886	glucose-6-phosphate exchanger SLC37A4-like, transcript variant X2
121858742	-1.8181	5.5706	36.411	1.5978e-09	2.9258e-07	LOC121858742	uncharacterized LOC121858742
121854642	-3.7453	1.4021	36.298	1.6935e-09	3.0156e-07	LOC121854642	cystinosin-like
121855758	4.8087	4.3219	36.294	1.6973e-09	3.0156e-07	LOC121855758	heat shock 70 kDa protein 1-like
121869223	-2.2182	4.5201	36.229	1.7547e-09	3.087e-07	LOC121869223	uncharacterized LOC121869223
121866193	-3.4427	1.195	36.156	1.8214e-09	3.1733e-07	LOC121866193	uncharacterized LOC121866193
121878761	-2.3307	1.3544	35.982	1.9917e-09	3.4367e-07	LOC121878761	cytochrome P450 3A6-like, transcript variant X2
121866861	-2.5267	2.696	35.793	2.1949e-09	3.7416e-07	LOC121866861	uncharacterized LOC121866861, transcript variant X2
121862442	-1.9926	4.6615	35.779	2.2102e-09	3.7416e-07	LOC121862442	apolipophorins-like
121870027	-2.5114	2.5443	35.461	2.6015e-09	4.3226e-07	LOC121870027	uncharacterized LOC121870027
121868362	-1.5009	5.5841	35.431	2.6424e-09	4.3502e-07	LOC121868362	organic cation transporter protein-like, transcript variant X1
121873310	-1.8233	2.9695	34.935	3.4087e-09	5.5232e-07	LOC121873310	uncharacterized LOC121873310
121868024	-2.4395	5.6187	34.931	3.4164e-09	5.5232e-07	LOC121868024	pancreatic lipase-related protein 2-like
121857494	-3.3076	3.8298	34.879	3.509e-09	5.6222e-07	LOC121857494	xanthine dehydrogenase/oxidase-like
121869781	-2.2065	5.4613	34.742	3.7651e-09	5.9267e-07	LOC121869781	aldo-keto reductase family 1 member A1-like, transcript variant X2
121860191	-1.5699	7.2607	34.149	5.1055e-09	7.9668e-07	LOC121860191	probable caffeoyl-CoA O-methyltransferase 2
121860054	-1.7456	4.0352	34.041	5.3956e-09	8.3469e-07	LOC121860054	solute carrier family 46 member 3-like
121872377	-2.828	3.3762	33.971	5.5933e-09	8.5788e-07	LOC121872377	uncharacterized LOC121872377, transcript variant X1
121864640	-2.0936	4.3519	33.947	5.6628e-09	8.6118e-07	LOC121864640	uncharacterized LOC121864640
121863887	-2.4518	5.0027	33.791	6.1376e-09	9.2523e-07	LOC121863887	cationic trypsin-like
121854812	-1.5966	4.6741	33.771	6.2001e-09	9.2523e-07	LOC121854812	uncharacterized LOC121854812
121879905	-1.5479	7.7558	33.759	6.2387e-09	9.2523e-07	LOC121879905	uncharacterized LOC121879905, transcript variant X1
121867744	-1.5753	4.5364	33.55	6.9464e-09	1.0134e-06	LOC121867744	juvenile hormone epoxide hydrolase 1-like, transcript variant X2
121867397	-2.5136	2.2336	33.506	7.1059e-09	1.0284e-06	LOC121867397	uncharacterized LOC121867397
121863397	-3.8621	2.3233	33.342	7.7281e-09	1.1006e-06	LOC121863397	dipeptidyl peptidase 1-like
121864184	-2.307	2.1675	33.207	8.2847e-09	1.1656e-06	LOC121864184	uncharacterized LOC121864184
121863787	-2.1882	3.5812	33.2	8.3143e-09	1.1656e-06	LOC121863787	cytochrome P450 6j1-like, transcript variant X2
121868797	-2.3345	1.4467	33.065	8.9111e-09	1.2396e-06	LOC121868797	peroxisomal acyl-coenzyme A oxidase 1-like, transcript variant X1
121869527	-2.0508	3.4413	33.036	9.0474e-09	1.2489e-06	LOC121869527	L-galactose dehydrogenase-like, transcript variant X2
121860738	-2.3084	2.5491	33.011	9.1624e-09	1.2551e-06	LOC121860738	bromodomain-containing protein 4-like, transcript variant X1
121876257	-1.924	4.3317	32.915	9.6278e-09	1.3089e-06	LOC121876257	uncharacterized LOC121876257, transcript variant X2
121867760	-1.8183	4.0139	32.888	9.7625e-09	1.3172e-06	LOC121867760	piwi-like protein Siwi, transcript variant X2
121872623	-1.9339	5.4489	32.734	1.0565e-08	1.4149e-06	LOC121872623	medium-chain acyl-CoA ligase ACSF2, mitochondrial-like, transcript variant X1
121868060	-3.3826	3.5124	32.707	1.0714e-08	1.4242e-06	LOC121868060	uncharacterized LOC121868060
121875109	-3.5948	2.7903	32.663	1.0959e-08	1.446e-06	LOC121875109	mitochondrial amidoxime-reducing component 1-like
121876562	-1.9482	5.3152	32.63	1.1148e-08	1.4602e-06	LOC121876562	methyltransferase-like protein 7A, transcript variant X2
121853430	-2.1466	4.7832	32.588	1.1394e-08	1.4783e-06	LOC121853430	innexin inx2-like, transcript variant X1
121870720	-2.6757	2.1193	32.578	1.1451e-08	1.4783e-06	LOC121870720	uncharacterized protein PB18E9.04c-like, transcript variant X2
121854089	2.8444	-0.26754	32.549	1.1624e-08	1.4899e-06	LOC121854089	probable cytochrome P450 6a18
121863447	-2.3133	0.72158	32.502	1.191e-08	1.5157e-06	LOC121863447	uncharacterized LOC121863447
121879928	-4.153	3.1765	32.486	1.2003e-08	1.5168e-06	LOC121879928	uncharacterized LOC121879928
121878490	-2.5819	9.0395	32.426	1.2379e-08	1.5535e-06	LOC121878490	serine-rich adhesin for platelets-like
121875182	-2.7363	3.4038	32.381	1.2674e-08	1.5685e-06	LOC121875182	ubiquitin-conjugating enzyme E2 D3-like
121859430	-2.3908	4.6821	32.267	1.3436e-08	1.6474e-06	LOC121859430	uncharacterized LOC121859430
121872706	-1.9226	5.1299	32.259	1.3495e-08	1.6474e-06	LOC121872706	diacylglycerol O-acyltransferase 1-like, transcript variant X1
121860426	-2.1761	1.5413	32.192	1.3969e-08	1.6937e-06	LOC121860426	uncharacterized LOC121860426
121862140	-3.504	2.2263	32.153	1.4249e-08	1.7161e-06	LOC121862140	fibroleukin-like, transcript variant X1
121868266	-2.6039	3.4821	31.681	1.8171e-08	2.1595e-06	LOC121868266	uncharacterized LOC121868266
121859749	-1.7416	3.4091	31.578	1.9163e-08	2.2624e-06	LOC121859749	aspartate aminotransferase-like, transcript variant X1
121869057	-2.2495	2.4465	31.549	1.9446e-08	2.2674e-06	LOC121869057	trichohyalin-like
121872714	-1.5967	2.8277	31.548	1.9458e-08	2.2674e-06	LOC121872714	uncharacterized LOC121872714, transcript variant X1
121867525	-3.0588	2.2969	31.489	2.0055e-08	2.3219e-06	LOC121867525	protein zntD-like
121874527	-1.7385	2.1038	31.153	2.3845e-08	2.7255e-06	LOC121874527	homeobox protein abdominal-A homolog
121856934	-3.1938	0.06483	31.035	2.5345e-08	2.8785e-06	LOC121856934	hepatic lectin-like
121872558	-2.6125	2.9954	30.891	2.7296e-08	3.0614e-06	LOC121872558	protein Aster-C-like
121875084	-2.1287	2.2266	30.867	2.7628e-08	3.0794e-06	LOC121875084	transmembrane protein 45B-like
121871765	-2.4649	3.906	30.691	3.0252e-08	3.3305e-06	LOC121871765	retinol-binding protein pinta-like, transcript variant X2
121873714	-2.5642	3.0488	30.631	3.1202e-08	3.4141e-06	LOC121873714	uncharacterized LOC121873714
121878084	-1.5547	4.7205	30.551	3.2519e-08	3.5367e-06	LOC121878084	beta-hexosaminidase subunit alpha-like
121872971	-1.8889	5.6629	30.343	3.6195e-08	3.8893e-06	LOC121872971	uncharacterized LOC121872971
121871856	-1.637	5.5891	30.266	3.7675e-08	4.0243e-06	LOC121871856	leukocyte elastase inhibitor-like, transcript variant X2
121855578	-1.8405	2.2342	30.209	3.8782e-08	4.118e-06	LOC121855578	serine/threonine-protein kinase Pak-like
121878376	-3.7404	3.6551	30.129	4.0417e-08	4.2664e-06	LOC121878376	serine/threonine-protein kinase Sgk1-like, transcript variant X2
121863826	-2.1803	3.4874	30.01	4.2975e-08	4.5098e-06	LOC121863826	uncharacterized LOC121863826
121874359	-2.9388	3.7927	29.972	4.3836e-08	4.5671e-06	LOC121874359	acid sphingomyelinase-like phosphodiesterase 3b
121866952	-1.8301	2.0967	29.963	4.403e-08	4.5671e-06	LOC121866952	proton myo-inositol cotransporter-like
121867949	2.9929	2.4302	29.85	4.6683e-08	4.8143e-06	LOC121867949	probable serine/threonine-protein kinase samkC
121874210	-3.1118	5.267	29.712	5.0118e-08	5.0812e-06	LOC121874210	uncharacterized LOC121874210
121876336	-4.8243	-0.71224	29.679	5.0973e-08	5.1388e-06	LOC121876336	tyrosine-protein phosphatase Lar-like
121858374	-3.1139	4.4701	29.656	5.1602e-08	5.173e-06	LOC121858374	hemicentin-2-like, transcript variant X1
121858455	-2.0373	1.558	29.645	5.1889e-08	5.173e-06	LOC121858455	uncharacterized LOC121858455
121860081	-2.63	4.6414	29.438	5.7744e-08	5.6806e-06	LOC121860081	protein white-like
121872936	-2.9162	3.4599	29.431	5.7929e-08	5.6806e-06	LOC121872936	uncharacterized LOC121872936
121876865	-2.0058	2.5588	29.353	6.0335e-08	5.8525e-06	LOC121876865	proline-rich receptor-like protein kinase PERK2, transcript variant X1
121872278	-2.3183	3.3634	29.341	6.0707e-08	5.8569e-06	LOC121872278	epidermal retinol dehydrogenase 2-like, transcript variant X4
121856674	-3.2311	2.1389	29.292	6.2252e-08	5.9738e-06	LOC121856674	peroxisomal trans-2-enoyl-CoA reductase-like
121855774	-1.6825	5.847	29.193	6.5521e-08	6.221e-06	LOC121855774	low-density lipoprotein receptor-like, transcript variant X2
121873313	-2.8418	-0.16309	29.022	7.1553e-08	6.758e-06	LOC121873313	solute carrier family 35 member F6-like, transcript variant X1
121861847	-2.3613	4.6285	28.942	7.4568e-08	6.9067e-06	LOC121861847	translation initiation factor IF-2-like, transcript variant X3
121872143	-3.4719	1.5534	28.94	7.4667e-08	6.9067e-06	LOC121872143	collagen alpha-1(XII) chain-like
121868262	-2.0693	2.4077	28.921	7.5403e-08	6.939e-06	LOC121868262	uncharacterized LOC121868262
121880017	-1.5798	5.8292	28.683	8.5265e-08	7.6888e-06	LOC121880017	profilin-like
121862161	-2.5799	4.3209	28.627	8.7764e-08	7.8746e-06	LOC121862161	ileal sodium/bile acid cotransporter-like
121856452	-2.5017	6.3967	28.573	9.0212e-08	8.0357e-06	LOC121856452	UDP-glucosyltransferase 2-like, transcript variant X4
121858448	-2.4659	4.5989	28.568	9.0455e-08	8.0357e-06	LOC121858448	uncharacterized LOC121858448, transcript variant X1
121867178	-1.7393	5.265	28.527	9.2407e-08	8.1502e-06	LOC121867178	sodium/calcium exchanger regulatory protein 1-like
121876787	-2.4473	3.0625	28.509	9.3285e-08	8.1502e-06	LOC121876787	uncharacterized LOC121876787
121859976	-1.8086	3.5645	28.503	9.356e-08	8.1502e-06	LOC121859976	uncharacterized LOC121859976
121867462	-1.5376	4.4477	28.427	9.7299e-08	8.4349e-06	LOC121867462	zinc finger CCHC domain-containing protein 10-like
121868831	-3.5534	3.7625	28.402	9.8542e-08	8.5016e-06	LOC121868831	macrophage mannose receptor 1-like, transcript variant X2
121870353	-2.5934	4.8331	28.365	1.0049e-07	8.5871e-06	LOC121870353	uncharacterized LOC121870353
121866475	-2.9436	1.4687	28.355	1.0097e-07	8.5871e-06	LOC121866475	D-aspartate oxidase-like
121853869	-2.0592	1.3849	28.305	1.0365e-07	8.6973e-06	LOC121853869	uncharacterized LOC121853869
121855905	-2.4965	0.21917	28.303	1.0372e-07	8.6973e-06	LOC121855905	metalloreductase STEAP4-like, transcript variant X3
121878893	-2.4443	6.0359	28.265	1.0578e-07	8.8082e-06	LOC121878893	dimethylglycine dehydrogenase, mitochondrial-like, transcript variant X1
121854884	-2.6663	2.8689	28.261	1.0602e-07	8.8082e-06	LOC121854884	uncharacterized LOC121854884
121863859	-2.2291	3.0986	28.245	1.0687e-07	8.8377e-06	LOC121863859	uncharacterized LOC121863859
121865932	-2.42	7.1532	28.187	1.1013e-07	9.0655e-06	LOC121865932	2-aminoethylphosphonate--pyruvate transaminase-like, transcript variant X2
121875185	-1.9078	4.3724	28.078	1.1655e-07	9.5503e-06	LOC121875185	ubiquitin-conjugating enzyme E2-17 kDa-like
121874582	-2.1272	3.3224	28.044	1.1861e-07	9.6744e-06	LOC121874582	facilitated trehalose transporter Tret1-like, transcript variant X4
121879970	-2.3663	2.1396	27.963	1.2368e-07	1.0033e-05	LOC121879970	ectoine dioxygenase-like
121857404	-3.5803	3.648	27.956	1.2411e-07	1.0033e-05	LOC121857404	homeobox protein Nkx-2.3-like, transcript variant X4
121863392	-6.4287	-1.0319	27.796	1.3477e-07	1.0749e-05	LOC121863392	dipeptidyl peptidase 1-like, transcript variant X2
121863248	-2.3442	0.83789	27.729	1.3955e-07	1.108e-05	LOC121863248	perlucin-like protein
121867237	-2.8085	3.9624	27.651	1.453e-07	1.1487e-05	LOC121867237	uncharacterized LOC121867237
121879220	-3.5041	3.96	27.615	1.4801e-07	1.165e-05	LOC121879220	uncharacterized LOC121879220, transcript variant X2
121860945	-2.4902	3.2662	27.597	1.4938e-07	1.1677e-05	LOC121860945	leucine-rich repeat neuronal protein 1-like
121853177	-2.1873	3.1652	27.592	1.4977e-07	1.1677e-05	LOC121853177	uncharacterized LOC121853177, transcript variant X2
121866491	-2.4227	3.2745	27.585	1.5032e-07	1.1677e-05	LOC121866491	uncharacterized LOC121866491
121867325	-1.8609	4.2726	27.367	1.6824e-07	1.2891e-05	LOC121867325	trypsin-1-like
121880483	-2.0214	4.6625	27.361	1.6882e-07	1.2891e-05	LOC121880483	uncharacterized LOC121880483
121858534	-2.7287	2.4205	27.322	1.7228e-07	1.31e-05	LOC121858534	uncharacterized LOC121858534, transcript variant X2
121863469	-1.9495	-0.0089973	27.296	1.746e-07	1.3165e-05	LOC121863469	nicotinamide riboside kinase 2-like, transcript variant X2
121877178	-2.6878	1.8971	27.271	1.7688e-07	1.3281e-05	LOC121877178	uncharacterized LOC121877178
121873350	-2.7128	3.1777	27.199	1.8355e-07	1.3644e-05	LOC121873350	glutathione S-transferase Mu 4-like, transcript variant X1
121863815	-2.441	2.8245	27.174	1.8599e-07	1.3735e-05	LOC121863815	calcium-binding protein P-like
121869396	-2.1788	5.1083	26.964	2.0726e-07	1.507e-05	LOC121869396	uncharacterized LOC121869396
121869171	-2.4564	4.1155	26.963	2.0743e-07	1.507e-05	LOC121869171	T-box transcription factor TBX22-like
121868964	-2.7788	0.71132	26.952	2.0858e-07	1.5092e-05	LOC121868964	uncharacterized LOC121868964
121875719	-3.1295	3.861	26.892	2.151e-07	1.5502e-05	LOC121875719	inositol oxygenase-like
121869042	-1.5164	3.2509	26.832	2.219e-07	1.5857e-05	LOC121869042	uncharacterized LOC121869042, transcript variant X2
121871928	-2.4296	4.264	26.826	2.2268e-07	1.5857e-05	LOC121871928	lysoplasmalogenase-like, transcript variant X2
121866482	-1.7087	6.4067	26.8	2.2569e-07	1.5898e-05	LOC121866482	NADPH--cytochrome P450 reductase-like, transcript variant X1
121866365	-1.8677	2.2335	26.798	2.2591e-07	1.5898e-05	LOC121866365	proton-coupled folate transporter-like
121867262	-2.8724	3.6062	26.747	2.3193e-07	1.6258e-05	LOC121867262	macrophage mannose receptor 1-like, transcript variant X2
121859077	-2.3901	1.8008	26.702	2.3735e-07	1.6573e-05	LOC121859077	Friend leukemia integration 1 transcription factor-like
121874200	-2.7603	2.0286	26.694	2.3831e-07	1.6575e-05	LOC121874200	uncharacterized LOC121874200
121871783	-2.9107	5.8053	26.66	2.4259e-07	1.6744e-05	LOC121871783	bile acid-CoA:amino acid N-acyltransferase-like, transcript variant X1
121869955	-1.6003	3.2644	26.647	2.4428e-07	1.6796e-05	LOC121869955	N-acetylneuraminate lyase-like, transcript variant X2
121865837	4.1013	-0.63793	26.601	2.5005e-07	1.7127e-05	LOC121865837	kelch-like protein 2
121875183	-2.6666	4.7336	26.528	2.5981e-07	1.7727e-05	LOC121875183	ubiquitin-like modifier-activating enzyme 1
121865534	-2.1001	4.3374	26.507	2.6253e-07	1.7845e-05	LOC121865534	uncharacterized LOC121865534
121859889	-4.5213	1.553	26.419	2.748e-07	1.8539e-05	LOC121859889	indole-3-acetaldehyde oxidase-like
121862244	-2.4813	4.7842	26.327	2.8828e-07	1.9375e-05	LOC121862244	glycerol-3-phosphate acyltransferase 3-like, transcript variant X1
121879076	-2.8009	2.3816	26.311	2.9067e-07	1.9463e-05	LOC121879076	uncharacterized LOC121879076, transcript variant X1
121869747	-2.6929	3.6134	26.227	3.0359e-07	2.0252e-05	LOC121869747	tetraspanin-2A-like
121865975	-2.8711	3.2216	26.148	3.1629e-07	2.1022e-05	LOC121865975	probable cytochrome P450 301a1, mitochondrial, transcript variant X2
121879903	-2.6788	2.0719	26.131	3.1899e-07	2.1048e-05	LOC121879903	serine protease inhibitor 2.1-like
121879281	-5.1457	5.3738	26.131	3.1903e-07	2.1048e-05	LOC121879281	hemocyanin B chain-like
121854692	-2.3274	2.2315	26.074	3.2851e-07	2.1538e-05	LOC121854692	uncharacterized LOC121854692, transcript variant X1
121877365	-1.6951	2.2626	26.072	3.2886e-07	2.1538e-05	LOC121877365	epoxide hydrolase 4-like, transcript variant X1
121870548	-2.6969	-0.22979	26.015	3.3884e-07	2.2059e-05	LOC121870548	uncharacterized LOC121870548, transcript variant X1
121862301	-2.0746	1.9889	26.012	3.3928e-07	2.2059e-05	LOC121862301	uncharacterized LOC121862301
121865135	-2.7952	3.3047	25.949	3.5054e-07	2.2709e-05	LOC121865135	uncharacterized LOC121865135, transcript variant X1
121860290	-3.9519	1.8601	25.897	3.6005e-07	2.3175e-05	LOC121860290	uncharacterized LOC121860290
121856227	-2.2664	2.1478	25.896	3.6033e-07	2.3175e-05	LOC121856227	transcriptional regulator DEF1-like
121855868	-2.6807	2.2788	25.888	3.6173e-07	2.3175e-05	LOC121855868	moesin-like
121867439	-2.5618	0.57733	25.882	3.6289e-07	2.3175e-05	LOC121867439	uncharacterized LOC121867439
121870326	-2.3616	3.1722	25.859	3.6731e-07	2.3374e-05	LOC121870326	uncharacterized LOC121870326
121857265	-5.1352	-1.4245	25.774	3.8373e-07	2.4332e-05	LOC121857265	uncharacterized LOC121857265
121876847	-3.0399	2.7929	25.747	3.8932e-07	2.46e-05	LOC121876847	latrophilin-like protein LAT-2
121870282	-1.5025	3.807	25.72	3.9475e-07	2.4856e-05	LOC121870282	solute carrier family 25 member 45-like, transcript variant X1
121867478	-2.8341	2.9694	25.536	4.3425e-07	2.6964e-05	LOC121867478	uncharacterized LOC121867478
121868356	-2.2301	3.3768	25.522	4.3731e-07	2.706e-05	LOC121868356	uncharacterized LOC121868356
121867289	-2.7652	4.0024	25.394	4.6726e-07	2.8543e-05	LOC121867289	uncharacterized LOC121867289
121864619	-2.859	4.2218	25.386	4.6922e-07	2.8543e-05	LOC121864619	cytochrome P450 2J4-like
121872559	-2.0727	0.08477	25.307	4.8891e-07	2.9441e-05	LOC121872559	protein Aster-C-like
121854351	-4.1996	-0.51201	25.253	5.0277e-07	3.01e-05	LOC121854351	uncharacterized LOC121854351
121870004	-1.5785	2.7265	25.252	5.032e-07	3.01e-05	LOC121870004	carbohydrate sulfotransferase 1-like, transcript variant X3
121870025	-3.1523	4.4018	25.216	5.1259e-07	3.0559e-05	LOC121870025	phosphomethylethanolamine N-methyltransferase-like
121880075	-2.3854	3.3147	25.197	5.1773e-07	3.0735e-05	LOC121880075	adenylate cyclase type 1-like
121870613	-2.8549	2.0896	25.192	5.1897e-07	3.0735e-05	LOC121870613	uncharacterized LOC121870613, transcript variant X2
121872466	-1.5753	4.4524	25.117	5.3958e-07	3.1851e-05	LOC121872466	lactosylceramide 4-alpha-galactosyltransferase-like, transcript variant X4
121871766	-2.8122	4.1796	25.025	5.6594e-07	3.3227e-05	LOC121871766	retinol-binding protein pinta-like, transcript variant X6
121854107	-2.6388	2.3797	25.015	5.6885e-07	3.3227e-05	LOC121854107	innexin inx2-like, transcript variant X1
121857032	-4.012	2.8918	25.01	5.7029e-07	3.3227e-05	LOC121857032	digestive cysteine proteinase 2
121861448	-1.8856	4.1173	24.921	5.9727e-07	3.4686e-05	LOC121861448	acidic mammalian chitinase-like
121866386	-2.1026	3.0343	24.844	6.2162e-07	3.5984e-05	LOC121866386	N-sulphoglucosamine sulphohydrolase-like, transcript variant X3
121856786	-2.7526	2.0969	24.831	6.2598e-07	3.612e-05	LOC121856786	monocarboxylate transporter 9-like
121860784	-3.7366	3.7721	24.817	6.3031e-07	3.6253e-05	LOC121860784	amino acid transporter AVT1D-like, transcript variant X3
121858424	-2.9516	2.196	24.708	6.6714e-07	3.8249e-05	LOC121858424	uncharacterized LOC121858424
121853127	-3.3417	1.1305	24.683	6.758e-07	3.8622e-05	LOC121853127	uncharacterized LOC121853127
121877355	-2.9517	3.2251	24.659	6.8434e-07	3.8986e-05	LOC121877355	fatty-acid amide hydrolase 2-B-like, transcript variant X3
121870244	-1.9215	1.3988	24.651	6.8707e-07	3.9017e-05	LOC121870244	uncharacterized LOC121870244
121853171	-3.0835	4.7245	24.628	6.9529e-07	3.936e-05	LOC121853171	esterase FE4-like, transcript variant X1
121863752	-3.1352	2.683	24.591	7.0887e-07	4.0002e-05	LOC121863752	uncharacterized LOC121863752
121857195	-1.9881	0.4756	24.37	7.9483e-07	4.4159e-05	LOC121857195	lysosomal acid glucosylceramidase-like
121867549	-1.6058	3.3157	24.287	8.3007e-07	4.5552e-05	LOC121867549	leucine-rich repeat extensin-like protein 5
121864465	-3.1803	-0.10026	24.227	8.5604e-07	4.6834e-05	LOC121864465	cytochrome P450 2L1-like
121870352	-2.6847	3.7256	24.199	8.6898e-07	4.7398e-05	LOC121870352	trypsin-1-like
121860186	-3.1649	5.6841	24.174	8.8034e-07	4.7872e-05	LOC121860186	anti-lipopolysaccharide factor-like
121875268	-2.4661	1.1253	24.116	9.0715e-07	4.918e-05	LOC121875268	beta-1,4-glucuronyltransferase 1-like
121878751	-3.8232	-0.94739	24.11	9.1002e-07	4.9188e-05	LOC121878751	endoglucanase E-4-like
121868746	2.6118	5.8206	24.09	9.1917e-07	4.9533e-05	LOC121868746	uncharacterized LOC121868746
121871232	-3.8044	0.24963	24.072	9.2789e-07	4.9853e-05	LOC121871232	uncharacterized LOC121871232
121872728	-3.1507	5.4998	23.987	9.701e-07	5.1811e-05	LOC121872728	UDP-glucosyltransferase 2-like
121872475	-3.0499	3.8721	23.888	1.0209e-06	5.4361e-05	LOC121872475	alkylglycerol monooxygenase-like
121875054	-4.5053	6.7581	23.873	1.0292e-06	5.464e-05	LOC121875054	uncharacterized LOC121875054
121870757	-3.0664	3.8543	23.832	1.0514e-06	5.5654e-05	LOC121870757	uncharacterized LOC121870757
121853868	-2.8352	1.2825	23.81	1.0635e-06	5.5966e-05	LOC121853868	baculoviral IAP repeat-containing protein 7-B-like
121862193	-3.2551	3.2945	23.801	1.0683e-06	5.6052e-05	LOC121862193	ABC transporter G family member 20-like
121857259	3.5509	0.68744	23.782	1.079e-06	5.6343e-05	LOC121857259	uncharacterized LOC121857259, transcript variant X2
121856801	-2.4916	2.9417	23.78	1.0801e-06	5.6343e-05	LOC121856801	uncharacterized LOC121856801
121878337	-2.3324	3.4831	23.762	1.0903e-06	5.671e-05	LOC121878337	transcription factor E3-like
121855268	-3.6168	3.0561	23.754	1.0945e-06	5.6765e-05	LOC121855268	cytochrome P450 3A2-like, transcript variant X2
121855557	-2.3247	2.7698	23.72	1.1139e-06	5.744e-05	LOC121855557	transient receptor potential channel pyrexia-like, transcript variant X2
121865056	-1.5974	4.4824	23.689	1.1321e-06	5.7988e-05	LOC121865056	luciferin sulfotransferase-like
121864118	-2.3723	3.2049	23.686	1.1342e-06	5.7988e-05	LOC121864118	uncharacterized LOC121864118
121868986	-2.8999	3.2937	23.67	1.1433e-06	5.8285e-05	LOC121868986	interaptin-like, transcript variant X1
121857102	-4.8366	4.2272	23.591	1.1911e-06	6.0212e-05	LOC121857102	uncharacterized LOC121857102
121853161	-2.5597	3.9213	23.495	1.2521e-06	6.3117e-05	LOC121853161	juvenile hormone esterase-like
121857664	-1.9956	0.23945	23.471	1.2683e-06	6.3752e-05	LOC121857664	uncharacterized LOC121857664
121879219	-4.0824	3.3698	23.465	1.2721e-06	6.3763e-05	LOC121879219	uncharacterized LOC121879219, transcript variant X2
121853585	-1.9995	4.4801	23.439	1.2896e-06	6.4462e-05	LOC121853585	erythroid transcription factor-like, transcript variant X4
121863062	-3.3046	4.2261	23.359	1.3444e-06	6.7013e-05	LOC121863062	putative inorganic phosphate cotransporter, transcript variant X2
121855516	-3.6223	8.8729	23.335	1.3612e-06	6.7664e-05	LOC121855516	endochitinase-like
121879030	-1.9494	3.7582	23.239	1.4307e-06	7.0923e-05	LOC121879030	venom phosphodiesterase-like
121870024	-1.575	3.4336	23.224	1.4418e-06	7.1276e-05	LOC121870024	phosphoethanolamine N-methyltransferase 3-like
121860928	-2.5599	3.018	23.206	1.4552e-06	7.1743e-05	LOC121860928	acidic mammalian chitinase-like
121878393	-3.5307	0.0038843	23.2	1.4599e-06	7.1774e-05	LOC121878393	probable chitinase 2
121874311	-2.5774	1.7791	23.177	1.4779e-06	7.246e-05	LOC121874311	regucalcin-like, transcript variant X1
121858656	-2.2151	2.8603	23.115	1.5263e-06	7.4429e-05	LOC121858656	beta-1,4-galactosyltransferase galt-1-like, transcript variant X3
121861559	-2.9821	2.739	23.067	1.5645e-06	7.5975e-05	LOC121861559	substance-K receptor-like
121877729	-3.8802	-0.0089537	23.065	1.5665e-06	7.5975e-05	LOC121877729	uncharacterized LOC121877729
121872151	-3.7365	5.0121	23.054	1.5752e-06	7.6192e-05	LOC121872151	nose resistant to fluoxetine protein 6-like
121875504	-1.703	5.6667	23.045	1.5823e-06	7.633e-05	LOC121875504	heat shock protein 22-like
121864788	-3.7356	-0.12339	23	1.6198e-06	7.793e-05	LOC121864788	venom phosphodiesterase-like
121879056	-1.5398	2.6031	22.964	1.6503e-06	7.911e-05	LOC121879056	sphingomyelin phosphodiesterase-like
121875445	-3.4538	3.2023	22.961	1.6532e-06	7.911e-05	LOC121875445	glutathione S-transferase 1-1-like
121854312	-2.4653	5.9391	22.928	1.6818e-06	8.0267e-05	LOC121854312	fatty acid-binding protein, liver-like
121873196	-4.0638	1.6938	22.853	1.7492e-06	8.3259e-05	LOC121873196	alpha-(1,3)-fucosyltransferase C-like, transcript variant X1
121859332	-1.7604	6.2198	22.768	1.8276e-06	8.6341e-05	LOC121859332	organic cation transporter protein-like
121869055	-2.0242	2.427	22.767	1.8283e-06	8.6341e-05	LOC121869055	trichohyalin-like, transcript variant X1
121857743	-2.3569	4.3258	22.76	1.835e-06	8.6428e-05	LOC121857743	uncharacterized LOC121857743, transcript variant X1
121862253	-2.2452	2.5427	22.718	1.8762e-06	8.8139e-05	LOC121862253	A-agglutinin anchorage subunit-like, transcript variant X2
121868967	-1.9237	4.144	22.711	1.8832e-06	8.8235e-05	LOC121868967	uncharacterized LOC121868967
121877450	-1.8786	3.4171	22.703	1.891e-06	8.8369e-05	LOC121877450	toll-like receptor 13
121867236	-3.5385	-0.43656	22.688	1.9057e-06	8.8826e-05	LOC121867236	macrophage mannose receptor 1-like
121857097	-2.8098	5.8397	22.536	2.0627e-06	9.5892e-05	LOC121857097	delta-1-pyrroline-5-carboxylate synthase-like
121878846	-3.6549	1.2261	22.506	2.0946e-06	9.6849e-05	LOC121878846	caspase-1-like, transcript variant X1
121873421	-1.9416	4.4733	22.477	2.1264e-06	9.7842e-05	LOC121873421	neuronal acetylcholine receptor subunit alpha-7-like
121854111	-1.6977	2.7269	22.449	2.1582e-06	9.9053e-05	LOC121854111	solute carrier family 49 member A3-like
121872431	-3.094	2.6282	22.399	2.2148e-06	0.00010139	LOC121872431	uncharacterized LOC121872431
121860460	-2.6423	0.58261	22.392	2.2224e-06	0.00010148	LOC121860460	oplophorus-luciferin 2-monooxygenase non-catalytic subunit-like
121872308	-2.2753	2.7919	22.385	2.231e-06	0.00010161	LOC121872308	uncharacterized LOC121872308, transcript variant X2
121859368	-5.1734	-0.56465	22.368	2.2507e-06	0.00010225	LOC121859368	uncharacterized LOC121859368
121857028	-3.1451	4.7161	22.355	2.2661e-06	0.00010269	LOC121857028	digestive cysteine proteinase 1
121870059	-2.421	2.253	22.349	2.2736e-06	0.00010277	LOC121870059	mucin-2-like
121860210	-3.0215	4.7907	22.333	2.2929e-06	0.00010338	LOC121860210	nose resistant to fluoxetine protein 6-like, transcript variant X2
121863990	-2.9905	2.2141	22.321	2.3061e-06	0.00010372	LOC121863990	uncharacterized LOC121863990
121867107	-3.7575	1.3039	22.241	2.4047e-06	0.00010761	LOC121867107	phospholipase A2 SSD387-like
121871178	-2.5345	4.2694	22.194	2.4639e-06	0.00010998	LOC121871178	uncharacterized LOC121871178, transcript variant X2
121880198	-2.8911	3.3304	22.177	2.4859e-06	0.00011055	LOC121880198	ceramide synthase 6-like, transcript variant X1
121867721	-2.3767	3.4507	22.175	2.4888e-06	0.00011055	LOC121867721	heme-binding protein 1-like, transcript variant X1
121875184	-2.7692	5.624	22.138	2.5379e-06	0.00011217	LOC121875184	uncharacterized LOC121875184
121859440	-2.0171	2.0959	22.08	2.6151e-06	0.00011505	LOC121859440	trypsin-1-like
121870996	-2.4332	5.4218	22.079	2.6159e-06	0.00011505	LOC121870996	major facilitator superfamily domain-containing protein 12-like, transcript variant X4
121865075	-2.3964	2.5848	22.031	2.683e-06	0.00011772	LOC121865075	uncharacterized LOC121865075
121879387	-2.9999	4.8498	22.013	2.7078e-06	0.00011851	LOC121879387	probable 4-coumarate--CoA ligase 3
121868965	-4.3912	0.89022	22.007	2.7165e-06	0.00011861	LOC121868965	ankyrin-3-like, transcript variant X2
121875294	-1.7453	4.6957	21.99	2.7402e-06	0.00011935	LOC121875294	uncharacterized LOC121875294
121877344	-2.0058	4.3127	21.947	2.8032e-06	0.0001218	LOC121877344	uncharacterized LOC121877344
121862919	-3.0076	2.0077	21.936	2.8189e-06	0.00012219	LOC121862919	uncharacterized LOC121862919
121868277	-5.6645	-1.4899	21.908	2.8599e-06	0.00012366	LOC121868277	endoglucanase E-4-like
121859679	-2.6828	-0.42535	21.836	2.9701e-06	0.00012751	LOC121859679	uncharacterized LOC121859679
121873224	-2.1745	3.0061	21.791	3.0399e-06	0.00012927	LOC121873224	histidine-rich glycoprotein-like, transcript variant X2
121873395	-2.9067	1.6139	21.73	3.1393e-06	0.00013318	LOC121873395	uncharacterized LOC121873395
121869714	2.3332	8.2806	21.693	3.199e-06	0.00013539	LOC121869714	crustacyanin-A2 subunit
121880265	-2.1581	-0.14782	21.617	3.3291e-06	0.00014057	LOC121880265	vegetative cell wall protein gp1-like
121874164	-3.7537	3.5755	21.595	3.3673e-06	0.00014185	LOC121874164	putative phosphoenolpyruvate synthase
121856379	-2.2501	3.8446	21.482	3.5726e-06	0.00015014	LOC121856379	uncharacterized LOC121856379, transcript variant X3
121877711	-2.0936	3.3883	21.461	3.6102e-06	0.00015136	LOC121877711	uncharacterized LOC121877711, transcript variant X1
121876801	-2.8962	6.9202	21.391	3.7455e-06	0.00015667	LOC121876801	delta(7)-sterol 5(6)-desaturase erg32-like
121878026	-3.0661	1.0697	21.382	3.7627e-06	0.00015703	LOC121878026	uncharacterized LOC121878026
121864322	-2.5446	6.3074	21.346	3.8337e-06	0.00015962	LOC121864322	glycine N-methyltransferase-like, transcript variant X4
121877267	-2.9639	3.3109	21.335	3.8571e-06	0.00016022	LOC121877267	uncharacterized LOC121877267
121868467	-2.5924	3.5802	21.314	3.8981e-06	0.00016118	LOC121868467	UDP-glucosyltransferase 2-like
121863041	-2.9036	6.4254	21.291	3.9452e-06	0.00016275	LOC121863041	juvenile hormone esterase-like
121879222	-2.6732	3.9738	21.208	4.1213e-06	0.00016962	LOC121879222	uncharacterized LOC121879222
121868975	-4.07	0.80567	21.2	4.1386e-06	0.00016974	LOC121868975	poly [ADP-ribose] polymerase tankyrase-1-like
121858340	-2.8025	6.6935	21.198	4.1429e-06	0.00016974	LOC121858340	copper-specific metallothionein-2-like
121860112	-2.9877	2.4434	21.179	4.1834e-06	0.000171	LOC121860112	uncharacterized LOC121860112
121861403	-3.1715	0.61586	21.171	4.1999e-06	0.00017129	LOC121861403	integrin alpha-PS3-like, transcript variant X1
121870124	-6.2958	-1.4098	21.142	4.2644e-06	0.00017353	LOC121870124	cytochrome P450 6k1-like, transcript variant X1
121855522	-5.649	-2.2557	21.13	4.2914e-06	0.00017423	LOC121855522	uncharacterized LOC121855522
121857264	-6.6574	2.0585	21.088	4.387e-06	0.00017771	LOC121857264	uncharacterized LOC121857264
121876536	-1.9647	0.48403	21.073	4.4208e-06	0.00017867	LOC121876536	vitelline membrane outer layer protein 1-like, transcript variant X2
121868295	-1.8694	3.437	20.908	4.8178e-06	0.00019333	LOC121868295	carboxypeptidase Q-like
121879283	-5.2607	0.78312	20.905	4.8265e-06	0.00019333	LOC121879283	hemocyanin B chain-like
121856957	-4.9653	-1.5422	20.899	4.8415e-06	0.0001935	LOC121856957	uncharacterized LOC121856957
121861054	-2.3873	3.7309	20.871	4.9125e-06	0.00019578	LOC121861054	uncharacterized LOC121861054
121856942	-2.4014	3.9911	20.868	4.9205e-06	0.00019578	LOC121856942	uncharacterized LOC121856942
121868548	-2.0656	2.5985	20.842	4.988e-06	0.00019759	LOC121868548	trypsin-1-like
121858991	-4.7752	1.4218	20.792	5.1197e-06	0.00020236	LOC121858991	phosphatidylinositol transfer protein alpha isoform-like
121876181	-4.6524	4.3706	20.734	5.2772e-06	0.00020767	LOC121876181	NPC intracellular cholesterol transporter 1-like
121876866	-2.4942	0.33954	20.711	5.3406e-06	0.0002088	LOC121876866	nose resistant to fluoxetine protein 6-like
121859752	-1.7825	3.3351	20.703	5.362e-06	0.00020918	LOC121859752	NPC intracellular cholesterol transporter 2-like
121876829	-3.1505	3.812	20.63	5.5704e-06	0.00021637	LOC121876829	innexin inx1-like
121858590	-3.3072	2.6061	20.613	5.6205e-06	0.00021772	LOC121858590	perlucin-like protein
121870202	-3.0275	5.4483	20.61	5.6306e-06	0.00021772	LOC121870202	uncharacterized LOC121870202
121860224	-4.8057	-0.16352	20.606	5.6416e-06	0.00021772	LOC121860224	uncharacterized LOC121860224
121872724	-1.6292	4.6484	20.528	5.8775e-06	0.00022633	LOC121872724	uncharacterized LOC121872724, transcript variant X1
121878460	-2.4674	0.10136	20.489	5.9981e-06	0.00023048	LOC121878460	uncharacterized LOC121878460
121862186	-2.1723	3.7334	20.435	6.1689e-06	0.00023654	LOC121862186	lipase 3-like
121864531	-3.1384	3.1676	20.414	6.2362e-06	0.00023861	LOC121864531	arylsulfatase H-like, transcript variant X2
121865395	-3.0185	2.8171	20.321	6.5491e-06	0.00024952	LOC121865395	gamma-butyrobetaine dioxygenase-like
121859233	-3.8581	0.37056	20.244	6.8161e-06	0.00025805	LOC121859233	uncharacterized LOC121859233
121863393	-4.8319	-1.6782	20.22	6.9016e-06	0.00026019	LOC121863393	dipeptidyl peptidase 1-like
121874343	-2.5542	2.6473	20.212	6.9333e-06	0.00026084	LOC121874343	glycoprotein-N-acetylgalactosamine 3-beta-galactosyltransferase 1-like
121861591	-2.0766	1.0501	20.199	6.9802e-06	0.0002615	LOC121861591	substance-K receptor-like, transcript variant X1
121858279	-2.0271	1.8238	20.14	7.1994e-06	0.00026859	LOC121858279	uncharacterized LOC121858279, transcript variant X1
121867725	-3.0267	4.4884	20.13	7.2359e-06	0.00026913	LOC121867725	heme-binding protein 1-like
121867291	-2.6318	4.0622	20.128	7.2437e-06	0.00026913	LOC121867291	uncharacterized LOC121867291
121861092	-3.2878	10.068	20.084	7.4119e-06	0.00027481	LOC121861092	uncharacterized LOC121861092
121872630	-3.4738	2.3393	20.043	7.5735e-06	0.00028022	LOC121872630	lysosomal acid glucosylceramidase-like
121872155	-5.0801	2.6576	20.006	7.7204e-06	0.00028507	LOC121872155	uncharacterized LOC121872155
121854469	-2.4383	5.2542	19.983	7.8133e-06	0.0002879	LOC121854469	uncharacterized LOC121854469
121863749	-3.2953	5.8092	19.895	8.1814e-06	0.00030023	LOC121863749	histidine-rich glycoprotein-like
121878501	-1.8812	3.3958	19.882	8.2363e-06	0.00030102	LOC121878501	uncharacterized LOC121878501
121870357	-2.4232	6.0047	19.866	8.3084e-06	0.00030304	LOC121870357	uncharacterized LOC121870357
121854091	-2.8085	2.7375	19.841	8.4146e-06	0.00030618	LOC121854091	uncharacterized LOC121854091
121876034	-1.8137	2.6162	19.838	8.4288e-06	0.00030618	LOC121876034	maltase-glucoamylase, intestinal-like
121870290	-1.603	2.9979	19.792	8.6322e-06	0.00031168	LOC121870290	estradiol 17-beta-dehydrogenase 8-like, transcript variant X1
121865979	-3.9689	3.0833	19.779	8.6926e-06	0.00031323	LOC121865979	gamma-butyrobetaine dioxygenase-like
121869734	2.4614	5.9021	19.763	8.765e-06	0.00031521	LOC121869734	crustacyanin-A2 subunit
121869686	1.9338	9.5093	19.753	8.8132e-06	0.00031631	LOC121869686	crustacyanin-C1 subunit
121853162	-2.7488	2.29	19.738	8.8794e-06	0.00031805	LOC121853162	uncharacterized LOC121853162
121872939	-2.8669	3.0815	19.717	8.979e-06	0.00032033	LOC121872939	putative inorganic phosphate cotransporter
121876466	-3.1792	2.3158	19.713	8.9983e-06	0.00032039	LOC121876466	UDP-glycosyltransferase UGT5-like
121873675	-1.6094	3.8521	19.657	9.2667e-06	0.00032906	LOC121873675	uncharacterized LOC121873675
121865924	-3.2644	2.9193	19.654	9.2787e-06	0.00032906	LOC121865924	dehydrogenase/reductase SDR family member 11-like
121861304	-2.8142	2.8897	19.628	9.4064e-06	0.00033293	LOC121861304	uncharacterized LOC121861304
121879468	-2.8156	0.40616	19.598	9.5583e-06	0.00033765	LOC121879468	uncharacterized LOC121879468
121865165	-5.6483	-1.5257	19.531	9.8995e-06	0.00034901	LOC121865165	endoglucanase E-4-like
121853899	-1.5535	3.6191	19.523	9.9386e-06	0.0003497	LOC121853899	uncharacterized LOC121853899, transcript variant X1
121862316	-3.5614	4.6496	19.469	1.0225e-05	0.00035909	LOC121862316	protein mesh-like
121870554	-3.5469	0.83748	19.46	1.0272e-05	0.00035916	LOC121870554	uncharacterized LOC121870554
121867251	-4.0371	0.052463	19.457	1.0287e-05	0.00035916	LOC121867251	uncharacterized LOC121867251
121858168	-2.4285	3.9511	19.453	1.031e-05	0.00035923	LOC121858168	aminopeptidase N-like
121868830	-2.8245	1.0589	19.433	1.0422e-05	0.00036243	LOC121868830	zinc metalloproteinase nas-4-like
121872624	-2.6576	1.8953	19.42	1.0492e-05	0.00036419	LOC121872624	cellular tumor antigen p53-like
121877005	-3.7801	3.3444	19.399	1.0604e-05	0.00036737	LOC121877005	facilitated trehalose transporter Tret1-like
121853558	-2.6536	1.977	19.392	1.0644e-05	0.00036803	LOC121853558	extended synaptotagmin-3-like, transcript variant X2
121854207	-4.3521	-1.8054	19.373	1.0753e-05	0.00037003	LOC121854207	4-coumarate--CoA ligase-like
121859617	-3.33	-1.5863	19.371	1.0764e-05	0.00037003	LOC121859617	uncharacterized LOC121859617
121879944	-1.9671	1.3099	19.367	1.0786e-05	0.00037009	LOC121879944	techylectin-5A-like
121879415	-2.9821	-0.60896	19.34	1.0942e-05	0.00037399	LOC121879415	uncharacterized LOC121879415
121858694	-1.7948	2.891	19.275	1.1317e-05	0.00038608	LOC121858694	carboxypeptidase B-like, transcript variant X1
121859911	-2.2912	0.7421	19.261	1.1404e-05	0.00038832	LOC121859911	serum amyloid A-5 protein-like, transcript variant X1
121856658	-2.5775	3.0873	19.24	1.1525e-05	0.0003917	LOC121856658	uncharacterized LOC121856658
121877349	-4.5882	2.3892	19.223	1.1632e-05	0.0003946	LOC121877349	uncharacterized LOC121877349
121869110	-2.0884	4.9082	19.181	1.1891e-05	0.00040218	LOC121869110	ankyrin-3-like, transcript variant X2
121866702	-1.6281	0.96099	19.179	1.1901e-05	0.00040218	LOC121866702	vesicle-trafficking protein SEC22b-A-like
121869883	-2.5126	0.92502	19.171	1.1949e-05	0.00040306	LOC121869883	ankyrin-3-like, transcript variant X2
121877893	-2.0901	2.3148	19.161	1.2012e-05	0.00040379	LOC121877893	haloalkane dehalogenase-like, transcript variant X2
121873176	-2.4523	4.9131	19.161	1.2016e-05	0.00040379	LOC121873176	4-coumarate--CoA ligase 3-like, transcript variant X2
121866196	-2.7743	0.52717	19.146	1.2112e-05	0.00040627	LOC121866196	uncharacterized LOC121866196, transcript variant X1
121858992	-5.2578	0.2589	19.134	1.2184e-05	0.0004079	LOC121858992	uncharacterized LOC121858992
121880485	-3.594	4.7706	19.13	1.2213e-05	0.00040811	LOC121880485	UDP-glucosyltransferase 2-like
121858580	-2.0633	1.409	19.047	1.2755e-05	0.00042509	LOC121858580	endoglucanase A-like
121864928	-1.5108	4.1707	19.041	1.2792e-05	0.00042509	LOC121864928	uncharacterized LOC121864928, transcript variant X2
121864502	-3.4652	0.54014	18.975	1.3247e-05	0.00043859	LOC121864502	uncharacterized LOC121864502
121865770	-2.7218	2.1935	18.939	1.3497e-05	0.00044523	LOC121865770	uncharacterized LOC121865770
121863986	-2.471	0.48915	18.918	1.3647e-05	0.00044934	LOC121863986	monocarboxylate transporter 2-like, transcript variant X2
121874480	-3.2702	4.837	18.898	1.3787e-05	0.00045312	LOC121874480	uncharacterized LOC121874480
121878948	-2.1035	2.581	18.878	1.3933e-05	0.00045709	LOC121878948	uncharacterized LOC121878948, transcript variant X2
121871067	-3.2093	2.2786	18.869	1.4003e-05	0.00045735	LOC121871067	MAM and LDL-receptor class A domain-containing protein 2-like
121880057	-4.0322	11.143	18.869	1.4004e-05	0.00045735	LOC121880057	hemocyanin C chain-like
121861926	-1.9881	4.5339	18.854	1.4109e-05	0.0004595	LOC121861926	adenosine deaminase 2-like, transcript variant X1
121869696	2.0847	9.8456	18.837	1.4236e-05	0.0004625	LOC121869696	crustacyanin-A2 subunit-like
121872522	-3.6985	1.3842	18.835	1.4253e-05	0.0004625	LOC121872522	uncharacterized LOC121872522
121866083	-1.5773	0.85055	18.811	1.4437e-05	0.00046763	LOC121866083	uncharacterized LOC121866083, transcript variant X1
121879419	-2.133	0.78226	18.778	1.4686e-05	0.00047485	LOC121879419	uncharacterized LOC121879419
121861147	-2.5585	-0.066027	18.716	1.5171e-05	0.00048875	LOC121861147	wiskott-Aldrich syndrome protein homolog
121877318	-4.3753	8.4095	18.709	1.523e-05	0.00048979	LOC121877318	hemocyanin A chain-like
121860769	-2.3394	2.7607	18.697	1.5325e-05	0.00049195	LOC121860769	uncharacterized LOC121860769
121859412	-2.2379	1.0365	18.655	1.5667e-05	0.00049993	LOC121859412	metalloreductase STEAP4-like, transcript variant X2
121860994	-2.2956	2.0595	18.652	1.5685e-05	0.00049993	LOC121860994	formin-like protein 3
121865767	-1.7935	3.123	18.62	1.5953e-05	0.00050757	LOC121865767	solute carrier family 46 member 3-like, transcript variant X1
121869706	2.095	9.0025	18.6	1.6119e-05	0.00051194	LOC121869706	crustacyanin-C1 subunit-like
121875723	-2.2023	2.2526	18.583	1.6271e-05	0.00051495	LOC121875723	phospholipid-transporting ATPase IF-like, transcript variant X1
121860919	-3.7605	2.7671	18.577	1.632e-05	0.00051533	LOC121860919	chitinase-3-like protein 1
121879296	-4.1621	11.122	18.574	1.634e-05	0.00051533	LOC121879296	hemocyanin B chain-like
121879299	-3.8722	2.5249	18.563	1.6436e-05	0.00051744	LOC121879299	succinate-semialdehyde dehydrogenase, mitochondrial-like, transcript variant X4
121864292	-2.1974	0.41214	18.549	1.6556e-05	0.00051909	LOC121864292	baculoviral IAP repeat-containing protein 7-like
121854789	-2.6779	0.92364	18.548	1.6568e-05	0.00051909	LOC121854789	uncharacterized LOC121854789
121873658	-2.8488	4.3059	18.547	1.6575e-05	0.00051909	LOC121873658	tetraspanin-2A-like, transcript variant X1
121853205	-2.4221	4.2435	18.52	1.681e-05	0.00052552	LOC121853205	uncharacterized LOC121853205, transcript variant X2
121856923	-2.3943	6.7064	18.506	1.6939e-05	0.00052773	LOC121856923	digestive cysteine proteinase 3-like
121880153	-1.693	2.1663	18.485	1.7129e-05	0.00053273	LOC121880153	epidermal retinol dehydrogenase 2-like, transcript variant X2
121863421	-2.6122	6.9685	18.461	1.734e-05	0.00053742	LOC121863421	chitinase-3-like protein 1
121879406	-3.9123	2.7045	18.43	1.7626e-05	0.00054441	LOC121879406	protein snakeskin-like
121862488	-2.9731	-2.0716	18.404	1.7865e-05	0.00055083	LOC121862488	glucose dehydrogenase [FAD, quinone]-like
121859394	-2.0068	1.7565	18.352	1.8367e-05	0.00056439	LOC121859394	uncharacterized LOC121859394
121865518	-3.4317	3.8656	18.336	1.8519e-05	0.0005671	LOC121865518	protein peste-like
121869966	-3.6865	0.37327	18.332	1.8557e-05	0.0005673	LOC121869966	uncharacterized LOC121869966, transcript variant X1
121870728	-1.918	0.26801	18.314	1.8733e-05	0.00057171	LOC121870728	proton-coupled folate transporter-like
121878279	3.5015	-0.7879	18.31	1.8774e-05	0.00057199	LOC121878279	cytochrome P450 6k1-like
121869164	-3.219	3.3198	18.287	1.9e-05	0.00057788	LOC121869164	UDP-glucosyltransferase 2-like, transcript variant X3
121858242	-2.8066	2.9206	18.238	1.9498e-05	0.00058943	LOC121858242	uncharacterized LOC121858242, transcript variant X1
121878019	-3.6709	1.8558	18.237	1.9506e-05	0.00058943	LOC121878019	uncharacterized LOC121878019
121876843	-1.7067	1.8134	18.236	1.9511e-05	0.00058943	LOC121876843	DNA damage-regulated autophagy modulator protein 1-like, transcript variant X1
121857663	-1.6465	0.38214	18.195	1.9935e-05	0.00060123	LOC121857663	uncharacterized LOC121857663
121858543	-2.9785	0.91049	18.161	2.03e-05	0.00060916	LOC121858543	uncharacterized LOC121858543
121863701	-4.0739	2.9545	18.154	2.0375e-05	0.0006104	LOC121863701	hemocyanin B chain-like
121864899	-1.9176	3.0198	18.117	2.0772e-05	0.0006192	LOC121864899	alpha-amylase-like
121865163	-5.9623	-2.1865	18.089	2.1079e-05	0.0006273	LOC121865163	endoglucanase E-4-like
121876212	-2.9957	5.4642	18.028	2.1768e-05	0.00064166	LOC121876212	tyrosine-protein phosphatase Lar-like
121867356	-3.3281	4.8129	18.027	2.1776e-05	0.00064166	LOC121867356	hemolymph clottable protein-like
121868106	-1.6015	4.5937	18.011	2.1965e-05	0.0006451	LOC121868106	histone-lysine N-methyltransferase, H3 lysine-79 specific-like
121863058	-2.4449	2.9538	17.977	2.236e-05	0.00065565	LOC121863058	laccase-like
121870048	-5.7386	-2.2864	17.941	2.2789e-05	0.00066603	LOC121870048	endoglucanase A-like
121874995	-2.6677	3.0025	17.926	2.2961e-05	0.00066999	LOC121874995	phospholipid-transporting ATPase ABCA3-like, transcript variant X2
121856244	-2.7595	4.1731	17.882	2.35e-05	0.00068378	LOC121856244	perlucin-like protein
121876535	-1.8772	2.2786	17.881	2.351e-05	0.00068378	LOC121876535	uncharacterized LOC121876535, transcript variant X1
121880300	-5.0522	-1.4714	17.874	2.3604e-05	0.0006854	LOC121880300	sodium-dependent dopamine transporter-like
121872354	-1.6159	2.5612	17.806	2.4456e-05	0.00070784	LOC121872354	carbohydrate sulfotransferase 11-like, transcript variant X2
121861093	-4.0239	11.579	17.784	2.4744e-05	0.00071503	LOC121861093	uncharacterized LOC121861093
121878162	-2.4232	1.1334	17.757	2.5102e-05	0.00072421	LOC121878162	gamma-gliadin-like
121861587	-3.0597	2.4281	17.705	2.5798e-05	0.0007431	LOC121861587	uncharacterized LOC121861587
121863251	-2.4263	4.2513	17.576	2.7611e-05	0.00079404	LOC121863251	lipase member H-like, transcript variant X2
121862700	-2.2563	3.8785	17.571	2.7681e-05	0.00079479	LOC121862700	uncharacterized LOC121862700
121880097	-1.7257	1.5741	17.556	2.789e-05	0.00079869	LOC121880097	uncharacterized LOC121880097
121880033	-2.2257	0.16225	17.555	2.7906e-05	0.00079869	LOC121880033	protein phosphatase 1 regulatory subunit 16A-like
121874890	-1.892	1.9516	17.526	2.8333e-05	0.00080834	LOC121874890	uncharacterized LOC121874890
121856585	-1.7684	2.6037	17.508	2.8617e-05	0.00081514	LOC121856585	C-type lectin domain family 17, member A-like
121856602	-2.051	2.7879	17.496	2.8793e-05	0.00081884	LOC121856602	uncharacterized LOC121856602
121855315	-2.1114	0.45015	17.488	2.8907e-05	0.0008208	LOC121855315	glycoprotein-N-acetylgalactosamine 3-beta-galactosyltransferase 1-like, transcript variant X1
121877417	-6.3419	2.5596	17.483	2.8985e-05	0.00082169	LOC121877417	hemocyanin A chain-like
121871482	-1.6462	4.3591	17.477	2.9077e-05	0.00082302	LOC121871482	putative methyltransferase DDB_G0268948, transcript variant X3
121864117	-2.5303	3.8647	17.473	2.9141e-05	0.00082352	LOC121864117	uncharacterized LOC121864117
121872122	-2.6606	-1.5966	17.445	2.9581e-05	0.00083464	LOC121872122	solute carrier family 46 member 3-like
121855000	-2.3287	2.2014	17.396	3.035e-05	0.0008523	LOC121855000	UTP--glucose-1-phosphate uridylyltransferase-like
121875450	-2.466	-0.43787	17.365	3.0852e-05	0.00086507	LOC121875450	uncharacterized LOC121875450
121862914	-1.8197	6.6849	17.352	3.1053e-05	0.00086935	LOC121862914	cytochrome b5-like
121867543	-2.8173	2.8464	17.341	3.1243e-05	0.00087329	LOC121867543	gamma-interferon-inducible lysosomal thiol reductase-like
121873669	-1.5974	2.624	17.319	3.1602e-05	0.00088196	LOC121873669	C-type lectin domain family 4 member M-like, transcript variant X4
121871947	-1.5235	5.4161	17.315	3.1675e-05	0.00088263	LOC121871947	cytochrome P450 3A29-like, transcript variant X1
121868982	-2.8175	1.1238	17.311	3.1739e-05	0.00088304	LOC121868982	uncharacterized LOC121868982, transcript variant X1
121876642	-2.173	4.7516	17.297	3.1965e-05	0.00088688	LOC121876642	C-type lectin domain family 17, member A-like
121861667	-2.6704	1.1709	17.291	3.2069e-05	0.00088688	LOC121861667	uncharacterized LOC121861667
121856584	-1.5743	3.1953	17.277	3.2303e-05	0.00089044	LOC121856584	perlucin-like
121863598	-3.5368	3.1997	17.273	3.2384e-05	0.0008913	LOC121863598	cytochrome P450 2L1-like
121871972	-2.1136	7.6074	17.209	3.3486e-05	0.00091675	LOC121871972	uncharacterized LOC121871972
121880128	-1.7065	2.6498	17.206	3.3543e-05	0.00091675	LOC121880128	transmembrane channel-like protein 7, transcript variant X3
121872662	-2.5869	3.5637	17.152	3.4503e-05	0.00093813	LOC121872662	peritrophin-48-like
121875839	1.9851	7.9461	17.027	3.685e-05	0.00099291	LOC121875839	crustacyanin-A2 subunit-like
121860783	-2.8373	2.8604	16.996	3.7462e-05	0.0010079	LOC121860783	amino acid transporter AVT1B-like
121866305	2.9421	0.48938	16.954	3.83e-05	0.0010274	LOC121866305	lactosylceramide 4-alpha-galactosyltransferase-like
121854046	-2.2444	1.0723	16.929	3.8804e-05	0.0010393	LOC121854046	uncharacterized LOC121854046, transcript variant X1
121872360	-2.363	1.7471	16.911	3.9169e-05	0.0010475	LOC121872360	nose resistant to fluoxetine protein 6-like, transcript variant X1
121867896	-1.8917	3.2426	16.868	4.0081e-05	0.0010687	LOC121867896	UDP-glycosyltransferase UGT5-like
121863825	-2.5818	2.9677	16.864	4.0155e-05	0.0010691	LOC121863825	mediator of DNA damage checkpoint protein 1-like
121869722	-2.2519	0.049259	16.852	4.0401e-05	0.0010725	LOC121869722	pro-resilin-like
121871065	-3.0377	2.6536	16.852	4.0402e-05	0.0010725	LOC121871065	MAM and LDL-receptor class A domain-containing protein 2-like
121866199	-2.5203	-0.46612	16.813	4.1246e-05	0.0010885	LOC121866199	uncharacterized LOC121866199
121865698	4.8635	-2.5643	16.769	4.2215e-05	0.0011092	LOC121865698	actin-binding protein IPP-like
121865991	-1.6622	3.0041	16.769	4.2216e-05	0.0011092	LOC121865991	sucrase-isomaltase, intestinal-like
121857123	-3.012	3.7615	16.745	4.2751e-05	0.0011199	LOC121857123	uncharacterized LOC121857123
121862667	-3.4481	-0.87733	16.699	4.3806e-05	0.0011426	LOC121862667	vitellogenin-like
121874322	-2.7704	-0.065524	16.688	4.4056e-05	0.0011474	LOC121874322	uncharacterized LOC121874322
121867235	-3.5733	-0.72768	16.661	4.4681e-05	0.001162	LOC121867235	macrophage mannose receptor 1-like
121879938	-2.8344	3.2608	16.654	4.4844e-05	0.0011646	LOC121879938	oplophorus-luciferin 2-monooxygenase non-catalytic subunit-like
121877107	-2.8502	-0.41075	16.612	4.5869e-05	0.001186	LOC121877107	uncharacterized LOC121877107
121876335	-3.5274	-0.23716	16.579	4.6663e-05	0.0012048	LOC121876335	collagen alpha-1(XIV) chain-like
121867700	-1.8747	3.8019	16.572	4.6833e-05	0.0012062	LOC121867700	phosphatidylinositol phosphatase PTPRQ-like
121857149	-1.9588	1.4003	16.547	4.7461e-05	0.0012202	LOC121857149	uncharacterized LOC121857149
121866824	-2.1894	5.0072	16.513	4.831e-05	0.0012385	LOC121866824	uncharacterized LOC121866824
121878891	-2.2315	5.8712	16.476	4.9271e-05	0.0012577	LOC121878891	betaine--homocysteine S-methyltransferase 1-like, transcript variant X2
121871127	-2.4453	4.7489	16.46	4.9689e-05	0.0012666	LOC121871127	NPC intracellular cholesterol transporter 2 homolog a-like
121854047	-2.3644	1.3519	16.437	5.0299e-05	0.0012791	LOC121854047	proton-coupled folate transporter-like
121869389	-2.1668	2.2565	16.436	5.0325e-05	0.0012791	LOC121869389	sucrase-isomaltase, intestinal-like
121869655	-2.7431	1.9787	16.429	5.0504e-05	0.0012801	LOC121869655	translation initiation factor IF-2-like, transcript variant X1
121863877	-1.6891	2.1948	16.417	5.0828e-05	0.0012847	LOC121863877	protein UBASH3A homolog
121862299	-2.7901	1.1956	16.392	5.1515e-05	0.0013002	LOC121862299	calcium and integrin-binding protein 1-like, transcript variant X1
121876453	-4.1878	3.4741	16.291	5.4313e-05	0.0013634	LOC121876453	UDP-glycosyltransferase UGT5-like
121879412	-2.698	1.5263	16.291	5.4324e-05	0.0013634	LOC121879412	uncharacterized LOC121879412
121853895	-5.5004	5.6709	16.27	5.4925e-05	0.0013766	LOC121853895	hemolymph clottable protein-like
121856079	-1.5729	0.043717	16.235	5.5955e-05	0.0014004	LOC121856079	uncharacterized protein DDB_G0290301-like
121857035	-2.2176	1.3327	16.213	5.6606e-05	0.0014128	LOC121857035	digestive cysteine proteinase 2-like
121874841	-3.5047	5.3222	16.179	5.762e-05	0.0014361	LOC121874841	cytochrome P450 2C31-like
121868234	-2.3731	0.18882	16.151	5.8496e-05	0.0014535	LOC121868234	cytochrome P450 3A31-like, transcript variant X2
121868527	-2.3564	3.6613	16.149	5.8563e-05	0.0014535	LOC121868527	trypsin-1-like
121868629	-2.89	4.2714	16.126	5.9253e-05	0.0014666	LOC121868629	chitinase-3-like protein 1
121873499	-1.5156	2.8385	16.074	6.0905e-05	0.0015034	LOC121873499	fibrinogen C domain-containing protein 1-like
121877339	-3.0365	0.55175	16.063	6.1257e-05	0.00151	LOC121877339	uncharacterized LOC121877339
121868630	-2.8321	5.1679	16.044	6.1894e-05	0.0015236	LOC121868630	acidic mammalian chitinase-like
121877730	3.2681	-2.3525	16.025	6.2521e-05	0.0015369	LOC121877730	extensin-2-like
121853893	4.4379	-2.9332	16.014	6.2871e-05	0.0015434	LOC121853893	uncharacterized LOC121853893
121877071	-2.0995	2.3129	15.999	6.3381e-05	0.0015517	LOC121877071	tyrosine-protein kinase SRK3-like, transcript variant X3
121865949	-3.7035	6.9143	15.976	6.4156e-05	0.0015664	LOC121865949	beta,beta-carotene 9',10'-oxygenase-like
121876745	-4.8055	-1.5143	15.971	6.4305e-05	0.0015673	LOC121876745	uncharacterized LOC121876745
121880331	-2.5135	1.2891	15.967	6.4447e-05	0.0015673	LOC121880331	UDP-xylose and UDP-N-acetylglucosamine transporter-like
121858515	-1.6707	1.8406	15.967	6.4456e-05	0.0015673	LOC121858515	CD63 antigen-like
121878744	-5.3912	0.74036	15.953	6.4931e-05	0.0015767	LOC121878744	cytochrome P450 4C1-like
121857034	-2.8841	4.2387	15.938	6.5447e-05	0.0015828	LOC121857034	digestive cysteine proteinase 1
121856988	-2.8841	4.2387	15.938	6.5448e-05	0.0015828	LOC121856988	digestive cysteine proteinase 1
121853517	-2.3638	2.0502	15.896	6.6934e-05	0.0016144	LOC121853517	cationic amino acid transporter 3-like, transcript variant X1
121878467	-2.547	0.89142	15.889	6.7178e-05	0.0016181	LOC121878467	uncharacterized LOC121878467
121864710	-3.117	0.64491	15.872	6.777e-05	0.0016302	LOC121864710	uncharacterized LOC121864710
121857033	-2.8482	4.4473	15.835	6.9122e-05	0.0016605	LOC121857033	digestive cysteine proteinase 1
121871013	-1.5264	2.6336	15.83	6.9305e-05	0.0016627	LOC121871013	bromodomain-containing protein 4B-like
121877352	-2.1069	2.8373	15.827	6.9412e-05	0.001663	LOC121877352	oplophorus-luciferin 2-monooxygenase non-catalytic subunit-like, transcript variant X3
121861310	-2.901	4.9729	15.796	7.0536e-05	0.0016854	LOC121861310	solute carrier family 22 member 21-like, transcript variant X5
121875657	-2.1706	2.4197	15.79	7.0773e-05	0.0016888	LOC121875657	phospholipid-transporting ATPase IF-like
121866993	-2.8845	1.9881	15.785	7.0944e-05	0.0016907	LOC121866993	vitelline membrane outer layer protein 1 homolog
121860185	-3.3179	2.6483	15.774	7.1387e-05	0.0016968	LOC121860185	nose resistant to fluoxetine protein 6-like, transcript variant X1
121859860	-2.8379	-0.10955	15.753	7.2192e-05	0.0017125	LOC121859860	uncharacterized LOC121859860
121877658	-2.1521	2.3451	15.751	7.2243e-05	0.0017125	LOC121877658	lithostathine-like
121855270	-3.4886	-0.29384	15.736	7.2809e-05	0.0017236	LOC121855270	tripartite motif-containing protein 59-like
121862529	1.5731	3.5946	15.734	7.29e-05	0.0017236	LOC121862529	glycine-rich protein 5-like
121876538	-2.186	2.6922	15.719	7.3488e-05	0.0017352	LOC121876538	vitelline membrane outer layer protein 1-like, transcript variant X1
121867297	-1.7981	1.2521	15.709	7.3857e-05	0.0017416	LOC121867297	polyadenylate-binding protein 1-like
121858658	-2.6088	-1.0243	15.684	7.4847e-05	0.001758	LOC121858658	endoglucanase A-like
121864289	4.8707	-2.6133	15.672	7.5348e-05	0.0017675	LOC121864289	uncharacterized LOC121864289
121880143	-1.7415	4.0702	15.638	7.6712e-05	0.0017948	LOC121880143	organic cation transporter protein-like, transcript variant X1
121854191	-3.9979	1.179	15.628	7.7115e-05	0.0018011	LOC121854191	innexin inx2-like
121855380	4.3552	-2.8341	15.617	7.7568e-05	0.0018054	LOC121855380	glycine-rich cell wall structural protein-like
121862293	-2.6618	6.993	15.597	7.8393e-05	0.0018222	LOC121862293	uncharacterized LOC121862293
121857134	-4.7526	1.386	15.57	7.9495e-05	0.0018417	LOC121857134	peritrophin-48-like
121866323	6.0073	-1.3482	15.567	7.9624e-05	0.0018417	LOC121866323	acidic leucine-rich nuclear phosphoprotein 32-related protein-like
121877662	-1.8462	0.76511	15.567	7.964e-05	0.0018417	LOC121877662	ceramide synthase 2-like
121858319	-1.7706	3.1136	15.561	7.9891e-05	0.0018427	LOC121858319	monocarboxylate transporter 12-like, transcript variant X2
121873009	-1.9149	0.073101	15.557	8.007e-05	0.0018445	LOC121873009	putative inorganic phosphate cotransporter, transcript variant X3
121853794	-1.6816	1.9183	15.539	8.0841e-05	0.0018594	LOC121853794	uncharacterized LOC121853794
121877773	1.7233	0.55979	15.536	8.0955e-05	0.0018594	LOC121877773	pro-resilin-like
121869522	-2.3715	1.3321	15.525	8.1402e-05	0.0018656	LOC121869522	uncharacterized LOC121869522, transcript variant X1
121865297	-2.2918	3.8955	15.501	8.248e-05	0.0018855	LOC121865297	uncharacterized LOC121865297
121877609	-1.6197	-0.29145	15.462	8.42e-05	0.0019199	LOC121877609	protein Ycf2-like
121868052	-2.73	2.8214	15.458	8.4348e-05	0.0019209	LOC121868052	GILT-like protein 1
121877332	-5.3019	3.7112	15.445	8.4938e-05	0.0019318	LOC121877332	hemocyanin A chain-like
121877397	-2.4008	5.7438	15.426	8.5819e-05	0.0019494	LOC121877397	apolipoprotein D-like
121872189	-3.618	-0.88313	15.413	8.6404e-05	0.0019602	LOC121872189	cytochrome P450 2L1-like
121869056	-1.5055	2.9528	15.292	9.2121e-05	0.002082	LOC121869056	ubiquitin-like modifier-activating enzyme 1
121868979	-2.377	2.8078	15.289	9.2237e-05	0.002082	LOC121868979	uncharacterized LOC121868979
121880228	7.3574	-0.87468	15.179	9.7777e-05	0.0021988	LOC121880228	cytochrome P450 6k1-like
121879245	-2.0213	0.45378	15.168	9.8358e-05	0.0022069	LOC121879245	serine-rich 25 kDa antigen protein-like
121872485	-3.757	-1.1835	15.167	9.8427e-05	0.0022069	LOC121872485	sodium- and chloride-dependent neutral and basic amino acid transporter B(0+)-like
121869723	2.0386	7.81	15.165	9.8507e-05	0.0022069	LOC121869723	crustacyanin-C1 subunit-like
121853575	-1.573	2.2823	15.13	0.00010038	0.0022376	LOC121853575	leucine-rich repeat-containing protein 4-like
121856941	-2.4926	8.054	15.119	0.00010096	0.0022478	LOC121856941	digestive cysteine proteinase 3-like
121857785	-1.5577	2.1236	15.05	0.00010468	0.0023248	LOC121857785	uncharacterized LOC121857785, transcript variant X1
121868863	-3.1708	1.2587	15.04	0.00010527	0.0023351	LOC121868863	uncharacterized LOC121868863, transcript variant X1
121872824	-2.0435	6.1983	15.029	0.0001059	0.0023461	LOC121872824	uncharacterized LOC121872824
121853399	1.7584	2.2108	14.979	0.00010869	0.0024049	LOC121853399	actin, muscle-like
121879943	-4.1996	2.6943	14.968	0.00010934	0.0024164	LOC121879943	serine protease inhibitor 88Ea-like, transcript variant X2
121880301	-2.5935	-0.055218	14.898	0.0001135	0.0025052	LOC121880301	sodium-dependent acetylcholine transporter-like
121867505	-3.0003	2.231	14.884	0.00011431	0.0025183	LOC121867505	pancreatic lipase-related protein 3-like
121876582	-2.9422	2.6403	14.883	0.00011437	0.0025183	LOC121876582	C-type lectin domain family 17, member A-like
121863319	-2.7126	-1.1148	14.839	0.00011707	0.0025713	LOC121863319	techylectin-5A-like
121859433	-2.0024	1.4475	14.8	0.00011956	0.002623	LOC121859433	uncharacterized LOC121859433, transcript variant X1
121867446	-5.4147	-2.146	14.74	0.00012337	0.0026933	LOC121867446	uncharacterized LOC121867446
121853576	-3.8885	-0.7146	14.732	0.00012392	0.002702	LOC121853576	uncharacterized LOC121853576, transcript variant X2
121877066	-2.4338	0.86421	14.726	0.00012433	0.0027076	LOC121877066	uncharacterized LOC121877066, transcript variant X2
121874170	-2.6366	0.87623	14.703	0.00012584	0.0027372	LOC121874170	von Willebrand factor A domain-containing protein 7-like
121864524	-1.9742	5.6846	14.7	0.00012605	0.0027384	LOC121864524	peritrophin-1-like
121862285	-2.0744	7.9224	14.663	0.00012853	0.0027857	LOC121862285	uncharacterized LOC121862285
121856500	-2.1546	0.43966	14.661	0.0001287	0.002786	LOC121856500	L-proline trans-4-hydroxylase-like
121872002	-3.095	5.3368	14.657	0.00012892	0.0027874	LOC121872002	NPC intracellular cholesterol transporter 1 homolog 1b-like
121879355	-1.9448	0.076857	14.647	0.00012964	0.0027963	LOC121879355	4-coumarate--CoA ligase-like 5
121871140	-3.7836	-0.78872	14.631	0.00013073	0.0028162	LOC121871140	uncharacterized LOC121871140
121879945	-4.0827	0.75729	14.591	0.00013358	0.0028742	LOC121879945	uncharacterized LOC121879945, transcript variant X3
121877420	-5.764	4.664	14.484	0.00014136	0.0030344	LOC121877420	hemocyanin A chain-like
121877717	-3.2574	2.406	14.431	0.0001454	0.0031136	LOC121877717	nose resistant to fluoxetine protein 6-like
121875506	-1.6878	3.7624	14.396	0.00014809	0.0031636	LOC121875506	uncharacterized LOC121875506
121862701	-2.2254	3.9199	14.367	0.0001504	0.0032053	LOC121862701	uncharacterized LOC121862701
121880036	-4.6156	4.4227	14.358	0.00015116	0.003214	LOC121880036	hemocyanin C chain-like
121878895	-3.0787	8.8561	14.324	0.00015387	0.0032639	LOC121878895	betaine--homocysteine S-methyltransferase 1-like
121858232	-2.6064	5.0976	14.272	0.0001582	0.0033437	LOC121858232	glutathione peroxidase-like
121860937	-3.9583	1.1423	14.268	0.0001585	0.0033463	LOC121860937	chitinase-3-like protein 1
121855680	-2.1658	0.89473	14.261	0.00015912	0.0033553	LOC121855680	facilitated trehalose transporter Tret1-like, transcript variant X1
121878054	-1.7171	1.6595	14.253	0.00015984	0.0033667	LOC121878054	caspase-1-like, transcript variant X2
121864602	-1.896	0.86414	14.23	0.0001618	0.003404	LOC121864602	uncharacterized LOC121864602, transcript variant X3
121859289	2.9538	-1.2296	14.119	0.00017157	0.0036011	LOC121859289	cytochrome P450 6k1-like
121864618	-1.8295	1.5711	14.117	0.00017182	0.0036021	LOC121864618	sulfoquinovosidase-like
121878172	-3.7639	0.95291	14.102	0.0001732	0.0036268	LOC121878172	B1-hordein-like
121879461	-2.5933	0.16363	14.082	0.00017501	0.0036604	LOC121879461	uncharacterized LOC121879461
121854288	-2.5511	4.3808	14.066	0.00017646	0.0036864	LOC121854288	uncharacterized LOC121854288
121870908	-2.6984	-0.55921	14.046	0.00017841	0.0037228	LOC121870908	oplophorus-luciferin 2-monooxygenase non-catalytic subunit-like
121862266	-3.8342	-1.191	14.027	0.0001802	0.0037558	LOC121862266	uncharacterized LOC121862266
121853811	-3.8484	-0.69847	14.015	0.00018131	0.0037746	LOC121853811	UDP-xylose and UDP-N-acetylglucosamine transporter-like
121867119	-2.2342	1.8021	13.984	0.00018437	0.0038293	LOC121867119	beta-galactosidase-1-like protein 2
121854768	-1.7833	2.1622	13.98	0.00018481	0.003834	LOC121854768	uncharacterized LOC121854768, transcript variant X2
121867360	2.2481	-1.8043	13.973	0.00018544	0.0038426	LOC121867360	uncharacterized LOC121867360
121874651	-1.9837	3.4812	13.966	0.00018619	0.0038536	LOC121874651	uncharacterized LOC121874651
121865769	-6.8547	-0.485	13.958	0.00018694	0.0038648	LOC121865769	uncharacterized LOC121865769
121860117	-2.5881	4.1894	13.943	0.00018845	0.0038871	LOC121860117	sodium-coupled monocarboxylate transporter 1-like, transcript variant X2
121870184	-2.4122	-0.26627	13.94	0.00018876	0.003889	LOC121870184	macrophage mannose receptor 1-like
121880492	-2.3844	3.6953	13.923	0.00019047	0.0039171	LOC121880492	low-density lipoprotein receptor-like, transcript variant X1
121874598	-1.9064	0.25719	13.902	0.00019258	0.0039495	LOC121874598	dipeptidyl peptidase 1-like
121876874	-4.0072	-0.0066075	13.896	0.00019322	0.0039581	LOC121876874	cytochrome P450 2L1-like
121869798	-2.4706	2.1606	13.89	0.0001938	0.0039609	LOC121869798	uncharacterized LOC121869798
121877421	-5.8776	2.6218	13.775	0.00020611	0.0042077	LOC121877421	hemocyanin A chain-like
121873212	-1.7568	2.5851	13.746	0.00020923	0.0042617	LOC121873212	tripartite motif-containing protein 65-like, transcript variant X2
121875262	-4.5165	-2.1479	13.735	0.00021045	0.0042779	LOC121875262	uncharacterized LOC121875262
121869665	-2.2414	2.1635	13.735	0.0002105	0.0042779	LOC121869665	2-hydroxy-3-oxopropionate reductase-like, transcript variant X3
121871969	-4.3862	-0.33805	13.7	0.0002144	0.0043522	LOC121871969	mucin-2-like
121855370	-2.16	1.3869	13.684	0.00021626	0.004385	LOC121855370	lactosylceramide 4-alpha-galactosyltransferase-like
121880019	-2.2301	2.975	13.677	0.00021707	0.0043867	LOC121880019	organic cation transporter protein-like
121857326	5.0287	-2.7117	13.661	0.00021893	0.0044193	LOC121857326	DNA repair and recombination protein RAD54-like
121870600	-1.7722	1.6366	13.64	0.0002214	0.004459	LOC121870600	sarcosine dehydrogenase, mitochondrial-like, transcript variant X1
121862695	-2.0061	0.97048	13.599	0.00022632	0.0045479	LOC121862695	digestive cysteine proteinase 2-like, transcript variant X1
121869493	-1.7578	1.5237	13.568	0.0002301	0.0046136	LOC121869493	beta-galactosidase-like
121877419	-3.6531	-0.65284	13.553	0.00023194	0.004635	LOC121877419	hemocyanin A chain-like
121875270	-3.0192	-0.80818	13.547	0.00023262	0.0046427	LOC121875270	ETS homologous factor-like
121867643	-2.9929	0.35116	13.542	0.0002333	0.0046465	LOC121867643	integrin beta-PS-like
121873490	-3.22	-1.0124	13.522	0.00023579	0.0046807	LOC121873490	uncharacterized LOC121873490, transcript variant X1
121862116	-1.8574	2.2584	13.519	0.00023611	0.0046818	LOC121862116	uncharacterized LOC121862116, transcript variant X1
121872498	-4.2924	-1.284	13.505	0.00023793	0.0047075	LOC121872498	xanthine dehydrogenase/oxidase-like
121862790	-3.1563	0.013361	13.478	0.00024134	0.0047697	LOC121862790	cytochrome P450 2L1-like
121864123	-2.4749	1.2293	13.465	0.00024312	0.0047837	LOC121864123	histidine-rich glycoprotein-like, transcript variant X2
121872764	-4.5735	-2.7959	13.449	0.00024519	0.0048139	LOC121872764	transcription factor SPT20 homolog
121864737	-3.4795	-1.9739	13.427	0.00024798	0.0048634	LOC121864737	endoglucanase E-4-like
121862267	-2.6034	4.5672	13.399	0.00025173	0.0049315	LOC121862267	uncharacterized LOC121862267, transcript variant X1
121858818	-2.6869	5.1837	13.336	0.00026034	0.0050892	LOC121858818	heme-binding protein 2-like
121872614	-2.9432	4.4021	13.311	0.00026386	0.0051523	LOC121872614	proton-coupled amino acid transporter-like protein pathetic, transcript variant X2
121867642	-2.1432	0.0087393	13.278	0.00026852	0.0052263	LOC121867642	integrin beta-1-like
121874904	-2.0301	3.5554	13.249	0.00027272	0.0053023	LOC121874904	pancreatic triacylglycerol lipase-like, transcript variant X2
121866499	-2.5766	3.3128	13.206	0.00027909	0.0054085	LOC121866499	trypsin-like, transcript variant X2
121861096	-5.2143	-2.3407	13.172	0.00028413	0.0055002	LOC121861096	uncharacterized LOC121861096
121859859	-1.946	1.5265	13.128	0.0002909	0.0056131	LOC121859859	uncharacterized LOC121859859
121856900	-5.2895	-2.3622	13.039	0.00030504	0.0058734	LOC121856900	uncharacterized LOC121856900
121875509	-1.6571	3.3027	13.031	0.00030643	0.0058812	LOC121875509	protein lethal(2)essential for life-like
121870351	-3.3385	-0.19543	13.009	0.00031008	0.0059384	LOC121870351	trypsin-1-like
121869419	-3.3936	-1.2389	13.002	0.00031108	0.0059513	LOC121869419	1-aminocyclopropane-1-carboxylate oxidase-like
121862298	-2.8332	0.71063	12.965	0.00031739	0.0060537	LOC121862298	2-oxoglutarate-Fe(II) type oxidoreductase-like
121868914	2.0975	3.1599	12.943	0.00032108	0.0061101	LOC121868914	crustacyanin-A2 subunit-like
121854345	-2.3647	5.7149	12.938	0.00032197	0.0061204	LOC121854345	uncharacterized LOC121854345
121870457	-2.2769	4.6861	12.926	0.00032401	0.0061528	LOC121870457	lysosomal aspartic protease-like
121875433	-2.3333	1.3439	12.922	0.00032476	0.0061606	LOC121875433	translation initiation factor IF-2-like
121877196	-2.1738	2.1683	12.915	0.00032597	0.006177	LOC121877196	oplophorus-luciferin 2-monooxygenase non-catalytic subunit-like
121854318	-3.0936	3.9711	12.813	0.00034414	0.0064938	LOC121854318	glutamate carboxypeptidase 2-like, transcript variant X1
121872046	-4.4397	0.1768	12.774	0.00035151	0.0066259	LOC121872046	C-type mannose receptor 2-like
121853666	1.9645	-1.3494	12.767	0.00035287	0.0066306	LOC121853666	actin-like
121873190	-2.2113	-0.79088	12.764	0.00035337	0.006633	LOC121873190	zinc finger protein 135-like, transcript variant X2
121866459	-4.0707	-0.68926	12.754	0.0003553	0.0066623	LOC121866459	D-amino-acid oxidase-like, transcript variant X1
121874661	-2.1787	4.145	12.742	0.00035748	0.0066892	LOC121874661	vitelline membrane outer layer protein 1 homolog
121879383	-2.3091	4.1871	12.735	0.00035885	0.0067009	LOC121879383	sphingomyelin phosphodiesterase-like
121857833	-2.3521	1.7536	12.724	0.00036108	0.0067285	LOC121857833	uncharacterized LOC121857833
121876173	-1.9722	1.8292	12.722	0.00036146	0.0067287	LOC121876173	major facilitator superfamily domain-containing protein 8-like, transcript variant X2
121869936	-1.6644	1.9367	12.716	0.00036256	0.0067351	LOC121869936	nicotinamide phosphoribosyltransferase-like
121868608	-3.128	-1.0429	12.683	0.00036901	0.0068479	LOC121868608	tripartite motif containing 13-like, transcript variant X2
121876872	-3.274	-1.3417	12.664	0.00037273	0.0069097	LOC121876872	uncharacterized LOC121876872, transcript variant X1
121863173	-1.6513	1.0863	12.654	0.00037469	0.006939	LOC121863173	clotting factor G beta subunit-like, transcript variant X3
121858027	-2.5673	-1.2426	12.635	0.00037868	0.0070056	LOC121858027	extensin-like
121867695	-2.426	0.56768	12.631	0.00037937	0.0070111	LOC121867695	uncharacterized LOC121867695
121870675	-1.5924	1.5386	12.608	0.00038406	0.0070832	LOC121870675	tubulin beta chain-like, transcript variant X2
121877230	-1.749	1.6582	12.553	0.00039553	0.0072648	LOC121877230	leucine-rich repeat-containing G-protein coupled receptor 4-like
121862162	-1.7642	1.9104	12.55	0.00039611	0.0072681	LOC121862162	ileal sodium/bile acid cotransporter-like
121853182	-1.8747	-0.024671	12.503	0.00040635	0.0074407	LOC121853182	latrophilin-like protein LAT-2
121867371	-2.2765	4.3105	12.5	0.00040697	0.0074444	LOC121867371	uncharacterized LOC121867371
121875905	-1.705	-0.84764	12.396	0.00043019	0.0078379	LOC121875905	uncharacterized LOC121875905
121877688	-2.9385	-1.3263	12.396	0.00043024	0.0078379	LOC121877688	perlucin-like
121863113	-3.0596	3.3131	12.341	0.00044315	0.0080245	LOC121863113	vitelline membrane outer layer protein 1 homolog, transcript variant X1
121876723	-1.9927	1.772	12.334	0.00044486	0.0080398	LOC121876723	multiple coagulation factor deficiency protein 2 homolog
121875779	-5.2761	-2.497	12.334	0.00044489	0.0080398	LOC121875779	phytanoyl-CoA dioxygenase, peroxisomal-like
121854257	-2.0751	0.25784	12.282	0.00045742	0.0082293	LOC121854257	oplophorus-luciferin 2-monooxygenase non-catalytic subunit-like, transcript variant X2
121861436	-1.8889	1.2607	12.246	0.00046633	0.0083767	LOC121861436	calcium-activated chloride channel regulator 2-like
121870362	-2.3911	4.9965	12.231	0.00047012	0.0084363	LOC121870362	uncharacterized LOC121870362
121857025	-1.5956	4.3124	12.227	0.00047113	0.008446	LOC121857025	uncharacterized LOC121857025
121863318	-1.7903	1.1221	12.224	0.00047186	0.0084507	LOC121863318	techylectin-5A-like
121862447	-2.8419	-0.0052038	12.182	0.00048257	0.0086338	LOC121862447	apolipophorins-like
121875507	-1.6232	4.6634	12.128	0.00049675	0.0088537	LOC121875507	uncharacterized LOC121875507
121854322	-2.8998	4.1598	12.124	0.00049766	0.0088596	LOC121854322	uncharacterized LOC121854322, transcript variant X1
121858819	-4.9616	-2.3993	12.11	0.00050147	0.0089187	LOC121858819	uncharacterized LOC121858819
121867936	-2.2362	0.91715	12.091	0.00050664	0.0090017	LOC121867936	vitelline membrane outer layer protein 1 homolog
121869401	-2.4722	0.064678	12.02	0.00052645	0.0093351	LOC121869401	uncharacterized LOC121869401
121862668	-1.7825	1.9048	11.991	0.00053464	0.0094617	LOC121862668	uncharacterized LOC121862668
121872145	-3.2117	-2.2567	11.975	0.00053915	0.009532	LOC121872145	oplophorus-luciferin 2-monooxygenase non-catalytic subunit-like
121874257	-2.2406	2.4809	11.966	0.00054167	0.0095592	LOC121874257	moesin/ezrin/radixin homolog 1-like
121857557	-2.6143	-1.469	11.963	0.00054262	0.0095651	LOC121857557	uncharacterized LOC121857557
121870616	-2.6866	2.9975	11.957	0.0005444	0.0095809	LOC121870616	retinoid-inducible serine carboxypeptidase-like
121861366	-3.2606	2.2925	11.949	0.00054669	0.0096085	LOC121861366	uncharacterized LOC121861366
121856689	-1.7179	3.2346	11.842	0.00057899	0.010146	LOC121856689	four-domain proteases inhibitor-like
121862754	-2.7725	0.79259	11.828	0.0005835	0.010216	LOC121862754	trypsin-1-like
121862402	-2.5914	0.21468	11.82	0.00058603	0.01025	LOC121862402	uncharacterized LOC121862402
121863395	-4.3494	-0.58988	11.794	0.00059425	0.010353	LOC121863395	dipeptidyl peptidase 1-like, transcript variant X1
121880150	-2.5987	1.9918	11.775	0.0006002	0.010437	LOC121880150	poly(U)-specific endoribonuclease-like
121862590	-2.6698	5.0562	11.759	0.00060539	0.010517	LOC121862590	apolipoprotein D-like, transcript variant X1
121875055	-1.7934	0.194	11.751	0.00060814	0.010544	LOC121875055	uncharacterized LOC121875055
121875508	1.5684	1.4831	11.749	0.00060882	0.010545	LOC121875508	uncharacterized LOC121875508
121863867	-1.9109	-1.3779	11.603	0.00065841	0.011298	LOC121863867	uncharacterized LOC121863867
121870193	-2.8819	-1.4329	11.603	0.00065855	0.011298	LOC121870193	luciferin 4-monooxygenase-like
121868195	-2.0463	-0.3063	11.601	0.00065918	0.011298	LOC121868195	uncharacterized LOC121868195, transcript variant X2
121869473	-2.8377	2.9633	11.573	0.00066899	0.011455	LOC121869473	uncharacterized LOC121869473
121864897	-3.8987	-3.0064	11.558	0.00067469	0.011509	LOC121864897	basic salivary proline-rich protein 3-like
121868598	-1.5522	1.7547	11.545	0.00067948	0.011572	LOC121868598	sodium/nucleoside cotransporter 1-like
121858458	-1.6048	4.2875	11.535	0.00068288	0.011604	LOC121858458	C-type mannose receptor 2-like
121869444	-1.5491	-1.1278	11.526	0.00068619	0.011639	LOC121869444	cuticle protein 19.8-like
121873242	-1.6695	-0.90452	11.507	0.0006935	0.01174	LOC121873242	plectin-like, transcript variant X2
121870942	-4.5595	-1.6405	11.501	0.00069555	0.011764	LOC121870942	apical endosomal glycoprotein-like
121874647	-2.8122	0.44788	11.496	0.0006975	0.011786	LOC121874647	uncharacterized LOC121874647
121854256	-2.5749	0.65611	11.468	0.0007082	0.011955	LOC121854256	syntaxin-1A-like, transcript variant X2
121877385	-4.4569	-1.257	11.447	0.00071626	0.01208	LOC121877385	uncharacterized LOC121877385
121862936	-2.743	3.2088	11.44	0.00071878	0.012111	LOC121862936	uncharacterized LOC121862936
121879886	-2.3583	1.1892	11.437	0.00071988	0.012118	LOC121879886	uncharacterized LOC121879886
121864464	-3.2189	0.19245	11.369	0.00074681	0.012525	LOC121864464	cytochrome P450 2L1-like
121860219	-3.7511	-0.84484	11.361	0.00075011	0.012568	LOC121860219	uncharacterized LOC121860219
121865596	-2.3873	1.6006	11.328	0.00076351	0.012769	LOC121865596	facilitated trehalose transporter Tret1-like, transcript variant X1
121853266	3.3213	-1.9603	11.312	0.00076992	0.012852	LOC121853266	kelch-like protein 2
121853204	-1.7617	1.0965	11.249	0.00079685	0.013265	LOC121853204	4-hydroxyphenylpyruvate dioxygenase-like protein
121854325	-2.476	4.3026	11.244	0.00079898	0.013288	LOC121854325	uncharacterized LOC121854325
121862514	-3.4215	-1.5322	11.235	0.00080252	0.013335	LOC121862514	SCAN domain-containing protein 3-like
121871135	-2.8868	-1.2738	11.146	0.00084226	0.013905	LOC121871135	uncharacterized LOC121871135, transcript variant X1
121862810	3.4756	-2.8758	11.097	0.00086474	0.014236	LOC121862810	holotricin-3-like
121857030	-2.6113	5.1146	11.092	0.00086713	0.014263	LOC121857030	digestive cysteine proteinase 1-like, transcript variant X1
121858187	-4.0963	-2.3048	11.072	0.00087633	0.014401	LOC121858187	cytochrome P450 2L1-like
121857999	2.686	-1.4534	11.069	0.00087798	0.014415	LOC121857999	kelch-like protein 28
121877663	-3.6017	-0.27763	11.056	0.00088424	0.014474	LOC121877663	ceramide synthase 6-like
121874932	-1.7347	4.331	11.043	0.00089024	0.014536	LOC121874932	UDP-glycosyltransferase UGT5-like, transcript variant X3
121864758	-1.6499	-1.0983	11.037	0.00089289	0.014566	LOC121864758	uncharacterized LOC121864758
121875500	3.9497	-2.9343	11.032	0.0008955	0.014589	LOC121875500	adenosine receptor A1-like
121872126	4.1535	-2.7001	11.031	0.00089591	0.014589	LOC121872126	uncharacterized LOC121872126
121867987	-2.8978	1.1428	11.025	0.00089904	0.014627	LOC121867987	uncharacterized LOC121867987
121856656	-2.8924	1.4449	11.021	0.00090084	0.014643	LOC121856656	DNA-directed RNA polymerase II subunit RPB1-like
121853118	-2.3778	-0.33099	10.958	0.00093193	0.015121	LOC121853118	uncharacterized LOC121853118
121858578	-2.1527	-0.14831	10.934	0.00094411	0.015304	LOC121858578	alpha-amylase-like
121877422	-3.4467	0.066519	10.886	0.0009692	0.015697	LOC121877422	hemocyanin A chain-like
121866322	4.7474	-2.3469	10.862	0.00098145	0.015877	LOC121866322	histone H2A.Z-specific chaperone CHZ1-like
121860211	-1.7334	3.2223	10.808	0.0010106	0.01628	LOC121860211	keratin-associated protein 19-2-like
121864987	-3.4927	-0.62515	10.79	0.0010204	0.016393	LOC121864987	uncharacterized LOC121864987
121870406	1.6109	-0.32849	10.788	0.0010217	0.016399	LOC121870406	putative nuclease HARBI1
121871933	-3.0348	-2.2253	10.775	0.0010287	0.016483	LOC121871933	uncharacterized LOC121871933
121875812	-2.1693	2.1366	10.753	0.0010411	0.016665	LOC121875812	U-scoloptoxin(16)-Er12a-like
121878847	-1.7086	4.9652	10.709	0.0010659	0.016978	LOC121878847	uncharacterized LOC121878847
121873596	-3.3423	-1.6704	10.676	0.0010855	0.017208	LOC121873596	uncharacterized LOC121873596
121861553	-1.5738	1.5121	10.668	0.0010903	0.017253	LOC121861553	gamma-glutamyl hydrolase A-like
121876797	-2.9225	-1.906	10.664	0.0010926	0.017275	LOC121876797	uncharacterized LOC121876797
121870194	-1.6473	0.434	10.658	0.0010959	0.017312	LOC121870194	uncharacterized LOC121870194, transcript variant X2
121853180	-1.5713	1.6538	10.65	0.0011008	0.01737	LOC121853180	uncharacterized LOC121853180
121861154	-1.7056	-1.2639	10.649	0.0011015	0.01737	LOC121861154	uncharacterized LOC121861154
121858031	-1.8183	1.2269	10.619	0.0011193	0.017618	LOC121858031	uncharacterized LOC121858031
121880199	-3.3185	-1.5543	10.615	0.0011217	0.017641	LOC121880199	ceramide synthase 6-like
121876537	-1.7888	1.0096	10.604	0.0011284	0.017706	LOC121876537	vitelline membrane outer layer protein 1-like, transcript variant X1
121855352	1.9884	0.076392	10.604	0.0011287	0.017706	LOC121855352	kelch-like ECH-associated protein 1A
121868423	-1.7085	4.3563	10.596	0.0011336	0.017767	LOC121868423	glucose-6-phosphate exchanger SLC37A2-like, transcript variant X2
121879478	-2.7835	3.1108	10.589	0.0011373	0.017809	LOC121879478	uncharacterized LOC121879478
121871973	-1.5014	2.7961	10.582	0.0011416	0.017861	LOC121871973	uncharacterized LOC121871973
121855037	-1.6128	2.8947	10.55	0.0011616	0.018158	LOC121855037	uncharacterized LOC121855037
121863883	-1.5291	0.46669	10.517	0.0011827	0.018455	LOC121863883	la-related protein 6-like
121867373	-1.7431	-0.23469	10.494	0.0011975	0.01867	LOC121867373	serine/threonine-protein phosphatase 6 regulatory ankyrin repeat subunit B-like
121879242	-2.9772	-0.61199	10.463	0.0012179	0.018905	LOC121879242	uncharacterized LOC121879242
121879295	-2.8206	-0.19252	10.442	0.0012321	0.019111	LOC121879295	acidic mammalian chitinase-like
121854589	-4.2413	-2.6291	10.431	0.0012392	0.019203	LOC121854589	carbonic anhydrase 2-like
121867671	-3.014	0.17192	10.396	0.001263	0.019505	LOC121867671	integrin beta-6-like
121871636	3.8782	-2.7109	10.358	0.001289	0.019855	LOC121871636	protein starmaker-like
121874479	-2.0825	0.34529	10.337	0.0013037	0.02003	LOC121874479	beta-1,3-galactosyltransferase 5-like
121876460	-2.3855	-1.913	10.325	0.0013126	0.020149	LOC121876460	uncharacterized LOC121876460
121860104	-5.4966	-1.7192	10.274	0.001349	0.020655	LOC121860104	large subunit ribosomal RNA
121872223	-1.8698	2.2361	10.267	0.0013546	0.020724	LOC121872223	procathepsin L-like
121853520	1.7449	10.489	10.261	0.001359	0.020772	LOC121853520	actin-like, transcript variant X2
121859397	-1.6603	-0.073806	10.228	0.0013835	0.02105	LOC121859397	NPC intracellular cholesterol transporter 2-like
121874361	-2.2565	0.0070083	10.227	0.0013842	0.02105	LOC121874361	oplophorus-luciferin 2-monooxygenase non-catalytic subunit-like, transcript variant X2
121876230	-2.3109	5.3573	10.203	0.001402	0.021268	LOC121876230	von Willebrand factor A domain-containing protein 7-like
121877728	-2.87	-0.45792	10.168	0.0014289	0.021638	LOC121877728	uncharacterized LOC121877728
121865917	-2.5576	-0.43176	10.157	0.0014376	0.021751	LOC121865917	C-type mannose receptor 2-like
121864981	-2.8898	0.98272	10.14	0.0014507	0.021913	LOC121864981	uncharacterized LOC121864981
121871738	-1.5029	2.2917	10.092	0.0014895	0.022462	LOC121871738	uncharacterized LOC121871738
121853501	3.8412	-3.1064	10.086	0.0014941	0.022512	LOC121853501	uncharacterized LOC121853501
121874356	-2.4836	1.6692	10.065	0.0015115	0.022679	LOC121874356	oplophorus-luciferin 2-monooxygenase non-catalytic subunit-like
121874118	-2.018	0.86907	10.034	0.0015366	0.022978	LOC121874118	uncharacterized LOC121874118, transcript variant X3
121858441	-2.0909	1.7034	10.016	0.0015515	0.023149	LOC121858441	uncharacterized LOC121858441
121877669	-2.134	1.7753	10.016	0.0015522	0.023149	LOC121877669	solute carrier family 22 member 20-like
121877590	-1.8344	1.0296	9.9876	0.001576	0.02345	LOC121877590	uncharacterized LOC121877590
121863978	1.6293	5.7033	9.9708	0.0015904	0.023626	LOC121863978	uncharacterized LOC121863978
121870210	-3.2783	0.73727	9.9384	0.0016187	0.024026	LOC121870210	von Willebrand factor A domain-containing protein 7-like
121854054	-2.3485	-1.6262	9.8853	0.001666	0.024668	LOC121854054	transmembrane protease serine 13-like
121868913	1.532	6.0858	9.8081	0.0017374	0.025558	LOC121868913	crustacyanin-C1 subunit-like
121875840	1.532	6.0858	9.808	0.0017376	0.025558	LOC121875840	crustacyanin-C1 subunit-like
121864793	-2.5232	-0.43175	9.7981	0.0017469	0.025674	LOC121864793	uncharacterized LOC121864793
121869809	-1.9913	1.1355	9.757	0.0017864	0.026184	LOC121869809	uncharacterized LOC121869809
121859136	-2.3079	1.5741	9.7343	0.0018086	0.026451	LOC121859136	solute carrier family 49 member 4-like, transcript variant X2
121863548	-3.2102	-1.3196	9.7321	0.0018108	0.026462	LOC121863548	cuticle protein AMP1A-like
121866325	4.2245	-1.9402	9.687	0.0018558	0.027075	LOC121866325	calcium-binding acidic-repeat protein-like
121880020	-2.2931	0.49007	9.6837	0.0018591	0.027101	LOC121880020	uncharacterized LOC121880020
121877158	3.801	-2.7663	9.677	0.0018659	0.027157	LOC121877158	maternal embryonic leucine zipper kinase-like
121871991	-3.1298	1.631	9.6674	0.0018757	0.027276	LOC121871991	lipase lipl-5-like
121879346	-1.724	5.1164	9.6263	0.0019181	0.027848	LOC121879346	uncharacterized LOC121879346
121854336	-1.8126	2.2076	9.6105	0.0019347	0.028021	LOC121854336	alpha-L-fucosidase-like
121862896	-2.0534	-1.818	9.5781	0.0019692	0.028497	LOC121862896	tyrosine-protein phosphatase 9-like
121871284	3.8823	-2.7116	9.5737	0.0019738	0.028542	LOC121871284	5.8S ribosomal RNA
121865160	-1.8327	-2.0434	9.5587	0.0019901	0.028716	LOC121865160	uncharacterized LOC121865160, transcript variant X1
121868200	-4.0925	-2.9947	9.5145	0.0020385	0.029335	LOC121868200	proline-rich proteoglycan 2-like
121875406	3.1455	-2.7247	9.4342	0.0021298	0.030551	LOC121875406	uncharacterized LOC121875406
121872136	-2.6708	1.44	9.4054	0.0021635	0.03096	LOC121872136	oplophorus-luciferin 2-monooxygenase non-catalytic subunit-like
121877065	-4.506	-2.4828	9.3464	0.0022342	0.031884	LOC121877065	gamma-butyrobetaine dioxygenase-like, transcript variant X1
121863474	-4.3202	-1.6428	9.3456	0.0022352	0.031884	LOC121863474	probable G-protein coupled receptor B0563.6
121872147	-2.6525	-1.0376	9.3395	0.0022426	0.031965	LOC121872147	oplophorus-luciferin 2-monooxygenase non-catalytic subunit-like
121870243	-1.5985	3.4227	9.244	0.0023627	0.033411	LOC121870243	heat shock 70 kDa protein cognate 4-like
121872286	-1.6464	0.27251	9.2091	0.0024081	0.033946	LOC121872286	uncharacterized LOC121872286
121861641	-2.184	-2.1407	9.1776	0.00245	0.034456	LOC121861641	uncharacterized LOC121861641
121867452	-2.4475	-0.92683	9.1616	0.0024714	0.03473	LOC121867452	uncharacterized LOC121867452
121866023	-3.3917	-1.8754	9.1558	0.0024794	0.034787	LOC121866023	SCAN domain-containing protein 3-like
121873765	3.5673	-3.0782	9.1529	0.0024832	0.034813	LOC121873765	uncharacterized LOC121873765
121873178	2.0207	-1.8261	9.1411	0.0024993	0.034947	LOC121873178	uncharacterized LOC121873178, transcript variant X2
121875165	-6.5257	2.9783	9.1239	0.0025229	0.035233	LOC121875165	uncharacterized LOC121875165
121868631	-2.07	3.6667	9.1219	0.0025257	0.035244	LOC121868631	acidic mammalian chitinase-like
121866324	4.0342	-2.0339	9.0871	0.0025742	0.035727	LOC121866324	protein starmaker-like
121855869	-1.5146	0.846	9.0762	0.0025895	0.035883	LOC121855869	mucin-5AC-like
121876406	-2.7473	1.4698	9.0662	0.0026038	0.036053	LOC121876406	macrophage mannose receptor 1-like
121864724	-3.3587	-2.3916	9.0269	0.0026603	0.036751	LOC121864724	endoglucanase 4-like
121866300	-2.3363	-0.5034	9.0145	0.0026784	0.036949	LOC121866300	uncharacterized LOC121866300
121878550	-1.8774	1.1603	8.9939	0.0027088	0.037334	LOC121878550	mucin-6-like, transcript variant X2
121880137	-3.7493	4.4657	8.9874	0.0027185	0.03744	LOC121880137	hemocyanin C chain-like
121853188	-1.7167	-0.4797	8.9741	0.0027384	0.037655	LOC121853188	sialin-like
121858076	-1.5692	1.6355	8.9642	0.0027532	0.037801	LOC121858076	oplophorus-luciferin 2-monooxygenase non-catalytic subunit-like
121864169	-1.6166	3.9924	8.9401	0.0027898	0.038245	LOC121864169	bumetanide-sensitive sodium-(potassium)-chloride cotransporter-like
121873746	-3.9267	-2.4718	8.9208	0.0028195	0.038593	LOC121873746	luciferin 4-monooxygenase-like
121876846	-2.8046	-1.5887	8.9159	0.002827	0.038667	LOC121876846	uncharacterized LOC121876846, transcript variant X1
121880042	-3.7701	0.47805	8.8738	0.002893	0.039377	LOC121880042	hemocyanin C chain-like
121868999	-1.897	1.0448	8.8731	0.002894	0.039377	LOC121868999	pancreatic lipase-related protein 2-like
121853366	3.1396	-2.1991	8.8729	0.0028943	0.039377	LOC121853366	actin-binding protein IPP-like
121854331	-2.9662	-2.0044	8.8344	0.0029561	0.040126	LOC121854331	uncharacterized LOC121854331
121877354	-1.6911	1.7913	8.8244	0.0029723	0.040279	LOC121877354	lysosomal alpha-mannosidase-like, transcript variant X2
121874317	-1.5778	0.81713	8.8233	0.0029741	0.040279	LOC121874317	cocaine esterase-like
121870940	-2.987	-2.092	8.7896	0.0030295	0.040968	LOC121870940	MAM and LDL-receptor class A domain-containing protein 2-like
121875390	2.3254	-2.2484	8.7879	0.0030323	0.040975	LOC121875390	uncharacterized LOC121875390
121863435	-1.6341	-0.28202	8.7237	0.003141	0.042285	LOC121863435	trypsin-1-like, transcript variant X1
121856502	-2.0685	0.063085	8.7073	0.0031694	0.042571	LOC121856502	uncharacterized LOC121856502
121873491	-2.5389	-0.73248	8.7066	0.0031706	0.042571	LOC121873491	uncharacterized LOC121873491
121879899	-1.9917	-1.0356	8.6471	0.0032759	0.04387	LOC121879899	calcium-activated chloride channel regulator 4-like
121866221	-3.2476	-1.3516	8.5979	0.0033655	0.044769	LOC121866221	polyubiquitin-like
121860968	-1.7231	0.15806	8.5648	0.0034273	0.045423	LOC121860968	glycerophosphocholine cholinephosphodiesterase ENPP6-like, transcript variant X1
121867762	-1.8873	-0.96359	8.5236	0.0035056	0.046256	LOC121867762	uncharacterized LOC121867762
121879694	-1.8847	-1.4729	8.4889	0.0035733	0.047045	LOC121879694	cytochrome c oxidase subunit 7A2, mitochondrial-like
121853119	-1.9172	-1.7598	8.4244	0.0037022	0.048423	LOC121853119	mutS protein homolog 4-like
121873990	2.0256	-1.416	8.4184	0.0037145	0.048548	LOC121873990	uncharacterized LOC121873990
121857798	-3.6584	-3.0064	8.3616	0.0038323	0.049942	LOC121857798	uncharacterized LOC121857798, transcript variant X2
121874473	2.7433	-2.7408	8.3571	0.0038419	0.049995	LOC121874473	mRNA decay activator protein ZFP36L3-like
121853752	-1.4483	7.5194	40.691	1.7832e-10	5.3332e-08	LOC121853752	uncharacterized LOC121853752, transcript variant X8
121871327	-1.4031	5.2428	40.153	2.348e-10	6.6882e-08	LOC121871327	putative methyltransferase DDB_G0268948
121868369	-1.4684	5.1299	39.899	2.6746e-10	7.4992e-08	LOC121868369	iodotyrosine deiodinase 1-like, transcript variant X1
121853632	1.2196	8.5018	38.058	6.8666e-10	1.688e-07	LOC121853632	sequestosome-1-like, transcript variant X1
121853568	-1.381	5.6306	37.814	7.7811e-10	1.8134e-07	LOC121853568	uncharacterized LOC121853568
121871165	-1.2438	3.9235	37.426	9.4949e-10	2.0284e-07	LOC121871165	T-box transcription factor TBX6-like
121869762	-1.2425	6.3912	36.494	1.5314e-09	2.8331e-07	LOC121869762	serine/threonine-protein kinase pim-3-like
121866073	-1.4339	7.6055	36.338	1.6588e-09	3.0068e-07	LOC121866073	sterol carrier protein 2-like
121879007	-1.3887	9.2906	35.472	2.5876e-09	4.3226e-07	LOC121879007	phosphoenolpyruvate carboxykinase, cytosolic [GTP]-like, transcript variant X2
121873674	-1.4754	5.8301	34.805	3.6443e-09	5.7873e-07	LOC121873674	UDP-glycosyltransferase UGT5-like, transcript variant X1
121864940	-1.4919	10.111	33.7	6.4286e-09	9.4559e-07	LOC121864940	glutamine synthetase-like
121879951	1.1296	7.3872	33.475	7.2171e-09	1.0361e-06	LOC121879951	tubulin-folding cofactor B-like
121856847	-1.062	6.0529	32.393	1.2592e-08	1.5685e-06	LOC121856847	sulfotransferase 1A1-like
121858591	-1.1699	5.0788	31.734	1.7677e-08	2.1148e-06	LOC121858591	microtubule-associated protein futsch-like, transcript variant X2
121879006	-1.324	6.3211	31.259	2.2578e-08	2.5972e-06	LOC121879006	phosphoenolpyruvate carboxykinase, cytosolic [GTP]-like
121873486	-1.2531	4.0418	30.99	2.5935e-08	2.9271e-06	LOC121873486	transcription factor SOX-9-like
121856236	1.165	6.1253	30.778	2.8932e-08	3.2048e-06	LOC121856236	fatty acid synthase-like, transcript variant X1
121875339	-1.3709	4.1881	30.46	3.4091e-08	3.6853e-06	LOC121875339	microsomal glutathione S-transferase 3-like, transcript variant X2
121863305	-1.3223	4.3803	29.839	4.695e-08	4.8143e-06	LOC121863305	zinc finger MYND domain-containing protein 10-like
121879184	-1.1748	6.2508	29.796	4.8006e-08	4.8947e-06	LOC121879184	serine/threonine-protein kinase pim-3-like
121854883	-1.4511	3.555	29.532	5.4998e-08	5.4527e-06	LOC121854883	beta-galactosidase-1-like protein 2, transcript variant X1
121871877	-1.3084	4.8174	29.391	5.9154e-08	5.7691e-06	LOC121871877	suppressor protein of bem1/bed5 double mutants-like, transcript variant X2
121878218	-1.4373	3.8841	29.229	6.4317e-08	6.1392e-06	LOC121878218	peptidoglycan-recognition protein SC2-like, transcript variant X1
121872375	-1.1481	5.2274	28.97	7.3526e-08	6.882e-06	LOC121872375	UDP-glucose 4-epimerase-like, transcript variant X1
121858423	-1.387	5.0506	28.967	7.3633e-08	6.882e-06	LOC121858423	uncharacterized LOC121858423
121864150	-0.98933	5.2729	28.811	7.9791e-08	7.3054e-06	LOC121864150	uncharacterized LOC121864150, transcript variant X4
121860504	-1.1511	5.6599	28.796	8.0404e-08	7.3241e-06	LOC121860504	phytanoyl-CoA dioxygenase, peroxisomal-like
121877913	-1.2317	5.7143	28.758	8.2003e-08	7.432e-06	LOC121877913	creatinase-like
121872567	-1.2658	6.1497	28.513	9.3086e-08	8.1502e-06	LOC121872567	prostaglandin reductase 1-like, transcript variant X2
121869044	-1.4832	3.1632	28.357	1.009e-07	8.5871e-06	LOC121869044	ankyrin-1-like, transcript variant X1
121873258	-1.2953	3.7011	28.314	1.0317e-07	8.6973e-06	LOC121873258	N-acetylgalactosamine-6-sulfatase-like
121857392	-1.2661	5.5115	27.927	1.2597e-07	1.0137e-05	LOC121857392	serine/threonine-protein kinase SIK1-like, transcript variant X1
121865174	-1.0578	5.3449	27.903	1.2756e-07	1.0219e-05	LOC121865174	regucalcin-like
121871055	-1.4743	3.0236	27.449	1.6128e-07	1.2474e-05	LOC121871055	glutamate receptor U1-like, transcript variant X2
121876853	-1.3205	4.4832	27.37	1.68e-07	1.2891e-05	LOC121876853	uncharacterized LOC121876853
121854255	-1.2531	6.326	27.308	1.7346e-07	1.3134e-05	LOC121854255	prostaglandin G/H synthase 2-like
121877249	-1.2999	5.3732	27.245	1.7923e-07	1.3401e-05	LOC121877249	dual specificity protein phosphatase 7-like, transcript variant X2
121879054	-1.2787	7.6127	27.194	1.84e-07	1.3644e-05	LOC121879054	angiotensin-converting enzyme-like
121878507	-0.99892	7.2743	27.165	1.8682e-07	1.374e-05	LOC121878507	SIN3-HDAC complex-associated factor-like
121860990	-1.0739	5.931	26.995	2.0394e-07	1.4937e-05	LOC121860990	inositol-trisphosphate 3-kinase B-like, transcript variant X1
121865404	-1.4431	4.2338	26.882	2.1625e-07	1.5522e-05	LOC121865404	uncharacterized LOC121865404
121864671	-1.0749	5.9603	26.801	2.2554e-07	1.5898e-05	LOC121864671	hematopoietic prostaglandin D synthase-like
121874990	-1.0538	4.8696	26.674	2.4087e-07	1.6689e-05	LOC121874990	uncharacterized LOC121874990
121857812	-1.0262	7.6074	26.479	2.6646e-07	1.8044e-05	LOC121857812	V-type proton ATPase subunit B, transcript variant X2
121853319	-1.3663	5.6362	25.678	4.034e-07	2.5311e-05	LOC121853319	early growth response protein 1-like
121858077	-1.1113	7.4147	25.596	4.2088e-07	2.6316e-05	LOC121858077	adenosine kinase 2-like, transcript variant X2
121875178	-1.0503	8.5169	25.549	4.3133e-07	2.6876e-05	LOC121875178	V-type proton ATPase 16 kDa proteolipid subunit
121875251	-1.1604	5.6184	25.487	4.4529e-07	2.746e-05	LOC121875251	uncharacterized LOC121875251
121854452	-1.1356	5.1439	25.472	4.4875e-07	2.7578e-05	LOC121854452	uncharacterized LOC121854452
121867196	-1.2043	6.32	25.392	4.6782e-07	2.8543e-05	LOC121867196	unconventional myosin IC-like
121873740	-1.0201	5.3828	25.369	4.7342e-07	2.8701e-05	LOC121873740	peroxiredoxin-like 2A
121871070	-1.1166	6.1533	25.319	4.8588e-07	2.9357e-05	LOC121871070	G-protein coupled receptor Mth2-like, transcript variant X2
121857049	-1.0154	7.2888	25.012	5.6961e-07	3.3227e-05	LOC121857049	cyclic AMP-responsive element-binding protein 1-like, transcript variant X9
121854354	-1.1327	6.1678	24.474	7.5305e-07	4.2362e-05	LOC121854354	aldehyde dehydrogenase, mitochondrial-like, transcript variant X1
121856583	-1.1199	4.9274	24.391	7.8633e-07	4.4096e-05	LOC121856583	cysteine sulfinic acid decarboxylase-like, transcript variant X2
121858083	-0.95534	6.4909	24.381	7.9048e-07	4.4154e-05	LOC121858083	ribonuclease kappa-B-like
121877873	-0.95186	5.9134	24.377	7.9229e-07	4.4154e-05	LOC121877873	cholinephosphotransferase 1-like, transcript variant X5
121872562	-1.3063	7.979	24.346	8.0511e-07	4.4591e-05	LOC121872562	ferritin subunit-like
121871953	-1.0897	6.5774	24.3	8.2448e-07	4.5524e-05	LOC121871953	V-type proton ATPase 116 kDa subunit a1-like, transcript variant X1
121872642	-1.3411	3.3581	24.293	8.2752e-07	4.5552e-05	LOC121872642	serine/threonine-protein kinase SBK1-like, transcript variant X2
121859532	-1.322	6.7795	24.006	9.6059e-07	5.1456e-05	LOC121859532	la-related protein 6-like
121855408	-0.88608	6.5432	23.819	1.0585e-06	5.5867e-05	LOC121855408	uncharacterized LOC121855408
121859383	-1.4935	5.1692	23.726	1.1104e-06	5.7426e-05	LOC121859383	uncharacterized LOC121859383
121861423	-1.1584	3.9574	23.705	1.1227e-06	5.7728e-05	LOC121861423	serine/threonine-protein phosphatase 2A catalytic subunit beta isoform-like, transcript variant X2
121874585	-1.2742	7.4905	23.636	1.1638e-06	5.9163e-05	LOC121874585	uncharacterized LOC121874585, transcript variant X3
121869069	-1.4346	7.0184	23.596	1.1881e-06	6.0212e-05	LOC121869069	sorbitol dehydrogenase-like, transcript variant X1
121870241	-1.0425	4.148	23.152	1.4967e-06	7.3182e-05	LOC121870241	Usher syndrome type-1G protein homolog
121866922	-1.3008	3.8365	22.829	1.7707e-06	8.406e-05	LOC121866922	adducin-related protein C1289.14-like
121879920	-1.2133	6.4326	22.527	2.0726e-06	9.6107e-05	LOC121879920	D-aspartate oxidase-like
121870678	-0.99755	7.5772	22.502	2.0994e-06	9.6849e-05	LOC121870678	nuclear factor NF-kappa-B p105 subunit-like, transcript variant X4
121867907	-1.1829	3.4508	22.303	2.3287e-06	0.00010447	LOC121867907	uncharacterized LOC121867907, transcript variant X1
121872029	-1.0604	3.3289	22.141	2.5335e-06	0.00011217	LOC121872029	cholesterol 7-desaturase nvd-like
121860272	-1.0414	4.676	21.896	2.878e-06	0.00012415	LOC121860272	triokinase/FMN cyclase-like, transcript variant X1
121856163	-1.4958	5.5193	21.839	2.9646e-06	0.00012751	LOC121856163	uncharacterized LOC121856163, transcript variant X2
121867537	-1.0939	10.581	21.822	2.9913e-06	0.00012811	LOC121867537	ferritin-like
121860943	-1.1035	4.3382	21.804	3.0194e-06	0.00012901	LOC121860943	MIF-like protein mif-2
121870079	-1.3351	4.1197	21.8	3.0266e-06	0.00012901	LOC121870079	probable cytochrome P450 49a1, transcript variant X2
121856588	-1.4041	2.6471	21.322	3.8822e-06	0.00016089	LOC121856588	C-type lectin LmsL-like
121879370	-1.0707	3.7533	21.029	4.5245e-06	0.00018245	LOC121879370	uncharacterized LOC121879370, transcript variant X2
121867986	-1.3702	3.0356	20.929	4.7661e-06	0.00019177	LOC121867986	4-coumarate--CoA ligase 5-like, transcript variant X1
121878534	-0.94548	5.4205	20.852	4.9611e-06	0.00019696	LOC121878534	UNC93-like protein MFSD11, transcript variant X1
121867484	-1.0635	5.9318	20.787	5.1343e-06	0.0002025	LOC121867484	microsomal triglyceride transfer protein large subunit-like, transcript variant X3
121873139	-1.3198	6.7184	20.719	5.3183e-06	0.0002088	LOC121873139	lysosomal protective protein-like
121871447	-1.099	5.0638	20.714	5.3323e-06	0.0002088	LOC121871447	uncharacterized LOC121871447
121867566	-1.4082	3.7052	20.697	5.3813e-06	0.00020947	LOC121867566	monocarboxylate transporter 9-like, transcript variant X4
121872373	-1.4476	4.5864	20.406	6.2639e-06	0.00023916	LOC121872373	phytanoyl-CoA dioxygenase domain-containing protein 1-like, transcript variant X2
121878492	-1.2025	6.062	20.311	6.5813e-06	0.00025008	LOC121878492	uncharacterized LOC121878492
121862308	-1.0048	5.9167	20.308	6.5917e-06	0.00025008	LOC121862308	transcription factor kayak-like, transcript variant X1
121873849	-0.98094	4.4947	20.224	6.8878e-06	0.00026019	LOC121873849	putative neutral ceramidase C
121856153	-0.85108	6.5237	20.201	6.9703e-06	0.0002615	LOC121856153	V-type proton ATPase subunit C-like
121868021	-0.87026	5.46	20.179	7.0522e-06	0.00026365	LOC121868021	carbohydrate sulfotransferase 9-like
121879277	-0.84871	6.1758	19.906	8.1347e-06	0.00029913	LOC121879277	uncharacterized LOC121879277
121874481	-1.3105	3.1521	19.884	8.2271e-06	0.00030102	LOC121874481	uncharacterized LOC121874481
121867969	-1.4832	2.0096	19.834	8.4471e-06	0.00030623	LOC121867969	galactosylgalactosylxylosylprotein 3-beta-glucuronosyltransferase P-like
121855619	-1.1382	3.1305	19.815	8.5297e-06	0.0003086	LOC121855619	glutathione S-transferase Mu 1-like
121866275	-1.0739	6.6239	19.73	8.9209e-06	0.00031889	LOC121866275	methanethiol oxidase-like
121865609	-0.81454	5.6508	19.462	1.0262e-05	0.00035916	LOC121865609	stress-associated endoplasmic reticulum protein 2-like
121853239	-1.2001	2.8071	19.384	1.0692e-05	0.00036897	LOC121853239	serine/arginine repetitive matrix protein 1-like, transcript variant X1
121861028	-1.4509	3.2183	19.349	1.0886e-05	0.00037282	LOC121861028	persulfide dioxygenase ETHE1, mitochondrial-like
121864819	1.479	2.357	19.042	1.2789e-05	0.00042509	LOC121864819	acanthoscurrin-1-like
121878932	-0.97012	8.9134	18.982	1.3193e-05	0.0004376	LOC121878932	adenosylhomocysteinase-like
121864673	-1.2405	3.104	18.962	1.3337e-05	0.00044075	LOC121864673	uncharacterized LOC121864673, transcript variant X1
121858726	-0.93841	5.6328	18.867	1.4017e-05	0.00045735	LOC121858726	mucin-17-like, transcript variant X4
121860951	-1.0466	5.1815	18.733	1.5034e-05	0.00048524	LOC121860951	uncharacterized LOC121860951, transcript variant X1
121871800	-1.0137	7.1031	18.674	1.551e-05	0.000497	LOC121871800	immediate early response gene 5 protein-like
121858720	-1.392	6.6699	18.667	1.5563e-05	0.00049782	LOC121858720	cytochrome P450 4C1-like, transcript variant X5
121856102	-1.1958	4.6113	18.588	1.6226e-05	0.00051446	LOC121856102	sphingomyelin phosphodiesterase-like, transcript variant X3
121855999	-1.0887	5.8827	18.514	1.6871e-05	0.00052651	LOC121855999	melanization protease 1-like, transcript variant X1
121854508	-0.93916	4.2823	18.478	1.7183e-05	0.00053349	LOC121854508	pyrroline-5-carboxylate reductase 3-like, transcript variant X2
121857086	-0.86109	5.2588	18.438	1.7549e-05	0.00054295	LOC121857086	failed axon connections homolog
121858716	-0.78009	6.2437	18.354	1.834e-05	0.00056439	LOC121858716	histone acetyltransferase KAT6A-like, transcript variant X8
121879127	-0.85588	6.4706	18.345	1.843e-05	0.00056533	LOC121879127	uncharacterized LOC121879127, transcript variant X1
121870688	-1.3309	1.7682	18.266	1.9209e-05	0.00058325	LOC121870688	steryl-sulfatase-like, transcript variant X2
121864667	-1.358	5.744	18.172	2.018e-05	0.00060761	LOC121864667	gamma-butyrobetaine dioxygenase-like
121878201	-1.0642	5.0114	18.166	2.0244e-05	0.00060849	LOC121878201	uncharacterized LOC121878201, transcript variant X2
121872180	-0.96362	2.8956	18.137	2.0553e-05	0.00061471	LOC121872180	uncharacterized LOC121872180, transcript variant X1
121876178	-0.98496	3.0923	18.123	2.0712e-05	0.00061842	LOC121876178	uncharacterized LOC121876178, transcript variant X1
121869945	-0.82627	6.1218	18.064	2.1361e-05	0.00063418	LOC121869945	translocon-associated protein subunit alpha-like
121856716	-1.0763	2.3998	18.062	2.1381e-05	0.00063418	LOC121856716	uncharacterized LOC121856716
121865169	-1.2144	2.6738	18.058	2.1429e-05	0.00063455	LOC121865169	uncharacterized LOC121865169, transcript variant X1
121856812	-0.87845	6.4818	18.032	2.1726e-05	0.00064166	LOC121856812	monocarboxylate transporter 14-like, transcript variant X2
121859917	-1.0535	5.3406	18.014	2.1924e-05	0.00064496	LOC121859917	isatin hydrolase-like
121869060	-0.99133	3.1365	17.962	2.2535e-05	0.00065969	LOC121869060	integrin-linked protein kinase homolog pat-4-like, transcript variant X2
121875179	-0.88334	3.8718	17.853	2.3867e-05	0.00069192	LOC121875179	ubiquitin carboxyl-terminal hydrolase 15-like, transcript variant X1
121875555	-0.83901	4.8152	17.546	2.8041e-05	0.00080127	LOC121875555	serine/arginine repetitive matrix protein 2-like, transcript variant X2
121860995	-0.80615	5.0892	17.414	3.006e-05	0.00084683	LOC121860995	uncharacterized LOC121860995, transcript variant X4
121873197	-1.2227	2.9435	17.404	3.0215e-05	0.00084987	LOC121873197	alpha-(1,3)-fucosyltransferase C-like, transcript variant X3
121878787	-1.0795	3.9869	17.293	3.2036e-05	0.00088688	LOC121878787	uncharacterized LOC121878787, transcript variant X1
121871540	-1.486	0.84206	17.291	3.2075e-05	0.00088688	LOC121871540	beta-1,4-galactosyltransferase galt-1-like, transcript variant X3
121872791	-0.8939	4.1073	17.279	3.2277e-05	0.00089044	LOC121872791	basic salivary proline-rich protein 2-like
121865490	-0.78231	7.0113	17.265	3.2507e-05	0.00089332	LOC121865490	V-type proton ATPase subunit H-like
121868892	-0.76059	6.4136	17.245	3.2851e-05	0.0009014	LOC121868892	C-Maf-inducing protein-like, transcript variant X3
121862884	-1.4154	0.46236	17.204	3.3564e-05	0.00091675	LOC121862884	uncharacterized LOC121862884
121861268	-0.86107	7.5484	17.182	3.3956e-05	0.00092604	LOC121861268	neuroparsin-A-like
121876620	-1.4079	4.7019	17.176	3.4064e-05	0.00092759	LOC121876620	alkaline phosphatase-like
121862194	-1.1481	3.9388	17.101	3.5451e-05	0.00096244	LOC121862194	alpha-tocopherol transfer protein-like, transcript variant X1
121854545	-1.0446	6.5592	17.068	3.6068e-05	0.0009777	LOC121854545	uncharacterized LOC121854545
121869062	-1.1245	5.7502	17.045	3.65e-05	0.00098793	LOC121869062	purine nucleoside phosphorylase-like, transcript variant X1
121872669	-0.78034	5.1001	17.038	3.6648e-05	0.00099044	LOC121872669	XK-related protein 7-like, transcript variant X1
121866677	-1.0332	10.697	17.034	3.6712e-05	0.00099068	LOC121866677	MAP kinase-interacting serine/threonine-protein kinase 1-like
121859278	-1.0115	4.702	16.971	3.7956e-05	0.0010197	LOC121859278	solute carrier family 49 member 4 homolog, transcript variant X1
121868225	-1.2699	1.8009	16.893	3.9537e-05	0.0010558	LOC121868225	lambda-crystallin homolog
121860703	-0.97816	8.6066	16.832	4.0829e-05	0.0010822	LOC121860703	sodium-dependent phosphate transporter 1-B-like, transcript variant X2
121874102	-0.7932	7.8831	16.823	4.1026e-05	0.0010852	LOC121874102	V-type proton ATPase catalytic subunit A-like
121867040	-0.9739	4.2497	16.822	4.1063e-05	0.0010852	LOC121867040	RING finger protein nhl-1-like, transcript variant X5
121863595	-1.1776	7.0666	16.809	4.1339e-05	0.0010893	LOC121863595	basigin-like, transcript variant X1
121870602	-1.3787	5.6912	16.757	4.2486e-05	0.0011146	LOC121870602	sarcosine dehydrogenase, mitochondrial-like
121870167	-1.2061	2.4911	16.742	4.283e-05	0.0011204	LOC121870167	serine/threonine-protein phosphatase 6 regulatory ankyrin repeat subunit C-like
121867847	-0.74834	6.6036	16.717	4.3385e-05	0.0011333	LOC121867847	phosphatidylcholine:ceramide cholinephosphotransferase 2-like, transcript variant X1
121867755	-0.77841	7.8897	16.631	4.5414e-05	0.0011777	LOC121867755	V-type proton ATPase subunit E-like
121867553	-0.84316	6.5528	16.628	4.5483e-05	0.0011778	LOC121867553	coagulation factor X-like, transcript variant X2
121854160	-0.94553	4.1814	16.571	4.6851e-05	0.0012062	LOC121854160	protein dimmed-like
121861329	-1.1405	3.1832	16.538	4.7673e-05	0.0012239	LOC121861329	lethal(2)neighbour of Tid protein-like, transcript variant X1
121853176	-1.3781	3.6612	16.497	4.8722e-05	0.0012472	LOC121853176	legumain-like
121856501	-1.3629	1.9439	16.486	4.9006e-05	0.0012527	LOC121856501	L-proline trans-4-hydroxylase-like, transcript variant X2
121860271	-0.89998	4.9893	16.43	5.0481e-05	0.0012801	LOC121860271	PI-actitoxin-Axm2b-like
121860098	-0.85821	7.5681	16.422	5.0684e-05	0.0012828	LOC121860098	uncharacterized LOC121860098, transcript variant X2
121862407	-1.1679	3.8651	16.313	5.3702e-05	0.0013522	LOC121862407	long-chain-fatty-acid--CoA ligase 4-like, transcript variant X2
121876870	-1.4584	2.1259	16.312	5.3724e-05	0.0013522	LOC121876870	tripartite motif-containing protein 75-like
121859498	-1.2966	4.1725	16.224	5.6281e-05	0.0014066	LOC121859498	soma ferritin-like, transcript variant X1
121878874	-0.73617	6.6627	16.157	5.8314e-05	0.0014514	LOC121878874	probable 28S ribosomal protein S26, mitochondrial
121855532	-1.43	1.9246	16.137	5.8928e-05	0.0014606	LOC121855532	leucine-rich repeat-containing G-protein coupled receptor 4-like
121854088	-0.96456	3.9174	16.09	6.0408e-05	0.0014931	LOC121854088	major facilitator superfamily domain-containing protein 9-like, transcript variant X2
121878864	-0.81621	6.7321	16.01	6.3024e-05	0.001545	LOC121878864	probable cytochrome P450 49a1
121867990	-1.0514	5.3085	15.977	6.4124e-05	0.0015664	LOC121867990	acid phosphatase type 7-like, transcript variant X1
121860786	-1.1945	2.6958	15.94	6.537e-05	0.0015828	LOC121860786	early growth response protein 4-like, transcript variant X1
121865257	-0.82545	8.5122	15.928	6.5793e-05	0.001589	LOC121865257	protein Tob1-like, transcript variant X1
121856387	0.8194	5.1975	15.818	6.9752e-05	0.0016689	LOC121856387	uncharacterized LOC121856387, transcript variant X2
121860461	-0.87245	3.5368	15.775	7.1346e-05	0.0016968	LOC121860461	rhomboid-related protein 1-like, transcript variant X2
121868028	-0.79251	5.8379	15.698	7.4286e-05	0.0017473	LOC121868028	semaphorin-5B-like, transcript variant X5
121877818	-0.85836	5.5574	15.698	7.4293e-05	0.0017473	LOC121877818	androgen-dependent TFPI-regulating protein-like, transcript variant X5
121863306	-0.79546	5.011	15.638	7.6694e-05	0.0017948	LOC121863306	protein VAPYRIN-like, transcript variant X1
121860350	-1.0901	5.0013	15.626	7.7183e-05	0.0018011	LOC121860350	uncharacterized LOC121860350
121868957	-0.81391	6.9383	15.623	7.7308e-05	0.0018017	LOC121868957	V-type proton ATPase subunit e 2-like
121880200	-1.395	5.5405	15.584	7.8928e-05	0.0018323	LOC121880200	uncharacterized LOC121880200
121875970	-1.0567	2.3551	15.562	7.9839e-05	0.0018427	LOC121875970	uncharacterized LOC121875970, transcript variant X1
121870598	-0.83188	3.9294	15.534	8.1028e-05	0.0018594	LOC121870598	alpha-tocopherol transfer protein-like, transcript variant X1
121855628	-0.90223	4.9211	15.501	8.245e-05	0.0018855	LOC121855628	uncharacterized LOC121855628
121868749	-0.74789	5.332	15.473	8.3687e-05	0.0019106	LOC121868749	frizzled-4-like
121857787	0.98047	3.2896	15.374	8.821e-05	0.0019987	LOC121857787	uncharacterized LOC121857787
121860676	-1.0703	3.4275	15.365	8.8637e-05	0.0020058	LOC121860676	monocarboxylate transporter 13-like
121854577	-1.1765	2.5625	15.229	9.5247e-05	0.0021472	LOC121854577	UNC93-like protein
121874595	-0.94806	4.7553	15.224	9.5486e-05	0.0021499	LOC121874595	protein amalgam-like, transcript variant X2
121871091	-0.95466	10.25	15.147	9.9465e-05	0.0022256	LOC121871091	uncharacterized LOC121871091, transcript variant X2
121855180	-1.1867	3.4814	15.137	9.9991e-05	0.0022345	LOC121855180	uncharacterized protein PB18E9.04c-like
121867683	-1.3166	10.302	15.134	0.00010016	0.0022355	LOC121867683	S-adenosylmethionine synthase-like, transcript variant X2
121870974	-0.85539	5.0145	15.068	0.00010373	0.0023065	LOC121870974	uncharacterized LOC121870974, transcript variant X2
121875114	-0.81157	3.6904	14.864	0.00011553	0.0025406	LOC121875114	mitochondrial amidoxime reducing component 2-like
121854396	-0.71785	7.4418	14.783	0.00012064	0.0026434	LOC121854396	renin receptor-like
121867288	-1.1803	4.5863	14.762	0.000122	0.0026699	LOC121867288	uncharacterized LOC121867288
121872062	-0.80895	6.543	14.758	0.00012222	0.0026714	LOC121872062	dual specificity protein phosphatase 10-like
121869595	-0.85765	3.8547	14.678	0.0001275	0.0027666	LOC121869595	ubiquitin carboxyl-terminal hydrolase 15-like, transcript variant X4
121880047	-0.6961	6.2491	14.647	0.00012965	0.0027963	LOC121880047	isocitrate dehydrogenase [NADP] cytoplasmic-like
121856668	-1.0911	6.6072	14.512	0.0001393	0.0029938	LOC121856668	keratin, type I cytoskeletal 9-like, transcript variant X1
121860436	-1.1926	1.7356	14.469	0.00014246	0.0030542	LOC121860436	flocculation protein FLO11-like
121869043	-0.95962	4.3054	14.428	0.00014561	0.0031144	LOC121869043	ubiquitin carboxyl-terminal hydrolase 2-like, transcript variant X2
121853253	-1.1845	4.5801	14.37	0.00015021	0.0032051	LOC121853253	microsomal glutathione S-transferase 1-like
121856268	-1.1689	3.4377	14.364	0.00015062	0.0032062	LOC121856268	importin subunit alpha-6-like
121864774	-0.91562	4.0183	14.343	0.00015237	0.0032358	LOC121864774	uncharacterized LOC121864774, transcript variant X5
121874145	-1.406	2.6148	14.308	0.00015524	0.003289	LOC121874145	uncharacterized LOC121874145, transcript variant X4
121878335	-0.76082	8.08	14.3	0.0001559	0.003299	LOC121878335	peroxisomal N(1)-acetyl-spermine/spermidine oxidase-like, transcript variant X4
121876596	0.84311	6.7421	14.139	0.0001698	0.003568	LOC121876596	ribonucleoside-diphosphate reductase subunit M2 B-like
121878472	-0.96286	4.6315	14.011	0.00018172	0.0037787	LOC121878472	uncharacterized LOC121878472
121877479	-1.2098	2.4661	13.948	0.00018799	0.0038819	LOC121877479	uncharacterized LOC121877479
121875340	-1.0381	5.6498	13.922	0.00019056	0.0039171	LOC121875340	serine protease inhibitor 88Ea-like
121866355	1.3121	1.3688	13.909	0.00019186	0.0039393	LOC121866355	uncharacterized LOC121866355, transcript variant X2
121872560	-0.83533	7.5981	13.89	0.00019378	0.0039609	LOC121872560	uncharacterized LOC121872560, transcript variant X1
121853952	-1.0666	3.1184	13.763	0.0002074	0.0042292	LOC121853952	uncharacterized LOC121853952
121878215	-0.80709	7.9073	13.678	0.00021704	0.0043867	LOC121878215	uncharacterized LOC121878215
121872734	-1.1768	1.5946	13.677	0.00021707	0.0043867	LOC121872734	potassium channel subfamily K member 16-like, transcript variant X1
121863101	-0.70082	5.5542	13.658	0.0002193	0.0044218	LOC121863101	microtubule-associated serine/threonine-protein kinase 2-like
121857308	-0.72827	5.1183	13.601	0.00022612	0.0045479	LOC121857308	gastrula zinc finger protein XlCGF8.2DB-like, transcript variant X7
121878306	-1.1733	4.8805	13.587	0.0002278	0.0045726	LOC121878306	sphingosine-1-phosphate lyase 1-like
121853518	-0.70217	5.8917	13.555	0.00023163	0.004635	LOC121853518	PDZ domain-containing protein GIPC1-like
121872912	-0.7476	5.1523	13.555	0.0002317	0.004635	LOC121872912	uncharacterized LOC121872912
121855736	-1.0172	3.0336	13.546	0.00023284	0.0046427	LOC121855736	uncharacterized LOC121855736, transcript variant X3
121874314	-0.93246	6.1254	13.535	0.0002341	0.0046574	LOC121874314	ETS domain-containing protein Elk-3-like, transcript variant X4
121873249	-0.82626	4.7863	13.523	0.00023567	0.0046807	LOC121873249	protein unzipped-like
121862131	-1.363	4.7364	13.516	0.00023654	0.0046851	LOC121862131	thiamine transporter 1-like, transcript variant X1
121853159	-1.3369	2.0051	13.473	0.000242	0.0047774	LOC121853159	cytochrome P450 2L1-like
121863107	-1.0729	2.4316	13.467	0.00024273	0.0047837	LOC121863107	uncharacterized LOC121863107
121871078	-0.84354	3.0863	13.466	0.00024288	0.0047837	LOC121871078	alpha-1,6-mannosyl-glycoprotein 2-beta-N-acetylglucosaminyltransferase-like, transcript variant X1
121853420	-0.88322	4.5435	13.453	0.00024464	0.0048084	LOC121853420	keratin-associated protein 5-4-like, transcript variant X2
121866480	-1.0762	1.8319	13.351	0.00025828	0.0050543	LOC121866480	heparan-alpha-glucosaminide N-acetyltransferase-like
121871435	-1.1394	3.3337	13.301	0.00026525	0.0051739	LOC121871435	uncharacterized LOC121871435, transcript variant X1
121857707	-1.0453	5.5021	13.279	0.00026846	0.0052263	LOC121857707	phenoloxidase-activating factor 3-like
121870802	-0.84424	3.2992	13.242	0.00027379	0.0053173	LOC121870802	uncharacterized LOC121870802
121862916	-0.91915	7.4019	13.239	0.00027422	0.0053199	LOC121862916	solute carrier family 22 member 6-A-like, transcript variant X2
121877309	-0.70296	5.8136	13.154	0.00028692	0.0055468	LOC121877309	motile sperm domain-containing protein 1-like, transcript variant X2
121855244	-1.2742	1.8419	13.152	0.00028715	0.0055468	LOC121855244	SCAN domain-containing protein 3-like
121876805	-0.87095	4.4951	13.052	0.00030294	0.0058391	LOC121876805	uncharacterized LOC121876805
121874237	1.3235	3.7365	13.033	0.00030607	0.0058812	LOC121874237	solute carrier family 23 member 1-like, transcript variant X2
121865930	-1.1619	0.81684	13.031	0.00030636	0.0058812	LOC121865930	uncharacterized LOC121865930
121877276	-1.2142	4.1651	13.009	0.00031002	0.0059384	LOC121877276	uncharacterized LOC121877276
121869109	-0.94496	3.5017	12.974	0.00031588	0.0060367	LOC121869109	ankyrin repeat domain-containing protein 29-like
121865515	-0.9572	2.8285	12.965	0.00031744	0.0060537	LOC121865515	uncharacterized LOC121865515
121860719	-0.77903	4.2957	12.96	0.00031819	0.0060615	LOC121860719	beta-mannosidase-like, transcript variant X4
121860125	-0.68341	7.062	12.9	0.00032861	0.0062203	LOC121860125	NADH-cytochrome b5 reductase 2-like, transcript variant X2
121859528	1.4705	0.59522	12.896	0.00032925	0.0062259	LOC121859528	uncharacterized LOC121859528
121864745	1.3627	1.6252	12.861	0.00033558	0.006339	LOC121864745	E3 ubiquitin-protein ligase TRIM32-like
121856022	-0.87417	6.1991	12.77	0.00035228	0.0066306	LOC121856022	protein CREBRF homolog, transcript variant X2
121864486	-1.3298	-0.24091	12.767	0.00035273	0.0066306	LOC121864486	uncharacterized LOC121864486
121879680	-0.71643	5.1177	12.743	0.00035737	0.0066892	LOC121879680	mucolipin-3-like, transcript variant X6
121868612	-0.73849	5.1155	12.74	0.00035793	0.0066906	LOC121868612	vascular endothelial growth factor receptor 1-like, transcript variant X6
121877067	-0.82226	6.0135	12.727	0.00036042	0.0067233	LOC121877067	gamma-butyrobetaine dioxygenase-like
121867758	-0.90775	4.0351	12.717	0.00036244	0.0067351	LOC121867758	beta-galactosidase-like, transcript variant X2
121855997	-1.0144	3.5488	12.623	0.00038098	0.0070336	LOC121855997	melanization protease 1-like
121861050	-0.71676	4.8889	12.595	0.00038674	0.0071252	LOC121861050	persulfide dioxygenase ETHE1, mitochondrial-like
121853798	-0.64319	6.2626	12.568	0.00039242	0.0072226	LOC121853798	UDP-xylose and UDP-N-acetylglucosamine transporter-like, transcript variant X2
121863512	-0.76049	5.6139	12.56	0.00039419	0.0072476	LOC121863512	wee1-like protein kinase 2
121856580	-0.73888	4.3206	12.523	0.00040201	0.0073689	LOC121856580	WD repeat domain-containing protein 83-like
121855396	-1.004	3.3749	12.445	0.00041919	0.0076603	LOC121855396	guanine deaminase-like
121873763	-0.89732	2.7048	12.419	0.00042488	0.0077563	LOC121873763	uncharacterized LOC121873763
121870615	-1.1622	2.9473	12.394	0.00043066	0.0078379	LOC121870615	solute carrier family 10 member 6-like, transcript variant X3
121872876	-1.486	4.3389	12.375	0.00043523	0.007913	LOC121872876	calcium-activated chloride channel regulator 1-like, transcript variant X2
121863108	-0.78273	5.587	12.372	0.00043579	0.0079153	LOC121863108	high affinity copper uptake protein 1-like
121873681	-1.1539	2.4134	12.364	0.00043781	0.0079438	LOC121873681	carbohydrate sulfotransferase 5-like
121858026	-0.95811	5.0557	12.354	0.00044014	0.007978	LOC121858026	dual specificity protein phosphatase 18-like
121872887	-1.2572	4.5342	12.315	0.00044942	0.0081136	LOC121872887	superoxide dismutase [Cu-Zn]-like
121863066	-0.67914	6.4505	12.297	0.00045369	0.0081824	LOC121863066	tyrosine-protein phosphatase non-receptor type 4-like, transcript variant X1
121879501	-0.73964	7.7502	12.294	0.00045453	0.0081893	LOC121879501	band 3 anion transport protein-like, transcript variant X1
121855252	-0.91961	4.133	12.281	0.00045767	0.0082293	LOC121855252	histone PARylation factor 1-like
121879887	-1.4592	0.55799	12.147	0.00049155	0.0087857	LOC121879887	uncharacterized LOC121879887
121853542	-0.86045	6.936	12.141	0.00049314	0.0088053	LOC121853542	cysteine dioxygenase type 1-like
121855109	-0.75117	4.4414	12.128	0.00049683	0.0088537	LOC121855109	uncharacterized LOC121855109, transcript variant X1
121866244	-0.64267	7.1989	12.068	0.00051289	0.0091036	LOC121866244	peroxiredoxin-6-like
121865749	-0.85548	3.2599	11.996	0.0005331	0.0094437	LOC121865749	uncharacterized LOC121865749, transcript variant X1
121863280	-0.71976	4.0814	11.966	0.00054175	0.0095592	LOC121863280	probable cyclin-dependent serine/threonine-protein kinase DDB_G0292550
121869537	-0.65052	5.5762	11.956	0.00054458	0.0095809	LOC121869537	copper transport protein ATOX1-like
121875388	-1.2937	1.2605	11.864	0.00057217	0.010046	LOC121875388	beta-1,4-glucuronyltransferase 1-like
121858729	-0.86056	3.0832	11.852	0.00057611	0.010106	LOC121858729	uncharacterized LOC121858729
121877723	-1.2443	3.5614	11.816	0.00058732	0.010262	LOC121877723	(Lyso)-N-acylphosphatidylethanolamine lipase-like, transcript variant X2
121858032	-1.1586	1.482	11.802	0.00059168	0.010322	LOC121858032	uncharacterized LOC121858032, transcript variant X3
121861217	-0.99223	2.2651	11.801	0.0005919	0.010322	LOC121861217	magnesium transporter NIPA2-like
121863230	-0.9506	3.594	11.788	0.000596	0.010374	LOC121863230	venom protease-like
121856066	-0.95332	3.7455	11.754	0.00060705	0.010535	LOC121856066	uncharacterized LOC121856066
121880078	-0.7243	5.0416	11.747	0.00060935	0.010545	LOC121880078	protein spaetzle-like, transcript variant X2
121854764	-0.99672	1.1405	11.73	0.00061503	0.010619	LOC121854764	uncharacterized LOC121854764, transcript variant X1
121871456	0.74905	4.2094	11.73	0.00061515	0.010619	LOC121871456	exonuclease 3'-5' domain-containing protein 2-like
121872744	-0.70531	4.9638	11.729	0.00061543	0.010619	LOC121872744	carbonyl reductase [NADPH] 3-like
121856271	-0.75313	6.3736	11.722	0.00061763	0.010647	LOC121856271	aldehyde dehydrogenase, dimeric NADP-preferring-like, transcript variant X7
121867780	-1.4389	3.1067	11.643	0.00064428	0.011096	LOC121867780	2-hydroxy-3-oxopropionate reductase-like
121866942	-0.73553	4.3484	11.638	0.00064626	0.011119	LOC121866942	ethanolaminephosphotransferase 1-like, transcript variant X2
121853611	-1.1271	5.7248	11.634	0.00064756	0.011131	LOC121853611	uncharacterized LOC121853611
121863807	0.73889	3.9318	11.57	0.00067021	0.011465	LOC121863807	uncharacterized LOC121863807, transcript variant X2
121878671	-0.8145	6.6148	11.568	0.00067098	0.011467	LOC121878671	SEC14-like protein 2
121868020	-0.94613	6.6054	11.559	0.00067412	0.011509	LOC121868020	cilia- and flagella-associated protein 97-like
121871701	-0.65699	7.0625	11.544	0.00067967	0.011572	LOC121871701	peptidylglycine alpha-hydroxylating monooxygenase-like, transcript variant X2
121853167	-0.76554	4.9058	11.541	0.00068068	0.011578	LOC121853167	potassium channel subfamily K member 16-like, transcript variant X4
121866979	1.1498	0.65582	11.53	0.0006848	0.011626	LOC121866979	uncharacterized LOC121866979
121879005	-1.3197	3.7963	11.519	0.00068896	0.011675	LOC121879005	phosphoenolpyruvate carboxykinase, cytosolic [GTP]-like
121861417	-0.67507	4.0669	11.414	0.00072884	0.012258	LOC121861417	ras-related and estrogen-regulated growth inhibitor-like protein, transcript variant X2
121871915	-0.66892	6.9527	11.412	0.00072985	0.012263	LOC121871915	V-type proton ATPase subunit G-like
121865004	0.73775	4.0187	11.395	0.00073627	0.012359	LOC121865004	hemicentin-2-like, transcript variant X4
121870022	-1.3512	2.9616	11.339	0.00075877	0.012702	LOC121870022	phosphomethylethanolamine N-methyltransferase-like, transcript variant X3
121858537	-0.94504	3.749	11.316	0.00076838	0.012839	LOC121858537	dynamin-binding protein-like
121868754	-0.68517	4.3427	11.3	0.00077518	0.012928	LOC121868754	bone morphogenetic protein 10-like, transcript variant X1
121857752	-0.84555	4.5285	11.256	0.00079383	0.013227	LOC121857752	polycystin-2-like, transcript variant X1
121853212	-0.66383	4.7991	11.21	0.00081346	0.013504	LOC121853212	retinol dehydrogenase 12-like, transcript variant X2
121879516	-1.0268	3.274	11.192	0.00082141	0.013623	LOC121879516	creatinase-like
121864075	-1.4939	2.3919	11.187	0.00082365	0.013645	LOC121864075	serine/threonine-protein phosphatase 6 regulatory ankyrin repeat subunit A-like, transcript variant X1
121863851	-0.59291	6.9659	11.186	0.00082428	0.013645	LOC121863851	V-type proton ATPase subunit d 1-like
121864822	0.94164	4.6458	11.163	0.00083445	0.013801	LOC121864822	uncharacterized LOC121864822
121875618	-0.71883	4.2973	11.15	0.00084035	0.013886	LOC121875618	cytochrome P450 2L1-like, transcript variant X3
121868722	-0.65578	6.3665	11.122	0.00085303	0.014069	LOC121868722	5-aminolevulinate synthase, erythroid-specific, mitochondrial-like, transcript variant X4
121857117	1.2088	8.052	11.112	0.00085761	0.014132	LOC121857117	lamprin 1.8-10-like
121872648	-0.65848	4.8697	11.063	0.00088053	0.014444	LOC121872648	peroxisomal carnitine O-octanoyltransferase-like, transcript variant X2
121879512	-1.0593	3.1026	11.057	0.00088354	0.014474	LOC121879512	anion exchange protein 2-like
121854042	-0.63192	6.0833	11.054	0.00088482	0.014474	LOC121854042	N-myc protein-like, transcript variant X2
121875743	-0.63467	5.2556	11.049	0.00088755	0.014505	LOC121875743	protein PRY1-like, transcript variant X10
121857638	-0.71599	6.124	10.982	0.00091978	0.014937	LOC121857638	inactive selenide, water dikinase-like protein
121861546	-0.76352	4.5087	10.861	0.00098207	0.015877	LOC121861546	sodium- and chloride-dependent neutral and basic amino acid transporter B(0+)-like
121862666	-1.2433	5.45	10.853	0.00098657	0.015922	LOC121862666	uncharacterized LOC121862666
121867050	0.84741	4.1676	10.853	0.00098662	0.015922	LOC121867050	uncharacterized LOC121867050, transcript variant X2
121878223	1.0943	2.266	10.817	0.0010057	0.016214	LOC121878223	antileukoproteinase-like
121854913	-0.86671	3.3414	10.806	0.0010118	0.016284	LOC121854913	gamma-butyrobetaine dioxygenase-like, transcript variant X1
121869014	-1.1073	1.8881	10.802	0.0010137	0.0163	LOC121869014	uncharacterized LOC121869014
121872508	-1.0713	4.2505	10.78	0.0010262	0.016457	LOC121872508	UDP-glycosyltransferase UGT5-like
121866188	-0.6597	5.3083	10.736	0.0010509	0.016808	LOC121866188	natural resistance-associated macrophage protein 2-like, transcript variant X6
121867453	-0.85553	2.9039	10.73	0.0010541	0.016843	LOC121867453	uncharacterized LOC121867453
121866262	-0.64147	7.0781	10.717	0.0010618	0.016952	LOC121866262	DNA-binding protein D-ETS-4-like, transcript variant X1
121879643	-0.78333	3.6038	10.71	0.0010653	0.016978	LOC121879643	luciferin sulfotransferase-like
121877073	1.1816	2.509	10.708	0.0010669	0.016978	LOC121877073	abscisic acid and environmental stress-inducible protein-like
121855377	1.1816	2.509	10.707	0.0010672	0.016978	LOC121855377	abscisic acid and environmental stress-inducible protein-like
121871160	0.69595	3.2536	10.704	0.0010689	0.016989	LOC121871160	organic cation transporter 1-like, transcript variant X2
121860373	-0.59104	5.0784	10.686	0.0010797	0.017146	LOC121860373	nuclear receptor subfamily 2 group F member 1-B-like
121879109	-1.4802	2.5072	10.684	0.0010807	0.017146	LOC121879109	lysM and putative peptidoglycan-binding domain-containing protein 2-like
121860934	-1.2579	0.19536	10.673	0.0010871	0.017218	LOC121860934	chitinase-3-like protein 1
121866535	-1.1446	2.2227	10.645	0.0011034	0.017384	LOC121866535	uncharacterized LOC121866535
121853880	0.77762	3.552	10.61	0.001125	0.017679	LOC121853880	uncharacterized LOC121853880
121865895	1.1425	0.80214	10.527	0.0011767	0.018377	LOC121865895	SET domain-containing protein SmydA-8-like, transcript variant X2
121872723	-1.024	2.8422	10.483	0.0012045	0.018753	LOC121872723	uncharacterized LOC121872723
121860188	-1.0857	4.8762	10.483	0.0012049	0.018753	LOC121860188	anti-lipopolysaccharide factor-like
121874650	-0.97847	2.329	10.476	0.0012093	0.018806	LOC121874650	thymidylate kinase-like, transcript variant X2
121864821	0.80671	5.8067	10.464	0.0012172	0.018905	LOC121864821	uncharacterized LOC121864821
121856180	1.3288	1.2374	10.428	0.0012415	0.019209	LOC121856180	cartilage oligomeric matrix protein-like, transcript variant X2
121857772	-0.85667	3.121	10.427	0.0012417	0.019209	LOC121857772	uncharacterized LOC121857772
121870260	-1.3307	0.29069	10.399	0.0012611	0.019492	LOC121870260	WAP four-disulfide core domain protein 2-like, transcript variant X2
121861629	-0.66904	4.1294	10.385	0.0012706	0.019606	LOC121861629	phospholipid scramblase 1-like, transcript variant X2
121879452	-0.9077	3.9903	10.376	0.001277	0.019687	LOC121879452	WSC domain-containing protein 1-like
121869952	-0.68127	5.4289	10.352	0.0012937	0.01991	LOC121869952	polyamine-transporting ATPase 13A2-like, transcript variant X1
121873670	0.68759	4.4785	10.344	0.0012989	0.019973	LOC121873670	uncharacterized LOC121873670, transcript variant X1
121859271	-0.77486	3.2366	10.3	0.0013304	0.020405	LOC121859271	XK-related protein 6-like, transcript variant X6
121862789	-0.98445	2.7814	10.287	0.0013396	0.020528	LOC121862789	4-coumarate--CoA ligase-like 5
121862135	0.68525	7.3694	10.254	0.0013641	0.020833	LOC121862135	uncharacterized LOC121862135, transcript variant X2
121853499	-1.2528	1.9999	10.251	0.0013664	0.02085	LOC121853499	ATP-binding cassette sub-family D member 2-like
121864971	-0.65872	7.0428	10.245	0.0013706	0.020897	LOC121864971	cytochrome b5-like, transcript variant X2
121868187	-1.0067	1.8463	10.235	0.0013782	0.020995	LOC121868187	uncharacterized LOC121868187
121864470	-0.61384	5.2663	10.224	0.0013866	0.021069	LOC121864470	uncharacterized LOC121864470
121865200	-0.6007	6.7193	10.217	0.0013918	0.02113	LOC121865200	V-type proton ATPase subunit D-like
121855251	-0.75896	4.7832	10.18	0.0014196	0.021516	LOC121855251	uncharacterized LOC121855251, transcript variant X3
121856955	-1.1703	0.13222	10.143	0.0014487	0.021902	LOC121856955	juvenile hormone esterase-like
121857728	-0.73036	4.7914	10.127	0.0014608	0.022047	LOC121857728	peroxisomal sarcosine oxidase-like
121862530	1.1568	1.9466	10.08	0.0014991	0.022569	LOC121862530	uncharacterized LOC121862530
121860582	-0.59227	6.3804	10.077	0.0015012	0.022574	LOC121860582	protein transport protein Sec23A-like, transcript variant X2
121856104	-0.57358	6.3785	10.076	0.001502	0.022574	LOC121856104	transcription factor cwo-like, transcript variant X5
121869206	-0.94529	0.93131	10.067	0.0015095	0.022668	LOC121869206	negative elongation factor E-like
121864617	-0.73719	6.2342	10.059	0.0015162	0.02272	LOC121864617	N(G),N(G)-dimethylarginine dimethylaminohydrolase 1-like
121864820	0.72009	7.4612	10.058	0.0015168	0.02272	LOC121864820	uncharacterized LOC121864820
121859703	-1.0213	1.2945	10.044	0.0015283	0.022873	LOC121859703	BTB/POZ domain-containing protein 1-like, transcript variant X2
121869817	-1.045	1.3628	10.026	0.0015432	0.023058	LOC121869817	uncharacterized LOC121869817
121880484	-0.94878	4.7307	10.014	0.0015532	0.023149	LOC121880484	matrix metalloproteinase-17-like
121867139	-0.91557	1.5352	10.001	0.0015641	0.023293	LOC121867139	caspase-like
121856156	-1.1629	2.596	9.9725	0.001589	0.023624	LOC121856156	arylsulfatase A-like
121875186	-0.84989	4.2985	9.9137	0.0016406	0.024331	LOC121875186	serine/threonine-protein kinase Nek4-like
121855191	-0.58823	6.3314	9.8979	0.0016547	0.02452	LOC121855191	protein FAM107B-like
121854487	-0.60269	5.035	9.8824	0.0016687	0.024686	LOC121854487	uncharacterized LOC121854487, transcript variant X3
121867613	-0.56072	7.0388	9.8681	0.0016817	0.024858	LOC121867613	1-acyl-sn-glycerol-3-phosphate acyltransferase delta-like, transcript variant X1
121854594	-0.58956	7.1377	9.8601	0.001689	0.024946	LOC121854594	protein piccolo-like, transcript variant X3
121877481	-0.6275	5.7657	9.8547	0.001694	0.024995	LOC121877481	myogenesis-regulating glycosidase-like, transcript variant X1
121854541	1.0542	2.1912	9.8535	0.0016951	0.024995	LOC121854541	uncharacterized LOC121854541
121872051	-0.71359	3.4449	9.8184	0.0017278	0.025455	LOC121872051	phosphatidylinositol transfer protein alpha isoform-like, transcript variant X3
121879298	-0.67314	3.5428	9.7852	0.0017593	0.025835	LOC121879298	transmembrane protein 254-like
121862366	-0.60421	6.2991	9.7807	0.0017635	0.025876	LOC121862366	dehydrogenase/reductase SDR family member 11-like, transcript variant X2
121866409	-0.60639	7.0597	9.7557	0.0017876	0.026184	LOC121866409	V-type proton ATPase subunit S1-like
121871077	1.1113	9.9489	9.7545	0.0017889	0.026184	LOC121871077	cuticle protein AM1159-like
121875613	-0.6103	6.1116	9.6874	0.0018553	0.027075	LOC121875613	centrosomal and chromosomal factor-like
121853761	0.68627	4.921	9.6821	0.0018607	0.027102	LOC121853761	uncharacterized LOC121853761
121872672	-1.0643	5.4165	9.6403	0.0019035	0.027659	LOC121872672	probable ribonuclease ZC3H12C
121861073	-1.052	2.3616	9.6148	0.0019302	0.028001	LOC121861073	transcription factor Sox-2-like, transcript variant X2
121872299	-0.73512	4.4971	9.6122	0.0019328	0.028017	LOC121872299	proton-coupled folate transporter-like
121866100	-0.84013	3.5292	9.5638	0.0019845	0.028674	LOC121866100	aldehyde dehydrogenase, dimeric NADP-preferring-like
121853727	1.1713	2.1116	9.5581	0.0019906	0.028716	LOC121853727	uncharacterized LOC121853727
121860892	0.62984	7.0333	9.5392	0.0020113	0.02899	LOC121860892	uncharacterized LOC121860892
121880026	-0.60457	5.1215	9.5249	0.002027	0.029193	LOC121880026	zinc finger protein 474-like, transcript variant X3
121853623	-0.73562	2.9101	9.4941	0.0020613	0.029639	LOC121853623	sulfotransferase family cytosolic 1B member 1-like, transcript variant X2
121874291	0.70503	3.6511	9.4797	0.0020775	0.029849	LOC121874291	probable RNA polymerase II nuclear localization protein SLC7A6OS, transcript variant X2
121861719	-1.329	0.22639	9.4409	0.002122	0.030463	LOC121861719	uncharacterized LOC121861719
121865186	-1.016	0.73288	9.4283	0.0021366	0.030624	LOC121865186	uncharacterized LOC121865186, transcript variant X2
121860367	-0.92049	2.715	9.41	0.002158	0.030906	LOC121860367	uncharacterized LOC121860367, transcript variant X2
121873250	-0.58141	5.0222	9.3991	0.0021709	0.031041	LOC121873250	uncharacterized LOC121873250
121866984	0.61301	6.1782	9.3631	0.002214	0.031633	LOC121866984	CCAAT/enhancer-binding protein gamma-like, transcript variant X1
121866579	-1.4656	1.4015	9.3282	0.0022566	0.032138	LOC121866579	uncharacterized LOC121866579
121862837	-0.72466	3.266	9.3118	0.0022768	0.032377	LOC121862837	uncharacterized LOC121862837, transcript variant X1
121862189	-0.83444	3.8884	9.3117	0.002277	0.032377	LOC121862189	solute carrier organic anion transporter family member 74D-like, transcript variant X9
121870239	-1.2772	1.1495	9.2964	0.0022961	0.032624	LOC121870239	uncharacterized LOC121870239
121876079	-0.57677	6.2598	9.2835	0.0023123	0.032827	LOC121876079	E3 ubiquitin-protein transferase MAEA-like, transcript variant X2
121859061	-0.56482	6.4909	9.2818	0.0023144	0.032831	LOC121859061	uncharacterized LOC121859061
121856939	-1.4508	0.67396	9.2683	0.0023316	0.033049	LOC121856939	uncharacterized LOC121856939, transcript variant X2
121855880	-1.3002	0.89621	9.2469	0.0023589	0.03341	LOC121855880	uncharacterized LOC121855880
121866438	-0.72546	7.4336	9.2445	0.0023621	0.033411	LOC121866438	heat shock protein 67B1-like
121860200	1.0685	1.9278	9.2378	0.0023706	0.033497	LOC121860200	pollen-specific leucine-rich repeat extensin-like protein 3
121859158	-0.78746	5.0225	9.2277	0.0023838	0.033656	LOC121859158	venom protease-like
121858167	0.96544	1.4385	9.2156	0.0023996	0.033852	LOC121858167	techylectin-5B-like, transcript variant X1
121865734	-1.2033	1.193	9.1908	0.0024323	0.034261	LOC121865734	large subunit ribosomal RNA
121858627	-1.3647	-0.4355	9.1858	0.002439	0.034328	LOC121858627	uncharacterized LOC121858627
121855489	0.74093	5.4106	9.1576	0.0024769	0.034779	LOC121855489	serine protease hepsin-like
121871062	1.0396	6.7648	9.1465	0.0024919	0.034908	LOC121871062	cuticle protein AMP2-like
121863823	-0.77994	3.1153	9.1409	0.0024996	0.034947	LOC121863823	uncharacterized LOC121863823, transcript variant X1
121877767	0.90395	3.7601	9.1402	0.0025005	0.034947	LOC121877767	cytadherence high molecular weight protein 1-like, transcript variant X1
121857750	-0.94725	2.6922	9.1188	0.0025299	0.035271	LOC121857750	uncharacterized protein YMR317W-like, transcript variant X1
121863207	-1.1372	2.1672	9.1176	0.0025316	0.035271	LOC121863207	venom protease-like, transcript variant X1
121870017	-0.96431	5.7293	9.1125	0.0025386	0.035342	LOC121870017	cystathionine beta-synthase-like
121864065	-1.0479	2.7338	9.1048	0.0025494	0.035465	LOC121864065	uncharacterized LOC121864065, transcript variant X2
121862117	-0.70723	3.0752	9.0979	0.0025591	0.035571	LOC121862117	ficolin-2-like
121855184	-1.1905	1.5893	9.093	0.0025658	0.035638	LOC121855184	uncharacterized LOC121855184, transcript variant X2
121877483	0.96445	5.3612	9.0782	0.0025868	0.035873	LOC121877483	neuroparsin-A-like, transcript variant X2
121858360	-1.2617	2.3251	9.0318	0.0026532	0.03671	LOC121858360	dipeptidase 1-like, transcript variant X4
121877974	-0.86084	3.5898	9.027	0.0026603	0.036751	LOC121877974	ADAMTS-like protein 4, transcript variant X2
121869569	-1.4706	-1.1423	9.0143	0.0026788	0.036949	LOC121869569	pancreatic lipase-related protein 2-like, transcript variant X2
121860124	-0.95948	2.7095	8.9813	0.0027276	0.037535	LOC121860124	uncharacterized LOC121860124
121854357	-0.65841	5.1287	8.9715	0.0027423	0.03768	LOC121854357	cytosolic phospholipase A2-like, transcript variant X3
121879066	-1.2065	2.5764	8.9429	0.0027854	0.038215	LOC121879066	uncharacterized LOC121879066, transcript variant X2
121870121	-1.0479	0.35189	8.9352	0.0027973	0.038319	LOC121870121	uncharacterized LOC121870121
121875258	-1.0333	5.0991	8.9096	0.0028368	0.038771	LOC121875258	serine/threonine-protein phosphatase CPPED1-like
121867315	-1.023	2.6996	8.9029	0.0028471	0.038883	LOC121867315	D-beta-hydroxybutyrate dehydrogenase, mitochondrial-like, transcript variant X2
121861347	-0.55832	5.8789	8.8983	0.0028544	0.038952	LOC121861347	uncharacterized LOC121861347
121854762	-0.98388	1.5996	8.8921	0.002864	0.039054	LOC121854762	carbohydrate sulfotransferase 11-like, transcript variant X3
121871047	-0.8069	4.2624	8.8612	0.002913	0.039601	LOC121871047	uncharacterized LOC121871047, transcript variant X2
121869506	-0.91652	3.6216	8.8592	0.0029161	0.039613	LOC121869506	nocturnin-like, transcript variant X1
121875828	-0.71809	2.9155	8.8268	0.0029684	0.040263	LOC121875828	uncharacterized LOC121875828, transcript variant X2
121879140	-0.63629	6.7299	8.8065	0.0030016	0.040621	LOC121879140	lysozyme-like, transcript variant X2
121868263	-0.88712	2.9781	8.7678	0.0030659	0.041398	LOC121868263	uncharacterized LOC121868263, transcript variant X2
121854263	-0.60738	4.0651	8.7626	0.0030746	0.041484	LOC121854263	MAGE-like protein 2
121878888	0.91749	2.0845	8.7471	0.0031009	0.041807	LOC121878888	uncharacterized LOC121878888
121855826	0.57029	4.5947	8.7338	0.0031236	0.042082	LOC121855826	DNA mismatch repair protein Msh3-like
121861925	0.70108	8.0069	8.7169	0.0031527	0.042411	LOC121861925	aminopeptidase N-like, transcript variant X2
121874236	0.82858	1.8444	8.7059	0.0031718	0.042571	LOC121874236	uncharacterized LOC121874236, transcript variant X1
121872954	-0.79484	1.8808	8.6824	0.003213	0.043093	LOC121872954	uncharacterized LOC121872954
121874992	-1.4926	3.0363	8.6731	0.0032294	0.043279	LOC121874992	D-beta-hydroxybutyrate dehydrogenase, mitochondrial-like, transcript variant X1
121869031	0.5222	5.1327	8.6393	0.0032899	0.044025	LOC121869031	uncharacterized LOC121869031
121868029	0.67462	3.9849	8.6369	0.0032941	0.044049	LOC121868029	DNA repair and recombination protein RAD54B-like, transcript variant X2
121879338	-1.2501	0.01223	8.6277	0.0033109	0.04424	LOC121879338	chitotriosidase-1-like
121868091	-0.86176	3.2068	8.625	0.0033158	0.044273	LOC121868091	uncharacterized LOC121868091
121868387	-0.57554	6.3291	8.6077	0.0033474	0.044661	LOC121868387	cytohesin-1-like, transcript variant X7
121876428	-0.64174	4.7507	8.6053	0.0033518	0.044687	LOC121876428	N-acetylgalactosaminyltransferase 6-like
121861457	1.3132	5.1204	8.5985	0.0033644	0.044769	LOC121861457	uncharacterized LOC121861457
121872395	-1.2119	0.45408	8.5982	0.0033649	0.044769	LOC121872395	uncharacterized LOC121872395
121879958	1.3936	1.0893	8.5902	0.0033798	0.044896	LOC121879958	adhesive plaque matrix protein-like
121867546	-1.0324	1.6006	8.5901	0.00338	0.044896	LOC121867546	major facilitator superfamily domain-containing protein 6-like, transcript variant X1
121854214	-0.71685	7.1674	8.5691	0.0034191	0.045368	LOC121854214	uncharacterized peptidase C1-like protein F26E4.3, transcript variant X1
121864170	-1.3014	4.8759	8.5683	0.0034206	0.045368	LOC121864170	bumetanide-sensitive sodium-(potassium)-chloride cotransporter-like, transcript variant X1
121879424	-1.4853	0.032398	8.563	0.0034307	0.045435	LOC121879424	uncharacterized LOC121879424
121880220	0.97096	12.365	8.5599	0.0034364	0.045477	LOC121880220	sarcoplasmic calcium-binding protein 1, transcript variant X3
121864688	-0.80515	4.4648	8.5581	0.00344	0.04549	LOC121864688	galactose-3-O-sulfotransferase 4-like, transcript variant X3
121872198	-0.9152	5.1902	8.5534	0.0034488	0.045574	LOC121872198	anti-lipopolysaccharide factor-like
121878094	-0.92531	4.0359	8.5424	0.0034696	0.045814	LOC121878094	serine-rich adhesin for platelets-like
121878072	0.69026	3.5544	8.493	0.0035651	0.047007	LOC121878072	uncharacterized LOC121878072
121855797	-1.2803	0.56801	8.4896	0.0035719	0.047045	LOC121855797	multiple inositol polyphosphate phosphatase 1-like
121857807	-0.54417	6.8707	8.4665	0.0036175	0.047592	LOC121857807	organic cation transporter protein-like, transcript variant X4
121876786	-1.4735	-0.090117	8.4574	0.0036355	0.047794	LOC121876786	alpha-mannosidase 2C1-like, transcript variant X1
121857958	-0.90125	5.4454	8.4549	0.0036407	0.047827	LOC121857958	myc proto-oncogene protein-like, transcript variant X1
121878775	1.1937	-0.44289	8.4399	0.0036708	0.048188	LOC121878775	tachykinin-like peptides receptor 86C
121867733	0.79016	10.11	8.4345	0.0036817	0.048275	LOC121867733	heat shock protein HSP 90-alpha-like
121874390	-1.2096	-0.47113	8.4339	0.0036829	0.048275	LOC121874390	cyclic nucleotide-gated cation channel beta-1-like
121872468	-0.81341	3.1378	8.4268	0.0036973	0.048419	LOC121872468	crustacean hyperglycemic hormones, transcript variant X2
121864906	-0.70133	3.1456	8.4259	0.0036992	0.048419	LOC121864906	uncharacterized LOC121864906
121868183	-0.71448	6.5735	8.4137	0.003724	0.048638	LOC121868183	dihydropyrimidine dehydrogenase [NADP(+)]-like
121879991	-0.66517	5.8252	8.3859	0.0037813	0.04935	LOC121879991	transcription factor AP-1-like
121866680	-0.64063	4.5701	8.3718	0.003811	0.0497	LOC121866680	uncharacterized LOC121866680, transcript variant X2
121856856	-0.63256	6.306	8.3603	0.0038351	0.049942	LOC121856856	ethanolamine-phosphate phospho-lyase-like, transcript variant X1
121877092	-4.581	-2.5938	8.3524	0.0038518	0.050087	LOC121877092	uncharacterized LOC121877092
121860620	-0.98529	2.4981	8.344	0.0038697	0.050284	LOC121860620	ras-related protein RabJ-like
121855181	-0.61377	4.7541	8.3196	0.003922	0.050927	LOC121855181	cytochrome P450 2L1-like, transcript variant X3
121860996	0.65193	5.2061	8.3079	0.0039474	0.051219	LOC121860996	trifunctional purine biosynthetic protein adenosine-3-like, transcript variant X1
121864248	3.9016	-2.8382	8.2939	0.0039778	0.051563	LOC121864248	uncharacterized LOC121864248
121874040	-0.58041	6.2614	8.2931	0.0039796	0.051563	LOC121874040	unconventional myosin-Ie-like, transcript variant X1
121867939	-0.83393	3.3996	8.2905	0.0039852	0.051598	LOC121867939	5'-3' exonuclease PLD3-like, transcript variant X2
121867691	-1.1041	0.30514	8.2738	0.0040222	0.052039	LOC121867691	neuroparsin-A-like
121859104	-0.52087	6.6509	8.2578	0.0040578	0.052462	LOC121859104	nuclear hormone receptor E75-like, transcript variant X1
121856833	0.63636	4.7202	8.2515	0.0040719	0.052606	LOC121856833	peptidyl-prolyl cis-trans isomerase E-like, transcript variant X3
121874989	-0.60874	5.1446	8.2477	0.0040803	0.052677	LOC121874989	pro-resilin-like, transcript variant X2
121879785	-0.66941	10.234	8.226	0.0041295	0.053274	LOC121879785	uncharacterized LOC121879785
121855677	-1.1834	-0.5634	8.2201	0.0041428	0.053407	LOC121855677	organic cation transporter-like protein
121859558	1.3359	3.032	8.2169	0.0041502	0.053463	LOC121859558	uncharacterized LOC121859558, transcript variant X2
121871545	-1.6874	-0.513	8.1789	0.0042381	0.054558	LOC121871545	BTB/POZ domain-containing protein 6-like
121874673	-1.4897	-1.2679	8.1384	0.0043336	0.055747	LOC121874673	venom allergen 5.02-like
121867922	-0.67758	4.197	8.1301	0.0043536	0.055963	LOC121867922	NPC intracellular cholesterol transporter 2-like
121861454	-0.71267	3.8249	8.1199	0.0043782	0.05624	LOC121861454	protein deadpan-like
121873214	-0.69976	6.9301	8.1101	0.004402	0.056505	LOC121873214	dehydrogenase/reductase SDR family member 12-like
121870212	-2.7335	-1.6719	8.1009	0.0044242	0.056721	LOC121870212	BUD13 homolog
121855173	-3.0726	1.0803	8.1006	0.0044252	0.056721	LOC121855173	uncharacterized LOC121855173
121873892	-0.6562	4.0147	8.0912	0.004448	0.056971	LOC121873892	palmitoyl-protein thioesterase 1-like, transcript variant X2
121867741	0.99073	8.4653	8.09	0.004451	0.056971	LOC121867741	heat shock protein HSP 90-alpha-like
121865353	3.1225	-2.7873	8.0869	0.0044586	0.057026	LOC121865353	uncharacterized LOC121865353
121858649	-0.74805	5.1063	8.0852	0.0044627	0.057026	LOC121858649	probable peroxisomal acyl-coenzyme A oxidase 1, transcript variant X5
121855962	-0.78851	6.6172	8.0844	0.0044648	0.057026	LOC121855962	thymidine phosphorylase-like
121853475	-1.1964	-0.6011	8.081	0.0044731	0.057091	LOC121853475	serine-rich 25 kDa antigen protein-like
121860623	-0.93431	4.9699	8.0673	0.0045071	0.057483	LOC121860623	beta-1,4-mannosyltransferase egh-like, transcript variant X7
121874341	-1.0978	1.8741	8.0657	0.0045111	0.057494	LOC121874341	uncharacterized LOC121874341
121868302	2.2109	-2.2693	8.0617	0.0045211	0.057581	LOC121868302	carbohydrate sulfotransferase 11-like, transcript variant X6
121856193	-0.9267	0.91747	8.06	0.0045254	0.057595	LOC121856193	importin subunit alpha-1a-like
121868803	-0.63976	3.9571	8.0497	0.0045512	0.057881	LOC121868803	uncharacterized LOC121868803, transcript variant X1
121870358	-2.1008	0.38496	8.0458	0.0045609	0.057964	LOC121870358	uncharacterized LOC121870358
121854248	0.53895	5.4912	8.0313	0.0045975	0.058389	LOC121854248	dipeptidyl peptidase 3-like, transcript variant X2
121874965	-4.0544	-2.9018	8.0286	0.0046045	0.058435	LOC121874965	general transcription factor II-I repeat domain-containing protein 2A-like
121858651	-0.73772	4.012	8.0214	0.0046227	0.058625	LOC121858651	uncharacterized LOC121858651
121869497	-1.6781	0.992	8.0201	0.0046261	0.058627	LOC121869497	uncharacterized LOC121869497
121866195	-4.1722	-1.2676	8.0172	0.0046336	0.05868	LOC121866195	uncharacterized LOC121866195
121865461	-1.7443	-1.009	7.9972	0.004685	0.059289	LOC121865461	homeobox protein DBX1-like
121853240	-3.8812	-1.7139	7.9889	0.0047066	0.059521	LOC121853240	uncharacterized LOC121853240, transcript variant X2
121879940	0.75874	4.1635	7.9826	0.0047229	0.05963	LOC121879940	uncharacterized LOC121879940
121860782	-0.60819	4.8999	7.9822	0.0047241	0.05963	LOC121860782	cell division cycle protein 20 homolog, transcript variant X2
121864937	-1.9512	-1.9602	7.9817	0.0047252	0.05963	LOC121864937	uncharacterized LOC121864937
121854774	1.1773	3.602	7.9775	0.0047362	0.059726	LOC121854774	uncharacterized LOC121854774, transcript variant X2
121870209	-0.50346	6.2762	7.9676	0.0047622	0.060013	LOC121870209	uncharacterized LOC121870209, transcript variant X3
121863559	2.355	-1.0018	7.9576	0.0047887	0.060304	LOC121863559	cuticle protein AMP1A-like
121866522	-2.2888	-0.38724	7.9547	0.0047963	0.060357	LOC121866522	monocarboxylate transporter 12-like
121877101	-1.1669	2.5742	7.9048	0.0049304	0.061987	LOC121877101	uncharacterized LOC121877101
121859755	-0.68206	3.2476	7.9039	0.0049327	0.061987	LOC121859755	uncharacterized LOC121859755
121854112	-0.8321	3.1306	7.8917	0.0049663	0.062365	LOC121854112	uncharacterized LOC121854112
121864633	-0.64361	4.0959	7.884	0.0049873	0.062586	LOC121864633	rhomboid-related protein 2-like, transcript variant X5
121867690	-1.267	5.3602	7.8761	0.0050092	0.062816	LOC121867690	uncharacterized LOC121867690
121868321	-0.53351	7.8424	7.8733	0.005017	0.062871	LOC121868321	aldo-keto reductase family 1 member B1-like
121868509	-2.6517	-2.3141	7.8621	0.0050482	0.063218	LOC121868509	retinol dehydrogenase 11-like
121866200	-2.63	1.2541	7.8514	0.0050782	0.063549	LOC121866200	uncharacterized LOC121866200
121859899	-0.6226	5.0011	7.8403	0.0051093	0.063893	LOC121859899	cellular retinoic acid-binding protein 1-like, transcript variant X3
121867467	-1.5301	0.35598	7.8198	0.0051677	0.064578	LOC121867467	sorbitol dehydrogenase-like
121874994	-1.3847	1.723	7.8097	0.0051966	0.064894	LOC121874994	uncharacterized LOC121874994
121873312	-1.037	2.7385	7.802	0.005219	0.065128	LOC121873312	solute carrier family 35 member F6-like, transcript variant X1
121853489	2.4239	-1.94	7.7988	0.0052282	0.065198	LOC121853489	early growth response protein 1-like
121866574	-1.5827	-0.84252	7.7973	0.0052325	0.065207	LOC121866574	alkaline phosphatase-like
121861852	-2.0651	-2.0234	7.79	0.0052536	0.065424	LOC121861852	juvenile hormone esterase-like
121866211	3.2227	-2.9825	7.7879	0.0052597	0.065452	LOC121866211	uncharacterized LOC121866211
121872657	-0.68917	7.955	7.7867	0.0052632	0.065452	LOC121872657	uncharacterized LOC121872657, transcript variant X1
121879857	-0.75056	5.3762	7.7812	0.0052794	0.065609	LOC121879857	carotenoid isomerooxygenase-like
121872486	-0.6814	5.0143	7.7743	0.0052996	0.065814	LOC121872486	uncharacterized LOC121872486, transcript variant X2
121865386	-4.3707	-2.538	7.7699	0.0053125	0.065905	LOC121865386	protein kinase 4-like
121859123	1.0281	1.5285	7.7693	0.0053143	0.065905	LOC121859123	facilitated trehalose transporter Tret1-2 homolog
121875307	-0.53009	6.3352	7.7605	0.0053401	0.066158	LOC121875307	translocating chain-associated membrane protein 1-like, transcript variant X2
121853629	-0.64752	4.2916	7.7588	0.005345	0.066158	LOC121853629	maltase 2-like, transcript variant X1
121873673	-1.0736	-0.098151	7.7586	0.0053457	0.066158	LOC121873673	UDP-glycosyltransferase UGT5-like
121877253	-0.56582	6.036	7.7464	0.0053819	0.066559	LOC121877253	membrane-associated progesterone receptor component 1-like, transcript variant X1
121876229	-2.0935	-0.35534	7.7389	0.0054043	0.06679	LOC121876229	mucin-5AC-like
121862418	-0.90672	2.8566	7.7357	0.005414	0.066865	LOC121862418	uncharacterized LOC121862418
121859490	2.7584	-2.9948	7.7282	0.0054365	0.067097	LOC121859490	putative uncharacterized protein ENSP00000383309
121862160	-1.0214	1.8745	7.724	0.005449	0.06717	LOC121862160	ileal sodium/bile acid cotransporter-like
121866242	3.2099	-3.1548	7.7237	0.00545	0.06717	LOC121866242	uncharacterized LOC121866242
121877878	-0.50453	6.5084	7.721	0.0054583	0.067226	LOC121877878	acylpyruvase FAHD1, mitochondrial-like
121866575	-1.1662	0.52068	7.7126	0.0054836	0.067492	LOC121866575	proton-coupled folate transporter-like
121863640	-1.4137	0.058586	7.7093	0.0054936	0.067569	LOC121863640	DNA-binding protein D-ETS-6-like
121869923	-1.1269	3.0553	7.701	0.0055189	0.06779	LOC121869923	TLC domain-containing protein 2-like
121854856	-2.5667	-2.3209	7.7003	0.005521	0.06779	LOC121854856	uncharacterized LOC121854856
121865898	-0.69699	3.6319	7.6997	0.0055229	0.06779	LOC121865898	organic solute transporter subunit alpha-like, transcript variant X1
121875940	-1.7975	-2.1034	7.69	0.0055529	0.068111	LOC121875940	loricrin-like, transcript variant X1
121860938	-0.56957	3.9449	7.6884	0.0055578	0.068125	LOC121860938	galactokinase-like, transcript variant X1
121865064	-0.56166	6.4711	7.6733	0.0056045	0.068647	LOC121865064	uncharacterized LOC121865064, transcript variant X1
121863473	-2.1614	-1.7762	7.6721	0.0056081	0.068647	LOC121863473	large subunit ribosomal RNA
121878249	-1.7885	-0.64172	7.6617	0.0056407	0.068954	LOC121878249	uncharacterized LOC121878249
121875371	-1.7885	-0.64172	7.6616	0.0056408	0.068954	LOC121875371	uncharacterized LOC121875371
121867919	-0.73613	5.3252	7.6593	0.0056481	0.068995	LOC121867919	uncharacterized LOC121867919
121876739	-0.71707	5.3941	7.6482	0.0056829	0.069374	LOC121876739	uncharacterized LOC121876739
121871069	1.0283	5.5784	7.6365	0.00572	0.069779	LOC121871069	cuticle protein AMP2-like
121874068	2.0222	1.0064	7.6311	0.0057371	0.06994	LOC121874068	uncharacterized LOC121874068
121853295	-0.85783	5.2205	7.6297	0.0057414	0.069945	LOC121853295	epidermal growth factor receptor kinase substrate 8-like, transcript variant X2
121853842	-2.3237	0.88682	7.6212	0.0057685	0.070227	LOC121853842	macrophage mannose receptor 1-like
121860568	-2.6465	0.48284	7.619	0.0057756	0.070266	LOC121860568	putative phosphoenolpyruvate synthase
121878209	-0.64981	4.8128	7.6161	0.005785	0.070333	LOC121878209	carbohydrate sulfotransferase 5-like
121867110	1.4382	3.5179	7.6089	0.0058082	0.070568	LOC121867110	cuticle protein AM1159-like
121856356	-1.4986	0.43127	7.6016	0.0058316	0.070804	LOC121856356	uncharacterized LOC121856356
121861534	-0.61136	4.8961	7.586	0.0058823	0.071371	LOC121861534	rho GTPase-activating protein 39-like, transcript variant X4
121855761	2.0826	2.41	7.5833	0.0058911	0.071429	LOC121855761	RNA polymerase-associated protein RTF1 homolog
121859161	-0.70326	4.2378	7.5745	0.0059201	0.071733	LOC121859161	fibrillin-2-like, transcript variant X6
121868328	-1.485	-0.89321	7.5693	0.0059372	0.071891	LOC121868328	major facilitator superfamily domain-containing protein 6-like
121878468	-0.66762	5.2065	7.5647	0.0059523	0.072026	LOC121878468	sodium-coupled monocarboxylate transporter 2-like
121867507	-0.68128	4.8702	7.5522	0.0059936	0.072476	LOC121867507	cuticle protein 8-like
121855940	-0.73224	5.1512	7.5504	0.0059997	0.072501	LOC121855940	xanthine dehydrogenase/oxidase-like, transcript variant X1
121864992	-1.5059	-0.23674	7.5455	0.0060161	0.072651	LOC121864992	uncharacterized LOC121864992
121874983	-1.189	-0.77095	7.538	0.006041	0.072902	LOC121874983	pancreas transcription factor 1 subunit alpha-like
121879001	-0.59756	3.8042	7.5321	0.006061	0.073077	LOC121879001	uncharacterized LOC121879001
121879948	0.49651	5.7589	7.5313	0.0060636	0.073077	LOC121879948	SET domain-containing protein 9-like, transcript variant X5
121867565	-1.0052	3.7816	7.5243	0.0060872	0.073312	LOC121867565	monocarboxylate transporter 12-B-like
121870759	-2.3686	-1.9211	7.5199	0.0061022	0.07337	LOC121870759	uncharacterized LOC121870759
121864142	-0.92793	2.1797	7.5194	0.0061037	0.07337	LOC121864142	xaa-Pro dipeptidase-like
121860363	-0.51201	4.489	7.5193	0.0061043	0.07337	LOC121860363	uncharacterized LOC121860363, transcript variant X3
121857731	3.7015	-3.0398	7.5132	0.0061247	0.073566	LOC121857731	uncharacterized LOC121857731
121878145	-2.154	-0.36033	7.5091	0.0061387	0.073685	LOC121878145	putative serine protease K12H4.7
121863439	4.2935	-2.3498	7.4988	0.006174	0.074043	LOC121863439	uncharacterized LOC121863439
121865658	0.95167	3.7613	7.498	0.0061768	0.074043	LOC121865658	uncharacterized LOC121865658
121869261	-2.1828	3.5491	7.4933	0.006193	0.074188	LOC121869261	carboxypeptidase B-like
121859864	1.1751	7.511	7.4919	0.0061976	0.074194	LOC121859864	uncharacterized LOC121859864
121877573	-0.6978	5.001	7.4844	0.0062236	0.074382	LOC121877573	protein Smaug homolog 1-like, transcript variant X2
121870473	0.83746	2.5708	7.4842	0.0062243	0.074382	LOC121870473	cysteine sulfinic acid decarboxylase-like
121865256	-0.67697	3.0378	7.4838	0.0062258	0.074382	LOC121865256	uncharacterized LOC121865256
121868415	-0.49282	6.2835	7.4758	0.0062535	0.074663	LOC121868415	proline-rich receptor-like protein kinase PERK10
121864776	-0.63448	3.4863	7.4744	0.0062584	0.074672	LOC121864776	uncharacterized LOC121864776
121879764	-2.4445	-0.2435	7.4689	0.0062774	0.074849	LOC121879764	receptor-type tyrosine-protein phosphatase O-like, transcript variant X1
121871090	1.2275	5.3804	7.4644	0.006293	0.074985	LOC121871090	cuticle protein AM1159-like
121875027	-1.2843	0.41472	7.4625	0.0062999	0.075018	LOC121875027	5-exo-hydroxycamphor dehydrogenase-like
121857101	-0.52883	7.2033	7.4585	0.0063136	0.075131	LOC121857101	peptidyl-prolyl cis-trans isomerase B-like
121868726	-1.3814	-1.5053	7.4525	0.0063349	0.075334	LOC121868726	uncharacterized LOC121868726
121870811	-0.6675	2.3271	7.4484	0.0063494	0.075412	LOC121870811	A disintegrin and metalloproteinase with thrombospondin motifs adt-2-like
121858516	-0.63099	7.7745	7.4482	0.0063498	0.075412	LOC121858516	leukocyte surface antigen CD53-like
121873119	-2.0744	-1.228	7.4125	0.0064771	0.076873	LOC121873119	titin-like
121856601	-1.2552	3.4351	7.4074	0.0064956	0.077012	LOC121856601	uncharacterized LOC121856601
121877747	1.5977	0.30111	7.4066	0.0064985	0.077012	LOC121877747	extensin-like
121875140	-0.5144	6.4096	7.4057	0.0065017	0.077012	LOC121875140	acetyl-coenzyme A synthetase 2-like, mitochondrial, transcript variant X2
121862970	-1.3502	-1.0296	7.4017	0.0065161	0.077132	LOC121862970	receptor-type tyrosine-protein phosphatase beta-like
121856696	1.4427	-1.1879	7.399	0.0065259	0.077158	LOC121856696	GATA zinc finger domain-containing protein 13-like
121853773	0.57494	4.6034	7.3988	0.0065269	0.077158	LOC121853773	uncharacterized LOC121853773
121867945	0.70192	6.334	7.3966	0.0065348	0.0772	LOC121867945	uncharacterized LOC121867945
121879996	0.64299	4.6811	7.3949	0.006541	0.077222	LOC121879996	organic cation transporter protein-like, transcript variant X2
121863151	-0.52517	6.7528	7.3929	0.0065481	0.077255	LOC121863151	V-type proton ATPase 21 kDa proteolipid subunit-like
121878887	-0.75547	1.7471	7.3907	0.0065561	0.0773	LOC121878887	probable flavin-containing monoamine oxidase A, transcript variant X2
121858699	-0.6057	4.5215	7.3869	0.0065702	0.077414	LOC121858699	hexokinase-1-like, transcript variant X3
121853472	-0.52134	5.1238	7.3807	0.0065928	0.077629	LOC121853472	tumor necrosis factor alpha-induced protein 8-like protein
121865077	-2.0707	-0.40251	7.3663	0.0066458	0.078203	LOC121865077	pantetheinase-like
121878131	-1.1475	1.359	7.3547	0.0066887	0.078655	LOC121878131	uncharacterized LOC121878131, transcript variant X1
121871457	-0.58914	3.3404	7.3359	0.0067589	0.07943	LOC121871457	uncharacterized LOC121871457, transcript variant X4
121872487	-2.856	-0.058417	7.3233	0.0068067	0.079914	LOC121872487	uncharacterized LOC121872487
121855859	-1.8649	-1.4362	7.3219	0.0068121	0.079914	LOC121855859	uncharacterized LOC121855859
121861588	-3.4518	-1.5202	7.3215	0.0068135	0.079914	LOC121861588	uncharacterized LOC121861588, transcript variant X1
121874777	1.9141	-1.5026	7.3145	0.00684	0.080173	LOC121874777	kelch-like protein diablo
121855760	0.76171	4.3293	7.2908	0.0069309	0.081185	LOC121855760	N-acylneuraminate cytidylyltransferase-like, transcript variant X5
121863075	-0.69896	2.4017	7.2843	0.006956	0.081425	LOC121863075	heat shock 70 kDa protein cognate 4-like, transcript variant X2
121867419	-0.46941	5.9099	7.2822	0.0069639	0.081465	LOC121867419	partitioning defective 3 homolog
121865550	2.319	-2.8328	7.2806	0.0069703	0.081487	LOC121865550	filaggrin-like
121862103	-0.96601	2.583	7.2347	0.007151	0.083544	LOC121862103	uncharacterized LOC121862103
121858864	-1.2411	-0.13037	7.2334	0.0071561	0.08355	LOC121858864	carbonyl reductase [NADPH] 1-like
121862129	-0.62111	3.3918	7.2064	0.0072646	0.084762	LOC121862129	trans-1,2-dihydrobenzene-1,2-diol dehydrogenase-like, transcript variant X1
121870242	-0.87291	5.6484	7.2036	0.0072756	0.084835	LOC121870242	heat shock 70 kDa protein cognate 4-like
121868781	-1.5772	-0.36193	7.2007	0.0072874	0.084917	LOC121868781	alpha-L-fucosidase-like, transcript variant X1
121864790	2.062	-1.167	7.191	0.0073272	0.085325	LOC121864790	protein argonaute-2-like
121877138	-1.0768	-0.15482	7.1879	0.0073398	0.085373	LOC121877138	uncharacterized LOC121877138, transcript variant X1
121866425	0.73384	3.0696	7.1876	0.0073408	0.085373	LOC121866425	sodium leak channel non-selective protein-like, transcript variant X2
121860838	1.2208	-0.36823	7.1807	0.0073692	0.085648	LOC121860838	uncharacterized LOC121860838
121864765	-1.4118	-0.96079	7.1727	0.0074023	0.085931	LOC121864765	von Willebrand factor A domain-containing protein 5A-like
121866191	-1.3116	2.8339	7.1724	0.0074032	0.085931	LOC121866191	uncharacterized LOC121866191, transcript variant X2
121874458	-2.5488	0.98175	7.1618	0.0074472	0.086387	LOC121874458	oplophorus-luciferin 2-monooxygenase non-catalytic subunit-like
121877594	1.8066	-2.3132	7.1428	0.0075266	0.087251	LOC121877594	hyphally regulated cell wall protein 1-like
121871657	1.0441	-0.28232	7.1264	0.0075957	0.087995	LOC121871657	uncharacterized LOC121871657
121873513	-0.83962	3.612	7.1207	0.0076199	0.088219	LOC121873513	mitochondrial ornithine transporter 1-like, transcript variant X5
121863890	2.6053	-2.9644	7.1179	0.0076316	0.088298	LOC121863890	uncharacterized LOC121863890
121874578	-1.0021	0.95461	7.1164	0.007638	0.088314	LOC121874578	uncharacterized LOC121874578, transcript variant X5
121865660	-1.6107	0.56755	7.106	0.0076824	0.088771	LOC121865660	uncharacterized LOC121865660
121854332	-2.2153	1.2551	7.1027	0.0076968	0.088879	LOC121854332	probable RNA-binding protein 46, transcript variant X2
121861233	-0.94324	2.9957	7.0968	0.0077221	0.089114	LOC121861233	voltage-dependent calcium channel subunit alpha-2/delta-2-like
121873526	-0.66117	3.7353	7.0957	0.007727	0.089114	LOC121873526	uncharacterized LOC121873526
121868412	-1.1409	0.5844	7.094	0.0077341	0.089139	LOC121868412	uncharacterized LOC121868412
121871102	0.78544	8.5745	7.0828	0.0077827	0.089641	LOC121871102	cuticle protein AMP4-like
121865656	-1.489	1.2739	7.075	0.0078166	0.089973	LOC121865656	ecdysone-induced protein 78C-like
121874719	1.148	0.77116	7.0656	0.0078579	0.090391	LOC121874719	uncharacterized LOC121874719
121859523	-0.61601	3.71	7.061	0.0078779	0.090563	LOC121859523	uncharacterized LOC121859523, transcript variant X1
121854694	0.97284	7.9221	7.0469	0.0079401	0.09122	LOC121854694	uncharacterized LOC121854694
121872632	-0.94123	3.2719	7.0451	0.0079481	0.091253	LOC121872632	extensin-like
121869350	0.5159	6.1438	7.0413	0.0079651	0.09139	LOC121869350	uncharacterized LOC121869350
121873233	-1.0016	0.89679	7.0245	0.0080401	0.092174	LOC121873233	uncharacterized LOC121873233
121867450	-0.47372	6.0475	7.0237	0.0080437	0.092174	LOC121867450	Krueppel-like factor 16
121873548	-1.3696	2.0083	7.022	0.0080512	0.092201	LOC121873548	mitochondrial enolase superfamily member 1-like, transcript variant X3
121875066	-1.2401	1.7573	7.0111	0.0081005	0.092707	LOC121875066	uncharacterized LOC121875066
121868720	-1.0583	0.30991	7.0078	0.0081156	0.09282	LOC121868720	uncharacterized LOC121868720
121862513	2.0362	-2.8752	6.9984	0.0081583	0.093249	LOC121862513	uncharacterized LOC121862513
121870348	-3.1523	-2.2011	6.9871	0.00821	0.09378	LOC121870348	sucrase-isomaltase, intestinal-like
121860120	-1.7139	-1.7032	6.9687	0.0082949	0.09469	LOC121860120	membrane frizzled-related protein-like
121858508	-1.0822	-0.1311	6.965	0.008312	0.094824	LOC121858508	SCAN domain-containing protein 3-like
121872675	-1.6547	-0.87817	6.9611	0.0083299	0.094969	LOC121872675	oplophorus-luciferin 2-monooxygenase non-catalytic subunit-like
121873718	-0.47632	5.1318	6.9418	0.0084206	0.095941	LOC121873718	epoxide hydrolase 3-like
121857507	0.5671	4.5861	6.9355	0.0084502	0.096217	LOC121857507	uncharacterized LOC121857507, transcript variant X4
121858239	0.67399	4.7819	6.9239	0.0085052	0.096711	LOC121858239	PAN2-PAN3 deadenylation complex catalytic subunit PAN2-like, transcript variant X6
121862958	-2.3129	-2.7371	6.9234	0.0085074	0.096711	LOC121862958	protein ZBED8-like
121876927	-0.58183	3.7718	6.9229	0.0085097	0.096711	LOC121876927	uncharacterized LOC121876927
121878620	-3.3702	-1.0739	6.9206	0.0085208	0.096776	LOC121878620	uncharacterized LOC121878620, transcript variant X3
121873364	-2.1868	-2.1307	6.9095	0.008574	0.097318	LOC121873364	lysosome membrane protein 2-like
121855966	-2.5849	-2.3692	6.9065	0.0085881	0.097417	LOC121855966	uncharacterized LOC121855966
121876842	-0.48785	5.417	6.9032	0.008604	0.097531	LOC121876842	major facilitator superfamily domain-containing protein 10-like, transcript variant X2
121874226	-1.1452	0.74419	6.9022	0.008609	0.097531	LOC121874226	uncharacterized LOC121874226
121874906	-1.2452	-0.65851	6.8986	0.0086261	0.097663	LOC121874906	uncharacterized LOC121874906
121867324	-0.47167	7.6016	6.8956	0.008641	0.09777	LOC121867324	tensin-1-like
121879927	-0.74086	3.8343	6.8909	0.0086634	0.097962	LOC121879927	mitochondrial amidoxime reducing component 2-like
121872899	0.82305	0.98822	6.8862	0.0086863	0.098158	LOC121872899	uncharacterized LOC121872899, transcript variant X2
121866488	1.3103	0.52025	6.8846	0.0086941	0.098185	LOC121866488	uncharacterized LOC121866488
121868249	0.58797	6.7698	6.8719	0.0087563	0.098767	LOC121868249	F-box/LRR-repeat protein 2-like, transcript variant X6
121876205	-1.2025	2.4935	6.8718	0.0087567	0.098767	LOC121876205	major facilitator superfamily domain-containing protein 8-like, transcript variant X3
121876240	-0.85099	1.3996	6.8624	0.0088027	0.099224	LOC121876240	uncharacterized LOC121876240
121861055	-0.57776	4.5836	6.8485	0.0088714	0.099936	LOC121861055	protein O-mannosyl-transferase 2-like
121863756	0.68179	1.8585	6.8345	0.0089414	0.10066	LOC121863756	chitinase-3-like protein 2
121865706	-1.1828	0.12252	6.8298	0.0089647	0.10086	LOC121865706	uncharacterized LOC121865706
121859013	0.54804	4.7182	6.8257	0.0089857	0.101	LOC121859013	uncharacterized LOC121859013
121878425	-0.69597	6.2879	6.8251	0.0089888	0.101	LOC121878425	polyunsaturated fatty acid 5-lipoxygenase-like, transcript variant X1
121868652	-1.3768	-0.61858	6.821	0.0090093	0.10117	LOC121868652	phosphatidylinositol phosphatase PTPRQ-like
121860015	-0.81604	6.7614	6.8198	0.0090151	0.10117	LOC121860015	trypsin-1-like
121858955	3.5099	-3.028	6.8162	0.0090336	0.10132	LOC121858955	uncharacterized LOC121858955
121868025	-2.1777	1.1435	6.8107	0.0090615	0.10152	LOC121868025	carboxypeptidase N subunit 2-like, transcript variant X2
121861429	-0.92513	0.0038067	6.8092	0.0090689	0.10152	LOC121861429	uncharacterized LOC121861429
121869818	-1.431	-1.4695	6.8092	0.0090689	0.10152	LOC121869818	uncharacterized LOC121869818, transcript variant X1
121878287	1.7254	-1.0899	6.7898	0.0091681	0.10257	LOC121878287	kelch-like protein diablo
121867731	0.62698	5.004	6.7886	0.0091743	0.10257	LOC121867731	dnaJ homolog subfamily A member 1-like
121861032	-0.48634	6.3743	6.776	0.009239	0.10322	LOC121861032	solute carrier family 45 member 3-like
121876741	-0.56507	6.3131	6.7751	0.0092436	0.10322	LOC121876741	uncharacterized LOC121876741, transcript variant X1
121869082	-0.49374	6.8845	6.7629	0.0093074	0.1038	LOC121869082	flocculation protein FLO11-like, transcript variant X2
121876794	-0.6188	3.0242	6.7626	0.0093086	0.1038	LOC121876794	uncharacterized LOC121876794, transcript variant X2
121859427	-1.2155	-0.0063863	6.7609	0.0093177	0.1038	LOC121859427	uncharacterized LOC121859427
121876349	0.60903	6.3346	6.7608	0.0093182	0.1038	LOC121876349	zygotic DNA replication licensing factor mcm3-like
121855528	-0.75676	2.6807	6.7569	0.0093384	0.10396	LOC121855528	uncharacterized LOC121855528
121869536	-0.50607	7.4827	6.7519	0.0093647	0.10418	LOC121869536	protein transport protein Sec61 subunit alpha
121862542	-2.5221	-1.465	6.7393	0.0094313	0.10481	LOC121862542	uncharacterized LOC121862542
121853211	-0.50594	5.5762	6.7391	0.0094323	0.10481	LOC121853211	uncharacterized LOC121853211
121870372	-1.4964	-0.9914	6.7373	0.0094418	0.10485	LOC121870372	pro-resilin-like, transcript variant X2
121873024	-1.0089	2.0449	6.7318	0.0094711	0.10506	LOC121873024	alkaline ceramidase-like
121856634	-1.4925	2.5528	6.7314	0.0094729	0.10506	LOC121856634	uncharacterized LOC121856634, transcript variant X1
121867819	3.3608	-3.0108	6.7286	0.0094879	0.10512	LOC121867819	protein ZBED8-like
121864717	1.0103	4.9155	6.7282	0.0094899	0.10512	LOC121864717	uncharacterized LOC121864717
121861944	-1.5367	-0.38523	6.7242	0.0095114	0.10528	LOC121861944	uncharacterized LOC121861944
121880490	-0.52189	3.5473	6.7233	0.0095159	0.10528	LOC121880490	gastrula zinc finger protein XlCGF8.2DB-like
121853571	-0.79873	3.3463	6.7182	0.0095432	0.10552	LOC121853571	RAB6A-GEF complex partner protein 2-like
121853667	0.86791	6.9419	6.7077	0.0095997	0.10606	LOC121853667	actin-like
121858616	0.62832	3.9084	6.7068	0.0096046	0.10606	LOC121858616	uncharacterized LOC121858616
121854785	-1.3153	0.26761	6.7043	0.0096182	0.10614	LOC121854785	dynein regulatory complex protein 1-like, transcript variant X1
121867121	1.3318	2.3786	6.7025	0.0096275	0.10614	LOC121867121	cuticle protein AM1159-like
121879306	-3.0735	-1.7332	6.7022	0.0096292	0.10614	LOC121879306	keratin, type II cytoskeletal 2 epidermal-like, transcript variant X2
121876830	-1.0081	3.7479	6.6979	0.0096525	0.10633	LOC121876830	epidermal retinol dehydrogenase 2-like, transcript variant X2
121877778	-1.8606	2.122	6.695	0.0096685	0.10644	LOC121877778	lysosomal acid glucosylceramidase-like
121878829	-1.455	-0.3303	6.6865	0.0097146	0.10688	LOC121878829	uncharacterized LOC121878829
121875648	-1.7326	-1.1632	6.665	0.0098324	0.10811	LOC121875648	uncharacterized LOC121875648
121879099	-2.4276	-0.90702	6.6637	0.0098395	0.10813	LOC121879099	neprilysin-1-like, transcript variant X3
121866992	-1.8016	-1.1787	6.6582	0.0098698	0.10834	LOC121866992	uncharacterized LOC121866992
121875749	-1.4075	1.1683	6.658	0.0098713	0.10834	LOC121875749	3-hydroxybutyrate dehydrogenase type 2-like
121880194	-0.53589	4.5322	6.6555	0.0098851	0.10837	LOC121880194	poly(U)-specific endoribonuclease homolog, transcript variant X2
121854265	-0.58497	3.8266	6.6553	0.009886	0.10837	LOC121854265	metabotropic glutamate receptor 1-like, transcript variant X2
121855277	-0.49444	4.5738	6.6512	0.0099091	0.10856	LOC121855277	peptidyl-prolyl cis-trans isomerase 2-like
121856243	0.52253	4.2344	6.6491	0.0099206	0.10862	LOC121856243	uncharacterized LOC121856243, transcript variant X1
121869462	1.6873	-2.096	6.6415	0.0099631	0.10902	LOC121869462	cuticle protein 7-like
121853248	2.6625	-2.7258	6.634	0.010005	0.10941	LOC121853248	uncharacterized LOC121853248
121868123	-0.47292	6.9225	6.6298	0.010028	0.1096	LOC121868123	6-phosphofructo-2-kinase/fructose-2,6-bisphosphatase-like, transcript variant X2
121855993	0.53563	7.5558	6.6247	0.010057	0.10985	LOC121855993	60S ribosomal protein L12-like
121858754	1.4518	-0.24584	6.6222	0.010071	0.10993	LOC121858754	pupal cuticle protein 20-like
121876613	-1.0235	2.2604	6.619	0.010089	0.11006	LOC121876613	myelin transcription factor 1-like protein
121860187	-1.9905	-1.367	6.6007	0.010194	0.11114	LOC121860187	anti-lipopolysaccharide factor-like
121872944	-0.85579	0.92908	6.5714	0.010363	0.11291	LOC121872944	uncharacterized LOC121872944
121856609	-0.51838	6.1284	6.57	0.010371	0.11293	LOC121856609	scoloptoxin SSD14-like, transcript variant X2
121869245	3.0178	-2.9729	6.5519	0.010477	0.11402	LOC121869245	cuticle protein 7-like
121859956	-1.2046	0.63872	6.5498	0.010489	0.11407	LOC121859956	uncharacterized LOC121859956
121871968	-2.9899	-2.7669	6.5487	0.010496	0.11407	LOC121871968	uncharacterized LOC121871968
121865049	-0.48821	6.4857	6.5478	0.010501	0.11407	LOC121865049	C-1-tetrahydrofolate synthase, cytoplasmic-like, transcript variant X1
121863333	0.89202	2.5139	6.5399	0.010548	0.1145	LOC121863333	uncharacterized LOC121863333
121871419	0.48031	5.06	6.5386	0.010556	0.1145	LOC121871419	condensin-2 complex subunit D3-like, transcript variant X1
121862733	0.48882	4.197	6.5378	0.01056	0.1145	LOC121862733	zinc finger protein 91-like
121853789	2.9952	-3.2304	6.5368	0.010567	0.1145	LOC121853789	trypsin-1-like
121863336	-2.3845	-2.757	6.5324	0.010592	0.11471	LOC121863336	protein ZBED8-like
121864946	-0.76633	1.2592	6.5269	0.010625	0.115	LOC121864946	uncharacterized LOC121864946
121875021	2.9627	-3.1319	6.5232	0.010648	0.11517	LOC121875021	H/ACA ribonucleoprotein complex subunit 4-like
121866434	0.75808	1.4604	6.5221	0.010654	0.11517	LOC121866434	uncharacterized LOC121866434
121873105	1.4776	-0.97887	6.5167	0.010686	0.11545	LOC121873105	uncharacterized LOC121873105
121876239	0.63915	5.0537	6.5028	0.01077	0.11629	LOC121876239	DNA replication licensing factor Mcm5-like
121878977	0.73951	1.8569	6.4927	0.010832	0.11689	LOC121878977	uncharacterized LOC121878977
121877418	0.76407	5.4754	6.4899	0.010849	0.117	LOC121877418	apolipoprotein D-like
121869735	3.0136	-3.1815	6.4804	0.010907	0.11756	LOC121869735	cuticle protein 7-like
121867431	-2.1756	-1.0866	6.4643	0.011007	0.11856	LOC121867431	glutamate receptor ionotropic, delta-2-like
121856073	0.48192	4.5194	6.4579	0.011046	0.11891	LOC121856073	carbohydrate sulfotransferase 11-like, transcript variant X2
121880074	-0.50786	7.5652	6.4363	0.011181	0.12029	LOC121880074	spectrin beta chain, non-erythrocytic 1-like
121868197	-1.7783	0.045733	6.4332	0.011201	0.12043	LOC121868197	dynein intermediate chain 2, ciliary-like
121876124	3.281	-2.838	6.4306	0.011217	0.12053	LOC121876124	uncharacterized LOC121876124
121855267	-0.8636	0.61723	6.4249	0.011253	0.12082	LOC121855267	R-spondin-1-like
121864901	-0.46422	6.7563	6.4242	0.011257	0.12082	LOC121864901	rab11 family-interacting protein 4-like, transcript variant X2
121867047	-1.365	-0.34686	6.416	0.01131	0.12131	LOC121867047	uncharacterized LOC121867047
121866286	2.5584	-2.8139	6.4091	0.011354	0.12171	LOC121866286	protein roadkill-like
121856275	-0.56204	6.3649	6.4018	0.0114	0.12207	LOC121856275	solute carrier family 41 member 1-like, transcript variant X3
121874491	0.58703	3.5702	6.4018	0.011401	0.12207	LOC121874491	uncharacterized LOC121874491
121864896	-0.66474	4.828	6.3968	0.011433	0.12234	LOC121864896	uncharacterized LOC121864896, transcript variant X6
121872958	0.84625	1.0399	6.3924	0.011461	0.12257	LOC121872958	uncharacterized LOC121872958, transcript variant X1
121855978	0.613	2.3476	6.3843	0.011513	0.12304	LOC121855978	serine/threonine/tyrosine-interacting protein B-like
121876855	-0.62948	4.1014	6.3835	0.011519	0.12304	LOC121876855	transient receptor potential cation channel subfamily A member 1 homolog, transcript variant X1
121879667	-0.5065	6.7681	6.3766	0.011563	0.12344	LOC121879667	myosin-VIIa-like, transcript variant X6
121880307	-0.51415	3.9355	6.3751	0.011573	0.12347	LOC121880307	fatty-acid amide hydrolase 2-like
121875459	-0.86626	2.7135	6.3656	0.011635	0.12406	LOC121875459	transcription factor SOX-8-like, transcript variant X2
121863289	0.95568	5.6127	6.363	0.011653	0.12417	LOC121863289	glycine-rich cell wall structural protein 1-like, transcript variant X1
121870680	-0.69694	1.9206	6.3606	0.011668	0.12426	LOC121870680	galactosylceramide sulfotransferase-like, transcript variant X2
121877664	-2.881	-2.5969	6.3588	0.01168	0.12432	LOC121877664	uncharacterized LOC121877664, transcript variant X1
121875625	-0.53609	6.0798	6.3557	0.0117	0.12446	LOC121875625	probable very-long-chain enoyl-CoA reductase art-1
121859615	-0.77658	4.5008	6.3516	0.011728	0.12468	LOC121859615	tribbles homolog 2-like
121865403	-0.53812	4.4108	6.348	0.011751	0.12485	LOC121865403	ribosomal protein S6 kinase alpha-5-like, transcript variant X3
121854337	-0.73988	2.4822	6.3442	0.011776	0.12504	LOC121854337	alpha-L-fucosidase-like, transcript variant X2
121873045	-1.7887	-2.391	6.3404	0.011802	0.12525	LOC121873045	tyrosine-protein kinase Yes-like
121877162	0.98015	0.099591	6.3393	0.011809	0.12525	LOC121877162	barH-like 1 homeobox protein
121854798	-1.5681	-0.70214	6.3363	0.011829	0.12538	LOC121854798	monocarboxylate transporter 12-like
121860189	-1.7626	0.06739	6.3202	0.011937	0.12639	LOC121860189	lipase 3-like, transcript variant X2
121868141	-0.52407	5.0196	6.3201	0.011938	0.12639	LOC121868141	uncharacterized LOC121868141
121877515	-3.202	-3.0974	6.3175	0.011955	0.12649	LOC121877515	splicing factor 3A subunit 2-like
121857054	-1.1643	-0.15625	6.3118	0.011994	0.12683	LOC121857054	uncharacterized LOC121857054
121867112	-1.1109	0.49853	6.3105	0.012003	0.12685	LOC121867112	putative uncharacterized protein DDB_G0271606
121854447	-0.92714	0.49439	6.3046	0.012043	0.12713	LOC121854447	uncharacterized LOC121854447, transcript variant X2
121860822	-0.7952	2.0774	6.3037	0.012048	0.12713	LOC121860822	fatty-acid amide hydrolase 2-like, transcript variant X1
121864180	0.98016	1.9209	6.3034	0.012051	0.12713	LOC121864180	diacylglycerol kinase eta-like, transcript variant X1
121876988	-0.62535	5.8402	6.2933	0.012119	0.12778	LOC121876988	phosphonoacetaldehyde hydrolase-like, transcript variant X3
121873014	-0.45878	5.6914	6.2901	0.012141	0.12791	LOC121873014	mitochondrial proton/calcium exchanger protein-like, transcript variant X1
121864484	-0.96364	-0.036131	6.2895	0.012146	0.12791	LOC121864484	uncharacterized LOC121864484
121871300	2.64	-2.589	6.2837	0.012185	0.12825	LOC121871300	kelch-like protein 40
121869532	0.80399	1.6172	6.2649	0.012315	0.12954	LOC121869532	carboxylesterase 1E-like, transcript variant X2
121878565	-0.61858	7.4231	6.2565	0.012374	0.13008	LOC121878565	chitin synthase chs-2-like, transcript variant X8
121861475	-0.66628	5.2676	6.2506	0.012415	0.13044	LOC121861475	bone morphogenetic protein 2-like, transcript variant X1
121856727	-0.45299	6.1706	6.2387	0.012499	0.13124	LOC121856727	xaa-Pro dipeptidase-like
121870309	-1.7181	-1.4722	6.2351	0.012524	0.13143	LOC121870309	uncharacterized LOC121870309
121863557	1.5835	-1.6868	6.2337	0.012534	0.13146	LOC121863557	cuticle protein AMP1A-like
121855936	1.2243	5.3728	6.2109	0.012697	0.13309	LOC121855936	proline-rich protein 2-like
121872990	-0.63031	10.436	6.2076	0.01272	0.13326	LOC121872990	MFS-type transporter SLC18B1-like
121854921	-3.4401	-2.9908	6.2011	0.012767	0.13366	LOC121854921	uncharacterized LOC121854921
121879051	0.77416	5.3984	6.1927	0.012828	0.13415	LOC121879051	uncharacterized LOC121879051
121855482	0.66988	2.6517	6.1926	0.012828	0.13415	LOC121855482	putative mediator of RNA polymerase II transcription subunit 26, transcript variant X2
121868865	-0.84285	0.36953	6.1865	0.012873	0.13454	LOC121868865	serine protease svh-1-like
121879072	-0.53032	6.2388	6.1843	0.012889	0.13462	LOC121879072	uncharacterized threonine-rich GPI-anchored glycoprotein PJ4664.02-like, transcript variant X1
121873466	-1.4184	1.2179	6.1795	0.012924	0.13492	LOC121873466	large subunit ribosomal RNA
121856587	-0.74163	2.3113	6.174	0.012964	0.13526	LOC121856587	vascular endothelial growth factor receptor 1-like
121869050	-0.89193	1.8073	6.1689	0.013001	0.13548	LOC121869050	uncharacterized LOC121869050
121865702	-0.90555	1.4377	6.1682	0.013007	0.13548	LOC121865702	ATP-dependent RNA helicase DEAH12, chloroplastic-like
121878033	2.9154	-2.8277	6.168	0.013008	0.13548	LOC121878033	uncharacterized protein DKFZp434B061-like
121853088	-0.60676	3.3359	6.1603	0.013065	0.13593	LOC121853088	palmitoleoyl-protein carboxylesterase NOTUM-like, transcript variant X1
121864430	2.8684	-2.7573	6.16	0.013067	0.13593	LOC121864430	uncharacterized LOC121864430
121864605	0.53328	4.9919	6.1586	0.013078	0.13597	LOC121864605	torso-like protein, transcript variant X6
121863976	1.3261	5.4895	6.1364	0.013242	0.1376	LOC121863976	uncharacterized LOC121863976
121864049	-0.90302	0.43344	6.1345	0.013257	0.13767	LOC121864049	G-protein coupled receptor moody-like
121857335	-1.201	0.81583	6.132	0.013275	0.13778	LOC121857335	uncharacterized LOC121857335, transcript variant X1
121870599	-2.8862	-2.7054	6.1128	0.01342	0.13919	LOC121870599	maternal embryonic leucine zipper kinase-like
121867707	0.59032	3.9776	6.1114	0.013431	0.13919	LOC121867707	uncharacterized LOC121867707
121858050	3.3247	-3.0931	6.111	0.013435	0.13919	LOC121858050	extensin-3-like
121868324	-0.60783	3.6738	6.105	0.01348	0.13959	LOC121868324	uncharacterized LOC121868324, transcript variant X1
121868895	-0.94843	5.9421	6.1015	0.013507	0.13978	LOC121868895	uncharacterized LOC121868895, transcript variant X3
121867015	-2.6364	-0.75124	6.0924	0.013576	0.14042	LOC121867015	uncharacterized LOC121867015, transcript variant X2
121855155	-1.307	0.23822	6.0883	0.013608	0.14066	LOC121855155	protein NipSnap homolog 3A-like
121873425	-1.2812	-1.4375	6.0846	0.013637	0.14088	LOC121873425	glutamate receptor ionotropic, delta-2-like
121857700	0.44158	5.4328	6.0785	0.013684	0.14128	LOC121857700	ubiquitin-like protein 7
121877266	-0.89485	3.5083	6.0591	0.013835	0.14276	LOC121877266	uncharacterized LOC121877266
121855847	-0.48046	8.0331	6.0574	0.013848	0.14282	LOC121855847	tumor protein p53-inducible nuclear protein 2-like, transcript variant X2
121876260	1.3429	2.5375	6.0552	0.013866	0.14292	LOC121876260	uncharacterized LOC121876260
121878716	-0.65149	2.666	6.0535	0.013878	0.14297	LOC121878716	uncharacterized LOC121878716
121873003	-1.9724	-1.6447	6.0499	0.013907	0.14317	LOC121873003	uncharacterized LOC121873003
121861178	3.267	-2.6256	6.0481	0.013921	0.14317	LOC121861178	kelch-like protein diablo
121876243	1.2669	-1.4391	6.0472	0.013928	0.14317	LOC121876243	uncharacterized LOC121876243
121858738	-0.45903	7.1173	6.0469	0.01393	0.14317	LOC121858738	GTP-binding protein SAR1b-like, transcript variant X1
121875862	-3.9134	-2.0881	6.0455	0.013941	0.1432	LOC121875862	dynein axonemal heavy chain 3-like, transcript variant X3
121872552	0.7917	2.3588	6.0414	0.013974	0.14346	LOC121872552	sodium/potassium/calcium exchanger Nckx30C-like, transcript variant X5
121866875	-2.7026	-1.7044	6.0378	0.014003	0.14363	LOC121866875	creatinase-like
121873859	-0.76266	8.2036	6.0373	0.014007	0.14363	LOC121873859	uncharacterized LOC121873859, transcript variant X1
121868585	-0.69503	1.7072	6.0353	0.014023	0.14371	LOC121868585	uncharacterized LOC121868585, transcript variant X2
121877409	1.9136	-2.0398	6.0305	0.01406	0.14401	LOC121877409	probable glutamate receptor
121872951	-3.1424	-3.134	6.0252	0.014103	0.14437	LOC121872951	nucleolin 2-like
121879218	0.70218	1.8962	6.0235	0.014117	0.14443	LOC121879218	gastrula zinc finger protein XlCGF57.1-like
121867158	1.4215	3.7631	6.0084	0.014238	0.14559	LOC121867158	cuticle protein AMP3
121853763	0.53546	4.1484	5.9978	0.014324	0.14638	LOC121853763	uncharacterized LOC121853763
121865712	-0.47459	7.8107	5.9874	0.014409	0.14716	LOC121865712	TSC22 domain family protein 1-like, transcript variant X2
121868419	0.7434	1.8647	5.9831	0.014443	0.14743	LOC121868419	uncharacterized LOC121868419
121879181	-2.4212	-1.1627	5.975	0.01451	0.14803	LOC121879181	DNA ligase 1-like
121873970	0.44983	5.038	5.9682	0.014566	0.14849	LOC121873970	uncharacterized LOC121873970
121862480	-0.62341	5.3267	5.9675	0.014572	0.14849	LOC121862480	unconventional myosin ID-like
121858588	-0.74391	3.9025	5.9647	0.014595	0.14865	LOC121858588	beta-glucuronidase-like, transcript variant X2
121874734	1.5237	-0.7382	5.9542	0.014682	0.1494	LOC121874734	cuticle protein 7-like
121874273	-0.44256	7.0297	5.9537	0.014686	0.1494	LOC121874273	lysosomal aspartic protease-like
121867046	-0.73174	5.1271	5.9519	0.014702	0.14947	LOC121867046	uncharacterized LOC121867046, transcript variant X2
121871218	-0.73336	5.5285	5.9495	0.014722	0.14959	LOC121871218	calcium-independent phospholipase A2-gamma-like
121856902	0.7946	3.0098	5.948	0.014734	0.14963	LOC121856902	uncharacterized LOC121856902
121871093	0.96561	5.3231	5.9459	0.014752	0.14972	LOC121871093	cuticle protein AM1159-like
121878334	-0.75899	7.5897	5.9444	0.014764	0.14972	LOC121878334	nascent polypeptide-associated complex subunit alpha, muscle-specific form-like, transcript variant X2
121870162	-1.6254	-1.2903	5.944	0.014768	0.14972	LOC121870162	polyubiquitin-like
121880029	-0.7092	1.6915	5.9361	0.014834	0.1503	LOC121880029	uncharacterized LOC121880029
121855839	-0.56889	4.4206	5.9283	0.014899	0.15088	LOC121855839	forkhead box protein O-like
121865170	-0.74625	2.0814	5.9193	0.014976	0.15158	LOC121865170	2-aminoethanethiol dioxygenase-like, transcript variant X2
121875754	-0.49322	3.9911	5.9058	0.015091	0.15266	LOC121875754	ketimine reductase mu-crystallin-like
121861570	3.2194	-2.7291	5.9044	0.015103	0.15269	LOC121861570	uncharacterized LOC121861570
121868307	0.64638	6.3571	5.8969	0.015168	0.15324	LOC121868307	solute carrier family 66 member 3-like
121870771	-0.62415	3.4432	5.8961	0.015175	0.15324	LOC121870771	uncharacterized LOC121870771, transcript variant X2
121875460	-2.5538	-2.9872	5.892	0.01521	0.15351	LOC121875460	basic salivary proline-rich protein 2-like
121853764	-0.82244	0.8033	5.8893	0.015233	0.15366	LOC121853764	protein spaetzle-like
121868310	-0.83476	3.6914	5.8849	0.015272	0.15396	LOC121868310	facilitated trehalose transporter Tret1-like, transcript variant X1
121857403	1.0321	1.4385	5.8821	0.015295	0.15411	LOC121857403	heparan sulfate 2-O-sulfotransferase 1-like
121864865	-2.9848	-2.5504	5.8751	0.015356	0.15464	LOC121864865	uncharacterized LOC121864865
121866564	2.4498	-3.1091	5.8741	0.015365	0.15465	LOC121866564	proline-rich receptor-like protein kinase PERK14
121870076	-1.1053	0.58211	5.8694	0.015406	0.15497	LOC121870076	uncharacterized LOC121870076, transcript variant X2
121871149	-2.1735	-2.1049	5.8675	0.015423	0.15497	LOC121871149	proline-rich extensin-like protein EPR1
121859369	-0.9854	3.6348	5.8664	0.015433	0.15497	LOC121859369	uncharacterized LOC121859369
121874402	-2.2462	1.1552	5.8663	0.015433	0.15497	LOC121874402	sterol carrier protein 2-like
121862224	-0.57194	4.5726	5.8655	0.01544	0.15497	LOC121862224	uncharacterized LOC121862224
121874718	1.0132	1.4391	5.8613	0.015478	0.15525	LOC121874718	uncharacterized LOC121874718, transcript variant X1
121866527	2.77	-3.08	5.8542	0.01554	0.15579	LOC121866527	synaptonemal complex protein 2-like
121872885	-0.5052	4.5536	5.853	0.015551	0.15581	LOC121872885	D-serine dehydratase-like, transcript variant X3
121874916	-1.3609	1.0297	5.8377	0.015686	0.15708	LOC121874916	low-density lipoprotein receptor-like
121873558	1.2059	-1.1442	5.835	0.01571	0.15723	LOC121873558	repetin-like
121868066	0.61259	3.4881	5.8256	0.015795	0.1579	LOC121868066	uncharacterized LOC121868066
121859042	-0.76251	1.7411	5.8256	0.015795	0.1579	LOC121859042	uncharacterized LOC121859042
121871126	2.8397	-2.9681	5.8172	0.01587	0.15854	LOC121871126	uncharacterized LOC121871126
121874854	1.3217	4.0825	5.8152	0.015888	0.15854	LOC121874854	fibroin heavy chain-like
121877189	0.51987	4.1043	5.8147	0.015893	0.15854	LOC121877189	DNA replication factor Cdt1-like, transcript variant X1
121863555	1.0292	0.14659	5.8142	0.015897	0.15854	LOC121863555	cuticle protein AMP1A-like, transcript variant X1
121876967	-0.74472	3.4028	5.8126	0.015912	0.15854	LOC121876967	uncharacterized LOC121876967
121853664	1.1258	3.3669	5.8126	0.015912	0.15854	LOC121853664	actin-like, transcript variant X1
121855994	-0.48322	5.005	5.8115	0.015922	0.15856	LOC121855994	ester hydrolase C11orf54 homolog
121859963	1.0664	1.5906	5.8092	0.015942	0.15867	LOC121859963	dynein axonemal heavy chain 3-like
121869052	-0.44895	6.6334	5.7992	0.016034	0.15949	LOC121869052	KN motif and ankyrin repeat domain-containing protein 1-like, transcript variant X1
121878101	2.5416	-2.9029	5.7979	0.016045	0.15952	LOC121878101	collagen alpha-1(X) chain-like
121859621	-2.4888	-2.3931	5.7948	0.016074	0.15971	LOC121859621	uncharacterized LOC121859621, transcript variant X1
121877557	-0.49803	3.6912	5.7926	0.016094	0.15982	LOC121877557	organic solute transporter subunit alpha-like, transcript variant X1
121853676	-0.66154	3.3768	5.7785	0.016223	0.16102	LOC121853676	dormancy-associated protein 2-like, transcript variant X1
121874269	-0.51738	3.3404	5.7722	0.016281	0.16151	LOC121874269	protein Wnt-6-like
121858377	0.98866	-0.21333	5.7636	0.016362	0.16222	LOC121858377	uncharacterized LOC121858377
121853679	-1.3147	4.2231	5.7542	0.016449	0.16299	LOC121853679	histidine-rich glycoprotein-like
121870040	-0.73415	2.4037	5.7456	0.01653	0.1637	LOC121870040	uncharacterized LOC121870040
121867710	0.78228	12.668	5.7428	0.016556	0.16387	LOC121867710	myosin regulatory light chain 2-like
121861531	0.59429	3.0984	5.7412	0.016572	0.16394	LOC121861531	transcriptional adapter 2-alpha-like, transcript variant X1
121860629	2.6312	-2.8796	5.7382	0.016599	0.16407	LOC121860629	uncharacterized LOC121860629
121855700	-2.1713	-2.448	5.7378	0.016604	0.16407	LOC121855700	pro-resilin-like
121865192	0.49625	5.5254	5.7347	0.016633	0.16427	LOC121865192	DNA (cytosine-5)-methyltransferase PliMCI-like, transcript variant X1
121853550	-0.45946	7.1993	5.7318	0.01666	0.16438	LOC121853550	death-associated inhibitor of apoptosis 2-like, transcript variant X3
121865554	-2.9841	-2.7535	5.7316	0.016662	0.16438	LOC121865554	rac guanine nucleotide exchange factor JJ-like
121880102	0.92961	5.6007	5.7281	0.016695	0.16462	LOC121880102	U-scoloptoxin(01)-Cw1a-like
121864924	0.58447	4.6786	5.7252	0.016723	0.16479	LOC121864924	uncharacterized LOC121864924
121873146	-3.2269	-2.9415	5.7233	0.016742	0.16489	LOC121873146	acetyl-CoA acetyltransferase, mitochondrial-like
121853541	-0.74611	4.7118	5.7111	0.016858	0.16594	LOC121853541	arf-GAP with dual PH domain-containing protein 1-like, transcript variant X3
121853117	-1.955	-2.0762	5.708	0.016888	0.16615	LOC121853117	uncharacterized LOC121853117
121875049	-0.73205	1.082	5.7034	0.016932	0.16649	LOC121875049	uncharacterized LOC121875049, transcript variant X2
121875931	-1.3749	0.41007	5.6937	0.017026	0.16732	LOC121875931	uncharacterized LOC121875931
121880192	0.56797	5.139	5.6913	0.017049	0.1674	LOC121880192	uncharacterized LOC121880192, transcript variant X3
121860681	0.6862	2.3183	5.691	0.017052	0.1674	LOC121860681	uncharacterized LOC121860681
121856338	-0.6615	3.8296	5.6894	0.017067	0.16744	LOC121856338	peptidoglycan-recognition protein SC2-like, transcript variant X2
121872463	-1.4112	1.9878	5.6879	0.017082	0.16744	LOC121872463	Krueppel-like factor 5
121855378	1.0755	0.42199	5.6877	0.017084	0.16744	LOC121855378	short stature homeobox protein 2-like
121870003	-0.49863	5.5826	5.6833	0.017127	0.16777	LOC121870003	solute carrier family 26 member 6-like, transcript variant X2
121865526	0.76013	1.7898	5.6823	0.017137	0.16777	LOC121865526	proton-coupled folate transporter-like
121862829	1.7099	1.5518	5.6792	0.017167	0.16797	LOC121862829	ctenidin-3-like
121856351	-0.57707	5.322	5.6768	0.017191	0.16812	LOC121856351	uncharacterized LOC121856351
121858645	-0.51598	5.3444	5.6739	0.017219	0.16816	LOC121858645	transducin beta-like protein 2, transcript variant X2
121866190	-1.0981	4.7006	5.6738	0.017221	0.16816	LOC121866190	uncharacterized LOC121866190
121855571	-2.5318	-3.0357	5.6734	0.017224	0.16816	LOC121855571	uncharacterized LOC121855571
121867108	-2.0938	-2.4814	5.6708	0.01725	0.16832	LOC121867108	trimeric autotransporter adhesin AtaA-like
121866410	-0.70332	1.8974	5.6687	0.017271	0.16844	LOC121866410	uncharacterized LOC121866410
121862553	-0.88094	-0.032975	5.6603	0.017353	0.16915	LOC121862553	ectonucleoside triphosphate diphosphohydrolase 5-like
121872612	-0.8876	0.23868	5.6474	0.017481	0.1703	LOC121872612	neurotrophin 1-like, transcript variant X1
121864877	0.96556	2.078	5.6455	0.0175	0.17032	LOC121864877	uncharacterized LOC121864877
121876066	-0.70275	4.4601	5.6454	0.017502	0.17032	LOC121876066	endoplasmic reticulum-Golgi intermediate compartment protein 3-like, transcript variant X1
121867335	-0.62907	4.9428	5.642	0.017535	0.17051	LOC121867335	leucine-rich repeat protein soc-2 homolog, transcript variant X1
121878331	-0.43769	5.0505	5.6415	0.017541	0.17051	LOC121878331	uncharacterized LOC121878331
121854874	-0.91063	1.6643	5.636	0.017596	0.17087	LOC121854874	glutamate carboxypeptidase 2-like
121858202	0.52839	4.3811	5.6359	0.017597	0.17087	LOC121858202	uncharacterized LOC121858202, transcript variant X2
121859044	-2.9908	-3.0569	5.6337	0.017619	0.171	LOC121859044	uncharacterized LOC121859044
121862768	-0.49145	3.8697	5.6295	0.017661	0.17131	LOC121862768	phytanoyl-CoA dioxygenase, peroxisomal-like
121853999	0.70019	3.3786	5.6273	0.017683	0.17143	LOC121853999	mediator of RNA polymerase II transcription subunit 27-like
121863590	-0.92018	0.24077	5.6229	0.017728	0.17177	LOC121863590	coiled-coil domain-containing protein 191-like
121878743	0.81007	1.3121	5.6168	0.017789	0.17226	LOC121878743	urea transporter 1-like
121866067	2.167	-2.5837	5.6152	0.017805	0.17226	LOC121866067	uncharacterized LOC121866067
121878841	0.82421	9.3851	5.6151	0.017807	0.17226	LOC121878841	angiomotin-like
121875772	-0.74071	4.291	5.6127	0.017831	0.1724	LOC121875772	peroxisomal multifunctional enzyme type 2-like, transcript variant X3
121876873	-0.96767	2.0073	5.603	0.01793	0.17326	LOC121876873	spondin-2-like, transcript variant X1
121856388	-0.45219	7.0135	5.6005	0.017955	0.17342	LOC121856388	plastin-3-like, transcript variant X1
121854634	-2.5094	-2.9195	5.5988	0.017973	0.17349	LOC121854634	RNA-binding protein 33-like
121876654	-1.1516	-0.60863	5.5853	0.018112	0.17472	LOC121876654	uncharacterized LOC121876654
121853931	-1.074	1.2046	5.5845	0.01812	0.17472	LOC121853931	uncharacterized LOC121853931, transcript variant X2
121861042	-1.2812	5.596	5.5794	0.018173	0.17514	LOC121861042	uncharacterized LOC121861042
121857170	-0.47796	4.0356	5.5715	0.018255	0.17584	LOC121857170	bublin coiled-coil protein-like
121864839	0.80218	7.6157	5.5697	0.018274	0.17593	LOC121864839	glycine-rich protein 5-like
121869028	-0.56555	4.9262	5.5661	0.018312	0.1762	LOC121869028	1-acylglycerol-3-phosphate O-acyltransferase Pnpla3-like, transcript variant X3
121868163	2.7311	-3.1473	5.556	0.018417	0.17695	LOC121868163	sialidase-like
121855684	-0.64129	1.6655	5.5557	0.01842	0.17695	LOC121855684	large subunit ribosomal RNA
121861408	-0.47113	8.6019	5.5555	0.018423	0.17695	LOC121861408	phosphatidate phosphatase LPIN3-like, transcript variant X4
121860190	-0.42738	5.6255	5.5549	0.018429	0.17695	LOC121860190	protein sprouty homolog 2-like
121873432	0.48357	4.8989	5.5506	0.018475	0.17729	LOC121873432	unconventional prefoldin RPB5 interactor 1-like, transcript variant X1
121858709	-0.90411	2.2123	5.5397	0.01859	0.1783	LOC121858709	protein bicaudal C homolog 1-like
121863712	0.4526	5.1638	5.5347	0.018643	0.17872	LOC121863712	DNA polymerase delta catalytic subunit-like, transcript variant X1
121861200	0.46577	6.0795	5.5324	0.018668	0.17886	LOC121861200	DNA mismatch repair protein Msh2-like, transcript variant X3
121871202	-0.53753	2.678	5.53	0.018693	0.179	LOC121871202	location of vulva defective 1-like, transcript variant X2
121873017	0.58895	6.4967	5.5286	0.018708	0.17905	LOC121873017	pollen-specific leucine-rich repeat extensin-like protein 2, transcript variant X1
121861672	-0.43769	5.3423	5.5266	0.01873	0.17916	LOC121861672	serine/threonine-protein kinase pim-1-like
121863094	-0.60464	7.3383	5.5256	0.018741	0.17917	LOC121863094	basic proline-rich protein-like, transcript variant X3
121878227	0.7147	3.1513	5.523	0.018768	0.17933	LOC121878227	PHD finger-like domain-containing protein 5A
121865299	1.6448	-1.9516	5.5205	0.018795	0.1795	LOC121865299	early growth response protein 1-like
121857823	0.47935	5.9548	5.5154	0.01885	0.17993	LOC121857823	uncharacterized LOC121857823
121862337	-0.46353	5.256	5.5113	0.018894	0.18025	LOC121862337	uncharacterized LOC121862337, transcript variant X2
121866823	-2.4654	-0.89677	5.5104	0.018904	0.18025	LOC121866823	solute carrier family 22 member 5-like, transcript variant X2
121857558	-2.0345	-2.0627	5.5082	0.018928	0.18038	LOC121857558	uncharacterized LOC121857558
121861456	0.9225	6.8739	5.5026	0.018988	0.18086	LOC121861456	uncharacterized LOC121861456
121871484	0.69907	2.1306	5.4924	0.0191	0.18183	LOC121871484	uncharacterized LOC121871484
121859041	-3.1437	-2.9201	5.488	0.019147	0.18218	LOC121859041	uncharacterized LOC121859041
121867066	0.89634	8.9157	5.4827	0.019205	0.18264	LOC121867066	cuticle protein AM1159-like
121857429	-2.6331	-0.044953	5.4749	0.019292	0.18336	LOC121857429	O-acyltransferase like protein-like
121856245	-0.54695	5.1939	5.4659	0.019391	0.18421	LOC121856245	N-acetylglucosamine-6-phosphate deacetylase-like
121856925	-0.98985	-0.40444	5.4548	0.019515	0.18529	LOC121856925	uncharacterized LOC121856925, transcript variant X1
121856924	-2.1683	-2.4191	5.4489	0.01958	0.18579	LOC121856924	uncharacterized LOC121856924
121858898	-2.5409	-1.8195	5.4482	0.019588	0.18579	LOC121858898	uncharacterized LOC121858898, transcript variant X2
121872945	0.71177	4.5579	5.4461	0.019612	0.18592	LOC121872945	uncharacterized LOC121872945, transcript variant X2
121861191	-1.3061	-1.8611	5.4412	0.019667	0.18634	LOC121861191	glutamate receptor ionotropic, delta-1-like
121867390	-2.2218	-1.3812	5.4356	0.01973	0.18684	LOC121867390	uncharacterized LOC121867390
121859584	-1.0646	0.35289	5.4239	0.019863	0.18797	LOC121859584	putative protein TPRXL
121875416	2.7751	-2.9669	5.4233	0.01987	0.18797	LOC121875416	peregrin-like
121855524	0.52756	6.7083	5.4167	0.019945	0.18848	LOC121855524	U-scoloptoxin(01)-Cw1a-like
121860227	-2.0235	-2.4501	5.4167	0.019945	0.18848	LOC121860227	uncharacterized LOC121860227
121878340	0.6739	2.8898	5.4016	0.020118	0.19001	LOC121878340	sulfotransferase 1A1-like, transcript variant X2
121874640	-0.57263	3.4557	5.399	0.020148	0.19019	LOC121874640	juvenile hormone esterase-like
121871572	0.67683	0.94204	5.3968	0.020173	0.19033	LOC121871572	uncharacterized LOC121871572, transcript variant X2
121868600	-0.49035	4.2724	5.3908	0.020243	0.19089	LOC121868600	solute carrier family 28 member 3-like
121875063	-0.70033	4.7423	5.3858	0.020301	0.19134	LOC121875063	protein charybde-like
121854633	-2.8992	-3.1006	5.3832	0.020331	0.19152	LOC121854633	histidine-rich glycoprotein-like
121853726	-1.1789	3.6855	5.3716	0.020467	0.1927	LOC121853726	facilitated trehalose transporter Tret1-like
121864817	0.94833	3.1522	5.3684	0.020505	0.19292	LOC121864817	glycine-rich protein 5-like
121867777	-0.60308	2.9773	5.3678	0.020512	0.19292	LOC121867777	uncharacterized LOC121867777
121863432	-2.6862	-2.8534	5.3649	0.020546	0.19313	LOC121863432	nuclear pore complex-interacting protein family member B12-like
121866229	1.7411	-1.8206	5.3628	0.020571	0.19327	LOC121866229	mucin-2-like
121876945	2.692	1.5471	5.3557	0.020655	0.19392	LOC121876945	keratin, type I cytoskeletal 10-like
121878214	-0.43972	4.8687	5.3551	0.020661	0.19392	LOC121878214	ras-related protein ced-10-like, transcript variant X2
121861424	0.64719	3.4665	5.3542	0.020673	0.19392	LOC121861424	uncharacterized LOC121861424, transcript variant X2
121873914	1.5275	-2.0995	5.3529	0.020688	0.19397	LOC121873914	uncharacterized LOC121873914
121877487	-0.79617	3.3248	5.3489	0.020735	0.19431	LOC121877487	protein CREG1-like
121860553	0.79441	0.2636	5.3454	0.020777	0.19459	LOC121860553	uncharacterized LOC121860553, transcript variant X2
121870569	-0.93718	2.4044	5.341	0.020829	0.19498	LOC121870569	protein ZBED8-like
121870663	-0.45306	5.8201	5.3391	0.020852	0.19509	LOC121870663	all-trans-retinol 13,14-reductase-like, transcript variant X1
121877680	-0.76225	1.2712	5.3375	0.020871	0.19517	LOC121877680	uncharacterized LOC121877680
121855729	-3.1699	-2.155	5.3277	0.020989	0.19617	LOC121855729	mannan endo-1,4-beta-mannosidase-like, transcript variant X1
121870647	-0.68132	1.4985	5.3247	0.021025	0.19641	LOC121870647	uncharacterized LOC121870647
121868076	-0.61124	2.7776	5.3114	0.021187	0.19781	LOC121868076	uncharacterized LOC121868076
121853891	-1.0123	0.603	5.3064	0.021247	0.19828	LOC121853891	uncharacterized LOC121853891
121871413	0.42886	6.0026	5.3029	0.021291	0.19858	LOC121871413	prolyl endopeptidase-like, transcript variant X4
121855334	-1.0481	0.64285	5.2986	0.021343	0.19896	LOC121855334	mucin-5AC-like
121854292	0.4807	3.9682	5.2892	0.021459	0.19993	LOC121854292	carbohydrate sulfotransferase 11-like, transcript variant X1
121880486	-0.69182	1.8912	5.279	0.021585	0.20101	LOC121880486	dynein regulatory complex subunit 5-like, transcript variant X1
121874335	-1.0289	3.0557	5.2623	0.021792	0.20279	LOC121874335	uncharacterized LOC121874335
121867785	-0.54004	4.3128	5.2618	0.021799	0.20279	LOC121867785	uncharacterized protein CG5098-like
121855672	0.60605	3.2208	5.2588	0.021836	0.20303	LOC121855672	gastrula zinc finger protein XlCGF57.1-like, transcript variant X1
121862215	1.3242	5.549	5.2556	0.021876	0.2033	LOC121862215	uncharacterized LOC121862215
121861030	-0.54554	5.4992	5.2378	0.022101	0.20528	LOC121861030	carboxypeptidase B-like
121878127	0.78942	5.0406	5.2357	0.022128	0.20533	LOC121878127	uncharacterized LOC121878127
121866274	-0.41828	5.8394	5.2356	0.022129	0.20533	LOC121866274	sulfite oxidase-like
121856093	-0.49438	10.109	5.2347	0.02214	0.20533	LOC121856093	ribosome-binding protein 1-like, transcript variant X1
121878370	-0.43991	6.1845	5.2331	0.022161	0.20541	LOC121878370	protein SMG9-like, transcript variant X1
121866781	0.60024	12.191	5.2297	0.022204	0.20565	LOC121866781	troponin I, transcript variant X14
121870674	0.80791	-0.11332	5.229	0.022214	0.20565	LOC121870674	uncharacterized LOC121870674
121863549	-1.3935	0.65611	5.2284	0.022222	0.20565	LOC121863549	cuticle protein AMP1A-like, transcript variant X2
121856058	-0.48725	3.5071	5.2275	0.022232	0.20565	LOC121856058	choline kinase alpha-like
121858142	-2.4586	-2.639	5.223	0.022291	0.20608	LOC121858142	uncharacterized LOC121858142
121868491	-0.60762	2.2677	5.2192	0.022338	0.20641	LOC121868491	uncharacterized LOC121868491
121862533	1.5839	-0.30304	5.2184	0.022349	0.20641	LOC121862533	glycine-rich protein 5-like
121878068	-0.47623	3.5187	5.2154	0.022387	0.20658	LOC121878068	chitobiosyldiphosphodolichol beta-mannosyltransferase-like
121857563	0.93457	2.2137	5.2146	0.022398	0.20658	LOC121857563	glycine-rich cell wall structural protein-like
121857550	1.1146	-0.93883	5.2143	0.022402	0.20658	LOC121857550	uncharacterized LOC121857550, transcript variant X2
121862482	-1.7558	-2.5684	5.1984	0.022607	0.20837	LOC121862482	extensin-like
121859417	-0.46508	8.5405	5.1975	0.022619	0.20837	LOC121859417	influenza virus NS1A-binding protein homolog
121857899	-0.59859	4.6725	5.1928	0.02268	0.20879	LOC121857899	protein hairy-like, transcript variant X2
121866019	-2.9422	-3.2085	5.1918	0.022693	0.20879	LOC121866019	putative protein TPRXL
121869843	0.77981	1.2671	5.1913	0.0227	0.20879	LOC121869843	techylectin-5B-like
121863373	-1.1613	-1.5755	5.1885	0.022737	0.20902	LOC121863373	uncharacterized protein DDB_G0280315-like
121861832	-2.0525	-1.6261	5.187	0.022756	0.20909	LOC121861832	uncharacterized LOC121861832
121858250	-0.66394	1.0863	5.185	0.022782	0.20923	LOC121858250	pancreas transcription factor 1 subunit alpha-like
121865364	1.5686	-2.4523	5.1829	0.02281	0.20937	LOC121865364	protein piccolo-like
121863052	-0.64343	5.538	5.1786	0.022866	0.20978	LOC121863052	indole-3-acetaldehyde oxidase-like, transcript variant X1
121855777	3.2803	-2.705	5.1772	0.022885	0.20985	LOC121855777	large subunit ribosomal RNA
121864660	-0.43826	5.8424	5.1645	0.023053	0.21128	LOC121864660	uncharacterized LOC121864660
121858355	-1.9289	-1.0848	5.1586	0.023132	0.21189	LOC121858355	uncharacterized LOC121858355
121876225	0.54842	5.1981	5.157	0.023153	0.21198	LOC121876225	crustacean calcium-binding protein 23-like, transcript variant X2
121872889	0.49591	10.318	5.1371	0.02342	0.21421	LOC121872889	fructose-bisphosphate aldolase-like
121858828	-0.433	5.6264	5.137	0.023421	0.21421	LOC121858828	uncharacterized LOC121858828, transcript variant X4
121878598	0.85339	0.12781	5.1331	0.023474	0.21452	LOC121878598	zinc finger protein 362-like
121866920	-0.62154	3.34	5.1328	0.023478	0.21452	LOC121866920	solute carrier family 15 member 1-like, transcript variant X1
121868674	0.5368	2.9143	5.1279	0.023544	0.21501	LOC121868674	phospholipid-transporting ATPase ABCA3-like
121857661	0.6076	2.0208	5.124	0.023597	0.21538	LOC121857661	uncharacterized LOC121857661, transcript variant X3
121870836	-2.7966	-3.1303	5.1207	0.023642	0.21559	LOC121870836	uncharacterized LOC121870836
121874422	0.66383	8.1073	5.1206	0.023644	0.21559	LOC121874422	obscurin-like
121858231	0.81127	1.8184	5.1173	0.023688	0.21589	LOC121858231	glutathione peroxidase-like
121857157	0.66654	2.5138	5.1141	0.023733	0.21619	LOC121857157	U6 snRNA-associated Sm-like protein LSm8
121878842	1.6269	-1.7191	5.112	0.023761	0.21633	LOC121878842	uncharacterized LOC121878842
121857998	3.0108	-3.0297	5.1082	0.023813	0.2167	LOC121857998	kelch-like protein 3
121858244	-0.46492	5.4655	5.1031	0.023884	0.21723	LOC121858244	brain protein I3-like
121858640	-0.48674	4.1847	5.0865	0.024113	0.2192	LOC121858640	integrin alpha-IIb-like
121876763	-0.98398	1.3798	5.0752	0.02427	0.22052	LOC121876763	uncharacterized LOC121876763
121859954	0.60809	3.4039	5.0738	0.02429	0.22059	LOC121859954	uncharacterized LOC121859954
121854966	0.62667	2.4677	5.0692	0.024355	0.22106	LOC121854966	homeobox protein aristaless-like
121878155	0.57596	2.9215	5.0638	0.024431	0.22165	LOC121878155	mevalonyl-coenzyme A hydratase sidH-like, transcript variant X2
121875210	0.46682	4.944	5.0619	0.024457	0.22174	LOC121875210	exosome complex component RRP4-like, transcript variant X3
121867385	-1.4228	0.25109	5.0613	0.024466	0.22174	LOC121867385	ovochymase-2-like
121854193	-2.1061	-2.5881	5.0574	0.024521	0.22212	LOC121854193	pro-resilin-like, transcript variant X4
121853525	0.59996	5.3087	5.0547	0.02456	0.22225	LOC121853525	actin-like
121878064	0.88456	-0.25138	5.0546	0.02456	0.22225	LOC121878064	proclotting enzyme-like, transcript variant X2
121877269	0.65097	13.108	5.05	0.024625	0.22266	LOC121877269	myosin light chain 1, transcript variant X3
121857587	-0.73682	3.1882	5.0498	0.024629	0.22266	LOC121857587	mucin-19-like
121873172	-0.44341	5.8289	5.0486	0.024646	0.22269	LOC121873172	uncharacterized LOC121873172, transcript variant X1
121879049	1.6835	-1.2545	5.0474	0.024664	0.22274	LOC121879049	uncharacterized LOC121879049
121863229	-0.7034	3.8422	5.0445	0.024704	0.223	LOC121863229	homeobox protein dve-1-like, transcript variant X2
121857965	-1.56	-0.35947	5.043	0.024726	0.22308	LOC121857965	uncharacterized LOC121857965
121858632	-0.65359	3.9175	5.0323	0.02488	0.22435	LOC121858632	venom serine protease Bi-VSP-like, transcript variant X2
121873061	2.9603	-3.1533	5.0214	0.025036	0.22519	LOC121873061	stress protein DDR48-like
121868410	-1.2617	-1.4534	5.0212	0.025039	0.22519	LOC121868410	uncharacterized LOC121868410
121863853	-0.74602	1.4169	5.0211	0.02504	0.22519	LOC121863853	mucin-5AC-like, transcript variant X1
121857122	2.3912	-3.0791	5.0209	0.025044	0.22519	LOC121857122	methyl farnesoate epoxidase-like
121870474	0.58637	2.6469	5.0196	0.025062	0.22519	LOC121870474	uncharacterized LOC121870474
121873875	-0.44128	4.1971	5.0195	0.025063	0.22519	LOC121873875	serine/threonine-protein kinase NIM1-like
121859340	0.8868	1.0154	5.0191	0.025069	0.22519	LOC121859340	GTP-binding protein REM 1-like
121854125	0.58637	2.6469	5.0188	0.025073	0.22519	LOC121854125	uncharacterized LOC121854125
121855169	0.60683	3.4015	5.0154	0.025122	0.22552	LOC121855169	uncharacterized LOC121855169
[truncated: 15,946 more rows]

## Sheet: DEA-POS-S
EntrezID	logFC	AveExpr	t	P.Value	adj.P.Val	B	Symbols	Name
s2f_0001499003	-3.689	2.9911	-14.355	1.3411e-11	1.4187e-07	15.771	ZFAND2A	an1-type zinc finger protein 2a
s2f_0144728001	5.9792	-1.6046	10.691	1.9338e-09	7.9631e-06	11.563	s2f_0144728001	serine/arginine repetitive matrix protein 1-like
s2f_0113049001	2.037	3.7373	10.589	2.2582e-09	7.9631e-06	11.426	s2f_0113049001	uncharacterized protein loc108676221
s2f_0144869001	2.1682	3.4502	8.7937	4.2677e-08	8.4471e-05	8.7668	s2f_0144869001	uncharacterized protein loc113807005 isoform x1
s2f_0000108009	1.9606	7.4222	8.5099	7.0348e-08	0.00010187	8.3054	DSIM_GD10375	2-hydroxyacylsphingosine 1-beta-galactosyltransferase-like
s2f_0000027007	1.672	8.025	8.3789	8.8906e-08	0.00010187	8.0885	s2f_0000027007	venom carboxylesterase-6-like
s2f_0000779006	1.956	9.4265	8.2983	1.028e-07	0.00010187	7.9536	s2f_0000779006	alpha,alpha-trehalose-phosphate synthase [udp-forming]-like
s2f_0144842001	4.4955	-2.2168	8.2817	1.0593e-07	0.00010187	7.9258	s2f_0144842001	basic salivary proline-rich protein 3-like isoform x1
s2f_0000239018	1.7091	4.6639	7.4649	4.8485e-07	0.00029139	6.5028	BMA-NHR-35	hepatocyte nuclear factor 4-gamma isoform x1
s2f_0382599001	3.5512	-2.1979	7.4138	5.3478e-07	0.00029635	6.4105	s2f_0382599001	uncharacterized protein loc121871363
s2f_0000647004	-2.0676	4.2828	-7.3897	5.6027e-07	0.00029635	6.3666	ALF1	hypothetical protein
s2f_0003177004	1.8667	6.3831	7.3185	6.4279e-07	0.00032381	6.2371	DSIM_GD22801	glucose-6-phosphatase 2-like
s2f_0000062040	1.8825	7.1639	7.142	9.066e-07	0.00038364	5.9123	CG15279	sodium-dependent nutrient amino acid transporter 1-like
s2f_0144592001	2.6583	-0.046541	7.0879	1.0084e-06	0.000393	5.8117	s2f_0144592001	uncharacterized protein loc113829128
s2f_0144753001	2.672	1.0504	6.9849	1.2357e-06	0.00045077	5.6192	s2f_0144753001	uncharacterized protein loc113826903
s2f_0008625001	2.3076	2.7101	6.8871	1.501e-06	0.00049622	5.4348	GPR119	glucose-dependent insulinotropic receptor
s2f_0000102010	2.0577	4.3315	6.7682	1.9046e-06	0.00057274	5.2088	ACS-12	luciferin 4-monooxygenase-like
s2f_0011926001	1.8436	5.0586	6.7465	1.9895e-06	0.00057274	5.1674	s2f_0011926001	thyroglobulin-like
s2f_0019194001	2.6034	3.76	6.7431	2.0032e-06	0.00057274	5.1609	AN02G08160	hypothetical protein
s2f_0000235001	2.1704	7.2393	6.6523	2.4067e-06	0.00063847	4.9864	UBP11	hypothetical protein
s2f_0001177006	1.6245	7.5624	6.6342	2.4966e-06	0.00063847	4.9515	COMTD1	catechol o-methyltransferase domain-containing protein 1
s2f_0017403001	2.1144	5.5651	6.627	2.5334e-06	0.00063847	4.9376	s2f_0017403001	ankyrin-1-like
s2f_0001779002	1.8389	7.0517	6.6267	2.5348e-06	0.00063847	4.9371	ACE	angiotensin-converting enzyme-like
s2f_0012449001	1.5304	7.2852	6.5988	2.6827e-06	0.00065826	4.8831	SYMBB.V1.2.028621.T1	(oist) -
s2f_0002293001	1.9062	6.143	6.4398	3.7132e-06	0.00080003	4.5735	ACL-4	glycerol-3-phosphate acyltransferase 3 isoform x1
s2f_0000004090	1.9614	7.337	6.4325	3.7694e-06	0.00080003	4.5592	s2f_0000004090	cytochrome p450 2l1-like
s2f_0144800001	3.1342	2.9663	6.4273	3.8095e-06	0.00080003	4.5491	s2f_0144800001	uncharacterized protein loc113805108 isoform x1
s2f_0000001160	2.6362	4.8327	6.3993	4.0359e-06	0.00080003	4.494	SP110	coagulation factor vii isoform x1
s2f_0002239004	1.5595	3.6556	6.3982	4.0445e-06	0.00080003	4.492	BMA-LFE-2	inositol-trisphosphate 3-kinase homolog isoform x1
s2f_0014224001	2.4704	0.76588	6.3092	4.8615e-06	0.00088673	4.3164	CTL6	trichohyalin isoform x1
s2f_0000010024	1.9015	2.1083	6.2891	5.0683e-06	0.00089539	4.2767	SLC2A13	proton myo-inositol cotransporter
s2f_0112997001	2.6869	2.4179	6.2881	5.0783e-06	0.00089539	4.2748	s2f_0112997001	uncharacterized protein loc108671093
s2f_0381135001	4.4296	-2.0058	6.2093	5.9833e-06	0.0010377	4.1182	s2f_0381135001	uncharacterized protein loc121859368
s2f_0381410001	3.8638	2.1008	6.1788	6.3762e-06	0.001088	4.0574	s2f_0381410001	uncharacterized protein loc121861847 isoform x1
s2f_0112807001	1.9999	4.4418	6.1688	6.5115e-06	0.0010934	4.0374	s2f_0112807001	uncharacterized protein loc113811209
s2f_0027698001	2.6509	9.2046	6.0752	7.922e-06	0.0012691	3.8499	s2f_0027698001	alpha-crystallin a chain-like
s2f_0000264010	1.7753	4.2133	6.0684	8.0373e-06	0.0012691	3.8361	GAL	beta-galactosidase-1-like protein 2
s2f_0000048026	1.9399	9.5485	6.0421	8.4935e-06	0.0013214	3.7833	BCP	cathepsin l1-like
s2f_0071062001	2.6748	2.7123	6.0335	8.6494e-06	0.0013261	3.7659	s2f_0071062001	uncharacterized protein loc121854692 isoform x1
s2f_0078426001	2.3037	3.8727	6.0023	9.2379e-06	0.0013961	3.7029	s2f_0078426001	flocculation protein flo5-like
s2f_0001787003	2.0097	4.224	5.9682	9.9273e-06	0.0014386	3.634	AGNB	piwi-like protein siwi
s2f_0144917001	4.4717	-1.8709	5.9613	1.0074e-05	0.0014402	3.6199	s2f_0144917001	uncharacterized protein loc113825683
s2f_0000805006	2.402	2.2844	5.9381	1.0581e-05	0.0014925	3.573	SI:CH73-234B20.5	vesicle-associated membrane protein 8-like
s2f_0076035001	2.7458	2.3371	5.9072	1.1298e-05	0.0015726	3.5102	s2f_0076035001	4-coumarate--coa ligase-like 5
s2f_0000178026	2.6865	4.6731	5.8721	1.2174e-05	0.0016281	3.4386	CG5966	pancreatic lipase-related protein 2-like
s2f_0000355003	2.3839	2.2675	5.8513	1.2723e-05	0.0016281	3.3964	USP31	ubiquitin carboxyl-terminal hydrolase 31
s2f_0005353001	2.0164	3.8198	5.85	1.2761e-05	0.0016281	3.3936	YEA4	udp-xylose and udp-n-acetylglucosamine transporter
s2f_0005138005	1.8216	5.6399	5.8426	1.2963e-05	0.0016281	3.3785	SYMBB.V1.2.031688.T1	(genbank) hypothetical protein
s2f_0000102021	1.7942	5.7845	5.8322	1.3253e-05	0.0016281	3.3573	ACSF2	acyl-coa synthetase family member 2, mitochondrial-like
s2f_0006700001	1.5475	3.6287	5.8286	1.3357e-05	0.0016281	3.3499	s2f_0006700001	n-acetylneuraminate lyase-like
s2f_0000009002	2.6711	2.3204	5.8059	1.4017e-05	0.0016661	3.3036	SRMS	tyrosine-protein kinase srms
s2f_0017979001	2.322	2.6156	5.7572	1.5558e-05	0.001789	3.2037	s2f_0017979001	(genbank) hypothetical protein
s2f_0000463011	2.3455	5.7587	5.751	1.5764e-05	0.0017932	3.1911	BM17567	hypothetical protein
s2f_0043391001	3.643	2.1458	5.7399	1.6144e-05	0.0018055	3.1682	s2f_0043391001	uncharacterized protein loc113819222
s2f_0002182005	2.294	4.9855	5.7195	1.6868e-05	0.0018397	3.1261	C01C4.3	serine/threonine-protein kinase meng-po
s2f_0000416017	2.8736	4.0689	5.7026	1.7489e-05	0.0018879	3.0915	ITGAE	integrin alpha-9-like
s2f_0002437001	3.7557	3.0733	5.6779	1.8446e-05	0.0019711	3.0404	MIOX	inositol oxygenase
s2f_0000578005	1.9152	5.382	5.6616	1.9104e-05	0.0020101	3.0068	CBR-DHS-19	epidermal retinol dehydrogenase 2-like
s2f_0006213008	2.7049	1.9537	5.6531	1.9455e-05	0.0020101	2.9893	s2f_0006213008	uncharacterized protein loc113799895
s2f_0113024001	2.506	1.8729	5.6504	1.9571e-05	0.0020101	2.9836	s2f_0113024001	uncharacterized protein loc113810121 isoform x1
s2f_0001908005	3.3313	-1.7192	5.619	2.0939e-05	0.0021075	2.9188	APOB	apolipoprotein b-100-like
s2f_0017505001	4.7631	-0.013797	5.6054	2.1563e-05	0.0021075	2.8906	AGABI1DRAFT_38713	hypothetical protein
s2f_0000622015	3.2486	0.9533	5.599	2.1862e-05	0.0021075	2.8774	s2f_0000622015	interferon regulatory factor 2-like
s2f_0071096001	2.6282	3.7582	5.5936	2.2119e-05	0.0021075	2.8662	s2f_0071096001	sortilin-related receptor-like
s2f_0000001134	2.3438	5.4436	5.5832	2.2625e-05	0.0021075	2.8445	TMPRSS5	trypsin-1-like
s2f_0080072001	2.5488	2.195	5.5801	2.2776e-05	0.0021075	2.8381	s2f_0080072001	uncharacterized protein loc113809929
s2f_0000246024	2.4845	2.6203	5.5796	2.2801e-05	0.0021075	2.8371	CG5096	leucine-rich repeat neuronal protein 3-like
s2f_0010642001	3.1792	5.7054	5.5788	2.284e-05	0.0021075	2.8354	CG9380	(genbank) conserved hypothetical protein
s2f_0000707001	2.4793	3.4248	5.5749	2.3033e-05	0.0021075	2.8274	BDH1	hypothetical protein
s2f_0001697002	2.8472	1.5277	5.5701	2.3273e-05	0.0021075	2.8174	BM2804	d-aspartate oxidase
s2f_0000611004	1.9055	5.1377	5.5667	2.3447e-05	0.0021075	2.8103	BM2608	n-acetylated-alpha-linked acidic dipeptidase 2-like
s2f_0045826001	1.7398	3.2705	5.5655	2.3507e-05	0.0021075	2.8078	s2f_0045826001	hypothetical protein
s2f_0383287001	1.9481	-0.52103	5.5511	2.425e-05	0.0021362	2.7779	s2f_0383287001	protein ycf2-like
s2f_0000180009	3.899	8.2243	5.5492	2.435e-05	0.0021362	2.774	CHT5	endochitinase
s2f_0077106001	2.6936	0.62169	5.5476	2.4433e-05	0.0021362	2.7707	s2f_0077106001	serine/threonine-protein phosphatase 6 regulatory ankyrin repeat subunit b-like
s2f_0000868011	3.506	0.55222	5.5276	2.5516e-05	0.0021761	2.7291	BM2047	phospholipase a2 a2-actitoxin-cgg2a-like
s2f_0000999003	1.9542	5.6507	5.525	2.566e-05	0.0021761	2.7237	SGMA	sphingomyelin phosphodiesterase-like
s2f_0005243001	1.5291	5.5397	5.5242	2.5707e-05	0.0021761	2.7219	AOP	ets dna-binding protein pokkuri
s2f_0015542001	4.2266	0.87955	5.5241	2.5712e-05	0.0021761	2.7218	CG30340	neuropeptide ff receptor 2
s2f_0144675001	3.761	-1.9086	5.5132	2.6329e-05	0.0022066	2.699	s2f_0144675001	sodium-dependent dopamine transporter-like
s2f_0112968001	-3.4536	0.93161	-5.4823	2.8153e-05	0.0023087	2.6347	s2f_0112968001	probable serine/threonine-protein kinase samkc
s2f_0052503001	3.3222	3.5331	5.4562	2.9799e-05	0.0024065	2.5802	s2f_0052503001	uncharacterized protein loc108676539
s2f_0113007001	3.0424	-0.90012	5.4339	3.1284e-05	0.0025056	2.5335	s2f_0113007001	uncharacterized protein loc113807286 isoform x1
s2f_0200628001	2.7756	1.7587	5.4307	3.15e-05	0.0025056	2.5269	s2f_0200628001	uncharacterized protein loc113805420
s2f_0093786001	3.1883	5.517	5.414	3.2673e-05	0.002576	2.4918	s2f_0093786001	uncharacterized protein loc108681479
s2f_0067819001	2.969	2.4835	5.4093	3.301e-05	0.002576	2.4819	s2f_0067819001	a disintegrin and metalloproteinase with thrombospondin motifs adt-1-like
s2f_0080122001	3.4127	2.1599	5.3476	3.777e-05	0.0028517	2.3526	s2f_0080122001	uncharacterized protein loc108679759
s2f_0001927006	2.2295	5.7316	5.3281	3.9418e-05	0.0029366	2.3116	AEP1	legumain-like
s2f_0015837001	3.051	1.708	5.3027	4.1678e-05	0.0030619	2.258	CG15865	(genbank) uncharacterized protein
s2f_0000357015	3.2725	2.5253	5.2963	4.2261e-05	0.0030833	2.2447	ACXA	adenylate cyclase type 2-like isoform x1
s2f_0000744008	1.5066	4.7647	5.2857	4.3258e-05	0.0031344	2.2223	BM6759	fatty-acid amide hydrolase 2
s2f_0000287017	2.7259	3.9889	5.2513	4.6658e-05	0.0033578	2.1496	TBX20	t-box transcription factor tbx20-like
s2f_0000012002	3.5956	2.539	5.2415	4.767e-05	0.0033935	2.129	SGK3	serine/threonine-protein kinase sgk3 isoform x1
s2f_0008053002	4.0664	1.2549	5.2403	4.7795e-05	0.0033935	2.1264	ANKRD6	ankyrin repeat domain-containing protein 6-like
s2f_0380424001	2.1332	0.74019	5.2339	4.8473e-05	0.0034186	2.1129	s2f_0380424001	uncharacterized protein loc121853869
s2f_0001399002	2.585	-2.1164	5.2206	4.9915e-05	0.003497	2.0847	KLF16	hypothetical protein
s2f_0000701007	3.0863	2.0108	5.1742	5.5286e-05	0.0037224	1.9866	s2f_0000701007	ileal sodium/bile acid cotransporter-like
s2f_0000001045	1.9923	4.3291	5.163	5.6668e-05	0.0037522	1.9628	OVCH2	ovochymase-2
s2f_0144737001	2.3816	2.8842	5.1624	5.6749e-05	0.0037522	1.9614	s2f_0144737001	uncharacterized protein loc113807896
s2f_0075531001	2.1822	2.0985	5.1382	5.9858e-05	0.0039089	1.9102	s2f_0075531001	wsc domain-containing protein 2-like
s2f_0144832001	3.3328	2.9221	5.1267	6.1406e-05	0.0039578	1.8857	s2f_0144832001	uncharacterized protein loc113805851
s2f_0056841001	3.4702	0.25011	5.1243	6.173e-05	0.0039578	1.8806	s2f_0056841001	peptidyl-prolyl cis-trans isomerase cyp19-1-like
s2f_0000273011	2.6082	1.0342	5.1119	6.3443e-05	0.0039981	1.8543	ACN	zinc metalloproteinase nas-13-like
s2f_0144552001	2.2236	2.1334	5.1066	6.4191e-05	0.0040182	1.843	s2f_0144552001	neurofilament medium polypeptide-like
s2f_0144885001	4.0859	-0.60355	5.0854	6.7283e-05	0.004187	1.7978	s2f_0144885001	uncharacterized protein loc113813470
s2f_0113006001	3.2284	3.8952	5.0789	6.8258e-05	0.0042228	1.784	s2f_0113006001	uncharacterized protein loc108669230
s2f_0063522001	1.5498	2.3757	5.0501	7.275e-05	0.0044487	1.7228	s2f_0063522001	chondroadherin-like
s2f_0018239001	2.9682	1.7456	5.0385	7.4656e-05	0.0045007	1.6979	CG34045	(genbank) uncharacterized protein
s2f_0382132001	1.5299	3.3077	5.0373	7.4846e-05	0.0045007	1.6955	s2f_0382132001	leucine-rich repeat extensin-like protein 5
s2f_0012755001	3.4452	1.2681	5.0372	7.4877e-05	0.0045007	1.6951	CG3246	(genbank) hypothetical protein
s2f_0112929001	3.6004	-0.21991	5.0247	7.6976e-05	0.0046007	1.6685	s2f_0112929001	uncharacterized protein loc108668618
s2f_0016433001	1.6642	5.6449	4.9999	8.1332e-05	0.0047791	1.6156	s2f_0016433001	(genbank) hypothetical protein
s2f_0007586001	1.7317	3.1195	4.9806	8.4901e-05	0.004908	1.5743	CG34316	(genbank) uncharacterized protein
s2f_0011682001	4.3602	0.28193	4.9743	8.6101e-05	0.0049356	1.5608	ANK4	phytochrome-interacting ankyrin-repeat protein 2-like
s2f_0001807005	2.9026	5.7988	4.971	8.6738e-05	0.0049356	1.5538	DMGDH	dimethylglycine dehydrogenase, mitochondrial
s2f_0001277006	2.4474	7.3144	4.9708	8.6778e-05	0.0049356	1.5533	BCMO-1	carotenoid isomerooxygenase-like
s2f_0000558004	3.5373	3.4532	4.9545	8.999e-05	0.0050638	1.5184	s2f_0000558004	(genbank) conserved hypothetical protein
s2f_0000002004	3.7677	1.9537	4.9456	9.1777e-05	0.0050833	1.4995	NKX2-8	homeobox protein nkx-2.8
s2f_0080130001	4.3195	2.5439	4.9342	9.4135e-05	0.0051867	1.4751	s2f_0080130001	uncharacterized protein loc113810864 isoform x1
s2f_0112839001	2.3767	-2.6861	4.9246	9.6178e-05	0.0052401	1.4545	s2f_0112839001	vegetative cell wall protein gp1-like
s2f_0002266002	1.678	5.0052	4.9227	9.6589e-05	0.0052401	1.4504	PRO	hypothetical protein
s2f_0000440002	3.9085	5.3856	4.8875	0.00010449	0.0054994	1.3748	s2f_0000440002	nose resistant to fluoxetine protein 6-like
s2f_0005451003	2.5938	3.1135	4.8843	0.00010523	0.0055084	1.368	TMEM272	transmembrane protein 272-like
s2f_0000397012	2.0327	1.6844	4.8783	0.00010665	0.0055084	1.3552	CASPASE-1	caspase-1-like
s2f_0080131001	4.4268	2.1183	4.8779	0.00010674	0.0055084	1.3543	s2f_0080131001	uncharacterized protein loc113810865
s2f_0173509001	4.2699	1.0643	4.8536	0.00011269	0.0057486	1.3022	s2f_0173509001	hypothetical protein
s2f_0007305002	2.5635	3.5539	4.8415	0.00011579	0.0057757	1.2761	UHPC	glucose-6-phosphate exchanger slc37a4-like
s2f_0000323004	1.8458	2.839	4.8396	0.00011629	0.0057757	1.272	MF-CPA	carboxypeptidase b-like
s2f_0004343001	1.832	4.1172	4.8354	0.00011738	0.0057757	1.263	DHCR-24	delta(24)-sterol reductase-like
s2f_0020008001	2.9468	1.8311	4.8233	0.0001206	0.0058756	1.237	s2f_0020008001	monocarboxylate transporter 12-like
s2f_0019547001	1.5406	4.4595	4.8021	0.00012646	0.0060534	1.1915	SYMBB.V1.2.002852.T1	hypothetical protein
s2f_0005041003	2.076	4.91	4.7869	0.00013085	0.0062076	1.1586	CBR-PMT-1	phosphoethanolamine n-methyltransferase-like
s2f_0000122018	2.1449	3.4718	4.7644	0.00013762	0.0064133	1.1102	ADGRG7	adhesion g-protein coupled receptor d1-like
s2f_0001159004	2.4519	3.1552	4.7485	0.00014262	0.0066176	1.0759	BMA-MBOA-2	diacylglycerol o-acyltransferase 1
s2f_0093773001	3.4932	1.5233	4.7415	0.00014488	0.0066928	1.0608	s2f_0093773001	uncharacterized protein loc108671742 isoform x1
s2f_0093806001	1.951	3.8235	4.7391	0.00014564	0.0066986	1.0558	s2f_0093806001	uncharacterized protein loc108671253
s2f_0001630008	5.3789	0.49234	4.7142	0.00015403	0.0069934	1.002	ABCH1	abc transporter g family member 23-like
s2f_0381650001	2.8115	1.6839	4.7069	0.00015657	0.0070783	0.98626	s2f_0381650001	calcium-binding protein p-like
s2f_0058341001	2.5915	3.031	4.6791	0.00016667	0.0074546	0.92617	s2f_0058341001	uncharacterized protein loc108669654
s2f_0001449001	2.9571	4.9567	4.6763	0.00016771	0.0074546	0.9202	ACOT2	acyl-coenzyme a thioesterase 1-like
s2f_0093752001	2.4537	2.7294	4.66	0.00017398	0.0076688	0.88496	s2f_0093752001	uncharacterized protein loc113823134
s2f_0090251001	1.6992	1.514	4.6382	0.00018275	0.0080219	0.83773	s2f_0090251001	uncharacterized protein loc108674932
s2f_0381709001	2.2177	-0.61617	4.6126	0.00019356	0.0083922	0.78251	s2f_0381709001	uncharacterized protein loc121864478
s2f_0000242023	3.2168	4.1418	4.6043	0.00019721	0.008481	0.76455	DSIM_GD18460	retinol-binding protein pinta-like
s2f_0045896001	3.9515	-1.1141	4.5922	0.0002027	0.0086816	0.73821	s2f_0045896001	protein snakeskin-like
s2f_0080111001	2.4597	2.4296	4.5861	0.00020548	0.0087654	0.7251	s2f_0080111001	translation initiation factor if-2-like
s2f_0011122001	1.8313	5.0942	4.5768	0.00020984	0.0089154	0.70494	s2f_0011122001	hypothetical protein
s2f_0015829001	1.6578	0.14879	4.5688	0.00021364	0.0090191	0.68771	s2f_0015829001	serine/arginine-rich splicing factor sc35-like
s2f_0015022001	2.9623	4.1413	4.5654	0.00021533	0.0090397	0.68015	Y39A3B.1	(genbank) hypothetical protein
s2f_0005097001	2.4933	1.6375	4.5627	0.00021661	0.0090572	0.67449	CG12817	multiple coagulation factor deficiency protein 2 homolog
s2f_0037691001	3.2539	3.2516	4.5523	0.00022175	0.0092357	0.65196	s2f_0037691001	uncharacterized protein loc108683316
s2f_0005101001	2.6774	3.5157	4.5396	0.00022824	0.0094688	0.62425	TMEM86B	lysoplasmalogenase
s2f_0016796001	3.1217	0.97055	4.5287	0.00023392	0.0095925	0.60064	BM18220	hypothetical protein
s2f_0003506004	2.8313	5.2738	4.5286	0.00023394	0.0095925	0.60056	FABP10A	fatty acid-binding protein, liver-like
s2f_0006608002	1.7137	3.5501	4.5136	0.00024201	0.009847	0.56801	BM9816	carboxypeptidase q-like
s2f_0000124009	2.4114	3.3652	4.4945	0.00025268	0.010242	0.52658	ATP11B	probable phospholipid-transporting atpase if isoform x1
s2f_0000108005	1.6455	5.8626	4.4812	0.00026044	0.010397	0.49757	DSIM_GD25217	udp-glucuronosyltransferase 2b13
s2f_0000244011	1.7941	4.7827	4.4785	0.00026198	0.010403	0.49192	s2f_0000244011	lipase 3-like
s2f_0002600004	1.9478	3.0744	4.4776	0.00026255	0.010403	0.48983	AGABI1DRAFT_80184	alpha-amylase-like
s2f_0380963001	3.4401	0.92767	4.4753	0.00026393	0.010416	0.48477	s2f_0380963001	uncharacterized protein loc121858094
s2f_0000044030	4.2488	1.4958	4.4695	0.00026737	0.010449	0.47234	DSIM_GD24713	tetraspanin-2a
s2f_0015318001	3.1224	5.5558	4.469	0.00026767	0.010449	0.47127	CG43896	peritrophin-48-like
s2f_0112992001	3.0759	-1.2603	4.4594	0.00027355	0.01054	0.45043	s2f_0112992001	mucin-2-like
s2f_0000027043	3.4524	4.5176	4.4587	0.00027398	0.01054	0.44891	CG9287	glutactin
s2f_0380354001	2.3021	-2.5829	4.4135	0.00030355	0.011469	0.35057	s2f_0380354001	uncharacterized protein loc121853117
s2f_0000487004	2.0242	4.5534	4.4068	0.00030814	0.011582	0.33616	s2f_0000487004	retinol dehydrogenase 7-like
s2f_0006941003	3.6697	2.4373	4.406	0.00030873	0.011582	0.33433	C05D2.8	putative phosphoenolpyruvate synthase
s2f_0144549001	-2.0991	-2.7946	-4.4006	0.00031252	0.011683	0.32262	s2f_0144549001	keratin, type i cytoskeletal 9-like
s2f_0005483002	2.7489	5.7203	4.3917	0.00031888	0.011868	0.3033	VMO1	vitelline membrane outer layer protein 1 homolog
s2f_0001271008	3.0068	-2.3827	4.3905	0.00031971	0.011868	0.3008	LARGE2	large xylosyl- and glucuronyltransferase 1
s2f_0382498001	3.5855	-0.71404	4.3717	0.00033365	0.012156	0.25987	s2f_0382498001	uncharacterized protein pb18e9.04c-like isoform x1
s2f_0080095001	3.0689	2.8871	4.3713	0.00033399	0.012156	0.2589	s2f_0080095001	mediator of dna damage checkpoint protein 1-like
s2f_0112873001	3.4436	-0.73997	4.3688	0.00033588	0.012156	0.25347	s2f_0112873001	leucine-rich repeat-containing protein 15-like
s2f_0380805001	2.4717	0.28937	4.3582	0.00034403	0.012345	0.23049	s2f_0380805001	uncharacterized protein loc121856716
s2f_0000811007	2.0916	2.399	4.3579	0.00034426	0.012345	0.22985	SI:CH73-12O23.1	lysosomal alpha-glucosidase-like
s2f_0052502001	3.2146	-2.3239	4.3512	0.00034952	0.012492	0.2153	s2f_0052502001	fibroin heavy chain-like
s2f_0001975005	3.6422	3.9212	4.3324	0.00036476	0.012992	0.17438	BM4358	protein mesh isoform x1
s2f_0382504001	2.0135	-2.5097	4.3301	0.00036664	0.013016	0.16943	s2f_0382504001	uncharacterized protein loc121870807
s2f_0001045001	2.0052	2.5264	4.3271	0.00036913	0.013041	0.16295	BNA3	hypothetical protein
s2f_0071097001	-2.5665	7.3156	-4.3245	0.00037135	0.013052	0.1572	s2f_0071097001	sialidase-like
s2f_0001149007	2.2952	1.8017	4.3142	0.00038016	0.013236	0.13472	ARSA	arylsulfatase a
s2f_0000108030	2.7842	6.22	4.3121	0.00038196	0.013236	0.1302	DSIM_GD12034	udp-glucuronosyltransferase
s2f_0001252007	1.9308	2.3946	4.3111	0.00038285	0.013236	0.12794	CG18558	glycoprotein-n-acetylgalactosamine 3-beta-galactosyltransferase 1-like
s2f_0058331001	2.7366	3.2282	4.2999	0.00039264	0.01353	0.10374	s2f_0058331001	uncharacterized protein loc113807147
s2f_0001026001	3.2859	3.9981	4.2953	0.00039682	0.01363	0.093602	BM13532	macrophage mannose receptor 1-like
s2f_0144841001	2.8962	0.27752	4.2804	0.00041047	0.014053	0.061184	s2f_0144841001	uncharacterized protein loc113810391
s2f_0000422020	2.04	-1.2654	4.2766	0.00041403	0.014129	0.052895	CG5644	(genbank) uncharacterized protein
s2f_0071083001	2.4827	4.6558	4.2723	0.00041802	0.014219	0.043703	s2f_0071083001	uncharacterized protein loc108677414
s2f_0000620008	1.9408	3.8394	4.2629	0.00042705	0.014375	0.023232	AN01G13550	hypothetical protein
s2f_0000018022	2.46	2.7413	4.2619	0.00042809	0.014375	0.020898	CALB	calmodulin-like
s2f_0013157001	3.1467	-2.4925	4.2612	0.0004287	0.014375	0.019518	s2f_0013157001	nose resistant to fluoxetine protein 6-like
s2f_0015003001	4.1708	1.5912	4.2605	0.00042939	0.014375	0.017983	CG33120	(genbank) uncharacterized protein
s2f_0113061001	2.1919	-1.1435	4.226	0.00046441	0.015305	-0.057144	s2f_0113061001	cell wall protein dan4-like isoform x1
s2f_0000180010	2.6511	7.2354	4.2198	0.00047102	0.015441	-0.070682	CHT4	probable chitinase 2
s2f_0048864001	3.6317	-1.3214	4.2194	0.00047144	0.015441	-0.071537	s2f_0048864001	sodium- and chloride-dependent gaba transporter 1-like
s2f_0000209001	2.4868	2.462	4.2025	0.00048985	0.015945	-0.10824	EIF2AK2	hypothetical protein
s2f_0112934001	2.2209	0.80687	4.1973	0.00049566	0.015987	-0.11953	s2f_0112934001	uncharacterized protein loc108670182
s2f_0000511006	1.6936	4.4458	4.1924	0.00050129	0.016084	-0.13035	BM2533	transcription factor gata-4-like
s2f_0001908003	4.0056	11.056	4.1739	0.00052273	0.016607	-0.17047	APOLTP	apolipophorins-like
s2f_0000039015	3.2904	-2.4024	4.1677	0.00053023	0.016794	-0.18411	RAB15	ras-related protein rab-15
s2f_0000234011	-2.0105	-1.4726	-4.1542	0.00054668	0.017264	-0.21337	ABU6	hypothetical protein
s2f_0036255001	2.2452	1.9496	4.1451	0.00055812	0.017468	-0.23318	s2f_0036255001	asialoglycoprotein receptor 1-like
s2f_0113109001	2.8237	-0.064651	4.1391	0.00056587	0.017607	-0.2464	s2f_0113109001	sodium-dependent noradrenaline transporter-like isoform x1
s2f_0003107003	3.1866	6.0143	4.1133	0.00060005	0.018453	-0.30252	s2f_0003107003	delta(7)-sterol 5(6)-desaturase erg32-like
s2f_0027099001	3.1198	3.4092	4.1049	0.00061158	0.018753	-0.32075	RFS2	hypothetical protein
s2f_0000380018	1.6774	3.1146	4.0943	0.0006265	0.019155	-0.3438	DSIM_GD11439	longitudinals lacking protein, isoforms h/m/v
s2f_0380783001	2.0896	1.03	4.0905	0.00063199	0.019268	-0.35216	s2f_0380783001	uncharacterized protein loc121856602
s2f_0023461001	2.8193	2.2231	4.0854	0.00063932	0.019379	-0.36319	s2f_0023461001	oplophorus-luciferin 2-monooxygenase non-catalytic subunit-like
s2f_0000448001	2.2906	1.4398	4.0838	0.0006417	0.019396	-0.36675	AGABI1DRAFT_110229	hypothetical protein
s2f_0200408001	3.372	0.99007	4.0681	0.00066502	0.019986	-0.40089	s2f_0200408001	uncharacterized protein loc121858534 isoform x1
s2f_0000335002	2.766	1.5321	4.0607	0.00067628	0.020096	-0.41695	ARA2	l-galactose dehydrogenase
s2f_0000604011	1.9309	4.5661	4.0575	0.0006812	0.02013	-0.42389	CG7227	protein croquemort-like
s2f_0000064019	2.8334	-0.22945	4.0472	0.00069746	0.020396	-0.44645	CG8028	monocarboxylate transporter 9
s2f_0383440001	1.6217	-1.2482	4.0452	0.00070058	0.020396	-0.45072	s2f_0383440001	pollen-specific leucine-rich repeat extensin-like protein 1
s2f_0381711001	3.7115	-1.0564	4.0338	0.00071904	0.020783	-0.47558	s2f_0381711001	uncharacterized protein loc121864502
s2f_0003108002	3.4571	5.1502	4.0306	0.00072423	0.020876	-0.48246	AGX1	serine--glyoxylate aminotransferase
s2f_0000187018	1.6279	-1.8658	4.0273	0.00072968	0.020976	-0.48963	ACD-3	sodium channel protein nach-like
s2f_0001195005	3.0689	1.5321	4.024	0.0007352	0.021009	-0.49684	DSIM_GD15477	zinc transporter zip1
s2f_0002442008	2.4449	0.19432	4.0231	0.00073678	0.021009	-0.49889	CDA6, TCCDA6	(genbank) hypothetical protein
s2f_0200392001	1.5878	3.367	4.0141	0.00075198	0.021328	-0.51842	s2f_0200392001	uncharacterized protein loc121857614
s2f_0004381002	1.7196	3.8044	4.0122	0.00075529	0.021364	-0.52261	PADG_06459	phytanoyl-coa dioxygenase
s2f_0001152004	-1.9844	12.261	-4.0006	0.00077534	0.021757	-0.54765	s2f_0001152004	crustacyanin-a2 subunit-like
s2f_0002539002	2.6114	4.8013	3.9984	0.00077939	0.021812	-0.55263	ML8, GLEAN_16352, NPC2F	npc intracellular cholesterol transporter 2-like
s2f_0144575001	3.1566	-1.4323	3.9967	0.00078224	0.021835	-0.55613	s2f_0144575001	uncharacterized protein loc113825457
s2f_0001193008	3.11	1.5292	3.992	0.00079074	0.021976	-0.56645	EZR	ezrin
s2f_0003722001	1.8159	4.3707	3.9823	0.00080841	0.022329	-0.58757	ADGF	adenosine deaminase 2
s2f_0039283001	2.651	-3.0541	3.9762	0.00081971	0.022524	-0.60084	s2f_0039283001	organic cation transporter protein-like
s2f_0016711001	2.5949	8.7591	3.9704	0.00083052	0.022703	-0.61336	s2f_0016711001	uncharacterized protein loc113806465
s2f_0112960001	4.1452	-1.8117	3.9674	0.00083619	0.022741	-0.61986	s2f_0112960001	a-agglutinin anchorage subunit-like
s2f_0200569001	3.617	-0.22474	3.9585	0.00085332	0.023147	-0.63924	s2f_0200569001	uncharacterized protein loc121870554
s2f_0000075029	2.6464	2.1225	3.9521	0.00086581	0.023419	-0.65312	CHRNA7	hypothetical protein
s2f_0112835001	2.3998	3.4769	3.9512	0.00086777	0.023419	-0.65527	s2f_0112835001	uncharacterized protein loc108669467
s2f_0001682002	1.7193	-2.4815	3.9463	0.00087745	0.02362	-0.66587	NUDT8	nucleoside diphosphate-linked moiety x motif 8
s2f_0000058011	2.7125	4.641	3.9402	0.00088964	0.023827	-0.67905	BMA-CYP-43A1	(genbank) cytochrome p450, putative
s2f_0144930001	3.1303	1.4869	3.9338	0.00090272	0.024082	-0.69298	s2f_0144930001	uncharacterized protein loc113800563
s2f_0000048036	2.2173	1.2189	3.9333	0.00090374	0.024082	-0.69407	CYP-3	thiol protease aleurain-like
s2f_0381401001	3.2601	-0.34359	3.9317	0.00090697	0.024108	-0.69747	s2f_0381401001	uncharacterized protein loc121861667
s2f_0063103001	3.6659	2.4058	3.9302	0.00091009	0.02413	-0.70075	s2f_0063103001	predicted protein
s2f_0005567003	4.2321	4.0043	3.9112	0.00095033	0.024947	-0.74206	SI:DKEY-4C23.3	vitellogenin-like
s2f_0014877001	2.502	4.1737	3.907	0.0009595	0.025063	-0.75123	s2f_0014877001	oplophorus-luciferin 2-monooxygenase non-catalytic subunit-like
s2f_0000027012	2.0434	-2.3353	3.9034	0.00096732	0.025143	-0.75898	DSIM_GD21942	cholinesterase isoform x1
s2f_0007637001	2.9514	4.544	3.8974	0.00098075	0.025365	-0.77214	DSIM_GD18854	glycine n-methyltransferase
s2f_0016217001	2.5421	1.1867	3.8963	0.00098306	0.025365	-0.77438	CG18635	(genbank) uncharacterized protein
s2f_0002890013	4.6946	10.384	3.8719	0.0010394	0.026496	-0.82758	s2f_0002890013	hemocyanin c chain-like
s2f_0005001002	3.5823	7.5462	3.8689	0.0010465	0.026613	-0.83409	s2f_0005001002	betaine--homocysteine s-methyltransferase 1-like
s2f_0200471001	2.4462	-1.1203	3.8561	0.0010774	0.027072	-0.86178	s2f_0200471001	techylectin-5a-like
s2f_0010064001	3.3775	4.6038	3.8452	0.0011044	0.027554	-0.8854	VG	vitellogenin-like
s2f_0000578009	2.3841	1.4316	3.8305	0.001142	0.028359	-0.91733	BM7726	17-beta-hydroxysteroid dehydrogenase 13-like
s2f_0000921008	2.086	1.6243	3.8189	0.0011725	0.02898	-0.94246	SLC49A3	solute carrier family 49 member a3
s2f_0380443001	2.1592	-2.7911	3.8108	0.0011942	0.029448	-0.95995	s2f_0380443001	transmembrane protease serine 13-like
s2f_0144650001	1.7679	-2.3797	3.8093	0.0011984	0.029482	-0.96329	s2f_0144650001	uncharacterized protein loc113808186
s2f_0381071001	-2.0245	-3.6077	-3.8063	0.0012067	0.029551	-0.96992	s2f_0381071001	mucin-7-like
s2f_0001152001	2.0581	5.5369	3.7945	0.0012395	0.030213	-0.99543	CHBP	apolipoprotein d-like
s2f_0000102006	2.0483	-0.92596	3.789	0.0012549	0.030449	-1.0072	112.T00020	hypothetical protein
s2f_0383462001	3.9329	1.0194	3.7757	0.0012935	0.03117	-1.0361	s2f_0383462001	uncharacterized protein loc121879222
s2f_0000293003	3.2661	2.3979	3.7694	0.0013122	0.031523	-1.0498	REG4	type-2 ice-structuring protein-like
s2f_0001985001	2.3674	4.9863	3.7606	0.0013388	0.031939	-1.0689	PRO2	delta-1-pyrroline-5-carboxylate synthase
s2f_0000582005	3.4701	0.25261	3.7418	0.0013971	0.033064	-1.1095	ITGB5	integrin beta-5
s2f_0001307006	2.7206	-2.736	3.7383	0.0014082	0.033254	-1.117	s2f_0001307006	mam and ldl-receptor class a domain-containing protein 1-like
s2f_0000484007	2.2613	2.7128	3.7355	0.0014174	0.033396	-1.1232	CERS4	ceramide synthase 2-like
s2f_0006242003	3.0757	-0.35933	3.7245	0.0014533	0.034091	-1.147	PLLP	plasmolipin-like
s2f_0052505001	3.7221	3.9416	3.7148	0.0014856	0.034771	-1.168	s2f_0052505001	phosphatidylinositol phosphatase ptprq-like
s2f_0112908001	1.5233	0.24733	3.7121	0.0014946	0.034905	-1.1737	s2f_0112908001	keratinocyte proline-rich protein-like
s2f_0144541001	1.5507	0.90066	3.6999	0.0015369	0.035641	-1.2003	s2f_0144541001	peptidyl-prolyl cis-trans isomerase 2-like
s2f_0113090001	3.1669	-0.33522	3.6991	0.0015396	0.035641	-1.2019	s2f_0113090001	mucin-6-like isoform x1
s2f_0002461004	2.9759	-0.24709	3.6945	0.0015558	0.035878	-1.2119	AM31	pantetheinase-like
s2f_0058342001	4.3153	1.6458	3.6869	0.001583	0.036279	-1.2284	s2f_0058342001	mucin-17-like
s2f_0382156001	1.7474	-3.1655	3.6812	0.0016036	0.03664	-1.2406	s2f_0382156001	uncharacterized protein loc121867729
s2f_0144852001	2.5137	0.57376	3.6779	0.0016155	0.036753	-1.2477	s2f_0144852001	uncharacterized protein loc113800818 isoform x1
s2f_0093713001	2.5596	-0.19424	3.6604	0.0016812	0.03746	-1.2856	s2f_0093713001	copper-specific metallothionein-2-like
s2f_0381511001	1.8141	-3.3054	3.6516	0.001715	0.037957	-1.3045	s2f_0381511001	proline-rich extensin-like protein epr1
s2f_0382783001	3.6924	-0.9133	3.6275	0.0018116	0.03976	-1.3566	s2f_0382783001	histidine-rich glycoprotein-like isoform x1
s2f_0000059015	2.7885	2.0277	3.6097	0.0018862	0.041057	-1.3949	SI:CH73-86N18.1	c-type lectin domain family 4 member e-like
s2f_0093766001	2.0824	-2.6288	3.6084	0.0018917	0.041094	-1.3977	s2f_0093766001	uncharacterized protein loc108678964
s2f_0113047001	2.4746	2.5453	3.6019	0.0019198	0.04153	-1.4117	s2f_0113047001	uncharacterized protein loc108677413
s2f_0069991001	1.9881	-3.4173	3.6011	0.0019232	0.04153	-1.4134	s2f_0069991001	uncharacterized loc103314922
s2f_0039282001	1.6838	6.3665	3.601	0.0019236	0.04153	-1.4136	s2f_0039282001	anti-lipopolysaccharide factor-like
s2f_0381145001	-1.8382	2.4349	-3.5838	0.0020001	0.042831	-1.4506	s2f_0381145001	uncharacterized protein loc121859558 isoform x1
s2f_0093819001	2.6443	-1.7767	3.5803	0.002016	0.042981	-1.4581	s2f_0093819001	mucin-5ac-like
s2f_0093793001	2.7747	-0.64059	3.569	0.0020684	0.043698	-1.4825	s2f_0093793001	endochitinase a-like isoform x1
s2f_0144502001	2.7744	-2.7077	3.5688	0.0020695	0.043698	-1.4829	s2f_0144502001	uncharacterized protein loc108666463 isoform x1
s2f_0144520001	2.0152	1.3743	3.5576	0.0021225	0.04473	-1.507	s2f_0144520001	uncharacterized protein loc113808347
s2f_0001307003	2.895	2.907	3.5545	0.0021376	0.04478	-1.5137	SI:CH211-106H4.4	mam and ldl-receptor class a domain-containing protein 1-like
s2f_0381080001	1.5202	-3.4817	3.5323	0.0022478	0.046718	-1.5614	s2f_0381080001	kruppel-like factor 18
s2f_0058321001	1.5758	1.139	3.5047	0.0023923	0.048669	-1.6204	s2f_0058321001	uncharacterized protein loc108675968
s2f_0144568001	2.102	-0.34619	3.5011	0.0024123	0.048982	-1.6283	s2f_0144568001	uncharacterized protein loc113803961
s2f_0005007002	-1.4532	7.5681	-9.4315	1.4394e-08	3.8069e-05	9.7616	AGABI1DRAFT_54553	hypothetical protein
s2f_0004494001	1.389	10.036	8.7275	4.7908e-08	8.4471e-05	8.6603	BMA-PCK-1	phosphoenolpyruvate carboxykinase [gtp]-like
s2f_0013476001	1.2173	8.3938	8.3122	1.0025e-07	0.00010187	7.9769	CG13868	(genbank) uncharacterized protein
s2f_0000287002	1.3292	4.0567	7.7821	2.6575e-07	0.00023428	7.0675	CBR-TBX-37	t-box transcription factor tbx6
s2f_0000010050	1.178	5.5749	7.6997	3.1029e-07	0.00025126	6.9222	ST4	facilitated trehalose transporter tret1-like
s2f_0093714001	1.2919	5.0834	7.6631	3.3251e-07	0.00025126	6.8573	s2f_0093714001	microtubule-associated protein futsch-like isoform x1
s2f_0002049003	1.4723	7.5511	7.6205	3.6043e-07	0.0002542	6.7816	SCPX	non-specific lipid-transfer protein
s2f_0001149001	1.3614	4.0746	7.5358	4.234e-07	0.00027995	6.6303	s2f_0001149001	n-acetylgalactosamine-6-sulfatase-like
s2f_0002569001	1.2576	5.9352	7.4533	4.9579e-07	0.00029139	6.4818	DSIM_GD17058	regucalcin-like
s2f_0000715002	1.4638	8.0915	7.2766	6.9723e-07	0.00033527	6.1604	s2f_0000715002	contactin-associated protein-like 5 isoform x1
s2f_0003810002	1.3863	7.3477	7.2368	7.5331e-07	0.00034649	6.0873	AN06G00370	failed axon connections homolog
s2f_0000064033	1.2788	6.2142	7.1441	9.0291e-07	0.00038364	5.9162	BM5077	monocarboxylate transporter 12-like
s2f_0072226001	1.2568	6.8171	7.1098	9.6584e-07	0.00039299	5.8525	s2f_0072226001	metallothionein-1-like
s2f_0002099004	1.2919	6.4345	7.0721	1.0402e-06	0.000393	5.7823	SYMBB.V1.2.022971.T1	putative methyltransferase ddb_g0268948
s2f_0001085004	0.94803	9.5701	6.9273	1.3854e-06	0.00048855	5.5108	SAH1	adenosylhomocysteinase
s2f_0000354001	-1.3283	6.1352	-6.8956	1.4758e-06	0.00049622	5.4509	BM3778	fatty acid synthase-like
s2f_0000109013	1.0964	6.7527	6.849	1.6195e-06	0.00051917	5.3627	ALDH2	aldehyde dehydrogenase, mitochondrial
s2f_0001349008	1.15	6.8476	6.7884	1.8287e-06	0.000569	5.2474	BM10129	serine/threonine-protein kinase pim-3-like
s2f_0002493001	1.2262	4.3331	6.6512	2.4119e-06	0.00063847	4.9843	SI:CH211-210C8.6	hypothetical protein
s2f_0000059030	1.3217	7.6603	6.5888	2.7378e-06	0.00065826	4.8637	SI:DKEY-26C10.5	perlucin-like protein
s2f_0000755012	1.3896	3.8277	6.551	2.9572e-06	0.00067231	4.7904	BM6543	proton-coupled folate transporter-like
s2f_0004106002	0.92012	5.3822	6.5484	2.9729e-06	0.00067231	4.7853	ETHE1	persulfide dioxygenase ethe1, mitochondrial
s2f_0000436007	0.94451	7.6477	6.5461	2.9869e-06	0.00067231	4.7808	CYP334B1	probable cytochrome p450 49a1
s2f_0006463001	1.0314	6.714	6.4197	3.8698e-06	0.00080003	4.5341	DSIM_GD21667	microsomal triglyceride transfer protein large subunit
s2f_0071086001	1.1743	5.1278	6.3898	4.1156e-06	0.00080003	4.4754	s2f_0071086001	actin cytoskeleton-regulatory complex protein pan1-like isoform x1
s2f_0006333001	1.0152	5.2663	6.3847	4.1593e-06	0.00080003	4.4653	SINHCAFL	sin3-hdac complex-associated factor-like
s2f_0000328018	1.2653	4.415	6.3629	4.3505e-06	0.00082186	4.4224	AGABI1DRAFT_68768	hypothetical protein
s2f_0002313003	1.1053	8.2113	6.3496	4.4715e-06	0.00082989	4.3963	ADO1	adenosine kinase
s2f_0007730002	1.4737	5.731	6.1374	6.9535e-06	0.0011494	3.9746	IYD	iodotyrosine deiodinase 1
s2f_0003728003	1.0501	4.5645	6.1258	7.1236e-06	0.0011594	3.9515	s2f_0003728003	l-proline trans-4-hydroxylase-like
s2f_0004397002	1.1612	3.8372	5.9951	9.3793e-06	0.0013975	3.6884	ALG3	dol-p-man:man(5)glcnac(2)-pp-dol alpha-1,3-mannosyltransferase
s2f_0000713005	1.052	4.256	5.9882	9.5172e-06	0.0013984	3.6744	MFSD9	major facilitator superfamily domain-containing protein 9
s2f_0000101019	1.3283	6.7259	5.8997	1.1479e-05	0.0015771	3.495	BM2042	1,5-anhydro-d-fructose reductase-like
s2f_0035277001	-1.4744	1.7883	-5.8811	1.1943e-05	0.0016197	3.4571	CPR155	agap013367-pa
s2f_0002239005	1.0999	5.8431	5.8451	1.2893e-05	0.0016281	3.3837	DSIM_GD17114	inositol-trisphosphate 3-kinase a-like
s2f_0000113019	1.3952	4.6231	5.8223	1.3536e-05	0.0016281	3.3371	SAP1	hypothetical protein
s2f_0005074002	1.1732	2.3592	5.822	1.3544e-05	0.0016281	3.3365	AN01G09740	lambda-crystallin homolog
s2f_0001138006	0.87769	6.6085	5.846	1.287e-05	0.0016281	3.3854	DSIM_GD13563	udp-glucose 4-epimerase-like
s2f_0005844001	0.89341	5.8325	5.7834	1.471e-05	0.0017291	3.2574	SSR1	translocon-associated protein subunit alpha
s2f_0001675005	1.3092	4.4661	5.7617	1.5409e-05	0.001789	3.2129	AHHA	hypothetical protein
s2f_0000545008	0.72754	5.4996	5.7379	1.6213e-05	0.0018055	3.1641	BM10686	carbonyl reductase [nadph] 1-like
s2f_0001948004	1.2004	4.9407	5.7218	1.6784e-05	0.0018397	3.1309	DSIM_GD10688	mitochondrial amidoxime reducing component 2-like
s2f_0000084034	0.90539	3.0882	5.6522	1.9493e-05	0.0020101	2.9874	BHLHA15	class a basic helix-loop-helix protein 15
s2f_0000048023	1.2116	4.8415	5.6034	2.1657e-05	0.0021075	2.8864	CTSC	dipeptidyl peptidase 1-like
s2f_0003004001	1.0848	4.9675	5.5896	2.2311e-05	0.0021075	2.8579	TKFC	triokinase/fmn cyclase
s2f_0002068006	0.94467	6.3522	5.6058	2.1545e-05	0.0021075	2.8914	CBR-GBH-1	gamma-butyrobetaine dioxygenase-like
s2f_0000227006	1.2459	5.2539	5.5097	2.6529e-05	0.0022066	2.6917	UBC4	hypothetical protein
s2f_0000881002	1.016	5.9733	5.5068	2.6698e-05	0.0022066	2.6857	BMA-HEX-1	beta-hexosaminidase subunit beta-like
s2f_0000077025	1.2007	7.1442	5.4598	2.9567e-05	0.0024061	2.5877	CTSA	lysosomal protective protein
s2f_0200322001	1.4317	5.6343	5.4078	3.3117e-05	0.002576	2.4788	s2f_0200322001	uncharacterized protein loc121853568
s2f_0000395019	1.307	6.0514	5.3924	3.4243e-05	0.0026442	2.4467	CEL9A	endoglucanase e-4-like
s2f_0000043014	0.72417	9.415	5.3598	3.6773e-05	0.002819	2.3783	A1	actin, muscle
s2f_0001620001	-1.0359	4.3014	-5.3458	3.7921e-05	0.0028517	2.3487	HSPBP1	hsp70-binding protein 1
s2f_0000130010	0.89407	7.2398	5.3447	3.8009e-05	0.0028517	2.3465	CATHD	lysosomal aspartic protease-like
s2f_0007353001	1.2443	2.2529	5.3168	4.0403e-05	0.002989	2.2878	BMA-DAF-36	cholesterol 7-desaturase-like
s2f_0001028003	-0.89714	4.7368	-5.2081	5.1304e-05	0.0035707	2.0584	EXDL2A	exonuclease 3'-5' domain-containing protein 2
s2f_0001790002	1.0162	4.2219	5.1919	5.3177e-05	0.0036769	2.0239	ANKS4B	ankyrin repeat and sam domain-containing protein 4b
s2f_0000516004	1.2929	7.2568	5.1844	5.4053e-05	0.0037132	2.0082	DSIM_GD17157	ferritin subunit
s2f_0002997004	1.1268	3.7502	5.1738	5.5339e-05	0.0037224	1.9856	BM2650	androgen-dependent tfpi-regulating protein-like
s2f_0003138002	0.78913	4.6979	5.1767	5.4983e-05	0.0037224	1.9918	ZGC:85858	stress-associated endoplasmic reticulum protein 2
s2f_0039178001	0.88081	6.7383	5.1717	5.5595e-05	0.0037224	1.9812	s2f_0039178001	transmembrane protein 254-like
s2f_0001856004	1.0415	4.3585	5.1454	5.8919e-05	0.0038715	1.9254	CTR2	high affinity copper uptake protein 1-like
s2f_0002055001	1.1195	6.2183	5.1348	6.0319e-05	0.0039148	1.9028	PTGS1	prostaglandin g/h synthase 1
s2f_0001894006	1.4972	3.3582	5.1116	6.3492e-05	0.0039981	1.8536	AST-1	dna-binding protein d-ets-6-like
s2f_0001252006	0.95459	2.3336	5.1131	6.3278e-05	0.0039981	1.8568	C1GALT1	hypothetical protein
s2f_0000049035	0.95056	6.5497	5.0565	7.1738e-05	0.0044123	1.7362	s2f_0000049035	organic cation transporter protein-like
s2f_0022538001	1.2362	6.6954	5.0168	7.8333e-05	0.0046555	1.6517	s2f_0022538001	creatinase-like
s2f_0002288002	1.0469	4.5811	5.0057	8.0295e-05	0.0047455	1.6279	ENDOU	poly(u)-specific endoribonuclease homolog
s2f_0004888003	0.90034	3.4888	4.9975	8.1768e-05	0.0047791	1.6105	BM1113	protein ubash3a homolog isoform x1
s2f_0093690001	0.90033	5.5593	4.9892	8.3299e-05	0.0048419	1.5926	s2f_0093690001	protein split ends-like
s2f_0003292001	0.73429	7.226	4.9602	8.8836e-05	0.0050257	1.5308	ATP6V1H	v-type proton atpase subunit h isoform x1
s2f_0000352013	1.0669	4.1937	4.9476	9.1379e-05	0.0050833	1.5037	BMA-NHL-2	tripartite motif-containing protein 2-like
s2f_0014093001	0.7997	7.4361	4.9471	9.1483e-05	0.0050833	1.5026	DSIM_GD21514	soma ferritin
s2f_0003791002	0.90892	6.5448	4.9227	9.6587e-05	0.0052401	1.4504	BMA-PGHM-1	peptidylglycine alpha-hydroxylating monooxygenase
s2f_0112846001	1.2663	4.1191	4.9199	9.7186e-05	0.0052455	1.4445	s2f_0112846001	a-agglutinin anchorage subunit-like
s2f_0001070005	1.2041	10.996	4.9168	9.7873e-05	0.0052558	1.4377	s2f_0001070005	glutamine synthetase-like
s2f_0001767008	1.265	4.3054	4.9047	0.00010056	0.0053498	1.4117	BM3166	hypothetical protein
s2f_0000402013	1.2575	2.5044	4.9043	0.00010063	0.0053498	1.411	ZBED9	scan domain-containing protein 3
s2f_0035549001	0.8707	5.9883	4.9012	0.00010134	0.0053602	1.4043	s2f_0035549001	hypothetical protein
s2f_0004576001	0.89179	2.8888	4.8795	0.00010636	0.0055084	1.3578	BMA-GLY-20	alpha-1,6-mannosyl-glycoprotein 2-beta-n-acetylglucosaminyltransferase-like
s2f_0005847002	1.2531	5.3485	4.8514	0.00011327	0.0057486	1.2973	AGMO-1	alkylglycerol monooxygenase-like
s2f_0001351001	0.63222	6.7026	4.8498	0.00011366	0.0057486	1.294	IDH1	isocitrate dehydrogenase [nadp] cytoplasmic
s2f_0001142001	0.81056	6.8675	4.8486	0.00011397	0.0057486	1.2914	s2f_0001142001	dehydrogenase/reductase sdr family member 11-like
s2f_0002453002	0.70593	8.1378	4.847	0.00011438	0.0057486	1.2879	BMA-VHA-13	v-type proton atpase catalytic subunit a
s2f_0000260006	0.76912	7.4525	4.8459	0.00011466	0.0057486	1.2856	AE_1	hypothetical protein
s2f_0018235001	1.1488	4.5148	4.8355	0.00011737	0.0057757	1.2632	SYMBB.V1.2.011692.T1	hypothetical protein
s2f_0001237002	1.4265	6.7196	4.8289	0.00011911	0.0058335	1.249	MBRE_PATCHED1	patched domain-containing protein 3-like
s2f_0001697003	1.1435	5.6058	4.8215	0.00012108	0.0058756	1.2332	CG12338	d-aspartate oxidase
s2f_0001077006	0.85401	5.0305	4.8186	0.00012186	0.0058868	1.227	RNF183	hypothetical protein
s2f_0000461008	1.0471	6.9638	4.8115	0.00012382	0.0059542	1.2117	REL	nuclear factor nf-kappa-b p100 subunit isoform x1
s2f_0001796006	1.4926	3.9744	4.7955	0.00012835	0.0061164	1.1772	BM6095	epoxide hydrolase 1-like
s2f_0000503005	0.8142	3.8378	4.7807	0.00013267	0.0062658	1.1454	23.M05942	hypothetical protein
s2f_0113022001	0.92796	3.4659	4.7731	0.00013495	0.0063451	1.129	s2f_0113022001	uncharacterized protein loc113829984
s2f_0000448007	0.7271	5.6712	4.765	0.00013742	0.0064133	1.1115	EPH1	epoxide hydrolase 4-like
s2f_0000107006	0.80717	5.7633	4.7298	0.00014872	0.0068109	1.0356	CFP	semaphorin-5a
s2f_0000165027	0.74405	4.7344	4.7209	0.00015174	0.006919	1.0164	DSIM_GD22428	vascular endothelial growth factor receptor 1 isoform x1
s2f_0011640001	0.72603	7.573	4.6854	0.00016431	0.0073969	0.93985	CG31886	(genbank) hypothetical protein
s2f_0002035001	0.86831	7.3693	4.6775	0.00016727	0.0074546	0.92272	ATP6V1B1	v-type proton atpase subunit b
s2f_0003240002	0.62301	7.0272	4.6603	0.00017388	0.0076688	0.8855	Y32F6A.5	retinoid-inducible serine carboxypeptidase-like
s2f_0020772001	1.4955	4.1948	4.6252	0.00018814	0.0082025	0.8098	s2f_0020772001	hypothetical protein
s2f_0001844001	1.1093	4.4691	4.6246	0.00018841	0.0082025	0.8084	DPSE_KAY	transcription factor kayak isoform x1
s2f_0000445001	0.8446	6.5737	4.6064	0.00019631	0.0084767	0.76895	PTGR1	prostaglandin reductase 1-like
s2f_0000516005	0.85728	9.5571	4.5681	0.00021399	0.0090191	0.68615	CBR-FTN-1	soma ferritin-like
s2f_0382733001	0.84316	3.571	4.5363	0.00022994	0.0095021	0.61712	s2f_0382733001	basic salivary proline-rich protein 2-like
s2f_0001149003	0.66188	6.5717	4.5223	0.0002373	0.0096925	0.5869	STS	steryl-sulfatase
s2f_0000397013	1.0644	5.2775	4.4846	0.00025842	0.010397	0.50503	DREDD	caspase-2-like
s2f_0003728001	1.1115	5.3487	4.4828	0.00025946	0.010397	0.50119	PHYH	phytanoyl-coa dioxygenase, peroxisomal
s2f_0002568004	1.4238	1.2189	4.4816	0.00026016	0.010397	0.49858	CG4025	dna damage-regulated autophagy modulator protein 2-like
s2f_0002201003	0.73283	6.208	4.4737	0.00026486	0.010416	0.48141	ATP6V1C2	v-type proton atpase subunit c 2 isoform x1
s2f_0003556004	0.99576	6.4365	4.4666	0.00026913	0.010467	0.46606	CG7966	methanethiol oxidase
s2f_0000990003	1.0463	5.9046	4.4647	0.00027034	0.010476	0.46176	RFX	hypothetical protein
s2f_0001517001	0.95678	4.0507	4.45	0.00027946	0.010683	0.4299	DSIM_GD19166	pyrroline-5-carboxylate reductase
s2f_0008861001	0.84773	3.9908	4.4496	0.00027972	0.010683	0.42901	TMEM246	transmembrane protein 246
s2f_0112975001	1.4763	5.5929	4.4343	0.00028956	0.011019	0.39585	s2f_0112975001	histone-lysine n-methyltransferase, h3 lysine-79 specific-like
s2f_0001929001	0.62414	6.7737	4.4196	0.00029933	0.01135	0.364	BMA-VHA-8	v-type proton atpase subunit e
s2f_0000002105	1.3925	1.5015	4.3885	0.00032118	0.01188	0.29642	MEOX1	homeobox protein mox-2
s2f_0004349003	1.0295	6.7829	4.3824	0.00032564	0.011989	0.28316	IER5L	immediate early response gene 5-like protein
s2f_0144760001	1.2383	2.1112	4.3814	0.00032639	0.011989	0.28097	s2f_0144760001	protein enabled homolog
s2f_0152953001	1.4467	-0.68862	4.3677	0.00033667	0.012156	0.25122	s2f_0152953001	uncharacterized protein loc113815823
s2f_0000621008	0.8102	5.8184	4.3695	0.00033536	0.012156	0.25496	ACOX57D-D	probable peroxisomal acyl-coenzyme a oxidase 1
s2f_0000707003	1.2792	6.3986	4.3263	0.00036981	0.013041	0.16119	DSIM_GD18723	sorbitol dehydrogenase-like
s2f_0001211002	0.5826	6.5856	4.3206	0.00037463	0.013123	0.14877	SEC23A	protein transport protein sec23a
s2f_0000999004	1.4013	4.8722	4.3123	0.00038178	0.013236	0.13064	SMPDL3B	acid sphingomyelinase-like phosphodiesterase 3b
s2f_0002598002	0.60181	7.5632	4.2689	0.00042129	0.014285	0.036232	BMA-PRDX-6	peroxiredoxin-6
s2f_0144671001	0.76261	3.5992	4.2566	0.00043318	0.014456	0.0095588	s2f_0144671001	uncharacterized protein loc113823526
s2f_0006223001	0.74581	4.9855	4.2473	0.00044251	0.014721	-0.010864	MOSPD3	motile sperm domain-containing protein 1-like
s2f_0002689008	0.95048	11.061	4.2354	0.00045459	0.015075	-0.03666	H82	phenoloxidase-activating factor 2-like
s2f_0000422040	0.87464	4.8528	4.2332	0.00045691	0.015105	-0.04155	s2f_0000422040	uncharacterized protein loc113808246
s2f_0003006004	0.81996	7.2757	4.2058	0.00048621	0.015875	-0.10109	CG10184	probable low-specificity l-threonine aldolase 2
s2f_0381710001	1.3341	0.36469	4.1985	0.00049435	0.015987	-0.117	s2f_0381710001	uncharacterized protein loc121864486
s2f_0003875002	0.80628	1.1937	4.1996	0.00049307	0.015987	-0.11451	CG12194	major facilitator superfamily domain-containing protein 1-like
s2f_0000953001	0.85462	6.2545	4.192	0.00050172	0.016084	-0.13116	BTG	protein tob1-like
s2f_0000182010	0.90773	6.8329	4.1824	0.00051281	0.01639	-0.15211	ANXB11	annexin b9-like isoform x1
s2f_0144686001	-1.1162	2.0592	-4.1805	0.000515	0.01641	-0.1562	s2f_0144686001	uncharacterized protein loc113822647
s2f_0002713004	0.71346	4.4593	4.1501	0.0005519	0.017377	-0.22246	CDASE	neutral ceramidase
s2f_0009484001	0.76516	7.2515	4.1484	0.00055398	0.01739	-0.22606	TYMP	thymidine phosphorylase-like
s2f_0036254001	0.9602	2.3279	4.1405	0.00056406	0.017602	-0.24332	s2f_0036254001	carbohydrate sulfotransferase 11-like
s2f_0000900010	0.67595	6.7243	4.1337	0.00057277	0.017769	-0.25799	IAP2	hypothetical protein
s2f_0001511004	1.4746	3.6602	4.1323	0.00057461	0.017774	-0.26105	s2f_0001511004	transmembrane channel-like protein 7
s2f_0000811001	0.99417	4.7158	4.1161	0.00059618	0.018388	-0.29634	SI	sucrase-isomaltase, intestinal
s2f_0001099003	0.89784	4.3634	4.0881	0.00063544	0.019317	-0.35737	CG18549	unc93-like protein mfsd11
s2f_0000629008	1.3758	5.5642	4.0819	0.00064438	0.019421	-0.37074	SYMBB.V1.2.032465.T1	xanthine dehydrogenase-like
s2f_0001153005	1.4198	1.9996	4.0634	0.00067221	0.020032	-0.41118	s2f_0001153005	transmembrane protein 45b-like
s2f_0000717005	0.56818	5.6912	4.0643	0.0006708	0.020032	-0.40918	ACSS1	acetyl-coenzyme a synthetase 2-like, mitochondrial
s2f_0002846002	0.57564	6.1158	4.0638	0.00067156	0.020032	-0.41025	ATP6V1D	v-type proton atpase subunit d
s2f_0014349001	-0.65069	2.8181	-4.0587	0.00067931	0.02013	-0.42123	s2f_0014349001	(genbank) hypothetical protein
s2f_0000369005	1.0713	2.9502	4.0478	0.00069647	0.020396	-0.44509	PPH21	serine/threonine-protein phosphatase pp2a catalytic subunit
s2f_0144589001	0.94054	3.0361	4.0467	0.00069811	0.020396	-0.44734	s2f_0144589001	uncharacterized protein loc113802954
s2f_0000398007	-0.92062	10.329	-4.0458	0.00069964	0.020396	-0.44943	HSP90AB1	heat shock protein hsp 90-beta
s2f_0000128015	0.62771	6.3106	4.0444	0.00070179	0.020396	-0.45236	CG3036	sialin
s2f_0000701005	0.8206	5.8049	4.0372	0.00071336	0.020676	-0.46801	BM7048	ileal sodium/bile acid cotransporter-like
s2f_0000358011	0.63417	3.9283	4.026	0.00073188	0.020983	-0.49252	GDA1	hypothetical protein
s2f_0002616003	0.64857	4.3017	4.0171	0.00074684	0.021239	-0.51186	PPT1	palmitoyl-protein thioesterase 1
s2f_0144648001	1.3609	0.29257	4.0083	0.00076192	0.021472	-0.53097	s2f_0144648001	uncharacterized protein loc113804747 isoform x1
s2f_0005174002	-0.76325	3.7937	-4.0076	0.00076316	0.021472	-0.53252	NALCN	sodium leak channel non-selective protein isoform x1
s2f_0382724001	-0.54845	3.7636	-3.9916	0.00079146	0.021976	-0.56732	s2f_0382724001	serine-rich adhesin for platelets-like
s2f_0000792002	1.2233	2.2565	3.9832	0.0008067	0.022329	-0.58555	ABCD2	hypothetical protein
s2f_0001668004	0.97653	2.4093	3.9807	0.00081137	0.022353	-0.59107	GAL1	galactokinase
s2f_0112781001	1.1502	5.9676	3.971	0.00082944	0.022703	-0.61212	s2f_0112781001	uncharacterized protein loc108681892
s2f_0003469004	0.71029	6.5622	3.9684	0.00083431	0.022741	-0.61771	BM3411	major facilitator superfamily domain-containing protein 12-like
s2f_0112883001	0.81186	5.2396	3.9412	0.00088767	0.023827	-0.67693	s2f_0112883001	uncharacterized protein loc113811327
s2f_0000498002	-0.57788	6.1819	-3.9283	0.00091404	0.024174	-0.70489	17.M07117	hypothetical protein
s2f_0000765007	0.6555	5.0451	3.9271	0.00091651	0.024179	-0.70746	s2f_0000765007	carbohydrate sulfotransferase 1-like
s2f_0001013001	1.3637	10.033	3.9192	0.00093322	0.024559	-0.72472	BM13857	s-adenosylmethionine synthase isoform x1
s2f_0000081005	0.88748	4.4912	3.9072	0.00095912	0.025063	-0.75085	BM3308	venom allergen 5-like
s2f_0000422044	1.3371	3.2112	3.904	0.00096611	0.025143	-0.75779	C04F6.7	hypothetical protein
s2f_0025780001	0.81397	6.1251	3.9013	0.00097207	0.025205	-0.76366	s2f_0025780001	hypothetical protein
s2f_0000310005	-0.6823	4.2561	-3.8939	0.00098862	0.025447	-0.77977	ICAM5	lachesin-like
s2f_0001714001	1.4312	3.3475	3.8883	0.0010012	0.025646	-0.79183	FUCA2	alpha-l-fucosidase-like
s2f_0000001120	0.96374	7.0052	3.8886	0.0010005	0.025646	-0.79114	CG1773	serine protease easter-like
s2f_0001021004	0.75867	4.7798	3.8796	0.0010213	0.026098	-0.81081	BBC	cholinephosphotransferase 1 isoform x1
s2f_0000886003	0.67437	3.4178	3.8638	0.0010586	0.02684	-0.845	CG13280	trans-1,2-dihydrobenzene-1,2-diol dehydrogenase-like
s2f_0002504004	0.88018	5.551	3.863	0.0010605	0.02684	-0.84676	CREB	cyclic amp-responsive element-binding protein 1 isoform x1
s2f_0015170001	1.1582	1.0848	3.8605	0.0010666	0.026929	-0.8522	AN13G00940	hypothetical protein
s2f_0000216008	0.8628	4.5262	3.8574	0.0010743	0.027059	-0.85906	CI-TLR2	protein toll-like
s2f_0006751001	0.59611	6.9208	3.8487	0.0010957	0.027469	-0.87792	ATP6AP2	renin receptor
s2f_0000325008	0.71946	6.5979	3.8459	0.0011026	0.027554	-0.88385	AGABI1DRAFT_86323	cytochrome b5 domain-containing protein rlf
s2f_0000073030	0.8356	3.8413	3.8319	0.0011383	0.028334	-0.91426	ADAMTS-1	a disintegrin and metalloproteinase with thrombospondin motifs 6-like
s2f_0000231021	0.55819	4.6336	3.824	0.0011589	0.028711	-0.93135	BM699	hypothetical protein
s2f_0001923001	0.90539	2.4825	3.8069	0.0012051	0.029551	-0.96862	CIB4	calcium and integrin-binding protein 1-like
s2f_0381787001	1.2561	-3.6097	3.796	0.0012352	0.030178	-0.99215	s2f_0381787001	basic salivary proline-rich protein 3-like
s2f_0004507001	1.082	3.2553	3.7913	0.0012484	0.03036	-1.0023	TANGO9	hypothetical protein
s2f_0013969001	0.88839	2.5839	3.7802	0.0012804	0.030997	-1.0264	BMA-KLU-1	early growth response protein 1
s2f_0000251005	0.59547	5.5854	3.7772	0.001289	0.031134	-1.0328	BMA-GRP-1	cytohesin-1 isoform x1
s2f_0017568001	-0.56531	5.3366	-3.7688	0.0013141	0.031523	-1.0511	SYMBB.V1.2.030075.T1	hypothetical protein
s2f_0000056010	-1.4177	8.0778	-3.7597	0.0013415	0.031939	-1.0708	AN12G06890	heat shock 70 kda protein-like
s2f_0001807004	1.4932	4.4576	3.7592	0.0013431	0.031939	-1.0719	SARDH	sarcosine dehydrogenase, mitochondrial
s2f_0000509006	0.66687	5.004	3.759	0.0013435	0.031939	-1.0722	CDC20	cell division cycle protein 20 homolog
s2f_0006396001	1.1298	1.4478	3.7466	0.0013819	0.032778	-1.0991	CG10958	dynein regulatory complex protein 1
s2f_0004943003	1.0139	8.5852	3.733	0.0014254	0.033509	-1.1285	BMA-MNK-1	map kinase-interacting serine/threonine-protein kinase 1-like
s2f_0001596002	0.86589	5.8193	3.707	0.001512	0.035233	-1.1847	ARU	epidermal growth factor receptor kinase substrate 8-like
s2f_0000015014	-0.80075	3.8103	-3.702	0.0015294	0.03556	-1.1956	IPP	actin-binding protein ipp
s2f_0002779002	0.62528	4.9376	3.6939	0.001558	0.035878	-1.2132	2.T00068	hypothetical protein
s2f_0003746003	0.55031	5.6065	3.6933	0.0015601	0.035878	-1.2145	DSIM_GD12947	protein smaug homolog 1
s2f_0007249001	-0.76151	3.9493	-3.6865	0.0015843	0.036279	-1.2292	DSIM_GD21732	probable rna polymerase ii nuclear localization protein slc7a6os
s2f_0001815003	1.0016	6.9456	3.6792	0.0016107	0.036722	-1.2448	SLC20A1	sodium-dependent phosphate transporter 1
s2f_0001649007	0.78797	5.4574	3.675	0.0016262	0.03685	-1.254	SYMBB.V1.2.005110.T1	solute carrier family 43 member 3-like
s2f_0001335003	0.53921	8.1675	3.6749	0.0016267	0.03685	-1.2543	HEBP2	heme-binding protein 2
s2f_0000346008	-0.59357	5.1798	-3.6697	0.001646	0.037137	-1.2655	MSH3	dna mismatch repair protein msh3 isoform x1
s2f_0144861001	-0.66193	4.1664	-3.6696	0.0016464	0.037137	-1.2657	s2f_0144861001	extensin-like
s2f_0093715001	0.71449	5.7748	3.6668	0.0016566	0.037288	-1.2716	s2f_0093715001	histone acetyltransferase kat6a-like isoform x1
s2f_0000974007	0.98177	5.6839	3.6658	0.0016604	0.037293	-1.2737	BMA-REGE-1	probable ribonuclease zc3h12c
s2f_0000022013	1.3562	6.1956	3.6618	0.0016757	0.03746	-1.2825	AGABI2DRAFT_145954	cytochrome p450 4c1-like
s2f_0018401001	1.435	2.0459	3.6602	0.001682	0.03746	-1.286	s2f_0018401001	astakine-like
s2f_0144912001	-0.89712	2.8311	-3.6616	0.0016763	0.03746	-1.2828	s2f_0144912001	uncharacterized protein loc113803423
s2f_0022034001	1.1568	2.0958	3.6585	0.0016883	0.037522	-1.2896	SYMBB.V1.2.004788.T1	hypothetical protein
s2f_0001089003	0.67529	7.2712	3.6571	0.0016937	0.037563	-1.2926	VHA16	v-type proton atpase 16 kda proteolipid subunit
s2f_0001271006	0.90054	2.9629	3.6504	0.0017197	0.037981	-1.3071	CG11149	beta-1,4-glucuronyltransferase 1
s2f_0004004001	0.50101	5.7917	3.6486	0.0017265	0.038033	-1.3109	BMA-RFIP-1	rab11 family-interacting protein 4b isoform x1
s2f_0003382003	-0.56241	3.2961	-3.6479	0.0017293	0.038033	-1.3124	CDT1	dna replication factor cdt1
s2f_0007312002	0.70331	3.7876	3.6247	0.0018229	0.039866	-1.3625	DSIM_SPZ	protein spaetzle-like
s2f_0144709001	-0.76342	5.2619	-3.6245	0.0018239	0.039866	-1.363	s2f_0144709001	uncharacterized protein loc113810162
s2f_0000049036	0.60016	8.772	3.6213	0.001837	0.04007	-1.3698	BM11713	organic cation transporter protein-like
s2f_0001567003	0.44279	7.5131	3.5883	0.0019796	0.042651	-1.4408	BMA-TNS-1	tensin-3 isoform x1
s2f_0383395001	1.1276	0.39198	3.5851	0.0019943	0.042831	-1.4478	s2f_0383395001	uncharacterized protein loc121878677
s2f_0024049001	-1.2456	-0.25607	-3.5838	0.002	0.042831	-1.4506	s2f_0024049001	(genbank) hypothetical protein
s2f_0001633001	-0.60099	2.9914	-3.5827	0.0020052	0.042854	-1.453	PDCD2L	programmed cell death protein 2-like
s2f_0002786003	0.82493	3.8054	3.5796	0.0020192	0.042981	-1.4596	BICC2	protein bicaudal c
s2f_0002585004	1.208	4.2062	3.576	0.0020359	0.043249	-1.4674	BM6281	glucosylceramidase-like
s2f_0003565002	1.0845	3.6418	3.575	0.0020406	0.043261	-1.4696	CG33177	microsomal glutathione s-transferase 1-like
s2f_0000102004	1.1544	6.8132	3.5555	0.0021325	0.04478	-1.5114	ACS-10	4-coumarate--coa ligase 1-like
s2f_0000768003	0.72465	8.0507	3.5545	0.0021372	0.04478	-1.5135	SRR	l-threonine ammonia-lyase-like
s2f_0000139003	0.68339	3.4677	3.5434	0.0021916	0.04582	-1.5374	SI:CH211-196H16.12	regulator of g-protein signaling 5-like
s2f_0000021001	1.3185	-3.59	3.5393	0.0022122	0.04616	-1.5462	PTPN9	tyrosine-protein phosphatase non-receptor type 9
s2f_0002908003	0.7657	3.3891	3.5383	0.0022173	0.046175	-1.5484	ZGC:153913	carboxypeptidase n subunit 2-like
s2f_0002741002	1.3207	2.247	3.527	0.0022745	0.047015	-1.5726	SI:DKEY-197J19.6	neural wiskott-aldrich syndrome protein-like
s2f_0004811002	1.0547	2.4278	3.526	0.0022799	0.047015	-1.5748	FAM213A	redox-regulatory protein fam213a-like
s2f_0000233002	-0.88509	0.61489	-3.5267	0.0022764	0.047015	-1.5734	KCNH3	potassium voltage-gated channel subfamily h member 8-like
s2f_0000705005	0.73844	8.2596	3.526	0.0022798	0.047015	-1.5748	CBR-GST-11	glutathione s-transferase-like
s2f_0001504004	0.76942	4.4183	3.5251	0.0022847	0.047023	-1.5768	s2f_0001504004	lactosylceramide 4-alpha-galactosyltransferase-like
s2f_0004604002	-0.61871	3.331	-3.5232	0.0022946	0.047135	-1.5809	PEX12	hypothetical protein
s2f_0000691003	0.62567	7.379	3.5218	0.0023018	0.047191	-1.5839	ATP6V0A4	v-type proton atpase 116 kda subunit a
s2f_0045075001	0.56936	3.6997	3.5115	0.0023558	0.048204	-1.6058	s2f_0045075001	(genbank) conserved hypothetical protein
s2f_0004874004	0.70956	7.8651	3.5099	0.0023644	0.048287	-1.6093	s2f_0004874004	cordon-bleu protein-like 1 isoform x1
s2f_0014831001	-1.3745	12.074	-3.5062	0.0023845	0.048603	-1.6173	DYAK_SCP1	sarcoplasmic calcium-binding protein 1 isoform x1
s2f_0144725001	1.2146	0.80845	3.4974	0.0024322	0.049218	-1.6361	s2f_0144725001	uncharacterized protein loc113802474
s2f_0381271001	1.2268	2.0226	3.4972	0.0024332	0.049218	-1.6365	s2f_0381271001	flocculation protein flo11-like
s2f_0000264002	1.0973	4.4248	3.4959	0.0024407	0.049275	-1.6394	GAL	beta-galactosidase-like
s2f_0383351001	2.0229	-0.22062	3.4853	0.0024997	0.05037	-1.662	s2f_0383351001	gamma-gliadin-like
s2f_0144559001	1.2228	2.2458	3.484	0.002507	0.050421	-1.6648	s2f_0144559001	uncharacterized protein loc121856634 isoform x1
s2f_0000231008	0.59704	5.2902	3.4828	0.0025141	0.050469	-1.6675	CWO	transcription factor cwo isoform x1
s2f_0003766002	0.61696	3.2305	3.4785	0.0025384	0.05081	-1.6766	ALG1	chitobiosyldiphosphodolichol beta-mannosyltransferase
s2f_0000377009	1.5082	0.87716	3.4781	0.0025408	0.05081	-1.6775	AGABI1DRAFT_114495	hypothetical protein
s2f_0004445001	0.71672	1.3838	3.4737	0.0025664	0.051227	-1.687	PDGFB	platelet-derived growth factor subunit b
s2f_0036026001	3.6088	0.65412	3.4719	0.0025766	0.051291	-1.6907	s2f_0036026001	(genbank) hypothetical protein
s2f_0112764001	3.4502	1.2938	3.4715	0.0025793	0.051291	-1.6917	s2f_0112764001	endochitinase a-like
s2f_0001668001	0.64161	3.8052	3.4692	0.0025922	0.05145	-1.6964	GALK1	galactokinase
s2f_0144782001	3.25	1.7703	3.4664	0.0026087	0.051681	-1.7025	s2f_0144782001	uncharacterized protein loc108671840
s2f_0007044001	1.3779	2.1571	3.4608	0.0026422	0.052246	-1.7145	SYMBB.V1.2.006377.T1	putative atp-dependent rna helicase tdrd12
s2f_0080116001	0.53725	4.0929	3.4592	0.0026519	0.052336	-1.718	s2f_0080116001	uncharacterized protein loc107078786
s2f_0219531001	1.4064	-0.38947	3.4584	0.0026566	0.052336	-1.7197	s2f_0219531001	early nodulin-75-like
s2f_0003834001	-0.64787	2.8693	-3.4575	0.0026622	0.052348	-1.7216	MEMO1	protein memo1
s2f_0021009001	0.81558	5.564	3.4531	0.0026883	0.052763	-1.7309	SYMBB.V1.2.009867.T1	phosphonoacetaldehyde hydrolase-like
s2f_0000058017	1.1956	6.5286	3.4505	0.0027043	0.052957	-1.7365	CYP354A1	cytochrome p450 9e2-like
s2f_0003992004	2.2171	-0.75274	3.4491	0.0027127	0.052957	-1.7395	ARX	gametocyte-specific factor 1 homolog
s2f_0002032006	-0.58144	12.684	-3.4488	0.002715	0.052957	-1.7402	BM10785	troponin t, skeletal muscle isoform x1
s2f_0001239003	1.3871	3.1253	3.4482	0.0027182	0.052957	-1.7414	PGLYRP5	peptidoglycan-recognition protein sc2-like
s2f_0380795001	1.0763	6.934	3.4446	0.0027409	0.053302	-1.7492	s2f_0380795001	translation initiation factor if-2-like isoform x1
s2f_0000934009	-0.52743	4.0488	-3.4339	0.0028074	0.054494	-1.7719	LGR	lutropin-choriogonadotropic hormone receptor-like
s2f_0382428001	2.3153	-2.1299	3.426	0.0028583	0.055359	-1.7889	s2f_0382428001	bud13 homolog
s2f_0019369001	1.9038	-0.55858	3.4253	0.0028624	0.055359	-1.7903	s2f_0019369001	arylamine n-acetyltransferase
s2f_0000436004	1.0386	2.5062	3.4226	0.0028802	0.055601	-1.7961	CYP-44A1	probable cytochrome p450 cyp44
s2f_0003769007	2.9982	5.6191	3.4208	0.002892	0.055729	-1.8	SYMBB.V1.2.031196.T1	(oist) -
s2f_0381120001	2.949	-1.5017	3.4105	0.0029598	0.05693	-1.8219	s2f_0381120001	uncharacterized protein loc121859233
s2f_0016056001	0.89613	4.1087	3.4085	0.0029736	0.057007	-1.8263	s2f_0016056001	(genbank) hypothetical protein
s2f_0000105024	0.84453	4.9435	3.4083	0.0029745	0.057007	-1.8266	BM5891	matrix metalloproteinase-2-like
s2f_0112892001	2.7506	0.39275	3.4027	0.0030128	0.057562	-1.8387	s2f_0112892001	uncharacterized protein loc108676872
s2f_0071077001	2.1916	1.9449	3.4023	0.003015	0.057562	-1.8394	s2f_0071077001	solute carrier family 22 member 6-like
s2f_0381792001	-1.0406	-0.18065	-3.4004	0.0030283	0.057562	-1.8435	s2f_0381792001	dead-box atp-dependent rna helicase 21-like
s2f_0112806001	0.9126	3.3852	3.4002	0.0030298	0.057562	-1.844	s2f_0112806001	serine-rich adhesin for platelets-like
s2f_0112766001	1.0361	2.7523	3.4	0.0030307	0.057562	-1.8443	s2f_0112766001	serine/arginine repetitive matrix protein 1-like isoform x1
s2f_0380383001	1.2499	-2.3911	3.3978	0.003046	0.057748	-1.849	s2f_0380383001	glycine-rich cell wall structural protein-like
s2f_0080067001	1.0802	3.3711	3.395	0.0030655	0.058015	-1.8551	s2f_0080067001	mucin-2-like
s2f_0000512001	2.9355	2.9387	3.3933	0.0030772	0.058131	-1.8587	BM6541	proton-coupled amino acid transporter 1-like
s2f_0002654001	0.81684	4.1658	3.3907	0.0030954	0.05837	-1.8642	BM13049	fibrillin-1-like
s2f_0001641004	-0.78007	7.2496	-3.3879	0.0031149	0.058635	-1.8702	RNR2	hypothetical protein
s2f_0002090001	0.80911	6.381	3.3825	0.0031525	0.059237	-1.8815	s2f_0002090001	methyltransferase-like protein 7a
s2f_0000031033	0.66216	2.6944	3.3801	0.0031696	0.059452	-1.8866	FOXB2	forkhead box protein b2
s2f_0112924001	3.2201	-1.2101	3.3754	0.0032034	0.059981	-1.8967	s2f_0112924001	uncharacterized protein loc108675891
s2f_0383202001	2.4668	-2.0166	3.3734	0.0032181	0.060149	-1.901	s2f_0383202001	uncharacterized protein loc121876846
s2f_0112810001	-0.54566	4.053	-3.3589	0.0033249	0.062035	-1.9318	s2f_0112810001	math and lrr domain-containing protein pfe0570w-like
s2f_0002485004	3.1723	0.3887	3.3559	0.0033476	0.062346	-1.9382	s2f_0002485004	hypothetical protein
s2f_0000614006	0.7224	4.9025	3.3548	0.0033556	0.062346	-1.9405	BM18178	vesicular inhibitory amino acid transporter-like
s2f_0000683006	0.48304	7.0379	3.3543	0.0033592	0.062346	-1.9415	CBR-DAO-3	c-1-tetrahydrofolate synthase, cytoplasmic isoform x1
s2f_0007496001	-0.48132	3.689	-3.3533	0.0033674	0.062388	-1.9438	CBR-SGCB-1	beta-sarcoglycan-like
s2f_0144765001	0.88027	1.446	3.352	0.0033771	0.062459	-1.9465	s2f_0144765001	uncharacterized protein loc113821092
s2f_0015175001	0.78748	2.3966	3.3489	0.0034007	0.062786	-1.9531	CG1136	(genbank) uncharacterized protein
s2f_0004480003	1.3614	4.8711	3.3401	0.0034686	0.063928	-1.9717	BM11094	tripartite motif-containing protein 2-like
s2f_0144854001	1.0682	0.81885	3.3372	0.0034915	0.064162	-1.9779	s2f_0144854001	uncharacterized protein loc113813464
s2f_0000377002	2.3519	-2.399	3.3366	0.0034962	0.064162	-1.9792	AGABI1DRAFT_39707	hypothetical protein
s2f_0144612001	2.7214	-1.5773	3.3362	0.0034995	0.064162	-1.9801	s2f_0144612001	uncharacterized protein loc113808844
s2f_0064110001	2.5639	1.1023	3.3284	0.003561	0.065176	-1.9965	s2f_0064110001	uncharacterized protein loc113809107
s2f_0020230001	0.94634	4.4325	3.3252	0.0035868	0.065493	-2.0033	s2f_0020230001	(genbank) hypothetical protein
s2f_0001479004	0.75845	3.2208	3.3247	0.0035907	0.065493	-2.0044	HPA3	hypothetical protein
s2f_0004850001	-0.61204	2.3389	-3.3224	0.0036094	0.065721	-2.0093	AGABI1DRAFT_122836	haloacid dehalogenase-like hydrolase domain-containing protein 2
s2f_0002068005	1.1737	3.6003	3.3187	0.0036398	0.066161	-2.0172	AIM17	hypothetical protein
s2f_0001672008	0.73442	5.7527	3.3168	0.0036552	0.066327	-2.0212	BMA-CEBP-2	ccaat/enhancer-binding protein
s2f_0000253001	1.9364	1.8222	3.3136	0.0036818	0.066695	-2.028	CG5535	cationic amino acid transporter 2-like
s2f_0380542001	2.7657	-0.90976	3.3121	0.0036944	0.066809	-2.0312	s2f_0380542001	uncharacterized protein loc121854789
s2f_0144773001	3.582	-0.82581	3.3026	0.0037739	0.068129	-2.0513	s2f_0144773001	uncharacterized protein loc113804725
s2f_0383468001	2.6379	-0.35959	3.3004	0.0037927	0.068238	-2.056	s2f_0383468001	serine-rich 25 kda antigen protein-like
s2f_0004028003	0.65234	6.6672	3.3004	0.0037928	0.068238	-2.056	BMA-VHA-10	v-type proton atpase subunit g
s2f_0000688001	0.86985	7.7554	3.2938	0.0038488	0.069129	-2.0698	LARP6	la-related protein 6-like
s2f_0001190001	0.59779	4.4352	3.2902	0.0038799	0.069569	-2.0774	BMM	patatin-like phospholipase domain-containing protein 2
s2f_0000521015	-0.59398	1.0813	-3.2883	0.0038973	0.069683	-2.0816	s2f_0000521015	protein alp1-like
s2f_0093833001	3.0945	-0.20379	3.288	0.0038994	0.069683	-2.0821	s2f_0093833001	collagen alpha-1(xiv) chain-like isoform x1
s2f_0000090009	-0.62034	5.2825	-3.2828	0.003945	0.070332	-2.0931	PPIA	peptidyl-prolyl cis-trans isomerase e
s2f_0001547004	-0.96939	0.77485	-3.2824	0.0039491	0.070332	-2.0941	SMYD5	set and mynd domain-containing protein 5
s2f_0006933002	-0.52814	3.3592	-3.2776	0.0039918	0.070973	-2.1042	AN15G01340	centromere protein i-like
s2f_0016508001	-1.5708	-3.0895	-3.2744	0.0040207	0.071331	-2.111	CDA1	hypothetical protein
s2f_0015299001	1.5984	3.9508	3.2738	0.0040254	0.071331	-2.1121	s2f_0015299001	atrial natriuretic peptide-converting enzyme-like
s2f_0035655001	2.396	0.52059	3.2709	0.0040525	0.07169	-2.1184	s2f_0035655001	apolipoprotein d-like
s2f_0011192001	0.98621	0.85697	3.2669	0.0040888	0.072213	-2.1268	FUOM	fucose mutarotase
s2f_0112922001	-1.2902	4.6978	-3.2647	0.0041091	0.07245	-2.1315	s2f_0112922001	acanthoscurrin-1-like
s2f_0001324002	0.89675	2.512	3.2511	0.0042356	0.074557	-2.16	AGABI1DRAFT_122203	hypothetical protein
s2f_0200649001	1.0157	-0.081982	3.2469	0.0042766	0.075152	-2.1691	s2f_0200649001	uncharacterized protein loc121878060
s2f_0382569001	2.6471	-1.5706	3.2455	0.0042899	0.07526	-2.172	s2f_0382569001	mucin-2-like isoform x1
s2f_0003212002	0.55489	5.0522	3.2447	0.0042969	0.07526	-2.1735	GUAD	guanine deaminase
s2f_0000485009	0.59064	7.2718	3.2418	0.0043252	0.07563	-2.1797	ZK822.5	sodium-coupled monocarboxylate transporter 1-like
s2f_0000447010	0.52087	5.1898	3.2369	0.0043726	0.076333	-2.19	BMA-HXK-1.1	hexokinase type 2
s2f_0008038001	2.6206	2.1598	3.2309	0.0044317	0.077237	-2.2026	TDRD1	tudor domain-containing protein 1 isoform x1
s2f_0000645001	0.85048	4.8701	3.229	0.0044511	0.077333	-2.2067	GRAMD1C	protein aster-c isoform x1
s2f_0000665005	0.49812	8.3014	3.2289	0.0044518	0.077333	-2.2069	SOD1	superoxide dismutase [cu-zn]-like
s2f_0093811001	-0.50104	5.0884	-3.2164	0.0045787	0.079354	-2.2333	s2f_0093811001	peptidyl-prolyl cis-trans isomerase 1-like
s2f_0000954002	1.0553	1.6818	3.2159	0.0045831	0.079354	-2.2342	SLC11A1	natural resistance-associated macrophage protein 2-like
s2f_0007426001	0.61822	5.3345	3.2138	0.0046052	0.079605	-2.2387	CG6770	nuclear protein 1
s2f_0380767001	-1.8973	-2.9411	-3.211	0.0046334	0.079962	-2.2444	s2f_0380767001	circumsporozoite protein-like
s2f_0000273009	0.85769	3.7163	3.2059	0.0046874	0.080762	-2.2553	BM4951	astacin
s2f_0001252004	0.5473	3.6792	3.2008	0.004741	0.081554	-2.266	BM2667	glycoprotein-n-acetylgalactosamine 3-beta-galactosyltransferase 1-like
s2f_0005411003	-2.4492	-0.3557	-3.1992	0.0047579	0.081711	-2.2694	s2f_0005411003	kelch-like protein 42
s2f_0144939001	2.739	-0.13829	3.1946	0.0048069	0.082418	-2.279	s2f_0144939001	uncharacterized protein loc113805028
s2f_0005619002	-0.54616	6.1717	-3.1917	0.0048382	0.082821	-2.2851	DPP3-2	hypothetical protein
s2f_0000515003	0.82176	4.0399	3.1907	0.0048486	0.082865	-2.2871	ZGC:110410	protein lifeguard 1-like
s2f_0011691001	2.0461	1.4063	3.1873	0.004886	0.08337	-2.2943	AN07G00350	sulfoquinovosidase-like
s2f_0144498001	2.0734	-0.61026	3.1838	0.0049246	0.083893	-2.3017	s2f_0144498001	uncharacterized protein loc113801797
s2f_0003018001	1.0475	4.6079	3.1814	0.0049511	0.084209	-2.3068	PNP1	hypothetical protein
s2f_0008033001	0.66893	4.0411	3.179	0.0049771	0.084344	-2.3117	M153.4	hypothetical protein
s2f_0021349001	-0.72547	2.3806	-3.178	0.0049885	0.084344	-2.3138	SYMBB.V1.2.002736.T1	hypothetical protein
s2f_0003669002	0.89044	4.3482	3.1777	0.0049919	0.084344	-2.3145	DPL1	sphingosine-1-phosphate lyase
s2f_0008606002	-0.59946	5.6042	-3.1768	0.0050021	0.084344	-2.3164	CPLANE1	ciliogenesis and planar polarity effector 1 isoform x1
s2f_0027143001	1.108	3.2305	3.1765	0.0050058	0.084344	-2.3171	s2f_0027143001	mucin-5b-like
s2f_0005611001	-0.4756	5.0378	-3.1763	0.0050073	0.084344	-2.3173	DSIM_GD21486	vacuolar protein sorting-associated protein 13b-like
s2f_0001504001	2.8289	-1.0761	3.1755	0.0050163	0.084344	-2.319	GT32A1	uncharacterized protein at4g19900
s2f_0144839001	3.0341	-0.45454	3.1749	0.0050229	0.084344	-2.3203	s2f_0144839001	tripartite motif-containing protein 65-like isoform x1
s2f_0380789001	3.1536	0.78835	3.1677	0.0051049	0.085586	-2.3355	s2f_0380789001	dna-directed rna polymerase ii subunit rpb1-like
s2f_0000932003	0.53702	4.905	3.1617	0.0051735	0.086598	-2.348	REXO1	hypothetical protein
s2f_0112889001	1.1359	0.90629	3.1594	0.0051998	0.086902	-2.3528	s2f_0112889001	extensin-1-like
s2f_0144687001	0.81728	3.2443	3.1566	0.0052326	0.087311	-2.3587	s2f_0144687001	uncharacterized protein loc113828277
s2f_0002911003	0.44845	5.8009	3.1542	0.0052605	0.087557	-2.3637	BAZ	partitioning defective 3 homolog isoform x1
s2f_0000072014	0.67478	6.9718	3.1533	0.0052709	0.087557	-2.3655	W	protein white-like
s2f_0000256014	0.67602	6.569	3.1532	0.0052721	0.087557	-2.3657	BM10239	low-density lipoprotein receptor-related protein 2-like
s2f_0009936003	0.72411	5.0287	3.1504	0.0053055	0.087973	-2.3716	DOME	cytokine receptor-like
s2f_0006519002	0.6219	3.668	3.1473	0.0053421	0.088442	-2.3781	SI:CH1073-184J22.1	erythroferrone-like
s2f_0001575001	0.65618	5.2259	3.1458	0.0053604	0.088551	-2.3813	WEE1	wee1-like protein kinase
s2f_0382579001	-1.8005	-2.9561	-3.1454	0.0053655	0.088551	-2.3822	s2f_0382579001	keratin-associated protein 10-3-like
s2f_0002322003	0.55262	3.8628	3.1408	0.0054206	0.089321	-2.3918	1.T00155	uncharacterized golgi apparatus membrane protein-like protein cg5021 isoform x1
s2f_0011823001	1.9843	5.0089	3.1397	0.0054339	0.089326	-2.3941	DSIM_GD28825	(genbank) hypothetical protein
s2f_0114719001	-1.0462	-0.33634	-3.1382	0.0054515	0.089326	-2.3971	ZFP966, GM8898	zinc finger protein 271-like
s2f_0000608008	0.78653	5.8834	3.1382	0.0054522	0.089326	-2.3972	CYSB	cystathionine beta-synthase
s2f_0003373001	-1.0215	0.48644	-3.138	0.0054546	0.089326	-2.3976	RIC8A	synembryn-a
s2f_0000346010	2.2064	-1.5048	3.1365	0.0054724	0.089478	-2.4007	MSH4	hypothetical protein
s2f_0009616002	0.72134	4.6415	3.134	0.0055027	0.089835	-2.4059	ARHGEF33	rho guanine nucleotide exchange factor 33 isoform x1
s2f_0383043001	1.8744	-2.3507	3.1304	0.0055471	0.090421	-2.4134	s2f_0383043001	uncharacterized protein loc121875648
s2f_0144887001	1.0533	0.49025	3.1276	0.0055824	0.090855	-2.4193	s2f_0144887001	uncharacterized protein loc113800556
s2f_0001347006	-0.61556	11.377	-3.1256	0.005607	0.091116	-2.4235	TPNI	troponin i isoform x1
s2f_0080080001	3.2166	1.3086	3.1242	0.0056245	0.09126	-2.4264	s2f_0080080001	caspase-8-like
s2f_0000090005	0.55201	7.7697	3.1217	0.0056561	0.09156	-2.4316	PPIB	peptidyl-prolyl cis-trans isomerase b
s2f_0080103001	-0.83833	4.7706	-3.1213	0.0056603	0.09156	-2.4323	s2f_0080103001	uncharacterized protein loc113816149
s2f_0007779002	1.205	1.5523	3.1167	0.0057188	0.092266	-2.442	NIPSNAP3A	protein nipsnap homolog 3a
s2f_0381964001	-1.5084	-3.6873	-3.1165	0.0057214	0.092266	-2.4424	s2f_0381964001	uncharacterized protein loc121866242
s2f_0093780001	1.0372	2.3105	3.1143	0.0057491	0.092572	-2.4469	s2f_0093780001	uncharacterized protein loc113803285
s2f_0000582008	2.5298	1.5609	3.1131	0.0057651	0.092689	-2.4495	BM1972	integrin beta-1-like
s2f_0001751006	1.3198	2.431	3.1113	0.0057885	0.092924	-2.4533	AGABI1DRAFT_112512	hypothetical protein
s2f_0000323007	2.9704	2.6417	3.1096	0.0058101	0.093129	-2.4568	ECM14	carboxypeptidase b-like
s2f_0000384007	1.4378	5.5644	3.1076	0.0058363	0.093408	-2.461	POR	nadph--cytochrome p450 reductase isoform x1
s2f_0381708001	1.4069	-3.2029	3.1062	0.0058547	0.093504	-2.464	s2f_0381708001	collagen alpha-2(viii) chain-like
s2f_0382383001	-1.7604	-3.3378	-3.1056	0.0058615	0.093504	-2.4651	s2f_0382383001	putative protein tprxl
s2f_0000064007	1.3593	3.1029	3.1051	0.0058689	0.093504	-2.4662	DSIM_GD10818	monocarboxylate transporter 12
s2f_0381144001	-1.367	-3.7319	-3.1032	0.0058935	0.093756	-2.4702	s2f_0381144001	putative uncharacterized protein ensp00000383309
s2f_0007761002	0.55656	1.894	3.1015	0.0059161	0.093973	-2.4737	CBR-PRX-11	peroxisomal membrane protein 11c
s2f_0001723004	0.47881	7.5212	3.1007	0.0059261	0.093991	-2.4753	SEC61A2	protein transport protein sec61 subunit alpha
s2f_0000205003	1.5578	-2.0015	3.0998	0.0059383	0.094043	-2.4773	DSIM_GD13857	probable tubulin polyglutamylase ttll1
s2f_0016139001	1.9035	-1.911	3.0982	0.0059594	0.094237	-2.4806	DSIM_GD25369	ets dna-binding protein pokkuri
s2f_0007152001	2.5405	1.3243	3.0958	0.0059909	0.094593	-2.4855	AN07G01010	n-sulphoglucosamine sulphohydrolase
s2f_0000273013	1.2909	-1.2451	3.0915	0.0060492	0.095371	-2.4946	s2f_0000273013	astacin-like metalloprotease toxin 5
s2f_0113098001	0.71901	4.828	3.0823	0.0061728	0.097176	-2.5135	s2f_0113098001	uncharacterized protein loc108679867
s2f_0144901001	-0.84325	1.9579	-3.0816	0.0061829	0.097182	-2.5151	s2f_0144901001	cop1-interactive protein 1-like
s2f_0006142001	-0.51233	2.1433	-3.081	0.0061916	0.097182	-2.5164	NTPCR	cancer-related nucleoside-triphosphatase
s2f_0002961003	0.6592	1.1224	3.0716	0.006322	0.099082	-2.5359	BM3836	transmembrane and coiled-coil domain-containing protein 4-like
s2f_0383257001	1.4598	-3.5008	3.0702	0.0063418	0.099246	-2.5388	s2f_0383257001	uncharacterized protein spem3-like
s2f_0000629006	0.66071	5.2402	3.0686	0.0063643	0.099451	-2.5421	XDH	xanthine dehydrogenase/oxidase-like
s2f_0000291016	0.81312	9.1722	3.0643	0.0064244	0.10024	-2.5509	BM16888	protein lethal(2)essential for life-like
s2f_0000079009	-0.93552	1.7253	-3.0632	0.0064404	0.10034	-2.5532	STYX	serine/threonine/tyrosine-interacting protein
s2f_0093795001	-0.50605	4.4242	-3.0615	0.0064649	0.10058	-2.5568	s2f_0093795001	copii coat assembly protein sec16-like isoform x1
s2f_0383008001	-2.0043	-2.5241	-3.0607	0.0064759	0.1006	-2.5584	s2f_0383008001	uncharacterized protein loc121875390
s2f_0006445002	-0.42434	5.2514	-3.0596	0.006492	0.1007	-2.5607	NUP133	nuclear pore complex protein nup133
s2f_0001390007	0.54502	6.1071	3.0582	0.006513	0.10088	-2.5637	BZPD	hypothetical protein
s2f_0070889001	-1.3767	-1.6519	-3.0546	0.0065641	0.10152	-2.571	s2f_0070889001	u-scoloptoxin(05)-er1a-like
s2f_0001150003	0.55925	3.406	3.0517	0.0066074	0.10204	-2.5772	BM6474	zinc transporter 2-like
s2f_0000797023	-1.4699	4.7532	-3.0471	0.0066754	0.10294	-2.5867	s2f_0000797023	(genbank) hypothetical protein
s2f_0002287003	0.75156	5.3844	3.0422	0.0067479	0.10391	-2.5968	PIPOX	peroxisomal sarcosine oxidase
s2f_0382131001	1.8128	-1.0579	3.0384	0.0068042	0.1045	-2.6046	s2f_0382131001	uncharacterized protein loc121867511
s2f_0000345020	0.49715	3.4993	3.0383	0.0068062	0.1045	-2.6049	BM4289	solute carrier organic anion transporter family member 4a1-like
s2f_0005534001	-0.46826	5.5443	-3.0368	0.0068282	0.10469	-2.6079	BMA-HCP-6	condensin-2 complex subunit d3
s2f_0000431006	0.91753	0.86858	3.0348	0.0068596	0.10489	-2.6122	MAP1LC3C	microtubule-associated proteins 1a/1b light chain 3c
s2f_0000116006	0.82371	1.3839	3.0347	0.0068611	0.10489	-2.6124	SOX10	transcription factor sox-8
s2f_0200626001	0.98143	2.2723	3.026	0.0069939	0.10668	-2.6303	s2f_0200626001	myelin transcription factor 1-like protein
s2f_0000551006	-0.5203	1.2736	-3.0257	0.0069984	0.10668	-2.6309	TRF-2	tnf receptor-associated factor 6-like
s2f_0007167001	-0.90365	1.8788	-3.0235	0.007032	0.10698	-2.6354	CMAS	n-acylneuraminate cytidylyltransferase-like
s2f_0039279001	1.475	-1.2221	3.0231	0.0070386	0.10698	-2.6362	s2f_0039279001	fucolectin-5-like
s2f_0381654001	-1.1838	-3.8732	-3.0194	0.0070968	0.10771	-2.6439	s2f_0381654001	involucrin-like
s2f_0070394001	1.2842	-0.45578	3.0142	0.0071795	0.10878	-2.6547	s2f_0070394001	nst1p-like protein
s2f_0112989001	-0.39501	3.4494	-3.0134	0.0071914	0.10878	-2.6563	s2f_0112989001	uncharacterized protein loc108674143
s2f_0001145007	-0.4623	13.736	-3.013	0.0071978	0.10878	-2.6571	ARGK	arginine kinase
s2f_0021460001	0.59157	3.6447	3.0115	0.0072213	0.10898	-2.6601	s2f_0021460001	glutamate-gated chloride channel-like
s2f_0005545002	0.48347	4.3918	3.0107	0.0072349	0.10903	-2.6619	CGT1	ceramide glucosyltransferase
s2f_0003144002	-0.86937	0.75595	-3.0093	0.0072572	0.10921	-2.6648	HOP1	hypothetical protein
s2f_0003625001	0.44952	5.3315	3.0061	0.0073078	0.10981	-2.6713	CG9328	protein fam107b isoform x1
s2f_0000171022	-0.6782	1.2584	-3.0036	0.0073494	0.11028	-2.6766	BMA-SEB-3	corticotropin-releasing factor receptor 1-like
s2f_0000134023	0.5045	3.3228	3.0029	0.0073599	0.11028	-2.6779	BM5450	--
s2f_0144918001	2.5264	-0.12384	3.0017	0.0073797	0.11042	-2.6804	s2f_0144918001	uncharacterized protein loc113811694
s2f_0112875001	-1.0228	-0.74097	-3	0.0074074	0.11048	-2.6839	s2f_0112875001	uncharacterized protein loc108680257 isoform x1
s2f_0000552001	-0.80891	1.5739	-2.9997	0.0074133	0.11048	-2.6846	BM6406	transcription factor adf-1-like
s2f_0382911001	1.2561	-3.5651	2.9991	0.0074226	0.11048	-2.6858	s2f_0382911001	filaggrin-2-like
s2f_0002023003	1.0429	2.0649	2.9989	0.0074253	0.11048	-2.6861	PLD4	phospholipase d3-like
s2f_0144883001	1.3871	0.27848	2.9979	0.0074428	0.11059	-2.6883	s2f_0144883001	uncharacterized protein loc113802628
s2f_0000101002	0.53827	8.6843	2.9967	0.0074612	0.11062	-2.6906	AKR1B	aldose reductase-like
s2f_0144695001	2.6687	0.19475	2.9964	0.007466	0.11062	-2.6912	s2f_0144695001	eukaryotic translation initiation factor 3 subunit a-like
s2f_0014673001	1.0905	0.90913	2.9917	0.0075442	0.11162	-2.701	CG8501	(genbank) hypothetical protein
s2f_0003446003	0.64556	10.574	2.989	0.0075895	0.11214	-2.7065	s2f_0003446003	mfs-type transporter slc18b1-like
s2f_0001485011	1.6324	4.691	2.9839	0.0076756	0.11325	-2.7171	s2f_0001485011	innexin inx2-like
s2f_0003775001	-0.58688	3.4056	-2.9821	0.0077063	0.11354	-2.7208	SSBA	rna-binding protein 42
s2f_0000069010	-0.51434	3.6636	-2.9803	0.0077371	0.11384	-2.7245	ACC-1	hypothetical protein
s2f_0000393001	0.81571	3.4884	2.9795	0.0077497	0.11387	-2.726	NOCT	nocturnin
s2f_0000486003	1.6122	6.4744	2.9766	0.0077998	0.11431	-2.732	CYB5C	cytochrome b5-like
s2f_0381868001	0.86907	-3.8732	2.9762	0.0078075	0.11431	-2.7329	s2f_0381868001	uncharacterized protein loc121865611
s2f_0000814035	-1.894	-2.0369	-2.9759	0.0078125	0.11431	-2.7335	s2f_0000814035	mediator of rna polymerase ii transcription subunit 15
s2f_0004815004	0.45445	6.7088	2.9734	0.0078549	0.11477	-2.7386	s2f_0004815004	isatin hydrolase-like
s2f_0001995003	-0.47245	10.498	-2.9719	0.0078811	0.115	-2.7417	DSIM_GD23326	nesprin-1-like
s2f_0000065011	0.62384	4.0001	2.9689	0.0079345	0.11562	-2.748	RDH12	retinol dehydrogenase 12-like
s2f_0004125005	2.9576	4.1551	2.9609	0.0080745	0.1175	-2.7643	VWA7	von willebrand factor a domain-containing protein 7-like
s2f_0200585001	0.65298	3.1843	2.9594	0.008101	0.11772	-2.7673	s2f_0200585001	uncharacterized protein loc121872912
s2f_0017818001	-1.4635	-1.8652	-2.9578	0.0081308	0.1178	-2.7708	CRZ	pro-corazonin-like
s2f_0048338001	-1.2171	3.5404	-2.9577	0.0081318	0.1178	-2.7709	s2f_0048338001	m-phase phosphoprotein 8-like
s2f_0093730001	1.5277	-2.0168	2.9573	0.0081397	0.1178	-2.7718	s2f_0093730001	mucin-17-like
s2f_0004383001	-0.64961	1.6425	-2.9534	0.0082091	0.1185	-2.7797	LSM12	protein lsm12 homolog
s2f_0007651001	-1.9332	-1.2588	-2.9532	0.0082129	0.1185	-2.7801	PPP1R42	protein phosphatase 1 regulatory subunit 42-like
s2f_0000429001	-0.47826	4.6773	-2.9517	0.0082404	0.1185	-2.7832	ATR	serine/threonine-protein kinase atr
s2f_0002040001	0.62436	5.61	2.9516	0.0082414	0.1185	-2.7833	JRA	transcription factor ap-1
s2f_0080121001	-0.55416	8.7596	-2.9514	0.0082446	0.1185	-2.7837	s2f_0080121001	basic proline-rich protein-like
s2f_0144770001	1.2341	-0.15875	2.9443	0.0083748	0.12021	-2.7983	s2f_0144770001	nlp effector protein 8-like
s2f_0144866001	1.7461	-1.2093	2.9426	0.008406	0.1205	-2.8017	s2f_0144866001	uncharacterized protein loc108680531 isoform x1
s2f_0017571001	1.7172	-1.6087	2.9414	0.0084288	0.12065	-2.8043	s2f_0017571001	(genbank) conserved hypothetical protein
s2f_0000251011	-0.91952	0.40233	-2.9408	0.0084394	0.12065	-2.8054	GBF1	golgi-specific brefeldin a-resistance guanine nucleotide exchange factor 1 isoform x1
s2f_0381359001	-1.3173	-1.941	-2.9401	0.0084537	0.12069	-2.807	s2f_0381359001	mucin-6-like
s2f_0004941003	-0.50207	5.1979	-2.9393	0.0084671	0.12072	-2.8085	ATF7IP	activating transcription factor 7-interacting protein 1
s2f_0000552002	-0.93517	-0.66415	-2.9351	0.0085463	0.12166	-2.8171	s2f_0000552002	transcription factor adf-1-like
s2f_0002557002	-0.53491	2.4921	-2.9346	0.0085562	0.12166	-2.8182	s2f_0002557002	popeye domain-containing protein 3-like
s2f_0200330001	1.8574	-0.93934	2.9316	0.0086126	0.1223	-2.8243	s2f_0200330001	uncharacterized protein loc121853931
s2f_0080069001	-0.82843	5.6861	-2.9249	0.0087394	0.12393	-2.8379	s2f_0080069001	clotting factor b-like
s2f_0144660001	2.2791	-1.0802	2.9175	0.0088829	0.1258	-2.8531	s2f_0144660001	a-agglutinin anchorage subunit-like isoform x1
s2f_0001420001	-0.52923	3.568	-2.9139	0.008954	0.12664	-2.8605	POLL	dna polymerase lambda
s2f_0057209001	1.1294	-0.44148	2.9099	0.0090321	0.12757	-2.8686	s2f_0057209001	(genbank) hypothetical protein
s2f_0001531001	0.75625	3.6897	2.9062	0.0091059	0.12844	-2.8761	ILVBL	acetolactate synthase-like protein
s2f_0006909002	-0.60856	2.951	-2.9043	0.0091442	0.12878	-2.88	155.T00007	cue domain-containing protein 1
s2f_0381857001	-1.8164	-3.0566	-2.9038	0.0091544	0.12878	-2.8811	s2f_0381857001	filaggrin-like
s2f_0144557001	1.7529	0.6286	2.903	0.0091704	0.12884	-2.8827	s2f_0144557001	uncharacterized protein loc113818704
s2f_0144699001	2.0156	-2.5899	2.8982	0.009268	0.13003	-2.8925	s2f_0144699001	uncharacterized protein loc121864581
s2f_0002045003	-0.68552	2.311	-2.8975	0.0092814	0.13005	-2.8939	BHLHE22	class e basic helix-loop-helix protein 22
s2f_0019334001	-0.70155	3.4826	-2.8969	0.0092934	0.13005	-2.8951	s2f_0019334001	(genbank) hypothetical protein
s2f_0000043030	-0.73567	14.641	-2.8953	0.0093257	0.13033	-2.8983	s2f_0000043030	actin-like
s2f_0000416014	0.50891	4.1568	2.888	0.0094777	0.13227	-2.9133	s2f_0000416014	integrin alpha-ps3-like
s2f_0004542001	-0.81972	2.9209	-2.8863	0.0095127	0.13259	-2.9167	CG43867	uncharacterized protein cg43867 isoform x1
s2f_0004478001	1.9233	-2.0295	2.8851	0.0095375	0.13276	-2.9191	DSIM_DY	(genbank) conserved hypothetical protein
s2f_0002897001	-0.62634	6.6377	-2.884	0.0095591	0.13289	-2.9212	BM6060	f-box/lrr-repeat protein 2 isoform x1
s2f_0014115001	-0.65456	1.9406	-2.875	0.0097494	0.13535	-2.9395	s2f_0014115001	proline-rich transmembrane protein 4-like
s2f_0382900001	-1.619	-3.3187	-2.8733	0.0097864	0.13569	-2.943	s2f_0382900001	mrna decay activator protein zfp36l3-like
s2f_0144664001	-0.93836	0.44616	-2.8723	0.0098087	0.13582	-2.9452	s2f_0144664001	uncharacterized protein loc113824945
s2f_0000713002	0.60166	3.5489	2.8711	0.0098331	0.13584	-2.9475	MFSD10	major facilitator superfamily domain-containing protein 10
s2f_0144897001	1.3201	0.73133	2.871	0.0098359	0.13584	-2.9477	s2f_0144897001	extensin-like isoform x1
s2f_0380530001	-1.1838	-3.8732	-2.8667	0.0099297	0.13696	-2.9565	s2f_0380530001	stress protein ddr48-like
s2f_0001245002	-0.51242	5.5295	-2.8641	0.009985	0.13754	-2.9617	BM13796	dna polymerase delta catalytic subunit
s2f_0000828003	0.6401	5.9946	2.8588	0.010103	0.13898	-2.9725	ALDH-III	aldehyde dehydrogenase, dimeric nadp-preferring-like
s2f_0016881001	-0.63089	5.3624	-2.8562	0.01016	0.13949	-2.9778	s2f_0016881001	hypothetical protein
s2f_0001276002	1.4245	4.3033	2.8555	0.010175	0.13949	-2.9792	DSIM_GD11582	glucose-6-phosphate exchanger slc37a2 isoform x1
s2f_0000014009	1.1547	5.0571	2.8551	0.010183	0.13949	-2.9799	MYO1C	unconventional myosin-ic isoform x1
s2f_0001216005	-1.4579	-0.014885	-2.8547	0.010193	0.13949	-2.9808	ADOR	adenosine receptor a2b-like
s2f_0001399001	1.407	3.3345	2.8519	0.010255	0.14017	-2.9865	EGR4	early growth response protein 4-like
s2f_0004960002	0.54763	6.6967	2.8494	0.010311	0.1407	-2.9915	DSIM_GD14453	bag domain-containing protein samui isoform x1
s2f_0007006003	1.3712	1.9215	2.849	0.010321	0.1407	-2.9924	s2f_0007006003	(genbank) pro-resilin
s2f_0004486001	-0.69934	1.7953	-2.8406	0.01051	0.1431	-3.0092	URM1	ubiquitin-related modifier 1
s2f_0000785006	-0.57984	2.3007	-2.8399	0.010527	0.14314	-3.0107	NTRK1	high affinity nerve growth factor receptor
s2f_0001345001	-0.5897	5.067	-2.8378	0.010576	0.14353	-3.015	NFAT5	nuclear factor of activated t-cells 5 isoform x1
s2f_0000179016	-0.85393	1.4101	-2.8369	0.010595	0.14353	-3.0167	BMA-PDE-1	calcium/calmodulin-dependent 3',5'-cyclic nucleotide phosphodiesterase 1a-like isoform x1
s2f_0006711001	0.64519	4.1	2.8369	0.010596	0.14353	-3.0167	BM4219	ribonuclease kappa
s2f_0014227001	-0.42496	4.0924	-2.8353	0.010634	0.14376	-3.0201	CG7044	(genbank) uncharacterized protein
s2f_0000178023	0.63151	5.5502	2.835	0.01064	0.14376	-3.0206	CG7367	pancreatic lipase-related protein 2-like
s2f_0093694001	0.50604	4.7724	2.8339	0.010666	0.14392	-3.0228	s2f_0093694001	obscurin-like
s2f_0005608001	0.92691	4.3001	2.8309	0.010737	0.14469	-3.0289	AN04G07230	cysteine dioxygenase type 1
s2f_0000093017	0.73689	3.7781	2.8295	0.010769	0.14495	-3.0317	BM10555	beta-1,3-galactosyltransferase 5-like
s2f_0001271003	-0.62636	3.9507	-2.8285	0.010791	0.14505	-3.0336	CG3253	beta-1,4-glucuronyltransferase 1
s2f_0001961003	-0.82961	-0.15358	-2.8275	0.010815	0.14519	-3.0357	GP63-2	hypothetical protein
s2f_0008640002	1.0219	1.018	2.827	0.010828	0.14519	-3.0368	EFCC1	ef-hand and coiled-coil domain-containing protein 1
s2f_0001121008	0.50354	8.0985	2.8261	0.010849	0.14522	-3.0386	BMA-SMA-1	spectrin beta chain, non-erythrocytic 5 isoform x1
s2f_0002777003	0.88709	1.4758	2.8257	0.010858	0.14522	-3.0393	SI:CH211-127I16.2	probable flavin-containing monoamine oxidase a
s2f_0144908001	-0.88453	2.8538	-2.8246	0.010883	0.14534	-3.0415	s2f_0144908001	chondroitin proteoglycan 1-like
s2f_0000420004	-0.65983	5.4218	-2.8242	0.010894	0.14534	-3.0425	SI:DKEY-106N21.1	solute carrier family 23 member 2-like
s2f_0112862001	0.98573	-0.040239	2.8199	0.010996	0.1465	-3.051	s2f_0112862001	cell surface glycoprotein 1-like
s2f_0000890013	-0.54547	3.5636	-2.8189	0.01102	0.14665	-3.0531	s2f_0000890013	(genbank) hypothetical protein
s2f_0039281001	1.5927	-1.9618	2.8167	0.011073	0.14717	-3.0575	s2f_0039281001	basic salivary proline-rich protein 1-like
s2f_0002488005	0.7902	2.793	2.8159	0.011091	0.14722	-3.059	BM10337	cyclin-dependent kinase inhibitor 1
s2f_0005766002	-0.82443	1.5088	-2.8152	0.011109	0.14727	-3.0605	BM1691	dnaj homolog subfamily c member 25 homolog
s2f_0000007042	2.1219	0.60348	2.813	0.011163	0.14781	-3.065	BDH2	3-hydroxybutyrate dehydrogenase type 2
s2f_0000016158	0.5084	3.4598	2.8096	0.011244	0.14869	-3.0717	s2f_0000016158	uncharacterized loc107339678
s2f_0144523001	1.1567	-0.76649	2.8085	0.011273	0.14888	-3.074	s2f_0144523001	uncharacterized protein loc113802824 isoform x1
s2f_0381581001	0.58303	2.3238	2.8004	0.011473	0.15134	-3.0904	s2f_0381581001	uncharacterized protein loc121863107
s2f_0200552001	-0.53954	2.9801	-2.7992	0.011502	0.15154	-3.0927	s2f_0200552001	uncharacterized protein loc121868785
s2f_0381335001	-1.3485	-2.9591	-2.7985	0.01152	0.15156	-3.0941	s2f_0381335001	neurogenic locus notch homolog protein 1-like
s2f_0383208001	1.5389	-0.26259	2.798	0.011533	0.15156	-3.0951	s2f_0383208001	uncharacterized protein loc121876927
s2f_0000253011	-0.93626	0.77159	-2.7971	0.011555	0.15166	-3.0969	SLC7A14	probable cationic amino acid transporter
s2f_0000193008	0.63388	2.9559	2.7934	0.011649	0.15271	-3.1044	BMA-SLC-25A10	mitochondrial dicarboxylate carrier
s2f_0001128001	0.77927	-0.56355	2.7926	0.011668	0.15276	-3.1059	VWA5A	von willebrand factor a domain-containing protein 5a-like
s2f_0000314004	0.81324	3.0912	2.7921	0.011682	0.15276	-3.107	FZ4	frizzled-4
s2f_0382351001	1.1147	-3.5709	2.7895	0.011747	0.15335	-3.1122	s2f_0382351001	uncharacterized protein loc121869393
s2f_0380782001	1.5482	-3.3858	2.7892	0.011756	0.15335	-3.1128	s2f_0380782001	uncharacterized protein loc121856594
s2f_0000136047	-1.1546	0.16207	-2.7872	0.011805	0.15367	-3.1167	s2f_0000136047	zinc finger bed domain-containing protein 1-like
s2f_0030074001	-0.58513	2.9346	-2.7871	0.01181	0.15367	-3.1171	AGABI1DRAFT_132191	hypothetical protein
s2f_0048862001	0.46689	2.9683	2.7801	0.011991	0.15583	-3.1311	s2f_0048862001	uncharacterized protein loc108667524
s2f_0383429001	-1.2664	-2.7573	-2.7783	0.012035	0.15622	-3.1345	s2f_0383429001	mucin-1-like
s2f_0000027002	-0.73806	1.7157	-2.777	0.012069	0.15647	-3.1372	AN03G05860	hypothetical protein
s2f_0000635013	2.0757	4.057	2.7739	0.012153	0.15725	-3.1435	CG42397	peritrophin-1-like
s2f_0112802001	1.0728	-3.623	2.7736	0.012159	0.15725	-3.144	s2f_0112802001	pro-resilin-like
s2f_0000129020	0.94923	1.9819	2.7719	0.012206	0.15766	-3.1475	GNA15	guanine nucleotide-binding protein subunit alpha-11-like
s2f_0008530001	0.48524	8.0349	2.7709	0.01223	0.15778	-3.1494	CPPED1	serine/threonine-protein phosphatase cpped1-like
s2f_0000320005	-0.67623	2.9104	-2.7694	0.012272	0.15813	-3.1525	PHF14	phd finger protein 14 isoform x1
s2f_0382129001	1.845	-0.76296	2.7688	0.012288	0.15814	-3.1537	s2f_0382129001	uncharacterized protein loc121867473
s2f_0000516011	1.4108	1.4496	2.7668	0.01234	0.15861	-3.1576	FTDC1, GM1781, GM813	soma ferritin-like
s2f_0383022001	1.713	-2.8681	2.7659	0.012363	0.15865	-3.1594	s2f_0383022001	uncharacterized protein loc121875450
s2f_0006956001	-0.39859	4.0239	-2.7652	0.012384	0.15865	-3.1609	REX1BD	required for excision 1-b domain-containing protein
s2f_0017526001	0.4933	2.3466	2.7649	0.012391	0.15865	-3.1615	s2f_0017526001	(genbank) hypothetical protein
s2f_0144940001	1.6045	-3.2828	2.764	0.012415	0.15865	-3.1632	s2f_0144940001	leukocyte elastase inhibitor c-like
s2f_0007311003	0.57238	5.404	2.7639	0.012417	0.15865	-3.1634	s2f_0007311003	lysozyme-like
s2f_0000651012	-0.8276	3.1597	-2.7566	0.012616	0.16099	-3.178	SLC24A2	sodium/potassium/calcium exchanger nckx30c isoform x1
s2f_0006236001	-0.76353	1.8821	-2.7538	0.012693	0.16178	-3.1836	AGABI1DRAFT_67168	s-phase kinase-associated protein 2
s2f_0386085001	-1.367	-3.7319	-2.7514	0.012759	0.16242	-3.1884	s2f_0386085001	probable chemoreceptor glutamine deamidase ched 1
s2f_0000108001	0.72819	1.2167	2.7444	0.012954	0.16437	-3.2024	CBR-UGT-58	hypothetical protein
s2f_0383446001	-1.8465	-3.4971	-2.744	0.012965	0.16437	-3.2032	s2f_0383446001	uncharacterized protein loc121879110
s2f_0003329002	0.67197	4.5951	2.7438	0.01297	0.16437	-3.2036	QPCT	glutaminyl-peptide cyclotransferase-like
s2f_0007326002	-0.50447	2.9353	-2.7437	0.012974	0.16437	-3.2039	BM3711	letm1 domain-containing protein 1
s2f_0001741002	-0.47889	6.6695	-2.7425	0.013006	0.16459	-3.2062	PGM1	phosphoglucomutase
s2f_0004280003	-1.3549	-2.6184	-2.7419	0.013025	0.16462	-3.2075	LRRC52	leucine-rich repeat-containing protein 52
s2f_0015479001	-1.144	1.1201	-2.7398	0.013082	0.16492	-3.2115	s2f_0015479001	larval cuticle protein 16/17-like
s2f_0000325007	0.72901	5.109	2.7394	0.013093	0.16492	-3.2123	CYB5R2	nadh-cytochrome b5 reductase 2
s2f_0000734008	0.98058	3.0136	2.7391	0.013103	0.16492	-3.213	S1	maltase a3-like
s2f_0382087001	1.7929	-1.5593	2.7388	0.013111	0.16492	-3.2135	s2f_0382087001	anther-specific proline-rich protein apg-like
s2f_0200359001	-1.3537	0.31019	-2.7359	0.013195	0.16554	-3.2194	s2f_0200359001	glycine-rich protein 5-like
s2f_0000668002	0.90626	4.2693	2.7355	0.013206	0.16554	-3.2202	ATP13A3	probable cation-transporting atpase 13a3
s2f_0112894001	0.73952	1.7452	2.7354	0.013207	0.16554	-3.2203	s2f_0112894001	uncharacterized protein loc113817251
s2f_0380427001	1.1956	-3.6288	2.7336	0.013258	0.16599	-3.2238	s2f_0380427001	serine-rich adhesin for platelets-like
s2f_0000414005	0.60855	7.7125	2.7313	0.013325	0.16663	-3.2285	AVIL	villin-like protein quail isoform x1
s2f_0019038001	0.46627	5.6739	2.7298	0.013369	0.16698	-3.2315	FRAT1	gsk-3-binding protein-like
s2f_0063381001	1.4143	-2.2361	2.7247	0.013515	0.1686	-3.2415	s2f_0063381001	(genbank) hypothetical protein
s2f_0000158004	-0.73723	3.03	-2.7219	0.013597	0.16943	-3.2471	ZGC:101569	probable enoyl-coa hydratase
s2f_0144614001	2.0916	-2.0529	2.7212	0.01362	0.16951	-3.2486	s2f_0144614001	uncharacterized protein loc113806821
s2f_0200499001	1.284	-2.6739	2.7203	0.013646	0.16954	-3.2504	s2f_0200499001	uncharacterized protein loc121865347
s2f_0069890001	0.53824	2.97	2.72	0.013655	0.16954	-3.251	s2f_0069890001	(genbank) hypothetical protein
s2f_0093768001	1.8715	-2.1599	2.715	0.013801	0.17097	-3.2608	s2f_0093768001	uncharacterized protein loc113818285
s2f_0001850001	0.6507	7.643	2.715	0.013801	0.17097	-3.2608	CHS1, PXCHS1B	chitin synthase chs-2 isoform x1
s2f_0004696001	0.67951	3.085	2.7068	0.014049	0.17383	-3.2772	RGP1	rab6a-gef complex partner protein 2
s2f_0048482001	0.45507	6.3566	2.7053	0.014092	0.174	-3.28	s2f_0048482001	oxysterols receptor lxr-beta-like
s2f_0200454001	2.0423	-0.93791	2.7052	0.014096	0.174	-3.2803	s2f_0200454001	uncharacterized protein loc113811772
s2f_0042010001	0.47829	4.2459	2.7034	0.014153	0.17449	-3.284	s2f_0042010001	actin cytoskeleton-regulatory complex protein sla1
s2f_0381993001	1.7012	0.082497	2.7028	0.014168	0.17449	-3.285	s2f_0381993001	uncharacterized protein loc121866478 isoform x1
s2f_0112917001	-0.44223	2.645	-2.7001	0.014252	0.17512	-3.2904	s2f_0112917001	rna-binding protein fus-like
s2f_0144688001	0.6938	2.7049	2.7	0.014254	0.17512	-3.2905	s2f_0144688001	uncharacterized protein loc113830142
s2f_0003962004	0.56808	5.6716	2.6995	0.014269	0.17512	-3.2915	SPS1	selenide, water dikinase
s2f_0096263001	2.0943	-1.9966	2.6977	0.014327	0.17562	-3.2952	s2f_0096263001	uncharacterized protein loc113802702
s2f_0001701001	-0.6527	3.1756	-2.6961	0.014375	0.17578	-3.2983	CG5895	pi-plc x domain-containing protein 1-like
s2f_0001480001	-0.43865	2.1719	-2.6953	0.014401	0.17578	-3.2999	TBH	tyramine beta-hydroxylase
s2f_0380753001	0.6529	0.5927	2.6944	0.014428	0.17578	-3.3017	s2f_0380753001	uncharacterized protein loc121856353 isoform x1
s2f_0382824001	1.5049	1.742	2.6939	0.014442	0.17578	-3.3026	s2f_0382824001	uncharacterized protein loc121873675
s2f_0004860002	-1.4671	-1.8703	-2.6937	0.014448	0.17578	-3.303	ERBIN	erbin isoform x1
s2f_0058335001	-1.1838	-3.8344	-2.6936	0.014451	0.17578	-3.3032	s2f_0058335001	uncharacterized protein loc113802042
s2f_0014359001	-0.7329	1.1305	-2.6931	0.014467	0.17578	-3.3042	CG13579	trace amine-associated receptor 9
s2f_0002608001	0.43871	6.4169	2.693	0.014473	0.17578	-3.3045	ATG9	autophagy-related protein 9a
s2f_0002552005	-1.4899	-3.6097	-2.6912	0.014529	0.17626	-3.3081	DSIM_GD20181	serine/threonine-protein kinase d3
s2f_0005719003	-0.42254	3.1776	-2.6904	0.014554	0.17636	-3.3097	s2f_0005719003	ankyrin repeat and socs box protein 1-like
s2f_0093696001	-1.0384	7.888	-2.6851	0.014721	0.17818	-3.3201	s2f_0093696001	bromodomain-containing protein 4a-like
s2f_0383494001	1.0827	1.6159	2.679	0.014914	0.18031	-3.3321	s2f_0383494001	uncharacterized protein loc121879471
s2f_0001813004	0.98836	3.3715	2.6784	0.014931	0.18032	-3.3332	ABHD4	protein abhd4 isoform x1
s2f_0007402001	0.53213	4.9076	2.6777	0.014956	0.18041	-3.3347	BM4924	leucine-rich repeat-containing protein 20 isoform x1
s2f_0000854003	-1.0449	2.3389	-2.6691	0.015235	0.18357	-3.3517	DSIM_GD21384	dedicator of cytokinesis protein 3 isoform x1
s2f_0000001168	0.58778	4.5583	2.668	0.01527	0.18378	-3.3538	CG31266	chymotrypsin-2
s2f_0000007040	0.48126	5.5173	2.6641	0.015396	0.18509	-3.3614	ECR1	peroxisomal trans-2-enoyl-coa reductase-like
s2f_0113262001	0.73798	0.81933	2.6633	0.015426	0.18515	-3.3631	s2f_0113262001	ataxin-2 homolog
s2f_0000422002	0.76631	5.989	2.6629	0.015436	0.18515	-3.3638	s2f_0000422002	low quality protein: uncharacterized protein loc108682922
s2f_0382080001	1.2057	3.2219	2.662	0.015469	0.18533	-3.3657	s2f_0382080001	uncharacterized protein loc121867046 isoform x1
s2f_0144659001	0.53773	4.5175	2.6598	0.01554	0.18597	-3.3699	s2f_0144659001	uncharacterized protein loc113825997
s2f_0002384001	0.71856	5.9195	2.658	0.0156	0.18648	-3.3734	s2f_0002384001	calcium-activated chloride channel regulator 1-like
s2f_0001875005	0.61364	4.1365	2.6568	0.01564	0.18675	-3.3758	146.T00007	hypothetical protein
s2f_0012663001	0.57726	5.0436	2.6402	0.016207	0.1933	-3.4085	BMA-OLRN-1	hypothetical protein
s2f_0001587003	0.82491	2.1077	2.6391	0.016246	0.19351	-3.4107	ACER1	alkaline ceramidase 1
s2f_0001784004	-0.61601	2.145	-2.6386	0.016261	0.19351	-3.4115	CG12237	pyridoxal phosphate phosphatase phospho2-like
s2f_0004066001	0.59688	4.5586	2.638	0.016282	0.19354	-3.4127	CLN7	major facilitator superfamily domain-containing protein 8
s2f_0382834001	-1.687	-2.614	-2.6373	0.016309	0.19362	-3.4142	s2f_0382834001	leucine-rich repeat extensin-like protein 5
s2f_0380637001	-1.083	-0.3128	-2.6368	0.016326	0.19362	-3.4151	s2f_0380637001	short stature homeobox protein 2-like
s2f_0001348003	0.50451	5.7001	2.6362	0.016344	0.19362	-3.4162	HEM1	5-aminolevulinate synthase, erythroid-specific, mitochondrial
s2f_0112870001	-0.56329	3.6133	-2.6357	0.016364	0.19364	-3.4173	s2f_0112870001	oocyte zinc finger protein xlcof6-like
s2f_0000874005	-0.44723	3.7174	-2.6343	0.016413	0.19381	-3.42	RTEL1	regulator of telomere elongation helicase 1
s2f_0002689013	0.41617	8.4414	2.6342	0.016415	0.19381	-3.4202	SPH90	phenoloxidase-activating factor 2-like
s2f_0144697001	0.53875	2.8273	2.6305	0.016546	0.19514	-3.4274	s2f_0144697001	uncharacterized protein loc113822101
s2f_0000018038	-0.71334	11.854	-2.628	0.016636	0.19598	-3.4324	MLC1	myosin light chain alkali isoform x1
s2f_0009967001	0.83135	1.2784	2.6271	0.016667	0.19613	-3.4341	s2f_0009967001	crustacean hyperglycemic hormone-like
s2f_0033503001	0.75536	1.765	2.6264	0.016693	0.19622	-3.4355	s2f_0033503001	uncharacterized protein loc113800803
s2f_0015436001	-0.7722	1.1799	-2.6227	0.016825	0.1974	-3.4427	CG32816	(genbank) uncharacterized protein
s2f_0019197001	-0.56609	2.0127	-2.6225	0.016831	0.1974	-3.4431	s2f_0019197001	bmp and activin membrane-bound inhibitor homolog
s2f_0005952002	-0.4116	3.2424	-2.6216	0.016865	0.19758	-3.4449	EDC3	enhancer of mrna-decapping protein 3
s2f_0006919002	0.52453	5.3104	2.6192	0.01695	0.19835	-3.4495	BM4708	histone parylation factor 1-like
s2f_0038599001	0.93147	-3.6867	2.6176	0.017009	0.1987	-3.4527	s2f_0038599001	(genbank) putative cuticle protein cph35
s2f_0006968001	-0.42417	3.9648	-2.6172	0.017023	0.1987	-3.4535	DILA	centrosomal protein of 131 kda
s2f_0000092018	0.61938	8.736	2.6168	0.017036	0.1987	-3.4542	DSIM_GD25727	sulfotransferase 1c4-like
s2f_0382127001	2.0114	-1.6219	2.6136	0.017153	0.19985	-3.4604	s2f_0382127001	uncharacterized protein loc121867452
s2f_0000181004	-0.57808	3.3288	-2.6104	0.017272	0.20102	-3.4668	LIPE	hormone-sensitive lipase isoform x1
s2f_0000383011	0.48324	6.7332	2.6088	0.017331	0.20127	-3.4699	FLD1	alcohol dehydrogenase class-3
s2f_0000441010	0.44569	9.2925	2.6087	0.017332	0.20127	-3.4699	PDIA2	protein disulfide-isomerase a2
s2f_0006412002	0.56426	1.8978	2.5979	0.017737	0.20574	-3.491	CG32486	cysteine and histidine-rich protein 1 homolog
s2f_0005389001	-0.4037	3.6707	-2.5959	0.017814	0.20637	-3.495	DSIM_GD27278	tectonic-3-like
s2f_0007793001	-0.55053	1.7773	-2.5948	0.017854	0.20637	-3.4971	CG42374	soss complex subunit c homolog
s2f_0009800001	0.7222	4.249	2.5944	0.017868	0.20637	-3.4978	ZBTB11	zinc finger and btb domain-containing protein 11
s2f_0000011012	-0.36767	5.3064	-2.5937	0.017897	0.20637	-3.4993	SI:DKEY-240H12.4	death-associated protein kinase 2-like
s2f_0004982004	0.63424	3.8372	2.5931	0.017921	0.20637	-3.5005	BANK1	phosphoinositide 3-kinase adapter protein 1 isoform x1
s2f_0003055004	-0.69861	5.5924	-2.593	0.017925	0.20637	-3.5007	PC000806.01.0	protein msta-like
s2f_0020016001	1.6015	-2.8327	2.5929	0.017928	0.20637	-3.5008	MAN5A	mannan endo-1,4-beta-mannosidase-like
s2f_0044506001	1.8237	-1.9833	2.5923	0.01795	0.2064	-3.502	s2f_0044506001	hypothetical protein
s2f_0003076004	-0.55549	3.596	-2.5902	0.018031	0.20692	-3.5061	s2f_0003076004	ras-specific guanine nucleotide-releasing factor 2-like
s2f_0030878001	1.643	-1.98	2.5901	0.018034	0.20692	-3.5062	NEUTE1DRAFT_33512	hypothetical protein
s2f_0002532002	0.48399	2.8174	2.589	0.018076	0.20713	-3.5084	DSIM_GD28308	rab11 family-interacting protein 2
s2f_0381827001	-1.3695	-1.2538	-2.5885	0.018098	0.20713	-3.5095	s2f_0381827001	uncharacterized protein loc121865388
s2f_0200418001	0.66664	1.8264	2.5879	0.018118	0.20713	-3.5105	s2f_0200418001	uncharacterized protein loc113799901
s2f_0004977003	-0.79439	1.0215	-2.5876	0.01813	0.20713	-3.5111	DSIM_GD10421	putative homeodomain transcription factor
s2f_0000597007	-0.41757	5.4992	-2.5859	0.018196	0.20766	-3.5144	PABPN1	polyadenylate-binding protein 2 isoform x1
s2f_0000176005	-0.67664	1.5363	-2.5843	0.01826	0.20816	-3.5176	HSF	heat shock factor protein-like isoform x1
s2f_0019128001	0.44921	5.5312	2.5829	0.018312	0.20841	-3.5202	BTR, BTS, CAD, CADHERIN	cadherin-23-like
s2f_0000759008	-0.50087	2.0634	-2.5827	0.018321	0.20841	-3.5207	CGRRF1	cell growth regulator with ring finger domain protein 1
s2f_0006472001	-0.49331	2.0214	-2.5815	0.018369	0.20873	-3.523	WDR92	wd repeat-containing protein 92
s2f_0000922002	2.7457	1.3264	2.5795	0.018447	0.20939	-3.5269	SPINK7	serine protease inhibitor kazal-type 7
s2f_0003305002	-0.35132	5.1491	-2.5779	0.01851	0.2097	-3.53	MARS	methionine--trna ligase, cytoplasmic
s2f_0000769006	0.43205	4.8333	2.5778	0.018514	0.2097	-3.5302	BMA-ISTR-1	ist1 homolog
s2f_0005216002	-0.38987	2.7662	-2.5752	0.018614	0.21061	-3.5352	3.T00042	ddb1- and cul4-associated factor 12
s2f_0034470001	-0.40114	2.7668	-2.5741	0.01866	0.21062	-3.5374	s2f_0034470001	zinc finger y-chromosomal protein 1-like
s2f_0383221001	1.4732	-3.4577	2.5739	0.018666	0.21062	-3.5377	s2f_0383221001	uncharacterized protein loc121877011
s2f_0003418002	0.94103	3.6599	2.5737	0.018675	0.21062	-3.5381	ARFGAP-9	arf-gap with dual ph domain-containing protein 1-like
s2f_0000384006	-0.79129	2.5985	-2.5709	0.018785	0.21164	-3.5435	NOS2	nitric oxide synthase, inducible
s2f_0000153005	-0.6068	5.9311	-2.5673	0.018927	0.21289	-3.5504	MCM5	dna replication licensing factor mcm5
s2f_0113091001	0.75095	3.1023	2.567	0.018941	0.21289	-3.5511	s2f_0113091001	uncharacterized protein loc108665126
s2f_0200519001	-1.4479	-3.7898	-2.5666	0.018957	0.21289	-3.5518	s2f_0200519001	uncharacterized protein loc121866785
s2f_0382336001	-1.1777	-2.6757	-2.5624	0.019127	0.21457	-3.56	s2f_0382336001	aggrecan core protein-like
s2f_0001237001	0.97564	6.369	2.56	0.019226	0.21546	-3.5647	NPC1L1	npc1-like intracellular cholesterol transporter 1
s2f_0000329002	0.39398	7.2005	2.5589	0.019271	0.21573	-3.5668	YMC1	hypothetical protein
s2f_0003769002	-0.65842	4.0188	-2.5556	0.019405	0.21679	-3.5732	CG41284	(genbank) conserved hypothetical protein
s2f_0002118004	-0.73717	6.0795	-2.5552	0.019421	0.21679	-3.5739	PQLC3	pq-loop repeat-containing protein 3
s2f_0093824001	1.274	-1.7844	2.5551	0.019427	0.21679	-3.5742	LRR-2	oplophorus-luciferin 2-monooxygenase non-catalytic subunit-like
s2f_0380396001	-1.4479	-3.7898	-2.5542	0.019464	0.21698	-3.5759	s2f_0380396001	uncharacterized protein loc121853501
s2f_0010388001	-0.5645	3.0852	-2.5524	0.019536	0.21755	-3.5793	DSIM_GD22654	hypothetical protein
s2f_0112830001	1.0728	-3.7064	2.5508	0.019602	0.21792	-3.5823	s2f_0112830001	cyclin-k-like
s2f_0381540001	1.1147	-3.7956	2.5506	0.01961	0.21792	-3.5827	s2f_0381540001	glycine-rich cell wall structural protein 1.8-like
s2f_0066710001	0.60408	0.68748	2.5496	0.019654	0.21817	-3.5848	s2f_0066710001	phosphatidylinositol 3-kinase regulatory subunit alpha-like
s2f_0090536001	0.95043	1.0659	2.5471	0.019758	0.2191	-3.5896	s2f_0090536001	homeobox protein hmx-like
s2f_0000250007	-1.0496	1.718	-2.5414	0.019997	0.22141	-3.6005	DGKH	diacylglycerol kinase eta isoform x1
s2f_0005301001	-0.48166	4.6678	-2.5411	0.020008	0.22141	-3.601	BM10270	rna polymerase ii subunit 5-mediating protein homolog
s2f_0012879001	-0.50204	5.0243	-2.5391	0.020096	0.22215	-3.605	DSIM_GD11556	resistance to inhibitors of cholinesterase protein 3-like
s2f_0144882001	1.5969	-1.8384	2.5354	0.020254	0.22366	-3.6122	s2f_0144882001	uncharacterized protein loc113810921
s2f_0380406001	0.63381	2.1138	2.5345	0.02029	0.22382	-3.6138	s2f_0380406001	dormancy-associated protein 2-like isoform x1
s2f_0380852001	0.61241	2.1888	2.5319	0.0204	0.22481	-3.6187	s2f_0380852001	bublin coiled-coil protein-like
s2f_0000039025	0.56383	2.255	2.5304	0.020466	0.22518	-3.6217	RASEF	ras and ef-hand domain-containing protein
s2f_0006087001	0.73078	3.7709	2.5298	0.020492	0.22518	-3.6228	s2f_0006087001	transcription cofactor vestigial-like protein 4 isoform x1
s2f_0000104002	0.60449	3.0977	2.5295	0.020504	0.22518	-3.6234	SLC15A2	solute carrier family 15 member 1
s2f_0006119006	-1.0784	1.6119	-2.5292	0.020519	0.22518	-3.624	s2f_0006119006	hypothetical protein
s2f_0005170002	-0.63607	4.822	-2.5284	0.020553	0.22532	-3.6255	PAN2	hypothetical protein
s2f_0002468002	-0.53718	5.3643	-2.525	0.020701	0.2267	-3.632	AHSA	activator of 90 kda heat shock protein atpase homolog 1
s2f_0004827001	0.62812	6.4528	2.5233	0.020778	0.22731	-3.6354	DPYD	dihydropyrimidine dehydrogenase [nadp(+)]
s2f_0144707001	0.86078	2.0657	2.5218	0.020841	0.22776	-3.6382	s2f_0144707001	uncharacterized protein loc113827224 isoform x1
s2f_0000908002	0.60556	4.1362	2.5189	0.02097	0.22894	-3.6438	LPCAT3	lysophospholipid acyltransferase 5
s2f_0005044003	0.42064	2.4873	2.5167	0.021069	0.22978	-3.6481	VKOR	vitamin k epoxide reductase complex subunit 1-like protein 1
s2f_0003870003	0.43639	6.083	2.5155	0.02112	0.2301	-3.6503	BMA-VHA-17	v-type proton atpase subunit e 2-like
s2f_0001851003	-0.55801	3.0487	-2.5134	0.021213	0.23088	-3.6543	BMA-CCA-1	voltage-dependent t-type calcium channel subunit alpha-1g isoform x1
s2f_0383371001	-0.54503	4.7845	-2.5096	0.021383	0.23238	-3.6615	s2f_0383371001	histidine-rich glycoprotein-like
s2f_0200629001	1.3149	-3.2319	2.5094	0.021395	0.23238	-3.662	s2f_0200629001	uncharacterized protein loc121876797
s2f_0000742007	0.67664	4.4898	2.5062	0.021539	0.2337	-3.6682	CG11162	fatty acid hydroxylase domain-containing protein 2-like
s2f_0001541006	-0.43403	4.7594	-2.5045	0.021615	0.23422	-3.6713	POLO	serine/threonine-protein kinase polo
s2f_0000014030	0.46024	4.6407	2.5042	0.021631	0.23422	-3.672	MYO1E	unconventional myosin-if
s2f_0000000005	-1.022	-2.878	-2.5012	0.021765	0.23543	-3.6777	CAO19.6468	(genbank) hypothetical protein
s2f_0092837001	-0.48413	2.9371	-2.4984	0.021894	0.23658	-3.683	s2f_0092837001	uncharacterized protein loc108682677 isoform x1
s2f_0001340001	-0.53274	2.6065	-2.4967	0.021973	0.2372	-3.6863	CDC6	cell division control protein 6 homolog
s2f_0010839001	-0.5834	2.4537	-2.496	0.022007	0.23733	-3.6877	CBR-CEX-1	calexcitin-2
s2f_0112792001	0.82065	3.08	2.4924	0.022172	0.23885	-3.6945	s2f_0112792001	uncharacterized protein loc113829280 isoform x1
s2f_0000291014	-0.6016	3.6797	-2.4881	0.022374	0.24054	-3.7027	HSPB9	heat shock protein 30c-like
s2f_0002735001	0.60774	2.0875	2.488	0.02238	0.24054	-3.703	BM1843	metallophosphoesterase 1-like
s2f_0002720002	-0.42211	6.7065	-2.4876	0.022396	0.24054	-3.7036	MTHFR	methylenetetrahydrofolate reductase
s2f_0008490001	-0.61747	0.9255	-2.4853	0.022507	0.24149	-3.7081	CDKN3	cyclin-dependent kinase inhibitor 3 isoform x1
s2f_0004917002	-0.45795	2.9434	-2.4841	0.022564	0.2417	-3.7104	RCO1	hypothetical protein
s2f_0112836001	1.3447	-1.5717	2.4839	0.022573	0.2417	-3.7108	s2f_0112836001	uncharacterized protein loc121857768
s2f_0017689001	-1.0483	1.3278	-2.4831	0.022609	0.24181	-3.7122	s2f_0017689001	(genbank) hypothetical protein
s2f_0000558038	-0.59639	2.3724	-2.4827	0.022629	0.24181	-3.713	s2f_0000558038	hemicentin-2-like
s2f_0000370010	-0.39812	3.0644	-2.4813	0.022695	0.24227	-3.7156	AP2S1	ap-2 complex subunit sigma
s2f_0381880001	1.4666	0.53675	2.4804	0.02274	0.2425	-3.7174	s2f_0381880001	uncharacterized protein loc121865706
s2f_0381679001	0.96202	2.6705	2.4732	0.023084	0.24592	-3.731	s2f_0381679001	uncharacterized protein loc121864065
s2f_0001371003	0.47566	5.3707	2.4695	0.023263	0.24758	-3.7381	CG8745	alanine--glyoxylate aminotransferase 2-like
s2f_0000477004	-0.70222	3.4474	-2.4674	0.023366	0.24843	-3.7421	DCR-1	endoribonuclease dcr-1
s2f_0093817001	-0.55207	3.4803	-2.465	0.023487	0.24947	-3.7468	s2f_0093817001	uncharacterized protein loc113829990
s2f_0004728001	0.61039	3.6218	2.4629	0.023587	0.25028	-3.7506	IPK1	inositol-pentakisphosphate 2-kinase-like
s2f_0200490001	1.7823	-0.61394	2.4607	0.023699	0.25117	-3.7549	s2f_0200490001	uncharacterized protein loc121864793
s2f_0014492001	-0.83576	0.057266	-2.4603	0.023718	0.25117	-3.7556	CUNH10ORF82	uncharacterized protein c10orf82 homolog
s2f_0014676001	-0.76229	0.7179	-2.4572	0.023873	0.25255	-3.7615	CG14086	transmembrane protein 72-like
s2f_0383137001	-2.1497	0.029569	-2.4491	0.02428	0.2566	-3.7768	s2f_0383137001	uncharacterized protein loc121876260
s2f_0000474001	-0.64559	4.6594	-2.4471	0.024381	0.25741	-3.7806	RAD54B	dna repair and recombination protein rad54b
s2f_0016571001	-1.3734	-2.3655	-2.4466	0.024405	0.25741	-3.7815	CG5071	(genbank) uncharacterized protein, isoform a
s2f_0382326001	1.3185	-3.2863	2.4452	0.02448	0.25794	-3.7843	s2f_0382326001	uncharacterized protein loc121869215
s2f_0002728004	0.63313	2.7986	2.4435	0.024565	0.25858	-3.7874	ACYPI52223	uncharacterized protein c18orf19 homolog a
s2f_0000044036	0.57343	7.2969	2.4417	0.024656	0.25928	-3.7908	BM10010	23 kda integral membrane protein-like
s2f_0000079002	0.69625	4.9099	2.4409	0.024698	0.25946	-3.7923	DUSP10	dual specificity protein phosphatase 10
s2f_0017464001	-0.66248	-0.15186	-2.4326	0.025132	0.26357	-3.8081	s2f_0017464001	scan domain-containing protein 3-like
s2f_0000015049	-0.66703	2.4108	-2.4324	0.025138	0.26357	-3.8083	KLHL5	kelch-like protein 5 isoform x1
s2f_0144944001	-0.54953	2.7685	-2.431	0.025214	0.2641	-3.811	s2f_0144944001	uncharacterized protein loc113819877
s2f_0007647001	0.86314	5.0743	2.4255	0.025504	0.26687	-3.8213	CFAP97	cilia- and flagella-associated protein 97-like
s2f_0000402009	-0.46454	4.1256	-2.4233	0.025621	0.26783	-3.8255	s2f_0000402009	general transcription factor ii-i repeat domain-containing protein 2a-like isoform x1
s2f_0382128001	1.7463	-0.89152	2.4215	0.025716	0.26855	-3.8288	s2f_0382128001	zinc finger cchc domain-containing protein 10-like
s2f_0000163040	-0.94563	1.8317	-2.4207	0.025759	0.26874	-3.8303	s2f_0000163040	pro-resilin-like
s2f_0002980002	0.63862	4.5103	2.4193	0.025837	0.26909	-3.8331	HSD17B4	peroxisomal multifunctional enzyme type 2
s2f_0382936001	-1.1031	1.162	-2.4192	0.025844	0.26909	-3.8333	s2f_0382936001	uncharacterized protein loc121874719
s2f_0000036034	0.65028	1.5739	2.4171	0.025956	0.27	-3.8372	21.M02911	atp-dependent rna helicase deah12, chloroplastic-like
s2f_0001902006	1.2724	1.3659	2.4146	0.026089	0.27103	-3.8418	EIP78C	ecdysone-induced protein 78c isoform x1
s2f_0000016138	-1.3746	-2.7273	-2.4143	0.026107	0.27103	-3.8425	s2f_0000016138	hypothetical protein
s2f_0144877001	1.3994	-3.1773	2.4115	0.026258	0.2721	-3.8477	s2f_0144877001	uncharacterized protein loc113814619
s2f_0112871001	0.51971	3.7732	2.4115	0.026261	0.2721	-3.8478	s2f_0112871001	uncharacterized protein loc113816290
s2f_0000183006	0.5176	5.3252	2.4079	0.026459	0.27388	-3.8545	BMA-PTP-1	tyrosine-protein phosphatase non-receptor type 4 isoform x1
s2f_0000818007	1.4679	-2.4881	2.4058	0.026569	0.27476	-3.8583	JAG2B	protein jagged-2-like isoform x1
s2f_0382329001	-0.49781	1.5694	-2.4044	0.02665	0.27532	-3.861	s2f_0382329001	polysialoglycoprotein-like
s2f_0000375005	-0.35566	7.7047	-2.4038	0.026683	0.27539	-3.8622	KPNA7	importin subunit alpha-8
s2f_0004478006	-0.61671	4.5414	-2.3995	0.02692	0.27757	-3.8702	BMA-CUTL-24	(genbank) hypothetical protein
s2f_0000230004	0.68152	2.9157	2.399	0.026952	0.27763	-3.8712	DSIM_GD18380	g protein-activated inward rectifier potassium channel 3-like isoform x1
s2f_0138291001	0.65278	1.2508	2.398	0.027005	0.2779	-3.873	s2f_0138291001	(genbank) hypothetical protein
s2f_0000677009	-0.61756	12.096	-2.3965	0.02709	0.27843	-3.8758	MLC2	myosin regulatory light chain 2
s2f_0200650001	-1.6108	-1.7087	-2.3962	0.027109	0.27843	-3.8765	s2f_0200650001	uncharacterized protein loc121878129 isoform x1
s2f_0000081022	0.38827	4.9175	2.3957	0.027136	0.27843	-3.8774	GLIPR2	golgi-associated plant pathogenesis-related protein 1-like
s2f_0000635024	0.90646	3.204	2.3952	0.027161	0.27843	-3.8782	BM14333	hypothetical protein
s2f_0219551001	1.3526	-2.822	2.3935	0.027261	0.27894	-3.8815	s2f_0219551001	cell wall protein iff7-like
s2f_0000406004	-1.2364	-0.76586	-2.3934	0.027264	0.27894	-3.8816	CG42331	chorion peroxidase-like
s2f_0021192001	-1.192	2.7966	-2.3924	0.027322	0.27926	-3.8835	s2f_0021192001	adhesive plaque matrix protein 2-like
s2f_0001166005	0.84344	5.0356	2.3918	0.027358	0.27936	-3.8847	MYCH	transcriptional regulator myc-2-like
s2f_0000250001	-0.98432	0.67192	-2.3907	0.027416	0.27958	-3.8866	CBR-DGK-3	diacylglycerol kinase 1
s2f_0090142001	-0.3766	3.7956	-2.3904	0.027432	0.27958	-3.8872	s2f_0090142001	uncharacterized protein loc105340344
s2f_0004109002	-0.33824	4.4416	-2.3865	0.027659	0.28147	-3.8946	EIF2B3	translation initiation factor eif-2b subunit gamma
s2f_0001599005	-0.51145	6.2838	-2.3863	0.02767	0.28147	-3.8949	DNMT1	dna (cytosine-5)-methyltransferase 1-like
s2f_0093718001	0.64386	4.886	2.3836	0.027827	0.28278	-3.9	s2f_0093718001	uncharacterized protein loc108683371
s2f_0144570001	-1.4961	-2.3203	-2.3826	0.027883	0.28309	-3.9019	s2f_0144570001	cell wall protein dan4-like
s2f_0058325001	-1.395	-2.9006	-2.3804	0.028011	0.28411	-3.906	s2f_0058325001	mage-like protein 2
s2f_0200394001	1.6364	-2.5098	2.3775	0.028177	0.28553	-3.9113	s2f_0200394001	filaggrin-like
s2f_0017576001	-0.6471	2.4043	-2.3748	0.028338	0.28688	-3.9164	CG15725	mucin-5ac
s2f_0382302001	-0.46728	2.6798	-2.3735	0.02841	0.28734	-3.9187	s2f_0382302001	gastrula zinc finger protein xlcgf8.2db-like
s2f_0000328015	-0.38365	4.9179	-2.3722	0.02849	0.28787	-3.9212	BMA-NEP-21	endothelin-converting enzyme 1-like
s2f_0006837001	0.68903	2.3008	2.3711	0.028554	0.28819	-3.9233	MYD88	myeloid differentiation primary response protein myd88
s2f_0382199001	-1.2442	-3.6485	-2.3704	0.028594	0.28819	-3.9245	s2f_0382199001	sialidase-like
s2f_0000375004	0.66455	3.2442	2.3702	0.028604	0.28819	-3.9248	1.T00150	hypothetical protein
s2f_0002112006	-0.49611	3.2997	-2.3676	0.028761	0.2895	-3.9298	CG30440	guanine nucleotide exchange factor dbs-like isoform x1
s2f_0000881005	-0.43294	12.117	-2.3671	0.028788	0.2895	-3.9306	FDL	chitooligosaccharidolytic beta-n-acetylglucosaminidase
s2f_0113074001	1.1211	-2.3603	2.3666	0.028822	0.28956	-3.9317	s2f_0113074001	uncharacterized protein loc113810226 isoform x1
s2f_0381786001	0.52018	5.0254	2.3658	0.028868	0.28973	-3.9331	s2f_0381786001	uncharacterized protein loc121864896
s2f_0006394001	0.37897	3.973	2.3654	0.028894	0.28973	-3.9339	CG11399	phosphorylated ctd-interacting factor 1
s2f_0000923005	-0.44107	7.0199	-2.3635	0.029004	0.29056	-3.9373	DSIM_GD10984	voltage-dependent calcium channel subunit alpha-2/delta-3 isoform x1
s2f_0113096001	1.9125	1.0589	2.3627	0.029053	0.29072	-3.9388	s2f_0113096001	uncharacterized protein loc108677394
s2f_0007173001	-0.59467	2.5383	-2.3623	0.029075	0.29072	-3.9395	CEP97	centrosomal protein of 97 kda
s2f_0002265003	-0.85554	-1.1043	-2.3613	0.029135	0.29104	-3.9414	EFCAB8	wd repeat-containing protein on y chromosome-like
s2f_0008124001	0.96117	-0.23151	2.3599	0.029224	0.29142	-3.9441	CG17258	coiled-coil domain-containing protein 191
s2f_0000604013	0.43039	6.3101	2.3598	0.02923	0.29142	-3.9443	LMPB	lysosome membrane protein 2-like
s2f_0380610001	-1.3066	-3.8344	-2.3594	0.029255	0.29142	-3.9451	s2f_0380610001	proteoglycan 4-like
s2f_0382820001	-0.57389	1.6365	-2.3556	0.029484	0.29343	-3.9521	s2f_0382820001	uncharacterized protein loc121873637
s2f_0381979001	-1.1029	-3.86	-2.3518	0.029716	0.29545	-3.9591	s2f_0381979001	histone h2a.z-specific chaperone chz1-like
s2f_0381765001	-1.0613	5.9427	-2.3504	0.029797	0.29599	-3.9616	s2f_0381765001	glycine-rich protein 5-like
s2f_0000561007	0.4657	6.2022	2.3479	0.029954	0.29707	-3.9663	CG1492	gamma-glutamyltranspeptidase 1-like
s2f_0000016088	0.41766	2.2505	2.3477	0.029967	0.29707	-3.9667	s2f_0000016088	--
s2f_0003719002	0.63037	3.9544	2.3473	0.02999	0.29707	-3.9674	AGMAT	agmatinase, mitochondrial
s2f_0000033015	0.41912	5.0722	2.3457	0.030088	0.29776	-3.9703	CDK18	cyclin-dependent kinase 17
s2f_0006621001	-0.44489	2.9301	-2.3447	0.030154	0.29813	-3.9723	ORC6	origin recognition complex subunit 6
s2f_0006375002	-0.45695	2.523	-2.3426	0.03028	0.29901	-3.9761	BM1391	e3 ubiquitin-protein ligase traip-like
s2f_0013541001	-0.45461	3.3961	-2.3423	0.0303	0.29901	-3.9766	TSL	torso-like protein
s2f_0382930001	1.3261	-1.4484	2.3404	0.030422	0.29994	-3.9802	s2f_0382930001	putative protein tprxl
s2f_0382530001	-1.3081	-2.6713	-2.3382	0.03056	0.30102	-3.9843	s2f_0382530001	uncharacterized protein loc121870890
s2f_0006778002	-1.1284	-0.21973	-2.3376	0.030596	0.30109	-3.9854	CFAP157	cilia- and flagella-associated protein 157
s2f_0071100001	0.80338	5.1566	2.3363	0.030675	0.30159	-3.9877	s2f_0071100001	anti-lipopolysaccharide factor-like
s2f_0200571001	-0.89371	0.46134	-2.3335	0.030857	0.3031	-3.993	s2f_0200571001	uncharacterized protein loc121870601
s2f_0005145004	0.48406	4.1239	2.333	0.030889	0.30313	-3.9939	BM9390	death-associated protein 1
s2f_0144610001	1.4331	-1.5944	2.3324	0.030925	0.3032	-3.995	s2f_0144610001	translation initiation factor if-2-like
s2f_0009569001	-0.66511	1.4873	-2.331	0.031017	0.30362	-3.9976	s2f_0009569001	(genbank) hypothetical protein
s2f_0001074004	-0.40817	5.7808	-2.3308	0.031025	0.30362	-3.9979	PARP	poly [adp-ribose] polymerase
s2f_0037615001	-0.84246	11.424	-2.3288	0.031151	0.30457	-4.0015	s2f_0037615001	nesprin-1-like
s2f_0382904001	1.5656	-2.257	2.3275	0.031239	0.30515	-4.004	s2f_0382904001	uncharacterized protein loc121874487
s2f_0004597001	0.55155	1.9606	2.3268	0.031282	0.30529	-4.0053	TMEM189	transmembrane protein 189
s2f_0000371010	0.69289	4.7403	2.3246	0.031424	0.30629	-4.0093	SLC25A32	mitochondrial folate transporter/carrier
s2f_0001843004	0.37527	4.6276	2.3243	0.031443	0.30629	-4.0099	CG6903	heparan-alpha-glucosaminide n-acetyltransferase-like
s2f_0000711007	-0.45388	9.0957	-2.3236	0.03149	0.30647	-4.0112	PGAM2	phosphoglycerate mutase 2
s2f_0383027001	-0.45575	5.5646	-2.3214	0.03163	0.30755	-4.0152	s2f_0383027001	flocculation protein flo11-like
s2f_0005917001	-0.3783	2.3402	-2.32	0.03172	0.30797	-4.0177	EAF7	hypothetical protein
s2f_0000169002	-1.196	-3.1774	-2.3199	0.031731	0.30797	-4.0181	TUBB	tubulin beta chain
s2f_0380663001	1.2765	-2.9608	2.3193	0.031768	0.30804	-4.0191	s2f_0380663001	protein p200-like isoform x1
s2f_0112931001	0.84153	0.15128	2.3186	0.031812	0.30815	-4.0203	s2f_0112931001	uncharacterized protein loc108680228
s2f_0001701006	1.1093	0.069047	2.3175	0.031882	0.30815	-4.0223	PLCXD1	pi-plc x domain-containing protein 3
s2f_0000126028	0.49211	2.519	2.3162	0.031967	0.30815	-4.0247	BMA-GLY-9	polypeptide n-acetylgalactosaminyltransferase 1
s2f_0008339001	0.77092	8.3164	2.316	0.03198	0.30815	-4.0251	CUNH4ORF33	upf0462 protein c4orf33 homolog
s2f_0000921003	0.37026	5.3413	2.316	0.031981	0.30815	-4.0251	DIRC2	disrupted in renal carcinoma protein 2 homolog
s2f_0112935001	-0.50563	2.4506	-2.3158	0.031994	0.30815	-4.0255	s2f_0112935001	c-type lectin domain family 4 member m-like
s2f_0006881004	-1.1774	-1.5425	-2.3157	0.032003	0.30815	-4.0257	PCLO	protein piccolo-like
s2f_0112259001	0.93147	-3.4364	2.3156	0.032012	0.30815	-4.026	s2f_0112259001	ankyrin repeat domain-containing protein 29-like
s2f_0000406002	0.35761	9.0174	2.3145	0.032081	0.30853	-4.0279	PXT	chorion peroxidase
s2f_0000178003	0.65041	4.2173	2.3141	0.032111	0.30854	-4.0287	LIP	pancreatic triacylglycerol lipase-like
s2f_0225528001	-1.1838	-3.595	-2.3131	0.032175	0.30865	-4.0305	s2f_0225528001	actin-like
s2f_0000153016	-0.52026	6.6765	-2.313	0.032181	0.30865	-4.0307	MCM3	dna replication licensing factor mcm3
s2f_0000523007	0.40228	4.7408	2.3126	0.03221	0.30865	-4.0315	IRAK1	hypothetical protein
s2f_0381960001	-1.2442	-3.6097	-2.3108	0.032324	0.30946	-4.0347	s2f_0381960001	uncharacterized protein loc121866211
s2f_0071107001	-0.81376	6.7853	-2.3103	0.032358	0.3095	-4.0356	s2f_0071107001	uncharacterized protein loc113802038
s2f_0381862001	-1.4863	-2.5678	-2.3094	0.032417	0.30979	-4.0372	s2f_0381862001	proteoglycan 4-like
s2f_0001610001	0.35966	3.4223	2.3068	0.032591	0.31077	-4.042	REV1	hypothetical protein
s2f_0034999001	1.5379	0.17939	2.3066	0.032607	0.31077	-4.0425	s2f_0034999001	hypothetical protein
s2f_0001309004	-0.36337	6.8087	-2.3064	0.032621	0.31077	-4.0428	SSE1	hypothetical protein
s2f_0000275003	-0.45406	2.0651	-2.3061	0.032637	0.31077	-4.0433	WRN	werner syndrome atp-dependent helicase isoform x1
s2f_0006279001	0.57603	1.8033	2.3053	0.032692	0.31102	-4.0448	BUFFY	bcl-2-related ovarian killer protein-like
s2f_0144733001	1.3421	-0.10952	2.3045	0.032747	0.31124	-4.0463	s2f_0144733001	leucine-rich repeat extensin-like protein 5
s2f_0002800001	-1.117	3.3212	-2.3041	0.032774	0.31124	-4.047	AGABI1DRAFT_81244	hypothetical protein
s2f_0002401004	-0.34968	4.0627	-2.3036	0.032804	0.31124	-4.0479	RFC3	replication factor c subunit 3
s2f_0005268002	0.38894	5.022	2.3017	0.032935	0.3122	-4.0514	RNF183	ring finger protein 183
s2f_0000475015	0.42222	7.2714	2.2986	0.033145	0.31391	-4.0571	CG14024	carbohydrate sulfotransferase 11-like
s2f_0380527001	-1.1289	-1.7116	-2.2968	0.033266	0.31478	-4.0604	s2f_0380527001	uncharacterized protein loc121854713
s2f_0011852001	-0.41437	7.8256	-2.2961	0.033315	0.31496	-4.0617	BLANKS	double-stranded rna-specific editase 1 isoform x1
s2f_0381626001	-1.2257	-3.7378	-2.2933	0.033508	0.3165	-4.0669	s2f_0381626001	uncharacterized protein loc121863594
s2f_0144849001	-0.91807	1.1774	-2.2907	0.033682	0.31786	-4.0715	s2f_0144849001	extensin-like
s2f_0063400001	-0.54851	1.481	-2.287	0.033936	0.31964	-4.0782	s2f_0063400001	thrombospondin type-1 domain-containing protein 7a-like isoform x1
s2f_0001598001	-0.54968	1.8445	-2.2867	0.033958	0.31964	-4.0788	BM6738	hypothetical protein
s2f_0000079010	1.4002	2.4315	2.2863	0.033986	0.31964	-4.0795	DSIM_GD12305	dual specificity protein phosphatase mpk3
s2f_0003567001	-0.34826	4.3493	-2.2862	0.033992	0.31964	-4.0797	UBP1	hypothetical protein
s2f_0113214001	-1.1838	-3.8732	-2.2843	0.034124	0.3206	-4.0831	s2f_0113214001	probable atp-dependent helicase hi_0387
s2f_0000539008	0.53588	2.9744	2.281	0.034354	0.32222	-4.0892	AGABI1DRAFT_40399	hypothetical protein
s2f_0093746001	-1.4294	-3.5175	-2.281	0.034357	0.32222	-4.0892	s2f_0093746001	keratin, type i cytoskeletal 10-like
s2f_0005022001	1.4578	-1.5253	2.2799	0.034435	0.32267	-4.0913	MDM35	hypothetical protein
s2f_0383572001	-0.56978	0.48857	-2.278	0.034565	0.3236	-4.0946	s2f_0383572001	altered inheritance of mitochondria protein 44-like
s2f_0000084037	0.35664	4.2769	2.2775	0.034604	0.32368	-4.0956	BMA-NGN-1	helix-loop-helix protein delilah-like
s2f_0381405001	0.95015	-0.51097	2.2766	0.034664	0.32395	-4.0972	s2f_0381405001	uncharacterized protein loc121861719
s2f_0075085001	1.2024	0.22497	2.2747	0.034798	0.32492	-4.1006	s2f_0075085001	uncharacterized protein loc109462600
s2f_0000167017	1.3321	5.0398	2.2727	0.034942	0.32572	-4.1043	ABCA3	atp-binding cassette sub-family a member 3-like
s2f_0001806001	-0.63355	1.3724	-2.2726	0.034949	0.32572	-4.1045	GSP1	hypothetical protein
s2f_0144527001	-0.66059	1.6079	-2.2722	0.034977	0.32572	-4.1052	s2f_0144527001	myoneurin-like
s2f_0001202005	0.39681	5.6822	2.2692	0.035194	0.32736	-4.1107	SLMO	protein slowmo
s2f_0200501001	1.1719	1.1262	2.2687	0.035229	0.32736	-4.1116	s2f_0200501001	uncharacterized protein loc121865515
s2f_0007244002	-0.72989	0.55562	-2.2679	0.035288	0.32736	-4.1131	BMA-NDX-1	8-oxo-dgdp phosphatase nudt18
s2f_0000006015	0.44152	2.0536	2.2677	0.035303	0.32736	-4.1135	KIFC2	hypothetical protein
s2f_0113106001	-0.62919	3.4852	-2.2676	0.035308	0.32736	-4.1136	s2f_0113106001	uncharacterized protein loc108682739 isoform x1
s2f_0009019002	1.2381	0.65743	2.2672	0.035338	0.32736	-4.1144	s2f_0009019002	hypothetical protein
s2f_0144586001	0.68627	1.1932	2.2642	0.035551	0.32904	-4.1198	s2f_0144586001	uncharacterized protein loc113822554
s2f_0000028034	-0.5227	4.4203	-2.2633	0.03562	0.32939	-4.1215	REPO	homeobox protein arx-like
s2f_0002066001	0.38878	6.8811	2.2611	0.035779	0.33033	-4.1255	FRYL	protein furry homolog-like isoform x1
s2f_0483771001	1.6031	-2.0388	2.2609	0.035793	0.33033	-4.1258	s2f_0483771001	flocculation protein flo11-like isoform x1
s2f_0001128008	1.2441	-0.46514	2.2606	0.035815	0.33033	-4.1264	503.T00004	hypothetical protein
s2f_0383213001	0.83639	2.7153	2.2599	0.035867	0.33052	-4.1276	s2f_0383213001	uncharacterized protein loc121876967
s2f_0144551001	1.1938	2.7315	2.2592	0.035914	0.33067	-4.1288	s2f_0144551001	uncharacterized protein loc113807823
s2f_0005451001	-0.69622	0.41116	-2.2586	0.035961	0.33081	-4.13	BM10884	transmembrane protein 272-like
s2f_0093828001	-1.2876	-0.14891	-2.2575	0.036038	0.33123	-4.1319	s2f_0093828001	leucine-rich repeat extensin-like protein 3
s2f_0005479002	-0.44638	1.8595	-2.2566	0.036109	0.33148	-4.1337	MBTPS2	membrane-bound transcription factor site-2 protease
s2f_0381106001	-1.2257	-2.9476	-2.2563	0.036127	0.33148	-4.1341	s2f_0381106001	coiled-coil domain-containing protein 146-like
s2f_0037696001	-0.88051	1.3515	-2.2543	0.036277	0.33256	-4.1378	s2f_0037696001	eyes absent homolog 1-like
s2f_0144848001	-0.64974	5.0812	-2.2537	0.036317	0.33258	-4.1388	s2f_0144848001	uncharacterized protein loc113813062
s2f_0001995001	-0.4009	2.1241	-2.2534	0.036343	0.33258	-4.1394	SI:CH211-137A8.2	nesprin-2-like
s2f_0007762002	-0.56934	2.6988	-2.253	0.036374	0.33258	-4.1402	CUEDC2	cue domain-containing protein 2
s2f_0383100001	1.645	-2.1993	2.252	0.036446	0.33296	-4.1419	s2f_0383100001	basic salivary proline-rich protein 4-like
s2f_0003693001	-0.38593	3.6228	-2.2513	0.036494	0.33311	-4.1431	OMA1	metalloendopeptidase oma1, mitochondrial-like
s2f_0001234001	-1.0177	0.17764	-2.2507	0.036541	0.33325	-4.1442	DSIM_GD13531	transient receptor potential channel pyrexia
s2f_0015123001	0.68933	2.1687	2.248	0.036745	0.33482	-4.1492	CG12420	(genbank) uncharacterized protein
s2f_0112978001	0.68168	2.0045	2.2464	0.036862	0.3352	-4.152	s2f_0112978001	gamma-aminobutyric acid receptor subunit alpha-2-like isoform x1
s2f_0000478008	-0.41576	5.5842	-2.2461	0.036883	0.3352	-4.1526	CG11319	inactive dipeptidyl peptidase 10 isoform x1
s2f_0144680001	1.2607	-0.19507	2.246	0.03689	0.3352	-4.1527	s2f_0144680001	anionic trypsin-like
s2f_0003481001	0.31808	3.6703	2.2457	0.036913	0.3352	-4.1533	DSIM_GD16293	upstream stimulatory factor 2 isoform x1
s2f_0144774001	0.9537	4.8082	2.2449	0.036978	0.33549	-4.1548	s2f_0144774001	uncharacterized protein loc108671290 isoform x1
s2f_0011793001	0.62467	4.0874	2.2439	0.037048	0.33571	-4.1565	EGH	beta-1,4-mannosyltransferase egh
s2f_0200479001	-0.99128	-0.74865	-2.2437	0.037065	0.33571	-4.1569	s2f_0200479001	uncharacterized protein loc121863711 isoform x1
s2f_0002183001	-1.2315	0.35639	-2.2406	0.037301	0.33756	-4.1626	BMA-SOEM-1	hypothetical protein
s2f_0002196004	-0.39146	4.4577	-2.2388	0.037436	0.33804	-4.1658	CG3009	phospholipase a2-like
s2f_0000250008	-0.96006	-0.88806	-2.2387	0.037439	0.33804	-4.1659	DGK7	diacylglycerol kinase 7-like
s2f_0007335001	-0.37125	3.6721	-2.2382	0.037483	0.33804	-4.1669	BBS1	bardet-biedl syndrome 1 protein homolog
s2f_0000333002	0.41773	5.5052	2.2382	0.037483	0.33804	-4.1669	ALPHA--FUCOSYLTRANSFERASE	alpha-(1,3)-fucosyltransferase c-like
s2f_0382895001	-1.1056	-0.80902	-2.2378	0.037513	0.33804	-4.1676	s2f_0382895001	ataxin-8-like
s2f_0000650005	0.97681	5.9629	2.2356	0.037675	0.33921	-4.1715	DSIM_GD12726	bumetanide-sensitive sodium-(potassium)-chloride cotransporter
s2f_0000878001	-0.355	4.0586	-2.2342	0.037787	0.33993	-4.1741	HTRA2	serine protease htra2, mitochondrial
s2f_0002830002	-0.36366	4.6964	-2.2332	0.037863	0.34032	-4.1759	BMA-OTUB-1	ubiquitin thioesterase otubain-like
s2f_0113032001	0.76083	-0.35722	2.2322	0.037941	0.34073	-4.1777	s2f_0113032001	uncharacterized protein loc108669761
s2f_0000443012	0.48662	5.1994	2.2291	0.038179	0.34257	-4.1833	OS01G0124900	putative e3 ubiquitin-protein ligase sina-like 6
s2f_0005628003	-0.50301	3.1061	-2.2269	0.038346	0.34378	-4.1872	SYMBB.V1.2.016068.T1	ubiquitin carboxyl-terminal hydrolase 38-like
s2f_0000260014	-1.0695	1.3926	-2.2257	0.038436	0.3443	-4.1893	SLC4A11	sodium bicarbonate transporter-like protein 11 isoform x1
s2f_0000310013	-0.42267	2.8895	-2.2253	0.038474	0.34434	-4.1901	DIP-EPSILON	lachesin-like
s2f_0001355004	-0.40827	3.4894	-2.2234	0.038617	0.34533	-4.1934	NSUN6	putative methyltransferase nsun6
s2f_0000032008	-0.80931	1.1419	-2.2206	0.038835	0.34671	-4.1985	ARF3	adp-ribosylation factor-like
s2f_0000065014	-0.42949	3.8373	-2.2203	0.038861	0.34671	-4.199	BM2432	dehydrogenase/reductase sdr family member on chromosome x-like
s2f_0002522004	-0.3175	5.9149	-2.2202	0.038869	0.34671	-4.1992	BMA-LET-765	protein strawberry notch isoform x1
s2f_0000239017	0.85267	2.7426	2.2187	0.038987	0.34747	-4.2019	NR2F1	steroid receptor seven-up, isoforms b/c
s2f_0144636001	0.82884	3.1429	2.2182	0.039026	0.34752	-4.2028	s2f_0144636001	uncharacterized protein loc113824784
s2f_0000345006	1.1956	-3.1021	2.2171	0.039113	0.348	-4.2048	BM3495	solute carrier organic anion transporter family member 2a1-like
s2f_0000056024	-0.36781	11.557	-2.2163	0.039174	0.34825	-4.2062	HSC70-4	heat shock 70 kda protein cognate 4
s2f_0112895001	0.8029	1.3714	2.215	0.039278	0.34869	-4.2085	s2f_0112895001	uncharacterized protein loc113825042
s2f_0000084001	1.0593	-0.013367	2.2149	0.039288	0.34869	-4.2088	CG33557	transcription factor 15-like
s2f_0080104001	1.5383	1.3159	2.2072	0.039903	0.35385	-4.2226	s2f_0080104001	serine/threonine-protein kinase pakf-like
s2f_0144762001	-0.79046	6.3508	-2.2067	0.039946	0.35393	-4.2235	s2f_0144762001	class e vacuolar protein-sorting machinery protein hse1-like
s2f_0004913002	0.45256	4.8967	2.2059	0.040008	0.35413	-4.2249	CRYM	ketimine reductase mu-crystallin
s2f_0002022002	1.3028	2.1024	2.2055	0.040036	0.35413	-4.2255	BM8328	thiamine transporter 1-like
s2f_0381383001	-0.58072	6.2283	-2.2047	0.0401	0.35422	-4.2269	s2f_0381383001	low quality protein: uncharacterized transmembrane protein ddb_g0289901-like
s2f_0002168003	1.5265	-2.1026	2.2045	0.040123	0.35422	-4.2274	GBP1	ribosome-binding atpase ychf
s2f_0001529004	-0.55379	5.8259	-2.2042	0.040146	0.35422	-4.2279	DPSE_ADE3	trifunctional purine biosynthetic protein adenosine-3
s2f_0002118001	0.5071	2.4901	2.2025	0.040285	0.35515	-4.231	BM3915	mannose-p-dolichol utilization defect 1 protein homolog
s2f_0014526001	-0.64504	1.9945	-2.2008	0.04042	0.35604	-4.234	BURS	bursicon
s2f_0002503001	-0.64094	2.256	-2.1996	0.04052	0.35634	-4.2362	SGPP2	sphingosine-1-phosphate phosphatase 2
s2f_0381737001	1.136	0.14995	2.1994	0.040535	0.35634	-4.2365	s2f_0381737001	uncharacterized protein loc121864692
s2f_0000389004	0.81331	3.1593	2.1991	0.040555	0.35634	-4.2369	ACP7	acid phosphatase type 7
s2f_0380720001	1.1315	-1.6252	2.1962	0.040796	0.35761	-4.2422	s2f_0380720001	uncharacterized protein ddb_g0290301-like
s2f_0000529002	0.62707	4.3037	2.196	0.040816	0.35761	-4.2426	DPP	protein decapentaplegic-like
s2f_0117326001	-0.7469	0.0026634	-2.1958	0.04083	0.35761	-4.2429	s2f_0117326001	protein krueppel-like
s2f_0002855002	-0.75757	2.4196	-2.1957	0.040835	0.35761	-4.243	MDM1	hypothetical protein
s2f_0007574001	0.65739	4.6925	2.1938	0.040993	0.3587	-4.2465	s2f_0007574001	nlr family card domain-containing protein 4-like
s2f_0144863001	0.55528	-0.18122	2.1913	0.041203	0.36024	-4.251	s2f_0144863001	ankyrin repeat and sam domain-containing protein 6-like
s2f_0000579006	-0.29865	4.5576	-2.1905	0.041264	0.36047	-4.2523	HDAC3	histone deacetylase 3
s2f_0000015001	-0.42909	2.5933	-2.1891	0.041379	0.36118	-4.2548	SI:CH211-256E16.3	kelch-like protein 20
s2f_0001674002	-0.36593	3.7487	-2.1868	0.041574	0.36258	-4.2589	s2f_0001674002	wd repeat-containing protein 34-like
s2f_0144724001	-1.1838	-3.3588	-2.1863	0.041615	0.36264	-4.2598	s2f_0144724001	uncharacterized protein loc113811699
s2f_0000194001	0.6825	5.524	2.1856	0.041675	0.36286	-4.2611	BMA-CTG-1	sec14-like protein 2
s2f_0070676001	-0.58386	1.3615	-2.185	0.04172	0.36296	-4.2621	s2f_0070676001	putative gustatory receptor 39b
s2f_0009347004	-0.63944	3.2455	-2.182	0.041975	0.36488	-4.2674	CG7607	immunoglobulin domain-containing protein oig-4-like
s2f_0112772001	-0.34196	4.719	-2.1816	0.042011	0.36489	-4.2682	s2f_0112772001	kinesin-related protein 4-like isoform x1
s2f_0014884001	0.4717	5.7168	2.18	0.042145	0.36572	-4.271	UZIP	protein unzipped
s2f_0008379001	-1.5427	-2.3801	-2.1793	0.042208	0.36572	-4.2723	DSIM_MEI-218	mcm domain-containing protein 2-like
s2f_0144814001	-0.49561	1.4404	-2.1792	0.042211	0.36572	-4.2724	s2f_0144814001	uncharacterized protein loc113819831
s2f_0003300004	-0.46971	10.383	-2.1778	0.042329	0.36645	-4.2749	BM2092	hemicentin-1-like
s2f_0011198001	0.79663	0.33462	2.1755	0.042531	0.36775	-4.2791	CUNH1ORF53	uncharacterized protein c1orf53 homolog
s2f_0200469001	-0.63694	2.0884	-2.1752	0.042549	0.36775	-4.2795	s2f_0200469001	protein split ends-like
s2f_0000109005	0.96873	3.278	2.1702	0.042983	0.3712	-4.2885	ALDH5A1	succinate-semialdehyde dehydrogenase, mitochondrial
s2f_0004290001	-0.54584	1.742	-2.1666	0.043295	0.37359	-4.2948	CG42322	putative thiamine transporter slc35f3 isoform x1
s2f_0000357019	-0.8817	0.92917	-2.1661	0.043337	0.37365	-4.2957	ADCY8	adenylate cyclase type 8 isoform x1
s2f_0001474003	-0.31949	6.0603	-2.1654	0.0434	0.37374	-4.297	AARS	alanine--trna ligase, cytoplasmic
s2f_0003785001	0.37438	4.7106	2.1647	0.043461	0.37374	-4.2982	RTGEF	rho guanine nucleotide exchange factor 7 isoform x1
s2f_0381980001	-1.5084	-3.3084	-2.1645	0.043478	0.37374	-4.2986	s2f_0381980001	acidic leucine-rich nuclear phosphoprotein 32-related protein-like
s2f_0016567001	-0.97548	1.4431	-2.164	0.04352	0.37374	-4.2994	CTL5	(genbank) hypothetical protein
s2f_0000168007	-0.38758	8.7082	-2.1634	0.043569	0.37374	-4.3004	CG14516	aminopeptidase n-like
s2f_0006027001	-0.35954	3.8932	-2.1632	0.04359	0.37374	-4.3009	TTC17	tetratricopeptide repeat protein 17 isoform x1
s2f_0045897001	0.94153	2.5216	2.1631	0.043595	0.37374	-4.301	s2f_0045897001	uncharacterized protein loc113802134
s2f_0000109006	0.39266	7.4431	2.1623	0.043669	0.37407	-4.3025	ALDH1L2	cytosolic 10-formyltetrahydrofolate dehydrogenase
s2f_0000342012	1.1295	1.0352	2.1609	0.04379	0.37421	-4.3049	RABJ	hypothetical protein
s2f_0113052001	-0.46536	3.2591	-2.1609	0.043791	0.37421	-4.3049	s2f_0113052001	b-cell lymphoma 6 protein-like
s2f_0382771001	-1.2052	-2.4427	-2.1609	0.043792	0.37421	-4.3049	s2f_0382771001	extensin-like
s2f_0000002022	0.80465	2.2754	2.16	0.043864	0.37435	-4.3064	DLX2	homeobox protein dlx-2
s2f_0002609003	0.65125	5.5877	2.1599	0.043879	0.37435	-4.3067	BSG	basigin
s2f_0001036006	0.38141	4.3135	2.1577	0.044071	0.37536	-4.3106	CG32485	cral-trio domain-containing protein c3h8.02
s2f_0109004001	-1.4479	-3.3727	-2.1574	0.044092	0.37536	-4.311	s2f_0109004001	uncharacterized protein loc109538863
s2f_0112805001	0.3856	3.6449	2.1573	0.044103	0.37536	-4.3112	s2f_0112805001	myoneurin-like
s2f_0000512007	0.46186	2.2554	2.1567	0.044159	0.37553	-4.3123	AAT20	hypothetical protein
s2f_0000134010	0.44945	4.894	2.1552	0.044289	0.37634	-4.3149	BMA-TWK-1	two pore potassium channel protein sup-9-like
s2f_0012268001	0.65923	-0.64564	2.1539	0.044406	0.37702	-4.3172	CUNH17ORF113	transmembrane protein c17orf113 homolog
s2f_0000294020	-0.75538	11.988	-2.1535	0.044441	0.37702	-4.3179	s2f_0000294020	cuticle protein amp1a-like
s2f_0000733005	-0.36174	5.4877	-2.1527	0.044514	0.37715	-4.3194	RFC5	replication factor c subunit 5
s2f_0000429006	-0.51505	2.9831	-2.1525	0.044527	0.37715	-4.3197	ATM	hypothetical protein
s2f_0037690001	-0.90869	-0.15307	-2.151	0.04466	0.37797	-4.3223	s2f_0037690001	uncharacterized protein loc113809301
s2f_0382781001	1.3568	-1.1981	2.1496	0.044792	0.37856	-4.3249	s2f_0382781001	paraneoplastic antigen ma6e-like
s2f_0000682009	-0.5075	1.444	-2.1494	0.044802	0.37856	-4.3251	BM10635	aryl hydrocarbon receptor nuclear translocator-like protein 1
s2f_0381825001	-1.232	-2.7532	-2.1473	0.044994	0.37968	-4.3289	s2f_0381825001	protein piccolo-like
s2f_0002627001	-0.49498	3.6381	-2.1472	0.045006	0.37968	-4.3291	TAE1	hypothetical protein
s2f_0380850001	-1.1167	-0.93086	-2.1463	0.045085	0.38004	-4.3306	s2f_0380850001	uncharacterized protein loc121857140 isoform x1
s2f_0000062006	-0.68572	6.0557	-2.1456	0.045147	0.38026	-4.3319	BMA-SNF-11	sodium- and chloride-dependent gaba transporter 1-like
s2f_0001861001	-0.65926	1.2827	-2.1449	0.045206	0.38046	-4.333	DSIM_GD12647	whirlin isoform x1
s2f_0017306001	1.1225	-0.86814	2.1441	0.045284	0.38063	-4.3345	PC301779.00.0	(oist) -
s2f_0063169001	-0.71937	2.4297	-2.1439	0.045298	0.38063	-4.3348	s2f_0063169001	uncharacterized protein loc103515349
s2f_0000075015	-0.71533	8.0942	-2.1431	0.045374	0.38096	-4.3363	NACHRBETA3	acetylcholine receptor subunit alpha-like 1
s2f_0093723001	-0.28738	4.9512	-2.1404	0.045614	0.38267	-4.3409	s2f_0093723001	zinc finger protein 62 homolog
s2f_0000007004	0.4903	5.7415	2.1385	0.045791	0.38379	-4.3444	HSD17B8	estradiol 17-beta-dehydrogenase 8-like
s2f_0113073001	1.113	-0.85273	2.1382	0.04582	0.38379	-4.3449	s2f_0113073001	uncharacterized protein loc113820730 isoform x1
s2f_0006835002	-0.33472	3.866	-2.1369	0.045937	0.3843	-4.3472	DSIM_GD14406	histone deacetylase complex subunit sap130
s2f_0002130004	-0.42631	5.1932	-2.1367	0.045954	0.3843	-4.3475	BMA-SNG-1	synaptogyrin
s2f_0381291001	0.85056	-3.7766	2.1356	0.046059	0.38453	-4.3495	s2f_0381291001	putative uncharacterized protein flj46204
s2f_0383044001	-1.5842	-1.2952	-2.135	0.046107	0.38453	-4.3504	s2f_0383044001	dentin sialophosphoprotein-like
s2f_0001415003	-0.52315	4.2822	-2.135	0.046107	0.38453	-4.3504	OSGEPL1	probable trna n6-adenosine threonylcarbamoyltransferase, mitochondrial
s2f_0382441001	-0.46084	4.2817	-2.1345	0.046159	0.38453	-4.3514	s2f_0382441001	uncharacterized protein loc121870299
s2f_0000657009	-0.92046	0.61269	-2.1344	0.046162	0.38453	-4.3515	DSIM_GD21651	transcription factor e2f4-like
s2f_0219960001	-1.069	-2.1237	-2.1335	0.046252	0.38469	-4.3532	s2f_0219960001	uncharacterized protein loc113823413
s2f_0047340001	0.72774	-3.86	2.1334	0.046254	0.38469	-4.3532	s2f_0047340001	cuticle protein 19.8-like
s2f_0011883001	0.46947	3.0159	2.1307	0.046504	0.38643	-4.358	BM6191	hypothetical protein
s2f_0004950003	-0.40747	3.8881	-2.1304	0.046537	0.38643	-4.3586	THYB	thymidine kinase, cytosolic-like
s2f_0144805001	1.435	-2.8312	2.1292	0.046645	0.38703	-4.3607	s2f_0144805001	uncharacterized protein loc113809163 isoform x1
s2f_0035537001	-0.63181	3.4792	-2.1284	0.046723	0.38737	-4.3621	s2f_0035537001	(genbank) hypothetical protein
s2f_0093770001	-0.74619	1.5832	-2.1279	0.046769	0.38744	-4.363	s2f_0093770001	cytadherence high molecular weight protein 1-like
s2f_0219730001	-1.3018	-1.1523	-2.1273	0.046819	0.38756	-4.3639	s2f_0219730001	uncharacterized protein loc113800444
s2f_0000066026	0.9873	-0.55933	2.1265	0.046899	0.38792	-4.3654	GRTP1	growth hormone-regulated tbc protein 1
s2f_0382026001	1.2257	-2.7522	2.1254	0.047	0.38844	-4.3673	s2f_0382026001	uncharacterized protein ddb_g0271670-like
s2f_0001837002	0.39459	5.4756	2.1242	0.047111	0.38896	-4.3694	CHMP1B	charged multivesicular body protein 1b
s2f_0003152002	0.35793	6.1938	2.1235	0.04718	0.38896	-4.3707	ARGO, VRI, VRILLE	nuclear factor interleukin-3-regulated protein
s2f_0007117002	-0.62069	1.1037	-2.1233	0.047192	0.38896	-4.3709	BMA-TMEM-231	transmembrane protein 231-like
s2f_0001742002	-0.55194	3.6521	-2.1231	0.047209	0.38896	-4.3712	ADA2A	transcriptional adapter 2-alpha-like isoform x1
s2f_0000191010	-0.86414	2.6053	-2.1223	0.047287	0.3893	-4.3727	OS04G0625400	btb/poz and math domain-containing protein 2-like
s2f_0093681001	-1.0442	1.8768	-2.1206	0.047444	0.39029	-4.3756	s2f_0093681001	proteoglycan 4-like
s2f_0000126006	0.51444	4.747	2.1199	0.047518	0.39059	-4.377	BMA-GLY-10	n-acetylgalactosaminyltransferase 6-like
s2f_0001088003	-0.39858	7.2418	-2.1189	0.047605	0.39085	-4.3786	RBBP7	histone-binding protein rbbp7
s2f_0019212001	0.82998	0.26792	2.1187	0.047624	0.39085	-4.3789	s2f_0019212001	(genbank) hypothetical protein
s2f_0020514001	-0.31883	3.2944	-2.118	0.047696	0.3909	-4.3803	SYMBB.V1.2.006723.T1	hypothetical protein
s2f_0000528008	-0.39964	3.4881	-2.1179	0.047708	0.3909	-4.3805	CG4678	carboxypeptidase m isoform x1
s2f_0036950001	0.70291	8.2307	2.1175	0.04774	0.3909	-4.3811	CLEC-10	c-type lectin
s2f_0000339008	0.64583	1.2861	2.1167	0.04782	0.39125	-4.3826	OSBPL6	oxysterol-binding protein-related protein 6 isoform x1
s2f_0381840001	1.2799	-2.1747	2.1148	0.047997	0.39239	-4.3858	s2f_0381840001	uncharacterized protein loc121865517
s2f_0004057001	-0.52946	2.456	-2.1129	0.048183	0.39306	-4.3892	AGABI1DRAFT_123988	hypothetical protein
s2f_0000098013	-1.0702	-2.1491	-2.1128	0.048188	0.39306	-4.3893	SYT19	hypothetical protein
s2f_0008513001	-0.34661	2.8349	-2.1128	0.04819	0.39306	-4.3893	SIVA1	apoptosis regulatory protein siva
s2f_0000002117	-1.4153	-3.3187	-2.1118	0.048287	0.39335	-4.3911	NOTO	homeobox protein notochord
s2f_0144865001	-0.70324	1.3673	-2.1116	0.048307	0.39335	-4.3915	s2f_0144865001	uncharacterized protein loc113823070
s2f_0380958001	-1.2907	-3.145	-2.1112	0.048337	0.39335	-4.392	s2f_0380958001	uncharacterized protein loc121858044 isoform x1
s2f_0007105002	-0.69421	2.4715	-2.1106	0.048401	0.39357	-4.3932	GSTCD	glutathione s-transferase c-terminal domain-containing protein homolog
s2f_0002572004	0.29848	6.6947	2.1094	0.048516	0.3942	-4.3953	USP24	ubiquitin carboxyl-terminal hydrolase 24 isoform x1
s2f_0093753001	-0.89915	-2.7675	-2.108	0.048646	0.39496	-4.3976	s2f_0093753001	uncharacterized protein loc113810272
s2f_0000293014	0.69247	2.1557	2.1071	0.04874	0.39542	-4.3993	CBR-CLEC-180	galactose-specific lectin nattectin-like
s2f_0004395001	-0.46099	4.9063	-2.1054	0.048903	0.39643	-4.4023	17.M07808	hypothetical protein
s2f_0004676003	0.56993	3.8012	2.1046	0.04898	0.39675	-4.4036	RCDK	myelin regulatory factor-like protein isoform x1
s2f_0052509001	0.71621	0.68003	2.1038	0.049051	0.39703	-4.4049	s2f_0052509001	uncharacterized protein loc108669804
s2f_0000040047	0.55703	4.202	2.1031	0.049125	0.39732	-4.4062	ANGPT4	angiopoietin-related protein 7-like
s2f_0003322004	-0.32091	3.8114	-2.1019	0.049237	0.39792	-4.4082	CG33090	non-lysosomal glucosylceramidase-like
s2f_0003761003	0.37848	2.449	2.1006	0.049363	0.39863	-4.4105	BMA-MCP-1	gdp-d-glucose phosphorylase 1
s2f_0008760001	-0.78063	0.66011	-2.0998	0.049447	0.39901	-4.412	TMEM117	transmembrane protein 117-like
s2f_0381303001	-0.71375	1.6292	-2.0966	0.049758	0.40121	-4.4175	s2f_0381303001	uncharacterized protein loc121860724
s2f_0001324003	0.38026	6.8996	2.0956	0.049859	0.40172	-4.4193	PEPD	xaa-pro dipeptidase
s2f_0107794001	0.64011	2.3856	2.0944	0.049971	0.40217	-4.4212	s2f_0107794001	uncharacterized protein loc111641793
s2f_0000018005	-0.44467	4.1387	-2.0941	0.050004	0.40217	-4.4218	AGABI1DRAFT_77172	calmodulin-like protein 2
s2f_0005654002	-0.50795	4.877	-2.0939	0.050029	0.40217	-4.4223	SPRTN	sprt-like domain-containing protein spartan
s2f_0005240002	1.3518	-0.8937	2.0934	0.050073	0.40222	-4.423	BMA-LMD-1	lysm and putative peptidoglycan-binding domain-containing protein 3
s2f_0025199001	1.3645	-1.2806	2.0927	0.050143	0.40241	-4.4242	CG3548	(genbank) uncharacterized protein
s2f_0004685002	-0.44859	2.8221	-2.0924	0.050175	0.40241	-4.4248	ALKB	hypothetical protein
s2f_0011322001	0.45419	5.6371	2.092	0.050211	0.40241	-4.4254	CHT1_2	serine-rich adhesin for platelets
s2f_0381382001	2.133	-2.2091	2.091	0.050314	0.40277	-4.4272	s2f_0381382001	uncharacterized protein loc121861458
s2f_0200332001	-1.1838	-3.6676	-2.0908	0.050332	0.40277	-4.4276	s2f_0200332001	cleavage and polyadenylation specificity factor subunit 6-like
s2f_0000587004	1.2646	1.7252	2.0896	0.05045	0.40336	-4.4296	AMAN-1	lysosomal alpha-mannosidase-like
s2f_0000084027	1.068	-0.7063	2.0886	0.050549	0.40336	-4.4313	HAND1	heart- and neural crest derivatives-expressed protein 1
s2f_0003435002	0.47027	5.2176	2.0885	0.050561	0.40336	-4.4315	BMA-TRAM-1	translocating chain-associated membrane protein 1
s2f_0075253001	-0.43224	3.1713	-2.0884	0.050576	0.40336	-4.4318	s2f_0075253001	centromere-associated protein e-like
s2f_0015593001	-0.69068	0.89603	-2.0881	0.050596	0.40336	-4.4321	ACYPI31162	protein crumbs-like
s2f_0009170002	-1.1486	-1.9799	-2.0874	0.050669	0.40342	-4.4334	CUSR	uncharacterized protein cusr
s2f_0003720001	0.4702	7.2172	2.0866	0.050751	0.40342	-4.4348	ASS1	argininosuccinate synthase
s2f_0004048001	-0.34401	3.2277	-2.0866	0.050755	0.40342	-4.4349	ORC2	origin recognition complex subunit 2
s2f_0000084025	0.54893	0.93683	2.0864	0.050771	0.40342	-4.4352	SI:CH211-246M6.4	transcription factor 15-like
s2f_0382078001	-1.2881	-2.4458	-2.0855	0.050857	0.40342	-4.4367	s2f_0382078001	gata zinc finger domain-containing protein 14-like
s2f_0000250013	-1.3162	-2.1932	-2.0848	0.050936	0.40342	-4.438	DGKB	diacylglycerol kinase beta isoform x1
s2f_0380882001	-0.96155	-3.6544	-2.0843	0.050981	0.40342	-4.4388	s2f_0380882001	protein fam186a-like
s2f_0000050006	-0.53098	2.2335	-2.0842	0.050994	0.40342	-4.439	BMA-MGL-3	metabotropic glutamate receptor 8-like
s2f_0112904001	-0.40841	2.0496	-2.084	0.051009	0.40342	-4.4393	s2f_0112904001	uncharacterized protein loc113806635
s2f_0004308002	0.73458	2.6054	2.0839	0.051022	0.40342	-4.4395	TLCD2	tlc domain-containing protein 2-like
s2f_0200328001	0.44737	2.4698	2.0838	0.051034	0.40342	-4.4397	s2f_0200328001	mucin-19-like isoform x1
s2f_0006329002	-0.37852	2.4698	-2.0835	0.051061	0.40342	-4.4402	CG18675	upf0769 protein c21orf59 homolog
s2f_0080085001	0.54928	3.7346	2.0818	0.051229	0.40444	-4.4431	s2f_0080085001	uncharacterized protein loc108667208
s2f_0000021031	0.67953	0.41691	2.0809	0.05132	0.40486	-4.4446	PTPRO	receptor-type tyrosine-protein phosphatase o isoform x1
s2f_0145263001	-1.6312	-3.3315	-2.0799	0.051429	0.40541	-4.4465	s2f_0145263001	nitrogen regulation protein ntry-like
s2f_0000009042	-0.36359	3.4325	-2.0792	0.0515	0.40568	-4.4477	TNNI3K	serine/threonine-protein kinase tnni3k
s2f_0383455001	2.262	-1.6962	2.0786	0.051559	0.40583	-4.4487	s2f_0383455001	dna ligase 1-like
s2f_0004210004	0.68368	1.3747	2.078	0.051621	0.40599	-4.4497	FTCDNL1	formiminotransferase n-terminal subdomain-containing protein isoform x1
s2f_0006391001	0.48168	4.2284	2.0776	0.051655	0.40599	-4.4503	GSTK1	glutathione s-transferase kappa 1
s2f_0000787003	-0.57048	1.6735	-2.0771	0.051707	0.4061	-4.4512	AK5L	adenylate kinase isoenzyme 1-like
s2f_0380520001	1.0803	-3.3953	2.074	0.052029	0.40776	-4.4566	s2f_0380520001	rna-binding protein 33-like
s2f_0017574001	-0.48959	1.1386	-2.0736	0.052062	0.40776	-4.4572	DSIM_GD25263	(genbank) hypothetical protein
s2f_0001683004	-0.38591	4.8791	-2.0736	0.052063	0.40776	-4.4572	FRAS1	extracellular matrix protein fras1-like
s2f_0004520003	-0.59976	2.8077	-2.0735	0.052073	0.40776	-4.4574	SSUH2.1	protein ssuh2 homolog
s2f_0000487007	0.50927	1.8777	2.0725	0.052182	0.40825	-4.4592	DSIM_GD21466	d-beta-hydroxybutyrate dehydrogenase, mitochondrial
s2f_0000050014	-0.57069	1.9922	-2.0722	0.052213	0.40825	-4.4597	GRM1	metabotropic glutamate receptor 1 isoform x1
s2f_0144631001	-0.34926	5.1094	-2.0694	0.052499	0.41018	-4.4645	s2f_0144631001	uncharacterized protein loc121860593 isoform x1
s2f_0001449005	0.6467	1.0319	2.0673	0.052717	0.41118	-4.4681	ACOT6	putative acyl-coenzyme a thioesterase 6
s2f_0005501001	0.5855	4.5518	2.067	0.052743	0.41118	-4.4686	BM5538	hypothetical protein
s2f_0000733002	-0.37588	4.7727	-2.067	0.052743	0.41118	-4.4686	RFC4	replication factor c subunit 4
s2f_0016381001	0.70497	1.4587	2.0658	0.052868	0.41185	-4.4706	s2f_0016381001	(genbank) hypothetical protein
s2f_0000946002	0.617	-1.3792	2.0646	0.052992	0.41251	-4.4727	SLC35D2	udp-n-acetylglucosamine/udp-glucose/gdp-mannose transporter isoform x1
s2f_0000785007	-0.8019	0.8381	-2.0634	0.053126	0.41324	-4.4749	NRK	tyrosine-protein kinase transmembrane receptor ror2
s2f_0000538007	0.31539	6.455	2.0621	0.053256	0.41324	-4.477	ESYT2	hypothetical protein
s2f_0003341001	-0.44252	2.6529	-2.062	0.053264	0.41324	-4.4772	SOCS6	suppressor of cytokine signaling 6
s2f_0112999001	-0.37534	3.8105	-2.0616	0.053307	0.41324	-4.4779	s2f_0112999001	uncharacterized protein loc108676122 isoform x1
s2f_0012613001	-0.5105	1.8252	-2.0609	0.05338	0.41324	-4.4791	CG4658	hypothetical protein
s2f_0001377003	0.33589	4.4793	2.0607	0.053403	0.41324	-4.4795	SYVN1	e3 ubiquitin-protein ligase synoviolin
s2f_0010358001	-0.4346	2.6814	-2.0607	0.053404	0.41324	-4.4795	BMB	protein brambleberry-like
s2f_0200355001	-0.63971	4.2102	-2.0605	0.053424	0.41324	-4.4798	s2f_0200355001	protein lava lamp-like
s2f_0000016148	0.48539	2.4557	2.0604	0.053437	0.41324	-4.48	s2f_0000016148	hypothetical protein
s2f_0000153002	-0.45468	6.2839	-2.0564	0.053857	0.41618	-4.4869	MCM4	dna replication licensing factor mcm4
s2f_0001185006	0.61118	2.2535	2.0558	0.053918	0.41635	-4.4878	s2f_0001185006	g-protein coupled receptor mth2-like
s2f_0006166004	-1.0629	-0.48889	-2.0549	0.054018	0.41662	-4.4895	SI:CH211-212D10.2	hypothetical protein
s2f_0012096001	0.55573	4.0806	2.0547	0.054031	0.41662	-4.4897	SYMBB.V1.2.009980.T1	insulin-like growth factor 1 receptor
s2f_0005237001	-0.55158	2.2182	-2.0541	0.054096	0.41681	-4.4907	KIAA0930	uncharacterized protein kiaa0930 homolog
s2f_0005498002	-0.41322	4.139	-2.0537	0.054139	0.41684	-4.4914	USHBP1	colorectal mutant cancer protein isoform x1
s2f_0005418004	0.66666	2.3141	2.0529	0.054225	0.41691	-4.4928	BMP9, BMP10	bone morphogenetic protein 10-like
s2f_0200390001	-0.47078	1.9746	-2.0522	0.054306	0.41691	-4.4941	s2f_0200390001	uncharacterized protein loc121857526
s2f_0144526001	-0.76527	0.13817	-2.0521	0.054315	0.41691	-4.4943	s2f_0144526001	glycine receptor subunit alphaz1-like
s2f_0000114011	0.71118	0.54405	2.0519	0.054333	0.41691	-4.4945	CG12398	glucose dehydrogenase [fad, quinone]
s2f_0001540003	-0.52308	5.5051	-2.0518	0.054346	0.41691	-4.4948	SMARCD2	swi/snf-related matrix-associated actin-dependent regulator of chromatin subfamily d member 3 isoform x1
s2f_0009967002	0.60069	3.0571	2.0502	0.054513	0.41756	-4.4974	s2f_0009967002	crustacean hyperglycemic hormone-like
s2f_0200385001	-0.8181	3.6135	-2.05	0.054535	0.41756	-4.4978	s2f_0200385001	uncharacterized protein loc121856902
s2f_0144588001	-0.62292	3.9013	-2.0499	0.054549	0.41756	-4.498	s2f_0144588001	uncharacterized protein loc113806557
s2f_0000793008	0.86907	-3.7319	2.0485	0.054698	0.4184	-4.5004	AGABI1DRAFT_119334	hypothetical protein
s2f_0000278018	0.35851	4.8203	2.0458	0.054986	0.4203	-4.505	VVL	pou domain protein cf1a
s2f_0000401009	0.33102	7.018	2.0447	0.055107	0.42092	-4.5069	GPX4	probable phospholipid hydroperoxide glutathione peroxidase
s2f_0383372001	-1.2442	-3.6097	-2.0432	0.055271	0.42174	-4.5095	s2f_0383372001	putative uncharacterized protein ddb_g0286901
s2f_0382085001	-1.2257	-3.3207	-2.0427	0.055321	0.42174	-4.5103	s2f_0382085001	glutenin, high molecular weight subunit pw212-like
s2f_0000709006	0.47323	5.6225	2.0426	0.055334	0.42174	-4.5105	CHAT	carnitine o-acetyltransferase-like
s2f_0000472004	0.832	2.974	2.0413	0.055471	0.42234	-4.5127	AEX-5	pc3-like endoprotease variant b
s2f_0000346009	-0.35629	4.8969	-2.0411	0.055492	0.42234	-4.513	MSH6	dna mismatch repair protein msh6
s2f_0006660001	-0.69397	4.0002	-2.0403	0.055578	0.42269	-4.5143	DSIM_GD28084	proto-oncogene tyrosine-protein kinase ros-like
s2f_0007312001	0.46063	1.9643	2.0387	0.055759	0.42371	-4.5172	s2f_0007312001	protein spaetzle 5 isoform x1
s2f_0002549002	0.64581	0.55967	2.0384	0.055793	0.42371	-4.5177	BM12807	tumor necrosis factor alpha-induced protein 8-like protein isoform x1
s2f_0000033013	-0.392	2.8629	-2.0379	0.055843	0.42379	-4.5185	CDK9	cyclin-dependent kinase 9
s2f_0002813003	0.34001	4.3572	2.0374	0.055895	0.42388	-4.5193	BMA-ZYG-11	protein zyg-11 homolog b-like
s2f_0381288001	-1.4479	-3.5395	-2.0363	0.056014	0.42448	-4.5212	s2f_0381288001	vegetative cell wall protein gp1-like
s2f_0000134006	0.69169	2.1446	2.0353	0.056129	0.4247	-4.5229	KCNK6	potassium channel subfamily k member 6
s2f_0003266002	-0.52053	8.9137	-2.0351	0.056147	0.4247	-4.5232	18.M06139	hypothetical protein
s2f_0000064012	0.42981	4.7675	2.035	0.056164	0.4247	-4.5235	BM2134	monocarboxylate transporter 12
s2f_0003827002	-0.34406	4.6802	-2.0335	0.056328	0.42564	-4.526	RNPS1	hypothetical protein
s2f_0013410001	0.55854	2.2524	2.0331	0.056373	0.42567	-4.5267	BM11003	clarin-3
s2f_0112782001	1.051	-0.14165	2.0321	0.056476	0.42615	-4.5283	s2f_0112782001	uncharacterized protein loc113823988
s2f_0015001001	0.52923	4.5505	2.0318	0.056516	0.42615	-4.5289	DSIM_GD11532	leucine-rich repeat-containing protein 15
s2f_0005157004	-0.52214	3.2855	-2.031	0.056596	0.42645	-4.5302	BMA-GRAS-1	hypothetical protein
s2f_0000640007	-1.1511	-3.2068	-2.0279	0.056939	0.42863	-4.5354	ANC1	adp,atp carrier protein 3, mitochondrial-like
s2f_0200416001	-0.92822	4.4748	-2.0277	0.056967	0.42863	-4.5359	s2f_0200416001	leucine-rich repeat extensin-like protein 3
s2f_0000028039	-1.2528	-1.6763	-2.0264	0.057111	0.42921	-4.5381	UNCX	homeobox protein unc-4 homolog
s2f_0007405002	-0.36923	3.1255	-2.0263	0.057125	0.42921	-4.5383	BM4314	uncharacterized protein c19orf47 homolog
s2f_0086119001	-0.4587	2.3429	-2.0258	0.057177	0.4293	-4.5391	s2f_0086119001	histone acetyltransferase kat6a-like
s2f_0003532005	0.82742	-0.38193	2.0241	0.057372	0.43039	-4.542	ZGC:64002	nicotinamide n-methyltransferase-like
s2f_0003674004	-0.49508	1.3325	-2.0235	0.05743	0.43039	-4.5429	BM3756	geranylgeranyl pyrophosphate synthase-like
s2f_0381323001	-0.3253	3.1332	-2.0234	0.057446	0.43039	-4.5432	s2f_0381323001	uncharacterized protein loc121860955 isoform x1
s2f_0006516002	-0.47622	3.4431	-2.0224	0.057559	0.43094	-4.5449	STUM	protein stum
s2f_0002874004	0.79918	-0.60833	2.0202	0.0578	0.43231	-4.5485	IGF2BP2	insulin-like growth factor 2 mrna-binding protein 2 isoform x1
s2f_0381216001	0.97389	-2.1335	2.0198	0.057848	0.43231	-4.5492	s2f_0381216001	uncharacterized protein loc121860056 isoform x1
s2f_0016362001	-1.2461	0.90582	-2.0194	0.057892	0.43231	-4.5499	CG30380	(genbank) uncharacterized protein
s2f_0004877002	-0.40643	4.3994	-2.0193	0.057906	0.43231	-4.5501	AGABI1DRAFT_66327	protein nrde2 homolog
s2f_0077133001	-1.1249	0.011409	-2.0189	0.057954	0.43237	-4.5508	s2f_0077133001	trichohyalin
s2f_0000183014	0.32706	4.9274	2.0173	0.058133	0.4333	-4.5535	CG34347	band 4.1-like protein 4 isoform x1
s2f_0001280005	0.42847	4.8429	2.0169	0.058178	0.4333	-4.5542	BM6815	phosphatidylinositol transfer protein alpha isoform
s2f_0380412001	-1.3629	-1.997	-2.0167	0.058202	0.4333	-4.5545	s2f_0380412001	mucin-2-like
s2f_0144896001	1.4518	-1.3221	2.016	0.058276	0.43355	-4.5557	s2f_0144896001	flocculation protein flo11-like
s2f_0144516001	1.0781	0.00040109	2.0156	0.058319	0.43356	-4.5563	s2f_0144516001	uncharacterized protein loc113821580
s2f_0070675001	-0.96808	-1.3147	-2.0149	0.058406	0.4339	-4.5576	s2f_0070675001	uncharacterized protein loc108681686
s2f_0000794003	0.55595	3.2124	2.0131	0.058604	0.43506	-4.5605	RHPN2	rhophilin-2
s2f_0002085004	-0.46908	5.5899	-2.0127	0.058653	0.43512	-4.5613	DSIM_GD15902	g-protein coupled receptor grl101-like
s2f_0014463001	-0.72344	1.5021	-2.0111	0.058839	0.43591	-4.564	EH	eclosion hormone
s2f_0007163001	-0.36693	3.7856	-2.0111	0.058841	0.43591	-4.5641	DSIM_GD20552	nuclear pore complex protein nup88
s2f_0001834004	-0.60829	1.3443	-2.0098	0.058987	0.43638	-4.5662	MKRN2	probable e3 ubiquitin-protein ligase makorin-2
s2f_0000807007	0.80351	0.63671	2.0098	0.058987	0.43638	-4.5662	ARSJ	arylsulfatase b-like
s2f_0000088020	1.1806	-0.73957	2.0089	0.059087	0.43644	-4.5677	KLF15	krueppel-like factor 15
s2f_0000033026	-0.86128	1.2891	-2.0085	0.059131	0.43644	-4.5683	CDK14	cyclin-dependent kinase 14 isoform x1
s2f_0000065023	0.55952	6.0567	2.0084	0.059145	0.43644	-4.5685	DHRS12	dehydrogenase/reductase sdr family member 12
s2f_0004513001	-0.49194	3.686	-2.0083	0.05916	0.43644	-4.5688	DNAJC13	dnaj homolog subfamily c member 13 isoform x1
s2f_0002384004	1.0193	0.88493	2.0078	0.059213	0.43652	-4.5695	s2f_0002384004	calcium-activated chloride channel regulator 1-like
s2f_0093794001	0.95894	-0.57637	2.006	0.059421	0.43772	-4.5726	s2f_0093794001	uncharacterized protein loc113809491
s2f_0001384004	0.79431	4.4701	2.0057	0.059457	0.43772	-4.5731	AN08G08490	calcium-independent phospholipase a2-gamma-like
s2f_0001853002	0.46542	6.0094	2.0051	0.059531	0.43774	-4.5742	AGABI1DRAFT_111593	macrophage migration inhibitory factor-like
s2f_0000014048	-0.62266	14.515	-2.005	0.059543	0.43774	-4.5744	MYH16	myosin heavy chain, muscle-like
s2f_0000018042	-1.2516	8.7251	-2.0041	0.059638	0.4378	-4.5758	DPSE_TPNCIA	troponin c
s2f_0015604001	-0.62841	1.3479	-2.0039	0.059667	0.4378	-4.5762	ASTCC	(genbank) hypothetical protein
s2f_0000029012	-0.28876	3.6135	-2.0036	0.059705	0.4378	-4.5767	BMA-SET-1	histone-lysine n-methyltransferase pr-set7
s2f_0112844001	-0.96155	-3.415	-2.0032	0.059751	0.4378	-4.5774	s2f_0112844001	testis-specific gene a8 protein-like
s2f_0003934007	-0.94147	1.4225	-2.0026	0.059813	0.4378	-4.5783	SPR	sex peptide receptor-like
s2f_0002553003	-0.44756	1.4525	-2.0024	0.05984	0.4378	-4.5787	DSIM_GD22547	homer protein homolog 2
s2f_0144772001	0.54537	0.65565	2.0021	0.059872	0.4378	-4.5792	s2f_0144772001	uncharacterized protein loc113809504
s2f_0020947001	1.0681	-2.2994	2.002	0.059883	0.4378	-4.5793	s2f_0020947001	serine/threonine-protein kinase pkn2-like
s2f_0113036001	-1.524	-2.8666	-1.9996	0.060167	0.43911	-4.5834	s2f_0113036001	ceramide-1-phosphate transfer protein-like
s2f_0200323001	-0.66728	1.6481	-1.9996	0.06017	0.43911	-4.5835	s2f_0200323001	protein krueppel-like
s2f_0001041001	0.37444	7.6976	1.9994	0.060187	0.43911	-4.5837	BMA-FLN-2	filamin-a-like
s2f_0144752001	1.2864	0.075409	1.9983	0.060315	0.43975	-4.5856	s2f_0144752001	transmembrane protease serine 9-like
s2f_0000499016	-0.38514	2.8093	-1.9977	0.060386	0.43996	-4.5866	ZFP57	zinc finger protein 709-like
s2f_0381437001	-1.395	-3.7231	-1.9954	0.060663	0.44168	-4.5906	s2f_0381437001	mucin-1-like
s2f_0382075001	-0.67973	6.469	-1.9941	0.060805	0.44226	-4.5926	s2f_0382075001	proline-rich protein 36-like
s2f_0014471001	0.39413	4.2052	1.994	0.060827	0.44226	-4.5929	CG16959	(genbank) hypothetical protein
s2f_0025991001	-0.50794	3.5491	-1.9932	0.060921	0.44264	-4.5943	SYMBB.V1.2.007625.T1	hypothetical protein
s2f_0064093001	-0.52187	9.7324	-1.9912	0.061159	0.44404	-4.5976	s2f_0064093001	lamprin 1.8-10-like
s2f_0007497002	0.88497	-0.90383	1.9908	0.061206	0.44404	-4.5983	CG4911	f-box only protein 33
s2f_0144553001	0.53452	3.3272	1.9905	0.061239	0.44404	-4.5988	s2f_0144553001	uncharacterized protein loc108668946
s2f_0001613004	0.67374	5.038	1.9899	0.061313	0.44407	-4.5998	TCP11L2	t-complex protein 11-like protein 2
s2f_0144890001	-0.66772	1.6285	-1.9897	0.061327	0.44407	-4.6	s2f_0144890001	nucleolar protein dao-5-like
s2f_0001861004	0.38761	5.3308	1.9885	0.061476	0.44474	-4.6021	CG5921	harmonin-like
s2f_0000299009	-0.40298	2.8964	-1.9881	0.061526	0.44474	-4.6028	DDX20	probable atp-dependent rna helicase ddx20
s2f_0200595001	1.0728	-3.6288	1.9878	0.061558	0.44474	-4.6033	s2f_0200595001	basic salivary proline-rich protein 2-like
s2f_0000321013	-1.1838	-2.9526	-1.9875	0.061589	0.44474	-4.6037	OS03G0682200, AGO12, ARGONAUTE_12	protein argonaute mel1-like
s2f_0021651001	0.32806	4.312	1.985	0.061886	0.44658	-4.6079	s2f_0021651001	ankyrin-1-like
s2f_0005136001	0.54872	2.2847	1.9841	0.062001	0.4468	-4.6095	TRM13	trna:m(4)x modification enzyme trm13 homolog
s2f_0003754002	-0.45355	5.3812	-1.9839	0.062018	0.4468	-4.6097	RRP4	exosome complex component rrp4 homolog
s2f_0043394001	0.77768	0.50723	1.9837	0.062042	0.4468	-4.6101	s2f_0043394001	g-protein coupled receptor moody-like
s2f_0004124006	0.84502	2.1725	1.9822	0.062227	0.44765	-4.6127	s2f_0004124006	reticulophagy regulator 3-like
s2f_0000912004	0.47482	7.5905	1.9821	0.062245	0.44765	-4.6129	CYS3	cystathionine gamma-lyase
s2f_0000260003	-0.42265	7.2837	-1.9801	0.062483	0.44905	-4.6162	ABTS-1	electroneutral sodium bicarbonate exchanger 1 isoform x1
s2f_0000749005	-0.48574	3.457	-1.9785	0.062675	0.45003	-4.6189	ZIZA	hypothetical protein
s2f_0004962001	-0.37776	2.8248	-1.9782	0.062704	0.45003	-4.6193	BMA-RNF-121	ring finger protein 121
s2f_0000142017	-0.74958	-0.34866	-1.9774	0.062808	0.45029	-4.6207	LMX1B	lim homeobox transcription factor 1-alpha
s2f_0000522004	1.9714	-0.28987	1.9771	0.062844	0.45029	-4.6212	s2f_0000522004	probable rna-binding protein 46
s2f_0001055001	0.64797	7.2571	1.9769	0.062868	0.45029	-4.6215	B	cysteine sulfinic acid decarboxylase
s2f_0000416008	0.35789	4.7739	1.9741	0.063212	0.45237	-4.6263	BMA-PAT-2.1	integrin alpha-8-like
s2f_0006758004	0.82038	-0.14904	1.9737	0.063255	0.45237	-4.6268	TCF24	transcription factor 24
s2f_0000346005	-0.38508	6.6334	-1.9735	0.063287	0.45237	-4.6273	MSH2	dna mismatch repair protein msh2
s2f_0009267004	-1.3269	-2.0315	-1.9719	0.063479	0.45292	-4.6299	s2f_0009267004	thap domain-containing protein 2-like
s2f_0380583001	-1.2581	-3.4385	-1.9719	0.06348	0.45292	-4.6299	s2f_0380583001	keratin-associated protein 16-1-like
s2f_0000000149	0.33225	3.8409	1.9715	0.063525	0.45292	-4.6305	NCAS0A09620	uncharacterized protein k02a2.6-like
s2f_0000014024	-0.30016	5.016	-1.9711	0.063576	0.45292	-4.6312	MYO9A	unconventional myosin-ixa isoform x1
s2f_0005378001	-0.32369	4.9599	-1.9711	0.063577	0.45292	-4.6312	ANI-1	anillin-like
s2f_0000070014	0.50413	2.4598	1.9703	0.063671	0.45323	-4.6325	AGABI1DRAFT_80770	hypothetical protein
s2f_0000697003	-0.44811	7.8203	-1.97	0.063706	0.45323	-4.633	CG5023	myophilin
s2f_0007796002	1.135	-1.6945	1.9685	0.063892	0.4541	-4.6355	SPATA7	spermatogenesis-associated protein 7 homolog
s2f_0144776001	1.1025	-0.97863	1.9683	0.063915	0.4541	-4.6358	s2f_0144776001	uncharacterized protein loc108676125
s2f_0000013048	0.56557	2.7266	1.9658	0.064228	0.45575	-4.6401	NIM1K	serine/threonine-protein kinase nim1
s2f_0000153013	-0.42355	2.8302	-1.9655	0.064259	0.45575	-4.6405	MCM8	dna helicase mcm8-like
s2f_0109899001	1.0105	5.8245	1.9654	0.064276	0.45575	-4.6407	s2f_0109899001	uncharacterized protein loc111707219
s2f_0000709007	0.50716	3.5275	1.9645	0.064388	0.45623	-4.6422	CROT	peroxisomal carnitine o-octanoyltransferase
s2f_0001511002	-0.49684	0.52722	-1.9614	0.064773	0.45866	-4.6474	TMC4	transmembrane channel-like protein 7
s2f_0003247001	-0.32084	5.704	-1.9602	0.064923	0.45941	-4.6494	BM2545	protein fam98a
s2f_0200387001	-1.1155	-1.7104	-1.9581	0.065185	0.46039	-4.6528	s2f_0200387001	uncharacterized protein loc121857238
s2f_0008888002	0.32108	4.4364	1.9575	0.06526	0.46039	-4.6538	BM1950	hypothetical protein
s2f_0382116001	-0.58814	2.2391	-1.9574	0.065268	0.46039	-4.654	s2f_0382116001	uncharacterized protein loc121867423
s2f_0382006001	-1.008	-3.7619	-1.9573	0.065282	0.46039	-4.6541	s2f_0382006001	extensin-like
s2f_0001183003	-0.32685	9.617	-1.9568	0.065352	0.46039	-4.6551	CCT5	t-complex protein 1 subunit epsilon
s2f_0004713003	-0.41876	2.5624	-1.9566	0.065369	0.46039	-4.6553	BLD10	centrosomal protein of 135 kda isoform x1
s2f_0018491001	-1.4294	-3.4678	-1.9563	0.065416	0.46039	-4.6559	s2f_0018491001	hypothetical protein
s2f_0003370001	-0.37538	4.4628	-1.956	0.065445	0.46039	-4.6563	ITT1	e3 ubiquitin-protein ligase rnf14-like
s2f_0006450002	-0.53513	4.2087	-1.956	0.065452	0.46039	-4.6564	BM4336	kicstor complex protein szt2-like
s2f_0383259001	-0.60696	1.742	-1.9551	0.065561	0.46085	-4.6578	s2f_0383259001	math and lrr domain-containing protein pfe0570w-like isoform x1
s2f_0078422001	-0.5522	1.2928	-1.9518	0.065974	0.46332	-4.6632	s2f_0078422001	(genbank) hypothetical protein
s2f_0000555005	-1.487	-0.72898	-1.9515	0.066024	0.46332	-4.6639	TUB	tubby protein homolog isoform x1
s2f_0000000018	0.8156	-0.51611	1.9513	0.066045	0.46332	-4.6642	ORF135, BRNAPMP066	--
s2f_0080113001	-0.4139	2.5202	-1.9504	0.066161	0.46376	-4.6657	s2f_0080113001	bromodomain-containing protein 4-like
s2f_0002069003	-0.56342	2.156	-1.9501	0.066195	0.46376	-4.6661	SI:DKEY-19E4.5	probable peptidyl-trna hydrolase 2
s2f_0014997001	-0.7179	0.83224	-1.949	0.066334	0.46443	-4.668	PBURS	partner of bursicon
s2f_0007595001	0.35742	5.3438	1.9486	0.066385	0.46447	-4.6686	BBX	hmg box transcription factor bbx
s2f_0112986001	0.89695	2.5872	1.9481	0.066448	0.46461	-4.6694	s2f_0112986001	insulin-like growth factor-binding protein complex acid labile subunit
s2f_0382310001	1.2376	-3.3324	1.9476	0.066514	0.46476	-4.6703	s2f_0382310001	spidroin-2-like
s2f_0383413001	-1.3875	-3.0772	-1.9472	0.066567	0.46476	-4.671	s2f_0383413001	uncharacterized protein loc121878815
s2f_0200562001	0.91232	1.9166	1.9469	0.066601	0.46476	-4.6714	s2f_0200562001	mucin-7-like
s2f_0003787001	-0.92347	3.6999	-1.9465	0.066648	0.46478	-4.672	46.T00021	atp-dependent (s)-nad(p)h-hydrate dehydratase
s2f_0004037001	-0.40887	5.3248	-1.9447	0.066886	0.46594	-4.6751	TAN1	hypothetical protein
s2f_0012756001	0.47906	3.6852	1.9444	0.06692	0.46594	-4.6755	BM7926	hypothetical protein
s2f_0003941002	-0.34265	5.0254	-1.9442	0.066949	0.46594	-4.6759	NUP205	nuclear pore complex protein nup205
s2f_0380351001	1.1765	-0.9631	1.9439	0.066991	0.46594	-4.6765	s2f_0380351001	uncharacterized pe-pgrs family protein pe_pgrs20-like
s2f_0005747001	-0.39924	5.5275	-1.9435	0.067041	0.46598	-4.6771	BMA-UNC-80	protein unc-80 homolog
s2f_0001664004	0.42724	3.2535	1.9423	0.067188	0.4667	-4.679	s2f_0001664004	5'-nucleotidase-like
s2f_0019625001	-0.40645	4.0242	-1.9414	0.067303	0.46694	-4.6805	s2f_0019625001	(genbank) hypothetical protein
s2f_0483962001	-0.9966	-1.1509	-1.9412	0.067333	0.46694	-4.6809	s2f_0483962001	uncharacterized protein loc122260748
s2f_0001934002	0.54451	2.8408	1.9409	0.06738	0.46694	-4.6814	DSIM_GD20727	metalloproteinase inhibitor 3-like
s2f_0005467001	-0.97159	-1.051	-1.9407	0.067399	0.46694	-4.6817	STIMATE	store-operated calcium entry regulator stimate-like
s2f_0000544007	-0.46248	4.974	-1.9397	0.067527	0.46713	-4.6833	ANKIB1	ankyrin repeat and ibr domain-containing protein 1 isoform x1
s2f_0080108001	-0.45884	3.6954	-1.9397	0.06753	0.46713	-4.6834	s2f_0080108001	uncharacterized protein loc108675417
s2f_0000000038	-0.59293	-0.8436	-1.9395	0.067559	0.46713	-4.6837	AGABI1DRAFT_48761	hypothetical protein
s2f_0000556004	-0.36236	2.8845	-1.9386	0.067676	0.46717	-4.6852	DAS2	probable uridine-cytidine kinase isoform x1
s2f_0144950001	-1.1166	-1.0507	-1.9384	0.067697	0.46717	-4.6855	s2f_0144950001	bone morphogenetic protein 3-like
s2f_0003458001	-1.367	-3.5651	-1.9384	0.067698	0.46717	-4.6855	NUO78	nadh dehydrogenase [ubiquinone] iron-sulfur protein 1, mitochondrial
s2f_0005106001	-0.3891	6.5709	-1.938	0.067744	0.46719	-4.6861	UOX	uricase
s2f_0001402005	0.52258	1.216	1.9372	0.067859	0.46768	-4.6876	TTC39C	tetratricopeptide repeat protein 39c-like
s2f_0014634001	-0.62919	1.1248	-1.9368	0.067905	0.46769	-4.6881	C24D10.49	(genbank) uncharacterized protein
s2f_0000792004	0.49442	2.8178	1.9362	0.067986	0.46794	-4.6892	ABCD4	atp-binding cassette sub-family d member 4 isoform x1
s2f_0000477008	0.38881	3.3207	1.9352	0.068119	0.46855	-4.6909	DCR-2	endoribonuclease dicer-like
s2f_0006365002	-0.88008	0.79157	-1.9348	0.06817	0.4686	-4.6915	TTC26	intraflagellar transport protein 56
s2f_0001032005	-1.1604	0.50715	-1.9332	0.068379	0.46953	-4.6941	CBR-KQT-3	potassium voltage-gated channel subfamily kqt member 1-like
s2f_0000033029	-0.47945	3.8851	-1.933	0.068395	0.46953	-4.6943	CDK1	cyclin-dependent kinase 1
s2f_0005058002	-0.47341	3.2904	-1.932	0.068532	0.47017	-4.6961	CDC27	hypothetical protein
s2f_0007092002	-0.41105	1.8607	-1.9307	0.068701	0.47073	-4.6982	BM9572	gonadal protein gdl
s2f_0383574001	0.70725	0.30476	1.9304	0.068739	0.47073	-4.6987	s2f_0383574001	vegetative cell wall protein gp1-like
s2f_0000355009	-0.7104	2.795	-1.9304	0.068747	0.47073	-4.6988	BMA-CYK-3	ubiquitin carboxyl-terminal hydrolase 32-like
s2f_0001629001	0.4956	4.7856	1.9284	0.069011	0.47198	-4.7021	N4BP2L1	nedd4-binding protein 2-like 1 isoform x1
s2f_0000163053	0.6461	3.1161	1.9283	0.069019	0.47198	-4.7022	s2f_0000163053	pro-resilin-like
s2f_0000064016	0.38543	5.9405	1.9275	0.069126	0.47199	-4.7035	BMA-GEM-1	monocarboxylate transporter 12-like
s2f_0026031001	-0.93778	-2.2722	-1.9275	0.069128	0.47199	-4.7035	s2f_0026031001	oocyte zinc finger protein xlcof6-like
s2f_0000153008	-0.38292	6.586	-1.9273	0.069155	0.47199	-4.7039	MCM7	dna replication licensing factor mcm7
s2f_0006389001	-0.37425	4.3343	-1.9262	0.069296	0.47265	-4.7056	ARHGAP11A	rho gtpase-activating protein 11a-like
s2f_0200600001	-0.78499	-0.46665	-1.9245	0.069524	0.47386	-4.7084	s2f_0200600001	uncharacterized protein loc121874247
s2f_0006827002	-0.40722	2.5864	-1.9242	0.069563	0.47386	-4.7089	CG30496	glomulin
s2f_0000079003	0.46768	5.0239	1.9235	0.069648	0.47393	-4.71	BM12973	dual specificity protein phosphatase 14-like
s2f_0144529001	0.80828	0.0014361	1.9234	0.069663	0.47393	-4.7102	s2f_0144529001	uncharacterized protein loc113802290
s2f_0006373001	0.81408	3.9861	1.9215	0.069918	0.47536	-4.7133	DSIM_GD18285	protein crebrf homolog
s2f_0001136002	-0.49806	1.216	-1.9205	0.070055	0.47599	-4.715	KINY	lim domain kinase 1 isoform x1
s2f_0000177006	-0.28593	7.918	-1.918	0.070392	0.47768	-4.7191	SRSF7	serine/arginine-rich splicing factor 7 isoform x1
s2f_0000318005	0.55462	4.2795	1.9178	0.070409	0.47768	-4.7193	CDHR2	protocadherin fat 4-like
s2f_0000205012	-0.33895	5.7614	-1.9172	0.070498	0.47768	-4.7204	TTLL8	tubulin monoglycylase ttll3-like
s2f_0034314001	0.50938	1.6171	1.9169	0.070537	0.47768	-4.7209	s2f_0034314001	cubilin-like
s2f_0003934006	-1.1029	-2.5	-1.9168	0.070544	0.47768	-4.721	CBR-SPRR-1	sex peptide receptor-like
s2f_0004971002	0.40353	1.4583	1.9166	0.070575	0.47768	-4.7214	GTF2H5	general transcription factor iih subunit 5
s2f_0113054001	-0.60942	0.28173	-1.9161	0.070641	0.47782	-4.7222	s2f_0113054001	histone acetyltransferase kat6b-like
s2f_0000134025	0.68653	0.66801	1.9144	0.070876	0.4791	-4.725	BM18061	twik family of potassium channels protein 7-like
s2f_0004819002	1.3338	0.61486	1.9136	0.070977	0.47948	-4.7262	CG1764	n(g),n(g)-dimethylarginine dimethylaminohydrolase 1-like
s2f_0000824004	-0.25963	4.862	-1.9128	0.071083	0.47977	-4.7275	AGABI1DRAFT_117056	hypothetical protein
s2f_0381820001	0.85236	-0.78343	1.9126	0.07111	0.47977	-4.7278	s2f_0381820001	mucin-19-like isoform x1
s2f_0005246004	-0.42709	1.838	-1.9111	0.071322	0.48089	-4.7304	CG13287	pr domain zinc finger protein 8
s2f_0015532001	-0.39578	1.8951	-1.9106	0.071391	0.48104	-4.7312	CG14312	(genbank) uncharacterized protein
s2f_0382304001	-0.36852	5.8798	-1.9096	0.071526	0.48165	-4.7329	s2f_0382304001	uncharacterized protein loc121869125
s2f_0000163077	-0.59838	0.19902	-1.9089	0.071625	0.48184	-4.734	CPR135	activating signal cointegrator 1 complex subunit 2 homolog
s2f_0002508002	-0.40378	3.4193	-1.9087	0.071645	0.48184	-4.7343	BMA-REPS-1	ralbp1-associated eps domain-containing protein 1
s2f_0000171026	-0.74006	0.93405	-1.9078	0.071765	0.48234	-4.7357	CRHR	diuretic hormone receptor-like
s2f_0093692001	-0.79448	3.3674	-1.9068	0.071899	0.48271	-4.7373	s2f_0093692001	uncharacterized protein loc113805200
s2f_0001243002	-0.29553	4.7856	-1.9068	0.071912	0.48271	-4.7375	BMA-CEL-1	mrna-capping enzyme
s2f_0002620001	-0.47375	2.6	-1.9047	0.072197	0.48383	-4.7409	ESCO1	hypothetical protein
s2f_0000158018	-1.1029	-3.301	-1.9046	0.072212	0.48383	-4.7411	ECH3	hypothetical protein
s2f_0001864001	1.0583	1.3092	1.9045	0.072215	0.48383	-4.7411	LYSMD2	lysm and putative peptidoglycan-binding domain-containing protein 2
s2f_0113107001	-0.33955	3.7917	-1.9038	0.072316	0.4842	-4.7423	s2f_0113107001	rho gtpase-activating protein 17-like
s2f_0014156001	0.42543	2.4945	1.9034	0.072368	0.48424	-4.7429	DSIM_GD24562	transmembrane protein fend
s2f_0006847002	0.55834	1.0176	1.9028	0.072461	0.48448	-4.744	BM2166	glycerate kinase
s2f_0006294001	-0.40139	2.762	-1.9025	0.072496	0.48448	-4.7444	DSIM_GD25867	tyrosine-protein kinase-like otk
s2f_0004292001	-0.35357	3.0188	-1.9002	0.072808	0.48615	-4.7481	RIC1	rab6a-gef complex partner protein 1 isoform x1
s2f_0000180005	-0.65182	5.8603	-1.9	0.072837	0.48615	-4.7485	BMA-CHT-1.1	probable chitinase 10
s2f_0000373009	-0.40114	1.284	-1.8982	0.073094	0.48737	-4.7515	XRCC3	dna repair protein xrcc3
s2f_0004657004	0.54747	1.9541	1.898	0.073113	0.48737	-4.7517	s2f_0004657004	(genbank) hypothetical protein
s2f_0382597001	0.72774	-3.8988	1.8969	0.073276	0.48793	-4.7536	s2f_0382597001	uncharacterized protein loc121871358
s2f_0080109001	-0.80504	-0.91277	-1.8968	0.073289	0.48793	-4.7538	s2f_0080109001	uncharacterized protein loc108665165 isoform x1
s2f_0382511001	0.86907	-3.6931	1.8958	0.073423	0.48827	-4.7553	s2f_0382511001	uncharacterized protein loc121870836
s2f_0144756001	0.52576	2.4459	1.8957	0.073432	0.48827	-4.7554	s2f_0144756001	uncharacterized protein loc121867576 isoform x1
s2f_0002952001	0.37331	3.9667	1.8951	0.073524	0.48847	-4.7565	PAR-6	partitioning defective protein 6
s2f_0004325002	0.33194	4.9824	1.8947	0.073576	0.48847	-4.7571	BMA-FLAP-1	leucine-rich repeat flightless-interacting protein 2 isoform x1
s2f_0144692001	0.67693	-1.2942	1.8945	0.073601	0.48847	-4.7574	s2f_0144692001	uncharacterized protein loc113818518
s2f_0057392001	-1.2773	-2.1602	-1.8933	0.07377	0.48907	-4.7594	s2f_0057392001	(genbank) serine protease
s2f_0382806001	-1.2116	-3.029	-1.8932	0.073784	0.48907	-4.7595	s2f_0382806001	repetin-like
s2f_0000001015	0.49613	9.9399	1.8919	0.073967	0.48996	-4.7617	OVCH1	hypothetical protein
s2f_0002505006	0.58661	3.26	1.8916	0.07401	0.48996	-4.7622	BMA-CUP-5	mucolipin-3-like
s2f_0382215001	0.84069	-1.57	1.8907	0.074131	0.49045	-4.7636	s2f_0382215001	extensin-like
s2f_0002681006	-0.48808	3.29	-1.8899	0.074255	0.49097	-4.765	DVL	segment polarity protein dishevelled homolog dvl-3 isoform x1
s2f_0483670001	-1.2562	-1.34	-1.889	0.074371	0.49112	-4.7663	s2f_0483670001	uncharacterized protein loc122255361 isoform x1
s2f_0052366001	-0.77419	0.8543	-1.889	0.074372	0.49112	-4.7663	s2f_0052366001	high-energy light unresponsive protein 1-like
s2f_0007030001	1.4732	-3.1981	1.888	0.074513	0.49153	-4.768	MAEL	protein maelstrom homolog
s2f_0006656002	0.57521	2.2207	1.8879	0.074526	0.49153	-4.7681	CG14325	hypothetical protein
s2f_0004783004	-0.63249	2.2083	-1.8875	0.074595	0.49168	-4.7689	BM5942	btb/poz domain-containing protein kctd3
s2f_0000096003	-1.061	-3.0119	-1.8868	0.074688	0.49198	-4.77	H3-1A	histone h3-like
s2f_0001175002	-0.36135	3.6451	-1.8845	0.075011	0.49355	-4.7737	ATG4D	cysteine protease atg4d
s2f_0112994001	0.43956	1.2633	1.8845	0.075019	0.49355	-4.7738	s2f_0112994001	extensin-like
s2f_0003769001	0.47766	4.1713	1.8841	0.075066	0.49355	-4.7743	s2f_0003769001	(genbank) hypothetical protein
s2f_0001903003	0.52759	4.3498	1.8831	0.075209	0.49418	-4.7759	BM6608	(genbank) uncharacterized protein
s2f_0018110001	-0.88732	-1.4031	-1.8812	0.075481	0.49567	-4.779	SI:ZFOS-1056E6.1	uncharacterized protein si:zfos-1056e6.1
s2f_0004147001	-0.40885	3.9492	-1.8809	0.075531	0.49569	-4.7796	IRC20	hypothetical protein
s2f_0000390001	-0.8138	-0.76105	-1.88	0.075648	0.49614	-4.7809	NME5	nucleoside diphosphate kinase homolog 5
s2f_0001418002	-0.47704	6.6133	-1.879	0.0758	0.4967	-4.7826	AN15G02640	transforming growth factor-beta-induced protein ig-h3-like
s2f_0000402019	0.40653	5.2534	1.8784	0.075886	0.4967	-4.7836	s2f_0000402019	zinc finger bed domain-containing protein 5-like
s2f_0003965003	-0.62614	1.2392	-1.8782	0.075912	0.4967	-4.7839	BM17999	alpha-1,3-mannosyl-glycoprotein 2-beta-n-acetylglucosaminyltransferase
s2f_0005970001	0.55466	3.8088	1.8779	0.075959	0.4967	-4.7844	CG31751	hydroxylysine kinase
s2f_0000495001	-0.26758	5.4432	-1.8778	0.075968	0.4967	-4.7845	FIG4	polyphosphoinositide phosphatase
s2f_0000305006	-0.32904	6.0715	-1.8761	0.076215	0.49801	-4.7873	BM5842	hypothetical protein
s2f_0000127011	-0.47124	3.8514	-1.8755	0.076302	0.49827	-4.7883	s2f_0000127011	retinal guanylyl cyclase 2 isoform x1
s2f_0016357001	0.69397	3.5516	1.8738	0.076549	0.49958	-4.791	CORTO	centrosomal and chromosomal factor-like
s2f_0003601002	-0.49302	3.2442	-1.8724	0.076751	0.50057	-4.7933	ESP1	hypothetical protein
s2f_0001256001	-1.3129	-3.0678	-1.8721	0.076795	0.50057	-4.7938	GPH1	hypothetical protein
s2f_0006838001	-0.33837	3.7242	-1.8714	0.076892	0.50089	-4.7949	RGS9BP	regulator of g-protein signaling 9-binding protein
s2f_0020061001	-1.1448	-2.4809	-1.8689	0.077251	0.50291	-4.7988	s2f_0020061001	potassium voltage-gated channel subfamily kqt member 1-like
s2f_0000118020	-1.0283	-3.3551	-1.8685	0.07731	0.50299	-4.7995	DSIM_GD12228	prolactin-releasing peptide receptor-like
s2f_0001248001	-0.43202	4.1237	-1.8681	0.077369	0.503	-4.8001	METAP1D	methionine aminopeptidase 1d, mitochondrial
s2f_0000987003	-0.35181	7.5903	-1.8676	0.077451	0.503	-4.801	LDH	l-lactate dehydrogenase
s2f_0381266001	0.71	-1.3381	1.8675	0.077454	0.503	-4.8011	s2f_0381266001	putative uncharacterized protein ensp00000383309
s2f_0006888001	0.34767	2.7715	1.867	0.077529	0.50306	-4.8019	BM3401	ring finger and spry domain-containing protein 1-like
s2f_0003525002	0.36421	5.8066	1.8668	0.077558	0.50306	-4.8022	ZGC:73226	bcl2/adenovirus e1b 19 kda protein-interacting protein 3-like
s2f_0003526004	0.3314	6.7536	1.866	0.077687	0.50359	-4.8036	R3HCC1	r3h and coiled-coil domain-containing protein 1
s2f_0015925001	-0.41799	1.8679	-1.8648	0.077851	0.50428	-4.8054	s2f_0015925001	(genbank) hypothetical protein
s2f_0006877002	-0.46677	4.435	-1.8646	0.077889	0.50428	-4.8059	CG16896	tbc1 domain family member 31
s2f_0380863001	1.0358	-3.0055	1.8632	0.078096	0.50531	-4.8081	s2f_0380863001	a-agglutinin anchorage subunit-like
s2f_0000797029	-0.57856	10.405	-1.8624	0.078202	0.50568	-4.8093	s2f_0000797029	u-scoloptoxin(01)-cw1a-like
s2f_0225537001	-0.83753	-1.0601	-1.8617	0.078316	0.50589	-4.8105	s2f_0225537001	uncharacterized protein loc113820724
s2f_0000080005	-0.87154	-0.25679	-1.8616	0.078329	0.50589	-4.8107	RCBTB1	rcc1 and btb domain-containing protein 1-like
s2f_0015040001	0.42164	2.0589	1.861	0.078408	0.50606	-4.8115	CG13698	(genbank) conserved hypothetical protein
s2f_0000153011	-0.47486	4.5648	-1.8608	0.078452	0.50606	-4.812	MCM2	dna replication licensing factor mcm2
s2f_0015968001	-0.62516	3.3273	-1.8601	0.078547	0.5061	-4.813	CG15478	(genbank) uncharacterized protein
s2f_0003293001	-0.30326	4.737	-1.8601	0.078553	0.5061	-4.8131	PRPF19	pre-mrna-processing factor 19
s2f_0113072001	1.2095	-3.3098	1.8592	0.078676	0.50644	-4.8144	s2f_0113072001	uncharacterized protein loc113813455
s2f_0015276001	0.39671	3.6386	1.8591	0.078702	0.50644	-4.8147	CG43861	(genbank) hypothetical protein
s2f_0144779001	-0.59562	1.3617	-1.8582	0.078824	0.50683	-4.816	s2f_0144779001	uncharacterized protein loc113813167
s2f_0057530001	-0.83662	-1.1784	-1.858	0.078858	0.50683	-4.8164	s2f_0057530001	substance-k receptor-like
s2f_0000059028	0.68393	-0.036196	1.8558	0.079192	0.50866	-4.82	CBR-CLEC-1	perlucin-like protein
s2f_0003264001	-0.92851	0.48155	-1.855	0.079311	0.50912	-4.8213	BM9870	sh2b adapter protein 1 isoform x1
s2f_0000797032	-0.45816	6.9959	-1.8539	0.079472	0.5096	-4.823	s2f_0000797032	u-scoloptoxin(01)-cw1a-like
s2f_0112954001	0.83032	0.068179	1.8535	0.079528	0.5096	-4.8236	s2f_0112954001	flocculation protein flo11-like
s2f_0086123001	1.1147	-3.4335	1.8533	0.079556	0.5096	-4.8239	s2f_0086123001	phosphatidylinositol phosphatase ptprq-like
s2f_0003238001	0.50054	2.966	1.8532	0.079579	0.5096	-4.8242	ATP6V1F	v-type proton atpase subunit f
s2f_0112886001	-0.85659	-0.1275	-1.8527	0.079644	0.50971	-4.8249	s2f_0112886001	uncharacterized protein loc108675865
s2f_0001139005	-0.43315	3.4722	-1.8519	0.079768	0.5102	-4.8262	UBXN6	ubx domain-containing protein 6
s2f_0145219001	-1.338	-0.42516	-1.8512	0.07987	0.51021	-4.8273	s2f_0145219001	uncharacterized protein loc108673161
s2f_0001692005	0.5006	4.367	1.8509	0.079922	0.51021	-4.8278	AGABI1DRAFT_67040	hypothetical protein
s2f_0200617001	-0.80189	-1.4139	-1.8507	0.079953	0.51021	-4.8282	s2f_0200617001	uncharacterized protein loc121876016
s2f_0005377001	-1.4569	-1.6818	-1.8506	0.079963	0.51021	-4.8283	GCM2	chorion-specific transcription factor gcmb
s2f_0001124005	-0.39505	2.3914	-1.8489	0.080213	0.51091	-4.8309	ACH-R	muscarinic acetylcholine receptor dm1
s2f_0109905001	-1.2609	-1.6757	-1.8489	0.080226	0.51091	-4.8311	s2f_0109905001	uncharacterized protein loc111710394
s2f_0009281001	-0.31396	4.2424	-1.8486	0.080261	0.51091	-4.8315	MTBP	mdm2-binding protein
s2f_0012757001	-0.30208	5.0684	-1.8486	0.080266	0.51091	-4.8315	CG2519	hypothetical protein
s2f_0004495001	0.69684	5.2207	1.8477	0.080399	0.51145	-4.8329	ATF3	activating transcription factor 3
s2f_0007926002	0.42943	0.36504	1.846	0.080656	0.51264	-4.8356	ZNF853	zinc finger protein 853
s2f_0006964001	-0.304	4.8094	-1.8458	0.080683	0.51264	-4.8359	BMA-SLC-25A46	solute carrier family 25 member 46-like
s2f_0000011011	0.85056	-3.6931	1.8452	0.080778	0.51293	-4.8369	CAMK2B	calcium/calmodulin-dependent protein kinase type ii subunit beta isoform x1
s2f_0382405001	-0.44524	1.6316	-1.8436	0.08102	0.51368	-4.8395	s2f_0382405001	proline-rich proteoglycan 2-like
s2f_0005807004	-0.3502	4.7947	-1.8434	0.081053	0.51368	-4.8398	SYMBB.V1.2.005804.T1	probable cysteine desulfurase
s2f_0002106004	0.43565	5.8848	1.8434	0.081054	0.51368	-4.8398	DUG1	cytosolic non-specific dipeptidase
s2f_0381767001	-1.1029	-3.7378	-1.8432	0.081089	0.51368	-4.8402	s2f_0381767001	collagen alpha-1(iii) chain-like
s2f_0008129002	-0.29734	4.4108	-1.8428	0.081143	0.51371	-4.8408	CCDC77	coiled-coil domain-containing protein 77
s2f_0008428003	-1.0749	4.5662	-1.8421	0.081255	0.51411	-4.8419	s2f_0008428003	(genbank) hypothetical protein
s2f_0004848004	-0.70519	1.4512	-1.841	0.081424	0.51466	-4.8437	DARA	rap1 gtpase-gdp dissociation stimulator 1
s2f_0381275001	-0.8592	-2.524	-1.8408	0.081453	0.51466	-4.844	s2f_0381275001	uncharacterized protein loc121860456
s2f_0002412002	-0.54026	1.8495	-1.8405	0.081487	0.51466	-4.8444	BMA-SWAN-1	ddb1- and cul4-associated factor 7
s2f_0000165016	0.58639	4.3164	1.8392	0.081696	0.51502	-4.8465	FLT1	tyrosine kinase receptor cad96ca-like
s2f_0002778004	-0.28368	3.9074	-1.8384	0.081814	0.51502	-4.8478	C09B8.4	transmembrane protein 53
s2f_0005443002	-0.32205	3.688	-1.8383	0.081835	0.51502	-4.848	TBCCD1	tbcc domain-containing protein 1
s2f_0002967002	-0.36079	3.7204	-1.8382	0.08185	0.51502	-4.8481	METTL1	trna (guanine-n(7)-)-methyltransferase
s2f_0008296001	-0.74801	1.9089	-1.838	0.081881	0.51502	-4.8485	GTDC1	glycosyltransferase-like domain-containing protein 1
s2f_0144827001	-0.63968	0.92592	-1.8377	0.081918	0.51502	-4.8488	s2f_0144827001	flocculation protein flo11-like
s2f_0057904001	-0.81912	0.84645	-1.8376	0.081931	0.51502	-4.849	s2f_0057904001	(genbank) hypothetical protein
s2f_0039015001	-0.40193	2.2502	-1.8374	0.081962	0.51502	-4.8493	s2f_0039015001	uncharacterized protein loc107363946
s2f_0219445001	1.1668	-2.0879	1.8372	0.081996	0.51502	-4.8497	s2f_0219445001	leucine-rich repeat extensin-like protein 5
s2f_0001318004	1.5241	-2.5128	1.837	0.082031	0.51502	-4.85	DLD1	hypothetical protein
s2f_0383136001	0.36253	13.164	1.8356	0.082237	0.51601	-4.8522	s2f_0383136001	uncharacterized protein loc121876248
s2f_0381381001	0.80024	7.2339	1.8352	0.082309	0.51615	-4.8529	s2f_0381381001	cytadherence high molecular weight protein 3-like
s2f_0382497001	0.57838	1.423	1.8345	0.082421	0.51655	-4.8541	s2f_0382497001	uncharacterized protein loc121870717
s2f_0006953002	-0.42687	1.6862	-1.834	0.082495	0.5167	-4.8548	ALPHA-CATR	alpha-catulin isoform x1
s2f_0005165004	0.43637	4.8765	1.8326	0.082704	0.51727	-4.857	DSIM_GD11443	tgf-beta-activated kinase 1 and map3k7-binding protein 2 isoform x1
[truncated: 8,889 more rows]

## Sheet: DEA-EXP72-K
EntrezID	logFC	logCPM	LR	PValue	adj.P.Val	Symbols	Name
[truncated: 17,945 more rows]

[truncated: 3 more sheets: DEA-EXP72-S, KEGG-POS-S, KEGG-EXP72-S]
