# Supplementary material for: A unified platform for RNA-seq analysis in non-model species
Source: Research Square preprint supplement (doi:10.21203/rs.3.rs-2187066/v1), 2022-11-08
Supplement: Supplementary file 2 [file e06ffad8149a8127232e06c0.xlsx]

## Sheet: DEA-OBS20-K
EntrezID	logFC	AveExpr	t	P.Value	adj.P.Val	B	Symbols	Name
100038777	2.2242	4.728	21.708	1.2488e-09	2.2506e-05	11.063	zgc:163022	zgc:163022
563874	-2.2555	3.9205	-18.672	5.3144e-09	4.7891e-05	10.171	si:ch211-229d2.5	si:ch211-229d2.5
100002104	-2.3466	2.1096	-15.485	3.1607e-08	0.00018988	8.9202	cbln18	cerebellin 18
541344	2.1432	7.2126	14.025	8.0481e-08	0.00029713	8.2026	prdx1	peroxiredoxin 1
100136845	-3.6267	1.4875	-13.989	8.243e-08	0.00029713	8.1837	plekhs1	"pleckstrin homology domain containing, family S member 1"
393484	3.864	4.5161	13.361	1.268e-07	0.00038088	7.8394	cyp2k18	"cytochrome P450, family 2, subfamily K, polypeptide 18"
140615	-1.7491	3.3919	-13.06	1.5691e-07	0.00040399	7.6661	fads2	fatty acid desaturase 2
562872	-1.6501	4.8668	-12.686	2.0573e-07	0.00046348	7.4431	si:dkey-4p15.5	si:dkey-4p15.5
572528	1.5951	4.4451	12.438	2.472e-07	0.0004709	7.2903	arid6	AT-rich interaction domain 6
561081	-1.5907	5.5335	-12.364	2.6128e-07	0.0004709	7.2439	si:dkey-205h13.2	si:dkey-205h13.2
678614	-1.5168	4.1808	-11.786	4.0702e-07	0.00061131	6.8687	elovl2	ELOVL fatty acid elongase 2
555481	-2.9178	2.5653	-11.565	4.8439e-07	0.00067156	6.7193	zgc:154142	zgc:154142
570453	-2.3813	1.7597	-11.374	5.6465e-07	0.00071681	6.5869	abcg2b	"ATP-binding cassette, sub-family G (WHITE), member 2b"
100137725	1.5256	3.1383	11.221	6.3941e-07	0.00071681	6.4788	cyp1c2	"cytochrome P450, family 1, subfamily C, polypeptide 2"
791218	1.8371	5.0488	11.153	6.7613e-07	0.00071681	6.4301	aifm4	apoptosis inducing factor mitochondria associated 4
559754	1.8763	2.863	10.884	8.4546e-07	0.00077795	6.2342	tmprss13a	transmembrane serine protease 13a
100526813	-1.859	2.5931	-10.859	8.6329e-07	0.00077795	6.2158	si:dkey-22f5.9	si:dkey-22f5.9
259306	-2.2238	3.7063	-10.759	9.3964e-07	0.00080643	6.141	cyp2ad2	"cytochrome P450, family 2, subfamily AD, polypeptide 2"
393997	-2.6346	0.12316	-10.665	1.0177e-06	0.00080929	6.0703	lipca	"lipase, hepatic a"
100124622	2.9813	3.5051	10.648	1.0328e-06	0.00080929	6.0573	100124622	NA
571762	1.5641	6.8342	10.5	1.1729e-06	0.00088078	5.9442	si:dkey-9l20.3	si:dkey-9l20.3
565454	-1.6904	3.3135	-10.443	1.232e-06	0.00088819	5.9003	si:ch211-153b23.3	si:ch211-153b23.3
79381	2.0242	9.4177	9.9744	1.8672e-06	0.0012225	5.5264	gstp1	glutathione S-transferase pi 1
553479	-2.603	2.1008	-9.9556	1.8992e-06	0.0012225	5.511	krt18a.2	"keratin 18a, tandem duplicate 2"
402945	1.8593	6.9913	9.4421	3.0547e-06	0.0018214	5.0771	dhrs13l1	dehydrogenase/reductase (SDR family) member 13 like 1
566658	2.4096	7.7506	9.4154	3.1329e-06	0.0018214	5.0538	tcnbb	transcobalamin beta b
560649	-1.8293	4.436	-9.1945	3.8705e-06	0.0020517	4.8586	si:ch211-214p16.3	si:ch211-214p16.3
567406	-5.6497	-1.303	-9.0518	4.4469e-06	0.0022899	4.7298	ahsg2	alpha-2-HS-glycoprotein 2
368352	1.7117	7.1357	9.0075	4.6443e-06	0.0023251	4.6894	cyp2y3	"cytochrome P450, family 2, subfamily Y, polypeptide 3"
558919	1.8221	6.8881	8.8945	5.193e-06	0.0024288	4.5853	col10a1a	"collagen, type X, alpha 1a"
140634	1.5267	7.3484	8.8824	5.2556e-06	0.0024288	4.5742	cyp1a	"cytochrome P450, family 1, subfamily A"
555334	-2.3431	0.86293	-8.5575	7.294e-06	0.0029836	4.2668	itln3	intelectin 3
386968	-1.7323	2.9873	-8.5037	7.7077e-06	0.0029836	4.2148	calcoco1b	calcium binding and coiled-coil domain 1b
100004272	-1.805	2.4275	-8.4946	7.7806e-06	0.0029836	4.2059	slc15a1a	solute carrier family 15 member 1a
565535	-2.0521	3.0068	-8.3087	9.437e-06	0.0032594	4.0234	mep1a.2	"meprin A, alpha (PABA peptide hydrolase), tandem duplicate 2"
100006366	1.5753	2.8776	8.2609	9.9226e-06	0.0032594	3.9759	col5a2b	"collagen, type V, alpha 2b"
550580	1.6228	5.7659	8.251	1.0027e-05	0.0032594	3.966	sqor	sulfide quinone oxidoreductase
100000156	3.6947	3.7047	8.1534	1.1118e-05	0.0034548	3.8678	si:zfos-411a11.2	si:zfos-411a11.2
792467	-3.0437	1.6114	-8.1002	1.1766e-05	0.0035941	3.8139	si:ch211-270n8.1	si:ch211-270n8.1
564815	-1.8641	1.0364	-8.026	1.274e-05	0.0038269	3.7381	slc5a9	solute carrier family 5 member 9
567780	-1.709	0.60892	-7.9714	1.3513e-05	0.0039924	3.6818	kcnv2b	"potassium channel, subfamily V, member 2b"
565942	-1.996	3.5083	-7.933	1.4087e-05	0.0040949	3.6421	meltf	melanotransferrin
555617	1.7333	4.2787	7.9015	1.4577e-05	0.00417	3.6094	enam	enamelin
569558	-2.6209	-1.0239	-7.7594	1.7034e-05	0.004625	3.4601	ahsg1	alpha-2-HS-glycoprotein 1
447891	-1.5083	2.4708	-7.7509	1.7193e-05	0.004625	3.4511	sc5d	sterol-C5-desaturase
566996	2.3673	4.9003	7.7331	1.7535e-05	0.0046475	3.4322	si:dkey-11k2.7	si:dkey-11k2.7
100330921	-1.6404	1.1293	-7.6959	1.8273e-05	0.0047347	3.3926	si:ch211-103a14.5	si:ch211-103a14.5
553169	1.9921	6.093	7.6902	1.8389e-05	0.0047347	3.3865	gstp2	glutathione S-transferase pi 2
571461	-2.5945	0.15643	-7.6703	1.8802e-05	0.0047502	3.3652	sult3st3	"sulfotransferase family 3, cytosolic sulfotransferase 3"
334459	-1.8908	3.5078	-7.6245	1.9786e-05	0.004885	3.3161	si:ch211-113d11.5	si:ch211-113d11.5
100270763	4.1478	2.241	7.3681	2.645e-05	0.0057983	3.0358	scpp9	secretory calcium-binding phosphoprotein 9
322482	-1.8982	-1.8829	-7.3453	2.7151e-05	0.0058255	3.0105	adh8a	alcohol dehydrogenase 8a
793783	2.3331	4.2503	7.2702	2.9605e-05	0.0062044	2.9266	ankrd37	ankyrin repeat domain 37
568707	-1.6948	5.8703	-7.2601	2.9952e-05	0.0062048	2.9153	afp4	antifreeze protein type IV
568094	-1.5964	0.9635	-7.1126	3.5578e-05	0.0070463	2.748	comtd1	catechol-O-methyltransferase domain containing 1
791732	-2.332	1.9392	-7.0954	3.6307e-05	0.0070495	2.7283	sult1st2	"sulfotransferase family 1, cytosolic sulfotransferase 2"
619259	3.5936	-2.1859	7.0085	4.0234e-05	0.0074757	2.6282	dao.1	"D-amino-acid oxidase, tandem duplicate 1"
101884317	-1.7057	1.8613	-6.9795	4.1645e-05	0.0075779	2.5946	si:ch73-261i21.5	si:ch73-261i21.5
560023	-3.3408	0.34422	-6.9715	4.2046e-05	0.0075779	2.5852	LOC560023	trypsin I-P1-like
100005645	-2.1166	0.79313	-6.945	4.3397e-05	0.007744	2.5543	fam151a	family with sequence similarity 151 member A
368270	-1.7985	2.242	-6.888	4.6463e-05	0.0081612	2.4876	sult1st3	"sulfotransferase family 1, cytosolic sulfotransferase 3"
100004607	-2.1632	3.166	-6.8772	4.7074e-05	0.0081612	2.4749	apoa4b.3	"apolipoprotein A-IV b, tandem duplicate 3"
406602	2.1928	5.1377	6.6414	6.2725e-05	0.0098303	2.1936	egln3	egl-9 family hypoxia-inducible factor 3
100320899	-3.5597	-3.9931	-6.6169	6.4647e-05	0.010044	2.164	si:dkeyp-75b4.10	si:dkeyp-75b4.10
571967	-3.314	0.78175	-6.5665	6.8815e-05	0.01035	2.1026	ido1	"indoleamine 2,3-dioxygenase 1"
641419	-1.7177	0.7808	-6.5403	7.1095e-05	0.010503	2.0705	slc16a7	solute carrier family 16 member 7
563642	-1.6364	2.6008	-6.3655	8.8541e-05	0.012353	1.8544	sdsl	serine dehydratase-like
100332150	2.9239	-2.6585	6.3606	8.9099e-05	0.012353	1.8482	si:ch211-217i17.1	si:ch211-217i17.1
449685	-1.7787	2.111	-6.2325	0.00010492	0.014007	1.6868	zgc:136410	zgc:136410
326030	-1.5427	3.3416	-6.0891	0.0001263	0.015492	1.5033	slc6a19b	solute carrier family 6 member 19b
101882741	-2.6222	-4.3596	-6.0385	0.00013493	0.015999	1.4378	spink2.3	"serine peptidase inhibitor, Kazal type 2, tandem duplicate 3"
503524	1.7562	2.2863	6.0236	0.0001376	0.016	1.4184	zgc:113142	zgc:113142
100537110	-1.6982	0.20036	-5.9039	0.00016116	0.017555	1.2615	si:dkey-42l23.7	si:dkey-42l23.7
494573	-3.3934	0.052259	-5.8791	0.00016656	0.017562	1.2288	guca1d	guanylate cyclase activator 1d
557256	3.0566	1.3752	5.7446	0.00019947	0.019753	1.0495	vwa10.1	"von Willebrand factor A domain containing 10, tandem duplicate 1"
560651	-1.7496	2.4118	-5.723	0.00020537	0.020172	1.0205	ces3	carboxylesterase 3
327586	-1.56	3.7579	-5.7077	0.00020969	0.020172	0.99977	si:ch73-40a17.3	si:ch73-40a17.3
556854	3.7736	-1.4748	5.7069	0.00020991	0.020172	0.99873	tor1l2	torsin family 1 like 2
393556	1.5383	5.7038	5.6938	0.00021369	0.02023	0.98099	gstt1b	glutathione S-transferase theta 1b
100003900	1.7242	0.6225	5.683	0.00021683	0.02023	0.96643	chia.5	"chitinase, acidic.5"
767756	1.5861	3.6249	5.6642	0.00022243	0.020261	0.94106	ugt5a2	"UDP glucuronosyltransferase 5 family, polypeptide A2"
567275	1.5813	8.1491	5.6415	0.00022945	0.020261	0.91011	mgst3b	microsomal glutathione S-transferase 3b
794675	-1.7888	1.6288	-5.6311	0.00023271	0.020261	0.89605	si:ch73-306e8.2	si:ch73-306e8.2
797166	-1.7599	1.2718	-5.601	0.00024249	0.021012	0.85501	si:dkey-11o18.5	si:dkey-11o18.5
100170833	1.6326	2.5609	5.5259	0.00026889	0.022129	0.75195	fthl29	"ferritin, heavy polypeptide-like 29"
100535144	2.5396	-0.030788	5.5167	0.00027229	0.0223	0.73941	LOC100535144	von Willebrand factor A domain-containing protein 7-like
550402	1.6727	1.7459	5.5057	0.00027648	0.022345	0.72419	arf4b	ADP-ribosylation factor 4b
100001777	2.1716	-1.552	5.4088	0.00031637	0.024483	0.58965	cfap73	cilia and flagella associated protein 73
100137128	-1.6602	0.071667	-5.3889	0.00032529	0.024737	0.56186	hbl4	hexose-binding lectin 4
557261	1.5295	-1.384	5.2955	0.00037093	0.026867	0.43065	si:ch211-122l24.6	si:ch211-122l24.6
555281	-1.8116	1.153	-5.2883	0.00037472	0.026867	0.4205	zgc:158432	zgc:158432
100322075	1.667	-0.40624	5.281	0.00037864	0.026867	0.41008	adm2b	adrenomedullin 2b
100137108	1.5609	5.2431	5.1756	0.00043989	0.029583	0.2601	hspb9	"heat shock protein, alpha-crystallin-related, 9"
560974	-2.2638	-3.3823	-5.1559	0.00045244	0.03009	0.23194	si:ch211-113a14.29	si:ch211-113a14.29
103911752	2.4593	-4.4587	5.148	0.00045764	0.030212	0.22051	LOC103911752	uncharacterized LOC103911752
336485	1.7161	1.3872	5.1117	0.00048214	0.031383	0.1683	jac1	jacalin 1
791526	2.0888	1.2929	5.0089	0.00055942	0.034556	0.019395	prl	prolactin
445326	-1.5592	0.092005	-4.9961	0.00056997	0.034556	0.00067138	akr1a1a	"aldo-keto reductase family 1, member A1a (aldehyde reductase)"
790965	-4.4435	-1.6228	-4.9309	0.00062688	0.036793	-0.094701	si:dkey-286h2.3	si:dkey-286h2.3
100002476	1.5921	2.7056	4.9204	0.00063664	0.036972	-0.11018	si:ch211-125e6.5	si:ch211-125e6.5
431734	-2.0517	-0.09521	-4.827	0.00073058	0.040022	-0.24819	cyp2x8	"cytochrome P450, family 2, subfamily X, polypeptide 8"
619243	-1.6426	-0.2131	-4.7803	0.00078292	0.04138	-0.31759	sult3st4	"sulfotransferase family 3, cytosolic sulfotransferase 4"
105665604	-1.855	-4.6834	-4.7137	0.00086472	0.043291	-0.41727	105665604	NA
101886259	1.8417	-1.1088	4.656	0.00094296	0.046294	-0.50418	si:ch211-11n16.3	si:ch211-11n16.3
100535203	1.778	0.78091	4.6366	0.00097092	0.046914	-0.53351	si:ch211-202h22.7	si:ch211-202h22.7
557181	-2.2625	-3.9063	-4.5853	0.0010491	0.049759	-0.61125	alg13	ALG13 UDP-N-acetylglucosaminyltransferase subunit
553637	1.4048	5.5361	12.224	2.9038e-07	0.00047578	7.1552	553637	NA
568625	-1.4568	3.2005	-11.155	6.7515e-07	0.00071681	6.4314	si:dkeyp-110c7.4	si:dkeyp-110c7.4
553688	1.1058	5.6122	10.968	7.8799e-07	0.00077795	6.2961	bach1b	"BTB and CNC homology 1, basic leucine zipper transcription factor 1 b"
321195	-1.3741	7.3424	-10.355	1.3308e-06	0.0009225	5.8313	serpina1l	"serine (or cysteine) proteinase inhibitor, clade A (alpha-1 antiproteinase, antitrypsin), member 1, like"
393561	1.3941	7.1585	9.6552	2.5017e-06	0.0015547	5.2602	abcc2	"ATP-binding cassette, sub-family C (CFTR/MRP), member 2"
245951	-1.0354	2.7896	-9.3788	3.2437e-06	0.0018269	5.0218	ros1	"c-ros oncogene 1 , receptor tyrosine kinase"
569489	-1.4257	7.7649	-9.2261	3.7541e-06	0.0020503	4.8869	fetub	fetuin B
322415	-1.4218	1.3725	-8.9143	5.0919e-06	0.0024288	4.6037	sult3st2	"sulfotransferase family 3, cytosolic sulfotransferase 2"
436651	1.1697	7.5374	8.8344	5.5131e-06	0.002484	4.5295	fthl27	"ferritin, heavy polypeptide-like 27"
406537	-1.2271	5.3945	-8.6191	6.8492e-06	0.0029836	4.326	slc13a2	solute carrier family 13 member 2
559107	-1.4308	2.4946	-8.5888	7.0642e-06	0.0029836	4.2969	LOC559107	lactase-phlorizin hydrolase
553575	1.4033	5.6689	8.5559	7.3057e-06	0.0029836	4.2653	gsr	glutathione reductase
799528	-1.2647	2.9413	-8.5304	7.4991e-06	0.0029836	4.2407	sqlea	squalene epoxidase a
100873093	1.1782	4.0833	8.3407	9.1265e-06	0.0032594	4.0551	nfe2l2b	"nuclear factor, erythroid 2-like 2b"
556193	1.0041	1.5455	8.3148	9.3776e-06	0.0032594	4.0294	sgms2a	sphingomyelin synthase 2a
406662	-1.4581	4.8998	-8.2924	9.5995e-06	0.0032594	4.0072	msmo1	methylsterol monooxygenase 1
570101	1.2685	1.6617	8.2415	1.0127e-05	0.0032594	3.9565	zgc:173570	zgc:173570
100004946	0.92602	5.3883	8.27	9.8284e-06	0.0032594	3.9849	trpm4a	"transient receptor potential cation channel, subfamily M, member 4a"
562092	0.7949	4.4653	8.2452	1.0088e-05	0.0032594	3.9601	vgll4l	vestigial like 4 like
415192	-1.3418	3.4992	-8.2003	1.0578e-05	0.0033447	3.9151	pnp4a	purine nucleoside phosphorylase 4a
563729	-1.0966	3.532	-7.855	1.5336e-05	0.0042523	3.5608	samd7	sterile alpha motif domain containing 7
394060	-0.96199	6.4232	-7.8653	1.5163e-05	0.0042523	3.5716	hmgcs1	3-hydroxy-3-methylglutaryl-CoA synthase 1 (soluble)
192340	-0.8545	6.544	-7.6619	1.8977e-05	0.0047502	3.3563	scarb2a	"scavenger receptor class B, member 2a"
559054	-1.0877	4.9506	-7.6022	2.0286e-05	0.0049048	3.292	hmgcra	3-hydroxy-3-methylglutaryl-CoA reductase a
568482	1.3874	5.3857	7.5968	2.041e-05	0.0049048	3.2862	abcc12	"ATP-binding cassette, sub-family C (CFTR/MRP), member 12"
795400	-1.0321	2.5691	-7.521	2.2226e-05	0.0052707	3.204	lss	"lanosterol synthase (2,3-oxidosqualene-lanosterol cyclase)"
100144569	-0.67341	3.8318	-7.4657	2.3662e-05	0.0055384	3.1435	dpys	dihydropyrimidinase
445091	0.92506	4.7915	7.4438	2.4258e-05	0.0056052	3.1195	capn2l	"calpain 2, (m/II) large subunit, like"
436823	1.3196	4.106	7.3963	2.5609e-05	0.0057983	3.0671	pir	pirin
116991	1.3691	6.0571	7.3636	2.6586e-05	0.0057983	3.0308	ugdh	UDP-glucose 6-dehydrogenase
101883146	1.4527	3.4452	7.3627	2.6611e-05	0.0057983	3.0299	ppp1r3aa	"protein phosphatase 1, regulatory subunit 3Aa"
692332	0.78806	3.0072	7.3598	2.6703e-05	0.0057983	3.0266	cyp46a1.3	"cytochrome P450, family 46, subfamily A, polypeptide 1, tandem duplicate 3"
100003675	1.3426	4.6167	7.2719	2.9548e-05	0.0062044	2.9285	p4ha1b	"prolyl 4-hydroxylase, alpha polypeptide I b"
571647	0.91555	-0.19539	7.2282	3.1084e-05	0.0063662	2.8793	mhc1zja	major histocompatibility complex class I ZJA
563665	-1.0376	4.1354	-7.2123	3.1663e-05	0.006412	2.8613	c3b.1	"complement component c3b, tandem duplicate 1"
100384900	1.3489	5.1453	7.1756	3.3045e-05	0.0066175	2.8198	ugt2a3	"UDP glucuronosyltransferase 2 family, polypeptide A3"
550369	-0.99223	3.2548	-7.0938	3.6376e-05	0.0070495	2.7264	nsdhl	NAD(P) dependent steroid dehydrogenase-like
436600	-1.0078	3.3817	-7.0399	3.8765e-05	0.007389	2.6645	ebp	EBP cholestenol delta-isomerase
405843	1.0549	3.4226	7.0282	3.9303e-05	0.007389	2.651	foxq1b	forkhead box Q1b
406452	1.1754	6.7675	7.0271	3.9358e-05	0.007389	2.6496	sqstm1	sequestosome 1
566465	-1.3817	4.8161	-6.9958	4.0847e-05	0.0075122	2.6134	apoba	apolipoprotein Ba
569714	-1.1202	5.4646	-6.8768	4.7094e-05	0.0081612	2.4745	apom	apolipoprotein M
393167	0.82759	6.7391	6.864	4.7826e-05	0.0082092	2.4594	hebp2	heme binding protein 2
560277	-1.3056	1.8059	-6.851	4.8581e-05	0.0082602	2.4441	masp2	mannan-binding lectin serine peptidase 2
791200	-1.3742	1.0705	-6.8216	5.0335e-05	0.0084784	2.4094	lrrc15	leucine rich repeat containing 15
562051	-0.93159	2.5838	-6.7778	5.3085e-05	0.0088589	2.3573	tmprss9	transmembrane serine protease 9
394148	-1.1721	4.2592	-6.7223	5.68e-05	0.0093918	2.291	cyp7a1	"cytochrome P450, family 7, subfamily A, polypeptide 1"
561520	0.86428	3.2901	6.7139	5.7385e-05	0.0094024	2.2809	fam83e	family with sequence similarity 83 member E
394007	-1.2191	2.489	-6.7042	5.807e-05	0.0094288	2.2693	xpnpep2	"X-prolyl aminopeptidase (aminopeptidase P) 2, membrane-bound"
565074	-1.1568	4.1351	-6.6895	5.9127e-05	0.0095147	2.2516	c3a.3	"complement component c3a, duplicate 3"
558731	-0.85918	2.9778	-6.6584	6.1427e-05	0.0097974	2.2142	si:dkey-30c15.13	si:dkey-30c15.13
353358	-1.084	6.0009	-6.6508	6.2002e-05	0.0098022	2.205	anxa1b	annexin A1b
557029	1.0029	2.5862	6.5905	6.6797e-05	0.010202	2.1319	zgc:158404	zgc:158404
447865	0.80582	5.0058	6.5953	6.64e-05	0.010202	2.1377	vwa5a	von Willebrand factor A domain containing 5A
555921	-0.75274	4.5622	-6.5654	6.8913e-05	0.01035	2.1012	kcnb2	"potassium voltage-gated channel, Shab-related subfamily, member 2"
321837	1.1215	4.7494	6.5521	7.0055e-05	0.010435	2.085	keap1a	kelch-like ECH-associated protein 1a
437013	0.71816	6.9032	6.527	7.2282e-05	0.010591	2.0543	eef2k	eukaryotic elongation factor 2 kinase
570579	0.61615	6.1612	6.4944	7.5285e-05	0.010942	2.0142	g6pd	glucose-6-phosphate dehydrogenase
445125	0.75599	3.648	6.4774	7.6897e-05	0.011087	1.9933	pltp	phospholipid transfer protein
321046	-0.84939	6.5224	-6.4622	7.8381e-05	0.011212	1.9745	c3a.1	"complement component c3a, duplicate 1"
556190	0.75833	5.0492	6.4493	7.9658e-05	0.011305	1.9586	pfkfb4a	"6-phosphofructo-2-kinase/fructose-2,6-biphosphatase 4a"
414331	-0.83654	5.738	-6.4113	8.3565e-05	0.011766	1.9114	cyp51	"cytochrome P450, family 51"
100003679	0.85625	5.5456	6.3452	9.0859e-05	0.0125	1.8289	keap1b	kelch-like ECH-associated protein 1b
563353	1.3044	2.6953	6.3132	9.4632e-05	0.012921	1.7887	si:ch211-106n13.3	si:ch211-106n13.3
101882127	-1.1651	2.4138	-6.2419	0.00010366	0.014007	1.6988	asgrl2	asialoglycoprotein receptor-like 2
445201	0.77718	6.4457	6.2339	0.00010473	0.014007	1.6886	cant1b	calcium activated nucleotidase 1b
559844	1.1955	1.1815	6.1737	0.00011317	0.014781	1.6119	dhrs13b.2	dehydrogenase/reductase (SDR family) member 13b.2
335732	-0.71007	5.3807	-6.1824	0.00011191	0.014781	1.623	elovl4b	ELOVL fatty acid elongase 4b
560440	0.96963	2.5978	6.1789	0.00011242	0.014781	1.6186	si:ch211-210p4.6	si:ch211-210p4.6
108179231	-1.0116	5.3315	-6.1462	0.00011728	0.015142	1.5766	LOC108179231	alpha-2-macroglobulin-like
566852	-1.1243	2.2624	-6.1439	0.00011762	0.015142	1.5738	pdzd3b	PDZ domain containing 3b
566120	-0.67601	6.726	-6.137	0.00011869	0.015171	1.5648	grk7a	G protein-coupled receptor kinase 7a
562682	1.0911	5.4966	6.1007	0.00012441	0.015492	1.5182	si:dkey-251i10.2	si:dkey-251i10.2
100330987	1.0973	5.3264	6.0763	0.00012844	0.015492	1.4866	si:ch1073-281m9.1	si:ch1073-281m9.1
474328	-0.77311	2.6858	-6.1104	0.00012285	0.015492	1.5307	crygm5	"crystallin, gamma M5"
30197	0.99212	1.8982	6.1099	0.00012293	0.015492	1.5301	dkk1b	dickkopf WNT signaling pathway inhibitor 1b
566865	-0.84814	4.0481	-6.0929	0.00012568	0.015492	1.5082	sec14l7	SEC14-like lipid binding 7
101884333	0.80049	3.2836	6.0854	0.00012692	0.015492	1.4984	si:dkey-165e24.1	si:dkey-165e24.1
560551	0.69628	2.0833	6.0804	0.00012774	0.015492	1.492	wu:fa19b12	wu:fa19b12
678618	0.67283	2.9872	6.0733	0.00012893	0.015492	1.4828	avil	advillin
402940	-1.1761	5.1475	-6.0481	0.00013326	0.015905	1.4502	pnp4b	purine nucleoside phosphorylase 4b
565078	-0.97223	2.6998	-6.0309	0.00013629	0.016	1.4278	si:dkey-33m11.8	si:dkey-33m11.8
557762	-0.85571	2.439	-6.0249	0.00013736	0.016	1.4201	slc16a12a	solute carrier family 16 member 12a
322493	-0.94125	3.8092	-6.0182	0.00013857	0.01601	1.4114	slc2a2	solute carrier family 2 member 2
100334344	1.0059	8.3957	6.0018	0.0001416	0.016153	1.3899	si:ch211-195b11.3	si:ch211-195b11.3
436868	0.79953	4.9189	6.0019	0.00014157	0.016153	1.3901	egln1b	egl-9 family hypoxia-inducible factor 1b
571738	-0.96434	2.5737	-5.9875	0.00014428	0.016355	1.3713	pla2g1b	"phospholipase A2, group IB (pancreas)"
326857	0.64016	6.0118	5.9495	0.00015171	0.01709	1.3215	gclc	"glutamate-cysteine ligase, catalytic subunit"
406421	-0.60413	4.4142	-5.938	0.00015402	0.017242	1.3065	acox3	"acyl-CoA oxidase 3, pristanoyl"
378446	-0.75183	4.7606	-5.9231	0.00015711	0.01742	1.2868	dhcr7	7-dehydrocholesterol reductase
60640	0.82809	3.1164	5.921	0.00015755	0.01742	1.2841	cyp19a1b	"cytochrome P450, family 19, subfamily A, polypeptide 1b"
565702	-0.7866	2.9319	-5.9132	0.00015919	0.017494	1.2738	cnnm2b	cyclin and CBS domain divalent metal cation transport mediator 2b
378438	1.113	6.1039	5.9014	0.00016169	0.017555	1.2583	selenow2b	"selenoprotein W, 2b"
767730	1.1159	5.4771	5.8945	0.00016317	0.017562	1.2492	rnf183	ring finger protein 183
58148	-1.1589	3.5927	-5.8729	0.00016795	0.017562	1.2206	slc34a2a	solute carrier family 34 member 2a
558851	-1.3052	3.7335	-5.8658	0.00016955	0.017562	1.2111	cyp4v8	"cytochrome P450, family 4, subfamily V, polypeptide 8"
322372	0.92951	4.8085	5.8893	0.00016432	0.017562	1.2422	fah	fumarylacetoacetate hydrolase (fumarylacetoacetase)
553655	0.71921	7.5284	5.8763	0.00016718	0.017562	1.2251	pygma	"phosphorylase, glycogen, muscle A"
100534918	0.73341	5.4272	5.8733	0.00016785	0.017562	1.2211	si:ch73-74h11.1	si:ch73-74h11.1
557507	0.89385	6.0092	5.8688	0.00016886	0.017562	1.2152	aifm2	apoptosis inducing factor mitochondria associated 2
566323	0.66867	6.4302	5.8528	0.0001725	0.017765	1.194	qdpra	quinoid dihydropteridine reductase a
84702	-1.1859	4.704	-5.8409	0.00017528	0.017848	1.1781	cp	ceruloplasmin
393311	1.0712	4.1833	5.8408	0.00017528	0.017848	1.1781	plekhf1	"pleckstrin homology domain containing, family F (with FYVE domain) member 1"
504039	1.1575	5.4472	5.821	0.00017999	0.018225	1.1517	im:7150988	im:7150988
404035	0.97285	2.9563	5.7757	0.00019128	0.01926	1.0912	traf4b	tnf receptor-associated factor 4b
393665	0.85941	6.7565	5.7692	0.00019296	0.019321	1.0825	ndrg1b	N-myc downstream regulated 1b
570991	1.3559	4.3757	5.7535	0.0001971	0.019627	1.0614	si:ch1073-340i21.3	si:ch1073-340i21.3
494054	-0.98493	3.1153	-5.7131	0.00020816	0.020172	1.0071	tm7sf2	transmembrane 7 superfamily member 2
494083	-0.73781	3.0577	-5.71	0.00020903	0.020172	1.0029	mogat3b	monoacylglycerol O-acyltransferase 3b
327288	-0.72732	5.8312	-5.7051	0.00021042	0.020172	0.99633	cndp2	carnosine dipeptidase 2
568032	-1.3694	6.717	-5.6763	0.00021881	0.02023	0.9574	rbp2a	"retinol binding protein 2a, cellular"
562762	-1.1105	1.8334	-5.6761	0.00021888	0.02023	0.95705	slc39a4	solute carrier family 39 member 4
568750	0.58145	1.9534	5.6927	0.000214	0.02023	0.97951	trim108	tripartite motif containing 108
565606	0.93568	2.5973	5.6811	0.00021739	0.02023	0.96385	ptpn22	protein tyrosine phosphatase non-receptor type 22
333938	0.49749	7.2942	5.6783	0.0002182	0.02023	0.96016	myh9a	"myosin, heavy chain 9a, non-muscle"
494158	1.4248	4.9095	5.6613	0.00022333	0.020261	0.93701	anxa1c	annexin A1c
100151256	1.2779	4.5184	5.6555	0.00022509	0.020261	0.9292	cmbl	carboxymethylenebutenolidase homolog (Pseudomonas)
553353	1.484	5.387	5.6379	0.00023056	0.020261	0.90529	si:ch211-202f3.3	si:ch211-202f3.3
563265	1.2609	4.364	5.6354	0.00023135	0.020261	0.90188	si:dkey-34l15.1	si:dkey-34l15.1
557756	-1.4071	3.4027	-5.6317	0.00023251	0.020261	0.89691	enpp7.1	"ectonucleotide pyrophosphatase/phosphodiesterase 7, tandem duplicate 1"
100151335	-1.2548	0.11702	-5.6314	0.00023261	0.020261	0.89646	LOC100151335	PI-PLC X domain-containing protein 1-like
402831	-0.55257	4.5191	-5.6545	0.0002254	0.020261	0.92782	cyp27a7	"cytochrome P450, family 27, subfamily A, polypeptide 7"
405757	0.80674	5.7283	5.6478	0.00022747	0.020261	0.91873	oclna	occludin a
83780	-0.54113	5.5853	-5.6393	0.00023011	0.020261	0.90721	cry3b	cryptochrome circadian regulator 3b
323465	0.76034	6.694	5.593	0.00024518	0.021058	0.84403	vcanb	versican b
565728	0.99588	3.9747	5.5924	0.00024536	0.021058	0.84327	rabgap1l2	RAB GTPase activating protein 1-like 2
793448	-0.83285	3.6677	-5.5793	0.0002498	0.021337	0.82539	tgm1l3	transglutaminase 1 like 3
503788	-1.0346	2.35	-5.5687	0.00025348	0.02155	0.8108	slc13a5a	solute carrier family 13 member 5a
405865	0.99979	4.9848	5.5555	0.00025811	0.02184	0.79276	ethe1	ETHE1 persulfide dioxygenase
445287	0.80159	6.4307	5.5471	0.00026113	0.021993	0.78115	hpdb	4-hydroxyphenylpyruvate dioxygenase b
100616532	-1.27	3.2885	-5.5263	0.00026871	0.022129	0.75263	npc1l1	NPC1-like 1
30273	0.71327	3.6902	5.5343	0.00026576	0.022129	0.76365	snai1a	snail family zinc finger 1a
110437892	-0.68454	4.2349	-5.5343	0.00026576	0.022129	0.76364	LOC110437892	uncharacterized LOC110437892
378983	0.58529	5.8126	5.5277	0.00026822	0.022129	0.75444	postna	"periostin, osteoblast specific factor a"
436919	-0.80228	6.7507	-5.5111	0.00027443	0.0223	0.73163	ada	adenosine deaminase
337325	-0.93016	5.9593	-5.5104	0.00027468	0.0223	0.73069	pdzk1	PDZ domain containing 1
100333914	-0.57835	3.7536	-5.4992	0.00027897	0.022446	0.71525	ccl25a	chemokine (C-C motif) ligand 25a
405886	1.4072	1.0774	5.4804	0.00028635	0.022937	0.68918	pth1a	parathyroid hormone 1a
550524	-0.67579	4.2852	-5.4689	0.00029096	0.023203	0.67325	cbsa	cystathionine beta-synthase a
100000322	1.4608	4.396	5.4573	0.00029569	0.023374	0.65714	trpv6	"transient receptor potential cation channel, subfamily V, member 6"
793563	0.64382	2.0328	5.4574	0.00029562	0.023374	0.65738	maats1	"MYCBP-associated, testis expressed 1"
323834	-1.0701	3.1532	-5.4315	0.00030648	0.024064	0.62136	dusp23a	dual specificity phosphatase 23a
564474	-0.83267	3.7292	-5.4301	0.0003071	0.024064	0.61935	slc1a8b	solute carrier family 1 member 8b
353221	1.4846	2.5176	5.4075	0.00031695	0.024483	0.58782	pomca	proopiomelanocortin a
562480	-1.1326	1.6994	-5.4059	0.00031764	0.024483	0.58563	si:dkey-72l14.3	si:dkey-72l14.3
373126	0.72595	5.1286	5.4044	0.00031832	0.024483	0.58352	hif1an	hypoxia inducible factor 1 subunit alpha inhibitor
100535608	-0.67101	2.5662	-5.4023	0.00031923	0.024483	0.58065	sh3tc1	SH3 domain and tetratricopeptide repeats 1
565774	-0.84211	3.447	-5.3973	0.00032147	0.02455	0.57367	c5	complement component 5
447810	0.89839	4.7657	5.3824	0.00032827	0.024859	0.55275	nt5c2l1	"5'-nucleotidase, cytosolic II, like 1"
405800	-0.99362	2.8511	-5.376	0.00033119	0.024975	0.54391	dao.2	"D-amino-acid oxidase, tandem duplicate 2"
100002182	-1.3219	2.4157	-5.3667	0.00033555	0.025199	0.53084	si:ch73-281k2.5	si:ch73-281k2.5
84041	-1.3131	1.0308	-5.3593	0.00033905	0.025356	0.52047	bco2l	"beta-carotene 15, 15-dioxygenase 2, like"
555251	-0.64405	4.5745	-5.3547	0.00034124	0.025408	0.51404	inaa	"internexin neuronal intermediate filament protein, alpha a"
571547	-0.87608	4.1656	-5.352	0.00034258	0.025408	0.51014	ogal	O-GlcNAcase like
393364	0.84065	5.1135	5.3486	0.00034418	0.025423	0.50546	ildr1a	immunoglobulin-like domain containing receptor 1a
100004856	-0.81166	2.147	-5.3211	0.00035779	0.02632	0.46672	si:ch211-137i24.12	si:ch211-137i24.12
447803	0.95534	4.1592	5.315	0.00036085	0.026438	0.45819	pon1	paraoxonase 1
613141	-1.3325	3.0985	-5.3109	0.00036294	0.026483	0.45243	itih3b	inter-alpha-trypsin inhibitor heavy chain 3b
557568	-1.0662	2.5501	-5.2846	0.0003767	0.026867	0.41523	ankrd33aa	ankyrin repeat domain 33Aa
564872	-0.77461	3.4447	-5.2917	0.00037294	0.026867	0.42525	564872	NA
494075	0.72557	5.1871	5.287	0.00037542	0.026867	0.41864	oclnb	occludin b
792389	0.90693	1.394	5.2826	0.00037776	0.026867	0.41242	si:ch73-78o10.1	si:ch73-78o10.1
100536500	1.3661	4.3631	5.2711	0.00038395	0.027137	0.39616	LOC100536500	cysteine-rich venom protein natrin-1-like
560808	-1.2949	-0.60037	-5.2678	0.00038575	0.027158	0.39149	htr2aa	"5-hydroxytryptamine (serotonin) receptor 2A, genome duplicate a"
100005128	1.0555	4.2034	5.2619	0.00038902	0.027176	0.38304	si:dkey-239b22.2	si:dkey-239b22.2
777630	0.66916	4.6141	5.264	0.00038786	0.027176	0.38604	tmprss4a	transmembrane serine protease 4a
559018	-0.94033	3.5951	-5.2485	0.00039649	0.027591	0.36401	clul1	clusterin-like 1 (retinal)
321166	-1.067	9.027	-5.2342	0.00040459	0.028046	0.34379	apobb.1	"apolipoprotein Bb, tandem duplicate 1"
550497	0.92802	4.6596	5.2127	0.00041718	0.028808	0.31313	zgc:110333	zgc:110333
553066	-0.58585	4.1774	-5.2072	0.00042048	0.028925	0.30526	pyroxd2	pyridine nucleotide-disulphide oxidoreductase domain 2
544667	0.71803	3.5626	5.1991	0.00042533	0.029148	0.29377	flt1	fms-related tyrosine kinase 1 (vascular endothelial growth factor/vascular permeability factor receptor)
436872	-1.2523	3.2578	-5.1949	0.00042794	0.029215	0.28766	sult1st6	"sulfotransferase family 1, cytosolic sulfotransferase 6"
556186	0.71264	7.2075	5.1867	0.00043297	0.029447	0.27596	nt5dc2	5'-nucleotidase domain containing 2
767716	0.9785	3.8714	5.1816	0.00043614	0.029551	0.26867	krt1-c5	"keratin, type 1, gene c5"
562139	-1.4039	5.3741	-5.1789	0.00043783	0.029555	0.26479	562139	NA
108192189	1.1981	3.8406	5.1649	0.00044666	0.029926	0.24482	si:ch211-113d11.6	si:ch211-113d11.6
393704	-0.51812	3.7861	-5.1605	0.0004495	0.030005	0.23847	gabra6a	gamma-aminobutyric acid type A receptor subunit alpha6a
567631	1.1994	3.8131	5.1512	0.00045551	0.030182	0.22518	tg	thyroglobulin
768158	-0.57281	4.0638	-5.1452	0.00045944	0.03022	0.21658	pm20d1.2	"peptidase M20 domain containing 1, tandem duplicate 2"
402979	0.75186	4.3535	5.1387	0.00046376	0.030394	0.20721	cdab	cytidine deaminase b
373089	0.60351	5.163	5.1091	0.0004839	0.031383	0.16465	tjp3	tight junction protein 3
556989	0.67707	5.256	5.1089	0.00048408	0.031383	0.16428	LOC556989	myosin-IIIb
569348	-0.57927	5.1172	-5.102	0.00048892	0.031584	0.15431	h6pd	hexose-6-phosphate dehydrogenase (glucose 1-dehydrogenase)
447890	1.3617	2.0113	5.0755	0.00050796	0.03258	0.11606	ms4a17a.5	"membrane-spanning 4-domains, subfamily A, member 17A.5"
553513	-0.5908	6.4467	-5.0773	0.00050666	0.03258	0.11862	idi1	isopentenyl-diphosphate delta isomerase 1
565541	-1.4554	-0.55275	-5.0725	0.00051012	0.032602	0.11181	rca2.2	regulator of complement activation group 2 gene 2
558924	0.60765	8.4006	5.0677	0.00051372	0.032716	0.10477	abca1a	"ATP-binding cassette, sub-family A (ABC1), member 1A"
569518	-1.1132	1.2272	-5.0604	0.00051915	0.03283	0.094235	ankrd33ab	ankyrin repeat domain 33Ab
565838	-0.9448	2.8391	-5.0627	0.00051745	0.03283	0.097514	adrb2a	"adrenoceptor beta 2, surface a"
100037325	-0.70709	1.8709	-5.0576	0.00052127	0.032849	0.090159	ucmaa	upper zone of growth plate and cartilage matrix associated a
553701	-0.92814	4.2788	-5.0302	0.00054236	0.034059	0.050419	gda	guanine deaminase
560210	0.94225	4.6663	5.0238	0.00054747	0.03426	0.041029	hsp70l	"heat shock cognate 70-kd protein, like"
494166	1.4057	1.6208	5.0212	0.00054953	0.034271	0.037259	b3gnt3.1	"UDP-GlcNAc:betaGal beta-1,3-N-acetylglucosaminyltransferase 3, tandem duplicate 1"
100007793	-0.96051	4.5049	-5.0167	0.0005531	0.034374	0.030773	zgc:175280	zgc:175280
571287	-1.1859	2.2696	-5.0064	0.00056143	0.034556	0.015805	slc28a1	solute carrier family 28 member 1
492500	1.0654	6.5348	4.9936	0.00057199	0.034556	-0.0028795	gsto2	glutathione S-transferase omega 2
553677	0.73045	1.9778	5.0053	0.00056236	0.034556	0.014142	twf2b	twinfilin actin-binding protein 2b
751686	-0.58218	7.0071	-4.9989	0.00056765	0.034556	0.0047658	slc24a2	solute carrier family 24 member 2
566407	0.67066	3.1414	4.998	0.00056838	0.034556	0.0034743	foxf1	forkhead box F1
317733	-0.9919	2.349	-4.9973	0.00056895	0.034556	0.002471	esr2b	estrogen receptor 2b
563663	-0.7661	4.9216	-4.9921	0.00057328	0.034556	-0.0051239	serpinf2b	"serpin peptidase inhibitor, clade F (alpha-2 antiplasmin, pigment epithelium derived factor), member 2b"
393113	-0.87409	1.4849	-4.9861	0.00057826	0.03474	-0.013804	upp2	uridine phosphorylase 2
562595	-0.4662	4.7046	-4.9709	0.00059126	0.035403	-0.036073	flvcr1	FLVCR heme transporter 1
100149863	1.1624	3.7369	4.9663	0.00059528	0.035525	-0.042858	her4.1	"hairy-related 4, tandem duplicate 1"
553552	1.3085	3.6352	4.9615	0.0005994	0.035654	-0.049785	fthl31	"ferritin, heavy polypeptide-like 31"
492358	-1.054	3.934	-4.9543	0.00060574	0.035912	-0.060322	cx28.9	connexin 28.9
334253	1.3871	2.1539	4.9372	0.00062116	0.036693	-0.085522	trim35-27	tripartite motif containing 35-27
562845	-0.71584	3.4652	-4.9351	0.00062299	0.036693	-0.088466	rhol	"rhodopsin, like"
322701	-0.92995	6.6825	-4.9277	0.00062987	0.036793	-0.099478	serpina1	"serpin peptidase inhibitor, clade A (alpha-1 antiproteinase, antitrypsin), member 1"
798527	0.62573	6.5796	4.9266	0.00063081	0.036793	-0.10098	abcb5	"ATP-binding cassette, sub-family B (MDR/TAP), member 5"
100538169	-0.89699	1.9834	-4.9189	0.00063798	0.036972	-0.1123	fndc7a	fibronectin type III domain containing 7a
436734	1.2061	6.1679	4.8881	0.00066751	0.038436	-0.15766	txn	thioredoxin
561635	0.66056	3.3621	4.8897	0.00066599	0.038436	-0.15538	mylk3	myosin light chain kinase 3
373132	0.57756	3.5624	4.885	0.00067055	0.038488	-0.16222	p4ha2	"procollagen-proline, 2-oxoglutarate 4-dioxygenase (proline 4-hydroxylase), alpha polypeptide 2"
553377	-1.3134	2.1981	-4.8791	0.00067643	0.03858	-0.17097	prg4b	proteoglycan 4b
554141	-0.96752	5.9227	-4.881	0.00067459	0.03858	-0.16823	c9	complement component 9
541384	0.48461	6.4227	4.8742	0.00068131	0.038736	-0.17818	mybpc2b	myosin binding protein Cb
322462	0.93143	7.1364	4.8697	0.00068589	0.038873	-0.18489	sult6b1	"sulfotransferase family, cytosolic, 6b, member 1"
100148329	0.69166	4.5868	4.8669	0.00068867	0.038909	-0.18896	her4.2	"hairy-related 4, tandem duplicate 2"
557567	0.61704	3.4825	4.861	0.00069476	0.039107	-0.19778	bmp7b	bone morphogenetic protein 7b
58068	-0.75572	5.9067	-4.8593	0.00069653	0.039107	-0.20032	pcxb	pyruvate carboxylase b
100005237	1.3595	1.8925	4.856	0.00069983	0.039171	-0.20508	ifitm5	interferon induced transmembrane protein 5
559296	0.77776	0.094479	4.8486	0.00070758	0.039391	-0.21611	gbp4	guanylate binding protein 4
571403	0.60798	6.9366	4.8479	0.00070827	0.039391	-0.21709	znf395a	zinc finger protein 395a
570225	0.71049	4.5637	4.845	0.0007113	0.039391	-0.22137	dhx40	DEAH (Asp-Glu-Ala-His) box polypeptide 40
561694	0.55112	5.7418	4.8439	0.0007125	0.039391	-0.22306	si:ch211-225b11.1	si:ch211-225b11.1
568001	0.64704	5.723	4.8346	0.00072235	0.039813	-0.23683	pfkmb	"phosphofructokinase, muscle b"
100005359	-0.86063	0.57578	-4.8325	0.0007246	0.039815	-0.23995	si:ch211-286b4.4	si:ch211-286b4.4
793127	-0.70993	3.1938	-4.824	0.00073379	0.040076	-0.25259	c8b	"complement component 8, beta polypeptide"
30531	0.95569	3.2677	4.8146	0.00074406	0.040514	-0.26653	msx2b	muscle segment homeobox 2b
562007	-0.97712	4.4484	-4.8091	0.00075021	0.040726	-0.27478	irg1l	"immunoresponsive gene 1, like"
553427	0.81613	2.2602	4.8059	0.00075377	0.040797	-0.27953	pou2f3	POU class 2 homeobox 3
552997	-0.56544	5.4599	-4.8022	0.00075789	0.040897	-0.285	fdps	"farnesyl diphosphate synthase (farnesyl pyrophosphate synthetase, dimethylallyltranstransferase, geranyltranstransferase)"
436636	-0.7454	5.5611	-4.7988	0.00076173	0.040981	-0.29006	cd36	CD36 molecule (thrombospondin receptor)
337514	0.6129	3.6057	4.7953	0.00076569	0.041071	-0.29526	mpx	myeloid-specific peroxidase
567504	0.8582	-0.38916	4.7889	0.00077297	0.041339	-0.30476	ifit12	interferon-induced protein with tetratricopeptide repeats 12
553708	-0.80862	2.4228	-4.7861	0.00077621	0.04138	-0.30895	pde6ga	"phosphodiesterase 6G, cGMP-specific, rod, gamma, paralog a"
337696	0.95583	6.6654	4.7835	0.00077923	0.04138	-0.31285	cbr1l	carbonyl reductase 1-like
100149956	0.60268	4.614	4.7808	0.00078237	0.04138	-0.31689	rgl3a	ral guanine nucleotide dissociation stimulator-like 3a
83908	-1.0237	7.7755	-4.7777	0.000786	0.041421	-0.32152	ucp1	uncoupling protein 1
386661	-1.3419	0.97422	-4.7698	0.00079524	0.041665	-0.33325	scd	stearoyl-CoA desaturase (delta-9-desaturase)
117509	0.53864	5.7918	4.7711	0.00079368	0.041665	-0.33128	klf2b	Kruppel-like factor 2b
100151416	-0.73643	3.9493	-4.764	0.00080216	0.041871	-0.34194	cdkn1a	cyclin-dependent kinase inhibitor 1A
387260	0.88834	5.3994	4.7626	0.00080382	0.041871	-0.34402	scarb1	"scavenger receptor class B, member 1"
436813	-0.62113	2.0291	-4.7586	0.0008086	0.041898	-0.34997	rpp25l	ribonuclease P/MRP 25 subunit-like
386799	0.92161	5.8302	4.7564	0.00081127	0.041898	-0.35327	si:dkey-222n6.2	si:dkey-222n6.2
562009	0.56772	6.947	4.7549	0.00081315	0.041898	-0.35559	spint2	"serine peptidase inhibitor, Kunitz type, 2"
100149066	0.70832	4.1332	4.7545	0.00081365	0.041898	-0.35621	her4.4	"hairy-related 4, tandem duplicate 4"
406207	-0.52135	5.4313	-4.747	0.00082273	0.042022	-0.36734	mttp	microsomal triglyceride transfer protein
678603	0.52866	5.9923	4.7469	0.00082283	0.042022	-0.36746	st14a	suppression of tumorigenicity 14a
336425	0.70103	9.7799	4.7462	0.00082373	0.042022	-0.36856	aldoaa	"aldolase a, fructose-bisphosphate, a"
335309	0.66028	5.8688	4.7438	0.00082676	0.042022	-0.37224	agr1	anterior gradient 1
768185	-0.84902	2.9993	-4.743	0.00082771	0.042022	-0.37339	hsd17b7	hydroxysteroid (17-beta) dehydrogenase 7
447836	0.8143	7.5559	4.735	0.00083763	0.042406	-0.38535	pfkma	"phosphofructokinase, muscle a"
110440136	-0.52308	3.9936	-4.7258	0.00084919	0.042871	-0.3991	LOC110440136	peroxisomal N(1)-acetyl-spermine/spermidine oxidase-like
335285	1.1642	1.4502	4.7205	0.00085593	0.043091	-0.40703	si:ch73-170d6.2	si:ch73-170d6.2
406426	0.48229	6.7106	4.7153	0.0008627	0.043291	-0.41493	spint1a	"serine peptidase inhibitor, Kunitz type 1 a"
449556	-1.0796	3.9717	-4.6932	0.00089174	0.04452	-0.44814	ttr	"transthyretin (prealbumin, amyloidosis type I)"
393870	-0.96171	3.7754	-4.6763	0.0009146	0.045535	-0.47354	zgc:77739	zgc:77739
447860	-0.97898	5.2651	-4.672	0.00092049	0.045702	-0.47998	acsl5	acyl-CoA synthetase long chain family member 5
101882744	1.0259	5.9698	4.6626	0.00093361	0.046087	-0.49419	LOC101882744	NLR family CARD domain-containing protein 3-like
570622	0.90804	1.7611	4.6621	0.00093432	0.046087	-0.49495	gbp2	guanylate binding protein 2
641291	0.99965	2.4777	4.661	0.00093591	0.046087	-0.49666	ahrra	aryl-hydrocarbon receptor repressor a
323481	1.3277	1.8367	4.6521	0.00094849	0.046294	-0.51006	bhlha9	"basic helix-loop-helix family, member a9"
572452	0.50379	6.2697	4.6531	0.00094713	0.046294	-0.50862	bmp1a	bone morphogenetic protein 1a
557257	0.45279	8.3379	4.6508	0.00095039	0.046294	-0.51206	col17a1a	"collagen, type XVII, alpha 1a"
560859	0.58634	3.7558	4.6464	0.00095665	0.046473	-0.51864	cdcp1b	CUB domain containing protein 1b
108181520	-0.8069	-0.44381	-4.6418	0.00096338	0.046675	-0.52568	pimr64	"Pim proto-oncogene, serine/threonine kinase, related 64"
556744	-0.58165	4.6607	-4.6317	0.00097805	0.047012	-0.54084	uroc1	urocanate hydratase 1
492518	-0.80607	3.8526	-4.6317	0.00097817	0.047012	-0.54097	haao	"3-hydroxyanthranilate 3,4-dioxygenase"
445505	0.92262	5.833	4.6141	0.0010045	0.04815	-0.56764	fbp2	"fructose-1,6-bisphosphatase 2"
553472	-1.2539	1.9463	-4.6112	0.0010088	0.048227	-0.57192	habp2	hyaluronan binding protein 2
565972	0.50312	4.8544	4.6068	0.0010155	0.04842	-0.57858	ftr83	"finTRIM family, member 83"
503601	1.1934	1.6839	4.6036	0.0010205	0.048529	-0.5835	sft2d2a	SFT2 domain containing 2a
797527	0.51735	3.3372	4.5811	0.0010558	0.049946	-0.61765	crfb4	cytokine receptor family member b4
558820	0.58326	4.2056	4.5793	0.0010587	0.049949	-0.62035	si:dkeyp-106c3.1	si:dkeyp-106c3.1
336673	0.91034	3.4915	4.5775	0.0010616	0.049955	-0.62309	ch25hl1.1	"cholesterol 25-hydroxylase like 1, tandem duplicate 1"
100005129	-2.9208	-3.9661	-4.5732	0.0010687	0.050158	-0.62978	LOC100005129	legumain-like
402914	1.0001	2.9973	4.5678	0.0010774	0.050367	-0.63793	her12	hairy-related 12
560421	-4.5653	-3.0292	-4.567	0.0010787	0.050367	-0.63915	cbln9	cerebellin 9
553969	1.2269	8.3886	4.5605	0.0010894	0.050689	-0.64906	cyp3a65	"cytochrome P450, family 3, subfamily A, polypeptide 65"
100333974	-0.7951	2.1949	-4.5589	0.001092	0.050689	-0.65144	tmc4	transmembrane channel-like 4
393802	-0.73098	6.031	-4.5577	0.001094	0.050689	-0.65332	camk1gb	calcium/calmodulin-dependent protein kinase IGb
323737	0.39621	4.9197	4.556	0.0010969	0.050692	-0.65596	slc35b4	solute carrier family 35 member B4
108190746	1.6592	-0.76104	4.5529	0.0011021	0.050801	-0.6607	LOC108190746	histone H3-like
563178	-0.84401	3.0318	-4.5432	0.0011184	0.05142	-0.6754	si:dkeyp-72e1.7	si:dkeyp-72e1.7
406280	-0.62138	5.3963	-4.5346	0.0011332	0.051899	-0.68862	itih2	inter-alpha-trypsin inhibitor heavy chain 2
108179508	-1.7879	-1.2843	-4.5338	0.0011346	0.051899	-0.68981	LOC108179508	carcinoembryonic antigen-related cell adhesion molecule 5-like
100534669	-1.62	-1.9546	-4.5292	0.0011426	0.052133	-0.69688	LOC100534669	bcl-2-like protein 1
101886109	0.51923	3.3099	4.5263	0.0011475	0.052167	-0.70118	styk1a	serine/threonine/tyrosine kinase 1a
100536506	-0.50142	3.3596	-4.5254	0.0011491	0.052167	-0.70261	LOC100536506	uncharacterized LOC100536506
322604	-0.6679	4.0499	-4.5203	0.0011581	0.052324	-0.71043	shbg	sex hormone-binding globulin
561287	0.53303	4.5151	4.5201	0.0011584	0.052324	-0.71066	f13a1b	"coagulation factor XIII, A1 polypeptide b"
100003349	1.0813	1.1513	4.5165	0.0011648	0.052483	-0.71622	si:cabz01036022.1	si:cabz01036022.1
791993	0.64058	5.184	4.5115	0.0011737	0.0527	-0.72384	wnt4b	"wingless-type MMTV integration site family, member 4b"
557834	0.63503	3.4245	4.5105	0.0011755	0.0527	-0.72537	itpa	inosine triphosphatase (nucleoside triphosphate pyrophosphatase)
100126123	1.2417	3.1412	4.5069	0.0011821	0.05285	-0.73101	hsp70.1	"heat shock cognate 70-kd protein, tandem duplicate 1"
641477	2.4901	-1.2494	4.5054	0.0011847	0.05285	-0.7332	zgc:123299	zgc:123299
450007	-0.56498	3.4971	-4.5036	0.001188	0.052869	-0.73603	fhl2b	four and a half LIM domains 2b
564121	-1.0618	4.5799	-4.5011	0.0011926	0.052935	-0.73989	si:ch211-133l5.7	si:ch211-133l5.7
393379	-0.73674	1.4546	-4.4995	0.0011954	0.052935	-0.74224	zgc:64065	zgc:64065
450024	0.57693	4.9131	4.4859	0.0012205	0.053862	-0.76314	cited2	"Cbp/p300-interacting transactivator, with Glu/Asp-rich carboxy-terminal domain, 2"
566059	0.73065	2.3742	4.485	0.0012223	0.053862	-0.76459	abi3b	"ABI family, member 3b"
322921	0.52884	5.8953	4.4792	0.0012331	0.054086	-0.77339	nid2a	nidogen 2a (osteonidogen)
566858	0.43491	4.2981	4.4791	0.0012334	0.054086	-0.77364	mov10a	Mov10 RISC complex RNA helicase a
100000769	-0.74007	5.199	-4.4754	0.0012403	0.054259	-0.77928	cryaa	"crystallin, alpha A"
140622	-0.41571	4.677	-4.473	0.0012448	0.054321	-0.78287	atic	5-aminoimidazole-4-carboxamide ribonucleotide formyltransferase/IMP cyclohydrolase
337770	1.5518	6.8467	4.4711	0.0012486	0.054355	-0.78592	si:ch73-187m15.4	si:ch73-187m15.4
796031	1.7291	-1.7934	4.4694	0.0012517	0.05436	-0.78843	si:dkeyp-75b4.8	si:dkeyp-75b4.8
556849	1.333	2.5893	4.4659	0.0012586	0.054407	-0.79393	entpd5a	ectonucleoside triphosphate diphosphohydrolase 5a
567916	-1.695	1.4828	-4.4657	0.0012588	0.054407	-0.79412	stxbp4	syntaxin binding protein 4
798626	-0.66661	3.0709	-4.4471	0.0012952	0.055846	-0.82272	zgc:194392	zgc:194392
100000352	1.3077	-1.1999	4.4429	0.0013037	0.05597	-0.82928	si:dkey-152b24.7	si:dkey-152b24.7
394210	-0.68661	2.8736	-4.4426	0.0013043	0.05597	-0.82975	baiap2l2a	BAR/IMD domain containing adaptor protein 2 like 2a
360149	0.42373	7.5408	4.4358	0.0013179	0.056419	-0.84015	nfe2l2a	"nuclear factor, erythroid 2-like 2a"
64605	0.64973	4.9083	4.4329	0.0013239	0.056541	-0.8447	htatip2	HIV-1 Tat interactive protein 2
567816	-1.2936	4.2708	-4.4265	0.0013369	0.056962	-0.85453	LOC567816	zona pellucida-like domain-containing protein 1
556385	0.45339	5.0847	4.4133	0.0013644	0.057735	-0.87495	mxra8b	matrix-remodelling associated 8b
100003387	0.59269	2.3197	4.4132	0.0013645	0.057735	-0.87501	spata2l	spermatogenesis associated 2-like
335152	1.9505	-0.030929	4.4132	0.0013647	0.057735	-0.87514	prss60.3	serine protease 60.3
568225	-0.671	1.5933	-4.4111	0.0013691	0.057786	-0.87839	cacna2d4a	"calcium channel, voltage-dependent, alpha 2/delta subunit 4a"
777792	-0.50323	2.8344	-4.4074	0.0013768	0.057973	-0.88405	sult2st3	"sulfotransferase family 2, cytosolic sulfotransferase 3"
30489	-1.1846	1.1359	-4.4056	0.0013805	0.057973	-0.88676	bfb	complement component bfb
100136844	1.2499	1.4546	4.403	0.0013862	0.057973	-0.89088	zgc:172106	zgc:172106
553256	-0.61007	4.8934	-4.402	0.0013884	0.057973	-0.89243	slc6a19a.1	"solute carrier family 6 member 19a, tandem duplicate 1"
101887125	0.70322	4.8542	4.4014	0.0013896	0.057973	-0.89331	ptx3a	"pentraxin 3, long a"
563738	-0.88429	2.726	-4.3997	0.0013933	0.057995	-0.89602	si:ch211-284e20.8	si:ch211-284e20.8
563287	-1.367	-0.7218	-4.3914	0.0014111	0.058306	-0.90875	gdf2	growth differentiation factor 2
557269	-1.1674	1.6779	-4.3913	0.0014114	0.058306	-0.90898	pdzd3a	PDZ domain containing 3a
407639	1.4156	2.2034	4.3904	0.0014132	0.058306	-0.91026	gh1	growth hormone 1
768294	-1.9243	-1.6446	-4.3882	0.0014181	0.058306	-0.91369	cyp2aa2	"y cytochrome P450, family 2, subfamily AA, polypeptide 2"
777622	0.55579	2.9282	4.3875	0.0014197	0.058306	-0.91482	tmem51a	transmembrane protein 51a
100007164	-2.4682	-1.0669	-4.3867	0.0014215	0.058306	-0.91613	cbln14	cerebellin 14
570520	0.63475	2.0953	4.3858	0.0014234	0.058306	-0.91747	inha	inhibin subunit alpha
100330801	-1.1255	-0.69272	-4.3824	0.001431	0.058483	-0.92279	cd44b	CD44 molecule (Indian blood group) b
555679	1.2906	3.6317	4.379	0.0014385	0.058502	-0.928	scpp5	secretory calcium-binding phosphoprotein 5
403027	0.98206	1.7452	4.3786	0.0014392	0.058502	-0.92854	snx10a	sorting nexin 10a
100000750	-3.2547	-3.0961	-4.3754	0.0014465	0.058502	-0.93362	g6pcb	"glucose-6-phosphatase b, catalytic subunit"
100000859	-1.0466	3.2644	-4.3751	0.0014472	0.058502	-0.93407	ehhadh	"enoyl-CoA, hydratase/3-hydroxyacyl CoA dehydrogenase"
100008376	0.66582	8.8853	4.3748	0.0014477	0.058502	-0.93443	wu:fd14a01	wu:fd14a01
393307	0.49002	6.1143	4.3602	0.0014807	0.059703	-0.95707	maff	v-maf avian musculoaponeurotic fibrosarcoma oncogene homolog F
569058	-0.9067	3.0127	-4.3551	0.0014927	0.060049	-0.96512	cd109	CD109 molecule
322691	-0.564	5.887	-4.3517	0.0015004	0.060202	-0.97032	plg	plasminogen
559518	3.3132	-1.1664	4.3505	0.0015031	0.060202	-0.97214	tmem119a	transmembrane protein 119a
100148522	1.0041	5.1265	4.3475	0.0015103	0.060286	-0.97689	si:ch211-217a12.1	si:ch211-217a12.1
799889	-0.7747	2.4763	-4.3468	0.0015119	0.060286	-0.97798	LOC799889	GTPase IMAP family member 7-like
767636	-0.46323	5.275	-4.3385	0.0015314	0.060927	-0.99084	rgs9a	regulator of G protein signaling 9a
100000633	1.8909	-1.7297	4.3371	0.0015348	0.060927	-0.99304	LOC100000633	E3 ubiquitin/ISG15 ligase TRIM25
494572	-1.2437	2.1108	-4.3334	0.0015437	0.061148	-0.99887	guca1g	guanylate cyclase activator 1g
100538314	0.59688	4.6834	4.3317	0.0015476	0.061168	-1.0014	il17rc	interleukin 17 receptor C
100149419	-1.0389	3.8908	-4.3206	0.0015745	0.061978	-1.0187	si:dkey-69o16.5	si:dkey-69o16.5
445208	-0.47471	4.9046	-4.3204	0.001575	0.061978	-1.019	camk2d1	calcium/calmodulin-dependent protein kinase (CaM kinase) II delta 1
556499	-0.88323	0.8233	-4.3166	0.0015843	0.06221	-1.0249	atp7b	ATPase copper transporting beta
558466	0.78448	5.7298	4.3151	0.0015881	0.062222	-1.0273	uckl1b	uridine-cytidine kinase 1-like 1b
567045	-1.3082	1.9987	-4.3103	0.0015999	0.062548	-1.0347	kif16bb	kinesin family member 16Bb
100002479	-1.3952	-1.0762	-4.3076	0.0016068	0.062682	-1.0391	epob	erythropoietin b
767662	1.0892	2.8075	4.3004	0.0016248	0.06314	-1.0503	slc25a38a	solute carrier family 25 member 38a
641422	1.0999	1.5709	4.3001	0.0016255	0.06314	-1.0507	zgc:123284	zgc:123284
100535634	0.87979	0.63572	4.2912	0.0016481	0.063878	-1.0645	pip4k2cb	"phosphatidylinositol-5-phosphate 4-kinase, type II, gamma b"
567117	-0.95221	2.1773	-4.2648	0.0017174	0.066424	-1.1059	slc7a9	solute carrier family 7 member 9
322358	-0.47801	4.0359	-4.2588	0.0017335	0.066783	-1.1152	hnf4a	"hepatocyte nuclear factor 4, alpha"
436632	-0.89225	2.7765	-4.2586	0.0017342	0.066783	-1.1156	sccpdha.1	"saccharopine dehydrogenase a, tandem duplicate 1"
192294	0.67331	2.6219	4.2512	0.0017544	0.067417	-1.1272	tbx6	T-box transcription factor 6
30708	-0.91489	8.1867	-4.2364	0.0017952	0.068841	-1.1503	fabp2	"fatty acid binding protein 2, intestinal"
553614	-1.1682	1.5733	-4.2307	0.0018113	0.069311	-1.1593	itih3a	inter-alpha-trypsin inhibitor heavy chain 3a
562371	2.0522	0.60247	4.227	0.001822	0.069364	-1.1652	cyp2k20	"cytochrome P450, family 2, subfamily k, polypeptide 20"
100535101	0.86535	4.7507	4.2262	0.0018241	0.069364	-1.1663	100535101	NA
30212	0.72716	3.0819	4.2249	0.001828	0.069364	-1.1685	gsc	goosecoid
793087	-0.44966	3.8042	-4.2198	0.0018426	0.069364	-1.1765	rgs9b	regulator of G protein signaling 9b
777635	0.59161	4.851	4.2193	0.0018439	0.069364	-1.1772	plod1a	"procollagen-lysine, 2-oxoglutarate 5-dioxygenase 1a"
436842	0.90918	4.6512	4.2189	0.0018452	0.069364	-1.1779	tpmt.1	"thiopurine S-methyltransferase, tandem duplicate 1"
100134974	-1.4495	0.93205	-4.2165	0.0018521	0.069364	-1.1816	ebi3	Epstein-Barr virus induced 3
568258	0.61587	3.2947	4.2163	0.0018527	0.069364	-1.1819	slc9a3.1	"solute carrier family 9 member A3, tandem duplicate 1"
326706	1.2654	7.0569	4.2162	0.0018531	0.069364	-1.1822	lgals1l1	"lectin, galactoside-binding, soluble, 1 (galectin 1)-like 1"
100000642	-2.3463	-3.4055	-4.2148	0.0018571	0.069364	-1.1843	wu:fj20b03	wu:fj20b03
563199	-0.63409	1.7301	-4.2143	0.0018585	0.069364	-1.1851	si:ch211-120k19.1	si:ch211-120k19.1
554128	-1.3417	-0.26569	-4.2142	0.0018589	0.069364	-1.1853	crygmxl1	"crystallin, gamma MX, like 1"
555317	0.9517	2.274	4.2105	0.0018697	0.069624	-1.1911	si:ch211-276a23.5	si:ch211-276a23.5
556522	-0.82315	2.4098	-4.206	0.0018827	0.069671	-1.198	agmat	agmatine ureohydrolase (agmatinase)
101884807	-1.2145	0.27532	-4.2058	0.0018834	0.069671	-1.1984	amfrb	autocrine motility factor receptor b
100330435	-1.1545	0.49359	-4.2044	0.0018875	0.069671	-1.2006	apobb.2	"apolipoprotein Bb, tandem duplicate 2"
571146	-0.70369	4.7127	-4.2044	0.0018876	0.069671	-1.2007	tent5ab	terminal nucleotidyltransferase 5Ab
568891	0.61939	4.3665	4.2035	0.0018903	0.069671	-1.2021	si:ch211-79k12.1	si:ch211-79k12.1
100000629	0.79783	2.8485	4.2001	0.0019004	0.0699	-1.2074	si:ch211-136m16.8	si:ch211-136m16.8
561866	1.1126	-1.0736	4.1973	0.0019086	0.069912	-1.2117	kcnk3a	"potassium channel, subfamily K, member 3a"
282672	-0.88519	6.7199	-4.1965	0.001911	0.069912	-1.213	fbp1b	"fructose-1,6-bisphosphatase 1b"
559705	-2.131	0.94283	-4.1961	0.0019124	0.069912	-1.2137	cbln10	cerebellin 10
79375	0.57417	4.2842	4.19	0.0019306	0.070308	-1.2233	foxc1b	forkhead box C1b
563506	0.67173	5.9069	4.1899	0.001931	0.070308	-1.2235	tiparp	TCDD-inducible poly(ADP-ribose) polymerase
798347	0.54435	4.8891	4.1806	0.0019594	0.071197	-1.2381	tpp1	tripeptidyl peptidase I
245703	0.74672	3.4793	4.1755	0.0019752	0.071592	-1.2462	atp1a1a.5	"ATPase Na+/K+ transporting subunit alpha 1a, tandem duplicate 5"
571391	0.67025	4.5003	4.1745	0.0019782	0.071592	-1.2477	emilin2b	elastin microfibril interfacer 2b
30396	0.44058	5.516	4.1717	0.0019868	0.071761	-1.2521	elf1	E74-like ETS transcription factor 1
566347	-0.86353	3.5753	-4.1696	0.0019936	0.071863	-1.2555	c3b.2	"complement component c3b, tandem duplicate 2"
406339	0.49786	4.9494	4.1662	0.0020043	0.071998	-1.2608	hk2	hexokinase 2
559457	0.5864	2.4484	4.1658	0.0020054	0.071998	-1.2614	ccdc173	coiled-coil domain containing 173
436969	1.1472	6.2042	4.161	0.0020208	0.072406	-1.269	zgc:92630	zgc:92630
797092	2.4257	0.6487	4.1548	0.0020406	0.072973	-1.2789	si:dkeyp-94g1.1	si:dkeyp-94g1.1
100330331	2.6019	-0.51192	4.1488	0.0020599	0.073503	-1.2883	si:dkeyp-61b2.1	si:dkeyp-61b2.1
100004954	0.9933	5.4937	4.1477	0.0020636	0.073503	-1.2901	ponzr3	plac8 onzin related protein 3
570052	-0.69166	4.1327	-4.144	0.0020754	0.073777	-1.2958	ppp1r18	"protein phosphatase 1, regulatory subunit 18"
100003064	1.2795	1.5053	4.1412	0.0020846	0.073959	-1.3003	si:ch211-163b2.4	si:ch211-163b2.4
100000463	-0.93848	2.244	-4.1399	0.0020891	0.073973	-1.3024	asgrl1	asialoglycoprotein receptor-like 1
100002173	-1.1977	2.4517	-4.1327	0.0021128	0.074666	-1.3137	cbln20	cerebellin 20
572733	0.94402	7.623	4.1309	0.0021188	0.074732	-1.3166	pgam2	phosphoglycerate mutase 2 (muscle)
100331329	0.48033	4.9895	4.1277	0.0021297	0.074875	-1.3217	tmem176l.3b	transmembrane protein 176l.3b
114429	0.36596	6.1617	4.127	0.0021321	0.074875	-1.3228	znf703	zinc finger protein 703
558920	0.37742	6.8813	4.126	0.0021354	0.074875	-1.3244	amotl2a	angiomotin like 2a
566523	0.46733	4.2451	4.1211	0.0021519	0.075177	-1.3321	arhgap27l	"Rho GTPase activating protein 27, like"
792085	0.56173	7.2893	4.121	0.0021523	0.075177	-1.3323	ndrg1a	N-myc downstream regulated 1a
571588	-1.1436	0.24186	-4.1093	0.0021925	0.076432	-1.3508	tec	tec protein tyrosine kinase
359841	-1.1145	2.3793	-4.1028	0.0022151	0.076981	-1.3611	serpind1	"serpin peptidase inhibitor, clade D (heparin cofactor), member 1"
103911343	1.3882	0.10287	4.1023	0.0022168	0.076981	-1.3619	si:ch1073-153i20.4	si:ch1073-153i20.4
565980	-0.62965	5.4883	-4.091	0.0022568	0.07822	-1.3798	ace	angiotensin I converting enzyme (peptidyl-dipeptidase A) 1
405817	-0.54143	5.3512	-4.0875	0.0022694	0.078474	-1.3854	ppm1na	"protein phosphatase, Mg2+/Mn2+ dependent, 1Na (putative)"
406293	0.55498	6.2688	4.0865	0.0022729	0.078474	-1.3869	tcp11l2	"t-complex 11, testis-specific-like 2"
570638	-0.94004	7.2377	-4.0849	0.0022788	0.078529	-1.3895	apoc1	apolipoprotein C-I
387261	0.5515	3.3987	4.074	0.0023186	0.079748	-1.4069	baiap2l1a	BAR/IMD domain containing adaptor protein 2 like 1a
100332622	-0.66731	3.1849	-4.0632	0.0023584	0.080964	-1.424	spata5	spermatogenesis associated 5
100001880	0.83912	6.4301	4.0598	0.0023712	0.08097	-1.4294	si:dkey-202l22.6	si:dkey-202l22.6
322543	-1.0317	7.3674	-4.0596	0.002372	0.08097	-1.4297	apoa4b.1	"apolipoprotein A-IV b, tandem duplicate 1"
768292	-0.96977	5.1109	-4.0596	0.0023721	0.08097	-1.4298	zgc:153968	zgc:153968
114551	-1.1462	5.5737	-4.054	0.0023932	0.081535	-1.4386	pklr	pyruvate kinase L/R
100537487	-2.2784	-4.1199	-4.0523	0.0023998	0.081589	-1.4414	si:dkey-243k1.3	si:dkey-243k1.3
560719	-0.37652	4.1976	-4.0512	0.0024038	0.081589	-1.4431	si:dkey-206f10.1	si:dkey-206f10.1
30476	0.52525	5.1995	4.049	0.0024122	0.081721	-1.4466	wif1	wnt inhibitory factor 1
101884764	0.67192	2.0767	4.0418	0.0024401	0.08251	-1.4581	lpar6b	lysophosphatidic acid receptor 6b
448859	0.52552	4.5383	4.0384	0.0024535	0.082808	-1.4636	atg4b	"autophagy related 4B, cysteine peptidase"
30331	-0.42552	5.4819	-4.0343	0.0024695	0.083192	-1.4701	cahz	carbonic anhydrase
550409	1.0083	2.3492	4.0328	0.0024754	0.083237	-1.4725	ms4a17a.7	"membrane-spanning 4-domains, subfamily A, member 17A.7"
407626	-1.3604	2.183	-4.0312	0.0024818	0.083294	-1.4751	nr5a5	"nuclear receptor subfamily 5, group A, member 5"
768298	-1.2682	2.1847	-4.0286	0.002492	0.083482	-1.4792	faah2b	fatty acid amide hydrolase 2b
100537515	0.5662	6.9844	4.0242	0.0025093	0.083904	-1.4861	si:cabz01007794.1	si:cabz01007794.1
100463515	0.58105	7.4108	4.022	0.0025183	0.084051	-1.4897	col5a3b	"collagen, type V, alpha 3b"
30104	-0.84623	0.89435	-4.0166	0.00254	0.084618	-1.4983	klf1	Kruppel-like factor 1 (erythroid)
560486	-0.60889	4.09	-4.0153	0.002545	0.084629	-1.5003	xdh	xanthine dehydrogenase
553476	-0.41755	5.0037	-4.0099	0.0025674	0.08507	-1.5091	aqp11	aquaporin 11
100001560	1.6854	-4.1239	4.0083	0.0025736	0.08507	-1.5115	si:dkey-9i23.8	si:dkey-9i23.8
494576	-0.89256	-0.47037	-4.008	0.002575	0.08507	-1.5121	si:dkey-13a21.4	si:dkey-13a21.4
497348	0.57112	8.5977	4.0075	0.0025772	0.08507	-1.5129	matn4	matrilin 4
555782	0.57222	2.7616	4.004	0.0025914	0.085362	-1.5184	ccdc135	coiled-coil domain containing 135
100001767	-1.4377	0.90229	-4.002	0.0025997	0.085362	-1.5216	rnf207a	ring finger protein 207a
407678	1.061	0.33952	4.0019	0.0026002	0.085362	-1.5218	si:dkey-43p13.5	si:dkey-43p13.5
565316	-1.5589	2.5461	-3.9996	0.0026096	0.085515	-1.5254	dgat2	diacylglycerol O-acyltransferase 2
393789	-0.37581	5.1832	-3.9871	0.0026625	0.087079	-1.5455	hdac9b	histone deacetylase 9b
565776	-0.46229	4.4296	-3.9847	0.0026724	0.087079	-1.5493	slc6a2	solute carrier family 6 member 2
100537081	-0.9089	0.42641	-3.9846	0.002673	0.087079	-1.5495	si:ch211-274p24.4	si:ch211-274p24.4
30301	0.84277	2.5963	3.9837	0.0026767	0.087079	-1.5509	her4.5	"hairy-related 4, tandem duplicate 5"
325423	0.72983	4.6618	3.9825	0.0026821	0.087099	-1.5529	fstl1a	follistatin-like 1a
567333	0.46535	2.4787	3.9813	0.0026873	0.087109	-1.5548	ctso	cathepsin O
100286814	0.53265	3.9233	3.9755	0.002712	0.087753	-1.564	rflnb	refilin B
492503	0.82181	5.8504	3.9688	0.0027412	0.088537	-1.5747	si:dkey-42i9.4	si:dkey-42i9.4
393455	-0.55503	3.7885	-3.9594	0.0027827	0.089604	-1.5898	hao2	hydroxyacid oxidase 2 (long chain)
571135	2.5121	-1.5696	3.9591	0.0027841	0.089604	-1.5903	si:dkey-23a13.17	si:dkey-23a13.17
559502	-0.46733	3.1675	-3.9529	0.002812	0.090152	-1.6003	mrc1b	"mannose receptor, C type 1b"
570656	0.66516	2.5387	3.9528	0.0028125	0.090152	-1.6004	zgc:174164	zgc:174164
436603	-0.85798	4.5122	-3.9512	0.0028196	0.090152	-1.603	agxta	alanine--glyoxylate and serine--pyruvate aminotransferase a
560869	0.52536	4.8894	3.95	0.0028252	0.090152	-1.6049	elf3	"E74-like factor 3 (ets domain transcription factor, epithelial-specific )"
798048	-0.49617	3.5298	-3.9498	0.0028262	0.090152	-1.6053	si:dkey-262g12.12	si:dkey-262g12.12
570905	-1.5805	-0.27938	-3.9465	0.002841	0.090307	-1.6105	cfhl1	complement factor H like 1
406578	0.40678	5.1851	3.9465	0.002841	0.090307	-1.6106	stxbp2	syntaxin binding protein 2
445283	0.56927	5.2778	3.9437	0.0028538	0.090554	-1.6151	ciapin1	cytokine induced apoptosis inhibitor 1
323020	0.48398	4.6537	3.9346	0.0028956	0.091573	-1.6296	cers5	ceramide synthase 5
100007702	0.62817	3.4173	3.934	0.0028987	0.091573	-1.6307	rspo3	R-spondin 3
562459	0.39976	4.3812	3.9334	0.0029012	0.091573	-1.6315	znf414	zinc finger protein 414
555443	0.44077	4.8937	3.9321	0.0029075	0.091605	-1.6337	plcd1a	"phospholipase C, delta 1a"
405811	0.622	2.5467	3.9306	0.0029144	0.091605	-1.6361	irf5	interferon regulatory factor 5
393321	0.73378	2.2803	3.9299	0.0029175	0.091605	-1.6371	ero1a	endoplasmic reticulum oxidoreductase alpha
799144	0.79033	2.2714	3.9247	0.0029423	0.092109	-1.6456	ppp1r3da	"protein phosphatase 1, regulatory subunit 3Da"
30481	-1.2315	1.1494	-3.9237	0.002947	0.092109	-1.6472	gata1a	GATA binding protein 1a
560592	-0.48391	2.8868	-3.9227	0.0029515	0.092109	-1.6488	myo15aa	myosin XVAa
101886389	-2.0983	3.0069	-3.9208	0.0029603	0.092109	-1.6517	LOC101886389	otolin-1-like
100384902	1.1721	3.518	3.9204	0.0029624	0.092109	-1.6524	100384902	NA
555988	0.56256	1.5722	3.92	0.0029642	0.092109	-1.653	si:rp71-1d10.5	si:rp71-1d10.5
557748	0.90761	4.7196	3.9151	0.0029877	0.092681	-1.661	ponzr4	plac8 onzin related protein 4
407681	0.60363	3.8321	3.9131	0.0029972	0.092805	-1.6641	foxf2a	forkhead box F2a
677742	-3.0113	-1.7801	-3.9121	0.003002	0.092805	-1.6657	lgals3bpa	"lectin, galactoside-binding, soluble, 3 binding protein a"
100151516	1.0243	-0.41038	3.9096	0.0030144	0.092834	-1.6699	si:ch73-81k8.2	si:ch73-81k8.2
100003928	-0.56455	0.4056	-3.9093	0.003016	0.092834	-1.6704	si:dkey-150i13.2	si:dkey-150i13.2
337675	0.4808	6.8158	3.9085	0.0030194	0.092834	-1.6715	slc25a12	solute carrier family 25 member 12
30523	0.40905	4.7882	3.9077	0.0030236	0.092834	-1.6729	tcf7l1a	transcription factor 7 like 1a
100000771	1.0302	3.9227	3.9043	0.0030402	0.093185	-1.6784	pvalb3	parvalbumin 3
553619	0.5583	3.4399	3.9007	0.0030579	0.093362	-1.6842	lactb	"lactamase, beta"
554650	0.446	6.3403	3.8975	0.0030733	0.093362	-1.6892	bnip3lb	BCL2 interacting protein 3 like b
567853	-0.45495	2.721	-3.8956	0.003083	0.093362	-1.6924	si:ch211-267e7.3	si:ch211-267e7.3
368249	-0.48808	4.9174	-3.8952	0.0030846	0.093362	-1.6929	prickle1a	prickle homolog 1a
564761	0.93331	1.4211	3.8951	0.0030852	0.093362	-1.6931	itih1	inter-alpha-trypsin inhibitor heavy chain 1
556277	0.50601	5.0142	3.8946	0.0030878	0.093362	-1.694	cblb	"Cbl proto-oncogene B, E3 ubiquitin protein ligase"
321449	0.67738	7.5455	3.8942	0.0030899	0.093362	-1.6946	ccn2a	cellular communication network factor 2a
100149543	0.41025	8.5716	3.8936	0.003093	0.093362	-1.6956	col12a1a	"collagen, type XII, alpha 1a"
30115	-0.85083	0.90068	-3.8933	0.0030942	0.093362	-1.696	mixl1	Mix paired-like homeobox
30255	-0.56274	8.899	-3.8914	0.0031036	0.093362	-1.6991	tfa	transferrin-a
563053	0.42995	4.5712	3.8906	0.0031078	0.093362	-1.7004	capn2b	"calpain 2, (m/II) large subunit b"
798836	-0.49756	5.2719	-3.8889	0.0031165	0.093362	-1.7032	tspan13a	tetraspanin 13a
30080	0.71866	0.87001	3.8887	0.0031172	0.093362	-1.7035	mitfa	melanocyte inducing transcription factor a
100005459	-2.0554	-1.057	-3.888	0.0031208	0.093362	-1.7046	spsb3b	splA/ryanodine receptor domain and SOCS box containing 3b
553530	-1.0495	4.1691	-3.886	0.0031309	0.093362	-1.7078	mep1a.1	"meprin A, alpha (PABA peptide hydrolase), tandem duplicate 1"
561925	0.63978	2.8595	3.8857	0.0031322	0.093362	-1.7082	ulk4	unc-51 like kinase 4
436672	-0.57921	3.0622	-3.8854	0.003134	0.093362	-1.7088	pdha1b	pyruvate dehydrogenase E1 subunit alpha 1b
777624	-0.47182	5.0938	-3.8808	0.0031575	0.093906	-1.7163	agpat2	"1-acylglycerol-3-phosphate O-acyltransferase 2 (lysophosphatidic acid acyltransferase, beta)"
550338	-0.39805	3.7387	-3.876	0.0031819	0.094476	-1.724	alad	aminolevulinate dehydratase
494076	-0.38087	6.5464	-3.8737	0.0031937	0.094671	-1.7277	dhtkd1	dehydrogenase E1 and transketolase domain containing 1
558601	-0.69172	3.1195	-3.8706	0.0032095	0.094963	-1.7327	pipox	pipecolic acid oxidase
566020	0.83923	0.86231	3.8697	0.0032141	0.094963	-1.7341	gig2o	grass carp reovirus (GCRV)-induced gene 2o
100001337	1.2254	1.6925	3.8679	0.0032234	0.095082	-1.737	smyhc3	slow myosin heavy chain 3
558363	2.205	-2.2112	3.8649	0.0032393	0.09522	-1.7419	si:dkey-188i13.9	si:dkey-188i13.9
445487	0.5192	5.5815	3.8635	0.0032466	0.09522	-1.7442	fuca2	alpha-L-fucosidase 2
560376	0.63369	3.2599	3.8631	0.0032486	0.09522	-1.7448	hhipl2	HHIP-like 2
246095	0.6924	7.1984	3.863	0.0032492	0.09522	-1.745	gpib	glucose-6-phosphate isomerase b
503711	0.83132	0.43894	3.8608	0.0032608	0.095405	-1.7485	ccdc106b	coiled-coil domain containing 106b
368242	-0.62644	3.8469	-3.858	0.0032755	0.09568	-1.753	kmo	kynurenine 3-monooxygenase
556374	0.50888	4.3059	3.8533	0.0033004	0.09625	-1.7606	si:dkey-102c8.3	si:dkey-102c8.3
101886483	-0.98117	2.3943	-3.8475	0.0033316	0.096918	-1.77	cdhr5b	cadherin-related family member 5b
562763	0.63928	2.8207	3.847	0.003334	0.096918	-1.7708	slc12a10.3	"solute carrier family 12 member 10, tandem duplicate 3"
101883848	-1.4221	-0.67158	-3.8428	0.003357	0.097428	-1.7776	adgre9	adhesion G protein-coupled receptor E9
570333	-0.48058	5.0745	-3.8402	0.003371	0.097669	-1.7818	rcvrna	recoverin a
30243	-0.39841	4.0054	-3.8376	0.0033849	0.097669	-1.7859	en2a	engrailed homeobox 2a
335392	-0.68934	4.358	-3.8375	0.0033859	0.097669	-1.7862	si:ch211-153b23.4	si:ch211-153b23.4
558790	-0.83966	2.5566	-3.8373	0.003387	0.097669	-1.7865	sult3st1	"sulfotransferase family 3, cytosolic sulfotransferase 1"
570390	-4.398	-2.8107	-3.8305	0.0034243	0.098335	-1.7975	apoc4	apolipoprotein C-IV
796425	0.79038	0.37917	3.8299	0.0034276	0.098335	-1.7985	card9	"caspase recruitment domain family, member 9"
556666	-1.1187	1.0485	-3.8291	0.0034317	0.098335	-1.7997	si:dkey-21e2.13	si:dkey-21e2.13
559148	0.6901	3.456	3.8291	0.0034319	0.098335	-1.7997	ptgis	prostaglandin I2 (prostacyclin) synthase
767718	-1.341	1.6103	-3.828	0.003438	0.098353	-1.8015	sult5a1	"sulfotransferase family 5A, member 1"
768248	1.2858	0.24331	3.8269	0.0034444	0.09838	-1.8033	fas	Fas cell surface death receptor
100007788	1.2928	-0.19795	3.8194	0.0034865	0.099425	-1.8155	rab38b	"RAB38b, member of RAS oncogene family"
100534909	0.80036	4.1222	3.8138	0.0035177	0.10009	-1.8244	her15.1	"hairy and enhancer of split-related 15, tandem duplicate 1"
777616	0.55614	4.7803	3.8133	0.0035207	0.10009	-1.8253	zgc:154054	zgc:154054
100384901	0.85282	6.9527	3.8089	0.0035458	0.10064	-1.8324	ugt1a4	"UDP glucuronosyltransferase 1 family, polypeptide A4"
557625	-1.2537	-1.2592	-3.7977	0.0036112	0.10233	-1.8507	tmem54b	transmembrane protein 54b
100000956	0.42877	5.2526	3.7924	0.0036422	0.10305	-1.8592	golim4a	golgi integral membrane protein 4a
569084	0.51199	8.213	3.7896	0.0036585	0.10335	-1.8637	cldni	claudin i
550406	-0.57602	5.3172	-3.7857	0.0036818	0.10385	-1.87	grk1b	G protein-coupled receptor kinase 1 b
406327	-0.62513	6.4411	-3.7838	0.0036932	0.104	-1.8731	fgg	fibrinogen gamma chain
393699	1.4441	3.7039	3.7769	0.0037349	0.10502	-1.8844	scg5	secretogranin V
555815	0.84907	2.3171	3.7749	0.0037469	0.10519	-1.8875	c1qtnf5	C1q and TNF related 5
563263	-0.40211	4.3882	-3.7714	0.0037682	0.10545	-1.8932	btbd17a	BTB (POZ) domain containing 17a
678598	0.47019	4.2201	3.7712	0.0037695	0.10545	-1.8936	pitx1	paired-like homeodomain 1
405829	-0.56006	5.6439	-3.7705	0.0037739	0.10545	-1.8947	dpydb	dihydropyrimidine dehydrogenase b
30607	-0.74307	4.9682	-3.7689	0.0037834	0.10555	-1.8972	thrb	thyroid hormone receptor beta
569585	-0.76781	4.6025	-3.7642	0.0038127	0.10621	-1.905	sptbn5	"spectrin, beta, non-erythrocytic 5"
405825	-1.1121	1.4464	-3.7615	0.0038295	0.10651	-1.9093	mfap4	microfibril associated protein 4
795255	-0.86297	1.892	-3.7602	0.0038374	0.10657	-1.9114	slc38a8b	solute carrier family 38 member 8b
447819	0.3822	5.1705	3.7592	0.0038435	0.10657	-1.913	eya2	EYA transcriptional coactivator and phosphatase 2
557916	1.4007	0.086898	3.7571	0.003857	0.10678	-1.9165	ftr58	"finTRIM family, member 58"
573620	0.9308	0.42202	3.7561	0.0038632	0.10679	-1.9181	msx2a	muscle segment homeobox 2a
100034650	2.1333	-3.0018	3.7533	0.0038807	0.10711	-1.9226	si:dkey-21e2.7	si:dkey-21e2.7
101884911	-0.93448	0.64115	-3.7509	0.003896	0.10718	-1.9266	gsdmea	gasdermin Ea
767694	0.54857	2.722	3.7482	0.0039128	0.10718	-1.9309	slc25a21	solute carrier family 25 member 21
101882278	2.6245	-0.27824	3.7475	0.0039178	0.10718	-1.9321	kel	Kell metallo-endopeptidase (Kell blood group)
393391	0.73754	1.9796	3.7472	0.0039198	0.10718	-1.9327	tpst2	tyrosylprotein sulfotransferase 2
393461	0.51987	5.4449	3.7464	0.0039249	0.10718	-1.934	gmds	"GDP-mannose 4,6-dehydratase"
568321	0.61794	5.0276	3.7452	0.0039321	0.10718	-1.9358	si:dkey-222f2.1	si:dkey-222f2.1
562681	-0.76176	1.0595	-3.7449	0.0039341	0.10718	-1.9363	ankdd1b	ankyrin repeat and death domain containing 1B
564660	-2.3463	-3.6965	-3.7449	0.0039344	0.10718	-1.9364	LOC564660	hypothetical protein LOC564660
768128	0.39365	4.2984	3.744	0.0039399	0.10718	-1.9378	cst14b.1	"cystatin 14b, tandem duplicate 1"
322327	-0.67823	9.7266	-3.7436	0.0039427	0.10718	-1.9385	apoa2	apolipoprotein A-II
415178	0.63543	2.9658	3.7398	0.0039673	0.10768	-1.9447	mymk	"myomaker, myoblast fusion factor"
404726	-0.6288	2.8879	-3.7374	0.0039826	0.10794	-1.9485	cx39.9	connexin 39.9
550268	0.79551	2.5472	3.7358	0.0039928	0.10805	-1.9511	anxa1d	annexin A1d
570928	-0.52318	4.7773	-3.734	0.0040047	0.10816	-1.9541	ptpdc1b	protein tyrosine phosphatase domain containing 1b
558079	0.68872	6.0121	3.7334	0.0040086	0.10816	-1.9551	si:ch211-195b15.8	si:ch211-195b15.8
406484	-1.5411	-1.5684	-3.7256	0.0040599	0.10937	-1.9678	leg1.2	"liver-enriched gene 1, tandem duplicate 2"
394082	0.65375	1.4172	3.7229	0.0040778	0.10946	-1.9722	slc18a3b	solute carrier family 18 member 3b
30632	0.61527	3.9637	3.72	0.0040972	0.10946	-1.9769	bmp2b	bone morphogenetic protein 2b
572211	0.97967	3.4694	3.7193	0.0041019	0.10946	-1.978	srsf7b	serine and arginine rich splicing factor 7b
791206	0.92971	0.79297	3.7186	0.0041066	0.10946	-1.9792	pdk3b	"pyruvate dehydrogenase kinase, isozyme 3b"
100005670	0.80865	2.4784	3.7184	0.0041081	0.10946	-1.9795	mmp28	matrix metallopeptidase 28
114467	-0.52457	3.4558	-3.7178	0.0041117	0.10946	-1.9804	mafa	v-maf avian musculoaponeurotic fibrosarcoma oncogene homolog a (paralog a)
550249	0.62545	6.3316	3.7169	0.0041179	0.10946	-1.9819	tnni2b.1	"troponin I type 2b (skeletal, fast), tandem duplicate 1"
387592	-0.83889	4.106	-3.7159	0.0041248	0.10946	-1.9836	slc13a1	solute carrier family 13 member 1
557043	-1.522	-0.43358	-3.7148	0.0041318	0.10946	-1.9853	cgas	cyclic GMP-AMP synthase
321243	0.37041	6.3033	3.7148	0.004132	0.10946	-1.9854	lama5	"laminin, alpha 5"
553537	0.91776	3.1831	3.7143	0.0041354	0.10946	-1.9862	cyp2aa11	"cytochrome P450, family 2, subfamily AA, polypeptide 11"
541346	-0.45406	3.9858	-3.7142	0.0041361	0.10946	-1.9863	hdhd2	haloacid dehalogenase-like hydrolase domain containing 2
571850	-1.3407	2.6718	-3.7127	0.0041463	0.10947	-1.9888	miox	myo-inositol oxygenase
30493	0.53938	8.009	3.7124	0.0041484	0.10947	-1.9893	id1	"inhibitor of DNA binding 1, HLH protein"
566376	0.62213	3.9256	3.7113	0.0041559	0.1095	-1.9911	zgc:172136	zgc:172136
553297	-0.82322	4.1305	-3.7048	0.0041996	0.11043	-2.0016	cfh	complement factor H
322393	-3.2088	-3.8167	-3.7043	0.0042033	0.11043	-2.0024	si:rp71-15k1.1	si:rp71-15k1.1
562300	0.55207	2.0893	3.703	0.0042119	0.1105	-2.0045	nkx2.4a	NK2 homeobox 4a
568327	-0.9573	0.43996	-3.6996	0.004236	0.11097	-2.0102	kcnt2	"potassium channel, subfamily T, member 2"
767649	0.45542	4.3781	3.6943	0.0042726	0.11176	-2.0188	saraf	store-operated calcium entry-associated regulatory factor
566604	0.57922	5.0034	3.6893	0.0043078	0.11252	-2.027	casp3b	"caspase 3, apoptosis-related cysteine peptidase b"
100149301	-1.8352	-1.9303	-3.6851	0.0043369	0.11312	-2.0337	mon1ba	MON1 secretory trafficking family member Ba
100002307	-1.0728	1.133	-3.6838	0.0043466	0.11321	-2.0359	oscp1a	organic solute carrier partner 1a
563091	1.0929	1.9359	3.6751	0.0044086	0.11466	-2.0501	tnni4b.1	"troponin I4b, tandem duplicate 1"
795537	-0.54998	4.3374	-3.672	0.0044308	0.11507	-2.0551	myo15b	myosin XVB
445102	-0.77804	3.1734	-3.6709	0.0044388	0.11511	-2.0569	c8a	"complement component 8, alpha polypeptide"
561024	-0.53718	2.4217	-3.6687	0.0044548	0.11536	-2.0605	slc6a22.2	"solute carrier family 6 member 22, tandem duplicate 2"
569409	-0.58914	2.653	-3.6652	0.0044805	0.11565	-2.0662	gja8a	gap junction protein alpha 8 paralog a
407680	0.44441	5.685	3.6649	0.0044825	0.11565	-2.0667	gpa33a	"glycoprotein A33 (transmembrane), paralog a"
100330275	-0.51174	3.1814	-3.6642	0.0044883	0.11565	-2.068	mss51	MSS51 mitochondrial translational activator
556598	-1.5206	1.0452	-3.6636	0.0044923	0.11565	-2.0689	si:dkey-21e2.16	si:dkey-21e2.16
569184	-0.41597	4.6697	-3.6622	0.0045027	0.11565	-2.0712	si:dkey-19b23.15	si:dkey-19b23.15
431736	0.5824	2.4147	3.6619	0.0045046	0.11565	-2.0716	bambib	BMP and activin membrane-bound inhibitor homolog (Xenopus laevis) b
569677	0.38141	5.2346	3.659	0.0045266	0.11589	-2.0765	crybg2	crystallin beta-gamma domain containing 2
450063	-0.61093	3.6883	-3.6589	0.0045269	0.11589	-2.0765	mogat2	monoacylglycerol O-acyltransferase 2
406409	0.5279	7.1825	3.6565	0.0045452	0.11597	-2.0805	cyb5a	cytochrome b5 type A (microsomal)
570758	-1.6853	-0.41996	-3.6557	0.0045511	0.11597	-2.0818	igfals	"insulin-like growth factor binding protein, acid labile subunit"
393447	0.78045	4.564	3.6555	0.0045523	0.11597	-2.0821	slc35d1b	solute carrier family 35 member D1b
553445	0.59203	0.59752	3.6551	0.0045555	0.11597	-2.0828	iqcd	IQ motif containing D
337089	0.39025	4.7565	3.6507	0.004588	0.11663	-2.0899	prrx1b	paired related homeobox 1b
406601	0.91286	3.3499	3.6497	0.0045958	0.11666	-2.0916	stap2b	signal transducing adaptor family member 2b
100147904	-0.70527	6.6663	-3.646	0.0046237	0.11721	-2.0976	zanl	"zonadhesin, like"
30741	0.36374	6.5012	3.6423	0.0046516	0.11775	-2.1036	ctnna1	"catenin (cadherin-associated protein), alpha 1"
406338	-0.95003	8.3109	-3.6379	0.0046853	0.11843	-2.1109	chia.2	"chitinase, acidic.2"
558389	-0.94263	1.0045	-3.6338	0.0047173	0.1189	-2.1176	crygm2f	"crystallin, gamma M2f"
793096	-0.74656	4.2015	-3.6335	0.0047196	0.1189	-2.1181	tgm1l2	transglutaminase 1 like 2
777614	0.4761	3.2742	3.633	0.0047234	0.1189	-2.1189	tpcn2	two pore segment channel 2
557914	0.90489	1.1718	3.6306	0.004742	0.1192	-2.1229	nphs2	"NPHS2 stomatin family member, podocin"
555526	-0.98372	2.9225	-3.6286	0.0047576	0.11928	-2.1261	si:ch211-201h21.5	si:ch211-201h21.5
794635	-1.6395	3.8273	-3.6281	0.0047613	0.11928	-2.1269	c4b	complement 4B (Chido blood group)
550608	-1.2743	2.5155	-3.6275	0.0047665	0.11928	-2.128	apoa4a	apolipoprotein A-IV a
767653	-0.87094	0.27444	-3.6267	0.0047725	0.11928	-2.1293	elovl8a	ELOVL fatty acid elongase 8a
101887138	1.5379	-0.71129	3.6246	0.0047885	0.11928	-2.1326	si:ch211-28p3.3	si:ch211-28p3.3
556083	-1.1291	0.71298	-3.6244	0.0047904	0.11928	-2.133	si:ch211-117c19.1	si:ch211-117c19.1
791915	-0.46693	2.7179	-3.624	0.0047934	0.11928	-2.1336	enpp6	ectonucleotide pyrophosphatase/phosphodiesterase 6
555328	-0.36674	4.8659	-3.6229	0.0048022	0.11928	-2.1355	serpinh1a	"serpin peptidase inhibitor, clade H (heat shock protein 47), member 1a"
100006625	-1.2897	-1.6897	-3.6226	0.0048049	0.11928	-2.136	stx1a	syntaxin 1A (brain)
570100	0.71872	4.4919	3.6201	0.0048245	0.1196	-2.1401	admb	adrenomedullin b
100136871	1.0237	3.0123	3.617	0.004849	0.12005	-2.1451	ddx43	DEAD (Asp-Glu-Ala-Asp) box polypeptide 43
563727	0.87746	1.4386	3.6153	0.0048627	0.12022	-2.1479	map3k8	mitogen-activated protein kinase kinase kinase 8
387293	0.83068	2.6982	3.6122	0.0048872	0.12066	-2.153	mmp13a	matrix metallopeptidase 13a
553218	0.48264	5.1414	3.6102	0.004903	0.12089	-2.1562	lsr	lipolysis stimulated lipoprotein receptor
100147849	0.80219	4.767	3.6085	0.0049173	0.12107	-2.1591	LOC100147849	mucin-5B
450000	-0.52889	4.4007	-3.6049	0.0049466	0.12155	-2.165	amt	aminomethyltransferase
559936	-0.75171	0.68734	-3.6044	0.0049502	0.12155	-2.1657	plcxd2	"phosphatidylinositol-specific phospholipase C, X domain containing 2"
100537791	0.48447	4.3061	3.6001	0.0049854	0.12225	-2.1728	si:dkey-91m3.1	si:dkey-91m3.1
566552	0.44163	4.7394	3.5983	0.0050006	0.12245	-2.1758	si:ch211-241j12.3	si:ch211-241j12.3
798206	0.9566	0.68069	3.5969	0.0050119	0.12251	-2.1781	zgc:194551	zgc:194551
100537120	-0.48661	3.7473	-3.5962	0.0050173	0.12251	-2.1792	ppef2a	protein phosphatase with EF-hand domain 2a
394124	-0.89152	1.8904	-3.5955	0.0050233	0.12251	-2.1804	cdc14aa	cell division cycle 14Aa
553681	0.47669	2.2179	3.5934	0.0050406	0.12276	-2.1838	ap5m1	adaptor related protein complex 5 subunit mu 1
556924	3.2595	-2.9002	3.59	0.0050692	0.12315	-2.1894	si:ch211-285c6.1	si:ch211-285c6.1
494155	0.86981	0.43219	3.5895	0.005073	0.12315	-2.1902	serpinb1l1	"serpin peptidase inhibitor, clade B (ovalbumin), member 1, like 1"
100151215	0.31875	6.103	3.5888	0.0050789	0.12315	-2.1913	pde7a	phosphodiesterase 7A
393940	0.40609	5.9386	3.5882	0.0050839	0.12315	-2.1923	atp2a2a	ATPase sarcoplasmic/endoplasmic reticulum Ca2+ transporting 2a
378986	-0.6675	7.2864	-3.5867	0.0050962	0.12316	-2.1947	fga	fibrinogen alpha chain
405789	0.57526	1.9834	3.5865	0.0050979	0.12316	-2.1951	sp7	Sp7 transcription factor
64608	0.71958	8.2107	3.584	0.0051192	0.12347	-2.1992	alas1	"aminolevulinate, delta-, synthase 1"
100332418	-0.62495	3.1547	-3.5821	0.0051351	0.12347	-2.2023	cdh19	"cadherin 19, type 2"
100006972	-0.67716	6.3023	-3.582	0.0051361	0.12347	-2.2025	a2ml	alpha-2-macroglobulin-like
100537042	-1.1008	0.58565	-3.581	0.0051447	0.12347	-2.2042	fam8a1a	family with sequence similarity 8 member A1a
565474	-0.38481	0.52642	-3.5809	0.0051451	0.12347	-2.2043	chadla	chondroadherin-like a
406474	0.57116	4.5741	3.5775	0.0051741	0.12401	-2.2099	adob	2-aminoethanethiol (cysteamine) dioxygenase b
556258	0.73254	6.8069	3.5735	0.0052083	0.12465	-2.2164	tcap	titin-cap (telethonin)
798787	-0.92423	2.8148	-3.5728	0.0052146	0.12465	-2.2176	rnasel3	ribonuclease like 3
325881	-0.70255	5.3048	-3.572	0.0052216	0.12465	-2.219	f2	coagulation factor II (thrombin)
325875	-0.42943	4.3953	-3.5711	0.0052287	0.12465	-2.2203	dgat1a	diacylglycerol O-acyltransferase 1a
101887017	-0.46316	2.1595	-3.5694	0.0052436	0.12484	-2.2232	LOC101887017	leiomodin-1-like
557676	-1.143	1.3462	-3.568	0.005256	0.12497	-2.2255	si:dkey-14d8.7	si:dkey-14d8.7
563023	0.57164	4.7916	3.5618	0.0053098	0.1258	-2.2357	flnb	"filamin B, beta (actin binding protein 278)"
561933	-0.45414	2.3776	-3.5616	0.0053113	0.1258	-2.236	rhot1b	ras homolog family member T1
563828	-0.95751	1.3867	-3.5612	0.0053149	0.1258	-2.2366	si:ch1073-280e3.1	si:ch1073-280e3.1
100270760	1.6676	0.61575	3.5607	0.0053198	0.1258	-2.2376	odam	"odontogenic, ameloblast associated"
445116	0.55874	2.2162	3.56	0.0053256	0.1258	-2.2386	dhrs13b.1	dehydrogenase/reductase (SDR family) member 13b.1
558219	-0.75304	2.1617	-3.5549	0.0053703	0.12658	-2.247	kif25	kinesin family member 25
794481	0.55371	2.7723	3.554	0.0053783	0.12658	-2.2484	zgc:174972	zgc:174972
568419	-0.64541	0.41393	-3.5534	0.0053837	0.12658	-2.2494	mettl11b	methyltransferase like 11B
415165	-0.40096	3.677	-3.5531	0.0053868	0.12658	-2.25	ccne2	cyclin E2
65225	0.54625	7.2632	3.5504	0.0054106	0.12697	-2.2544	ctsd	cathepsin D
558202	0.4219	5.2928	3.5487	0.0054258	0.12716	-2.2572	LOC558202	transmembrane 9 superfamily member 2-like
792884	-0.88895	1.7818	-3.545	0.0054591	0.12762	-2.2633	rxfp2a	relaxin family peptide receptor 2a
799225	-0.52662	4.14	-3.5446	0.005463	0.12762	-2.264	snx8b	sorting nexin 8b
796577	-0.40301	3.5939	-3.5441	0.0054671	0.12762	-2.2648	obsl1a	obscurin like cytoskeletal adaptor 1a
30666	2.4963	-3.4193	3.5434	0.0054735	0.12762	-2.2659	psmb8a	proteasome 20S subunit beta 8A
566538	0.32447	4.9946	3.5418	0.0054876	0.12764	-2.2685	fstb	follistatin b
100333120	1.2089	0.52735	3.5417	0.0054886	0.12764	-2.2687	si:ch73-22a13.3	si:ch73-22a13.3
431715	0.55238	2.7087	3.5372	0.0055295	0.12842	-2.2761	rbck1	RanBP-type and C3HC4-type zinc finger containing 1
794613	0.46965	4.2454	3.5365	0.0055362	0.12842	-2.2773	grhl3	grainyhead-like transcription factor 3
768186	-0.39755	5.1229	-3.5353	0.0055473	0.12851	-2.2793	zgc:153115	zgc:153115
100037357	0.77881	2.9036	3.5301	0.0055946	0.12925	-2.2878	tnfrsf1b	"tumor necrosis factor receptor superfamily, member 1B"
100331563	-0.34011	4.758	-3.5295	0.0056007	0.12925	-2.2888	ehbp1l1b	EH domain binding protein 1-like 1b
402841	-0.58646	6.9262	-3.5295	0.0056008	0.12925	-2.2889	adh8b	alcohol dehydrogenase 8b
563394	-0.53412	2.8713	-3.5279	0.0056153	0.12938	-2.2914	gtf3c2	"general transcription factor IIIC, polypeptide 2, beta"
565876	-0.58871	3.3932	-3.5271	0.0056226	0.12938	-2.2927	si:dkey-91i10.3	si:dkey-91i10.3
337572	0.61739	3.4821	3.5265	0.0056282	0.12938	-2.2937	ctss2.2	"cathepsin S, ortholog 2, tandem duplicate 2"
792958	0.97431	-0.41476	3.5241	0.0056503	0.12973	-2.2976	LOC792958	nuclear receptor coactivator 7-like
286830	0.40664	6.4746	3.5215	0.0056751	0.13013	-2.302	lamb1a	"laminin, beta 1a"
447896	-0.89215	2.9124	-3.5203	0.0056866	0.13023	-2.304	fuom	fucose mutarotase
796869	-0.86366	1.0108	-3.5194	0.0056949	0.13025	-2.3055	pimr60	"Pim proto-oncogene, serine/threonine kinase, related 60"
574001	-0.90154	4.7347	-3.5182	0.0057056	0.13033	-2.3073	c6ast4	six-cysteine containing astacin protease 4
436825	-0.51688	3.9694	-3.5171	0.0057163	0.13041	-2.3092	s100b	"S100 calcium binding protein, beta (neural)"
563835	-0.43925	2.6923	-3.5148	0.005738	0.13074	-2.313	tctn2	tectonic family member 2
100137120	-1.0139	1.5126	-3.5131	0.0057539	0.13094	-2.3157	zgc:174356	zgc:174356
568846	-0.7934	2.3893	-3.5089	0.0057945	0.13129	-2.3227	si:ch211-160f23.5	si:ch211-160f23.5
735312	-0.63436	6.0951	-3.5083	0.0058001	0.13129	-2.3237	abcg2a	"ATP-binding cassette, sub-family G (WHITE), member 2a"
565922	0.58795	4.0174	3.5076	0.0058068	0.13129	-2.3248	ift46	intraflagellar transport 46 homolog (Chlamydomonas)
325699	0.66081	1.9397	3.5076	0.0058069	0.13129	-2.3249	glipr2	GLI pathogenesis-related 2
767638	0.76533	3.7428	3.5071	0.0058118	0.13129	-2.3257	ftr86	"finTRIM family, member 86"
553296	0.5411	7.4995	3.5069	0.0058132	0.13129	-2.3259	hrc	histidine rich calcium binding protein
559113	0.94965	6.6596	3.5052	0.0058295	0.1315	-2.3287	zgc:193505	zgc:193505
565818	0.92281	4.011	3.5034	0.0058476	0.13174	-2.3318	otomp	otolith matrix protein
450041	-0.60093	1.0047	-3.4963	0.0059163	0.13312	-2.3435	ccdc113	coiled-coil domain containing 113
100150352	2.5365	-2.6621	3.4886	0.005992	0.13456	-2.3561	igfbp6a	insulin-like growth factor binding protein 6a
100536705	0.89531	0.70372	3.4878	0.0059999	0.13456	-2.3574	itgae.2	"integrin, alpha E, tandem duplicate 2"
570583	0.6901	1.9219	3.4875	0.0060029	0.13456	-2.3579	bbs12	Bardet-Biedl syndrome 12
360145	1.4989	0.77507	3.4859	0.0060191	0.13476	-2.3606	mxc	myxovirus (influenza virus) resistance C
100007087	-1.3841	0.87793	-3.484	0.0060384	0.13502	-2.3638	si:dkey-23i12.7	si:dkey-23i12.7
561226	-0.32188	5.6913	-3.4827	0.0060506	0.13508	-2.3658	lnx1	ligand of numb-protein X 1
30478	0.63652	3.2777	3.4822	0.006056	0.13508	-2.3667	ascl1b	achaete-scute family bHLH transcription factor 1b
101882017	-2.3824	-2.3719	-3.479	0.0060884	0.13558	-2.372	sytl3	synaptotagmin-like 3
393654	-0.65336	5.3071	-3.4785	0.0060931	0.13558	-2.3728	slc5a1	solute carrier family 5 member 1
100151173	-0.52803	2.5437	-3.476	0.0061184	0.13581	-2.3769	si:rp71-68n21.9	si:rp71-68n21.9
793301	-0.60065	5.0569	-3.476	0.0061186	0.13581	-2.3769	slc15a1b	solute carrier family 15 member 1b
569147	-0.74144	3.3332	-3.475	0.006129	0.13587	-2.3786	tmem97	transmembrane protein 97
100330415	-1.4063	-0.95051	-3.4734	0.0061453	0.13607	-2.3813	si:dkey-96f10.1	si:dkey-96f10.1
796447	-1.0267	3.0737	-3.4717	0.0061624	0.13628	-2.384	leg1.1	"liver-enriched gene 1, tandem duplicate 1"
566090	1.2131	0.35936	3.4688	0.0061922	0.13656	-2.3888	zgc:158412	zgc:158412
110437736	-0.41654	3.6796	-3.4685	0.0061952	0.13656	-2.3893	LOC110437736	neuropilin and tolloid-like protein 1
562075	0.50616	4.8589	3.4682	0.0061982	0.13656	-2.3898	zgc:154046	zgc:154046
562261	0.40063	2.5609	3.4664	0.0062171	0.13681	-2.3928	aig1	androgen-induced 1 (H. sapiens)
373882	0.4006	5.8448	3.4651	0.0062301	0.13682	-2.3949	mmp14a	matrix metallopeptidase 14a (membrane-inserted)
393747	0.34896	5.7493	3.4649	0.0062327	0.13682	-2.3953	rmnd5b	required for meiotic nuclear division 5 homolog B
321502	0.70486	2.4211	3.4614	0.0062685	0.13743	-2.401	krt96	keratin 96
393530	0.66482	5.0408	3.4607	0.0062754	0.13743	-2.4021	mybpha	myosin binding protein Ha
493602	-0.53313	4.1948	-3.4576	0.0063078	0.13782	-2.4072	asah2	N-acylsphingosine amidohydrolase 2
565343	0.34664	5.0862	3.4574	0.00631	0.13782	-2.4076	tm7sf3	transmembrane 7 superfamily member 3
445114	-0.41666	4.9555	-3.4564	0.0063207	0.13782	-2.4093	cdk5r2b	"cyclin-dependent kinase 5, regulatory subunit 2b (p39)"
558154	0.42716	4.9265	3.4558	0.0063275	0.13782	-2.4103	vegfab	vascular endothelial growth factor Ab
334420	0.45117	5.7368	3.4554	0.0063316	0.13782	-2.411	ugp2b	UDP-glucose pyrophosphorylase 2b
572649	0.62039	6.1031	3.448	0.0064095	0.13935	-2.4232	bbox1	"butyrobetaine (gamma), 2-oxoglutarate dioxygenase (gamma-butyrobetaine hydroxylase) 1"
368924	-0.64163	8.6783	-3.4448	0.0064437	0.13965	-2.4284	fkbp5	FKBP prolyl isomerase 5
678543	-0.56179	2.9527	-3.4439	0.0064528	0.13965	-2.4299	zgc:136858	zgc:136858
101885512	0.75791	2.9849	3.443	0.0064626	0.13965	-2.4314	LOC101885512	apoptosis facilitator Bcl-2-like protein 14
751644	-1.0646	-0.66393	-3.4429	0.0064638	0.13965	-2.4316	wnt9a	"wingless-type MMTV integration site family, member 9A"
560126	0.48063	3.3544	3.4423	0.0064702	0.13965	-2.4325	naglu	"N-acetylglucosaminidase, alpha"
335916	0.72769	7.0368	3.4421	0.0064727	0.13965	-2.4329	jun	"Jun proto-oncogene, AP-1 transcription factor subunit"
100334955	0.82919	1.8043	3.4416	0.0064778	0.13965	-2.4337	vstm5	V-set and transmembrane domain containing 5
368481	0.83787	1.1375	3.4383	0.0065131	0.14025	-2.4391	stat1b	signal transducer and activator of transcription 1b
555401	-0.63819	5.0294	-3.4374	0.0065227	0.14028	-2.4406	aoc1	amine oxidase copper containing 1
100535309	-0.42105	5.7503	-3.4352	0.006547	0.14051	-2.4443	vgf	VGF nerve growth factor inducible
565718	-0.43988	1.8229	-3.435	0.0065489	0.14051	-2.4446	mtnr1ab	melatonin receptor 1A b
559970	-0.47201	3.4866	-3.4334	0.0065672	0.14067	-2.4473	si:dkey-205h13.1	si:dkey-205h13.1
100330359	-0.59563	0.028604	-3.4329	0.0065719	0.14067	-2.448	tmem196b	transmembrane protein 196b
406424	-0.4362	4.4272	-3.4315	0.0065869	0.14083	-2.4503	slc22a2	solute carrier family 22 member 2
192329	-0.32696	6.6709	-3.4303	0.0066008	0.14096	-2.4524	ppp1r10	"protein phosphatase 1, regulatory subunit 10"
557409	-1.2208	0.9578	-3.4259	0.0066495	0.14183	-2.4597	zgc:198329	zgc:198329
337459	0.4154	2.8133	3.4247	0.0066622	0.14183	-2.4616	cfap97	cilia and flagella associated protein 97
108004542	0.92941	3.9351	3.4244	0.0066652	0.14183	-2.4621	rbp7a	"retinol binding protein 7a, cellular"
322660	-0.90994	3.5912	-3.4222	0.0066895	0.14218	-2.4657	upb1	"ureidopropionase, beta"
30757	1.6914	1.6484	3.4174	0.006744	0.14313	-2.4738	mhc1uba	major histocompatibility complex class I UBA
550481	0.37416	6.2256	3.4157	0.0067622	0.14313	-2.4764	rhoub	ras homolog family member Ub
795321	-0.36804	4.1211	-3.4153	0.0067674	0.14313	-2.4772	si:ch211-202f5.3	si:ch211-202f5.3
100003543	1.2773	-1.0346	3.4152	0.0067687	0.14313	-2.4774	spdef	SAM pointed domain containing ETS transcription factor
101884653	-0.54764	1.1241	-3.4147	0.0067741	0.14313	-2.4782	LOC101884653	gastrula zinc finger protein XlCGF57.1-like
791202	0.6303	3.6302	3.4138	0.0067838	0.14314	-2.4796	vhl	von Hippel-Lindau tumor suppressor
100216326	0.33934	3.9218	3.4132	0.0067904	0.14314	-2.4806	frem1a	Fras1 related extracellular matrix 1a
100334289	0.55907	4.3091	3.4123	0.0068009	0.14319	-2.4821	map3k15	mitogen-activated protein kinase kinase kinase 15
493916	0.64175	6.4357	3.4043	0.0068919	0.1447	-2.4953	pygl	"phosphorylase, glycogen, liver"
373102	0.72537	7.5202	3.4037	0.0068991	0.1447	-2.4964	mcl1b	"MCL1 apoptosis regulator, BCL2 family member b"
30356	-0.74435	0.63204	-3.4027	0.0069104	0.1447	-2.498	or101-1	"odorant receptor, family B, subfamily 101, member 1"
30129	0.39621	4.0195	3.4022	0.0069159	0.1447	-2.4988	dmrt2a	doublesex and mab-3 related transcription factor 2a
556920	-3.2272	-1.9745	-3.4021	0.0069177	0.1447	-2.499	slc19a3b	solute carrier family 19 member 3b
110438249	1.2761	-1.0067	3.4018	0.0069207	0.1447	-2.4995	LOC110438249	prolyl 4-hydroxylase subunit alpha-2-like
795538	-0.50474	2.9259	-3.3967	0.0069803	0.14559	-2.508	zgc:154058	zgc:154058
797090	0.59679	1.1518	3.3965	0.0069817	0.14559	-2.5082	fuz	fuzzy planar cell polarity protein
406739	-0.53532	5.9226	-3.396	0.0069875	0.14559	-2.509	pla2g12b	"phospholipase A2, group XIIB"
406465	-0.57557	4.813	-3.3914	0.0070419	0.14627	-2.5167	slc37a4a	solute carrier family 37 member 4a
560131	0.29852	4.9374	3.391	0.0070465	0.14627	-2.5174	mtss1	MTSS I-BAR domain containing 1
503587	2.2137	-3.8616	3.3909	0.0070479	0.14627	-2.5176	crygs1	"crystallin, gamma S1"
140613	0.57539	4.7733	3.39	0.0070582	0.14627	-2.519	her9	hairy-related 9
558777	0.47683	4.1391	3.3898	0.0070606	0.14627	-2.5194	macc1	MET transcriptional regulator MACC1
561326	1.0741	0.55863	3.3891	0.0070691	0.14628	-2.5206	gfral	GDNF family receptor alpha like
100004331	0.49524	4.7974	3.3877	0.0070855	0.14645	-2.5229	hal	histidine ammonia-lyase
503529	-2.69	-1.8567	-3.3852	0.0071152	0.14688	-2.527	zgc:113691	zgc:113691
558499	-0.37084	6.4102	-3.3845	0.0071227	0.14688	-2.5281	chka	choline kinase alpha
394068	0.45296	5.0399	3.383	0.0071411	0.14709	-2.5306	tnni2a.2	"troponin I type 2a (skeletal, fast), tandem duplicate 2"
100537530	2.5968	-1.4465	3.3819	0.0071539	0.14719	-2.5324	LOC100537530	gastrula zinc finger protein XlCGF8.2DB-like
100001360	0.5025	3.4986	3.3811	0.0071635	0.14722	-2.5337	si:dkeyp-110a12.4	si:dkeyp-110a12.4
563976	0.28906	5.5884	3.3795	0.0071823	0.14743	-2.5363	wipf2a	"WAS/WASL interacting protein family, member 2a"
562814	1.9048	-2.951	3.3787	0.0071924	0.14743	-2.5377	trim35-19	tripartite motif containing 35-19
436612	0.53595	6.2599	3.3782	0.0071985	0.14743	-2.5386	cldn7a	claudin 7a
378444	-0.57825	3.4279	-3.3737	0.0072525	0.14765	-2.546	gjd2b	gap junction protein delta 2b
100334878	0.80407	1.0718	3.3735	0.0072544	0.14765	-2.5463	si:ch211-196c10.13	si:ch211-196c10.13
492331	-0.61688	6.7507	-3.3734	0.0072559	0.14765	-2.5465	ace2	angiotensin I converting enzyme 2
30648	0.69704	3.5837	3.3727	0.0072647	0.14765	-2.5477	psme1	proteasome activator subunit 1
541364	0.4813	3.6812	3.3725	0.0072674	0.14765	-2.5481	zgc:113333	zgc:113333
445059	0.42299	3.5455	3.3719	0.0072743	0.14765	-2.549	adprh	ADP-ribosylarginine hydrolase
791134	0.35363	4.7981	3.3716	0.0072774	0.14765	-2.5494	vps8	VPS8 subunit of CORVET complex
368326	-0.52421	2.8569	-3.3703	0.0072938	0.14765	-2.5517	il13ra2	"interleukin 13 receptor, alpha 2"
406454	0.60811	8.8354	3.3697	0.0073005	0.14765	-2.5526	epcam	epithelial cell adhesion molecule
100536704	-0.79231	4.5886	-3.3697	0.0073013	0.14765	-2.5527	cdhr2	cadherin related family member 2
393312	-0.80397	0.76598	-3.3695	0.0073037	0.14765	-2.553	slc25a27	solute carrier family 25 member 27
550435	-0.72606	0.64866	-3.3691	0.0073076	0.14765	-2.5535	rfesd	Rieske (Fe-S) domain containing
492520	0.50223	6.4938	3.3676	0.007326	0.14786	-2.556	pgrmc1	progesterone receptor membrane component 1
30574	0.45381	3.8458	3.367	0.0073344	0.14786	-2.5572	dlx2a	distal-less homeobox 2a
100002189	-2.8428	-4.2025	-3.3656	0.0073514	0.14804	-2.5595	ghrhr2	growth hormone releasing hormone receptor 2
798778	0.50213	3.0387	3.3641	0.0073697	0.14824	-2.5619	r3hcc1	R3H domain and coiled-coil containing 1
101886648	-1.8894	-0.81505	-3.3625	0.0073887	0.14841	-2.5645	LOC101886648	protein FAM111A-like
563316	0.51525	4.0591	3.3618	0.0073979	0.14841	-2.5657	ap3b1a	adaptor related protein complex 3 subunit beta 1a
337315	-0.54161	6.8116	-3.3614	0.0074029	0.14841	-2.5664	fgb	fibrinogen beta chain
555218	-1.4927	0.88549	-3.3603	0.0074167	0.14852	-2.5682	oatx	organic anion transporter X
100134976	1.005	0.14683	3.359	0.0074321	0.14866	-2.5703	il21r.1	"interleukin 21 receptor, tandem duplicate 1"
436917	0.42695	5.1781	3.3584	0.0074401	0.14866	-2.5714	notum1b	"notum, palmitoleoyl-protein carboxylesterase b"
474322	-2.8009	-1.1037	-3.357	0.0074567	0.14883	-2.5736	zgc:92590	zgc:92590
567654	0.50944	4.0139	3.3529	0.0075089	0.1497	-2.5805	si:dkey-125i10.3	si:dkey-125i10.3
436933	0.40049	8.4617	3.3513	0.0075286	0.14993	-2.5831	sesn1	sestrin 1
565312	0.54471	2.0264	3.3492	0.0075554	0.1503	-2.5866	irgq1	"immunity-related GTPase family, q1"
557764	0.45931	2.7195	3.3474	0.007578	0.15058	-2.5896	megf6b	multiple EGF-like-domains 6b
100009638	-0.97081	3.823	-3.345	0.0076074	0.15084	-2.5935	zgc:153932	zgc:153932
563257	0.38034	5.0128	3.345	0.0076078	0.15084	-2.5935	lonp1	"lon peptidase 1, mitochondrial"
553524	0.35055	5.0407	3.3348	0.0077393	0.15328	-2.6105	b4galnt3b	"beta-1,4-N-acetyl-galactosaminyl transferase 3b"
100001692	-0.60325	2.2858	-3.3333	0.0077587	0.1535	-2.613	nr0b1	"nuclear receptor subfamily 0, group B, member 1"
557488	-0.99063	-0.46726	-3.3301	0.0078002	0.15398	-2.6183	si:ch211-266a5.12	si:ch211-266a5.12
327417	0.52667	6.7376	3.33	0.0078004	0.15398	-2.6183	hsd17b12a	hydroxysteroid (17-beta) dehydrogenase 12a
402928	1.0073	1.6467	3.3269	0.0078419	0.15463	-2.6236	sp6	Sp6 transcription factor
282671	-0.61654	3.079	-3.3249	0.0078679	0.15484	-2.6269	f7i	coagulation factor VIIi
449535	1.2779	-4.6834	3.3247	0.0078698	0.15484	-2.6271	nitr7b	novel immune-type receptor 7b
403033	0.90901	6.2477	3.3233	0.0078892	0.15506	-2.6296	ccn1	cellular communication network factor 1
100037379	1.0496	1.3896	3.3217	0.0079102	0.1553	-2.6322	zgc:163061	zgc:163061
393327	-0.95835	1.2134	-3.3192	0.0079427	0.1557	-2.6363	proca	"protein C (inactivator of coagulation factors Va and VIIIa), a"
562916	-1.0658	3.9289	-3.3189	0.0079476	0.1557	-2.6369	a1cf	apobec1 complementation factor
393501	0.59678	1.5186	3.3144	0.0080065	0.15668	-2.6442	marveld3	MARVEL domain containing 3
561028	1.1265	0.40477	3.3091	0.0080789	0.15792	-2.6531	b3gnt3.3	"UDP-GlcNAc:betaGal beta-1,3-N-acetylglucosaminyltransferase 3, tandem duplicate 3"
406431	0.46453	5.3926	3.3068	0.0081096	0.15835	-2.6569	prrx1a	paired related homeobox 1a
393155	0.38244	4.043	3.3035	0.0081546	0.15902	-2.6624	osgn1	oxidative stress induced growth inhibitor 1
797812	-0.38781	3.7019	-3.303	0.0081616	0.15902	-2.6632	lrfn2	leucine rich repeat and fibronectin type III domain containing 2
393511	-0.80266	2.6543	-3.301	0.0081882	0.15937	-2.6665	stc1l	"stanniocalcin 1, like"
30194	0.35511	6.4494	3.299	0.0082164	0.15972	-2.6699	alcama	activated leukocyte cell adhesion molecule a
110437906	1.2807	0.31041	3.2984	0.008224	0.15972	-2.6708	LOC110437906	serine/threonine-protein kinase pim-3-like
492350	0.55191	3.3088	3.2951	0.0082692	0.16029	-2.6762	s1pr5a	sphingosine-1-phosphate receptor 5a
100008541	-0.50547	5.7054	-3.295	0.008271	0.16029	-2.6764	tdo2a	"tryptophan 2,3-dioxygenase a"
100150478	-2.4798	-3.897	-3.2881	0.0083666	0.1619	-2.6878	or116-1	"odorant receptor, family F, subfamily 116, member 1"
100034635	0.44922	2.2446	3.2867	0.0083874	0.1619	-2.6903	sync	"syncoilin, intermediate filament protein"
564868	0.52053	2.8567	3.2861	0.0083956	0.1619	-2.6913	soat2	sterol O-acyltransferase 2
794891	-1.2207	0.14341	-3.286	0.0083974	0.1619	-2.6915	ccl19a.1	"chemokine (C-C motif) ligand 19a, tandem duplicate 1"
568839	-1.3804	0.66512	-3.2849	0.0084124	0.1619	-2.6933	loxl3a	lysyl oxidase-like 3a
798310	0.41706	2.4241	3.2841	0.0084232	0.1619	-2.6945	si:dkey-34k9.3	si:dkey-34k9.3
403114	0.86928	1.3746	3.2837	0.0084288	0.1619	-2.6952	adm2a	adrenomedullin 2a
795554	-0.7424	0.78734	-3.2835	0.0084321	0.1619	-2.6956	si:ch211-226h8.14	si:ch211-226h8.14
393845	-0.39994	8.5144	-3.2833	0.0084349	0.1619	-2.6959	pde6c	"phosphodiesterase 6C, cGMP-specific, cone, alpha prime"
378737	0.31412	3.9784	3.2807	0.0084713	0.1623	-2.7002	fbxl2	F-box and leucine-rich repeat protein 2
794084	-0.39919	3.0686	-3.2797	0.0084857	0.1623	-2.7019	gpx9	glutathione peroxidase 9
553618	-0.85422	1.261	-3.2783	0.0085053	0.1623	-2.7042	zgc:110410	zgc:110410
100499491	-0.50574	4.7928	-3.2781	0.0085081	0.1623	-2.7045	rltgr	RAMP-like triterpene glycoside receptor
100149185	-0.94451	0.954	-3.278	0.0085093	0.1623	-2.7046	cntf	ciliary neurotrophic factor
405873	-0.4774	3.4178	-3.278	0.0085102	0.1623	-2.7047	mycla	"MYCL proto-oncogene, bHLH transcription factor a"
794259	0.43235	3.66	3.2774	0.0085186	0.1623	-2.7057	aclyb	ATP citrate lyase b
325958	0.43715	5.1598	3.274	0.0085674	0.16305	-2.7114	tsku	tsukushi small leucine rich proteoglycan homolog (Xenopus laevis)
566908	-1.9687	-2.6789	-3.2715	0.0086026	0.1635	-2.7154	rce1b	Ras converting CAAX endopeptidase 1b
321460	0.42498	6.7326	3.2706	0.0086168	0.1635	-2.7171	ist1	IST1 factor associated with ESCRT-III
100150046	-0.64101	3.202	-3.2699	0.0086262	0.1635	-2.7181	si:ch73-6k14.2	si:ch73-6k14.2
678605	0.61199	2.9701	3.2699	0.008627	0.1635	-2.7182	crfb12	cytokine receptor family member B12
431748	0.64304	3.8509	3.2686	0.0086448	0.16366	-2.7203	dbnla	drebrin-like a
797363	-0.40206	3.2098	-3.2679	0.0086558	0.1637	-2.7215	si:dkey-26i13.8	si:dkey-26i13.8
100332225	-0.84593	0.7478	-3.2669	0.0086704	0.1638	-2.7232	col28a1b	"collagen, type XXVIII, alpha 1b"
555721	-0.42523	5.4466	-3.2646	0.0087036	0.16426	-2.727	sall1a	spalt-like transcription factor 1a
30390	-3.3342	-3.7332	-3.2625	0.008734	0.16451	-2.7304	cyp19a1a	"cytochrome P450, family 19, subfamily A, polypeptide 1a"
570516	0.29745	3.6399	3.2624	0.0087355	0.16451	-2.7306	rgs12a	regulator of G protein signaling 12a
567592	0.47377	4.2039	3.2617	0.0087461	0.16454	-2.7318	smpd5	sphingomyelin phosphodiesterase 5
569483	0.4312	4.0158	3.2601	0.0087684	0.16479	-2.7343	tmppe	transmembrane protein with metallophosphoesterase domain
108191519	-1.0404	-0.080475	-3.2593	0.0087803	0.16484	-2.7357	LOC108191519	trace amine-associated receptor 13c-like
100148922	-0.64201	6.1667	-3.2572	0.008812	0.16526	-2.7393	si	sucrase-isomaltase (alpha-glucosidase)
393733	-0.72462	2.5811	-3.2565	0.0088224	0.16529	-2.7404	fgf1a	fibroblast growth factor 1a
799862	0.51087	4.9038	3.2556	0.008835	0.1653	-2.7418	si:ch1073-291c23.2	si:ch1073-291c23.2
100536291	-0.96443	1.4034	-3.2552	0.0088417	0.1653	-2.7426	zmp:0000000634	zmp:0000000634
559906	0.43561	5.5328	3.2525	0.008882	0.16572	-2.7471	si:ch211-243g18.2	si:ch211-243g18.2
101885045	-0.42211	4.975	-3.2524	0.0088825	0.16572	-2.7471	si:ch73-43g23.1	si:ch73-43g23.1
553483	0.44181	3.7591	3.2445	0.0090012	0.16771	-2.7603	haus7	"HAUS augmin-like complex, subunit 7"
564619	0.51301	6.8582	3.2441	0.0090073	0.16771	-2.761	gstr	glutathione S-transferase rho
796659	-0.61669	2.1999	-3.2432	0.0090215	0.1678	-2.7625	dnajc22	"DnaJ (Hsp40) homolog, subfamily C, member 22"
796210	-2.411	-2.2709	-3.2419	0.0090406	0.16798	-2.7646	LOC796210	disks large-associated protein 2
568458	0.31208	5.8556	3.2345	0.0091535	0.16982	-2.7769	fam83b	family with sequence similarity 83 member B
436716	-0.56481	9.3494	-3.234	0.0091623	0.16982	-2.7779	opn1lw2	"opsin 1 (cone pigments), long-wave-sensitive, 2"
492810	-0.63769	2.3673	-3.2335	0.0091695	0.16982	-2.7786	mfsd2aa	major facilitator superfamily domain containing 2aa
100007759	-1.895	-0.58402	-3.233	0.0091776	0.16982	-2.7795	ccn5	cellular communication network factor 5
566257	0.52582	2.7531	3.2321	0.0091914	0.1699	-2.781	si:dkeyp-23e4.3	si:dkeyp-23e4.3
101885050	2.2062	-3.1519	3.2305	0.0092157	0.17018	-2.7836	si:dkey-6f10.5	si:dkey-6f10.5
567267	0.53527	1.6334	3.2293	0.0092337	0.17034	-2.7855	kcnv2a	"potassium channel, subfamily V, member 2a"
445319	-0.61293	5.0538	-3.2284	0.0092484	0.17034	-2.7871	ncaldb	neurocalcin delta b
553433	-0.35496	5.3427	-3.2279	0.0092552	0.17034	-2.7879	pisd	phosphatidylserine decarboxylase
403070	-0.4061	3.9213	-3.227	0.0092706	0.17034	-2.7895	rgn	regucalcin
30070	-0.69435	2.1322	-3.2269	0.0092718	0.17034	-2.7896	tbx4	T-box transcription factor 4
569090	-0.31466	4.9665	-3.2261	0.0092836	0.17038	-2.7909	ngef	neuronal guanine nucleotide exchange factor
560308	-0.67522	3.8105	-3.2255	0.0092932	0.17039	-2.7919	serpinf2a	"serpin peptidase inhibitor, clade F (alpha-2 antiplasmin, pigment epithelium derived factor), member 2a"
406290	-0.46199	4.8587	-3.2243	0.0093128	0.17057	-2.794	itpk1a	inositol-tetrakisphosphate 1-kinase a
558552	-1.4676	-0.10144	-3.2235	0.0093245	0.17061	-2.7952	tubb1	"tubulin, beta 1 class VI"
378713	0.38189	7.4829	3.2222	0.0093443	0.17075	-2.7973	tktb	transketolase b
322331	-0.67264	3.892	-3.2218	0.0093509	0.17075	-2.798	ephx5	epoxide hydrolase 5
110437705	-2.2028	-0.34911	-3.2196	0.0093853	0.17117	-2.8017	LOC110437705	uncharacterized LOC110437705
393481	-1.3294	2.857	-3.2191	0.0093931	0.17117	-2.8025	cyp2k6	"cytochrome P450, family 2, subfamily K, polypeptide 6"
325939	-2.5935	-3.768	-3.2178	0.0094149	0.1714	-2.8048	cyp2x12	"cytochrome P450, family 2, subfamily X, polypeptide 12"
565964	-0.36237	2.1355	-3.2146	0.0094652	0.17206	-2.8101	sdr42e1	"short chain dehydrogenase/reductase family 42E, member 1"
568191	1.1115	0.22505	3.2142	0.0094715	0.17206	-2.8107	wnt5a	"wingless-type MMTV integration site family, member 5a"
100270759	0.90729	-1.0184	3.2136	0.0094815	0.17206	-2.8118	csf3a	colony stimulating factor 3 (granulocyte) a
568585	0.45258	2.9257	3.2131	0.0094895	0.17206	-2.8126	trip4	thyroid hormone receptor interactor 4
557783	-0.61794	1.6631	-3.2113	0.0095173	0.17237	-2.8155	si:ch211-195b15.7	si:ch211-195b15.7
403148	-0.9319	-1.9721	-3.2108	0.0095257	0.17237	-2.8164	tirap	toll-interleukin 1 receptor (TIR) domain containing adaptor protein
568666	0.43456	2.6277	3.2096	0.0095446	0.17254	-2.8183	atp13a2	ATPase cation transporting 13A2
286831	0.35841	4.7681	3.2079	0.0095729	0.17277	-2.8213	lamb4	"laminin, beta 4"
436989	-0.61514	2.0562	-3.2076	0.0095764	0.17277	-2.8216	allc	allantoicase
768138	-0.69889	0.85698	-3.2052	0.009615	0.17315	-2.8256	ebpl	EBP like
566757	0.4133	3.7236	3.2051	0.009617	0.17315	-2.8258	afap1l1a	actin filament associated protein 1-like 1a
565122	-0.36846	5.2605	-3.2042	0.0096321	0.17317	-2.8274	si:dkey-172j4.3	si:dkey-172j4.3
100334206	-0.54885	4.0574	-3.2034	0.0096445	0.17317	-2.8286	kctd5b	potassium channel tetramerization domain containing 5b
324556	0.50312	7.0217	3.2033	0.0096465	0.17317	-2.8288	taldo1	transaldolase 1
100005854	-1.3135	-0.58043	-3.2024	0.0096619	0.17324	-2.8304	zgc:194242	zgc:194242
30288	0.64739	4.9519	3.2019	0.0096699	0.17324	-2.8312	her6	hairy-related 6
327284	-0.5327	3.6577	-3.1995	0.0097076	0.17374	-2.8351	lgals9l3	"lectin, galactoside-binding, soluble, 9 (galectin 9)-like 3"
101885757	0.37227	4.0361	3.1983	0.0097286	0.17395	-2.8372	LOC101885757	5-hydroxytryptamine receptor 3A-like
791453	0.4904	5.7019	3.1955	0.0097742	0.17459	-2.8418	mhc1zba	major histocompatibility complex class I ZBA
568283	-0.3614	6.111	-3.1936	0.0098047	0.17496	-2.8449	larp4ab	La ribonucleoprotein 4Ab
563972	-0.63084	5.285	-3.1926	0.0098217	0.17509	-2.8466	gstt1a	glutathione S-transferase theta 1a
562372	0.39375	5.2249	3.1912	0.0098445	0.1752	-2.8489	snx18a	sorting nexin 18a
559610	0.70408	2.4668	3.191	0.0098487	0.1752	-2.8494	ifi35	interferon-induced protein 35
100148465	-0.45044	4.4083	-3.1905	0.0098571	0.1752	-2.8502	malrd1	MAM and LDL receptor class A domain containing 1
559531	0.39282	4.1446	3.1874	0.0099085	0.17578	-2.8553	mxd4	MAX dimerization protein 4
566185	1.4831	1.5884	3.1873	0.0099093	0.17578	-2.8554	caspbl	"caspase b, like"
798369	0.65711	1.6251	3.1855	0.0099398	0.17615	-2.8585	mamdc2b	MAM domain containing 2b
322506	0.43818	6.2431	3.1848	0.0099508	0.17617	-2.8596	nqo1	"NAD(P)H dehydrogenase, quinone 1"
792904	-0.80089	-0.46677	-3.1837	0.0099702	0.17634	-2.8615	si:ch73-139e5.2	si:ch73-139e5.2
406347	-0.36906	5.4776	-3.1822	0.0099953	0.17636	-2.864	slc35e1	solute carrier family 35 member E1
406397	0.79881	5.8329	3.1802	0.010028	0.17636	-2.8672	mmp9	matrix metallopeptidase 9
548604	0.94172	6.0124	3.18	0.010033	0.17636	-2.8677	nr4a3	"nuclear receptor subfamily 4, group A, member 3"
30739	0.43849	5.5065	3.1797	0.010038	0.17636	-2.8682	tgfbr2b	transforming growth factor beta receptor 2b
100331219	2.0548	-2.403	3.1793	0.010044	0.17636	-2.8688	LOC100331219	gastrula zinc finger protein XlCGF57.1-like
556024	0.6333	2.0565	3.1786	0.010056	0.17636	-2.8699	mov10b.1	"Moloney leukemia virus 10b, tandem duplicate 1"
566074	-0.60433	2.3496	-3.1785	0.010057	0.17636	-2.8701	si:ch211-199g17.2	si:ch211-199g17.2
108190403	-0.74793	3.8174	-3.178	0.010066	0.17636	-2.871	LOC108190403	unconventional myosin-VIIb-like
100001978	-0.55772	1.8831	-3.1779	0.010068	0.17636	-2.8711	sftpbb	surfactant protein Bb
100537130	1.8614	-2.4212	3.1778	0.01007	0.17636	-2.8713	si:ch211-278p9.2	si:ch211-278p9.2
101882850	-1.016	-0.024877	-3.1772	0.010079	0.17636	-2.8722	htr4	5-hydroxytryptamine receptor 4
100006494	0.69951	1.4982	3.1767	0.010089	0.17636	-2.8732	mycbpap	mycbp associated protein
393318	0.56375	4.201	3.1747	0.010123	0.17678	-2.8765	tmem54a	transmembrane protein 54a
30138	0.44122	4.276	3.1735	0.010142	0.17694	-2.8783	dld	deltaD
437006	0.32608	5.2327	3.173	0.010151	0.17694	-2.8793	nxph1	neurexophilin 1
550542	0.71613	2.815	3.1712	0.010182	0.1773	-2.8822	chmp4c	charged multivesicular body protein 4C
797731	2.1484	-2.6069	3.1685	0.010229	0.17794	-2.8868	irgf3	"immunity-related GTPase family, f3"
103911950	-0.49266	2.4275	-3.1672	0.010251	0.17815	-2.8889	LOC103911950	"sushi, nidogen and EGF-like domain-containing protein 1"
321836	0.44748	3.7657	3.1658	0.010275	0.17829	-2.8913	krit1	KRIT1 ankyrin repeat containing
103909608	0.33581	7.2955	3.1645	0.010297	0.17829	-2.8934	wu:fb80c09	wu:fb80c09
334455	0.3448	4.0157	3.1645	0.010298	0.17829	-2.8935	exd2	exonuclease 3'-5' domain containing 2
436926	-0.734	5.1536	-3.1636	0.010313	0.17829	-2.8949	serpinb1	"serpin peptidase inhibitor, clade B (ovalbumin), member 1"
557645	-0.35712	2.5858	-3.1628	0.010326	0.17829	-2.8962	sstr1b	somatostatin receptor 1b
337730	0.58542	3.8507	3.1628	0.010327	0.17829	-2.8962	capn8	calpain 8
30250	0.38269	4.8905	3.1628	0.010328	0.17829	-2.8963	sema3d	"sema domain, immunoglobulin domain (Ig), short basic domain, secreted, (semaphorin) 3D"
100151358	0.34367	3.0222	3.1622	0.010337	0.17829	-2.8972	gsap	gamma-secretase activating protein
30473	-0.67718	2.0462	-3.161	0.010358	0.17841	-2.8992	rx2	retinal homeobox gene 2
563962	1.3137	-0.37419	3.1607	0.010364	0.17841	-2.8998	slc26a3.1	solute carrier family 26 member 3
797776	0.65446	4.925	3.1584	0.010404	0.17892	-2.9036	si:ch211-133n4.6	si:ch211-133n4.6
103908620	0.33361	3.8936	3.1572	0.010425	0.17911	-2.9056	LOC103908620	CD59A glycoprotein-like
567984	2.4891	-3.6123	3.1557	0.010451	0.17929	-2.908	ftr37	"finTRIM family, member 37"
494071	0.41879	4.0346	3.155	0.010464	0.17929	-2.9093	irf2	interferon regulatory factor 2
393650	0.5421	2.9412	3.1549	0.010465	0.17929	-2.9094	irf7	interferon regulatory factor 7
260350	0.47318	1.9584	3.1525	0.010508	0.17978	-2.9134	has2	hyaluronan synthase 2
405768	-0.35822	5.0962	-3.1522	0.010514	0.17978	-2.9139	LOC405768	protein kinase Npk
266794	0.54337	6.6958	3.1489	0.010571	0.18045	-2.9193	ccng2	cyclin G2
100000389	0.62936	4.2336	3.1488	0.010573	0.18045	-2.9195	si:ch73-347e22.8	si:ch73-347e22.8
359831	0.47881	2.8546	3.1469	0.010608	0.18087	-2.9227	fgf24	fibroblast growth factor 24
326283	-0.5117	3.5414	-3.1457	0.010629	0.18106	-2.9247	smad3b	SMAD family member 3b
791194	-0.93175	1.2029	-3.1442	0.010656	0.18135	-2.9272	ogg1	8-oxoguanine DNA glycosylase
492803	0.48571	3.5532	3.1423	0.010691	0.18177	-2.9304	pitpnc1b	phosphatidylinositol transfer protein cytoplasmic 1b
564099	0.38771	4.7616	3.1411	0.010712	0.1819	-2.9324	si:ch211-196i2.1	si:ch211-196i2.1
798445	0.73849	0.8105	3.1403	0.010725	0.1819	-2.9336	LOC798445	caspase-3-like
555981	-1.9965	-1.6265	-3.1401	0.010729	0.1819	-2.9339	zgc:193807	zgc:193807
431726	0.40035	4.387	3.1386	0.010757	0.18219	-2.9366	tmem30b	transmembrane protein 30B
768133	-0.37094	4.5618	-3.1381	0.010766	0.18219	-2.9374	ezh2	enhancer of zeste 2 polycomb repressive complex 2 subunit
560569	0.35356	2.8235	3.1345	0.010832	0.18314	-2.9434	zgc:162964	zgc:162964
403029	0.34655	3.0832	3.1331	0.010857	0.18338	-2.9456	pofut1	protein O-fucosyltransferase 1
101882192	-0.5406	2.2402	-3.1312	0.010891	0.1837	-2.9488	zbtb38	zinc finger and BTB domain containing 38
555631	-0.40792	1.7751	-3.131	0.010896	0.1837	-2.9492	si:ch73-196l6.5	si:ch73-196l6.5
777623	-0.42575	5.0719	-3.1267	0.010975	0.18473	-2.9564	zgc:154093	zgc:154093
405769	-0.31587	3.7589	-3.1261	0.010986	0.18473	-2.9573	syk	spleen tyrosine kinase
101884180	-0.37894	4.3107	-3.1256	0.010995	0.18473	-2.9582	si:ch211-103f14.3	si:ch211-103f14.3
393360	0.56851	2.8315	3.1251	0.011005	0.18473	-2.9591	stn1	STN1 subunit of CST complex
436886	0.41668	4.5931	3.1249	0.011008	0.18473	-2.9593	nrbf2b	nuclear receptor binding factor 2b
140811	0.43052	8.2863	3.1236	0.011033	0.18481	-2.9615	psap	prosaposin
560629	0.54028	2.8172	3.1235	0.011033	0.18481	-2.9616	si:dkey-119m7.4	si:dkey-119m7.4
393577	0.40254	5.5318	3.1229	0.011045	0.18484	-2.9627	cisd1	CDGSH iron sulfur domain 1
641479	0.62407	2.4091	3.1209	0.011082	0.18528	-2.9659	ugt5a1	"UDP glucuronosyltransferase 5 family, polypeptide A1"
553553	-0.65598	5.524	-3.1188	0.011122	0.18577	-2.9694	cfd	complement factor D (adipsin)
560945	0.36274	6.4286	3.1175	0.011147	0.18585	-2.9717	myh7bb	"myosin, heavy chain 7B, cardiac muscle, beta b"
767667	0.59018	1.2935	3.1175	0.011147	0.18585	-2.9717	mvb12ba	multivesicular body subunit 12Ba
567241	-0.34377	4.7676	-3.1165	0.011165	0.18598	-2.9733	lepr	leptin receptor
386634	-0.29509	8.6002	-3.1157	0.01118	0.18605	-2.9746	eif4a1a	eukaryotic translation initiation factor 4A1A
335830	0.39747	4.6433	3.1146	0.0112	0.18622	-2.9764	gas6	growth arrest-specific 6
559550	0.41175	1.2938	3.1111	0.011267	0.18689	-2.9822	si:ch211-202h22.8	si:ch211-202h22.8
327294	0.33111	6.0897	3.111	0.01127	0.18689	-2.9825	castor2	cytosolic arginine sensor for mTORC1 subunit 2
568153	0.6016	1.2303	3.1105	0.011279	0.18689	-2.9833	fpr1	formyl peptide receptor 1
494131	0.98507	0.46674	3.1101	0.011286	0.18689	-2.9839	gprc6a	"G protein-coupled receptor, class C, group 6, member A"
110437747	0.42099	3.9291	3.1098	0.011292	0.18689	-2.9845	LOC110437747	"NACHT, LRR and PYD domains-containing protein 3-like"
777793	-0.73834	4.9236	-3.1074	0.011337	0.18721	-2.9884	sult2st2	"sulfotransferase family 2, cytosolic sulfotransferase 2"
555192	-0.35337	6.1819	-3.1069	0.011347	0.18721	-2.9893	epas1b	endothelial PAS domain protein 1b
110438229	-2.1712	-3.1282	-3.1069	0.011348	0.18721	-2.9893	LOC110438229	syncollin-like
571299	0.66704	4.0266	3.1065	0.011355	0.18721	-2.99	nenf	neudesin neurotrophic factor
792410	-0.88888	-0.14484	-3.1061	0.011363	0.18721	-2.9907	ghrhrb	growth hormone releasing hormone receptor b
566647	0.82051	0.41977	3.104	0.011404	0.18766	-2.9942	cx32.2	connexin 32.2
100000836	-0.43486	2.9712	-3.1029	0.011424	0.18766	-2.9959	rps8b	ribosomal protein S8b
30685	-0.64494	2.4003	-3.1021	0.011439	0.18766	-2.9972	aanat2	arylalkylamine N-acetyltransferase 2
30646	0.37132	8.2365	3.102	0.011442	0.18766	-2.9974	gfap	glial fibrillary acidic protein
327355	-0.35645	3.9077	-3.1014	0.011454	0.18766	-2.9985	ice1	KIAA0947-like (H. sapiens)
553466	-0.8624	2.4522	-3.1012	0.011456	0.18766	-2.9987	si:dkey-90m5.4	si:dkey-90m5.4
101885237	2.3534	-0.68108	3.1004	0.011474	0.18766	-3.0002	LOC101885237	macrophage mannose receptor 1-like
497645	0.55308	5.8024	3.1003	0.011474	0.18766	-3.0003	matn3b	matrilin 3b
100037333	0.71966	2.1138	3.099	0.0115	0.18785	-3.0025	zgc:162612	zgc:162612
100006143	1.1586	-1.8219	3.0985	0.011509	0.18785	-3.0032	si:dkey-266f7.5	si:dkey-266f7.5
436640	-0.41644	2.9831	-3.0981	0.011517	0.18785	-3.004	slc25a48	solute carrier family 25 member 48
436719	0.54992	4.4275	3.0969	0.01154	0.18793	-3.0059	cldn15lb	claudin 15-like b
565385	-0.359	3.0051	-3.0962	0.011553	0.18793	-3.007	zgc:172341	zgc:172341
564977	-0.36249	5.1486	-3.0962	0.011554	0.18793	-3.0071	scn4ab	"sodium channel, voltage-gated, type IV, alpha, b"
406562	-0.26823	8.748	-3.0957	0.011564	0.18794	-3.008	anp32e	"acidic (leucine-rich) nuclear phosphoprotein 32 family, member E"
323528	-0.28977	6.1361	-3.095	0.011577	0.18794	-3.0091	dennd5b	DENN/MADD domain containing 5B
556502	0.51212	4.4344	3.0942	0.011593	0.18794	-3.0105	adma	adrenomedullin a
337767	0.30353	6.3017	3.0936	0.011606	0.18794	-3.0115	lamb2	"laminin, beta 2 (laminin S)"
571911	-0.73488	3.7819	-3.0936	0.011606	0.18794	-3.0115	fdft1	farnesyl-diphosphate farnesyltransferase 1
100006523	0.88876	3.1813	3.0918	0.01164	0.1883	-3.0144	fthl28	"ferritin, heavy polypeptide-like 28"
550399	0.77011	1.8019	3.0914	0.011649	0.1883	-3.0152	grem2b	"gremlin 2, DAN family BMP antagonist b"
795588	0.41463	5.5924	3.09	0.011676	0.18856	-3.0174	slc16a9a	solute carrier family 16 member 9a
100149352	-0.32225	3.871	-3.088	0.011715	0.18902	-3.0207	LOC100149352	gastrula zinc finger protein XlCGF49.1-like
573765	-0.30683	5.878	-3.0865	0.011745	0.18919	-3.0233	rgs5a	regulator of G protein signaling 5a
554842	-0.52246	2.6972	-3.0864	0.011746	0.18919	-3.0234	acot11a	acyl-CoA thioesterase 11a
324714	0.4892	4.4243	3.0857	0.011761	0.18926	-3.0246	styk1b	serine/threonine/tyrosine kinase 1b
553238	0.58927	3.4339	3.0846	0.011783	0.18944	-3.0264	esyt3	extended synaptotagmin-like protein 3
569206	0.42578	2.4867	3.0835	0.011805	0.18961	-3.0283	fhdc2	FH2 domain containing 2
751703	-0.55646	3.1082	-3.083	0.011816	0.18961	-3.0292	lcn15	lipocalin 15
553216	-0.80453	3.3377	-3.0825	0.011825	0.18961	-3.0299	pm20d1.1	"peptidase M20 domain containing 1, tandem duplicate 1"
561111	-1.896	-3.8797	-3.0808	0.011858	0.18992	-3.0327	si:dkey-78l4.2	si:dkey-78l4.2
780836	-0.34126	3.7655	-3.0805	0.011865	0.18992	-3.0333	opn6a	"opsin 6, group member a"
447884	-0.70287	0.9396	-3.0789	0.011897	0.19013	-3.036	tctex1d1	Tctex1 domain containing 1
566703	0.36197	5.7671	3.0788	0.0119	0.19013	-3.0361	znf395b	zinc finger protein 395b
406323	-1.0927	4.9868	-3.078	0.011916	0.19017	-3.0375	chia.1	"chitinase, acidic.1"
677757	0.42795	3.4245	3.0771	0.011934	0.19017	-3.039	mycbp	MYC binding protein
494102	-1.0752	3.0466	-3.0771	0.011934	0.19017	-3.039	dhcr24	24-dehydrocholesterol reductase
569443	0.46856	1.9955	3.0747	0.011982	0.19077	-3.043	prf1.9	perforin 1.9
101885761	0.66443	1.0206	3.0739	0.011997	0.19084	-3.0442	slc9a1a	solute carrier family 9 member A1a
100037374	0.6043	4.8871	3.0733	0.01201	0.19088	-3.0453	fgfbp2b	fibroblast growth factor binding protein 2b
337849	0.5481	2.511	3.0722	0.012031	0.19093	-3.047	mettl23	methyltransferase like 23
564021	0.45912	2.3581	3.0721	0.012035	0.19093	-3.0473	trabd2a	TraB domain containing 2A
751701	0.52822	7.3544	3.0716	0.012046	0.19094	-3.0482	ptgdsb.2	"prostaglandin D2 synthase b, tandem duplicate 2"
554137	0.48443	6.6201	3.071	0.012056	0.19094	-3.049	hbp1	HMG-box transcription factor 1
562307	2.072	-1.2986	3.0693	0.012092	0.19115	-3.0519	si:ch73-368j24.11	si:ch73-368j24.11
564588	0.42132	3.5923	3.0687	0.012103	0.19115	-3.0529	scara3	"scavenger receptor class A, member 3"
494039	-0.50777	3.6952	-3.0682	0.012113	0.19115	-3.0537	c3a.6	"complement component c3a, duplicate 6"
751675	-0.64781	0.25018	-3.0678	0.012122	0.19115	-3.0544	morn2	MORN repeat containing 2
492523	0.30375	4.232	3.0678	0.012123	0.19115	-3.0545	def8	differentially expressed in FDCP 8 homolog
140425	-0.65461	1.8533	-3.0644	0.012192	0.19208	-3.0601	gc2	guanylyl cyclase 2
567711	-1.1356	1.7098	-3.0635	0.012211	0.19221	-3.0616	si:dkey-21e2.15	si:dkey-21e2.15
565000	0.4127	2.4366	3.0599	0.012284	0.1932	-3.0675	exosc3	exosome component 3
553782	0.94795	2.2385	3.0585	0.012315	0.19351	-3.07	zgc:110425	zgc:110425
560686	-0.48414	1.7832	-3.0564	0.012357	0.19388	-3.0733	mettl4	methyltransferase like 4
560165	0.41612	5.1048	3.0559	0.012369	0.19388	-3.0743	zgc:162698	zgc:162698
100535998	0.79539	0.80053	3.0555	0.012377	0.19388	-3.0749	si:ch211-210b2.2	si:ch211-210b2.2
797943	0.68719	7.1203	3.0553	0.012381	0.19388	-3.0753	ppp1r15a	"protein phosphatase 1, regulatory subunit 15A"
393500	-0.41865	3.9142	-3.0534	0.012421	0.19433	-3.0785	dtx3	deltex E3 ubiquitin ligase 3
492474	0.43191	1.6196	3.0518	0.012455	0.19455	-3.0811	dennd2db	DENN/MADD domain containing 2Db
565651	0.69504	1.6953	3.0512	0.012467	0.19455	-3.0821	gfra4b	GDNF family receptor alpha 4b
799957	-0.40182	3.5438	-3.051	0.012471	0.19455	-3.0824	cyp2ad6	"cytochrome P450, family 2, subfamily AD, polypeptide 6"
368264	0.59852	2.7957	3.0503	0.012485	0.19455	-3.0835	npffl	neuropeptide FF-amide peptide precursor like
797371	-1.0389	1.9086	-3.0499	0.012495	0.19455	-3.0843	si:dkey-219e21.2	si:dkey-219e21.2
572207	-0.38304	8.6629	-3.0496	0.0125	0.19455	-3.0847	rcvrn3	recoverin 3
100037309	-0.31028	6.7964	-3.0474	0.012547	0.19512	-3.0884	srebf2	sterol regulatory element binding transcription factor 2
780838	-0.41745	1.3396	-3.0466	0.012565	0.19523	-3.0898	zgc:158417	zgc:158417
100000223	-0.51075	3.9246	-3.0457	0.012584	0.19531	-3.0912	si:ch211-214j8.1	si:ch211-214j8.1
449784	0.4654	2.7885	3.0453	0.012592	0.19531	-3.0919	mgst1.1	microsomal glutathione S-transferase 1.1
751736	-1.6161	-1.0791	-3.0442	0.012615	0.19549	-3.0937	ubxn10	UBX domain protein 10
368662	0.35765	1.2163	3.0434	0.012633	0.19561	-3.0951	ptf1a	pancreas associated transcription factor 1a
100007371	-1.5366	-0.22301	-3.041	0.012685	0.19624	-3.0991	c1ql4l	"complement component 1, q subcomponent-like 4 like"
556557	-0.62505	1.5352	-3.0402	0.012701	0.19632	-3.1004	zmp:0000001048	zmp:0000001048
568796	0.47366	3.356	3.038	0.012749	0.1969	-3.1041	pcdh20	protocadherin 20
336473	0.38059	8.8595	3.0365	0.012781	0.19706	-3.1066	glulb	glutamate-ammonia ligase (glutamine synthase) b
445475	0.55039	3.4162	3.0364	0.012784	0.19706	-3.1067	fhl5	four and a half LIM domains 5
100307070	0.72586	4.6715	3.036	0.012792	0.19706	-3.1074	s100a11	S100 calcium binding protein A11
553228	0.61038	2.6237	3.0345	0.012824	0.19737	-3.1098	LOC553228	gamma-glutamyl hydrolase
569464	1.1246	1.0538	3.0339	0.012837	0.19741	-3.1109	nlrp16	"NACHT, LRR and PYD domains-containing protein 16"
336613	0.27486	6.3595	3.0324	0.012871	0.19764	-3.1134	cyfip1	cytoplasmic FMR1 interacting protein 1
567242	-1.1073	3.7703	-3.0322	0.012874	0.19764	-3.1137	cnga3a	cyclic nucleotide gated channel subunit alpha 3a
100037365	0.67044	2.4475	3.0317	0.012886	0.19766	-3.1146	zgc:162611	zgc:162611
567688	-0.41045	4.3498	-3.0308	0.012905	0.19777	-3.116	si:ch211-262i1.3	si:ch211-262i1.3
323696	0.41461	5.9125	3.0297	0.012929	0.19798	-3.1179	f11r.1	"F11 receptor, tandem duplicate 1"
100536115	-0.94944	2.6681	-3.0288	0.01295	0.19813	-3.1195	fdxr	ferredoxin reductase
798580	-0.60368	2.3548	-3.0276	0.012975	0.19834	-3.1214	tmem120b	transmembrane protein 120B
777626	0.39228	4.0861	3.0269	0.012991	0.19843	-3.1226	zgc:153012	zgc:153012
100003431	0.39472	4.3295	3.023	0.013076	0.19945	-3.129	plekhb2	"pleckstrin homology domain containing, family B (evectins) member 2"
553441	-0.46239	2.3376	-3.0227	0.013083	0.19945	-3.1295	tex9	testis expressed 9
566968	-0.423	3.5652	-3.0223	0.013092	0.19945	-3.1302	mfsd2b	major facilitator superfamily domain containing 2B
405809	-0.63223	1.7101	-3.0218	0.013102	0.19945	-3.131	lgals3bpb	"lectin, galactoside-binding, soluble, 3 binding protein b"
562364	-1.5724	-4.3579	-3.0212	0.013116	0.19948	-3.132	adora4a	adenosine A4 receptor a
558540	-0.38415	3.0188	-3.0197	0.013149	0.19956	-3.1345	mybl1	v-myb avian myeloblastosis viral oncogene homolog-like 1
100005590	-2.7842	-2.8652	-3.0195	0.013154	0.19956	-3.1349	hrh2b	histamine receptor H2b
768288	-0.81929	3.1741	-3.0195	0.013154	0.19956	-3.1349	cyp2x9	"cytochrome P450, family 2, subfamily X, polypeptide 9"
101884183	-0.29119	5.0586	-3.0187	0.013173	0.19967	-3.1363	si:dkey-191g9.7	si:dkey-191g9.7
566329	-0.43081	5.1691	-3.0179	0.013191	0.19978	-3.1376	tmsb2	thymosin beta 2
798993	-0.56956	3.9548	-3.0169	0.013213	0.19994	-3.1392	abca4a	"ATP-binding cassette, sub-family A (ABC1), member 4a"
110439304	1.4638	-1.4846	3.0158	0.013238	0.20003	-3.1411	LOC110439304	5-hydroxytryptamine receptor 3A-like
553548	1.5503	-1.3367	3.0151	0.013252	0.20003	-3.1422	c1qa	"complement component 1, q subcomponent, A chain"
799271	-2.2706	-1.6374	-3.0149	0.013258	0.20003	-3.1426	nfil3-3	"nuclear factor, interleukin 3 regulated, member 3"
550528	0.51956	2.995	3.0147	0.013263	0.20003	-3.1429	baiap2l1b	BAR/IMD domain containing adaptor protein 2 like 1b
560919	-1.0641	1.9071	-3.0133	0.013293	0.20031	-3.1452	plch2b	"phospholipase C, eta 2b"
100334818	-0.37339	4.3512	-3.0124	0.013314	0.20046	-3.1467	LOC100334818	"solute carrier family 2, facilitated glucose transporter member 1-like"
503739	-0.59106	2.9517	-3.0116	0.013331	0.20055	-3.148	hsf4	heat shock transcription factor 4
334628	0.28868	6.7309	3.0109	0.013347	0.20062	-3.1492	boc	"BOC cell adhesion associated, oncogene regulated"
796436	-0.875	2.7523	-3.0097	0.013374	0.20073	-3.1512	lct	lactase
565852	0.30893	4.3937	3.0096	0.013376	0.20073	-3.1513	vps11	VPS11 core subunit of CORVET and HOPS complexes
100001838	0.96453	1.7191	3.0085	0.013402	0.20087	-3.1533	slc22a7b.2	"solute carrier family 22 member 7b, tandem duplicate 2"
171474	0.28639	5.0118	3.0082	0.013408	0.20087	-3.1536	il17rd	interleukin 17 receptor D
567640	-0.58443	4.1885	-3.0073	0.01343	0.20103	-3.1553	si:ch211-241e1.3	si:ch211-241e1.3
550346	0.82741	2.6542	3.0066	0.013444	0.20108	-3.1563	ccn1l1	"cellular communication network factor 1, like 1"
393326	0.49028	4.3175	3.0051	0.013479	0.20144	-3.1589	st3gal3a	"ST3 beta-galactoside alpha-2,3-sialyltransferase 3a"
558931	-0.40128	3.1188	-3.0034	0.013519	0.20186	-3.1618	arap3	"ArfGAP with RhoGAP domain, ankyrin repeat and PH domain 3"
567801	-1.3935	1.0227	-3.0016	0.01356	0.20231	-3.1647	serping1	"serpin peptidase inhibitor, clade G (C1 inhibitor), member 1"
100331807	-0.72216	1.8033	-2.9999	0.013599	0.20273	-3.1676	LOC100331807	pyroglutamylated RFamide peptide receptor-like
100002513	0.33884	2.7979	2.9986	0.013629	0.20301	-3.1698	ms4a17a.17	"membrane-spanning 4-domains, subfamily A, member 17A.17"
100007703	-3.1094	-2.8219	-2.9948	0.013717	0.2039	-3.1761	zgc:153921	zgc:153921
81585	0.37319	4.2506	2.9948	0.013717	0.2039	-3.1761	cldnf	claudin f
570457	-0.40855	3.4014	-2.9945	0.013723	0.2039	-3.1765	aox6	aldehyde oxidase 6
565314	-0.38435	2.7351	-2.9928	0.013763	0.20433	-3.1794	cdan1	codanin 1
560786	-1.0865	-0.74953	-2.9903	0.01382	0.20501	-3.1834	ftr27	"finTRIM family, member 27"
368220	-0.37298	5.8533	-2.9879	0.013878	0.20569	-3.1875	adka	adenosine kinase a
393232	0.5295	2.3656	2.9803	0.014058	0.20804	-3.2002	gtf3c6	"general transcription factor IIIC, polypeptide 6, alpha"
101883966	-0.60493	0.67944	-2.9802	0.014059	0.20804	-3.2003	si:dkey-24p1.7	si:dkey-24p1.7
30604	-0.48413	5.2224	-2.9792	0.014084	0.20807	-3.2021	cfb	complement factor B
140426	-0.4363	6.4308	-2.9792	0.014085	0.20807	-3.2021	gucy2d	"guanylate cyclase 2D, retinal"
566425	0.45084	4.8496	2.9781	0.014109	0.20821	-3.2038	ano10a	anoctamin 10a
110437772	2.1045	-2.2615	2.9767	0.014144	0.20821	-3.2062	ptx4	pentraxin 4
566238	2.5928	-4.0291	2.9765	0.014149	0.20821	-3.2066	zgc:165453	zgc:165453
559748	0.85654	-0.37797	2.9761	0.014158	0.20821	-3.2071	ccdc169	coiled-coil domain containing 169
321453	0.56451	9.1007	2.976	0.014161	0.20821	-3.2074	ctsla	cathepsin La
321545	-0.45541	5.7185	-2.9759	0.014163	0.20821	-3.2075	serpinc1	"serpin peptidase inhibitor, clade C (antithrombin), member 1"
797346	0.35591	5.2157	2.9743	0.0142	0.20857	-3.2101	spint1b	"serine peptidase inhibitor, Kunitz type 1 b"
100331455	-0.38152	2.3265	-2.9735	0.014221	0.20857	-3.2115	adap2	ArfGAP with dual PH domains 2
796449	-0.43401	1.9728	-2.9731	0.01423	0.20857	-3.2122	si:dkeyp-98a7.1	si:dkeyp-98a7.1
393839	-0.49621	6.8669	-2.973	0.014234	0.20857	-3.2124	scp2a	sterol carrier protein 2a
100004528	0.57243	4.4942	2.9718	0.014261	0.20859	-3.2143	LOC100004528	spidroin-2-like
403028	-0.35413	6.3219	-2.9712	0.014276	0.20859	-3.2153	slc31a1	solute carrier family 31 member 1
565039	-0.89911	0.77367	-2.971	0.014281	0.20859	-3.2157	zgc:194007	zgc:194007
555929	-0.3355	3.1863	-2.971	0.014282	0.20859	-3.2157	slc35f2	solute carrier family 35 member F2
555593	0.50316	6.162	2.9698	0.014311	0.20867	-3.2177	si:ch211-80h18.1	si:ch211-80h18.1
30175	0.5377	4.5384	2.9696	0.014314	0.20867	-3.2179	twist1a	twist family bHLH transcription factor 1a
768196	0.57774	3.4097	2.9693	0.014322	0.20867	-3.2185	me1	"malic enzyme 1, NADP(+)-dependent, cytosolic"
541392	-0.29132	4.0589	-2.9686	0.014339	0.20867	-3.2197	slc25a44b	solute carrier family 25 member 44b
108179934	-0.57651	1.4356	-2.9684	0.014345	0.20867	-3.2201	nnt2	nicotinamide nucleotide transhydrogenase 2
100149701	-0.99656	1.5625	-2.9676	0.014365	0.20871	-3.2214	LOC100149701	uncharacterized LOC100149701
436604	-0.73506	5.4287	-2.9673	0.014371	0.20871	-3.2219	uox	urate oxidase
100006043	0.34111	5.1621	2.9658	0.014408	0.20908	-3.2244	klf5a	Kruppel-like factor 5a
100535938	-1.1418	0.32469	-2.9648	0.014431	0.20911	-3.226	oit3	oncoprotein induced transcript 3
100136852	0.41964	3.8622	2.9647	0.014434	0.20911	-3.2261	zgc:174863	zgc:174863
777759	-0.33055	2.7088	-2.9638	0.014456	0.20926	-3.2276	sytl1	synaptotagmin-like 1
568809	-0.78487	1.8574	-2.963	0.014477	0.20938	-3.229	tmem82	transmembrane protein 82
100302470	0.7141	6.1002	2.9617	0.014507	0.20938	-3.2311	epdl1	ependymin-like 1
556229	-0.37854	5.9219	-2.9612	0.01452	0.20938	-3.232	aass	aminoadipate-semialdehyde synthase
795494	-0.3686	4.3101	-2.9612	0.01452	0.20938	-3.232	si:ch211-256m1.8	si:ch211-256m1.8
768299	0.56089	5.1468	2.9612	0.014522	0.20938	-3.2321	zgc:153665	zgc:153665
563080	-0.85	2.5778	-2.9601	0.014548	0.20959	-3.2339	opn4xb	opsin 4xb
100003661	-1.0625	0.80268	-2.9588	0.01458	0.20973	-3.236	si:ch1073-416d2.3	si:ch1073-416d2.3
369195	0.33193	5.1816	2.9587	0.014581	0.20973	-3.2361	tgfb3	"transforming growth factor, beta 3"
568387	-0.67127	1.6669	-2.956	0.01465	0.21043	-3.2407	spns3	spinster homolog 3 (Drosophila)
795729	-0.58936	2.4305	-2.9558	0.014653	0.21043	-3.2409	si:ch211-288g17.4	si:ch211-288g17.4
553274	-0.40527	3.202	-2.955	0.014674	0.21056	-3.2423	ccdc141	coiled-coil domain containing 141
100034395	-0.78863	0.92486	-2.9542	0.014693	0.21068	-3.2436	aqp10b	aquaporin 10b
567601	0.33128	3.3927	2.9536	0.014709	0.21074	-3.2447	shq1	"SHQ1, H/ACA ribonucleoprotein assembly factor"
100000754	-1.6094	-4.4899	-2.9528	0.014728	0.21076	-3.2459	ms4a17c.1	"membrane-spanning 4-domains, subfamily A, member 17C.1"
492647	0.5236	7.7505	2.9526	0.014734	0.21076	-3.2463	angptl4	angiopoietin-like 4
100534806	0.6044	2.1413	2.9501	0.014796	0.21147	-3.2504	si:dkey-106l3.7	si:dkey-106l3.7
100150820	-0.93982	-0.60803	-2.9496	0.014809	0.21147	-3.2513	fam216a	family with sequence similarity 216 member A
553606	-0.34536	3.9811	-2.9492	0.014819	0.21147	-3.252	nle1	notchless homolog 1 (Drosophila)
560546	0.54041	2.1523	2.9478	0.014855	0.21182	-3.2544	slc2a10	solute carrier family 2 member 10
724019	0.49829	2.7346	2.9457	0.014907	0.21238	-3.2578	crb3b	crumbs homolog 3b
568717	-0.46161	3.9407	-2.9438	0.014957	0.21281	-3.2611	lactbl1a	"lactamase, beta-like 1a"
563897	-1.0913	-0.93296	-2.9436	0.014961	0.21281	-3.2613	abo	"ABO blood group (transferase A, alpha 1-3-N-acetylgalactosaminyltransferase; transferase B, alpha 1-3-galactosyltransferase)"
794786	-1.8024	-2.2859	-2.9412	0.015021	0.2135	-3.2652	ifit14	interferon-induced protein with tetratricopeptide repeats 14
555478	-0.37932	4.863	-2.9391	0.015076	0.21409	-3.2689	si:ch211-106j24.1	si:ch211-106j24.1
100329788	0.50966	2.6289	2.9387	0.015086	0.21409	-3.2695	si:ch73-217n20.1	si:ch73-217n20.1
83775	0.43644	5.5072	2.9367	0.015137	0.21441	-3.2728	cry4	cryptochrome circadian regulator 4
394104	0.34384	6.9473	2.9365	0.015143	0.21441	-3.2732	ncoa4	nuclear receptor coactivator 4
566628	0.64202	-0.33475	2.9354	0.015169	0.21441	-3.2749	si:ch211-27e6.1	si:ch211-27e6.1
323529	-0.25305	7.7299	-2.935	0.01518	0.21441	-3.2756	hnrnpa0a	heterogeneous nuclear ribonucleoprotein A0a
565830	-0.28715	6.6782	-2.9349	0.015184	0.21441	-3.2759	mapk6	mitogen-activated protein kinase 6
431765	-0.51136	5.625	-2.9348	0.015186	0.21441	-3.276	nfil3-6	"nuclear factor, interleukin 3 regulated, member 6"
30449	0.33	3.9375	2.9346	0.015192	0.21441	-3.2763	serpinh1b	"serpin peptidase inhibitor, clade H (heat shock protein 47), member 1b"
100149596	-1.3111	-1.0692	-2.9329	0.015235	0.21469	-3.2792	si:ch211-149b19.4	si:ch211-149b19.4
566702	0.46344	9.2207	2.9329	0.015235	0.21469	-3.2792	and2	actinodin2
317638	0.54702	7.0916	2.9312	0.01528	0.21499	-3.282	igfbp1a	insulin-like growth factor binding protein 1a
767762	-1.686	-2.2054	-2.9311	0.01528	0.21499	-3.2821	zgc:152857	zgc:152857
564395	0.28103	4.5337	2.9302	0.015305	0.21516	-3.2836	smad6b	SMAD family member 6b
436702	0.52217	2.5517	2.9276	0.015374	0.21581	-3.288	wdr83	WD repeat domain containing 83
794894	3.0886	-3.4013	2.927	0.015389	0.21581	-3.289	si:dkey-222h21.2	si:dkey-222h21.2
100002060	-0.53972	2.219	-2.9266	0.015398	0.21581	-3.2896	masp1	mannan-binding lectin serine peptidase 1
101882029	-1.5241	-0.82522	-2.9264	0.015404	0.21581	-3.29	LOC101882029	uncharacterized LOC101882029
108183587	0.64897	2.0739	2.9259	0.015416	0.21581	-3.2907	LOC108183587	scavenger receptor cysteine-rich domain-containing group B protein-like
100008009	-1.2767	2.195	-2.9257	0.015423	0.21581	-3.2911	mbl2	mannose binding lectin 2
563589	-0.36122	4.9446	-2.9251	0.015437	0.21585	-3.2921	chkb	choline kinase beta
554138	0.52581	2.581	2.9232	0.015487	0.21632	-3.2953	rpap2	RNA polymerase II associated protein 2
550328	0.44962	1.9656	2.9227	0.015501	0.21632	-3.2961	prkn	parkin RBR E3 ubiquitin protein ligase
493631	-1.5078	-1.9801	-2.9224	0.015507	0.21632	-3.2965	crygm3	"crystallin, gamma M3"
100144555	1.0959	-0.50934	2.9209	0.015548	0.21672	-3.2991	btr22	"bloodthirsty-related gene family, member 22"
492334	-0.87658	1.7718	-2.9202	0.015566	0.2168	-3.3002	slc5a11	solute carrier family 5 member 11
100003911	1.2461	-0.19962	2.9192	0.015593	0.21702	-3.3019	cxcl19	chemokine (C-X-C motif) ligand 19
555790	0.6232	3.6279	2.9158	0.015683	0.2181	-3.3076	si:dkey-9i23.15	si:dkey-9i23.15
100002917	0.98899	3.4039	2.9149	0.015706	0.21825	-3.309	abcc6b.2	"ATP-binding cassette, sub-family C (CFTR/MRP), member 6b, tandem duplicate 2"
266990	-0.42449	5.1044	-2.9137	0.01574	0.21842	-3.3111	pwp2h	PWP2 small subunit processome component
108191768	1.1298	-1.1761	2.9132	0.015752	0.21842	-3.3119	hmx3b	H6 family homeobox 3b
100034504	2.4593	-4.0625	2.9129	0.01576	0.21842	-3.3124	si:dkeyp-122a9.2	si:dkeyp-122a9.2
797187	-0.43603	5.2113	-2.9127	0.015767	0.21842	-3.3128	iqsec2b	IQ motif and Sec7 domain ArfGEF 2b
565958	2.8629	-3.7531	2.9114	0.0158	0.21872	-3.3149	ccr7	chemokine (C-C motif) receptor 7
541497	-0.3954	4.1549	-2.909	0.015867	0.21934	-3.319	slc47a1	solute carrier family 47 member 1
101886221	-0.4654	2.8322	-2.9088	0.01587	0.21934	-3.3192	si:cabz01054394.5	si:cabz01054394.5
555902	-0.80977	1.3424	-2.9052	0.015969	0.2204	-3.3253	si:ch211-117n7.6	si:ch211-117n7.6
30311	0.48844	3.4651	2.9049	0.015977	0.2204	-3.3258	ek1	eph-like kinase 1
100189608	2.1854	-2.8669	2.9047	0.015983	0.2204	-3.3261	thpo	thrombopoietin
553565	-0.30871	5.0783	-2.9037	0.01601	0.22061	-3.3278	wbp2	WW domain binding protein 2
559516	0.49036	3.59	2.9026	0.016038	0.22082	-3.3295	col7a1l	collagen type VII alpha 1-like
557858	0.3316	4.5103	2.9005	0.016097	0.22138	-3.3331	dnajc10	"DnaJ (Hsp40) homolog, subfamily C, member 10"
393315	-0.43454	4.022	-2.9002	0.016104	0.22138	-3.3335	kyat3	kynurenine aminotransferase 3
394000	0.43107	7.4023	2.8998	0.016116	0.22138	-3.3342	pgm1	phosphoglucomutase 1
564779	-1.2549	-0.67986	-2.8993	0.016128	0.22138	-3.335	eps8b	epidermal growth factor receptor pathway substrate 8b
100148835	-0.59845	4.2431	-2.8982	0.016158	0.2216	-3.3368	dgkzb	"diacylglycerol kinase, zeta b"
336478	0.67438	2.0642	2.8977	0.016172	0.2216	-3.3377	si:dkey-92i15.4	si:dkey-92i15.4
566499	0.39944	5.7853	2.8974	0.01618	0.2216	-3.3382	slc16a10	solute carrier family 16 member 10
503708	0.75441	1.5383	2.8966	0.016205	0.22168	-3.3396	503708	NA
404039	0.61609	4.6337	2.8963	0.016211	0.22168	-3.34	npsn	nephrosin
103909541	-0.94154	-0.646	-2.8949	0.01625	0.22204	-3.3424	LOC103909541	natural killer cell receptor 2B4-like
566084	0.46155	1.9949	2.8922	0.016326	0.22273	-3.3469	si:ch211-91p5.3	si:ch211-91p5.3
794575	-1.4192	-0.5388	-2.8919	0.016333	0.22273	-3.3474	agtr1a	"angiotensin II receptor, type 1a"
560860	-0.55024	4.5316	-2.8917	0.016339	0.22273	-3.3477	wfdc1	WAP four-disulfide core domain 1
403008	0.31169	3.642	2.891	0.016358	0.22273	-3.3489	phc1	polyhomeotic homolog 1
799384	-3.1882	-1.9863	-2.8907	0.016368	0.22273	-3.3494	si:dkey-250k15.4	si:dkey-250k15.4
335494	0.56169	5.7385	2.8904	0.016374	0.22273	-3.3498	fuca1.1	"alpha-L-fucosidase 1, tandem duplicate 1"
108179106	1.0508	0.61282	2.8898	0.016391	0.22279	-3.3508	LOC108179106	"sushi, nidogen and EGF-like domain-containing protein 1"
494043	0.36184	3.8377	2.8885	0.016428	0.22303	-3.353	slc9a8	solute carrier family 9 member 8
407723	0.42238	3.7928	2.8883	0.016433	0.22303	-3.3534	smcr8b	"Smith-Magenis syndrome chromosome region, candidate 8b"
100150882	1.6268	1.7116	2.8878	0.016448	0.22306	-3.3542	LOC100150882	uncharacterized LOC100150882
794053	-1.6589	-1.8849	-2.886	0.016498	0.22328	-3.3572	il13	interleukin 13
793303	0.49706	3.4064	2.886	0.016498	0.22328	-3.3572	cited1	"Cbp/p300-interacting transactivator, with Glu/Asp-rich carboxy-terminal domain, 1"
321552	0.5247	9.4274	2.8859	0.016502	0.22328	-3.3574	smyhc1	slow myosin heavy chain 1
322338	0.32337	6.3434	2.8849	0.016528	0.22331	-3.359	exoc1	exocyst complex component 1
565145	0.4865	5.2308	2.8849	0.016529	0.22331	-3.359	adamts1	"ADAM metallopeptidase with thrombospondin type 1 motif, 1"
568219	-0.51611	2.73	-2.8793	0.016686	0.22527	-3.3683	si:ch73-139e5.4	si:ch73-139e5.4
387527	-0.41123	4.2962	-2.877	0.016753	0.22591	-3.3722	cyp4t8	"cytochrome P450, family 4, subfamily T, polypeptide 8"
100537793	-0.34627	4.4693	-2.8768	0.016759	0.22591	-3.3726	pcare1	photoreceptor cilium actin regulator 1
497384	-0.29517	5.9272	-2.8762	0.016775	0.22596	-3.3735	prkcaa	"protein kinase C, alpha, a"
100006302	1.1889	-0.83398	2.8747	0.016817	0.22603	-3.3759	si:dkeyp-75h12.7	si:dkeyp-75h12.7
559752	0.5055	5.645	2.8746	0.01682	0.22603	-3.3761	slc22a18	solute carrier family 22 member 18
556808	-0.39863	2.3353	-2.8742	0.016832	0.22603	-3.3768	asb13b	ankyrin repeat and SOCS box containing 13b
567653	-0.44868	1.2795	-2.8734	0.016856	0.22603	-3.3782	si:ch211-155m12.1	si:ch211-155m12.1
100150283	0.4263	1.5157	2.8733	0.016857	0.22603	-3.3783	loxhd1b	lipoxygenase homology domains 1b
566821	-0.30627	5.173	-2.8716	0.016906	0.22603	-3.3811	ablim3	"actin binding LIM protein family, member 3"
406477	0.26891	4.9196	2.8715	0.016909	0.22603	-3.3813	galnt6	UDP-N-acetyl-alpha-D-galactosamine:polypeptide N-acetylgalactosaminyltransferase 6 (GalNAc-T6)
30541	0.30676	3.3403	2.8711	0.01692	0.22603	-3.3819	foxa1	forkhead box A1
394025	0.46008	2.3625	2.8707	0.016934	0.22603	-3.3827	nek2	NIMA-related kinase 2
557447	0.50427	0.19333	2.8706	0.016935	0.22603	-3.3828	fzd9a	frizzled class receptor 9a
559575	-0.29933	4.1701	-2.8705	0.016938	0.22603	-3.383	si:ch211-15d5.11	si:ch211-15d5.11
100101465	-1.7193	-0.98346	-2.8704	0.016942	0.22603	-3.3832	cd247l	CD247 antigen like
100321723	-0.60158	2.1961	-2.8702	0.016946	0.22603	-3.3834	si:dkey-192g7.3	si:dkey-192g7.3
407989	0.27555	8.2419	2.8694	0.01697	0.22603	-3.3848	adss1	adenylosuccinate synthase 1
100147955	0.34898	1.7979	2.8693	0.016973	0.22603	-3.385	si:dkey-77f5.4	si:dkey-77f5.4
556523	0.29171	4.997	2.869	0.016981	0.22603	-3.3854	sh3rf1	SH3 domain containing ring finger 1
170446	0.30595	7.2082	2.8685	0.016996	0.22606	-3.3863	meis1b	Meis homeobox 1 b
407677	-0.26538	5.5919	-2.8667	0.017048	0.22659	-3.3893	lrrfip1a	leucine rich repeat (in FLII) interacting protein 1a
100149942	0.27753	3.7111	2.8661	0.017066	0.22666	-3.3903	taf4a	"TAF4A RNA polymerase II, TATA box binding protein (TBP)-associated factor"
445146	0.37342	5.1984	2.8639	0.01713	0.22728	-3.394	otud5b	OTU deubiquitinase 5b
751631	-0.48355	2.0557	-2.8636	0.017138	0.22728	-3.3944	rnf182	ring finger protein 182
140424	-0.39345	3.4174	-2.8606	0.017225	0.22827	-3.3994	gucy2f	"guanylate cyclase 2F, retinal"
394164	0.27779	5.779	2.8594	0.017262	0.22848	-3.4015	edem1	"ER degradation enhancer, mannosidase alpha-like 1"
324212	0.50837	3.2135	2.8592	0.017266	0.22848	-3.4017	cyp2aa6	"cytochrome P450, family 2, subfamily AA, polypeptide 6"
406703	0.69721	8.7256	2.8558	0.017368	0.22965	-3.4075	gsta.1	"glutathione S-transferase, alpha tandem duplicate 1"
566018	-0.31975	3.5174	-2.8549	0.017395	0.22974	-3.409	recql	RecQ helicase-like
101884436	-0.52779	0.68909	-2.8547	0.0174	0.22974	-3.4093	si:ch73-139j3.4	si:ch73-139j3.4
100149526	0.4474	2.3522	2.852	0.017479	0.23061	-3.4137	sall1b	spalt-like transcription factor 1b
556292	0.39217	2.0892	2.8515	0.017494	0.23065	-3.4146	zgc:171901	zgc:171901
101886968	-1.3254	-0.053912	-2.851	0.01751	0.23069	-3.4154	cst14b.2	"cystatin 14b, tandem duplicate 2"
101886366	-0.8831	2.1779	-2.8477	0.017607	0.23179	-3.4208	LOC101886366	fibronectin type III domain-containing protein 7-like
565629	-1.2199	-0.28388	-2.8441	0.017717	0.23304	-3.4269	kcnk10b	"potassium channel, subfamily K, member 10b"
386613	-0.41245	4.0859	-2.8437	0.017727	0.23304	-3.4275	pdca	phosducin a
100006782	-0.74948	3.277	-2.8384	0.017889	0.23495	-3.4364	si:dkey-105h12.2	si:dkey-105h12.2
571305	0.38126	2.7539	2.8381	0.017899	0.23495	-3.4369	gnav1	guanine nucleotide binding protein (G protein) alpha v1
100148867	0.65031	2.5816	2.8366	0.017944	0.2351	-3.4394	lrrc32	leucine rich repeat containing 32
100149633	-0.55896	1.4643	-2.8365	0.017945	0.2351	-3.4394	mkrn2os.1	"MKRN2 opposite strand, tandem duplicate 1"
557716	-0.67243	0.39746	-2.8364	0.017951	0.2351	-3.4397	nags	N-acetylglutamate synthase
393787	0.50339	4.9124	2.836	0.017962	0.2351	-3.4404	pcbd1	pterin-4 alpha-carbinolamine dehydratase/dimerization cofactor of hepatocyte nuclear factor 1 alpha
768134	-0.60239	4.4722	-2.8275	0.018223	0.23833	-3.4544	si:dkey-184p18.2	si:dkey-184p18.2
798646	-0.86122	0.50791	-2.827	0.018239	0.23837	-3.4553	si:ch211-149k23.9	si:ch211-149k23.9
393492	0.62401	3.9856	2.8245	0.018315	0.23899	-3.4594	lbh	LBH regulator of WNT signaling pathway
100334492	0.35156	5.0712	2.8242	0.018327	0.23899	-3.46	entpd5b	ectonucleoside triphosphate diphosphohydrolase 5b
797096	-0.41135	2.234	-2.8239	0.018335	0.23899	-3.4605	si:ch211-22d5.2	si:ch211-22d5.2
791105	-1.948	-1.954	-2.8238	0.018339	0.23899	-3.4606	ghrh	growth hormone releasing hormone
103909724	-0.75026	0.66078	-2.8222	0.018388	0.23946	-3.4633	LOC103909724	T-lymphocyte surface antigen Ly-9-like
568392	-0.49946	8.151	-2.8202	0.018452	0.24003	-3.4666	LOC568392	cadherin-1-like
393853	-0.32516	5.147	-2.8196	0.018471	0.24003	-3.4676	slc30a1a	solute carrier family 30 member 1a
100002138	-2.1133	-4.1612	-2.8195	0.018474	0.24003	-3.4678	opn8a	"opsin 8, group member a"
561606	0.43663	4.4976	2.8189	0.01849	0.24003	-3.4687	atoh8	atonal bHLH transcription factor 8
105665605	-1.0331	-1.4491	-2.8184	0.018508	0.24003	-3.4696	pigrl4.2	polymeric immunoglobulin receptor-like 4.2
101884775	-1.6326	-1.6125	-2.8177	0.01853	0.24003	-3.4707	LOC101884775	Schwann cell myelin protein-like
794225	1.2171	-1.0141	2.8174	0.018539	0.24003	-3.4712	cfap157	cilia and flagella associated protein 157
445049	-0.78249	4.3922	-2.8174	0.018539	0.24003	-3.4712	zgc:92137	zgc:92137
403128	-2.064	-2.5983	-2.8169	0.018555	0.24007	-3.4721	tlr9	toll-like receptor 9
799648	-0.64732	4.5902	-2.8151	0.01861	0.24061	-3.475	muc13b	"mucin 13b, cell surface associated"
793907	0.70351	4.992	2.8145	0.01863	0.24069	-3.476	igfbp1b	insulin-like growth factor binding protein 1b
100006895	-1.104	4.0626	-2.8131	0.018674	0.24107	-3.4783	LOC100006895	alpha-2-macroglobulin-like
449670	0.48188	7.7145	2.8127	0.018687	0.24107	-3.479	srl	sarcalumenin
100334703	0.44428	4.4643	2.8123	0.018699	0.24107	-3.4797	ston1	stonin 1
100333020	-0.74224	-0.68788	-2.8119	0.018713	0.24108	-3.4804	slc23a3	solute carrier family 23 member 3
30671	0.68923	4.4583	2.8109	0.018746	0.24124	-3.4821	hsp70.3	"heat shock cognate 70-kd protein, tandem duplicate 3"
100136865	-0.47614	6.0193	-2.8107	0.018752	0.24124	-3.4824	abcb4	"ATP-binding cassette, sub-family B (MDR/TAP), member 4"
567243	-0.99216	2.3819	-2.8102	0.018767	0.24125	-3.4832	camkva	CaM kinase-like vesicle-associated a
336944	-0.9319	-2.3409	-2.8096	0.018787	0.24134	-3.4842	ccr6b	chemokine (C-C motif) receptor 6b
100321715	-0.49912	4.4949	-2.8076	0.01885	0.24197	-3.4875	ccdc136b	coiled-coil domain containing 136b
792506	0.52868	3.1259	2.8067	0.018878	0.24216	-3.4889	ugt2b6	"UDP glucuronosyltransferase 2 family, polypeptide B6"
797793	0.6384	2.2806	2.8042	0.018959	0.24302	-3.4931	si:dkey-82o10.4	si:dkey-82o10.4
552940	0.47781	6.1131	2.8035	0.018983	0.24305	-3.4943	cavin4a	caveolae associated protein 4a
563138	-1.4783	-0.29336	-2.8034	0.018987	0.24305	-3.4946	si:ch211-219a15.4	si:ch211-219a15.4
393528	0.49573	4.754	2.7995	0.019111	0.2442	-3.5009	lias	lipoic acid synthetase
796867	-0.42293	8.5727	-2.7994	0.019115	0.2442	-3.5011	arr3b	"arrestin 3b, retinal (X-arrestin)"
404625	-0.54339	1.5206	-2.7993	0.019118	0.2442	-3.5013	cx52.9	connexin 52.9
449769	0.46744	6.4637	2.7981	0.019157	0.24424	-3.5032	glrx	glutaredoxin (thioltransferase)
550134	0.46466	8.7344	2.7981	0.019157	0.24424	-3.5032	ubb	ubiquitin B
566751	-0.6717	3.0445	-2.7975	0.019178	0.24424	-3.5043	si:ch211-131k2.3	si:ch211-131k2.3
108180718	-0.8328	2.5091	-2.7963	0.019215	0.24424	-3.5062	LOC108180718	syncollin-like
553273	0.436	4.5478	2.7962	0.01922	0.24424	-3.5064	ccn1l2	"cellular communication network factor 1, like 2"
566373	-0.54691	4.0717	-2.7962	0.019221	0.24424	-3.5065	ano2b	anoctamin 2b
260440	0.29767	12.477	2.7961	0.019222	0.24424	-3.5066	atp2a1	ATPase sarcoplasmic/endoplasmic reticulum Ca2+ transporting 1
100124608	-0.78068	2.2327	-2.7958	0.019233	0.24424	-3.5071	si:dkey-10o6.2	si:dkey-10o6.2
798788	-0.34784	4.2974	-2.7955	0.019243	0.24424	-3.5076	gpx3	glutathione peroxidase 3
436974	-0.58595	1.7186	-2.7943	0.019284	0.24455	-3.5097	tlcd5b	TLC domain containing 5b
60642	0.30272	5.1085	2.7939	0.019295	0.24455	-3.5102	sox9b	SRY-box transcription factor 9b
541445	0.4423	5.6332	2.793	0.019326	0.24477	-3.5118	ogna	"osteoglycin, paralog a"
557248	0.32943	5.4108	2.7921	0.019355	0.24496	-3.5133	zmp:0000001114	zmp:0000001114
571721	-0.48339	2.6416	-2.7904	0.01941	0.24549	-3.516	LOC571721	gastrula zinc finger protein XlCGF57.1
334098	-0.42392	5.5766	-2.7887	0.019466	0.2457	-3.5188	hsd11b2	hydroxysteroid (11-beta) dehydrogenase 2
541429	0.31277	7.2251	2.7883	0.019481	0.2457	-3.5196	aoc2	amine oxidase copper containing 2
100001260	0.40409	4.9293	2.7882	0.019484	0.2457	-3.5198	ppp1r3ab	"protein phosphatase 1, regulatory subunit 3Ab"
445818	-1.0471	1.5465	-2.7879	0.019495	0.2457	-3.5203	cthl	"cystathionase (cystathionine gamma-lyase), like"
101882922	-0.41078	0.55193	-2.7878	0.019496	0.2457	-3.5204	timp4.1	"TIMP metallopeptidase inhibitor 4, tandem duplicate 1"
564067	0.58363	3.5518	2.7875	0.019508	0.2457	-3.5209	abcb6a	"ATP-binding cassette, sub-family B (MDR/TAP), member 6a"
100150924	0.27909	3.4354	2.7869	0.019527	0.24576	-3.5219	polg	"polymerase (DNA directed), gamma"
553423	0.56935	3.479	2.7863	0.019546	0.24583	-3.5228	sumf1	sulfatase modifying factor 1
553467	-0.65933	1.4938	-2.7836	0.019635	0.24678	-3.5273	cideb	cell death inducing DFFA like effector b
100334116	1.0611	0.1041	2.7788	0.019799	0.24867	-3.5354	LOC100334116	hepatocyte growth factor-like
492353	-0.39693	3.7268	-2.7765	0.019876	0.24946	-3.5392	ddx11	DEAD/H (Asp-Glu-Ala-Asp/His) box helicase 11
101885363	-0.43804	2.3431	-2.7758	0.0199	0.24948	-3.5403	LOC101885363	gastrula zinc finger protein XlCGF8.2DB-like
798281	1.3465	0.58228	2.7752	0.019918	0.24948	-3.5412	cdx4	caudal type homeobox 4
30585	0.39957	4.74	2.7749	0.019931	0.24948	-3.5419	dlx3b	distal-less homeobox 3b
321298	-0.40399	4.2103	-2.7744	0.019948	0.24948	-3.5427	col14a1a	"collagen, type XIV, alpha 1a"
559377	0.66566	0.52311	2.7741	0.019955	0.24948	-3.5431	bspry	B-box and SPRY domain containing
100005887	0.24938	4.5332	2.7737	0.01997	0.24948	-3.5438	vps18	VPS18 core subunit of CORVET and HOPS complexes
553987	1.1026	1.4705	2.7736	0.019975	0.24948	-3.544	pcdh1g3	protocadherin 1 gamma 3
393376	0.31177	8.6864	2.773	0.019994	0.24955	-3.5449	hif1al	"hypoxia inducible factor 1 subunit alpha, like"
492476	-0.5306	3.2077	-2.7705	0.020079	0.25044	-3.5491	csad	cysteine sulfinic acid decarboxylase
30511	0.35011	3.2677	2.7699	0.0201	0.25045	-3.5501	msx1b	muscle segment homeobox 1b
100536871	0.85879	-0.60485	2.7696	0.020111	0.25045	-3.5506	prlh	prolactin releasing hormone
436729	0.27665	5.0607	2.7693	0.020122	0.25045	-3.5511	setd7	"SET domain containing 7, histone lysine methyltransferase"
58085	-0.29242	7.1487	-2.7688	0.020139	0.25049	-3.552	prph2a	"peripherin 2a (retinal degeneration, slow)"
563983	1.0824	-0.37363	2.7677	0.020175	0.25077	-3.5537	usp43a	ubiquitin specific peptidase 43a
767629	1.031	1.9359	2.7664	0.020219	0.25105	-3.5558	gtf2a1l	"general transcription factor IIA, 1-like"
393939	0.64844	5.2694	2.7661	0.020232	0.25105	-3.5565	atf3	activating transcription factor 3
569452	-2.6648	-3.3454	-2.7655	0.020252	0.25105	-3.5574	pimr188	"Pim proto-oncogene, serine/threonine kinase, related 188"
30337	0.68826	0.32791	2.7654	0.020253	0.25105	-3.5575	hoxb1a	homeobox B1a
407664	0.50333	2.9962	2.7642	0.020295	0.2514	-3.5595	hbegfb	heparin-binding EGF-like growth factor b
563826	-0.55778	4.2713	-2.7636	0.020317	0.2515	-3.5606	rhcgl1	"Rh family, C glycoprotein, like 1"
100000884	-0.52044	2.0773	-2.7628	0.020346	0.2516	-3.5619	xkr5b	XK related 5b
798358	0.94665	-0.75496	2.7625	0.020354	0.2516	-3.5623	ms4a17a.3	"membrane-spanning 4-domains, subfamily A, member 17A.3"
565911	0.39372	5.3563	2.7612	0.020401	0.25202	-3.5646	mylipb	myosin regulatory light chain interacting protein b
101883254	-0.5538	2.4667	-2.7599	0.020444	0.25221	-3.5666	si:ch1073-266p11.2	si:ch1073-266p11.2
100009656	0.37282	4.944	2.7599	0.020445	0.25221	-3.5667	pcsk7	proprotein convertase subtilisin/kexin type 7
503757	-0.64606	2.8641	-2.7561	0.020577	0.2536	-3.5729	zgc:110789	zgc:110789
560275	0.42442	4.2369	2.7558	0.020588	0.2536	-3.5734	nuak2	"NUAK family, SNF1-like kinase, 2"
791647	-0.43835	7.444	-2.7555	0.0206	0.2536	-3.574	pnp5a	purine nucleoside phosphorylase 5a
100332580	-0.99557	0.070389	-2.7547	0.020626	0.25375	-3.5753	pdzd7a	PDZ domain containing 7a
558923	-0.50113	1.8996	-2.7543	0.020643	0.25377	-3.576	palb2	partner and localizer of BRCA2
556241	-0.84431	0.47195	-2.7539	0.020656	0.25377	-3.5767	si:dkey-85k7.12	si:dkey-85k7.12
567369	0.33693	4.4564	2.7532	0.02068	0.2539	-3.5778	afap1l2	actin filament associated protein 1-like 2
322508	0.49415	8.6437	2.7518	0.020728	0.25422	-3.58	h1-10	H1.10 linker histone
325922	-0.31997	5.1447	-2.7516	0.020735	0.25422	-3.5804	retsat	"retinol saturase (all-trans-retinol 13,14-reductase)"
563802	-1.0402	1.2996	-2.7488	0.020835	0.25527	-3.585	kcnh2a	"potassium voltage-gated channel, subfamily H (eag-related), member 2a"
492493	0.4754	5.3112	2.7465	0.020918	0.25612	-3.5889	tnni2a.1	"troponin I type 2a (skeletal, fast), tandem duplicate 1"
436665	-2.7357	-3.2451	-2.7444	0.020991	0.25668	-3.5923	krt95	kertain 95
107990272	0.91206	-0.56741	2.7444	0.020993	0.25668	-3.5924	si:dkey-58f6.2	si:dkey-58f6.2
565522	0.31267	8.3614	2.7436	0.021021	0.25677	-3.5937	pnrc2	proline-rich nuclear receptor coactivator 2
558139	0.40428	2.7272	2.7432	0.021034	0.25677	-3.5943	sele	selectin E
393422	-0.52799	4.3029	-2.743	0.021042	0.25677	-3.5947	camkvb	CaM kinase-like vesicle-associated b
100003209	0.37137	5.1966	2.7418	0.021087	0.25699	-3.5968	ifitm1	interferon induced transmembrane protein 1
100004976	1.5235	-4.4899	2.7417	0.021089	0.25699	-3.5969	si:dkey-58f10.10	si:dkey-58f10.10
405850	-0.34001	6.7066	-2.7411	0.021109	0.25706	-3.5978	foxg1b	forkhead box G1b
30300	0.63697	2.509	2.7402	0.021142	0.25729	-3.5993	her2	hairy-related 2
327154	-0.65205	3.9995	-2.7383	0.021212	0.25785	-3.6025	tent5c	terminal nucleotidyltransferase 5C
101885561	-0.99445	3.0769	-2.738	0.021221	0.25785	-3.6029	rp1l1b	rp1 like 1b
777719	-0.25233	5.8297	-2.7378	0.021231	0.25785	-3.6034	papss2a	3'-phosphoadenosine 5'-phosphosulfate synthase 2a
568270	-0.74752	2.5973	-2.7372	0.02125	0.2579	-3.6043	ankrd33ba	ankyrin repeat domain 33ba
436795	-0.37547	3.6377	-2.7368	0.021266	0.25793	-3.605	hgh1	HGH1 homolog (S. cerevisiae)
556984	-0.33484	5.8267	-2.7343	0.021357	0.25878	-3.6091	tnmd	tenomodulin
393347	0.31371	5.4955	2.7339	0.021371	0.25878	-3.6098	fgfrl1a	fibroblast growth factor receptor like 1a
792708	2.432	-3.5966	2.7337	0.02138	0.25878	-3.6102	chrm1a	"cholinergic receptor, muscarinic 1a"
555483	-0.83506	1.1241	-2.7326	0.021418	0.25907	-3.6119	ptgdsa	prostaglandin D2 synthase a
405833	-0.40505	4.9058	-2.7315	0.02146	0.25924	-3.6138	clic5b	chloride intracellular channel 5b
504040	-0.42542	1.3589	-2.7314	0.02146	0.25924	-3.6138	ak7b	adenylate kinase 7b
101883495	1.9573	-1.5488	2.7304	0.021497	0.25945	-3.6155	si:dkey-219e21.4	si:dkey-219e21.4
798684	1.9142	-1.8605	2.7302	0.021507	0.25945	-3.616	zgc:194101	zgc:194101
100536757	-0.56175	2.5929	-2.7296	0.021527	0.25947	-3.6169	LOC100536757	very low-density lipoprotein receptor-like
570158	0.32766	4.4671	2.7292	0.021544	0.25947	-3.6176	alkbh5	"alkB homolog 5, RNA demethylase"
323052	-0.26377	4.2916	-2.7286	0.021566	0.25947	-3.6186	zgc:165515	zgc:165515
795664	-0.56678	6.1603	-2.7286	0.021567	0.25947	-3.6186	795664	NA
566559	0.37159	6.873	2.7279	0.021589	0.25958	-3.6197	akt1s1	AKT1 substrate 1 (proline-rich)
555357	-2.2029	-3.8216	-2.7259	0.021665	0.26032	-3.6231	si:ch211-197g15.10	si:ch211-197g15.10
394160	-0.71663	1.0668	-2.7254	0.021681	0.26034	-3.6238	bokb	BCL2 family apoptosis regulator BOK b
360208	0.56999	6.6059	2.725	0.021698	0.26036	-3.6245	pvalb8	parvalbumin 8
559822	0.43752	4.5445	2.7224	0.021795	0.26136	-3.6289	zgc:162184	zgc:162184
406614	0.45884	6.8788	2.7211	0.021841	0.26173	-3.6309	irf2bp2b	interferon regulatory factor 2 binding protein 2b
560787	0.39478	6.0069	2.7205	0.021863	0.26182	-3.6319	klf11a	Kruppel-like factor 11a
407686	0.3381	5.0256	2.7201	0.02188	0.26185	-3.6327	zgc:113944	zgc:113944
449848	0.29872	4.6769	2.7193	0.021909	0.26203	-3.634	xrcc5	X-ray repair complementing defective repair in Chinese hamster cells 5
553579	-1.1502	1.6435	-2.7186	0.021933	0.26214	-3.635	fabp4b	fatty acid binding protein 4b
767715	-0.84027	0.79744	-2.7174	0.021979	0.26251	-3.6371	srd5a1	"steroid-5-alpha-reductase, alpha polypeptide 1 (3-oxo-5 alpha-steroid delta 4-dehydrogenase alpha 1)"
556860	-2.1015	-3.7065	-2.7167	0.022007	0.26254	-3.6383	si:dkey-21e2.10	si:dkey-21e2.10
432389	0.26563	4.3285	2.7166	0.022011	0.26254	-3.6385	ift172	intraflagellar transport 172
324152	0.25901	7.313	2.715	0.02207	0.26308	-3.6411	tax1bp1b	Tax1 (human T-cell leukemia virus type I) binding protein 1b
795261	-1.0653	-0.12886	-2.7143	0.022096	0.2632	-3.6422	ugt1b7	"UDP glucuronosyltransferase 1 family, polypeptide B7"
327453	-0.52074	2.9668	-2.7131	0.022141	0.2635	-3.6442	pfkfb1	"6-phosphofructo-2-kinase/fructose-2,6-biphosphatase 1"
777750	0.37505	4.5544	2.7129	0.022149	0.2635	-3.6446	ece1	endothelin converting enzyme 1
100174951	0.60302	7.4193	2.7102	0.02225	0.26452	-3.649	mt2	metallothionein 2
445149	0.29556	4.6451	2.7096	0.022275	0.26462	-3.65	zgc:100829	zgc:100829
324913	0.27347	6.4119	2.7092	0.022287	0.26462	-3.6506	znf503	zinc finger protein 503
393129	0.84281	0.99625	2.7089	0.022302	0.26462	-3.6512	zbtb2a	zinc finger and BTB domain containing 2a
337795	0.30593	3.1469	2.708	0.022336	0.26484	-3.6527	dact2	dishevelled-binding antagonist of beta-catenin 2
100148952	0.41649	0.36529	2.7073	0.022363	0.26499	-3.6539	si:ch211-57n23.1	si:ch211-57n23.1
101885420	-0.73328	1.1837	-2.7065	0.022393	0.26512	-3.6552	e2f1	E2F transcription factor 1
100001393	-0.41335	0.78751	-2.7062	0.022403	0.26512	-3.6556	zmp:0000001161	zmp:0000001161
678515	-0.45776	1.8948	-2.7055	0.022429	0.26517	-3.6567	upk1a	uroplakin 1a
393351	0.50302	6.2312	2.7053	0.022439	0.26517	-3.6572	chmp5b	charged multivesicular body protein 5b
571426	-0.39208	2.5504	-2.7046	0.022463	0.26517	-3.6582	fkrp	fukutin related protein
100004265	-0.371	5.0702	-2.7045	0.022469	0.26517	-3.6585	gpsm1a	G protein signaling modulator 1a
101882206	2.1599	-2.8933	2.7042	0.022481	0.26517	-3.659	LOC101882206	myeloid-associated differentiation marker-like protein 2
393719	-0.38594	5.6664	-2.7026	0.022542	0.26569	-3.6616	gnb5b	"guanine nucleotide binding protein (G protein), beta 5b"
557772	0.93067	-0.90537	2.7022	0.022555	0.26569	-3.6622	si:ch211-250g4.3	si:ch211-250g4.3
571582	0.79738	0.90118	2.7016	0.022579	0.2658	-3.6632	LOC571582	GTPase IMAP family member 4-like
108181672	-0.49468	1.6139	-2.7011	0.022599	0.26587	-3.6641	LOC108181672	major histocompatibility complex class I-related gene protein-like
406730	-0.24078	6.1893	-2.6997	0.022653	0.26633	-3.6664	apex1	APEX nuclease (multifunctional DNA repair enzyme) 1
569505	1.193	-0.27365	2.6976	0.022736	0.26675	-3.6699	si:ch211-191a16.5	si:ch211-191a16.5
100329613	-0.97693	0.43466	-2.6975	0.022737	0.26675	-3.67	hcar1-4	hydroxycarboxylic acid receptor 1-4
100333796	1.7826	-2.3015	2.6972	0.022749	0.26675	-3.6705	si:ch211-256e16.4	si:ch211-256e16.4
30647	0.4484	3.1877	2.6968	0.022763	0.26675	-3.6711	psme2	proteasome activator subunit 2
445094	0.45991	8.77	2.6968	0.022764	0.26675	-3.6711	pkmb	pyruvate kinase M1/2b
30146	1.5971	-1.7219	2.6956	0.022811	0.26714	-3.6732	lft2	lefty2
798316	-0.56856	0.2387	-2.695	0.022835	0.26724	-3.6742	LOC798316	amine sulfotransferase-like
100301982	-0.4658	4.6492	-2.6939	0.022876	0.26755	-3.6759	dpp4	dipeptidyl-peptidase 4
393589	0.43476	2.0484	2.6934	0.022897	0.26763	-3.6768	rars2	"arginyl-tRNA synthetase 2, mitochondrial"
641475	0.42115	4.4903	2.6911	0.022985	0.26836	-3.6805	clybl	citrate lyase beta like
569792	-0.37684	5.6418	-2.691	0.02299	0.26836	-3.6807	ly6pge	lymphocyte antigen 6 family member pge
447901	-0.51931	3.4089	-2.6899	0.023034	0.26859	-3.6826	polr3gla	polymerase (RNA) III (DNA directed) polypeptide G like a
560200	1.8062	-4.1019	2.6898	0.023039	0.26859	-3.6828	pimr132	"Pim proto-oncogene, serine/threonine kinase, related 132"
553663	-1.4872	-1.56	-2.6885	0.023088	0.26894	-3.6849	zgc:111976	zgc:111976
559212	-0.58384	3.3214	-2.6882	0.0231	0.26894	-3.6853	gbe1b	"glucan (1,4-alpha-), branching enzyme 1b"
327198	-0.48208	2.4105	-2.6871	0.023143	0.26916	-3.6872	micall2a	mical-like 2a
562947	-0.48937	3.3398	-2.6868	0.023155	0.26916	-3.6877	ano8a	anoctamin 8a
565795	0.47967	3.5602	2.6866	0.023163	0.26916	-3.688	nab1a	NGFI-A binding protein 1a (EGR1 binding protein 1)
566022	-0.37863	2.4997	-2.6848	0.023235	0.26983	-3.691	fdxacb1	ferredoxin-fold anticodon binding domain containing 1
30199	-0.68383	5.881	-2.6843	0.023253	0.26986	-3.6918	epd	ependymin
100001643	0.66981	5.4302	2.6822	0.023337	0.27065	-3.6953	si:ch73-7i4.2	si:ch73-7i4.2
100150236	3.0053	-1.8866	2.6817	0.02336	0.27075	-3.6962	LOC100150236	uncharacterized LOC100150236
793341	0.49704	3.9124	2.6798	0.023433	0.27142	-3.6992	slc12a9	solute carrier family 12 member 9
492759	-0.61938	3.9899	-2.6792	0.023459	0.27155	-3.7003	cyp3c3	"cytochrome P450, family 3, subfamily c, polypeptide 3"
497505	0.6295	4.7234	2.6775	0.023528	0.27217	-3.7032	acana	aggrecan a
100151764	-0.78411	2.3012	-2.6769	0.023549	0.27219	-3.704	btr06	"bloodthirsty-related gene family, member 6"
100150414	-0.33412	4.4302	-2.6763	0.023575	0.27219	-3.7051	si:dkey-85p17.3	si:dkey-85p17.3
81584	0.34291	7.2604	2.6756	0.023603	0.27219	-3.7063	cldne	claudin e
494176	0.53559	3.3549	2.6753	0.023614	0.27219	-3.7067	rdh12l	"retinol dehydrogenase 12, like"
570832	0.70017	4.257	2.6748	0.023634	0.27219	-3.7076	c7b	complement component 7b
321504	-0.24437	6.3195	-2.6747	0.023638	0.27219	-3.7077	ssb	small RNA binding exonuclease protection factor La
394190	0.32179	5.536	2.6745	0.023645	0.27219	-3.708	hmgcl	3-hydroxy-3-methylglutaryl-CoA lyase
553364	-0.7146	0.64636	-2.6738	0.023676	0.27219	-3.7093	iqca1	IQ motif containing with AAA domain 1
101885898	0.43438	5.3962	2.6738	0.023676	0.27219	-3.7093	prr18	proline rich 18
565282	0.95884	-0.082899	2.6737	0.023681	0.27219	-3.7095	si:ch211-163l21.10	si:ch211-163l21.10
402878	-0.28043	5.6827	-2.6731	0.023704	0.27221	-3.7104	mpp6a	"membrane protein, palmitoylated 6a (MAGUK p55 subfamily member 6)"
373884	0.30704	4.2645	2.6729	0.023713	0.27221	-3.7108	ada2a	adenosine deaminase 2a
114410	0.51896	7.1468	2.6711	0.023785	0.27271	-3.7137	casq2	calsequestrin 2
751684	-1.0284	-2.1996	-2.671	0.023786	0.27271	-3.7138	fbxo36b	F-box protein 36b
492778	-1.1436	0.33062	-2.6692	0.023862	0.2734	-3.7168	acot19	acyl-CoA thioesterase 19
557221	-0.36041	3.643	-2.6688	0.023878	0.27341	-3.7175	frem1b	Fras1 related extracellular matrix 1b
445390	-0.32405	3.9338	-2.6674	0.023934	0.27374	-3.7198	mybl2b	v-myb avian myeloblastosis viral oncogene homolog-like 2b
559679	-0.5126	1.4683	-2.6673	0.023937	0.27374	-3.7199	ptprja	protein tyrosine phosphatase receptor type Ja
405815	0.67464	-0.39398	2.6668	0.02396	0.27383	-3.7208	irf10	interferon regulatory factor 10
100142653	0.37992	2.0138	2.6663	0.023978	0.27386	-3.7215	si:ch73-142c19.1	si:ch73-142c19.1
100000492	-0.32395	4.173	-2.6648	0.024041	0.27426	-3.7241	mafaa	v-maf avian musculoaponeurotic fibrosarcoma oncogene homolog Aa
791449	0.61348	3.6314	2.6647	0.024043	0.27426	-3.7242	zgc:113363	zgc:113363
394182	0.32257	3.9358	2.6636	0.024091	0.27463	-3.7261	plekha3	"pleckstrin homology domain containing, family A (phosphoinositide binding specific) member 3"
406737	0.44408	6.3587	2.6628	0.024121	0.27479	-3.7273	cd9b	CD9 molecule b
793599	-0.40659	3.9142	-2.662	0.024157	0.27503	-3.7287	si:ch211-276i12.4	si:ch211-276i12.4
100001051	0.93564	1.2557	2.661	0.024196	0.27531	-3.7303	LOC100001051	glycine-rich cell wall structural protein-like
562087	-0.31706	5.4283	-2.6598	0.024247	0.27571	-3.7324	si:ch211-149b19.3	si:ch211-149b19.3
110437808	0.56125	0.67539	2.6591	0.024274	0.27585	-3.7335	LOC110437808	protein FAM26E-like
564844	-0.64637	2.277	-2.6578	0.024328	0.27614	-3.7356	mlsl	malate synthase-like
751753	0.25402	6.0351	2.6576	0.024337	0.27614	-3.7359	nucb1	nucleobindin 1
100535304	0.88542	1.0237	2.6574	0.024346	0.27614	-3.7363	epm2a	"EPM2A glucan phosphatase, laforin"
795785	-0.96508	2.0575	-2.6568	0.024371	0.27625	-3.7373	cxcl18b	chemokine (C-X-C motif) ligand 18b
560566	-0.36931	3.5537	-2.6544	0.024471	0.27721	-3.7413	gem	GTP binding protein overexpressed in skeletal muscle
556036	-0.36899	2.7704	-2.6536	0.024505	0.27728	-3.7426	zgc:154055	zgc:154055
550442	0.40452	7.3486	2.6535	0.024508	0.27728	-3.7427	coq10b	coenzyme Q10B
103911967	0.97836	1.2787	2.653	0.024527	0.27732	-3.7435	LOC103911967	L-seryl-tRNA(Sec) kinase-like
436897	0.43067	5.0622	2.6523	0.024558	0.27736	-3.7447	cldn11a	claudin 11a
393571	0.2791	4.5089	2.6521	0.024565	0.27736	-3.745	cxxc1a	CXXC finger protein 1a
563991	-0.3499	5.1555	-2.6519	0.024577	0.27736	-3.7455	sinhcaf	SIN3-HDAC complex associated factor
387533	-0.74107	1.8126	-2.6515	0.024592	0.27736	-3.746	gja3	"gap junction protein, alpha 3"
559990	0.43531	3.085	2.651	0.024611	0.2774	-3.7468	mlc1	modulator of VRAC current 1
436894	0.55107	3.324	2.6502	0.024648	0.27764	-3.7482	gsto1	glutathione S-transferase omega 1
30283	0.3697	5.681	2.6475	0.024758	0.27859	-3.7526	wnt11	"wingless-type MMTV integration site family, member 11"
566492	0.28665	4.2306	2.6474	0.024763	0.27859	-3.7528	wwc3	WWC family member 3
324381	0.45077	4.165	2.6467	0.024793	0.27876	-3.7539	fkbp10b	FKBP prolyl isomerase 10b
561967	0.62813	5.6473	2.6458	0.024832	0.27902	-3.7555	ces2b	carboxylesterase 2b
100534898	-0.30714	2.563	-2.6453	0.024851	0.27906	-3.7562	mtbp	MDM2 binding protein
550426	0.51966	3.0042	2.6442	0.024899	0.27923	-3.7581	zgc:112146	zgc:112146
103910581	0.44605	1.6823	2.644	0.024907	0.27923	-3.7584	LOC103910581	huntingtin-interacting protein 1-related protein
790919	0.34197	2.2534	2.6439	0.024913	0.27923	-3.7586	g6pc3	"glucose 6 phosphatase, catalytic, 3"
447905	-0.44119	2.0349	-2.6425	0.02497	0.27961	-3.7608	entpd2a.1	"ectonucleoside triphosphate diphosphohydrolase 2a, tandem duplicate 1"
561440	0.50259	2.379	2.6424	0.024977	0.27961	-3.7611	ntn4	netrin 4
793584	-0.65274	1.3129	-2.6401	0.025076	0.2802	-3.7649	gal3st1b	galactose-3-O-sulfotransferase 1b
678620	0.83437	1.3988	2.6398	0.025087	0.2802	-3.7654	zgc:136767	zgc:136767
100149104	0.30227	1.4532	2.6395	0.025097	0.2802	-3.7658	crispld1a	cysteine-rich secretory protein LCCL domain containing 1a
568436	0.74405	0.87106	2.6393	0.025109	0.2802	-3.7662	si:busm1-71b9.3	si:busm1-71b9.3
403009	-0.28296	6.1322	-2.6391	0.025115	0.2802	-3.7664	ezra	ezrin a
503747	0.42459	3.386	2.6389	0.025123	0.2802	-3.7668	fitm1	fat storage-inducing transmembrane protein 1
100000935	-0.3375	2.37	-2.6385	0.025144	0.28025	-3.7675	cpb2	carboxypeptidase B2 (plasma)
568155	0.88394	2.7907	2.6374	0.025187	0.28038	-3.7692	bnip4	BCL2 interacting protein 4
798613	2.2287	-3.0667	2.6374	0.025188	0.28038	-3.7692	ghrl	ghrelin/obestatin prepropeptide
108179170	-0.45544	0.91503	-2.6371	0.025202	0.28038	-3.7698	si:ch211-146l10.8	si:ch211-146l10.8
557317	-0.55892	1.9792	-2.6366	0.025222	0.28043	-3.7705	abcg5	"ATP-binding cassette, sub-family G (WHITE), member 5"
100148609	-0.61457	1.9295	-2.6347	0.025306	0.28119	-3.7738	si:dkey-26m3.3	si:dkey-26m3.3
450011	0.5756	5.6682	2.6334	0.025363	0.28157	-3.776	tspo	translocator protein
566640	-0.51046	2.3957	-2.6332	0.025372	0.28157	-3.7763	LOC566640	solute carrier family 22 member 6-like
550540	0.92796	0.15465	2.6317	0.025433	0.28208	-3.7786	henmt1	HEN methyltransferase 1
100150844	0.31905	6.9335	2.6293	0.025541	0.2831	-3.7827	prkcdb	"protein kinase C, delta b"
101884664	0.34781	3.5634	2.6286	0.025569	0.28324	-3.7838	si:ch1073-398f15.1	si:ch1073-398f15.1
406278	0.51255	5.6482	2.6277	0.025611	0.28353	-3.7854	ggctb	gamma-glutamylcyclotransferase b
406819	-1.6993	-0.56329	-2.626	0.025684	0.28383	-3.7881	chia.3	"chitinase, acidic.3"
664769	0.36728	3.6933	2.6258	0.025693	0.28383	-3.7884	slc35b3	solute carrier family 35 member B3
553515	0.39733	5.972	2.6256	0.025702	0.28383	-3.7888	cldn23a	claudin 23a
570552	-0.55765	2.8014	-2.6254	0.025711	0.28383	-3.7891	si:dkey-103j14.5	si:dkey-103j14.5
768193	-0.29329	3.2153	-2.6252	0.025717	0.28383	-3.7894	fam167aa	family with sequence similarity 167 member Aa
568355	0.81057	0.65219	2.6247	0.025742	0.28386	-3.7903	clec11a	C-type lectin domain containing 11A
140430	0.66184	0.85457	2.6244	0.025751	0.28386	-3.7906	guca1a	guanylate cyclase activator 1A
560912	-0.99819	3.355	-2.6233	0.025803	0.28424	-3.7926	si:dkey-92j12.5	si:dkey-92j12.5
100148802	0.46738	4.8337	2.6229	0.025817	0.28424	-3.7931	myoz3a	myozenin 3a
449936	0.2771	7.8699	2.6216	0.025875	0.28452	-3.7953	ppl	periplakin
103910469	1.3753	-0.69878	2.6213	0.025888	0.28452	-3.7958	103910469	NA
568634	-0.37198	3.0294	-2.6204	0.025928	0.28452	-3.7972	pglyrp2	peptidoglycan recognition protein 2
569807	0.7317	3.2044	2.6204	0.025931	0.28452	-3.7974	mia	MIA SH3 domain containing
393443	-0.37565	2.5495	-2.6191	0.025989	0.28452	-3.7995	xpa	"xeroderma pigmentosum, complementation group A"
566261	-0.71521	1.9087	-2.6191	0.025989	0.28452	-3.7995	c4	complement component 4
566639	0.33358	6.9464	2.6189	0.025997	0.28452	-3.7998	si:ch211-125o16.4	si:ch211-125o16.4
550568	0.44597	5.4176	2.6188	0.025999	0.28452	-3.7999	pdlim1	PDZ and LIM domain 1 (elfin)
30161	0.45564	2.5676	2.6186	0.026008	0.28452	-3.8002	chrd	chordin
102997060	-0.34749	5.5701	-2.6186	0.026009	0.28452	-3.8003	znf219	zinc finger protein 219
794264	-0.47349	2.8381	-2.6184	0.026016	0.28452	-3.8005	btr05	"bloodthirsty-related gene family, member 5"
678554	-0.6594	0.27045	-2.6178	0.026047	0.28465	-3.8017	bco2b	beta-carotene oxygenase 2b
503762	-0.24273	3.9272	-2.6175	0.026059	0.28465	-3.8021	fam210ab	family with sequence similarity 210 member Ab
497312	-0.29026	5.4953	-2.6171	0.026078	0.28468	-3.8028	cobl	cordon-bleu WH2 repeat protein
405806	-0.47021	2.9879	-2.6167	0.026094	0.28468	-3.8034	hoga1	4-hydroxy-2-oxoglutarate aldolase 1
100004554	0.97571	-0.18762	2.6153	0.026154	0.28471	-3.8057	si:ch211-260e23.7	si:ch211-260e23.7
192315	0.43679	4.9074	2.6153	0.026156	0.28471	-3.8057	uxs1	UDP-glucuronate decarboxylase 1
793321	-0.33237	4.8399	-2.6151	0.026163	0.28471	-3.806	fmn2a	formin 2a
436624	0.40749	3.6739	2.6151	0.026164	0.28471	-3.806	pdss2	"prenyl (decaprenyl) diphosphate synthase, subunit 2"
100003089	-2.2779	-2.8841	-2.6148	0.026176	0.28471	-3.8065	mmp21	matrix metallopeptidase 21
445296	0.34571	4.4907	2.6135	0.026236	0.28516	-3.8087	babam1	BRISC and BRCA1 A complex member 1
556013	-0.43226	4.7077	-2.6132	0.026249	0.28516	-3.8092	grik2	"glutamate receptor, ionotropic, kainate 2"
321618	0.42161	10.441	2.6125	0.026282	0.28535	-3.8104	h1-0	H1.0 linker histone
798565	0.32793	5.7784	2.6115	0.026327	0.28551	-3.812	ryr1a	ryanodine receptor 1a (skeletal)
100141350	-0.83239	2.5393	-2.6111	0.026342	0.28551	-3.8126	crp3	C-reactive protein 3
100318301	-0.29219	4.016	-2.6111	0.026344	0.28551	-3.8127	dhrsx	dehydrogenase/reductase (SDR family) X-linked
445280	0.42873	3.7119	2.6094	0.026422	0.28576	-3.8155	cd81b	CD81 molecule b
560687	-0.39442	4.1556	-2.6092	0.026428	0.28576	-3.8157	cmya5	cardiomyopathy associated 5
553587	-0.94283	7.3667	-2.6092	0.026429	0.28576	-3.8158	apoea	apolipoprotein Ea
100126122	0.77006	1.5788	2.609	0.026439	0.28576	-3.8161	zgc:173915	zgc:173915
335650	-0.3338	7.8918	-2.6088	0.026447	0.28576	-3.8164	rcvrn2	recoverin 2
564584	0.26817	4.6559	2.6083	0.026471	0.28585	-3.8173	nck1a	NCK adaptor protein 1a
561671	-0.31145	4.8728	-2.6067	0.026544	0.28634	-3.82	si:ch211-106h4.9	si:ch211-106h4.9
571446	-0.33598	3.5467	-2.6063	0.026558	0.28634	-3.8205	LOC571446	zinc transporter ZIP9-B-like
556491	-0.56361	1.1729	-2.6062	0.026564	0.28634	-3.8207	slc10a4	solute carrier family 10 member 4
100536063	-0.39913	3.1317	-2.6058	0.02658	0.28635	-3.8213	cobll1a	cordon-bleu WH2 repeat protein-like 1a
572044	-0.39693	5.5624	-2.6045	0.026643	0.28685	-3.8236	nocta	nocturnin a
393339	0.63298	2.714	2.6039	0.02667	0.28697	-3.8245	slc5a12	solute carrier family 5 member 12
561374	-0.50658	1.3932	-2.6025	0.026734	0.28744	-3.8269	kansl1l	KAT8 regulatory NSL complex subunit 1-like
450059	0.54281	3.4178	2.6022	0.026746	0.28744	-3.8273	osr1	odd-skipped related transcription factor 1
560581	0.27581	5.1385	2.6013	0.026788	0.28773	-3.8288	asap2b	"ArfGAP with SH3 domain, ankyrin repeat and PH domain 2b"
101883152	-0.41399	4.7028	-2.6009	0.026806	0.28774	-3.8294	si:ch211-121j5.4	si:ch211-121j5.4
368410	-0.44634	4.7086	-2.5982	0.026928	0.28888	-3.8338	pde6a	"phosphodiesterase 6A, cGMP-specific, rod, alpha"
560020	-0.89102	2.0015	-2.597	0.026986	0.28923	-3.8359	acss2l	acyl-CoA synthetase short chain family member 2 like
393348	-0.47843	4.1736	-2.5968	0.026992	0.28923	-3.8361	zgc:64106	zgc:64106
570350	-0.98645	-0.47601	-2.5956	0.02705	0.28967	-3.8382	si:ch73-109i22.2	si:ch73-109i22.2
565372	0.48187	1.6793	2.5952	0.027066	0.28967	-3.8388	hexdc	"hexosaminidase (glycosyl hydrolase family 20, catalytic domain) containing"
791135	-0.33844	2.5166	-2.5941	0.027116	0.28998	-3.8406	greb1	growth regulating estrogen receptor binding 1
558942	0.28903	5.5391	2.5931	0.027163	0.28998	-3.8422	colec12	collectin sub-family member 12
567480	-1.1776	-2.0084	-2.593	0.027167	0.28998	-3.8424	pnck	pregnancy up-regulated nonubiquitous CaM kinase
402824	0.3771	5.5024	2.593	0.027169	0.28998	-3.8424	cavin2a	caveolae associated protein 2a
503564	-0.88512	2.5971	-2.5928	0.027175	0.28998	-3.8427	drd4a	dopamine receptor D4a
556133	2.423	-1.9376	2.592	0.027214	0.29001	-3.844	zte38	zebrafish testis-expressed 38
566832	-0.41216	4.9542	-2.5917	0.027227	0.29001	-3.8445	dpp6b	dipeptidyl-peptidase 6b
560927	-1.3747	-1.2997	-2.5914	0.027241	0.29001	-3.845	c1r	"complement component 1, r subcomponent"
447942	-0.7157	1.4081	-2.5908	0.02727	0.29001	-3.846	cox6a2	cytochrome c oxidase subunit 6A2
368519	-0.47367	3.1195	-2.5907	0.027276	0.29001	-3.8462	stat4	signal transducer and activator of transcription 4
336567	0.33383	4.7124	2.5902	0.0273	0.29001	-3.8471	ftr67	"finTRIM family, member 67"
572610	0.97936	1.4119	2.5901	0.027304	0.29001	-3.8472	si:dkey-88n24.5	si:dkey-88n24.5
100149957	0.44308	1.1775	2.5898	0.027315	0.29001	-3.8476	xkr8.2	"XK, Kell blood group complex subunit-related family, member 8, tandem duplicate 2"
437021	0.47444	5.6649	2.5895	0.027332	0.29001	-3.8482	tspan36	tetraspanin 36
100000319	-0.58475	2.1853	-2.5891	0.027351	0.29001	-3.8489	pbld	phenazine biosynthesis like protein domain containing
799002	-0.73143	-0.2578	-2.589	0.027354	0.29001	-3.849	fgfbp1a	fibroblast growth factor binding protein 1a
436615	0.31715	3.6109	2.5882	0.027393	0.29024	-3.8504	gbp1	guanylate binding protein 1
795319	-0.5026	2.374	-2.5875	0.027423	0.29029	-3.8514	klhl40b	kelch-like family member 40b
566173	-0.42168	1.3711	-2.5871	0.027444	0.29029	-3.8522	si:ch211-76l23.7	si:ch211-76l23.7
368390	-0.34465	3.2803	-2.5868	0.027458	0.29029	-3.8527	plk4	polo-like kinase 4 (Drosophila)
565276	-0.37861	2.4781	-2.5864	0.027475	0.29029	-3.8533	pms2	"PMS1 homolog 2, mismatch repair system component"
559824	-0.33268	4.3128	-2.5864	0.027478	0.29029	-3.8533	palmda	palmdelphin a
402943	0.45202	4.4572	2.5856	0.027511	0.29047	-3.8545	stard10	StAR-related lipid transfer (START) domain containing 10
100002541	1.0599	1.1121	2.5842	0.02758	0.291	-3.8569	zgc:172053	zgc:172053
100005476	-0.49294	3.8251	-2.5837	0.0276	0.291	-3.8576	si:dkey-56f14.4	si:dkey-56f14.4
560948	-0.31169	2.6237	-2.5835	0.02761	0.291	-3.858	cip2a	cellular inhibitor of PP2A
555911	-0.35768	3.2509	-2.5826	0.027652	0.29111	-3.8595	npr1b	natriuretic peptide receptor 1b
101885212	-0.44518	2.3602	-2.5826	0.027653	0.29111	-3.8595	si:ch211-278p9.1	si:ch211-278p9.1
554169	-0.82657	0.82054	-2.5819	0.027687	0.2913	-3.8607	nrl	neural retina leucine zipper
402915	-0.76948	0.40364	-2.5802	0.027767	0.2917	-3.8635	sult1st4	"sulfotransferase family 1, cytosolic sulfotransferase 4"
403010	-0.51505	2.578	-2.5798	0.027787	0.2917	-3.8641	nr0b2a	"nuclear receptor subfamily 0, group B, member 2a"
266961	-0.42176	2.1974	-2.5797	0.027789	0.2917	-3.8642	hnf1a	HNF1 homeobox a
100332544	0.33429	4.0093	2.5794	0.027805	0.2917	-3.8648	fermt1	fermitin family member 1
353248	0.39401	4.0704	2.5794	0.027806	0.2917	-3.8648	tnnt2c	"troponin T2c, cardiac"
563470	0.41445	4.839	2.5787	0.02784	0.29173	-3.866	mindy1	MINDY lysine 48 deubiquitinase 1
334500	0.46052	3.1869	2.5779	0.027875	0.29173	-3.8672	scamp2l	"secretory carrier membrane protein 2, like"
368200	0.56253	0.8169	2.5778	0.027881	0.29173	-3.8674	piwil1	piwi-like RNA-mediated gene silencing 1
563047	0.45994	2.0891	2.5776	0.027892	0.29173	-3.8678	btr01	"bloodthirsty-related gene family, member 1"
566537	-0.25965	6.9388	-2.5773	0.027905	0.29173	-3.8682	slc38a2	solute carrier family 38 member 2
327466	-0.37268	5.579	-2.5773	0.027906	0.29173	-3.8683	dyrk1ab	"dual-specificity tyrosine-(Y)-phosphorylation regulated kinase 1A, b"
567619	-0.28612	4.1005	-2.5744	0.028043	0.29256	-3.873	si:dkey-25o16.4	si:dkey-25o16.4
393578	0.41992	4.9688	2.5741	0.028057	0.29256	-3.8735	ufl1	UFM1-specific ligase 1
101885497	1.6854	-3.89	2.5737	0.028079	0.29256	-3.8742	si:ch211-132e22.4	si:ch211-132e22.4
541474	-0.35541	4.7511	-2.5736	0.028079	0.29256	-3.8742	cntn1b	contactin 1b
559954	-0.67769	0.86088	-2.5736	0.028081	0.29256	-3.8743	fn3krp	fructosamine 3 kinase related protein
323089	-0.35592	5.7398	-2.5733	0.028094	0.29256	-3.8748	ctdspl2b	"CTD (carboxy-terminal domain, RNA polymerase II, polypeptide A) small phosphatase like 2b"
100329748	0.56058	3.6663	2.5732	0.028099	0.29256	-3.8749	LOC100329748	myosin-7-like
103910350	-0.27095	4.0042	-2.5729	0.028115	0.29256	-3.8755	si:ch211-110e21.4	si:ch211-110e21.4
664687	-0.39824	3.1984	-2.5721	0.028152	0.29278	-3.8768	kcnj11	potassium inwardly rectifying channel subfamily J member 11
574002	0.43745	2.3972	2.5704	0.028235	0.29347	-3.8796	zgc:114174	zgc:114174
406549	0.52272	6.6469	2.57	0.028256	0.29347	-3.8803	ckap4	cytoskeleton associated protein 4
100002243	0.64608	1.7962	2.5697	0.028268	0.29347	-3.8807	si:ch211-229n2.7	si:ch211-229n2.7
447910	-0.54545	3.8846	-2.5692	0.028293	0.29356	-3.8816	nudt4b	nudix (nucleoside diphosphate linked moiety X)-type motif 4b
794438	0.45596	3.5977	2.5687	0.028315	0.29363	-3.8823	si:ch211-282j17.13	si:ch211-282j17.13
108191692	-1.3267	-3.4323	-2.5683	0.028333	0.29365	-3.8829	si:dkey-32n7.7	si:dkey-32n7.7
555524	-0.97084	-1.424	-2.5668	0.028407	0.29424	-3.8854	drll.2	"draculin-like, tandem duplicate 2"
373121	0.48585	8.5663	2.5653	0.028481	0.29484	-3.888	mknk2b	MAPK interacting serine/threonine kinase 2b
30304	-0.75474	-0.0069986	-2.5636	0.028564	0.2954	-3.8907	tdgf1	teratocarcinoma-derived growth factor 1
494479	-0.26641	7.6838	-2.5635	0.028568	0.2954	-3.8909	perp	p53 apoptosis effector related to pmp22
100148489	1.8256	-1.6685	2.563	0.02859	0.2954	-3.8916	si:ch211-15j1.5	si:ch211-15j1.5
550417	-0.28833	4.7871	-2.5628	0.028601	0.2954	-3.892	dusp11	dual specificity phosphatase 11 (RNA/RNP complex 1-interacting)
550276	0.50528	6.1746	2.5612	0.028679	0.29604	-3.8946	abhd4	abhydrolase domain containing 4
30670	-0.36363	3.2298	-2.5605	0.028717	0.29609	-3.8959	thraa	thyroid hormone receptor alpha a
337158	0.33605	11.475	2.5604	0.028718	0.29609	-3.8959	col1a1a	"collagen, type I, alpha 1a"
792620	0.44221	2.1062	2.5601	0.028733	0.29609	-3.8964	commd6	COMM domain containing 6
797715	-0.31055	5.9743	-2.559	0.02879	0.29651	-3.8984	ogdhb	oxoglutarate (alpha-ketoglutarate) dehydrogenase b (lipoamide)
100331481	1.758	-2.527	2.5577	0.028851	0.2969	-3.9004	psmb11b	proteasome 20S subunit beta 11b
108179091	0.46153	6.0323	2.5575	0.028862	0.2969	-3.9008	LOC108179091	stonustoxin subunit alpha-like
560294	-0.35078	3.5827	-2.5572	0.028878	0.2969	-3.9013	tbl1x	transducin beta like 1 X-linked
567972	0.44027	5.3976	2.5567	0.028901	0.29697	-3.9021	apodb	apolipoprotein Db
324754	-0.33025	2.2217	-2.5558	0.028943	0.29714	-3.9035	gemin4	gem (nuclear organelle) associated protein 4
571193	-0.9319	-3.4082	-2.5557	0.028951	0.29714	-3.9037	cacng1b	"calcium channel, voltage-dependent, gamma subunit 1b"
30496	0.27116	9.0409	2.555	0.028985	0.29732	-3.9049	ldha	lactate dehydrogenase A4
101885083	1.3669	-0.86627	2.5545	0.02901	0.29741	-3.9057	LOC101885083	raftlin-like
793804	0.58166	3.0766	2.5532	0.029073	0.29789	-3.9078	ecrg4b	ECRG4 augurin precursor b
558542	-0.90569	0.52218	-2.5521	0.02913	0.29822	-3.9097	selenoo2	selenoprotein O2
553283	-0.28103	6.8535	-2.5519	0.029139	0.29822	-3.91	pcxa	pyruvate carboxylase a
321155	0.51036	3.9396	2.5513	0.02917	0.29823	-3.911	si:dkey-238i5.2	si:dkey-238i5.2
564165	-0.57642	0.90775	-2.5512	0.029173	0.29823	-3.9111	zgc:172323	zgc:172323
558541	0.43822	3.3243	2.5506	0.029204	0.29838	-3.9121	cyp3c4	"cytochrome P450, family 3, subfamily C, polypeptide 4"
100538024	-0.30809	4.427	-2.5491	0.029278	0.29873	-3.9145	fads6	fatty acid desaturase 6
100149311	-0.51048	1.5411	-2.5491	0.029279	0.29873	-3.9146	or126-4	"odorant receptor, family E, subfamily 126, member 4"
560722	1.2247	-0.41852	2.5486	0.029303	0.29873	-3.9154	emp3b	epithelial membrane protein 3b
101885715	0.46273	4.7738	2.5486	0.029304	0.29873	-3.9154	LOC101885715	inactive ubiquitin carboxyl-terminal hydrolase 53-like
567123	-0.58394	2.1048	-2.5461	0.029429	0.29972	-3.9195	parvab	"parvin, alpha b"
321718	1.1792	0.57796	2.5459	0.029435	0.29972	-3.9197	ybey	ybeY metalloendoribonuclease
569617	0.30224	4.8482	2.5455	0.029456	0.29977	-3.9204	golph3l	golgi phosphoprotein 3-like
447840	0.33208	4.3324	2.5444	0.029511	0.30016	-3.9222	pip5k1bb	"phosphatidylinositol-4-phosphate 5-kinase, type I, beta b"
100332193	2.155	-2.0017	2.5429	0.029589	0.30078	-3.9247	ghsrb	growth hormone secretagogue receptor b
58150	0.46467	3.9731	2.5423	0.029619	0.30091	-3.9257	hand2	heart and neural crest derivatives expressed 2
100415793	1.3856	-1.6956	2.5417	0.029648	0.30104	-3.9266	ugt5c1	"UDP glucuronosyltransferase 5 family, polypeptide C1"
554167	0.72268	0.54102	2.5409	0.029689	0.30116	-3.928	tnfb	"tumor necrosis factor b (TNF superfamily, member 2)"
558964	-0.33833	4.232	-2.5405	0.029707	0.30116	-3.9285	sec14l8	SEC14-like lipid binding 8
557913	-1.0423	0.41554	-2.5404	0.029715	0.30116	-3.9288	omd	osteomodulin
448858	0.46272	4.6093	2.5395	0.02976	0.30116	-3.9303	txnipb	thioredoxin interacting protein b
568985	-0.34057	4.6686	-2.5393	0.029768	0.30116	-3.9305	slc6a1l	"solute carrier family 6 member 1, like"
402976	-0.42261	3.5751	-2.5392	0.029774	0.30116	-3.9307	si:dkey-194e6.1	si:dkey-194e6.1
64260	1.3291	-4.2163	2.5386	0.029804	0.30116	-3.9317	vtg5	vitellogenin 5
558615	-1.1513	-1.506	-2.5386	0.029806	0.30116	-3.9318	zpax2	zona pellucida protein AX 2
692313	4.3651	-3.2735	2.538	0.029836	0.30116	-3.9327	zgc:136461	zgc:136461
560190	0.27506	4.982	2.5378	0.029844	0.30116	-3.933	esrp1	epithelial splicing regulatory protein 1
100003583	0.7436	0.51237	2.5378	0.029844	0.30116	-3.933	si:ch211-145o7.3	si:ch211-145o7.3
723998	0.41457	2.7518	2.5367	0.029901	0.30157	-3.9348	trim109	tripartite motif containing 109
557074	0.34823	4.6468	2.5356	0.029959	0.30174	-3.9367	elk3	ETS transcription factor ELK3
503730	0.31127	8.7665	2.5351	0.029983	0.30174	-3.9374	col2a1b	"collagen, type II, alpha 1b"
541316	0.2735	4.5246	2.5351	0.029984	0.30174	-3.9375	lrrc1	leucine rich repeat containing 1
327276	0.34471	6.6743	2.5349	0.029994	0.30174	-3.9378	slc16a3	solute carrier family 16 member 3
567046	0.56013	2.5071	2.5347	0.030002	0.30174	-3.938	cts12	cathepsin 12
393425	-0.34334	4.1138	-2.5343	0.030024	0.30179	-3.9388	elovl5	ELOVL fatty acid elongase 5
541427	0.32053	3.7907	2.5326	0.03011	0.30242	-3.9415	bscl2l	"BSCL2 lipid droplet biogenesis associated, seipin, like"
100537402	1.5606	-2.9865	2.5324	0.03012	0.30242	-3.9418	si:ch73-368j24.12	si:ch73-368j24.12
30544	-0.92998	0.42001	-2.5318	0.030151	0.30257	-3.9428	sox17	SRY-box transcription factor 17
793236	-0.57377	1.9192	-2.5304	0.030225	0.30293	-3.9452	LOC793236	flavin-containing monooxygenase FMO GS-OX-like 1
100535926	-2.1007	-3.0734	-2.5304	0.030226	0.30293	-3.9452	si:ch73-343g19.4	si:ch73-343g19.4
100148281	-0.34769	3.4509	-2.5301	0.030238	0.30293	-3.9456	wdr89	WD repeat domain 89
494472	-0.50875	1.6944	-2.5298	0.030258	0.30296	-3.9462	otop2	otopetrin 2
569338	0.32479	4.9725	2.5277	0.030361	0.3037	-3.9495	serinc2	serine incorporator 2
100002256	-0.36554	2.2452	-2.5277	0.030365	0.3037	-3.9496	pik3ap1	phosphoinositide-3-kinase adaptor protein 1
574421	0.44629	3.6345	2.5273	0.030386	0.30374	-3.9503	nif3l1	NIF3 NGG1 interacting factor 3-like 1 (S. cerevisiae)
266985	-0.3738	6.9573	-2.5269	0.030403	0.30374	-3.9508	npm1a	nucleophosmin 1a
553294	-0.45432	2.4083	-2.5259	0.030459	0.30406	-3.9526	ube3d	ubiquitin protein ligase E3D
406774	-0.24231	5.978	-2.5254	0.030485	0.30406	-3.9534	sec23a	"Sec23 homolog A, coat complex II component"
797197	-1.0863	-0.36938	-2.525	0.030503	0.30406	-3.954	tex11	testis expressed 11
100333430	-2.0257	-2.1423	-2.5247	0.03052	0.30406	-3.9545	ly6m6	lymphocyte antigen 6 family member M6
393701	0.42459	5.0792	2.5246	0.030525	0.30406	-3.9547	ssu72	"SSU72 homolog, RNA polymerase II CTD phosphatase"
336770	-0.31277	6.452	-2.5244	0.030536	0.30406	-3.955	abcf2a	"ATP-binding cassette, sub-family F (GCN20), member 2a"
140599	0.48486	6.9264	2.5236	0.030578	0.30416	-3.9564	vim	vimentin
569854	0.3393	4.0077	2.5235	0.03058	0.30416	-3.9564	si:ch73-174h16.4	si:ch73-174h16.4
353180	-0.44677	3.1801	-2.5226	0.03063	0.30449	-3.958	mchr1b	melanin-concentrating hormone receptor 1b
393421	-0.36598	4.7141	-2.5209	0.030719	0.30521	-3.9608	etnppl	ethanolamine-phosphate phospho-lyase
566242	0.38529	3.6916	2.52	0.030766	0.30551	-3.9623	slc41a2b	solute carrier family 41 member 2b
799147	-1.1034	1.9233	-2.5184	0.030848	0.30615	-3.9648	si:ch211-240l19.6	si:ch211-240l19.6
445409	1.2424	-1.9295	2.5177	0.030887	0.30637	-3.966	her11	hairy-related 11
560596	0.34726	4.4759	2.5157	0.030988	0.30707	-3.9692	tprg1	tumor protein p63 regulated 1
791484	-1.0891	-0.31379	-2.5154	0.031008	0.30707	-3.9698	rbp1.1	"retinol binding protein 1, cellular, tandem duplicate 1"
447861	0.2697	4.9653	2.5154	0.031008	0.30707	-3.9698	rnf103	ring finger protein 103
559576	-0.35351	3.2299	-2.514	0.031081	0.30744	-3.972	cgref1	cell growth regulator with EF-hand domain 1
335654	-0.26798	5.5762	-2.5138	0.031088	0.30744	-3.9723	camk1ga	calcium/calmodulin-dependent protein kinase IGa
553469	0.35832	3.366	2.5136	0.031102	0.30744	-3.9727	ca15a	carbonic anhydrase XVa
556599	0.27869	2.0682	2.5131	0.031125	0.30744	-3.9734	si:ch211-10d23.5	si:ch211-10d23.5
100005114	-0.33214	2.8927	-2.513	0.031131	0.30744	-3.9736	si:ch1073-184j22.2	si:ch1073-184j22.2
571487	-2.5527	-1.6953	-2.5124	0.031163	0.30759	-3.9746	myo1g	myosin IG
100125749	-0.24202	5.5658	-2.5121	0.031183	0.30761	-3.9752	clstn2	calsyntenin 2
378987	-0.45255	4.8513	-2.5112	0.031226	0.30787	-3.9765	zgc:77439	zgc:77439
492475	-0.64459	0.2604	-2.5108	0.031251	0.30795	-3.9773	trim35-29	tripartite motif containing 35-29
100003245	-0.44068	6.1724	-2.5103	0.031277	0.30801	-3.9781	nat16	N-acetyltransferase 16
100331568	0.32064	3.0108	2.5099	0.031298	0.30801	-3.9787	sh2d3a	SH2 domain containing 3A
553372	0.28432	5.0423	2.5097	0.031309	0.30801	-3.9791	zcchc8	"zinc finger, CCHC domain containing 8"
566673	0.3398	5.0457	2.5088	0.031359	0.30804	-3.9806	frem2b	FRAS1 related extracellular matrix 2b
30395	0.45474	3.633	2.5084	0.031378	0.30804	-3.9812	twist2	twist2
559723	0.3705	3.4587	2.5084	0.031379	0.30804	-3.9812	tgfb5	"transforming growth factor, beta 5"
393185	-0.37943	2.8	-2.5083	0.031385	0.30804	-3.9814	trmt11	tRNA methyltransferase 11 homolog
571561	-0.88152	0.43619	-2.508	0.031397	0.30804	-3.9818	LOC571561	UDP-glucuronosyltransferase 2B20-like
556909	0.27015	4.6815	2.5068	0.031461	0.30842	-3.9837	fbxo22	F-box protein 22
494041	-0.28238	4.6487	-2.5065	0.031477	0.30842	-3.9842	slc7a2	solute carrier family 7 member 2
559426	-0.60028	1.9973	-2.5061	0.031502	0.30842	-3.985	si:dkey-246g23.4	si:dkey-246g23.4
558785	1.6726	-2.4631	2.506	0.031504	0.30842	-3.985	si:dkey-73p2.1	si:dkey-73p2.1
561682	0.38201	2.5227	2.5054	0.031537	0.3085	-3.986	nfatc4	nuclear factor of activated T cells 4
570410	0.75368	0.88974	2.5051	0.031552	0.3085	-3.9865	ptger2b	prostaglandin E receptor 2b (subtype EP2)
140747	0.47911	2.1176	2.5049	0.031564	0.3085	-3.9869	cxcr4a	chemokine (C-X-C motif) receptor 4a
554157	0.82676	3.0277	2.5041	0.03161	0.30873	-3.9883	ctss2.1	"cathepsin S, ortholog2, tandem duplicate 1"
562950	0.54757	5.5351	2.5038	0.031621	0.30873	-3.9886	si:dkey-7c18.24	si:dkey-7c18.24
337597	-0.52574	1.3304	-2.5033	0.031652	0.30876	-3.9895	lgals9l1	"lectin, galactoside-binding, soluble, 9 (galectin 9)-like 1"
100333355	1.8134	-4.4477	2.5029	0.031674	0.30876	-3.9902	LOC100333355	GTPase IMAP family member 4-like
393617	0.2594	4.9681	2.5027	0.031682	0.30876	-3.9905	nat10	N-acetyltransferase 10
100537628	-1.6787	-2.4216	-2.5025	0.031693	0.30876	-3.9908	trim62.2	"tripartite motif containing 62, tandem duplicate 2"
101882585	-0.57128	1.4648	-2.5021	0.031716	0.30882	-3.9915	si:dkey-32n7.4	si:dkey-32n7.4
368704	0.23494	5.6654	2.5013	0.031761	0.30902	-3.9928	ctsc	cathepsin C
564183	1.1321	0.82379	2.5011	0.031772	0.30902	-3.9932	hce2l1	high choriolytic enzyme 2-like 1
100149106	-1.5689	-2.1125	-2.4995	0.031854	0.30965	-3.9956	ankef1b	ankyrin repeat and EF-hand domain containing 1b
100141341	0.45039	4.5274	2.4963	0.032032	0.31122	-4.001	arhgap17b	Rho GTPase activating protein 17b
572368	0.46689	1.2223	2.4946	0.032121	0.31185	-4.0037	tekt3	tektin 3
100002463	-0.47893	4.6082	-2.4943	0.032137	0.31185	-4.0041	pprc1	PPARG related coactivator 1
550567	-0.28461	4.9217	-2.4941	0.032149	0.31185	-4.0045	shisa4	shisa family member 4
564970	0.41712	3.6564	2.493	0.032212	0.31221	-4.0064	slc2a11b	solute carrier family 2 member 11b
100537391	0.49561	2.2759	2.4928	0.032221	0.31221	-4.0066	cfap410	cilia and flagella associated protein 410
555768	-1.0295	-1.153	-2.4923	0.03225	0.31232	-4.0075	cuzd1.2	"CUB and zona pellucida-like domains 1, tandem duplicate 2"
557166	-0.53374	3.2513	-2.4903	0.032361	0.31318	-4.0108	acmsd	aminocarboxymuconate semialdehyde decarboxylase
326931	0.3486	6.7337	2.49	0.032373	0.31318	-4.0112	cnn3a	"calponin 3, acidic a"
103911274	0.37196	3.13	2.4897	0.032394	0.31322	-4.0118	si:ch211-105j21.9	si:ch211-105j21.9
337132	0.37308	6.2247	2.4879	0.032493	0.31383	-4.0147	anxa5b	annexin A5b
570586	-1.0622	1.1579	-2.4879	0.032493	0.31383	-4.0147	msantd4	Myb/SANT-like DNA-binding domain containing 4 with coiled-coils
798697	0.72888	1.3987	2.4869	0.032547	0.31416	-4.0163	gfi1ab	growth factor independent 1A transcription repressor b
554272	-0.52447	-0.28461	-2.4865	0.032566	0.31416	-4.0169	rhd	"Rh blood group, D antigen"
100148408	0.32773	4.5889	2.4863	0.032579	0.31416	-4.0172	foxc1a	forkhead box C1a
322473	-0.94306	-0.62928	-2.4849	0.032659	0.31447	-4.0196	lpar5a	lysophosphatidic acid receptor 5a
100005036	0.34226	3.8171	2.4846	0.032673	0.31447	-4.02	spryd3	SPRY domain containing 3
406473	-0.36403	7.2921	-2.4845	0.032677	0.31447	-4.0201	pck2	phosphoenolpyruvate carboxykinase 2 (mitochondrial)
415190	0.4066	7.1689	2.4845	0.03268	0.31447	-4.0202	zgc:86896	zgc:86896
556980	0.35707	2.6437	2.4835	0.032735	0.31452	-4.0218	sdccag8	serologically defined colon cancer antigen 8
100536873	-0.34116	3.7067	-2.4834	0.032738	0.31452	-4.0219	acot12	acyl-CoA thioesterase 12
393355	0.59967	1.6246	2.4834	0.032739	0.31452	-4.0219	mif4gda	MIF4G domain containing a
560084	0.83164	-0.18426	2.4828	0.032775	0.31471	-4.023	si:dkey-233e3.2	si:dkey-233e3.2
60647	1.3149	-3.6048	2.4822	0.03281	0.31471	-4.024	nitr2b	novel immune-type receptor 2b
436584	0.61416	1.6225	2.4819	0.032822	0.31471	-4.0244	gcgb	glucagon b
352917	0.40452	7.0075	2.4818	0.032828	0.31471	-4.0246	selenot2	"selenoprotein T, 2"
565335	-0.35532	3.2873	-2.4802	0.032917	0.31517	-4.0271	slc25a15b	solute carrier family 25 member 15b
100537478	-0.69698	3.7263	-2.4801	0.032927	0.31517	-4.0275	ubxn2a	UBX domain protein 2A
101882881	1.3299	-2.2826	2.48	0.032928	0.31517	-4.0275	dok2l	docking protein 2-like
322178	0.28485	4.5078	2.4797	0.032948	0.3152	-4.0281	si:ch211-168f7.5	si:ch211-168f7.5
405851	0.35893	4.3737	2.4792	0.032975	0.31529	-4.0289	spast	spastin
84040	0.51867	4.1782	2.4783	0.033024	0.31554	-4.0303	clic3	chloride intracellular channel 3
352939	1.6854	-4.3174	2.4778	0.033054	0.31554	-4.0311	pnx	posterior neuron-specific homeobox
393551	0.39109	3.8884	2.4778	0.033055	0.31554	-4.0312	cyba	"cytochrome b-245, alpha polypeptide"
100147862	0.46852	2.5667	2.4765	0.033127	0.31606	-4.0332	si:dkey-23f9.4	si:dkey-23f9.4
393404	-0.80221	1.9816	-2.4728	0.033334	0.31788	-4.0392	fbxo30b	F-box protein 30b
768157	-0.38346	6.5042	-2.4718	0.03339	0.31824	-4.0408	cplx4a	complexin 4a
393410	-0.28992	4.7842	-2.4714	0.033417	0.31829	-4.0416	gpsm2	G protein signaling modulator 2
323424	0.30165	5.6766	2.4711	0.03343	0.31829	-4.042	sult1st1	"sulfotransferase family 1, cytosolic sulfotransferase 1"
568202	0.24238	6.5527	2.4701	0.033488	0.31866	-4.0436	pora	P450 (cytochrome) oxidoreductase a
406723	0.31778	5.3414	2.4697	0.033511	0.31872	-4.0443	exoc7	exocyst complex component 7
664718	0.53569	7.2683	2.4689	0.033556	0.31888	-4.0456	krt1-19d	"keratin, type 1, gene 19d"
30345	0.35619	2.9097	2.4686	0.033574	0.31888	-4.0461	hoxc4a	homeobox C4a
767708	-0.83631	2.3523	-2.4685	0.033581	0.31888	-4.0463	hs3st3b1a	heparan sulfate (glucosamine) 3-O-sulfotransferase 3B1a
393767	-0.30582	6.3773	-2.4664	0.0337	0.31984	-4.0497	rom1a	retinal outer segment membrane protein 1a
101885988	-0.42361	1.2722	-2.4654	0.033756	0.31997	-4.0513	si:dkey-256k13.2	si:dkey-256k13.2
101886382	-1.0808	-1.172	-2.4654	0.03376	0.31997	-4.0514	rps11b	ribosomal protein S11b
566555	0.49047	3.2111	2.4653	0.033767	0.31997	-4.0516	abcc6a	"ATP-binding cassette, sub-family C (CFTR/MRP), member 6a"
566732	0.32037	5.9214	2.4647	0.033797	0.32	-4.0524	znf292b	zinc finger protein 292b
555288	0.48022	2.3268	2.4646	0.033806	0.32	-4.0527	slc35a2	solute carrier family 35 member 2
100141330	0.88404	2.3065	2.464	0.033839	0.32008	-4.0536	zgc:171534	zgc:171534
796407	-0.49276	5.0238	-2.4633	0.03388	0.32008	-4.0548	nrip1a	nuclear receptor interacting protein 1a
100002665	-0.66701	1.9568	-2.4629	0.033903	0.32008	-4.0555	lenep	lens epithelial protein
571755	-1.3796	-1.3078	-2.4629	0.033904	0.32008	-4.0555	si:ch211-170d8.2	si:ch211-170d8.2
558042	0.6312	4.137	2.4627	0.033915	0.32008	-4.0558	ppil1	peptidylprolyl isomerase (cyclophilin)-like 1
554097	0.41376	2.4901	2.4626	0.033921	0.32008	-4.056	554097	NA
100334514	1.0236	-0.39206	2.462	0.033951	0.3202	-4.0568	si:ch1073-228j22.2	si:ch1073-228j22.2
100332583	-1.3949	-1.7462	-2.4617	0.03397	0.32021	-4.0573	LOC100332583	toll-like receptor 8
393159	0.32854	6.0493	2.4605	0.03404	0.32063	-4.0593	snap23.1	synaptosome associated protein 23.1
641416	-0.88309	-1.8025	-2.4603	0.034055	0.32063	-4.0597	or115-12	"odorant receptor, family F, subfamily 115, member 12"
327007	0.2616	5.1195	2.46	0.034068	0.32063	-4.0601	vamp8	vesicle-associated membrane protein 8 (endobrevin)
561901	0.2607	8.052	2.459	0.03413	0.32096	-4.0618	thbs1b	thrombospondin 1b
568726	-0.28299	4.5187	-2.4586	0.034153	0.32096	-4.0625	adcy7	adenylate cyclase 7
570095	0.75027	0.33192	2.4585	0.034156	0.32096	-4.0626	si:ch211-139n6.3	si:ch211-139n6.3
406272	-0.35886	4.829	-2.4572	0.034234	0.32152	-4.0648	sema6d	"sema domain, transmembrane domain (TM), and cytoplasmic domain, (semaphorin) 6D"
557933	-0.42432	2.4198	-2.4562	0.034292	0.3219	-4.0664	si:dkey-165a24.9	si:dkey-165a24.9
798252	-0.52597	4.3632	-2.4551	0.034354	0.32209	-4.0681	eps8l2	EPS8 like 2
791149	-0.49476	2.7432	-2.4547	0.034376	0.32209	-4.0687	rd3	"retinal degeneration 3, GUCY2D regulator"
407713	-2.0168	-3.7036	-2.4546	0.034384	0.32209	-4.0689	tbpl2	TATA box binding protein like 2
555257	0.27775	4.859	2.4546	0.034384	0.32209	-4.0689	synrg	"synergin, gamma"
564554	0.34138	3.4202	2.4529	0.034485	0.32287	-4.0717	564554	NA
100001066	0.78151	-0.80197	2.4524	0.034511	0.32295	-4.0725	si:dkey-10c21.1	si:dkey-10c21.1
558500	-0.28058	3.6762	-2.4519	0.034541	0.32295	-4.0733	oxnad1	oxidoreductase NAD-binding domain containing 1
557518	-0.36764	7.6265	-2.4518	0.034547	0.32295	-4.0735	tkta	transketolase a
445281	-0.35445	3.8932	-2.4493	0.034697	0.32418	-4.0776	cyp8b1	"cytochrome P450, family 8, subfamily B, polypeptide 1"
493181	1.0859	0.45696	2.4487	0.034729	0.32431	-4.0785	fgf7	fibroblast growth factor 7
100332480	0.41428	0.9597	2.4479	0.034775	0.32457	-4.0798	si:dkey-120c6.5	si:dkey-120c6.5
100002038	0.50641	4.1663	2.4468	0.03484	0.32502	-4.0816	si:rp71-17i16.4	si:rp71-17i16.4
553311	0.37881	2.9527	2.4451	0.034943	0.32578	-4.0844	p3h3	prolyl 3-hydroxylase 3
797890	-0.45986	1.6466	-2.4449	0.034958	0.32578	-4.0848	2022-10-02	organic cation transporter 2
368619	-1.4197	-3.1542	-2.4438	0.035021	0.32592	-4.0865	cldn10a	claudin 10a
571789	-0.92149	-0.76249	-2.4437	0.035027	0.32592	-4.0867	spag8	sperm associated antigen 8
561579	2.7018	-4.0215	2.4436	0.035033	0.32592	-4.0868	trim35-21	tripartite motif containing 35-21
101885590	-1.5473	-1.8704	-2.4433	0.03505	0.32592	-4.0873	LOC101885590	growth/differentiation factor 6-A-like
556343	0.47472	1.9647	2.4431	0.035064	0.32592	-4.0877	lrrc31	leucine rich repeat containing 31
405860	0.32336	5.6516	2.4423	0.035111	0.32619	-4.089	igfbp7	insulin-like growth factor binding protein 7
557053	-0.42063	2.1088	-2.4416	0.03515	0.32629	-4.09	opn6b	"opsin 6, group member b"
561172	0.44533	2.3286	2.4415	0.035158	0.32629	-4.0902	b3gnt3.4	"UDP-GlcNAc:betaGal beta-1,3-N-acetylglucosaminyltransferase 3, tandem duplicate 4"
554176	-0.42724	2.935	-2.4406	0.035214	0.32664	-4.0918	cygb2	cytoglobin 2
402988	0.67512	0.2483	2.4393	0.035291	0.32713	-4.0939	dnaaf4	dynein axonemal assembly factor 4
559095	0.36249	2.6374	2.4391	0.035303	0.32713	-4.0942	zgc:172145	zgc:172145
559232	-0.8094	4.0467	-2.4386	0.035332	0.32723	-4.095	si:ch73-167i17.6	si:ch73-167i17.6
84703	-0.36101	4.8145	-2.4379	0.035374	0.32733	-4.0961	slc4a1a	solute carrier family 4 member 1a (Diego blood group)
352937	-0.66354	0.8142	-2.4378	0.035382	0.32733	-4.0963	dio2	iodothyronine deiodinase 2
336977	0.31641	5.776	2.4375	0.035397	0.32733	-4.0967	hagh	hydroxyacylglutathione hydrolase
559804	-0.86386	0.72379	-2.4365	0.035459	0.32773	-4.0984	rnf150a	ring finger protein 150a
799571	0.60895	2.0519	2.4354	0.035525	0.3279	-4.1002	foxb1b	forkhead box B1b
100126803	-1.7862	-3.3499	-2.4352	0.035539	0.3279	-4.1006	ifnphi3	interferon phi 3
393150	-0.28228	4.7154	-2.4351	0.035542	0.3279	-4.1006	sh3gl3b	SH3-domain GRB2-like 3b
100000702	-1.3476	-0.3393	-2.435	0.03555	0.3279	-4.1009	si:ch211-105f12.2	si:ch211-105f12.2
100334610	0.94198	0.46722	2.4346	0.035575	0.32797	-4.1015	nppb	natriuretic peptide B
323561	0.28755	8.3666	2.4317	0.035749	0.3294	-4.1062	col4a5	"collagen, type IV, alpha 5 (Alport syndrome)"
100034506	0.35963	4.0936	2.4307	0.035807	0.32968	-4.1077	tmem238a	transmembrane protein 238a
100005373	-0.29144	4.1704	-2.4306	0.035816	0.32968	-4.108	greb1l	GREB1 like retinoic acid receptor coactivator
555962	-0.72349	1.6613	-2.4295	0.03588	0.32982	-4.1097	tgm1l4	transglutaminase 1 like 4
794315	0.38277	7.911	2.4295	0.035884	0.32982	-4.1098	and1	actinodin1
393548	0.4716	4.3488	2.4294	0.035886	0.32982	-4.1099	gadd45aa	"growth arrest and DNA-damage-inducible, alpha, a"
387258	0.5178	3.6207	2.4274	0.036012	0.33056	-4.1132	foxi3b	forkhead box I3b
393891	0.61138	5.3852	2.4272	0.036023	0.33056	-4.1135	fbxo32	F-box protein 32
58084	0.43926	8.4504	2.4269	0.036042	0.33056	-4.114	tnnt3a	"troponin T type 3a (skeletal, fast)"
570268	-0.63809	0.79621	-2.4267	0.036054	0.33056	-4.1143	osgin2	oxidative stress induced growth inhibitor family member 2
64607	-0.34889	3.9827	-2.4261	0.036088	0.33056	-4.1152	alas2	"aminolevulinate, delta-, synthase 2"
81580	0.28499	3.6281	2.426	0.036094	0.33056	-4.1154	cldna	claudin a
558937	-0.24168	3.9134	-2.426	0.036096	0.33056	-4.1154	dhx32b	DEAH (Asp-Glu-Ala-His) box polypeptide 32b
572187	0.27806	5.3165	2.4245	0.036191	0.33105	-4.1179	dock1	dedicator of cytokinesis 1
561469	-0.35762	4.2022	-2.4244	0.036196	0.33105	-4.1181	atp6v0a2a	ATPase H+ transporting V0 subunit a2a
58008	0.30703	5.3056	2.4242	0.036204	0.33105	-4.1183	hey1	hes-related family bHLH transcription factor with YRPW motif 1
503592	0.53015	0.86427	2.4239	0.036227	0.3311	-4.1189	zgc:113442	zgc:113442
563095	0.6201	0.26434	2.4235	0.036251	0.33115	-4.1195	mrm1	mitochondrial rRNA methyltransferase 1 homolog (S. cerevisiae)
445025	0.41837	3.5908	2.4228	0.036294	0.33125	-4.1207	slc10a7	solute carrier family 10 member 7
100884154	1.6854	-4.256	2.4224	0.036316	0.33125	-4.1212	dicp1.17	diverse immunoglobulin domain-containing protein 1.17
387291	-0.27623	5.2922	-2.4224	0.036318	0.33125	-4.1213	sp4	sp4 transcription factor
110437775	-0.55192	9.3964	-2.422	0.036339	0.33128	-4.1219	LOC110437775	"retinal rod rhodopsin-sensitive cGMP 3',5'-cyclic phosphodiesterase subunit gamma-like"
114403	-0.47662	3.0091	-2.4207	0.036421	0.33145	-4.124	gja8b	gap junction protein alpha 8 paralog b
58032	0.34808	3.0379	2.4207	0.036421	0.33145	-4.124	edn1	endothelin 1
567858	-0.36655	3.3101	-2.4206	0.036428	0.33145	-4.1242	ponzr1	plac8 onzin related protein 1
80959	0.30027	4.1629	2.4205	0.036432	0.33145	-4.1243	pard6gb	par-6 family cell polarity regulator gamma b
504078	-0.42828	1.3446	-2.4198	0.036477	0.3317	-4.1255	sod3a	"superoxide dismutase 3, extracellular a"
436979	-0.41579	2.6811	-2.4194	0.0365	0.33174	-4.1261	lygl1	lysozyme g-like 1
449790	0.44065	3.8504	2.4178	0.036599	0.33248	-4.1287	cyp2k16	"cytochrome P450, family 2, subfamily K, polypeptide16"
30466	0.43263	4.0657	2.4175	0.036621	0.33251	-4.1292	ascl1a	achaete-scute family bHLH transcription factor 1a
402839	1.411	-2.1634	2.416	0.036715	0.33319	-4.1317	fkbp6	FKBP prolyl isomerase 6
798918	-0.23452	6.3243	-2.4154	0.036754	0.33337	-4.1327	ahcyl1	adenosylhomocysteinase-like 1
100101640	-0.47283	10.538	-2.4151	0.036773	0.33338	-4.1332	apoa1b	apolipoprotein A-Ib
560653	-0.44502	2.8101	-2.4144	0.036812	0.33357	-4.1342	npr1a	natriuretic peptide receptor 1a
100884146	-0.56668	0.96185	-2.4138	0.036853	0.33362	-4.1353	selplg	selectin P ligand
553601	0.37126	1.8845	2.4135	0.036872	0.33362	-4.1358	zgc:110249	zgc:110249
555939	-0.34814	3.2483	-2.4132	0.036891	0.33362	-4.1362	avpr1ab	arginine vasopressin receptor 1Ab
334289	-1.3269	0.27068	-2.4131	0.036894	0.33362	-4.1363	clca1	chloride channel accessory 1
100534995	-0.41374	1.3333	-2.4126	0.036924	0.33362	-4.1371	dpep2	dipeptidase 2
555689	1.9299	-2.0331	2.4126	0.036929	0.33362	-4.1372	si:ch211-210b2.3	si:ch211-210b2.3
100148319	0.35753	4.8064	2.4103	0.037072	0.33456	-4.1409	si:dkey-17o15.2	si:dkey-17o15.2
101887154	-1.3616	-1.256	-2.4102	0.037081	0.33456	-4.1411	tmem182b	transmembrane protein 182b
569392	-0.49502	1.5974	-2.41	0.037088	0.33456	-4.1413	tmem98	transmembrane protein 98
259260	-0.31083	3.7277	-2.4096	0.037112	0.33461	-4.142	mst1	macrophage stimulating 1
[truncated: 16,024 more rows]

## Sheet: DEA-OBS20-S
EntrezID	logFC	AveExpr	t	P.Value	adj.P.Val	B	Symbols	Name
s2f_0024990001	5.089	1.7962	6.1861	9.877e-05	0.020041	1.7534	SCPP9	secretory calcium-binding phosphoprotein 9
s2f_0005166002	4.4159	0.11316	5.0668	0.00047148	0.048052	0.24274	PRL	prolactin
s2f_0008962001	-4.3585	0.37189	-12.731	1.5058e-07	0.0010113	7.4055	AHSG	alpha-2-hs-glycoprotein-like
s2f_0035056001	-4.2759	-2.6933	-4.6448	0.00089004	0.067879	-0.3783	APOC4	apolipoprotein c-iv
s2f_0000016100	3.8762	-1.7762	5.5213	0.00024471	0.032954	0.88017	s2f_0000016100	uncharacterized protein
s2f_0021379001	3.5736	-2.0023	3.1732	0.0098082	0.23204	-2.7282	s2f_0021379001	triggering receptor expressed on myeloid cells 1
s2f_0012721001	3.3653	-2.4194	5.9311	0.00013888	0.023592	1.4267	SI:DKEYP-122A9.1	calcium homeostasis modulator protein 6-like
s2f_0000000042	3.3648	1.1983	7.0307	3.392e-05	0.011524	2.7649	s2f_0000000042	uncharacterized protein k02a2.6-like
s2f_0004493003	-3.3599	1.1587	-6.5618	6.0719e-05	0.015948	2.2165	IDO2	indoleamine 2,3-dioxygenase 2
s2f_0001766008	3.2394	-3.5817	5.9311	0.00013889	0.023592	1.4267	FAM20CL	extracellular serine/threonine protein kinase fam20c-like
s2f_0051474001	-3.0949	-1.8406	-3.1582	0.010063	0.23539	-2.7531	SI:DKEY-250K15.4	uncharacterized loc108266442
s2f_0000483018	-3.0711	2.1047	-8.9806	3.9198e-06	0.0034467	4.7284	APCS	serum amyloid p-component-like
s2f_0000293011	-3.0209	-3.6312	-4.7586	0.00074808	0.061786	-0.2082	SI:DKEYP-75B4.10	galactose-specific lectin nattectin-like
s2f_0011641001	-3.0057	-1.662	-6.2963	8.5464e-05	0.018736	1.8916	s2f_0011641001	hypothetical protein
s2f_0000347016	-2.988	2.184	-9.6556	2.0216e-06	0.0031231	5.304	ZGC:154142	ovochymase-2-like
s2f_0004226011	2.9745	-2.3168	6.92	3.8822e-05	0.012347	2.6384	s2f_0004226011	uncharacterized loc106610709
s2f_0018644001	2.947	-0.74963	3.3826	0.0068707	0.19713	-2.3815	TMEM119	transmembrane protein 119
s2f_0000016150	-2.8443	-2.8516	-5.3034	0.00033389	0.039928	0.57867	s2f_0000016150	hypothetical protein
s2f_0000229014	2.837	-3.25	2.8874	0.016014	0.2924	-3.2028	CCR7	c-c chemokine receptor type 7
s2f_0001510002	-2.7952	-1.3541	-3.6237	0.0045826	0.16429	-1.9856	IGFALS	insulin-like growth factor-binding protein complex acid labile subunit
s2f_0001712007	2.7567	-1.6426	3.0078	0.013021	0.26554	-3.003	IL-17N	interleukin-17a-like
s2f_0000149016	2.668	-1.1937	4.2938	0.0015394	0.091312	-0.91547	COL10A1	collagen alpha-1(x) chain-like
s2f_0000287012	-2.6675	-3.3628	-3.7645	0.0036274	0.14871	-1.7565	TBX16L	t-box transcription factor tbx6l-like
s2f_0000753013	2.6558	1.5142	5.3168	0.00032748	0.039478	0.5975	SI:DKEYP-94G1.1	macrophage mannose receptor 1-like
s2f_0019185001	2.6183	0.068325	4.6458	0.00088872	0.067879	-0.37684	KEL	kell blood group glycoprotein isoform x1
s2f_0008805030	-2.6147	-1.7017	-3.5734	0.0049839	0.17012	-2.0677	s2f_0008805030	carcinoembryonic antigen-related cell adhesion molecule 2-like
s2f_0001238002	2.5914	-3.52	3.8586	0.0031065	0.13499	-1.6045	RAB41	ras-related protein rab6 isoform x1
s2f_0010024001	2.5887	-0.33437	4.0691	0.0022051	0.11015	-1.2682	CGA	glycoprotein hormones alpha chain
s2f_0011220001	2.5779	3.719	6.5047	6.5304e-05	0.016003	2.1475	ANKRD37	ankyrin repeat domain-containing protein 37
s2f_0007051001	2.5554	1.4215	4.9433	0.00056633	0.054006	0.063882	GH1	somatotropin
s2f_0000051054	-2.5427	-2.3537	-4.4157	0.0012702	0.08184	-0.72689	s2f_0000051054	protocadherin gamma-a11-like
s2f_0003201002	-2.5427	-1.8488	-2.9361	0.014728	0.28393	-3.1221	CSTA	cystatin-b-like
s2f_0000149019	2.541	6.2563	11.319	4.5977e-07	0.0011454	6.5355	COL10A1A	collagen alpha-1(x) chain-like
s2f_0002340021	-2.5057	-3.4103	-3.7615	0.0036454	0.14888	-1.7614	OR42B1	olfactory receptor 13c2-like
s2f_0006902002	-2.4971	-2.0706	-4.1013	0.0020936	0.10681	-1.2173	TEX11	testis-expressed protein 11
s2f_0001379003	-2.4844	-1.9187	-3.755	0.0036848	0.14896	-1.7719	SYTL3	synaptotagmin-like protein 3
s2f_0005879069	-2.4652	-2.7359	-2.8624	0.016719	0.29542	-3.2443	s2f_0005879069	gastrula zinc finger protein xlcgf16.1-like
s2f_0003996016	2.4461	-3.7498	4.9939	0.00052526	0.051997	0.13737	s2f_0003996016	uncharacterized protein loc105200580
s2f_0005630001	-2.4218	-2.7521	-4.3898	0.001323	0.08398	-0.76685	SI:DKEY-183C6.7	urea transporter 2-like
s2f_0000299001	-2.4092	-3.8548	-3.6114	0.0046773	0.16568	-2.0056	FAL1	eukaryotic initiation factor 4a-iii
s2f_0006674001	-2.3899	-2.3003	-2.3026	0.043806	0.45505	-4.1594	SYCP3	synaptonemal complex protein 3-like
s2f_0098901001	-2.3848	-2.8508	-2.3774	0.038537	0.43701	-4.0394	s2f_0098901001	uncharacterized protein loc116408820
s2f_0007906002	-2.3662	0.13566	-2.2231	0.050157	0.47799	-4.2854	NOSTRIN	nostrin isoform x1
s2f_0002590002	-2.3565	-3.4001	-3.1764	0.0097551	0.23152	-2.723	PARG	poly(adp-ribose) glycohydrolase isoform x1
s2f_0005082004	-2.3349	0.8751	-8.6276	5.6307e-06	0.0042084	4.4076	FAM151A	protein fam151a
s2f_0000968010	2.3341	4.9484	18.528	3.9287e-09	5.8726e-05	9.8326	ZGC:163022	putative ferric-chelate reductase 1
s2f_0001468012	-2.3288	-2.4517	-2.3234	0.042273	0.45218	-4.1261	RARB	retinoic acid receptor beta isoform x1
s2f_0001486007	2.3087	-2.7611	2.4856	0.032007	0.4061	-3.8644	ASCL5	achaete-scute homolog 5
s2f_0001913003	-2.2883	-3.5594	-3.5548	0.0051416	0.17194	-2.0982	RPL34	60s ribosomal protein l34
s2f_0061759001	-2.2658	4.8964	-9.2646	2.9526e-06	0.0033951	4.9764	SI:CH211-182P11.1	sushi, nidogen and egf-like domain-containing protein 1
s2f_0000344018	-2.26	-1.7846	-3.948	0.0026838	0.12616	-1.461	CCL20B	c-c motif chemokine 20-like
s2f_0019960001	-2.26	-1.9419	-3.1049	0.011024	0.24604	-2.8417	FGF6	fibroblast growth factor 23-like
s2f_0000673010	-2.26	-3.373	-3.0515	0.01208	0.25732	-2.9304	s2f_0000673010	b-cell receptor cd22-like
s2f_0001862001	-2.2514	-2.2157	-2.6057	0.026027	0.37373	-3.6681	TOX4	tox high mobility group box family member 4
s2f_0000646003	2.2447	7.3127	11.624	3.5762e-07	0.0010691	6.7359	PRDX1	peroxiredoxin-1
s2f_0008746001	2.2399	-2.9869	2.3157	0.04283	0.45431	-4.1383	COLQ	acetylcholinesterase collagenic tail peptide isoform x1
s2f_0012275001	-2.2387	-1.9314	-3.1039	0.011042	0.24604	-2.8433	FAM216A	protein fam216a
s2f_0335850001	2.2362	-0.85874	3.5304	0.0053564	0.1752	-2.1383	s2f_0335850001	uncharacterized protein loc100536426
s2f_0002535002	2.2336	4.593	6.0767	0.00011419	0.022168	1.6146	EGLN3	egl nine homolog 3
s2f_0021264001	2.2219	3.3787	7.3631	2.2813e-05	0.0091665	3.1346	ENAM	enamelin
s2f_0001863010	-2.2195	-3.1492	-2.7339	0.020865	0.33374	-3.457	SI:DKEY-243K1.3	endonuclease domain-containing 1 protein-like
s2f_0010927001	2.1999	-1.4621	2.2234	0.050133	0.47799	-4.285	ASIP	agouti-signaling protein
s2f_0008159002	2.1878	-3.3831	3.3767	0.0069399	0.1974	-2.3913	B2M	beta-2-microglobulin
s2f_0000008031	2.1878	-2.1912	2.5724	0.027564	0.38363	-3.7227	LJ5G3V1602330.1	uncharacterized mitochondrial protein atmg00820-like
s2f_0000451008	-2.1711	1.43	-8.197	8.9016e-06	0.0055442	3.9966	SLC39A12	zinc transporter zip4
s2f_0000032022	2.1595	-3.2307	2.5158	0.030384	0.39546	-3.8151	ARF5	adp-ribosylation factor 2
s2f_0000016015	-2.1579	-2.1692	-2.0308	0.069422	0.53471	-4.5846	s2f_0000016015	tas retrotransposon peptidase a16
s2f_0019724001	-2.1569	-1.9667	-2.2994	0.044046	0.4569	-4.1645	s2f_0019724001	bone morphogenetic protein 2-like
s2f_0000149007	-2.1487	1.7429	-5.696	0.00019167	0.027816	1.1164	CBLN10	complement c1q-like protein 2
s2f_0088283001	2.1397	-1.4177	3.3141	0.0077165	0.20671	-2.4948	s2f_0088283001	nacht, lrr and pyd domains-containing protein 3-like
s2f_0000047014	2.1397	-3.6017	1.9022	0.086006	0.57773	-4.7784	s2f_0000047014	nacht, lrr and pyd domains-containing protein 3-like
s2f_0011280001	-2.1392	-3.7661	-1.8584	0.092453	0.59243	-4.8432	CTXND1	cortexin domain-containing 1
s2f_0008805055	2.1352	-2.9424	2.1893	0.053129	0.48744	-4.3388	s2f_0008805055	uncharacterized protein loc107567312
s2f_0018013001	2.1337	0.74234	5.5861	0.00022338	0.030917	0.96844	ODAM	gamma-gliadin
s2f_0016946001	-2.1265	-3.7934	-3.3481	0.0072835	0.20152	-2.4385	SI:RP71-45K5.2	forkhead box protein h1-like
s2f_0006398001	2.1225	-0.07063	3.2968	0.0079468	0.2105	-2.5234	ZSWIM7	zinc finger swim domain-containing protein 7
s2f_0012771001	2.119	-1.8299	4.1327	0.0019905	0.1054	-1.1677	GM28729	hypothetical protein
s2f_0174640001	-2.0982	-3.2921	-2.3368	0.041313	0.45022	-4.1046	s2f_0174640001	uncharacterized protein loc113077349
s2f_0017084001	2.0884	8.2434	7.6899	1.5636e-05	0.0068745	3.4832	TCNBA	transcobalamin-1-like
s2f_0052172001	-2.0854	-1.8921	-2.4741	0.032642	0.41037	-3.883	SI:CH211-146L10.7	ankyrin repeat domain-containing protein 17-like
s2f_0001307005	-2.069	1.1748	-5.446	0.00027224	0.035494	0.77684	MAMDC4	apical endosomal glycoprotein
s2f_0000273004	2.0642	-1.3894	2.9291	0.014906	0.28493	-3.1337	HCE2L1	high choriolytic enzyme 1-like
s2f_0088291001	2.063	-1.9859	3.4298	0.0063446	0.18892	-2.3038	s2f_0088291001	uncharacterized protein loc107595300
s2f_0019316001	2.063	-2.4521	2.7717	0.01955	0.32081	-3.3946	SI:BUSM1-52I16.2	claudin-10-like
s2f_0062380001	2.0597	1.7235	4.3275	0.0014594	0.08904	-0.86311	s2f_0062380001	protein fam133-like
s2f_0010480001	2.0559	-1.3296	2.5746	0.027457	0.38322	-3.719	SPATA48	spermatogenesis-associated protein 48
s2f_0045203001	2.0559	-2.7859	2.0312	0.069372	0.53471	-4.5839	s2f_0045203001	mucin-17-like
s2f_0001782006	2.0549	9.9416	8.6852	5.3038e-06	0.0041727	4.4609	GSTP1	glutathione s-transferase p
s2f_0000343031	-2.0505	-2.2364	-2.3936	0.037487	0.43237	-4.0134	s2f_0000343031	trace amine-associated receptor 13c-like
s2f_0068621001	-2.0494	-1.4065	-2.9105	0.01539	0.28973	-3.1645	ZGC:193807	putative golgin subfamily a member 6-like protein 19
s2f_0000004023	2.0491	7.2854	8.362	7.4529e-06	0.0050168	4.1567	CP2M1	cytochrome p450 2g1-like
s2f_0006979001	-2.0427	-3.8757	-3.8179	0.0033214	0.14145	-1.6701	SI:CH211-184M13.4	g-protein coupled receptor 183-like
s2f_0035575001	-2.0427	-3.906	-3.6245	0.0045763	0.16429	-1.9842	SI:CH211-214P13.7	uncharacterized protein si:ch211-214p13.7
s2f_0002217002	-2.0427	-2.8284	-3.011	0.012948	0.26521	-2.9976	RPS16	40s ribosomal protein s16
s2f_0000028037	-2.0427	-2.399	-2.8715	0.016461	0.29364	-3.2293	CI-PRD-A	intestine-specific homeobox-like
s2f_0517681001	2.0411	-2.1228	2.9188	0.015173	0.28746	-3.1508	s2f_0517681001	clumping factor b-like
s2f_0003222020	2.0387	-2.527	1.7825	0.10468	0.62413	-4.9536	s2f_0003222020	dual specificity protein kinase shkd-like
s2f_0003713003	2.026	-2.0455	3.0844	0.011418	0.25062	-2.8757	DCST1	e3 ubiquitin-protein ligase dcst1
s2f_0000424021	2.026	-3.3989	3.0684	0.011734	0.25458	-2.9023	CRYGS	beta-crystallin s isoform x1
s2f_0003346013	2.026	-2.108	2.6111	0.025784	0.37232	-3.6592	s2f_0003346013	uncharacterized protein loc106535646
s2f_0001712011	2.026	-3.3326	2.14	0.057751	0.50601	-4.4158	IL17C	interleukin-17c-like
s2f_0000016110	2.026	-3.5234	2.0923	0.062595	0.52256	-4.4899	s2f_0000016110	hypothetical protein
s2f_0000001154	-2.0223	3.0216	-7.9269	1.1977e-05	0.0062366	3.7272	F12	coagulation factor xii
s2f_0000050018	-2.0212	-0.49504	-1.5691	0.14737	0.68057	-5.2509	TAS1R3	taste receptor type 1 member 3
s2f_0000287014	-2.0188	0.33568	-1.7435	0.11154	0.63575	-5.0095	TBX20	t-box transcription factor tbx20
s2f_0002751004	-2.0177	0.14303	-1.6272	0.13443	0.66128	-5.1721	SGCZ	zeta-sarcoglycan-like
s2f_0020523001	-2.0144	-3.007	-2.3051	0.043613	0.45431	-4.1553	ACRV1	ubiquitin-like-specific protease 1
s2f_0005429002	2.0135	-1.3867	2.1654	0.055327	0.49761	-4.3763	APCDD1	protein apcdd1-like
s2f_0000278010	2.0104	-2.1258	3.161	0.010015	0.23501	-2.7485	POU1F1	pituitary-specific positive transcription factor 1
s2f_0023568001	1.9982	-0.72722	3.5915	0.0048356	0.16771	-2.0382	SI:DKEYP-61B2.1	tumor necrosis factor receptor superfamily member 21-like
s2f_0076734001	-1.9863	-2.2723	-1.7955	0.10248	0.62122	-4.9348	IL13	interleukin-13 precursor
s2f_0335921001	1.9862	0.36075	2.7768	0.019377	0.31922	-3.3861	s2f_0335921001	uncharacterized protein loc110439059
s2f_0195046001	-1.9774	-3.5837	-1.7662	0.10749	0.6275	-4.977	s2f_0195046001	uncharacterized protein loc117245648
s2f_0004946002	-1.9739	-3.0171	-2.7703	0.019595	0.32081	-3.3968	GM30500	multiple epidermal growth factor-like domains protein 6
s2f_0023891001	-1.9739	-2.0161	-2.6341	0.024783	0.36462	-3.6215	s2f_0023891001	hepacam family member 2-like
s2f_0024240001	-1.9738	-1.9365	-1.9072	0.08529	0.57637	-4.7709	SI:CH211-196F2.6	immunoglobulin domain-containing protein
s2f_0005243004	1.9654	-1.744	3.0346	0.012435	0.25982	-2.9584	ETV7	transcription factor etv7 isoform x1
s2f_0000021022	-1.9612	-3.1633	-2.409	0.03651	0.42928	-3.9886	BM2096	hypothetical protein
s2f_0000785006	-1.9585	-0.21428	-2.1896	0.053095	0.48744	-4.3382	NTRK1	high affinity nerve growth factor receptor
s2f_0282207001	1.9572	-3.9022	2.1646	0.055401	0.49768	-4.3775	s2f_0282207001	uncharacterized protein loc113066610 isoform x1
s2f_0019644001	-1.9462	-1.6931	-1.9814	0.075391	0.55138	-4.6595	s2f_0019644001	gastrin/cholecystokinin-like peptide
s2f_0004641002	1.9461	-2.2234	1.9075	0.085244	0.57637	-4.7705	ELOAL	elongin-a-like
s2f_0006424001	1.9422	-3.519	2.8317	0.017629	0.30358	-3.2953	OTOR	otoraplin
s2f_0023250001	1.9422	-3.9464	2.3599	0.03971	0.44133	-4.0675	IL21	interleukin-21
s2f_0000031024	1.9378	-0.97281	1.9616	0.077928	0.55815	-4.6895	FOXD5	forkhead box protein d3-like
s2f_0000216011	-1.9373	-1.8661	-2.9947	0.013316	0.26899	-3.0247	TLR7	toll-like receptor 7
s2f_0000277012	-1.9368	-2.8041	-2.6163	0.025556	0.37092	-3.6508	ZNF852	zinc finger protein 2 homolog
s2f_0000656017	-1.9368	-2.5573	-1.9908	0.074218	0.54927	-4.6453	OR62A1	olfactory receptor 5m3-like
s2f_0017518001	-1.9233	1.4654	-4.3421	0.0014261	0.088058	-0.84047	2010106E10RIK	proline-rich receptor-like protein kinase perk5
s2f_0000047048	-1.9218	-3.5097	-3.4693	0.005936	0.18522	-2.2387	s2f_0000047048	protein nlrc3-like
s2f_0166617001	-1.9218	-4.1701	-2.5667	0.027833	0.38488	-3.732	s2f_0166617001	gastrula zinc finger protein xlcgf57.1-like
s2f_0003411003	-1.9218	-3.2748	-2.1892	0.053134	0.48744	-4.3389	LJ0G3V0235939.1	oxysterol-binding protein-related protein 1c-like
s2f_0000121011	-1.9218	-3.1125	-2.0972	0.062087	0.52169	-4.4824	s2f_0000121011	--
s2f_0335836001	-1.9218	-2.6215	-2.0346	0.068972	0.5347	-4.5786	s2f_0335836001	keratin-associated protein 4-8-like
s2f_0000001051	1.9178	-2.1892	2.4467	0.034216	0.41814	-3.9274	GZMA	granzyme a-like
s2f_0000406005	1.9171	-1.3763	2.8231	0.01789	0.30634	-3.3094	TPO	thyroid peroxidase
s2f_0335934001	1.9149	0.35198	2.8212	0.017951	0.30634	-3.3127	SI:CH1073-340I21.3	uncharacterized protein loc570991
s2f_0000011039	-1.9085	-1.7418	-3.1544	0.010129	0.23547	-2.7595	PNCK	calcium/calmodulin-dependent protein kinase type 1b
s2f_0000656034	1.9052	-2.7418	3.1762	0.0097577	0.23152	-2.7232	s2f_0000656034	olfactory receptor 11a1-like
s2f_0000000136	1.9012	-0.18431	3.404	0.0066262	0.19383	-2.3462	s2f_0000000136	uncharacterized protein k02a2.6-like
s2f_0003457002	-1.9005	4.6961	-9.0411	3.6877e-06	0.0034453	4.782	PLB1	phospholipase b1, membrane-associated-like
s2f_0004400009	-1.8935	-2.4777	-2.0355	0.068874	0.5347	-4.5773	FBN2	(genbank) hypothetical protein
s2f_0001537001	-1.8845	-0.86623	-4.3857	0.0013315	0.08398	-0.77313	s2f_0001537001	disks large-associated protein 2-like
s2f_0101185001	-1.8809	-4.1804	-4.6379	0.00089965	0.068264	-0.38882	COL9A3	collagen alpha-3(ix) chain-like
s2f_0000278022	-1.8809	-3.7227	-4.5636	0.0010089	0.071539	-0.50107	POU3F4	pou domain, class 3, transcription factor 4
s2f_0000424026	-1.8809	-3.2502	-3.3763	0.0069441	0.1974	-2.3919	CRYGS3	gamma-crystallin m2-like
s2f_0002243013	-1.8809	-4.0483	-3.0555	0.011997	0.25697	-2.9238	s2f_0002243013	uncharacterized protein loc107656944
s2f_0000673062	-1.8809	-3.9869	-2.9071	0.015482	0.28987	-3.1702	s2f_0000673062	fc receptor-like protein 5
s2f_0000000071	-1.8809	-3.9464	-2.8	0.018618	0.31296	-3.3477	KRBA2	uncharacterized protein k02a2.6-like
s2f_0012849001	-1.8809	-2.7148	-1.8074	0.10052	0.61528	-4.9176	TEX49	testis-expressed protein 49
s2f_0131697001	1.8769	-2.3025	4.0698	0.0022028	0.11015	-1.2672	s2f_0131697001	dystonin-like
s2f_0004581002	1.8769	-2.1462	2.1926	0.052826	0.48744	-4.3335	SPDYA	speedy protein a
s2f_0000188009	1.8769	-2.648	1.9126	0.084534	0.5762	-4.7629	ALPHATUB84B	tubulin alpha-1 chain
s2f_0000520007	-1.8737	-0.11309	-2.3681	0.03916	0.43848	-4.0544	LGALS4	galectin-4
s2f_0000047022	1.8618	-1.6428	2.1143	0.060316	0.51623	-4.4558	RNH1	ribonuclease inhibitor
s2f_0006639006	1.8611	-1.4669	3.1666	0.00992	0.23315	-2.7393	s2f_0006639006	uncharacterized protein loc104955429
s2f_0007026003	1.8598	-1.8214	1.7366	0.11278	0.63736	-5.0192	SLAMF1	natural killer cell receptor 2b4-like
s2f_0000487003	1.8562	2.4594	6.8978	3.9897e-05	0.012391	2.6127	ZGC:113142	d-beta-hydroxybutyrate dehydrogenase, mitochondrial-like
s2f_0335937001	1.8548	2.8149	4.1243	0.0020176	0.1054	-1.181	s2f_0335937001	uncharacterized protein loc100002043
s2f_0000483008	1.8531	-1.9069	2.6999	0.022126	0.3456	-3.5132	PTX4	pentraxin-4
s2f_0000014020	-1.8454	-2.3991	-1.4747	0.17075	0.70686	-5.3754	MYO15B	hypothetical protein
s2f_0001307003	-1.8451	3.0329	-10.473	9.5242e-07	0.0017796	5.9402	SI:CH211-106H4.4	mam and ldl-receptor class a domain-containing protein 1-like
s2f_0031950001	-1.8439	-3.0613	-2.1248	0.059258	0.51172	-4.4395	GPR82	probable g-protein coupled receptor 82
s2f_0008168004	1.8437	-1.0256	3.0773	0.011556	0.25255	-2.8875	LFT1	left-right determination factor 2-like
s2f_0004372001	-1.8375	0.72898	-1.2928	0.22487	0.74332	-5.6008	TRIM67	tripartite motif-containing protein 67 isoform x1
s2f_0008615002	1.8365	-1.0138	2.3261	0.042078	0.45218	-4.1217	MREG	melanoregulin
s2f_0002393004	1.8331	1.894	5.9911	0.00012808	0.023592	1.5045	IFITM5	interferon-induced transmembrane protein 5-like
s2f_0335855001	-1.8314	1.4971	-4.9077	0.00059736	0.055119	0.011773	SI:CH73-306E8.2	uncharacterized protein si:ch73-306e8.2 isoform x1
s2f_0034494001	-1.8274	-2.404	-1.6855	0.12247	0.64962	-5.0913	SI:DKEYP-51F12.3	uncharacterized protein si:dkeyp-51f12.3
s2f_0036917001	-1.8253	-2.6619	-2.2011	0.052074	0.48432	-4.3202	SI:DKEY-183P4.10	dentin sialophosphoprotein-like
s2f_0000070023	-1.8225	-1.7067	-1.9118	0.084652	0.57625	-4.7642	DNAH9	hypothetical protein
s2f_0335851001	1.8213	-3.3255	3.2083	0.0092387	0.22638	-2.6701	s2f_0335851001	uncharacterized protein loc108179048
s2f_0001745001	1.8213	-2.5632	2.4883	0.031858	0.4056	-3.86	HMG1	hypothetical protein
s2f_0001219008	-1.8162	1.0991	-1.3197	0.21607	0.73924	-5.5688	HSPA12A	heat shock 70 kda protein 12a isoform x1
s2f_0037593001	1.8123	-1.555	2.3962	0.037318	0.43142	-4.0091	SI:DKEY-58I8.5	serine/threonine-protein kinase pim-2-like
s2f_0000852008	-1.812	-3.3195	-2.7072	0.021849	0.34451	-3.5011	IFNC2	interferon beta-like
s2f_0020917001	-1.8049	-2.3073	-2.0028	0.072754	0.54538	-4.6272	s2f_0020917001	btb/poz domain-containing protein kctd16-like
s2f_0009625003	-1.8027	5.7729	-10.591	8.5787e-07	0.0017796	6.0269	SI:DKEY-205H13.2	uncharacterized protein si:dkey-205h13.2
s2f_0189453001	1.793	-2.5665	2.5572	0.028295	0.38803	-3.7476	s2f_0189453001	suppressor protein srp40-like
s2f_0023572001	1.7917	3.3871	5.894	0.00014605	0.023822	1.3783	SCPP5	secretory calcium-binding phosphoprotein 5
s2f_0006136001	1.7843	-1.516	2.4479	0.034145	0.41768	-3.9255	RNF43	e3 ubiquitin-protein ligase rnf43
s2f_0105652001	1.7804	-4.0483	4.6567	0.00087403	0.067879	-0.36052	s2f_0105652001	calsenilin-like
s2f_0020608001	1.7804	-2.9858	2.9003	0.015664	0.29022	-3.1815	SI:DKEYP-75H12.7	uncharacterized protein si:dkeyp-75h12.7
s2f_0002580003	1.7804	-3.8143	1.7684	0.10711	0.62739	-4.9739	BMA-SAM-10	hypothetical protein
s2f_0001208006	-1.7774	3.4655	-9.5217	2.2982e-06	0.0031231	5.1937	FADS2	fatty acid desaturase 2
s2f_0017149001	-1.7713	6.2717	-6.4131	7.3447e-05	0.017154	2.0359	AFP4	type-4 ice-structuring protein ls-12-like
s2f_0019612001	-1.7704	0.92207	-8.4803	6.5722e-06	0.0046782	4.2695	SI:DKEY-30C15.13	uncharacterized protein si:dkey-30c15.13
s2f_0000901009	-1.7697	1.4852	-6.9238	3.8644e-05	0.012347	2.6427	SLC5A9	sodium/glucose cotransporter 4
s2f_0005442004	-1.7681	5.1151	-11.971	2.7063e-07	0.0010113	6.9552	SI:CH211-229D2.5	zona pellucida-like domain-containing protein 1
s2f_0011073001	-1.7674	-1.8964	-1.5114	0.16131	0.69618	-5.3276	SPP2	secreted phosphoprotein 24
s2f_0005433002	1.7621	-1.0369	7.8359	1.3258e-05	0.006393	3.6344	CG4329	hypothetical protein
s2f_0003047026	-1.76	-2.8157	-3.5131	0.0055141	0.1765	-2.1667	s2f_0003047026	slam family member 9-like
s2f_0000529014	-1.76	-3.4888	-2.7541	0.02015	0.32651	-3.4236	ADMP	bone morphogenetic protein 2-like
s2f_0001222005	-1.76	-2.369	-2.3527	0.040202	0.44254	-4.079	TCTEX1D4	tctex1 domain-containing protein 4
s2f_0335835001	-1.76	-4.1492	-2.2094	0.051346	0.48134	-4.3072	WU:FK95D07	uncharacterized protein wu:fk95d07
s2f_0001490005	-1.76	-3.5594	-2.0624	0.065833	0.52775	-4.5361	TCF/LEF	hypothetical protein
s2f_0000090002	-1.76	-3.0785	-2.0229	0.070346	0.53767	-4.5966	CYP11	peptidyl-prolyl cis-trans isomerase-like
s2f_0009760007	1.7521	-3.0986	1.7829	0.10462	0.62413	-4.9531	s2f_0009760007	g2/m phase-specific e3 ubiquitin-protein ligase-like
s2f_0000127032	-1.7467	-1.7618	-2.2405	0.048697	0.47077	-4.258	SI:DKEY-37G12.1	atrial natriuretic peptide receptor 1-like
s2f_0000261004	-1.7454	-0.90649	-6.49	6.6543e-05	0.016043	2.1296	SLC2A5	solute carrier family 2, facilitated glucose transporter member 5
s2f_0000149004	1.7449	-1.1773	3.5186	0.005463	0.17628	-2.1575	C1QA	complement c1q subcomponent subunit a
s2f_0002262003	-1.7385	1.4806	-4.7628	0.00074332	0.061786	-0.20195	MASP2	mannan-binding lectin serine protease 2
s2f_0009889002	-1.7317	-2.0584	-2.3674	0.039208	0.43868	-4.0555	VRTN	vertnin
s2f_0002367010	-1.7317	-1.9291	-2.0518	0.067019	0.53052	-4.5524	NXPH4	neurexophilin-2-like
s2f_0006026002	-1.7317	-3.526	-1.8578	0.092542	0.59243	-4.8441	PHF11	hypothetical protein
s2f_0000343027	-1.7317	-3.8921	-1.7962	0.10238	0.62122	-4.9339	TAAR11	trace amine-associated receptor 1-like
s2f_0002514003	-1.7224	-2.1583	-1.4906	0.1666	0.70375	-5.3548	SAMHD1	deoxynucleoside triphosphate triphosphohydrolase samhd1-like
s2f_0051458001	-1.7191	-3.2338	-1.6742	0.12472	0.64967	-5.1072	s2f_0051458001	claudin-1-like
s2f_0000086021	1.7151	-1.1326	3.4324	0.0063165	0.18846	-2.2994	FKBP6	inactive peptidyl-prolyl cis-trans isomerase fkbp6
s2f_0009626005	1.7116	-2.4995	2.4126	0.036283	0.428	-3.9827	ZP3F.2	zona pellucida sperm-binding protein 3-like
s2f_0010372001	1.7116	-2.5535	1.8992	0.086436	0.57773	-4.7829	LAG3	lymphocyte activation gene 3 protein
s2f_0000051072	-1.7055	-0.53011	-1.4688	0.17231	0.70686	-5.383	PCDH2AA1	protocadherin alpha-8-like
s2f_0003124004	-1.7047	-1.1627	-1.5418	0.15383	0.6876	-5.2874	GPR6	g-protein coupled receptor 6
s2f_0001291002	1.7033	-0.71432	3.6611	0.0043055	0.1601	-1.9245	CYP39A1	24-hydroxycholesterol 7-alpha-hydroxylase isoform x1
s2f_0000092026	-1.6977	1.534	-4.7519	0.00075568	0.061786	-0.2181	SULT5A1	sulfotransferase family cytosolic 2b member 1-like
s2f_0012446001	1.6917	-0.53356	2.1715	0.054754	0.49514	-4.3667	s2f_0012446001	--
s2f_0020203001	1.6914	-1.6988	1.8759	0.089827	0.58814	-4.8174	SI:CH211-57I17.5	usherin-like
s2f_0010793001	-1.6836	-2.2315	-2.0454	0.067741	0.53238	-4.5622	MMP21	matrix metalloproteinase-21
s2f_0000099020	1.6833	-1.7821	2.2684	0.046432	0.46593	-4.2137	HIST1H2BA	histone h2b type 1-a
s2f_0005690001	-1.6833	-0.88832	-2.019	0.070806	0.5391	-4.6025	SKAP1	src kinase-associated phosphoprotein 1
s2f_0010155001	-1.6829	-0.78771	-2.667	0.023418	0.35599	-3.5674	UBXN10	ubx domain-containing protein 10
s2f_0032942001	-1.6727	0.20378	-3.696	0.0040627	0.15531	-1.8676	s2f_0032942001	gtpase imap family member 4-like
s2f_0000257001	-1.6715	-1.1237	-1.88	0.089219	0.58665	-4.8114	DSIM_GD12682	mical-like protein 1 isoform x1
s2f_0018278001	-1.6651	-1.3929	-2.8164	0.018099	0.30778	-3.3206	SI:CH211-170D8.2	uncharacterized protein si:ch211-170d8.2
s2f_0000206029	1.6595	-2.9897	2.5367	0.029311	0.39114	-3.7811	CLD3	claudin-4-like
s2f_0335881001	1.6595	-4.2106	2.3773	0.038544	0.43701	-4.0395	s2f_0335881001	uncharacterized protein loc110438376
s2f_0009165010	1.6595	-3.6208	2.1517	0.05662	0.50278	-4.3976	s2f_0009165010	alpha-tectorin-like
s2f_0000016098	1.6595	-3.0613	1.9802	0.075545	0.55164	-4.6614	BM18050	--
s2f_0038849001	1.6595	-3.5804	1.6687	0.12582	0.65045	-5.1148	SI:CH211-280C16.1	gtpase imap family member 7-like
s2f_0335940001	-1.6585	0.92135	-4.6587	0.00087134	0.067879	-0.3575	SI:DKEY-86L18.10	uncharacterized protein loc100535291 precursor
s2f_0000050033	-1.6569	-2.0149	-1.348	0.20709	0.73397	-5.5345	OLFCR1	extracellular calcium-sensing receptor-like
s2f_0001251002	-1.6553	4.4289	-4.127	0.0020088	0.1054	-1.1767	C4B	complement c4-like
s2f_0000277010	-1.6502	-1.9698	-2.3334	0.041556	0.451	-4.1101	s2f_0000277010	gastrula zinc finger protein xlcgf57.1-like
s2f_0000135002	1.6484	-2.6561	2.1211	0.059634	0.51349	-4.4454	TRI11	e3 ubiquitin/isg15 ligase trim25-like
s2f_0057174001	1.6474	1.1015	3.5865	0.0048758	0.16832	-2.0463	s2f_0057174001	(genbank) unnamed protein product
s2f_0004543003	-1.646	1.1178	-1.9207	0.083406	0.57349	-4.7508	SYNDIG1L	synapse differentiation-inducing gene protein 1-like
s2f_0003107001	-1.6363	2.3876	-6.8832	4.0619e-05	0.012391	2.5959	SC5D	lathosterol oxidase
s2f_0008805037	-1.6352	-2.7024	-2.3695	0.039066	0.43814	-4.0521	s2f_0008805037	uncharacterized protein loc101882211 isoform x1
s2f_0008805022	-1.6352	-3.4888	-2	0.073096	0.54577	-4.6315	s2f_0008805022	uncharacterized protein loc113078550 isoform x1
s2f_0003907001	-1.6352	-3.7934	-1.9507	0.079356	0.56374	-4.7059	UBAP2	ubiquitin-associated protein 2 isoform x1
s2f_0001100003	-1.6352	-2.2548	-1.9075	0.08525	0.57637	-4.7705	HDAC11	(genbank) hypothetical protein
s2f_0039695001	-1.6352	-3.0938	-1.8149	0.099285	0.61122	-4.9067	s2f_0039695001	probable histone acetyltransferase hac-like 3
s2f_0004661002	-1.6352	-3.3739	-1.5399	0.1543	0.68808	-5.29	GPR65	psychosine receptor-like
s2f_0001912008	1.6312	-1.5455	1.8525	0.093349	0.59551	-4.8518	SH2D7	sh2 domain-containing protein 7
s2f_0005442006	-1.6291	5.2777	-9.108	3.4486e-06	0.0034367	4.8408	SI:CH73-261I21.5	zona pellucida-like domain-containing protein 1
s2f_0004258003	1.6283	-1.3096	1.2474	0.2404	0.7511	-5.6538	NAT1	arylamine n-acetyltransferase, pineal gland isozyme nat-10-like
s2f_0000231023	1.6232	-2.4292	1.6796	0.12364	0.64967	-5.0996	HES3	transcription factor hes-3
s2f_0000046028	1.6225	-2.9456	1.683	0.12296	0.64962	-5.0948	s2f_0000046028	d(1) dopamine receptor-like
s2f_0000521010	-1.6205	-0.37323	-1.4629	0.1739	0.70849	-5.3906	ZGC:194221	protein alp1-like
s2f_0005457001	1.6131	6.1952	6.7927	4.543e-05	0.013582	2.4906	SQOR	sulfide:quinone oxidoreductase, mitochondrial
s2f_0040077001	1.6114	-2.0771	1.733	0.11345	0.63796	-5.0245	ZMP:0000001006	hereditary hemochromatosis protein homolog
s2f_0138527001	-1.6109	-2.7892	-1.3382	0.21016	0.736	-5.5464	SI:CH211-127N13.2	coiled-coil domain-containing protein 106-like
s2f_0000273020	-1.6069	4.0671	-4.7718	0.00073325	0.061672	-0.18862	MEP1B	meprin a subunit beta
s2f_0000885009	1.6069	-2.4918	2.2168	0.050701	0.47932	-4.2954	MLNR	motilin receptor
s2f_0006273001	-1.6057	2.9464	-5.6366	0.00020816	0.029835	1.0367	FNDC7A	fibronectin type iii domain-containing protein 7-like
s2f_0166431001	-1.6057	-1.9483	-1.8164	0.099039	0.61122	-4.9045	SI:CH211-155M12.1	formin-like protein 3
s2f_0001893005	-1.6023	2.6385	-1.6905	0.1215	0.64864	-5.0844	NFIX	nuclear factor 1 x-type-like isoform x1
s2f_0015346001	1.6022	-0.54986	1.6934	0.12093	0.64847	-5.0803	IL11A	interleukin-11-like
s2f_0005566002	-1.5987	-0.49216	-1.4411	0.1798	0.71512	-5.4184	STARD5	star-related lipid transfer protein 5
s2f_0002710004	-1.5982	-2.4787	-3.467	0.005959	0.18522	-2.2425	IGF3	insulin-like growth factor i
s2f_0001065001	-1.5982	-3.7227	-2.5343	0.029431	0.39114	-3.7849	SI:CH211-212K18.13	ubiquitin carboxyl-terminal hydrolase 47-like
s2f_0003345006	-1.5982	-4.251	-2.496	0.031438	0.40325	-3.8474	s2f_0003345006	c2 calcium-dependent domain-containing protein 4c-like
s2f_0015996001	-1.5982	-3.6208	-2.135	0.05825	0.50801	-4.4238	CCDC195	putative coiled-coil domain-containing protein 195
s2f_0285715001	-1.5982	-4.0171	-1.9672	0.077197	0.55641	-4.681	s2f_0285715001	golgi-specific brefeldin a-resistance guanine nucleotide exchange factor 1-like
s2f_0004859001	-1.5982	-3.3567	-1.966	0.077361	0.55696	-4.6829	CTXN2	cortexin-2
s2f_0007396005	-1.5982	-2.6209	-1.9626	0.077802	0.55752	-4.6881	SIRPD	--
s2f_0000944009	-1.5982	-3.6705	-1.9062	0.085438	0.57637	-4.7725	s2f_0000944009	zinc finger protein 239-like
s2f_0000231021	-1.5982	-3.7934	-1.6269	0.13451	0.66128	-5.1726	BM699	hypothetical protein
s2f_0005896004	-1.596	1.5845	-1.6996	0.11973	0.64728	-5.0716	CNR1	cannabinoid receptor 1
s2f_0008529002	-1.5955	-0.86143	-1.3917	0.19389	0.72831	-5.4807	s2f_0008529002	hypothetical protein
s2f_0057075001	1.5942	-2.9051	1.7214	0.11559	0.64111	-5.0408	SI:CH211-286B5.2	uncharacterized protein loc107594322
s2f_0011074001	1.5907	-2.3223	2.3661	0.03929	0.43894	-4.0575	IZUMO1	izumo sperm-egg fusion protein 1
s2f_0001125005	1.5907	-3.3032	2.2786	0.045631	0.46326	-4.1975	P2RX4B	p2x purinoceptor 4-like
s2f_0004400019	1.5907	-2.6894	1.838	0.0956	0.6031	-4.8731	s2f_0004400019	vegetative cell wall protein gp1-like isoform x1
s2f_0002304002	1.5907	-3.2418	1.7796	0.10518	0.62417	-4.9578	TPT1	translationally-controlled tumor protein
s2f_0000424007	1.5907	-3.1701	1.741	0.11199	0.63729	-5.0131	CRYGM4	gamma-crystallin m3-like
s2f_0000052025	-1.5881	1.4354	-2.6705	0.023274	0.35572	-3.5615	SERPING1	plasma protease c1 inhibitor
s2f_0000047039	1.588	0.71392	4.1101	0.0020642	0.10603	-1.2034	DRC7	nlr family card domain-containing protein 3-like
s2f_0000149047	-1.5846	4.222	-6.7023	5.085e-05	0.014617	2.3843	CBLN18	complement c1q-like protein 4
s2f_0000004012	1.5837	7.0901	7.9113	1.2186e-05	0.0062366	3.7114	CYP1A1	cytochrome p450 1a1
s2f_0014978001	-1.5826	-1.9154	-2.0662	0.065413	0.52668	-4.5302	s2f_0014978001	(genbank) hypothetical protein
s2f_0000673060	1.5823	0.50709	6.2872	8.6487e-05	0.018736	1.8802	SI:CH211-163C2.2	sialoadhesin-like
s2f_0001135002	1.5823	4.9953	6.1626	0.00010189	0.020307	1.7237	TRPV6	transient receptor potential cation channel subfamily v member 6
s2f_0002344001	1.5809	4.5005	5.8923	0.00014639	0.023822	1.3761	TSTD1	thiosulfate:glutathione sulfurtransferase
s2f_0001047002	1.578	5.7711	7.7813	1.4099e-05	0.0065858	3.5782	GSR	glutathione reductase, mitochondrial
s2f_0009946001	-1.574	3.4789	-8.3292	7.7191e-06	0.0050168	4.1252	SI:CH211-153B23.3	putative threonylcarbamoyl-amp synthase
s2f_0000280011	-1.5725	3.2631	-9.1698	3.2429e-06	0.0034367	4.8946	ELOVL5	elongation of very long chain fatty acids protein 5
s2f_0004135006	-1.5705	-0.16094	-1.9544	0.07887	0.56274	-4.7004	ANKRD34C	ankyrin repeat domain-containing protein 34c
s2f_0000197001	-1.5699	-2.8405	-1.6522	0.12917	0.65551	-5.1376	CPLA	hypothetical protein
s2f_0000424008	-1.5664	-2.7841	-1.6744	0.12468	0.64967	-5.1069	SI:DKEY-57A22.14	gamma-crystallin m2-like
s2f_0000121035	1.563	-2.9665	1.9332	0.081693	0.5701	-4.7321	s2f_0000121035	putative scan domain-containing protein scand2p
s2f_0006005041	-1.5613	-2.0706	-2.3275	0.04198	0.45218	-4.1196	s2f_0006005041	gastrula zinc finger protein xlcgf8.2db-like
s2f_0018271001	1.5594	5.7163	4.4859	0.0011382	0.076641	-0.61934	HSPB9	heat shock protein 30-like
s2f_0004079004	1.5579	-2.1344	1.7663	0.10748	0.6275	-4.9769	CFAP73	coiled-coil domain-containing protein 42 homolog
s2f_0104208001	1.5479	7.2861	8.778	4.8187e-06	0.0040017	4.546	SI:DKEY-9L20.3	uncharacterized protein loc109085181
s2f_0006836002	-1.5466	-1.0681	-1.9077	0.085228	0.57637	-4.7703	RBM45	rna-binding protein 45
s2f_0038848001	-1.5458	-1.1466	-2.0747	0.06448	0.52354	-4.5171	s2f_0038848001	uncharacterized protein loc101884626
s2f_0003063008	1.5387	-2.6037	2.3953	0.037377	0.43144	-4.0106	SI:CH211-231M23.4	free fatty acid receptor 2-like
s2f_0006583006	-1.5367	3.0783	-6.2421	9.1751e-05	0.019129	1.8238	ITLN2	intelectin-like
s2f_0000061022	1.5347	-3.9162	2.644	0.024363	0.36022	-3.6052	DDX46	probable atp-dependent rna helicase ddx46
s2f_0003222012	1.5347	-3.9776	2.5978	0.026385	0.37455	-3.6811	s2f_0003222012	obscurin-like
s2f_0000024026	1.5347	-4.1399	2.4774	0.032459	0.4091	-3.8776	LJ0G3V0159869.1	uncharacterized mitochondrial protein atmg00310-like
s2f_0001113002	1.5347	-3.7135	2.4073	0.036612	0.42928	-3.9912	BMA-DAF-31	n-alpha-acetyltransferase 10
s2f_0020331001	1.5347	-2.4929	2.0875	0.06311	0.52256	-4.4974	SI:DKEY-29H14.10	uncharacterized protein si:dkey-29h14.10
s2f_0282228001	1.5347	-3.4958	2.0853	0.063344	0.52256	-4.5008	s2f_0282228001	gastrula zinc finger protein xlcgf57.1-like
s2f_0000640008	1.5347	-4.2418	2.0386	0.068512	0.5347	-4.5725	17.M07874	hypothetical protein
s2f_0007670004	1.5347	-3.3255	1.7756	0.10587	0.62448	-4.9636	BEND5	ben domain-containing protein 5-like
s2f_0000252009	1.5347	-3.3659	1.5254	0.15782	0.69262	-5.3091	GLC7	hypothetical protein
s2f_0044951001	-1.5336	-2.2287	-2.5178	0.030282	0.39524	-3.812	s2f_0044951001	histone h2b.1, sperm-like
s2f_0006066004	-1.5294	-2.5464	-1.7659	0.10755	0.6275	-4.9775	SI:CH73-40I7.2	fyn-binding protein 1
s2f_0000278014	-1.5294	-2.52	-1.4993	0.16437	0.70159	-5.3434	POU3F1	hypothetical protein
s2f_0011381001	-1.527	-2.3588	-1.8518	0.093462	0.59551	-4.8529	MCIDAS	multicilin
s2f_0000511008	-1.5263	0.45922	-5.0908	0.0004551	0.047862	0.27721	GATA1	erythroid transcription factor
s2f_0019958001	-1.5254	-2.4785	-1.8748	0.089982	0.58838	-4.819	SPA17	(genbank) unnamed protein product
s2f_0000047061	-1.5239	-1.1902	-2.2053	0.051698	0.48269	-4.3135	s2f_0000047061	protein nlrc3-like
s2f_0335892001	-1.5144	-4.272	-2.5812	0.027147	0.38102	-3.7082	s2f_0335892001	uncharacterized protein loc110439350
s2f_0008857010	-1.5144	-2.7871	-2.5428	0.029006	0.39066	-3.7711	s2f_0008857010	hypothetical protein
s2f_0001658006	-1.5144	-3.9464	-2.1804	0.05393	0.49096	-4.3526	RHCG	ammonium transporter rh type c
s2f_0002252007	-1.5144	-4.0785	-2.1005	0.061744	0.5209	-4.4773	SZL	secreted frizzled-related protein 2-like
s2f_0000980010	-1.5144	-3.885	-1.9385	0.080981	0.56763	-4.7242	SYMBB.V1.2.019924.T1	hypothetical protein
s2f_0002121008	-1.5144	-4.2106	-1.9214	0.083314	0.57311	-4.7498	ZNF516	zinc finger protein 516
s2f_0000050022	-1.5144	-1.6604	-1.9014	0.08612	0.57773	-4.7796	V2RA16	extracellular calcium-sensing receptor-like
s2f_0000224007	-1.5144	-3.906	-1.6563	0.12834	0.65452	-5.132	RPP40	rna-directed dna polymerase from mobile element jockey-like
s2f_0005152003	-1.5144	-2.5795	-1.5168	0.15996	0.69514	-5.3205	s2f_0005152003	protein rolling stone-like
s2f_0002262007	-1.5144	-3.8041	-1.5103	0.16159	0.69627	-5.329	C1R	complement c1r-a subcomponent-like
s2f_0000059032	-1.5144	-3.6823	-1.469	0.17226	0.70686	-5.3828	s2f_0000059032	cd209 antigen-like protein d
s2f_0000149012	-1.5137	-2.2261	-4.6663	0.00086119	0.067879	-0.34603	C1QB	complement c1q subcomponent subunit b-like
s2f_0001114004	1.5121	2.1599	7.8873	1.2517e-05	0.0062366	3.687	SI:CH73-170D6.2	neoverrucotoxin subunit alpha-like
s2f_0000028042	-1.5072	-1.3796	-3.9797	0.0025489	0.12134	-1.4104	MIXL1	homeobox protein mixl1
s2f_0007447003	-1.5017	-1.7074	-2.0552	0.066628	0.52948	-4.5471	FAM81B	protein fam81b
s2f_0002843004	-1.4994	2.4785	-4.9963	0.00052336	0.051997	0.14091	NR5A5	nuclear receptor subfamily 5 group a member 2-like
s2f_0402953001	1.4977	-3.8548	2.9713	0.013862	0.27372	-3.0635	s2f_0402953001	collagen alpha-1(ix) chain-like
s2f_0000059048	1.4977	-4.251	2.8147	0.018153	0.30795	-3.3235	s2f_0000059048	cd209 antigen-like protein e
s2f_0000374011	1.4977	-4.1189	2.3521	0.040246	0.44254	-4.0801	COL11A1	collagen alpha-1(xi) chain isoform x1
s2f_0022182001	1.4977	-3.5292	2.2805	0.045485	0.46326	-4.1945	s2f_0022182001	(genbank) unnamed protein product
s2f_0010310001	1.4977	-2.9687	1.8608	0.09209	0.59223	-4.8397	DCSTAMP	dendritic cell-specific transmembrane protein
s2f_0077055001	1.4977	-1.8739	1.7456	0.11116	0.63575	-5.0065	s2f_0077055001	myb-related transcription factor, partner of profilin-like
s2f_0002235003	1.4977	-3.6705	1.7358	0.11294	0.63778	-5.0205	ATP1	hypothetical protein
s2f_0000023023	1.4977	-3.5906	1.6458	0.13051	0.65824	-5.1466	s2f_0000023023	nuclear factor 7, brain-like
s2f_0007394004	-1.4958	7.8513	-8.0684	1.0242e-05	0.006124	3.8695	SI:CH211-284E20.8	fetuin-b-like
s2f_0285855001	1.4942	-2.634	1.3182	0.21654	0.73924	-5.5705	s2f_0285855001	uncharacterized protein loc109110813
s2f_0000768004	-1.493	2.6317	-5.3964	0.00029216	0.0367	0.70832	SDSL	serine dehydratase-like
s2f_0335941001	-1.4928	-1.7491	-1.6468	0.13031	0.6578	-5.1452	SI:DKEY-112A7.5	uncharacterized protein loc100536854 precursor
s2f_0001477004	1.4866	-2.3018	3.4523	0.0061082	0.18672	-2.2667	RPL10	60s ribosomal protein l10
s2f_0000005012	-1.4861	-2.8656	-1.6922	0.12117	0.64864	-5.082	41.T00023	hypothetical protein
s2f_0000872010	1.4847	6.7261	7.0819	3.1882e-05	0.011347	2.8229	LALBA	lysozyme c, milk isozyme-like
s2f_0000092021	-1.4839	4.378	-7.1617	2.8968e-05	0.010561	2.9124	SULT3ST1	amine sulfotransferase-like
s2f_0003163001	-1.4794	1.3964	-4.2466	0.0016592	0.095392	-0.98903	EBI3	interleukin-27 subunit beta
s2f_0008832001	-1.4794	1.1749	-4.1297	0.0020003	0.1054	-1.1725	LEAP2	liver-expressed antimicrobial peptide 2-like
s2f_0005463003	-1.4773	2.1528	-4.6024	0.00095005	0.069872	-0.44221	PRG4B	proteoglycan 4-like isoform x1
s2f_0010484001	-1.4773	-3.6915	-2.5404	0.029124	0.39078	-3.775	THAP9	dna transposase thap9 isoform x1
s2f_0003346008	1.4763	-0.56787	4.8863	0.0006168	0.056564	-0.019522	SI:DKEY-49O11.1	(genbank) hypothetical protein
s2f_0000081012	1.4746	4.7049	4.8732	0.0006291	0.056649	-0.038811	CRISP2	cysteine-rich venom protein-like
s2f_0013056001	-1.4741	-0.90047	-1.8973	0.086703	0.57798	-4.7857	CCDC190	coiled-coil domain-containing protein 190
s2f_0003603007	-1.4734	-1.1387	-3.0868	0.011371	0.24995	-2.8717	EDN2	endothelin-2-like
s2f_0000021023	-1.4734	-2.4313	-1.6524	0.12915	0.65551	-5.1374	PTPRF	receptor-type tyrosine-protein phosphatase f isoform x1
s2f_0000571007	-1.4734	-2.4382	-1.6017	0.13999	0.66829	-5.207	TRPM1	transient receptor potential cation channel subfamily m member 1
s2f_0000656012	-1.4734	-3.1391	-1.4619	0.17417	0.709	-5.3919	MOR120-1	olfactory receptor 52e4-like
s2f_0000001033	-1.4719	3.1749	-9.566	2.2025e-06	0.0031231	5.2303	SI:DKEY-33M11.8	trypsin-like
s2f_0018391001	1.4694	-3.0372	2.6509	0.024074	0.35917	-3.5938	G6FL	g6f-like isoform x1
s2f_0008027004	1.4689	-0.23124	3.1207	0.010729	0.24262	-2.8154	s2f_0008027004	uncharacterized loc106564862
s2f_0000070030	-1.4662	-1.492	-1.8629	0.091772	0.59212	-4.8366	DNHD1	dynein heavy chain domain-containing protein 1
s2f_0007545003	-1.4652	-0.55245	-4.1849	0.0018308	0.101	-1.0856	NMS	neuromedin-s
s2f_0007316001	-1.4648	-1.8168	-2.7473	0.020387	0.32874	-3.4348	IL12B	interleukin-12 subunit beta-like
s2f_0000047053	-1.4604	-0.070831	-1.4474	0.17809	0.71332	-5.4105	s2f_0000047053	nacht, lrr and pyd domains-containing protein 12-like
s2f_0000149023	-1.4595	-0.62684	-1.3912	0.19403	0.72831	-5.4813	C1QL2	complement c1q-like protein 2
s2f_0000059040	1.4542	0.42572	2.4922	0.031641	0.40391	-3.8535	SI:CH73-343L4.2	cd209 antigen-like
s2f_0189455001	-1.449	-3.4344	-1.565	0.14834	0.68057	-5.2565	s2f_0189455001	muscle m-line assembly protein unc-89-like
s2f_0000293014	1.4468	3.7916	6.4358	7.1336e-05	0.016926	2.0636	CBR-CLEC-180	galactose-specific lectin nattectin-like
s2f_0188695001	-1.4455	-2.9152	-1.5027	0.16351	0.69992	-5.339	s2f_0188695001	(genbank) hypothetical protein
s2f_0000964004	1.4429	5.595	7.9207	1.2058e-05	0.0062366	3.721	AIFM3	apoptosis-inducing factor 3 isoform x1
s2f_0000034018	1.4392	7.8686	7.9507	1.1663e-05	0.0062366	3.7514	ABCC2	canalicular multispecific organic anion transporter 1
s2f_0000089010	1.4382	-2.5401	1.8616	0.091956	0.59223	-4.8384	OR30BT3	olfactory receptor 2at4-like
s2f_0017418001	1.4375	-3.0253	1.3122	0.21847	0.73935	-5.5777	s2f_0017418001	zinc finger protein 664-like
s2f_0007328001	-1.4372	-0.78648	-3.593	0.0048238	0.16771	-2.0358	CD28	cytotoxic t-lymphocyte protein 4-like
s2f_0006973001	1.4363	-0.26316	2.1626	0.055583	0.49793	-4.3805	VHLL	von hippel-lindau disease tumor suppressor-like
s2f_0003985004	1.4345	-2.3385	1.3363	0.21076	0.73616	-5.5487	SPIC	transcription factor spi-c-like
s2f_0006600003	1.4345	-1.5996	1.2976	0.22326	0.74259	-5.595	ZBTB20	zinc finger and btb domain-containing protein 20
s2f_0006179004	-1.4344	-0.40279	-2.604	0.026102	0.37408	-3.6709	LY6M6	urokinase plasminogen activator surface receptor-like
s2f_0006821001	-1.434	-2.4959	-1.3592	0.20365	0.73166	-5.5209	AMZ2	archaemetzincin-2 isoform x1
s2f_0051471001	-1.4335	-0.96881	-1.7458	0.11112	0.63575	-5.0063	s2f_0051471001	zinc finger protein 271-like
s2f_0010474001	-1.4333	-0.79244	-3.0775	0.011554	0.25255	-2.8872	GMNC	geminin coiled-coil domain-containing protein 1
s2f_0000075023	-1.4294	-0.97452	-2.7131	0.021626	0.34208	-3.4913	CHRNA5	5-hydroxytryptamine receptor 3a-like
s2f_0001678003	-1.4293	0.67111	-3.4253	0.0063924	0.18959	-2.3111	IRGC	interferon-inducible gtpase 5-like
s2f_0000054014	-1.429	-0.32444	-1.323	0.21501	0.73924	-5.5648	PPM1F	protein phosphatase 1f
s2f_0003958003	1.4289	-3.5766	1.3235	0.21484	0.73924	-5.5642	EYS	fibropellin-1-like
s2f_0021741001	1.4206	-1.9487	2.7206	0.02135	0.33879	-3.479	s2f_0021741001	uncharacterized loc105844902
s2f_0022396001	1.4192	-1.4727	1.5761	0.14576	0.6773	-5.2416	SI:CH73-170D6.3	tyrosine-protein kinase-like otk
s2f_0000742001	-1.4179	4.5844	-5.9062	0.00014365	0.023822	1.3943	MSMO1	methylsterol monooxygenase 1
s2f_0009302002	1.4141	-0.21247	2.4027	0.036901	0.42993	-3.9986	SPATA22	spermatogenesis-associated protein 22-like
s2f_0008805032	1.4139	-3.9464	2.9896	0.013434	0.26966	-3.0332	s2f_0008805032	carcinoembryonic antigen-related cell adhesion molecule 1-like isoform x1
s2f_0000023040	1.4139	-4.272	2.3238	0.042245	0.45218	-4.1255	s2f_0000023040	e3 ubiquitin-protein ligase trim39-like
s2f_0000753031	1.4139	-3.5502	2.2515	0.047796	0.4688	-4.2406	s2f_0000753031	c-type mannose receptor 2-like
s2f_0030807001	1.4139	-4.272	2.2354	0.04912	0.47188	-4.266	s2f_0030807001	collagen alpha-1(xvii) chain-like
s2f_0017276001	1.4139	-4.1399	2.0657	0.06547	0.52672	-4.531	IL27	cardiotrophin-2-like
s2f_0000000103	1.4139	-3.9464	2.0646	0.065586	0.52694	-4.5326	LJ0G3V0290049.1	uncharacterized protein k02a2.6-like
s2f_0000863020	1.4139	-4.272	1.9949	0.073711	0.54682	-4.6391	NITR14A	novel immune-type receptor 14a precursor
s2f_0000130002	1.4139	-3.286	1.9649	0.077502	0.55696	-4.6846	PGA5	pepsin a-like
s2f_0000050051	1.4139	-4.0785	1.9157	0.084106	0.57565	-4.7584	GRM8	metabotropic glutamate receptor 8 isoform x1
s2f_0001264004	1.4139	-2.167	1.6533	0.12896	0.65551	-5.1362	SAR1A-1	gtp-binding protein sar1a
s2f_0000677006	1.4139	-3.2026	1.5471	0.15255	0.68489	-5.2804	MYL5	myosin light chain 5
s2f_0227346001	1.4139	-3.9766	1.4954	0.16536	0.70332	-5.3485	s2f_0227346001	(genbank) unnamed protein product
s2f_0335897001	1.4139	-3.4856	1.336	0.21085	0.73616	-5.549	s2f_0335897001	uncharacterized protein loc110437756
s2f_0011706001	-1.4127	-2.8226	-1.6637	0.12682	0.65223	-5.1217	CD2	t-cell surface antigen cd2-like
s2f_0002558003	-1.4126	2.6099	-5.5441	0.00023695	0.0322	0.91135	SLC28A1	sodium/nucleoside cotransporter 1
s2f_0025121001	-1.4079	-0.41328	-2.0303	0.069478	0.53471	-4.5853	s2f_0025121001	uncharacterized loc102346638
s2f_0000451001	1.4062	2.5962	6.7232	4.9537e-05	0.014519	2.409	SLC39A14	zinc transporter zip8
s2f_0019034001	-1.4038	-0.6771	-4.539	0.001048	0.073203	-0.53835	SI:CH211-137I24.12	natural cytotoxicity triggering receptor 3-like isoform x1
s2f_0005396006	-1.4037	1.3241	-0.97519	0.35223	0.78374	-5.9411	ELFN2	protein phosphatase 1 regulatory subunit 29-like
s2f_0000004083	1.4021	5.527	12.057	2.5283e-07	0.0010113	7.0083	CYP1B1	cytochrome p450 1b1
s2f_0000257004	1.4012	-2.5515	1.2611	0.2356	0.75066	-5.6379	SMTNA	dystrophin-like
s2f_0001832004	1.4006	-2.4615	1.8052	0.10089	0.61603	-4.9209	RPS14	40s ribosomal protein s14
s2f_0004359006	-1.4003	0.48349	-1.7775	0.10555	0.62422	-4.9609	GJC1	gap junction gamma-1 protein-like
s2f_0071862001	-1.3935	-3.1227	-1.9099	0.084917	0.57637	-4.767	s2f_0071862001	coiled-coil domain-containing protein 106-like isoform x1
s2f_0019965001	-1.3935	-3.0986	-1.8223	0.098086	0.60909	-4.8959	SI:DKEYP-114G9.1	uncharacterized protein si:dkeyp-114g9.1
s2f_0000063022	1.3923	-1.4588	2.5355	0.029372	0.39114	-3.783	KCNA5	potassium voltage-gated channel subfamily a member 5
s2f_0004266006	1.3906	0.2378	3.9304	0.0027621	0.12787	-1.4892	HAS2	hyaluronan synthase 2
s2f_0000522012	-1.3896	-2.8181	-2.0962	0.06219	0.52176	-4.4839	RBM46	probable rna-binding protein 46
s2f_0005255004	-1.3896	-3.3464	-1.1827	0.26402	0.75982	-5.727	MESPBA	mesoderm posterior protein 1-like
s2f_0000016142	1.3856	-3.6279	1.6005	0.14026	0.66875	-5.2086	s2f_0000016142	leucine-rich repeat extensin-like protein 1
s2f_0004545004	-1.3838	2.9206	-3.546	0.0052181	0.17257	-2.1127	APOA4A	apolipoprotein a-iv-like
s2f_0032628001	-1.3823	-0.65083	-7.4215	2.1306e-05	0.0088465	3.1979	SI:CH211-266A5.12	uncharacterized loc106593189
s2f_0000482007	-1.3823	1.2927	-1.6754	0.12447	0.64967	-5.1054	GLDN	gliomedin
s2f_0001795004	1.3822	0.0031627	4.1776	0.0018522	0.10105	-1.097	SPSB2	spry domain-containing socs box protein 2
s2f_0005442005	-1.3821	4.5347	-4.4684	0.0011697	0.07806	-0.64611	BTG4	zona pellucida-like domain-containing protein 1
s2f_0000040038	-1.3808	-0.93641	-2.3826	0.038197	0.43555	-4.031	SI:CH211-157B11.8	fibroleukin-like
s2f_0004952015	-1.3802	-3.4818	-1.1787	0.26551	0.76092	-5.7313	OR90H4	olfactory receptor 4f6-like
s2f_0000273024	-1.3788	5.1661	-4.9166	0.00058944	0.055069	0.024809	MEP1A	meprin a subunit alpha
s2f_0002643001	-1.3786	4.918	-9.4292	2.5134e-06	0.0031308	5.1163	CYP51A1	lanosterol 14-alpha demethylase
s2f_0007575009	1.3768	-3.5594	2.5965	0.026444	0.37503	-3.6833	SI:CH211-132E22.4	uncharacterized protein si:ch211-132e22.4
s2f_0006005053	1.3768	-3.4888	1.7641	0.10787	0.62821	-4.9801	s2f_0006005053	gastrula zinc finger protein xlcgf49.1-like
s2f_0010108001	1.3757	0.55384	3.8381	0.003213	0.13801	-1.6376	ADM2	protein adm2
s2f_0010274001	1.3755	2.5445	4.4029	0.001296	0.082813	-0.74663	BHLHA9	class a basic helix-loop-helix protein 9
s2f_0001239008	-1.3753	0.74281	-5.8568	0.00015363	0.023922	1.3296	PGLYRP2	n-acetylmuramoyl-l-alanine amidase-like
s2f_0018773001	1.3729	-3.9464	2.1614	0.055701	0.49858	-4.3825	s2f_0018773001	voltage-dependent t-type calcium channel subunit alpha-1h-like
s2f_0000000089	-1.3724	-1.8709	-1.5039	0.1632	0.69917	-5.3374	GM54002	--
s2f_0007840002	-1.3696	0.38385	-2.1327	0.058476	0.5082	-4.4273	CCDC185	coiled-coil domain-containing protein 177-like
s2f_0002676003	-1.3688	0.49631	-1.9384	0.080998	0.56763	-4.7244	CDK19	cyclin-dependent kinase 19 isoform x1
s2f_0001079007	1.3645	4.7322	4.951	0.00055987	0.053994	0.075071	CMBL	carboxymethylenebutenolidase homolog
s2f_0020394001	1.3642	-1.3126	1.8503	0.093686	0.59592	-4.855	SI:DKEY-219E21.4	nuclear factor 7, ovary-like
s2f_0002440002	1.3611	3.7263	6.2389	9.2141e-05	0.019129	1.8198	PIR	pirin
s2f_0008509002	1.3605	3.0147	4.1203	0.0020305	0.1054	-1.1872	POMC	pro-opiomelanocortin-like
s2f_0004791001	-1.357	0.60924	-2.5329	0.029504	0.39122	-3.7873	NRTN	neurturin
s2f_0008385002	1.3531	0.5117	2.0843	0.063451	0.52286	-4.5023	CYP19, CYP19A1	aromatase
s2f_0002983025	-1.3525	-3.1693	-2.6193	0.025424	0.37005	-3.6458	s2f_0002983025	zinc finger protein 239-like
s2f_0335922001	-1.3525	-4.251	-2.3106	0.043208	0.45431	-4.1465	SI:DKEY-6A5.3	uncharacterized protein loc100034415
s2f_0042585001	-1.3525	-4.0483	-2.2916	0.044634	0.4595	-4.1769	s2f_0042585001	inositol hexakisphosphate and diphosphoinositol-pentakisphosphate kinase 1-like
s2f_0004197004	-1.3525	-4.1804	-2.2398	0.048753	0.47077	-4.2591	ZNF608	zinc finger protein 608 isoform x1
s2f_0011041001	-1.3525	-4.251	-2.1428	0.057486	0.50559	-4.4116	FAM180B	protein fam180b
s2f_0001863007	-1.3525	-3.3045	-2.1355	0.058192	0.50801	-4.4228	SI:DKEY-85K7.11	endonuclease domain-containing 1 protein-like
s2f_0033836001	-1.3525	-4.1804	-2.1055	0.061225	0.51961	-4.4696	CBR-GLH-4	hypothetical protein
s2f_0000224014	-1.3525	-4.0483	-2.0794	0.063972	0.52354	-4.5098	TFCP2L1	rna-directed dna polymerase from mobile element jockey-like
s2f_0000863035	-1.3525	-4.0483	-2.0687	0.065136	0.52621	-4.5263	NITR5	novel immune-type receptor 5 precursor
s2f_0024994001	-1.3525	-3.2548	-2.0011	0.072953	0.54577	-4.6297	SI:DKEY-191C17.2	uncharacterized protein si:dkey-191c17.2
s2f_0009878001	-1.3525	-3.9162	-1.9989	0.07323	0.54591	-4.6331	s2f_0009878001	g2/m phase-specific e3 ubiquitin-protein ligase-like
s2f_0010895001	-1.3525	-4.0785	-1.9415	0.080576	0.56763	-4.7197	MAJIN	membrane-anchored junction protein
s2f_0000411010	-1.3525	-3.7227	-1.8892	0.087869	0.58221	-4.7977	AAT1	acetyl-coa acetyltransferase, cytosolic
s2f_0018095001	-1.3525	-3.5906	-1.8753	0.089914	0.58838	-4.8183	GJD6	gap junction delta-2 protein-like
s2f_0000277006	-1.3525	-3.9869	-1.8137	0.099489	0.61175	-4.9085	s2f_0000277006	gastrula zinc finger protein xlcgf57.1-like
s2f_0015179001	-1.3525	-4.1189	-1.7671	0.10735	0.6275	-4.9758	DSIM_GD10413	zinc finger protein 135-like isoform x1
s2f_0013854001	-1.3525	-3.3659	-1.728	0.11436	0.63876	-5.0315	UPK2	uroplakin-2
s2f_0003532001	-1.3525	-3.7831	-1.714	0.11698	0.64331	-5.0513	PNMT	phenylethanolamine n-methyltransferase
s2f_0335826001	-1.3525	-3.2236	-1.7014	0.11937	0.64605	-5.069	s2f_0335826001	uncharacterized protein loc101884693
s2f_0062358001	-1.3525	-3.285	-1.6615	0.12728	0.65364	-5.1248	s2f_0062358001	sporozoite surface protein 2-like
s2f_0000047026	-1.3525	-3.1227	-1.629	0.13405	0.66089	-5.1697	s2f_0000047026	nlr family card domain-containing protein 3-like
s2f_0000072013	-1.3525	-3.5464	-1.6228	0.13538	0.66335	-5.1782	ABCG1	atp-binding cassette sub-family g member 1 isoform x1
s2f_0000034034	-1.3525	-3.9162	-1.6036	0.13957	0.66709	-5.2044	ABCC1	multidrug resistance-associated protein 1-like
s2f_0522577001	-1.3525	-4.0785	-1.5849	0.14374	0.67413	-5.2296	s2f_0522577001	high mobility group protein hmg-i/hmg-y-like isoform x1
s2f_0005870002	-1.3525	-2.5557	-1.5428	0.15359	0.68729	-5.2861	OSMR	leukemia inhibitory factor receptor-like
s2f_0000099012	-1.3525	-3.3464	-1.3788	0.1977	0.72942	-5.4967	H2BV3	histone h2b
s2f_0000060028	-1.3525	-2.5805	-1.3271	0.21369	0.73855	-5.5598	RHOB	rho-related gtp-binding protein rhob
s2f_0062368001	-1.3525	-2.9665	-1.2056	0.25544	0.75544	-5.7014	s2f_0062368001	ribonuclease inhibitor-like
s2f_0007044002	-1.3525	-2.7869	-1.0845	0.30335	0.77104	-5.8324	TDRD12	putative atp-dependent rna helicase tdrd12
s2f_0002384010	-1.3515	1.0332	-3.4566	0.0060643	0.18632	-2.2596	CLCA4	calcium-activated chloride channel regulator 1-like
s2f_0003422004	-1.3502	-0.46931	-2.1705	0.054852	0.49573	-4.3683	DIO2	type ii iodothyronine deiodinase
s2f_0002084003	-1.3495	-1.181	-1.8521	0.093417	0.59551	-4.8525	GPR139	probable g-protein coupled receptor 139
s2f_0017786001	1.3486	-3.2005	1.2196	0.2503	0.75408	-5.6855	s2f_0017786001	saxitoxin and tetrodotoxin-binding protein 1-like
s2f_0000120003	-1.3468	3.8332	-6.0906	0.0001121	0.022048	1.6323	LCT	lactase-phlorizin hydrolase
s2f_0057067001	-1.3468	-1.3392	-1.9762	0.076051	0.55281	-4.6674	s2f_0057067001	gastrula zinc finger protein xlcgf57.1-like
s2f_0000034027	1.3418	5.647	7.2919	2.481e-05	0.0092715	3.0567	ABCC12	multidrug resistance-associated protein 5-like
s2f_0006273003	-1.3408	5.8553	-7.5986	1.7355e-05	0.0074122	3.3873	FNDC7	fibronectin type iii domain-containing protein 7-like
s2f_0033219001	-1.3393	-1.8092	-2.7988	0.018655	0.31296	-3.3496	s2f_0033219001	butyrophilin-like protein 2
s2f_0000076029	-1.3375	0.5601	-2.7337	0.020871	0.33374	-3.4573	SSC4D	scavenger receptor cysteine-rich domain-containing group b protein
s2f_0015732001	-1.3357	0.08987	-2.5194	0.030195	0.39524	-3.8092	s2f_0015732001	mucin-5ac
s2f_0002371019	1.3342	0.98063	3.0546	0.012016	0.25697	-2.9253	s2f_0002371019	(genbank) hypothetical protein
s2f_0006051001	-1.3342	-1.123	-2.5392	0.029187	0.39078	-3.777	ZGC:111976	mediator of rna polymerase ii transcription subunit 1-like
s2f_0013988001	-1.3311	-0.34474	-4.849	0.00065241	0.057705	-0.074368	ZGC:194242	uncharacterized methyltransferase ydac-like
s2f_0001566003	-1.3293	2.9618	-3.4112	0.0065469	0.19302	-2.3344	MBL2	pulmonary surfactant-associated protein d-like
s2f_0003212001	-1.3283	3.8719	-3.7979	0.0034328	0.14414	-1.7025	GDA	guanine deaminase
s2f_0000205008	1.3273	0.030625	5.6186	0.00021345	0.029835	1.0124	TTLL9	probable tubulin polyglutamylase ttll9
s2f_0010336001	1.3247	0.55545	4.0629	0.0022274	0.11025	-1.2781	FAS	tumor necrosis factor receptor superfamily member 6
s2f_0011277001	-1.3242	-3.0986	-1.3597	0.20348	0.73166	-5.5202	LRRIQ3	leucine-rich repeat and iq domain-containing protein 3
s2f_0011040001	1.3238	0.33379	3.6755	0.0042035	0.15769	-1.901	GFRAL	gdnf family receptor alpha-like
s2f_0000906014	-1.3204	2.9387	-4.1607	0.001903	0.10242	-1.1236	CEACAM6	carcinoembryonic antigen-related cell adhesion molecule 1-like
s2f_0079458001	1.3152	-2.0291	0.92579	0.37613	0.79504	-5.9871	s2f_0079458001	zinc finger protein 883 isoform x1
s2f_0000016138	1.3137	-2.0702	1.5077	0.16224	0.69729	-5.3324	s2f_0000016138	hypothetical protein
s2f_0000165012	1.3131	-1.803	3.3016	0.007882	0.20954	-2.5155	FLT3	receptor-type tyrosine-protein kinase flt3
s2f_0011826001	-1.3124	-2.5757	-1.1203	0.28851	0.76914	-5.7947	s2f_0011826001	g-protein coupled receptor 183-like
s2f_0000012031	-1.3123	-0.60959	-1.3963	0.19253	0.72831	-5.4749	RPS6KA2	ribosomal protein s6 kinase 2 beta
s2f_0001369001	-1.3122	2.6029	-5.6305	0.00020994	0.029835	1.0284	XPNPEP2	xaa-pro aminopeptidase 2
s2f_0000736011	1.3122	-2.7509	1.4154	0.18701	0.72363	-5.451	PTGFR	prostaglandin f2-alpha receptor
s2f_0006031001	1.3079	3.2605	4.7367	0.00077344	0.062494	-0.24082	MDFI	myod family inhibitor-like
s2f_0001907002	1.3064	5.9662	6.3669	7.7973e-05	0.017396	1.979	UGDH	udp-glucose 6-dehydrogenase
s2f_0000056010	1.3041	-2.2418	1.9014	0.086119	0.57773	-4.7796	AN12G06890	heat shock 70 kda protein-like
s2f_0000081022	1.3032	5.5465	4.9096	0.00059561	0.055119	0.014631	GLIPR2	golgi-associated plant pathogenesis-related protein 1-like
s2f_0001685008	-1.3002	-0.26086	-1.2528	0.2385	0.7511	-5.6476	PTCHD4	patched domain-containing protein 1
s2f_0104245001	-1.2964	-2.4819	-1.7733	0.10626	0.62543	-4.9669	s2f_0104245001	gamma-crystallin m2-like
s2f_0001712003	1.293	-2.5886	1.9052	0.085575	0.57646	-4.7739	IL17A/F3	interleukin-17f-like
s2f_0003346002	1.293	-2.005	1.2642	0.23452	0.75066	-5.6343	s2f_0003346002	uncharacterized loc105847463
s2f_0005108003	1.293	-3.519	1.222	0.24943	0.75392	-5.6828	DUOXA2	dual oxidase maturation factor 1-like
s2f_0008328002	-1.2926	-1.2046	-2.5791	0.027247	0.38146	-3.7117	ZNF470	zinc finger protein 271-like
s2f_0009228001	1.2922	-0.49194	2.1085	0.060907	0.51877	-4.4648	CFAP126	protein flattop
s2f_0026551001	-1.2894	-2.7822	-1.1384	0.28121	0.76583	-5.7753	KISS2	kisspeptin 2
s2f_0000436005	-1.2875	0.49422	-2.7928	0.01885	0.31483	-3.3597	CYP27B1	25-hydroxyvitamin d-1 alpha hydroxylase, mitochondrial
s2f_0007096003	-1.2872	-1.214	-1.8028	0.10128	0.61744	-4.9244	TNFSF13B	tumor necrosis factor ligand superfamily member 13b
s2f_0010309001	-1.2849	-1.7422	-1.7156	0.11668	0.64331	-5.0491	CUNH11ORF65	uncharacterized protein c11orf65 homolog
s2f_0006516001	-1.2846	-0.029167	-1.789	0.10358	0.62332	-4.9443	STUM	protein stum homolog
s2f_0000018044	1.2844	-0.4784	2.1682	0.055059	0.49669	-4.3718	EFCAB2	dynein regulatory complex protein 8
s2f_0001407003	1.2839	-1.9678	1.5422	0.15374	0.6876	-5.2869	RPS15A	40s ribosomal protein s15aa
s2f_0000694009	-1.2837	-3.0948	-1.2557	0.23747	0.7511	-5.6441	164.T00001	phosphatidylinositol 4-phosphate 3-kinase c2 domain-containing subunit beta isoform x1
s2f_0004480001	-1.2826	-0.56072	-1.4043	0.1902	0.72622	-5.4649	NHLRC4	nhl-repeat-containing protein 4
s2f_0009213012	-1.2808	-1.8107	-1.4713	0.17164	0.70686	-5.3797	s2f_0009213012	protein nlrc5-like
s2f_0000134020	1.2803	-2.8204	1.5411	0.15401	0.6876	-5.2884	KCNK12	potassium channel subfamily k member 12
s2f_0019962001	-1.2798	-0.52407	-2.5505	0.028622	0.38929	-3.7585	SI:CH211-67F13.7	zona pellucida sperm-binding protein 3-like
s2f_0009342001	-1.2796	-1.768	-1.5455	0.15295	0.68596	-5.2826	SI:ZFOS-911D5.4	uncharacterized protein si:zfos-911d5.4
s2f_0001114022	1.2764	0.38087	4.8201	0.0006815	0.059227	-0.11702	s2f_0001114022	stonustoxin subunit alpha-like
s2f_0000149022	1.273	0.014159	2.4752	0.032582	0.40997	-3.8812	OTOL1	otolin-1
s2f_0032631001	1.2707	3.4873	4.8739	0.00062841	0.056649	-0.037742	SI:CH211-133N4.6	uncharacterized protein si:ch211-133n4.6
s2f_0000200002	-1.2687	-3.7125	-1.31	0.21919	0.74045	-5.5803	PGBD2	piggybac transposable element-derived protein 3-like
s2f_0000402024	-1.2687	-2.6548	-1.3032	0.22141	0.74118	-5.5884	ZBED8	zinc finger bed domain-containing protein 5-like
s2f_0000149030	-1.2675	2.1789	-5.9637	0.00013289	0.023592	1.4691	CBLN11	complement c1q-like protein 2
s2f_0000286012	1.2669	-0.39447	2.4044	0.036799	0.42974	-3.996	ZGC:152670	prolyl 4-hydroxylase subunit alpha-1-like
s2f_0000050047	-1.2667	-2.3454	-2.5169	0.030328	0.39524	-3.8134	OLFCG6	extracellular calcium-sensing receptor-like
s2f_0000210002	1.2647	-1.1315	2.1179	0.059958	0.51479	-4.4503	VTCN1	v-set domain-containing t-cell activation inhibitor 1
s2f_0000171015	1.2647	-1.2438	1.744	0.11145	0.63575	-5.0088	CRHR1	corticotropin-releasing factor receptor 1
s2f_0000256017	-1.2639	-2.2226	-1.3689	0.20069	0.72991	-5.5089	DSIM_GD15368	low-density lipoprotein receptor-related protein 1-like
s2f_0014089001	-1.2635	-2.1934	-4.0009	0.0024625	0.11836	-1.3766	CCL33.2	c-c motif chemokine 4-like
s2f_0000551010	-1.2583	0.4134	-2.2791	0.045592	0.46326	-4.1967	TRAF5	tnf receptor-associated factor 5 isoform x1
s2f_0004094005	1.2567	-0.1731	1.6114	0.13785	0.66603	-5.1937	RXFP3.2B	relaxin-3 receptor 1-like
s2f_0003906001	-1.256	-0.77875	-3.1764	0.0097555	0.23152	-2.723	HABP4	intracellular hyaluronan-binding protein 4
s2f_0005195004	-1.2554	-0.66311	-2.4683	0.032973	0.41251	-3.8925	BATF2	basic leucine zipper transcriptional factor atf-like 2
s2f_0004297002	-1.2552	-0.77588	-2.0755	0.064398	0.52354	-4.5159	LRRC74B	leucine-rich repeat-containing protein 74b
s2f_0001032006	-1.2542	1.3251	-1.7135	0.11707	0.64331	-5.052	KCNQ5A	potassium voltage-gated channel subfamily kqt member 5-like
s2f_0005504005	-1.2523	1.4704	-2.8411	0.017344	0.30146	-3.2796	SH3TC1	sh3 domain and tetratricopeptide repeat-containing protein 1 isoform x1
s2f_0002437001	-1.2522	2.8691	-3.5414	0.0052586	0.17326	-2.1202	MIOX	inositol oxygenase
s2f_0003494003	1.2521	-4.1804	2.4369	0.0348	0.42087	-3.9434	NOVA1	rna-binding protein nova-1 isoform x1
s2f_0003557003	1.2521	-4.1189	2.3105	0.043212	0.45431	-4.1466	DTNA	dystrobrevin alpha isoform x1
s2f_0285846001	1.2521	-4.1804	2.0439	0.067912	0.53238	-4.5645	s2f_0285846001	collagen alpha-2(ix) chain-like
s2f_0000492012	1.2521	-3.4181	1.9065	0.085395	0.57637	-4.772	HBA4	hemoglobin subunit alpha-like
s2f_0008805066	1.2521	-3.7227	1.8348	0.096098	0.60436	-4.8777	s2f_0008805066	uncharacterized protein loc113040794
s2f_0000169009	1.2521	-3.2338	1.8145	0.099362	0.61122	-4.9074	TUB4	tubulin beta chain
s2f_0020395001	1.2521	-3.9254	1.6824	0.12308	0.64962	-5.0957	s2f_0020395001	tyrosine-protein phosphatase non-receptor type substrate 1-like
s2f_0000112018	1.2521	-4.1189	1.5855	0.14361	0.67413	-5.2289	MPK4	hypothetical protein
s2f_0000042017	1.2521	-2.9567	1.4879	0.1673	0.70456	-5.3583	FAM221A	zinc finger mym-type protein 1-like
s2f_0000272005	1.2521	-3.7227	1.4255	0.18417	0.72067	-5.4383	YWHAZ	14-3-3-like protein
s2f_0002232002	1.2521	-3.063	1.4211	0.18541	0.72202	-5.4439	RPL13A	60s ribosomal protein l13a
s2f_0004790006	1.2521	-3.0181	1.2742	0.2311	0.74879	-5.6226	GPR55	g-protein coupled receptor 55-like
s2f_0000437007	1.2521	-3.9427	1.1918	0.26059	0.75963	-5.7169	CACNA1C	voltage-dependent calcium channel type a subunit alpha-1-like
s2f_0156300001	1.2521	-3.481	1.0486	0.31881	0.77461	-5.8691	s2f_0156300001	iq motif and sec7 domain-containing protein 2-like
s2f_0000588001	-1.2509	-2.4255	-1.3954	0.1928	0.72831	-5.4761	NILT2	cmrf35-like molecule 1
s2f_0002262010	-1.2504	-0.73874	-3.6743	0.0042121	0.15769	-1.903	C1S.2	complement c1s subcomponent-like
s2f_0004115002	1.2469	1.0188	4.5133	0.0010907	0.074874	-0.5775	PANX3	pannexin-3 isoform x1
s2f_0001939013	-1.2454	-0.96276	-2.3408	0.041033	0.4487	-4.0982	IFI44	interferon-induced protein 44-like
s2f_0004060001	-1.2436	-1.7182	-1.4775	0.17003	0.70686	-5.3718	NEU4	sialidase-4
s2f_0005879057	1.2434	-2.2662	1.691	0.1214	0.64864	-5.0837	s2f_0005879057	zinc finger protein 501-like
s2f_0001100001	-1.2415	-0.58129	-1.3535	0.20539	0.73253	-5.5277	s2f_0001100001	--
s2f_0000028003	1.2388	-2.5251	1.6542	0.12877	0.65537	-5.1349	PROP1	homeobox protein prophet of pit-1-like
s2f_0004328002	1.2384	1.6438	4.4027	0.0012964	0.082813	-0.74691	DHRS13B.2	tapasin-related protein-like
s2f_0004150002	1.2372	8.2929	4.6001	0.00095357	0.069872	-0.44583	MGST3	microsomal glutathione s-transferase 3-like
s2f_0005895001	-1.236	1.5786	-1.6517	0.1293	0.65551	-5.1385	PRAG1	inactive tyrosine-protein kinase prag1
s2f_0138522001	1.2353	-0.62287	1.5231	0.1584	0.69342	-5.3122	s2f_0138522001	putative uncharacterized protein myh16
s2f_0006935001	-1.2352	3.4606	-4.7519	0.00075575	0.061786	-0.21819	MSMB	beta-microseminoprotein-like
s2f_0008805018	-1.2317	-2.653	-1.7369	0.11273	0.63736	-5.0189	s2f_0008805018	contactin-3-like
s2f_0000000024	-1.2317	-3.6208	-1.6035	0.13958	0.66709	-5.2045	s2f_0000000024	rna-directed dna polymerase homolog
s2f_0001892002	-1.2317	-2.919	-1.5844	0.14386	0.67413	-5.2304	RPS3A	40s ribosomal protein s3a
s2f_0000094021	-1.2317	-2.9999	-1.4895	0.16688	0.70426	-5.3561	166.T00006	hypothetical protein
s2f_0000089035	-1.2317	-3.6823	-1.3823	0.19667	0.72893	-5.4924	OR55D1	olfactory receptor 52k1-like
s2f_0024025001	-1.2317	-3.9766	-1.286	0.22713	0.7444	-5.6088	s2f_0024025001	zinc finger protein 239-like
s2f_0015800001	-1.2317	-2.3559	-1.218	0.2509	0.75444	-5.6874	ORG	oogenesis-related
s2f_0061153001	1.2314	-0.22966	2.3521	0.040245	0.44254	-4.08	s2f_0061153001	maguk p55 subfamily member 4-like
s2f_0009898007	-1.231	-2.1793	-1.2811	0.22879	0.74642	-5.6146	s2f_0009898007	p2y purinoceptor 1-like
s2f_0000598021	1.2308	0.71842	3.9447	0.0026984	0.12645	-1.4664	FPR1	chemokine-like receptor 1
s2f_0003812014	1.2287	-0.97475	2.2098	0.051306	0.48134	-4.3065	s2f_0003812014	uncharacterized protein f54h12.2-like
s2f_0009010009	1.2281	-1.2346	1.696	0.12042	0.64787	-5.0766	WU:FC27B11	lysine-specific demethylase 5b-like
s2f_0051548001	-1.2273	0.28784	-3.5161	0.0054861	0.17628	-2.1617	s2f_0051548001	cd59 glycoprotein-like
s2f_0000185017	-1.2259	-0.44737	-2.036	0.068812	0.5347	-4.5765	MCHR1A	melanin-concentrating hormone receptor 1-like
s2f_0001692004	-1.2256	0.1639	-4.0398	0.0023123	0.11322	-1.3148	MLXIPL	carbohydrate-responsive element-binding protein isoform x1
s2f_0000050027	1.2242	-0.84431	3.4601	0.0060287	0.18581	-2.2539	s2f_0000050027	extracellular calcium-sensing receptor-like
s2f_0000437004	-1.224	-1.2761	-1.2619	0.23533	0.75066	-5.637	CACNA1D	voltage-dependent l-type calcium channel subunit alpha-1d isoform x1
s2f_0000098013	1.2238	-2.7638	1.6334	0.13311	0.66068	-5.1636	SYT19	hypothetical protein
s2f_0006779001	1.2238	-2.0945	1.309	0.2195	0.74045	-5.5814	FAM83A	protein fam83a
s2f_0001987003	-1.2218	-0.48234	-4.6015	0.00095144	0.069872	-0.44364	GPAT2	glycerol-3-phosphate acyltransferase 2, mitochondrial
s2f_0010762001	1.2209	4.6699	6.0553	0.00011752	0.022521	1.5871	CUNH11ORF96	uncharacterized protein c11orf96 homolog
s2f_0002256008	-1.2206	-1.2368	-4.794	0.00070899	0.060908	-0.15569	AREG	amphiregulin
s2f_0008108001	-1.2206	-2.399	-1.5082	0.16212	0.69715	-5.3318	FBXL13	dynein regulatory complex subunit 6
s2f_0000685003	-1.2205	5.533	-7.3392	2.3464e-05	0.0091665	3.1085	SLC13A2	solute carrier family 13 member 2
s2f_0001746009	-1.2203	5.2051	-5.0316	0.00049667	0.049827	0.19199	CP	ceruloplasmin
s2f_0001144004	-1.2187	3.769	-4.5417	0.0010436	0.073203	-0.53428	DHCR7	7-dehydrocholesterol reductase
s2f_0001056004	-1.2168	0.34628	-1.7397	0.11222	0.63729	-5.0149	ELMOD3	elmo domain-containing protein 3
s2f_0025474001	-1.2166	-0.46374	-1.0652	0.31159	0.77325	-5.8523	s2f_0025474001	arf-gap with gtpase, ank repeat and ph domain-containing protein 3-like
s2f_0000424013	-1.2152	0.051814	-3.4654	0.0059747	0.18522	-2.2451	CRYGA.3.S	gamma-crystallin m2-like
s2f_0000847006	1.2149	4.4646	5.9537	0.00013471	0.023592	1.456	PLEKHF1	pleckstrin homology domain-containing family f member 1
s2f_0000001124	-1.2126	-0.47309	-3.1285	0.010587	0.24125	-2.8025	PROC	coagulation factor ix-like
s2f_0000202032	1.2119	2.2776	4.0051	0.0024461	0.11795	-1.37	SI:DKEY-225N22.4	collagen alpha-1(xxi) chain-like
s2f_0000004059	1.2109	6.6396	5.9405	0.00013713	0.023592	1.4389	CYP2K8	cytochrome p450 2k1-like
s2f_0000085006	-1.2106	0.31022	-2.3983	0.037185	0.43105	-4.0058	AQP4	aquaporin-4-like
s2f_0000516007	1.2101	9.2776	4.4432	0.0012166	0.079081	-0.68459	FRIM	ferritin, middle subunit-like
s2f_0005231003	1.2083	-2.6068	0.93799	0.37012	0.79294	-5.976	CLDN33A	putative claudin-24
s2f_0002687005	-1.2073	0.91825	-1.1883	0.26189	0.75963	-5.7207	CSRNP2	cysteine/serine-rich nuclear protein 2
s2f_0000336013	-1.2066	-1.987	-1.1515	0.27604	0.76296	-5.7612	OXGR1	2-oxoglutarate receptor 1-like
s2f_0003018004	-1.2034	5.7117	-5.8832	0.00014821	0.023822	1.3642	PNP4A	purine nucleoside phosphorylase-like
s2f_0008118015	-1.2034	-2.1965	-1.8656	0.091359	0.59212	-4.8326	s2f_0008118015	oocyte zinc finger protein xlcof6-like
s2f_0068608001	-1.2034	-4.2176	-1.8643	0.091555	0.59212	-4.8345	s2f_0068608001	vegetative cell wall protein gp1-like
s2f_0000950005	-1.2034	-1.9441	-1.3968	0.1924	0.72831	-5.4744	PLS2	phospholipid scramblase family member 5-like
s2f_0000262028	-1.2034	-2.1482	-1.1585	0.27329	0.76139	-5.7535	OR101-1	olfactory receptor 2ap1-like
s2f_0003897002	-1.2034	-3.6893	-1.092	0.3002	0.77104	-5.8246	ETV2	ets-like protein pointed isoform x1
s2f_0001350005	-1.2034	-3.5051	-1.0804	0.30505	0.77236	-5.8365	KDM4D	lysine-specific demethylase 4d-like
s2f_0008805017	-1.2034	-3.2619	-1.0229	0.33023	0.77568	-5.8948	s2f_0008805017	uncharacterized protein loc107570325
s2f_0009572001	-1.2029	1.1533	-1.6861	0.12236	0.64951	-5.0906	SRRM4	serine/arginine repetitive matrix protein 4
s2f_0000171003	1.2018	-1.6698	1.2861	0.2271	0.7444	-5.6087	CALCRL2	calcitonin gene-related peptide type 1 receptor-like
s2f_0000272007	-1.1999	-2.2459	-1.6189	0.13622	0.66436	-5.1835	18.M06529	hypothetical protein
s2f_0028568001	1.1994	-1.9777	2.6543	0.023932	0.35846	-3.5882	s2f_0028568001	myosin heavy chain, fast skeletal muscle-like
s2f_0000016005	1.1962	3.0035	3.0633	0.011837	0.25533	-2.9107	s2f_0000016005	(genbank) hypothetical protein
s2f_0011380001	-1.1939	0.17385	-3.2961	0.0079564	0.2105	-2.5246	TMEM37	voltage-dependent calcium channel gamma-like subunit
s2f_0009299001	-1.1921	-0.7838	-2.4783	0.032411	0.40906	-3.8763	CUNH14ORF132	uncharacterized protein c14orf132-like
s2f_0009760002	-1.1907	-3.3567	-1.4342	0.18172	0.71841	-5.4272	s2f_0009760002	e3 ubiquitin/isg15 ligase trim25-like
s2f_0000001123	-1.1905	4.0036	-3.7638	0.0036312	0.14871	-1.7576	CFAD	mast cell protease 1a-like
s2f_0000002010	1.1891	0.55354	2.0587	0.066239	0.52835	-4.5417	CDX4	homeobox protein cdx-4
s2f_0005007001	1.1878	7.0129	5.9792	0.00013015	0.023592	1.4891	SQSTM1	sequestosome-1 isoform x1
s2f_0005325001	-1.1878	-1.8004	-1.256	0.23737	0.7511	-5.6438	ES1	es1 protein homolog, mitochondrial-like
s2f_0018182001	-1.1872	-2.0628	-1.0658	0.31133	0.77325	-5.8516	CD86	t-lymphocyte activation antigen cd80-like
s2f_0002142005	1.1832	-1.628	2.8455	0.017213	0.30138	-3.2723	P2RY13	p2y purinoceptor 13-like
s2f_0000099015	1.1832	-2.1258	1.6232	0.13529	0.66335	-5.1776	HTB1	histone h2b
s2f_0335890001	1.1832	-2.5604	1.508	0.16216	0.69715	-5.332	s2f_0335890001	proline-rich protein 36-like
s2f_0335834001	1.1832	-3.5372	1.1521	0.27581	0.76273	-5.7605	s2f_0335834001	predicted gpi-anchored protein 23
s2f_0000522006	1.1832	-2.7153	1.0882	0.30178	0.77104	-5.8285	DND1	dead end protein homolog 1
s2f_0001112009	-1.1815	1.7486	-5.4302	0.00027842	0.035708	0.75506	SI:DKEY-72L14.3	hyaluronidase-2-like
s2f_0000027008	1.18	4.3159	4.7513	0.00075641	0.061786	-0.21904	TG	thyroglobulin
s2f_0005418001	-1.1799	-0.33149	-3.1777	0.0097333	0.23152	-2.7208	GDF2	growth/differentiation factor 2
s2f_0006215002	1.1771	2.515	5.4439	0.00027307	0.035494	0.7739	SI:CH211-210P4.6	malignant fibrous histiocytoma-amplified sequence 1 homolog
s2f_0062360001	1.1768	-0.843	2.5389	0.029202	0.39078	-3.7775	DHRSX	dehydrogenase/reductase sdr family member on chromosome x-like
s2f_0001908005	-1.1766	9.3747	-5.3801	0.00029907	0.037254	0.68564	APOB	apolipoprotein b-100-like
s2f_0003804001	-1.1757	-1.7972	-1.5655	0.14821	0.68057	-5.2558	AGABI2DRAFT_120662	cysteine-rich with egf-like domain protein 2
s2f_0004726004	-1.1733	0.62558	-3.4998	0.0056387	0.17924	-2.1885	HCAR1-3	hydroxycarboxylic acid receptor 2-like
s2f_0001291007	-1.1726	4.5597	-6.2604	8.9571e-05	0.019127	1.8468	CYP7A1	cholesterol 7-alpha-monooxygenase
s2f_0000336019	-1.1706	1.2254	-1.6128	0.13755	0.66589	-5.1919	P2RY6	p2y purinoceptor 6
s2f_0000580003	1.1697	1.3154	4.184	0.0018333	0.101	-1.087	NPHS2	podocin
s2f_0011934001	1.1682	-0.57922	2.8862	0.016048	0.2924	-3.2048	C12ORF42	hypothetical protein
s2f_0000038035	1.1682	-3.285	1.8802	0.089183	0.58665	-4.811	CBR-NMR-1	glutamate receptor ionotropic, nmda 1-like
s2f_0335840001	1.1682	-2.9502	1.4796	0.16947	0.7062	-5.369	s2f_0335840001	mucin-2-like
s2f_0002983014	1.1682	-2.6851	1.3812	0.19698	0.72931	-5.4937	SI:DKEY-14D8.1	zinc finger protein 345-like isoform x1
s2f_0011703001	1.1682	-2.3589	1.3479	0.20712	0.73397	-5.5346	MBOAT4	ghrelin o-acyltransferase
s2f_0131743001	1.1682	-2.8749	1.1936	0.25988	0.75938	-5.7148	s2f_0131743001	uncharacterized protein loc109087496
s2f_0003140001	-1.1677	1.2169	-2.7044	0.021953	0.34478	-3.5057	AGTR1	type-1 angiotensin ii receptor
s2f_0033220001	1.1676	-1.1803	2.0372	0.06868	0.5347	-4.5748	s2f_0033220001	tripartite motif-containing protein 35-like
s2f_0000016051	-1.1666	-0.50637	-1.5465	0.15271	0.6853	-5.2812	s2f_0000016051	--
s2f_0001049018	-1.1665	-0.76016	-3.693	0.0040832	0.15531	-1.8725	s2f_0001049018	hypothetical protein
s2f_0022351001	1.1664	-0.57033	3.7773	0.0035512	0.14664	-1.7357	s2f_0022351001	antigen wc1.1-like
s2f_0022306001	-1.1631	0.69396	-3.207	0.0092586	0.22638	-2.6722	DRLL.1	zinc finger protein 239-like
s2f_0006005005	-1.1629	-2.272	-1.6297	0.1339	0.66068	-5.1687	s2f_0006005005	zinc finger protein 501-like
s2f_0000252013	-1.1624	-2.9353	-1.0823	0.30429	0.77155	-5.8347	DSIM_GD15806	serine/threonine-protein phosphatase alpha-2 isoform
s2f_0006695001	1.1611	1.3079	3.7363	0.0038006	0.14896	-1.8022	SI:CH211-256E16.4	5-hydroxytryptamine receptor 3a-like
s2f_0000743015	-1.1599	2.4917	-4.4781	0.0011521	0.077227	-0.63121	CX28.1	gap junction cx32.2 protein-like
s2f_0000084044	-1.1598	0.0032967	-4.3804	0.0013425	0.084321	-0.78124	LYL1	protein lyl-1
s2f_0000032016	1.1579	3.3044	2.9356	0.01474	0.28393	-3.1228	ARF4	adp-ribosylation factor 4-like
s2f_0001237001	-1.1565	4.4788	-6.1827	9.9213e-05	0.020041	1.7491	NPC1L1	npc1-like intracellular cholesterol transporter 1
s2f_0003587002	1.1549	-2.0674	1.4191	0.18596	0.72275	-5.4463	CDKN2A/B	cyclin-dependent kinase 4 inhibitor b
s2f_0001257007	1.153	1.6275	2.8825	0.016151	0.2924	-3.211	SI:CH211-286B5.6	b-cell receptor cd22-like
s2f_0009534001	-1.1521	-1.1988	-1.3138	0.21795	0.73924	-5.5757	PIFO	protein pitchfork
s2f_0010065001	-1.152	-1.1396	-1.1892	0.26154	0.75963	-5.7197	CCDC78	coiled-coil domain-containing protein 78
s2f_0007241004	1.1519	-0.28327	1.9503	0.079401	0.56374	-4.7065	FGF21	fibroblast growth factor 21-like
s2f_0000755002	-1.1518	1.8165	-3.6319	0.0045198	0.16429	-1.9721	ZGC:174356	proton-coupled folate transporter-like
s2f_0000107003	-1.1515	1.2535	-3.1038	0.011044	0.24604	-2.8435	SEMA3H	semaphorin-3a-like
s2f_0011859001	-1.1511	-1.1305	-1.6352	0.13274	0.66031	-5.1612	SHFL	repressor of yield of denv protein
s2f_0006639016	-1.1506	-1.4405	-1.7606	0.10848	0.62975	-4.9851	s2f_0006639016	uncharacterized protein loc102081204
s2f_0003483006	-1.148	-0.66932	-1.939	0.080909	0.56763	-4.7234	HAVCR2	hepatitis a virus cellular receptor 1 homolog
s2f_0000076003	-1.1478	-3.519	-1.6502	0.12959	0.65619	-5.1404	CD5L	cd5 antigen-like
s2f_0005135004	-1.1474	-0.34301	-3.3887	0.0068006	0.19663	-2.3715	TTC21A	tetratricopeptide repeat protein 21a isoform x1
s2f_0000002037	-1.1453	-0.17052	-2.2402	0.048721	0.47077	-4.2585	NKX2-5	homeobox protein nkx-2.5
s2f_0003865003	1.1431	-1.8235	1.4583	0.17513	0.7104	-5.3965	OVOL3	putative transcription factor ovo-like protein 3
s2f_0008805059	-1.1413	-0.34807	-1.5333	0.1559	0.69067	-5.2987	s2f_0008805059	uncharacterized protein loc107690522
s2f_0000522002	-1.1411	3.8855	-3.2916	0.0080164	0.21089	-2.5319	A1CF	apobec1 complementation factor isoform x1
s2f_0004725004	1.1399	-2.9829	1.0741	0.30775	0.77284	-5.8431	LTC4S	leukotriene c4 synthase
s2f_0002281001	1.139	3.1399	3.7325	0.0038243	0.14926	-1.8084	AHRR	aryl hydrocarbon receptor repressor
s2f_0000346002	-1.1365	-0.5934	-1.0683	0.31024	0.77293	-5.849	MSH4	muts protein homolog 4
s2f_0000147024	-1.1361	-0.19004	-3.3245	0.0075816	0.20383	-2.4776	WNT9A	protein wnt-9a
s2f_0003366007	-1.1339	-0.6454	-1.9257	0.082718	0.572	-4.7434	SI:CH73-177H5.3	myelin-associated glycoprotein-like
s2f_0010695001	1.1312	-3.6823	2.6008	0.026248	0.37455	-3.6762	s2f_0010695001	zinc finger protein 239-like
s2f_0038842001	1.1312	-1.5554	2.0794	0.063974	0.52354	-4.5099	SI:CH73-122K23.1	apolipoprotein l3-like
s2f_0000090006	1.1312	-3.4888	1.9202	0.08347	0.57366	-4.7515	CYP7	peptidyl-prolyl cis-trans isomerase cyp19-3
s2f_0001907001	1.1312	-2.7045	1.9064	0.085413	0.57637	-4.7722	UGDH1	hypothetical protein
s2f_0002526007	1.1312	-3.4888	0.95404	0.36233	0.78914	-5.9611	ASB14	dynein heavy chain 12, axonemal-like
s2f_0006232003	-1.1301	-1.9818	-1.1035	0.29538	0.77013	-5.8125	TMEM74B	transmembrane protein 74b
s2f_0013990001	-1.1298	-0.0058548	-2.8004	0.018606	0.31296	-3.3471	MORN2	morn repeat-containing protein 2
s2f_0003845001	1.1275	-0.069763	2.0401	0.06834	0.53446	-4.5702	PERF	perforin-1-like
s2f_0004688004	1.1273	-2.4623	1.0616	0.31314	0.77328	-5.8559	TBX19	t-box transcription factor tbx19
s2f_0000447009	-1.1267	-1.1689	-1.1074	0.29378	0.77013	-5.8084	GCK	glucokinase
s2f_0129227001	1.1246	-1.699	0.88504	0.3967	0.80064	-6.0236	s2f_0129227001	uncharacterized protein loc107707348 isoform x1
s2f_0004106002	1.1238	5.0553	5.174	0.00040286	0.044607	0.39601	ETHE1	persulfide dioxygenase ethe1, mitochondrial
s2f_0000096020	-1.1234	-1.7803	-1.198	0.25826	0.75801	-5.7099	H3F3A	histone h3.3-like
s2f_0008371002	1.123	-1.1305	1.0237	0.32985	0.77568	-5.894	FAM183A	protein fam183a
s2f_0088838001	1.1221	-0.14603	1.8012	0.10154	0.61824	-4.9266	s2f_0088838001	(genbank) unnamed protein product
s2f_0000321006	-1.1219	1.667	-1.1659	0.27042	0.76139	-5.7454	AGO2	protein argonaute-2 isoform x1
s2f_0001488004	-1.1219	-3.0171	-1.0974	0.29792	0.77021	-5.8189	ROBO4	roundabout homolog 2-like
s2f_0001628007	-1.1215	-1.2938	-1.0887	0.30158	0.77104	-5.828	UNC13B	protein unc-13 homolog b-like
s2f_0000673045	-1.1205	1.2583	-2.3128	0.043048	0.45431	-4.1431	s2f_0000673045	sialoadhesin-like
s2f_0030218001	-1.1195	-1.066	-1.1442	0.27892	0.76501	-5.7691	s2f_0030218001	uncharacterized loc106606555
s2f_0002228004	-1.1186	3.3869	-7.7264	1.5e-05	0.0067946	3.5213	SQLE	squalene monooxygenase
s2f_0009449001	1.1185	-3.1181	1.1588	0.2732	0.76139	-5.7533	M1AP	meiosis 1 arrest protein
s2f_0000302005	1.1166	-0.87827	2.4206	0.03579	0.42594	-3.9698	S100A1	protein s100-a1-like
s2f_0001784006	1.115	0.35127	3.0311	0.012509	0.25986	-2.9642	PHOSPHO1	phosphoethanolamine/phosphocholine phosphatase isoform x1
s2f_0001902002	-1.1148	2.8056	-1.643	0.1311	0.65834	-5.1504	RORB	nuclear receptor ror-beta
s2f_0000343021	-1.1141	-2.2163	-1.0121	0.33509	0.77671	-5.9054	TAAR13A	trace amine-associated receptor 13c-like
s2f_0006727002	1.1134	-0.68691	3.4081	0.0065807	0.19326	-2.3394	SPDEF	sam pointed domain-containing ets transcription factor
s2f_0010617001	-1.113	-1.1477	-1.8597	0.092243	0.59243	-4.8412	SI:CH211-11C3.9	integumentary mucin c.1-like
s2f_0003038002	-1.1107	0.18532	-2.9079	0.015461	0.28987	-3.1689	NAGS	n-acetylglutamate synthase, mitochondrial
s2f_0010215001	-1.1104	-1.5526	-1.23	0.24657	0.75238	-5.6738	AMH	muellerian-inhibiting factor
s2f_0010700001	-1.1103	4.3754	-4.1202	0.0020308	0.1054	-1.1874	SI:DKEY-69O16.5	alpha-aspartyl dipeptidase-like
s2f_0002359006	1.1102	-0.47518	1.9804	0.075523	0.55164	-4.6611	EMP3B	epithelial membrane protein 3-like
s2f_0010821001	-1.1101	-2.2914	-1.1784	0.26563	0.76092	-5.7317	s2f_0010821001	golgin subfamily a member 6-like protein 22
s2f_0003205001	1.1088	0.27896	2.2652	0.046692	0.46629	-4.2189	SPATA4	spermatogenesis-associated protein 4
s2f_0001640008	-1.1082	3.3472	-5.4086	0.00028715	0.036375	0.72513	PDZD3	na(+)/h(+) exchange regulatory cofactor nhe-rf3-like
s2f_0002306005	-1.1078	1.1787	-1.488	0.16726	0.70456	-5.3581	ARHGAP20B	rho gtpase-activating protein 20-like
s2f_0001628003	-1.1069	-3.526	-2.9538	0.014287	0.27886	-3.0927	UNC-13	hypothetical protein
s2f_0098913001	-1.1069	-4.1097	-2.2287	0.049685	0.47456	-4.2767	s2f_0098913001	novel immune-type receptor 14
s2f_0001349010	-1.1069	-3.9776	-2.186	0.053427	0.48786	-4.344	PIMR128	serine/threonine-protein kinase pim-1-like
s2f_0008805060	-1.1069	-3.9162	-1.9613	0.077965	0.55815	-4.6899	s2f_0008805060	uncharacterized protein loc107730409
s2f_0008798007	-1.1069	-3.9162	-1.7806	0.10502	0.62417	-4.9564	SI:DKEY-75A21.2	uncharacterized protein si:dkey-75a21.2 isoform x1
s2f_0002029004	-1.1069	-3.7841	-1.7626	0.10813	0.62851	-4.9822	RPS11	40s ribosomal protein s11
s2f_0000060003	-1.1069	-4.1804	-1.5948	0.14151	0.67196	-5.2162	RHO1	hypothetical protein
s2f_0031273001	-1.1069	-4.1804	-1.5715	0.14683	0.67965	-5.2478	s2f_0031273001	cadherin-7-like
s2f_0574066001	-1.1069	-4.272	-1.5651	0.14832	0.68057	-5.2564	s2f_0574066001	(genbank) unnamed protein product
s2f_0009705002	-1.1069	-3.7227	-1.5368	0.15505	0.68974	-5.2941	PENK	proenkephalin-a
s2f_0000014048	-1.1069	-3.4678	-1.5296	0.15679	0.69202	-5.3036	MYH16	myosin heavy chain, muscle-like
s2f_0000059020	-1.1069	-3.9869	-1.4978	0.16475	0.70243	-5.3454	s2f_0000059020	cd209 antigen-like protein e
s2f_0002462005	-1.1069	-3.1711	-1.4757	0.17049	0.70686	-5.3741	NPM2	nucleoplasmin-like
s2f_0000277049	-1.1069	-4.1399	-1.44	0.18012	0.71568	-5.4199	s2f_0000277049	gastrula zinc finger protein xlcgf57.1-like
s2f_0006005023	-1.1069	-4.1804	-1.4181	0.18626	0.72278	-5.4477	s2f_0006005023	zinc finger protein 239-like
s2f_0006005003	-1.1069	-4.2418	-1.4126	0.18781	0.72451	-5.4545	s2f_0006005003	gastrula zinc finger protein xlcgf57.1-like
s2f_0000879002	-1.1069	-3.4353	-1.3915	0.19396	0.72831	-5.481	CXCL11	c-x-c motif chemokine 10-like
s2f_0000047035	-1.1069	-3.9162	-1.3026	0.22163	0.74118	-5.5892	s2f_0000047035	protein nlrc3-like
s2f_0000028001	-1.1069	-1.4966	-1.2284	0.24713	0.75238	-5.6755	NOBOX	homeobox protein nobox
s2f_0000175016	-1.1069	-3.6116	-1.2038	0.25609	0.75608	-5.7033	s2f_0000175016	histone h4-like
s2f_0001605003	-1.1069	-1.5424	-1.1863	0.26263	0.75963	-5.7229	LSM14B	protein lsm14 homolog b isoform x1
s2f_0012146001	-1.1069	-3.5665	-1.1742	0.26724	0.76114	-5.7363	BTBD16	btb/poz domain-containing protein 16
s2f_0006530002	-1.1069	-4.0242	-1.155	0.27468	0.76244	-5.7574	PROK2	toxin mit1-like
s2f_0000118024	-1.1069	-2.4816	-1.1291	0.28496	0.76794	-5.7854	NPY1R	neuropeptide y receptor type 1
s2f_0010704001	-1.1069	-2.7116	-1.0931	0.2997	0.77104	-5.8233	GHRH	somatoliberin
s2f_0001100028	-1.1069	-4.0785	-1.0869	0.30231	0.77104	-5.8298	s2f_0001100028	(genbank) conserved hypothetical protein
s2f_0000542005	-1.1069	-3.0382	-1.0582	0.31458	0.77365	-5.8593	SCN5A	sodium channel protein type 4 subunit alpha b-like
s2f_0000373004	-1.1069	-3.4252	-1.0445	0.3206	0.77461	-5.8732	DMC1	meiotic recombination protein dmc1/lim15 homolog
s2f_0007687008	-1.1069	-1.9733	-0.91235	0.38283	0.797	-5.9993	s2f_0007687008	low quality protein: uncharacterized protein loc107566273
s2f_0008403001	-1.1055	2.8137	-1.7263	0.11468	0.63907	-5.0339	SI:CH211-194B1.1	protein wiz-like
s2f_0018752001	1.1029	-2.0793	2.2671	0.046536	0.46593	-4.2158	TAS2R60	taste receptor type 2 member 1-like
s2f_0019722001	1.1029	-2.3894	1.8996	0.086373	0.57773	-4.7823	TMEM274, GM13097, TM274	hypothetical protein
s2f_0006456001	1.1029	-3.5665	1.6447	0.13075	0.65824	-5.1481	AFTPH	aftiphilin isoform x1
s2f_0001102007	1.1029	-3.7902	1.2318	0.24591	0.75238	-5.6717	BMA-WVE-1	wiskott-aldrich syndrome protein family member 3 isoform x1
s2f_0000640002	1.1029	-3.526	1.2192	0.25047	0.75409	-5.686	SLC25A5	adp/atp translocase 2
s2f_0030802001	1.102	-0.9547	1.8042	0.10105	0.61665	-4.9223	SI:DKEY-195M11.11	uncharacterized protein si:dkey-195m11.11
s2f_0002673002	-1.1012	-1.6672	-1.1954	0.25921	0.75886	-5.7128	SI:DKEY-29B11.3	actin-binding rho-activating protein-like
s2f_0009408001	1.1001	0.66373	2.0439	0.067906	0.53238	-4.5644	GPR84	g-protein coupled receptor 84
s2f_0002067004	-1.0985	2.113	-5.7729	0.00017236	0.02629	1.2189	ANG	ribonuclease-like 3
s2f_0000182001	1.0983	2.6705	1.7733	0.10626	0.62543	-4.9668	NXNA	hypothetical protein
s2f_0019872001	1.0977	-0.80015	1.8941	0.087163	0.5801	-4.7904	SI:CH73-106K19.5	hypothetical protein
s2f_0000108006	1.0973	7.461	5.775	0.00017185	0.02629	1.2217	UGT2A1	udp-glucuronosyltransferase 2a1-like
s2f_0008170002	-1.0958	-0.741	-1.9786	0.075753	0.55237	-4.6639	GPR141	probable g-protein coupled receptor 141
s2f_0000879001	1.0948	-0.24917	1.9406	0.0807	0.56763	-4.7211	CXCL19	interleukin-8-like
s2f_0005455006	-1.0939	1.6607	-4.4619	0.0011816	0.078498	-0.65597	PDE6GA	retinal rod rhodopsin-sensitive cgmp 3',5'-cyclic phosphodiesterase subunit gamma-like
s2f_0000258011	-1.0938	-0.79937	-1.6925	0.1211	0.64858	-5.0815	FGF2	fibroblast growth factor 2
s2f_0001330004	-1.0938	-1.2455	-1.256	0.23737	0.7511	-5.6438	BEST2	bestrophin-2
s2f_0000656011	-1.0935	-0.75816	-1.7092	0.11788	0.64433	-5.058	s2f_0000656011	olfactory receptor 52d1-like
s2f_0001075008	-1.0929	-1.209	-1.5654	0.14825	0.68057	-5.256	DUSP3	dual specificity protein phosphatase 3
s2f_0000052033	-1.092	8.7279	-5.956	0.00013429	0.023592	1.459	SERPINA1	alpha-1-antitrypsin homolog
s2f_0024737001	1.0911	-2.0472	1.841	0.095134	0.60155	-4.8687	s2f_0024737001	serine/threonine-protein kinase wnk1-like
s2f_0002591010	1.0907	1.8232	3.3024	0.0078714	0.20954	-2.5141	ZGC:122993	gtpase imap family member 7-like
s2f_0004251001	1.0902	-0.52127	1.4206	0.18555	0.72202	-5.4445	SI:CH211-209A2.2	l-asparaginase
s2f_0001429001	1.0902	-3.3567	1.4017	0.19097	0.72751	-5.4682	SLC18A1	chromaffin granule amine transporter
s2f_0000277096	1.0902	-3.498	1.2441	0.24156	0.75123	-5.6576	s2f_0000277096	gastrula zinc finger protein xlcgf57.1-like
s2f_0018754001	-1.09	-0.81059	-2.5407	0.02911	0.39078	-3.7745	GP1BA	platelet glycoprotein ib alpha chain-like
s2f_0012328001	-1.0894	6.8682	-3.8835	0.0029826	0.13292	-1.5646	APOC1	apolipoprotein c-i
s2f_0002075001	-1.0891	0.25496	-1.334	0.2115	0.73626	-5.5515	ARHGAP30	rho gtpase-activating protein 30 isoform x1
s2f_0006044003	-1.0889	-1.1314	-1.9523	0.079144	0.56348	-4.7035	GPR26	g-protein coupled receptor 26-like
s2f_0004039002	-1.0854	2.7843	-3.3668	0.0070574	0.19932	-2.4077	FDXR	nadph:adrenodoxin oxidoreductase, mitochondrial
s2f_0012399001	-1.0846	5.8223	-5.2746	0.00034806	0.040647	0.53826	APOM	apolipoprotein m
s2f_0006639012	1.0831	-1.2319	2.2406	0.04869	0.47077	-4.2579	s2f_0006639012	median body protein-like
s2f_0335908001	1.0831	-1.9521	1.7448	0.11131	0.63575	-5.0077	SI:CH73-223F5.1	golgin subfamily a member 6-like protein 22
s2f_0000046012	-1.0827	2.4273	-3.7368	0.0037974	0.14896	-1.8014	DRD4B	d(4) dopamine receptor-like
s2f_0009139004	-1.0825	-3.5875	-1.1097	0.29285	0.77013	-5.806	IFNPHI4	interferon a3-like
s2f_0042963001	1.0822	-0.76476	1.8343	0.096189	0.60464	-4.8785	SI:CH211-217K17.10	protein son-like
s2f_0000344024	-1.0814	0.079267	-2.0859	0.06328	0.52256	-4.4999	CCL19A.1	c-c motif chemokine 19-like
s2f_0335859001	1.0788	3.8891	3.7819	0.0035243	0.14603	-1.7283	s2f_0335859001	mucin-1-like
s2f_0003999003	-1.0759	3.1247	-5.7126	0.00018729	0.027447	1.1387	ANKRD33	photoreceptor ankyrin repeat protein
s2f_0027449001	-1.0752	2.5216	-1.6207	0.13583	0.66368	-5.181	SI:CH73-362M14.2	nhs-like protein 2
s2f_0041595001	1.0752	-2.6242	1.0333	0.32555	0.77568	-5.8844	s2f_0041595001	transmembrane protein 100-like
s2f_0008339001	-1.0748	3.1168	-3.3373	0.0074188	0.20246	-2.4564	CUNH4ORF33	upf0462 protein c4orf33 homolog
s2f_0000914004	-1.0739	3.7313	-3.5521	0.0051653	0.17196	-2.1027	EHHADH	peroxisomal bifunctional enzyme
s2f_0004343002	-1.0706	3.3034	-3.0497	0.012116	0.25732	-2.9333	DHCR24	delta(24)-sterol reductase
s2f_0003664005	-1.0699	-4.1189	-1.8578	0.092533	0.59243	-4.844	s2f_0003664005	--
s2f_0001098004	-1.0699	-4.1189	-1.7695	0.10692	0.62709	-4.9723	NAP1L1	nucleosome assembly protein 1-like 1 isoform x1
s2f_0009666001	-1.0699	-2.6814	-1.633	0.1332	0.66068	-5.1642	s2f_0009666001	uncharacterized protein loc107690489
s2f_0034072001	-1.0699	-3.3971	-1.4208	0.18548	0.72202	-5.4442	s2f_0034072001	myosin heavy chain, fast skeletal muscle-like
s2f_0006575004	-1.0699	-3.3567	-1.4092	0.1888	0.72474	-5.4588	BMP15	bone morphogenetic protein 15
s2f_0000502004	-1.0699	-3.5292	-1.361	0.20309	0.73166	-5.5186	SKY1	hypothetical protein
s2f_0088770001	-1.0699	-3.3971	-1.2508	0.23919	0.7511	-5.6499	s2f_0088770001	low quality protein: zinc finger protein 271-like
s2f_0023386001	-1.0699	-3.5906	-1.2428	0.24199	0.75123	-5.659	NITR10	novel immune-type receptor 10
s2f_0007189004	-1.0699	-2.7876	-1.0189	0.33204	0.77577	-5.8988	IL19L	interleukin-20-like
s2f_0174660001	-1.0699	-2.9829	-0.95751	0.36065	0.78831	-5.9578	s2f_0174660001	receptor-type tyrosine-protein phosphatase delta-like
s2f_0000223015	1.0681	6.9784	4.2153	0.001744	0.098372	-1.0379	GSTO1	glutathione s-transferase omega-1-like
s2f_0000276010	1.0676	4.1084	5.2654	0.00035273	0.040873	0.5253	H1-3	histone h1-like
s2f_0002542002	-1.067	3.9118	-4.3118	0.001496	0.090247	-0.88742	TTR	transthyretin
s2f_0006740001	1.066	-0.055391	1.9132	0.084446	0.57603	-4.762	CFAP299	uncharacterized protein c4orf22 homolog
s2f_0001216010	-1.0655	-1.8983	-1.2624	0.23515	0.75066	-5.6364	s2f_0001216010	adenosine receptor a1-like
s2f_0000216020	-1.0654	0.31655	-3.303	0.0078635	0.20954	-2.5132	TLR8	toll-like receptor 8
s2f_0335827001	-1.0651	-1.3911	-0.93535	0.37142	0.79348	-5.9784	s2f_0335827001	mucin-2-like
s2f_0138521001	-1.0646	-0.12067	-2.2919	0.044613	0.4595	-4.1764	SI:DKEY-6F10.5	coiled-coil domain-containing protein 106-like isoform x1
s2f_0003111003	-1.0639	-1.4682	-1.3146	0.21771	0.73924	-5.5749	TANC2	protein tanc2 isoform x1
s2f_0036555001	1.0631	-0.27444	2.4485	0.034114	0.41768	-3.9246	s2f_0036555001	ras-related protein rab-39b-like
s2f_0129255001	1.0624	-2.0123	1.1259	0.28624	0.76794	-5.7888	IL4	interleukin-4 precursor
s2f_0000616008	-1.0617	3.6123	-6.5743	5.9762e-05	0.015948	2.2315	NSDHL	sterol-4-alpha-carboxylate 3-dehydrogenase, decarboxylating
s2f_0003028005	1.0613	-0.6129	1.5861	0.14349	0.67413	-5.2281	TRHR3	thyrotropin-releasing hormone receptor-like
s2f_0000968003	1.0611	5.9505	5.2226	0.0003753	0.042825	0.46498	SI:DKEY-251I10.2	putative defense protein 3
s2f_0000197008	1.0604	6.5356	4.2538	0.0016402	0.09503	-0.97773	ZGC:136872	calpain-1 catalytic subunit-like
s2f_0104204001	-1.0601	-1.1329	-1.6037	0.13954	0.66709	-5.2042	s2f_0104204001	uncharacterized protein loc113040258 isoform x1
s2f_0000710005	1.0595	0.72093	4.7707	0.00073438	0.061672	-0.19012	SIM2	single-minded homolog 2
s2f_0001614007	-1.0587	0.31301	-2.0551	0.066639	0.52948	-4.5472	PCSK9	proprotein convertase subtilisin/kexin type 9
s2f_0001222003	-1.0586	-0.35849	-1.8798	0.089245	0.58665	-4.8116	TCTEX1D1	tctex1 domain-containing protein 1
s2f_0021896001	1.0579	0.066118	2.457	0.033619	0.41491	-3.9108	TAS2R1	taste receptor type 2 member 40-like
s2f_0006403001	-1.0558	4.7471	-5.1217	0.0004349	0.046769	0.32146	IRG1L	cis-aconitate decarboxylase-like
s2f_0007297002	1.0558	-0.26326	2.2791	0.045596	0.46326	-4.1968	SI:DKEY-11O15.10	zinc finger and scan domain-containing protein 29-like
s2f_0035518001	1.0557	-0.99675	1.5153	0.16034	0.69527	-5.3225	s2f_0035518001	uncharacterized loc102804444
s2f_0000533006	-1.0544	4.9149	-4.6245	0.0009183	0.068365	-0.40891	ENPP7	ectonucleotide pyrophosphatase/phosphodiesterase family member 7-like
s2f_0000607003	-1.0541	-0.93751	-2.6665	0.023437	0.35599	-3.5682	SI:DKEY-13A21.4	hypothetical protein
s2f_0000445001	1.054	6.838	3.4736	0.0058923	0.18473	-2.2315	PTGR1	prostaglandin reductase 1-like
s2f_0005018001	1.054	-0.29208	2.3558	0.039996	0.44253	-4.0742	HDAC11	histone deacetylase 11
s2f_0000274001	-1.0539	2.0089	-4.4196	0.0012624	0.081692	-0.72089	SLC7A9	b(0,+)-type amino acid transporter 1
s2f_0000359019	-1.0539	7.5928	-4.2155	0.0017434	0.098372	-1.0376	RBP2	retinol-binding protein 2
s2f_0006660002	-1.0531	3.252	-6.398	7.4896e-05	0.017224	2.0173	ROS1	proto-oncogene tyrosine-protein kinase ros
s2f_0000949011	-1.0529	-0.0405	-1.8369	0.095775	0.60356	-4.8747	CCN5	wnt1-inducible-signaling pathway protein 2
s2f_0005488004	-1.0525	-0.048044	-3.5193	0.0054568	0.17628	-2.1564	NR0B2	nuclear receptor subfamily 0 group b member 2
s2f_0009707002	-1.0513	-2.6317	-1.1637	0.27128	0.76139	-5.7479	STYXL1	serine/threonine/tyrosine-interacting-like protein 1
s2f_0005305004	-1.0505	0.15785	-3.6467	0.0044103	0.16238	-1.948	SI:CH211-213O11.11	probable g-protein coupled receptor
s2f_0000929008	-1.0504	1.9358	-1.5053	0.16285	0.6987	-5.3356	EGFLAM	pikachurin isoform x1
s2f_0009469002	1.05	3.0975	2.4569	0.033625	0.41491	-3.911	G0S2	g0/g1 switch protein 2-like
s2f_0003028003	-1.0482	-0.89506	-1.3929	0.19354	0.72831	-5.4792	TRHR2	thyrotropin-releasing hormone receptor-like
s2f_0000656064	1.0473	-3.0613	1.5138	0.16071	0.69532	-5.3245	OR126-1	olfactory receptor 1d2-like
s2f_0000542008	1.0473	-4.1087	1.3852	0.19582	0.72845	-5.4888	SCN4A	sodium channel protein type 4 subunit alpha
s2f_0002845005	-1.047	-0.03888	-1.3186	0.21641	0.73924	-5.57	ANKRD63	ankyrin repeat domain-containing protein 63
s2f_0001077010	1.0467	5.1738	5.0858	0.00045847	0.047862	0.27002	RNF225	ring finger protein 225
s2f_0000151018	-1.0467	-1.9304	-1.059	0.31426	0.77365	-5.8586	CNTD2	cyclin n-terminal domain-containing protein 2
s2f_0000193007	-1.0464	6.6785	-5.0773	0.00046427	0.047862	0.25777	UCP1	mitochondrial brown fat uncoupling protein 1
s2f_0000653007	-1.0448	-1.5818	-1.3119	0.21859	0.7394	-5.5781	LTBR	tumor necrosis factor receptor superfamily member 5-like
s2f_0004681006	1.0447	-0.18626	3.2528	0.0085633	0.21732	-2.5962	SI:DKEY-283B1.7	von willebrand factor c domain-containing protein 2-like
s2f_0000922009	1.0443	7.1	5.8684	0.00015123	0.023922	1.3448	SI:CH211-195B11.3	trypsin inhibitor clti-1-like
s2f_0000943006	-1.0437	3.0376	-6.5371	6.2653e-05	0.015948	2.1868	LSS	lanosterol synthase
s2f_0335930001	1.0431	3.2724	2.9931	0.013353	0.26919	-3.0274	SI:DKEY-7C18.24	uncharacterized protein loc562950
s2f_0000009063	1.043	-0.0010527	1.7777	0.10551	0.62422	-4.9606	HCK	tyrosine-protein kinase hck
s2f_0004748003	-1.0418	2.3985	-2.3819	0.038247	0.43555	-4.0323	ZBTB7A	zinc finger and btb domain-containing protein 7a
s2f_0000583001	-1.0416	-1.717	-1.3937	0.19328	0.72831	-5.4781	EPB42	erythrocyte membrane protein band 4.2
s2f_0001920013	-1.0416	-3.16	-1.1737	0.26743	0.76116	-5.7369	REPIN1	oocyte zinc finger protein xlcof6-like
s2f_0009218002	-1.0416	-3.2005	-0.99276	0.344	0.78021	-5.9243	SHOC1	protein shortage in chiasmata 1 ortholog
s2f_0517685001	1.0408	-1.8119	0.94187	0.36823	0.79221	-5.9724	s2f_0517685001	uncharacterized loc106577407
s2f_0002194006	1.0408	-1.2932	0.82826	0.42665	0.81368	-6.0721	ZBTB42	zinc finger and btb domain-containing protein 18.2-like
s2f_0004566002	-1.0398	1.4001	-3.269	0.0083308	0.21545	-2.5694	OGG1	n-glycosylase/dna lyase
s2f_0000359015	-1.0395	1.9028	-2.2914	0.044651	0.4595	-4.1772	FABP4B	fatty acid-binding protein, adipocyte-like
s2f_0010676001	1.0388	1.6326	3.3008	0.0078919	0.20954	-2.5167	VSTM5	v-set and transmembrane domain-containing protein 5
s2f_0003009003	-1.0381	-1.9953	-1.386	0.19558	0.72845	-5.4878	GPRC5A	g-protein coupled receptor family c group 5 member d-like
s2f_0022274001	-1.0366	-0.35463	-2.7015	0.022065	0.34537	-3.5106	SI:CH211-119E14.1	uncharacterized protein si:ch211-119e14.1
s2f_0007600003	-1.0365	-0.63368	-2.1931	0.052788	0.48744	-4.3328	PDCD1LG2	programmed cell death 1 ligand 2
s2f_0008593001	1.0347	-1.8677	1.4543	0.17622	0.71198	-5.4017	REC8	meiotic recombination protein rec8 homolog
s2f_0003701002	1.0347	-3.3628	0.98141	0.3493	0.78229	-5.9352	PRRT1B	proline rich transmembrane protein 1b
s2f_0020001001	1.0347	-2.7339	0.8003	0.44195	0.82015	-6.0949	s2f_0020001001	claudin-4-like
s2f_0000375005	1.0347	-3.0948	0.73744	0.47763	0.83231	-6.1437	KPNA7	importin subunit alpha-8
s2f_0000895010	1.0341	-1.5821	1.3766	0.19836	0.72944	-5.4994	S1PR4	sphingosine 1-phosphate receptor 4
s2f_0003550002	-1.0338	4.1605	-3.7215	0.0038945	0.1516	-1.8262	UPB1	beta-ureidopropionase
s2f_0013170001	-1.0336	-2.012	-0.9341	0.37204	0.79381	-5.9796	ZFP41	zinc finger protein 41 homolog
s2f_0000052018	-1.0329	2.2825	-4.826	0.00067544	0.059044	-0.10829	SERPIND1	heparin cofactor 2
s2f_0002134003	-1.0326	3.2291	-1.2994	0.22266	0.74228	-5.5929	SIPA1	signal-induced proliferation-associated protein 1
s2f_0000009018	-1.0322	1.0985	-4.2715	0.0015946	0.093296	-0.95008	ITK	tyrosine-protein kinase itk/tsk
s2f_0004323003	-1.032	-0.4919	-1.0102	0.33596	0.77671	-5.9073	SAMD12	sterile alpha motif domain-containing protein 12 isoform x1
s2f_0335852001	-1.0316	-0.97955	-1.009	0.33653	0.7775	-5.9085	s2f_0335852001	ribosome-binding protein 1-like
s2f_0004580004	1.0313	0.089422	2.257	0.047349	0.46795	-4.2319	TDRD15	tudor domain-containing protein 15
s2f_0002267025	-1.0309	-1.6702	-1.7478	0.11077	0.63505	-5.0034	OR116-2	olfactory receptor 52b2-like
s2f_0007862002	1.0303	-1.0756	3.0687	0.011728	0.25458	-2.9018	CYB5D1	cytochrome b5 domain-containing protein 1
s2f_0006179015	1.0302	-2.6125	1.1235	0.28719	0.76794	-5.7913	s2f_0006179015	lymphocyte antigen 6b-like
s2f_0001587001	-1.0284	1.422	-1.6249	0.13492	0.66213	-5.1753	ACER3	alkaline ceramidase 3
s2f_0014795001	-1.028	-0.86073	-1.5236	0.15828	0.69342	-5.3116	CUNH16ORF71	uncharacterized protein c16orf71 homolog
s2f_0000061013	1.0268	3.4392	3.5695	0.0050169	0.17012	-2.0742	DDX43	probable atp-dependent rna helicase ddx43
s2f_0016196001	-1.0266	-2.1369	-1.2427	0.24203	0.75123	-5.6592	s2f_0016196001	scavenger receptor cysteine-rich type 1 protein m130-like
s2f_0000047017	1.0261	-1.3791	1.7548	0.10951	0.63176	-4.9934	NLRP12	protein nlrc3-like
s2f_0006018001	-1.0255	1.7896	-3.8824	0.0029878	0.13292	-1.5663	C2	complement c2
s2f_0010337001	-1.0232	0.30113	-2.6467	0.02425	0.35926	-3.6008	UNC93B1	protein unc-93 homolog b1
s2f_0011732001	1.0231	2.2883	3.7815	0.0035267	0.14603	-1.7289	NPFF	pro-fmrfamide-related neuropeptide ff
s2f_0003770003	-1.0231	3.4756	-1.2184	0.25077	0.75444	-5.687	NOL4L	nucleolar protein 4-like
s2f_0000809006	-1.023	-2.9083	-1.5652	0.14829	0.68057	-5.2562	RPS27	40s ribosomal protein s27
s2f_0003205003	-1.0217	-1.0949	-1.5682	0.14759	0.68057	-5.2522	SPEF1	sperm flagellar protein 1-like
s2f_0010369001	1.0213	1.3287	3.6875	0.0041205	0.15579	-1.8815	GDF15	growth/differentiation factor 15
s2f_0000469011	-1.019	0.28009	-2.7333	0.020885	0.33374	-3.458	TRPC2	short transient receptor potential channel 2-like
s2f_0002420003	-1.0186	-0.42951	-0.95675	0.36102	0.78831	-5.9585	ONECUT2	one cut domain family member 2
s2f_0006734001	-1.018	2.7751	-3.8503	0.0031492	0.13645	-1.6179	CDHR5	cadherin-related family member 5
s2f_0012272001	-1.016	1.9689	-4.2438	0.0016665	0.095445	-0.99335	LRRC15	leucine-rich repeat-containing protein 15
s2f_0006895001	-1.0149	0.24753	-2.1694	0.054946	0.49597	-4.3699	EDA	ectodysplasin-a isoform x1
s2f_0024437001	-1.0134	1.0795	-2.5506	0.028617	0.38929	-3.7583	SC:D0261	uncharacterized protein loc100327252 precursor
s2f_0006957003	-1.0111	-0.43721	-0.97229	0.3536	0.7844	-5.9439	NOD1	nucleotide-binding oligomerization domain-containing protein 1 isoform x1
s2f_0017011001	-1.0105	2.3758	-1.552	0.15139	0.6835	-5.2739	s2f_0017011001	mucin-5ac-like isoform x1
s2f_0000046047	-1.0102	-0.42699	-1.2691	0.23284	0.75066	-5.6285	ADRA1AA	alpha-1a adrenergic receptor-like
s2f_0000716004	-1.0091	3.7721	-5.6183	0.00021356	0.029835	1.0119	DGAT2	diacylglycerol o-acyltransferase 2
s2f_0031429001	-1.0086	0.12326	-1.5331	0.15594	0.69067	-5.299	DRL	gastrula zinc finger protein xlcgf49.1-like
s2f_0000901005	-1.0081	1.9358	-4.9879	0.00052995	0.052117	0.12869	SLC5A11	sodium/myo-inositol cotransporter 2
s2f_0000009046	-1.0067	-1.5105	-1.9884	0.074525	0.54958	-4.6491	ZAP70	tyrosine-protein kinase zap-70
s2f_0000210040	1.0064	-3.2095	2.5851	0.026969	0.37991	-3.702	BT1A1	butyrophilin subfamily 2 member a1-like
s2f_0003399002	1.0064	-4.1097	2.0645	0.065597	0.52694	-4.5328	EIF4EBP1	eukaryotic translation initiation factor 4e-binding protein 1
s2f_0000067006	1.0064	-2.4209	1.783	0.1046	0.62413	-4.953	BMA-BED-3	zinc finger bed domain-containing protein 4-like
s2f_0002019001	1.0064	-4.1097	1.6515	0.12932	0.65551	-5.1386	RPS29	40s ribosomal protein s29
s2f_0335889001	1.0064	-4.0483	1.6093	0.13832	0.6666	-5.1966	s2f_0335889001	gastrula zinc finger protein xlcgf49.1-like
s2f_0008412001	1.0064	-4.1189	1.5965	0.14114	0.67084	-5.214	PCM1	pericentriolar material 1 protein isoform x1
s2f_0003441001	1.0064	-3.5906	1.5932	0.14188	0.67243	-5.2185	CSN2	cop9 signalosome complex subunit 2
s2f_0000980004	1.0064	-2.4678	1.5672	0.14783	0.68057	-5.2536	s2f_0000980004	low quality protein: uncharacterized protein loc116309088
s2f_0000227012	1.0064	-4.1097	1.5405	0.15414	0.68778	-5.2891	UBE2D2	ubiquitin-conjugating enzyme e2 d2
s2f_0002825003	1.0064	-3.5814	1.4713	0.17164	0.70686	-5.3797	APP	amyloid-beta precursor protein isoform x1
s2f_0433253001	1.0064	-4.272	1.4712	0.17169	0.70686	-5.38	s2f_0433253001	mucin-5ac-like
s2f_0022276001	1.0064	-4.0483	1.4136	0.18754	0.72437	-5.4533	BNCR	protein bouncer-like
s2f_0006148004	1.0064	-3.8214	1.3963	0.19254	0.72831	-5.475	RIPPLY2	protein ripply2
s2f_0217689001	1.0064	-2.9395	1.3859	0.19559	0.72845	-5.4878	s2f_0217689001	ribonuclease inhibitor-like isoform x1
s2f_0002156002	1.0064	-4.0483	1.3805	0.19719	0.72942	-5.4945	RPL15	60s ribosomal protein l15
s2f_0000086019	1.0064	-3.7227	1.3739	0.19916	0.72944	-5.5027	FPR1	hypothetical protein
s2f_0009139006	1.0064	-3.7529	1.3735	0.19931	0.72944	-5.5033	IFNPHI1	interferon a3-like isoform x1
s2f_0041998001	1.0064	-3.7841	1.3069	0.22022	0.74055	-5.5841	s2f_0041998001	uncharacterized loc108257523
s2f_0000318020	1.0064	-3.9254	1.2892	0.22605	0.74385	-5.605	FAT4	protocadherin fat 4
s2f_0000055021	1.0064	-3.9869	1.2821	0.22845	0.74637	-5.6134	s2f_0000055021	histone h2a type 1-like
s2f_0000007001	1.0064	-3.5875	1.2613	0.23552	0.75066	-5.6376	HSD17B1	estradiol 17-beta-dehydrogenase 1
s2f_0000063018	1.0064	-3.519	1.2374	0.24392	0.75162	-5.6653	KCNA1	potassium voltage-gated channel subfamily a member 1
s2f_0000042019	1.0064	-3.76	1.2333	0.24537	0.75238	-5.6699	LJ0G3V0173169.1	zinc finger mym-type protein 1-like
s2f_0095541001	1.0064	-4.1804	1.203	0.25642	0.7563	-5.7043	s2f_0095541001	uncharacterized protein loc102079366 isoform x1
s2f_0000277041	1.0064	-3.6613	1.1172	0.28976	0.76949	-5.798	s2f_0000277041	gastrula zinc finger protein xlcgf57.1-like
s2f_0062365001	1.0064	-3.4576	1.0796	0.30541	0.77236	-5.8374	s2f_0062365001	utrophin-like
s2f_0335924001	1.0064	-2.9697	1.0363	0.32423	0.77568	-5.8815	ZGC:194114	uncharacterized protein loc100005599
s2f_0000166001	1.0064	-3.0404	1.0319	0.3262	0.77568	-5.8859	PSMC2	26s proteasome regulatory subunit 7
s2f_0008805035	1.0064	-3.2581	1.029	0.32749	0.77568	-5.8888	s2f_0008805035	junctional adhesion molecule c-like isoform x1
s2f_0000047023	1.0058	-1.5726	2.0617	0.065908	0.52797	-4.5371	s2f_0000047023	protein nlrc3-like
s2f_0000131002	-1.0053	0.77788	-2.2697	0.04633	0.46573	-4.2116	LAMB3	laminin subunit beta-3
s2f_0005447003	1.0053	-0.96947	1.6448	0.13071	0.65824	-5.1479	CARTPT	cocaine- and amphetamine-regulated transcript protein-like
s2f_0101181001	1.0052	6.8536	3.4684	0.0059445	0.18522	-2.2401	ZGC:193505	glycine-rich protein 5-like
s2f_0005158004	-1.0015	-1.4442	-1.7869	0.10394	0.62354	-4.9473	TMEM170B	transmembrane protein 170b
s2f_0001124003	-1.0011	0.0060288	-2.5535	0.028476	0.3886	-3.7536	CHRM5	muscarinic acetylcholine receptor m5-like
s2f_0001163001	-1.0011	-1.9363	-2.4928	0.031609	0.40391	-3.8526	RAD21L1	double-strand-break repair protein rad21-like protein 1
s2f_0138531001	-1.0011	-1.1191	-1.3147	0.21768	0.73924	-5.5747	s2f_0138531001	uncharacterized protein loc101883776
s2f_0000124020	-1.0011	-3.506	-1.0886	0.30161	0.77104	-5.8281	DNF1	hypothetical protein
s2f_0000028014	0.99862	-1.0008	2.0829	0.063604	0.52354	-4.5045	GSC2	homeobox protein goosecoid-2
s2f_0042000001	-0.99857	-0.4665	-1.9856	0.074866	0.55047	-4.6532	CXCL20	c-x-c motif chemokine 10-like
s2f_0009465001	-0.99809	-1.0197	-1.3876	0.19509	0.72845	-5.4858	HRH1	histamine h1 receptor
s2f_0003426003	-0.99798	0.85762	-0.97394	0.35282	0.78416	-5.9423	GIPC1	pdz domain-containing protein gipc1
s2f_0010368001	-0.99733	-0.73968	-0.7217	0.48684	0.83542	-6.1554	VSTM2A	v-set and transmembrane domain-containing protein 2a isoform x1
s2f_0002211002	-0.99655	5.699	-7.0567	3.2869e-05	0.011426	2.7944	HMGCS1	hydroxymethylglutaryl-coa synthase, cytoplasmic
s2f_0070079001	-0.99558	-0.28262	-2.2203	0.050401	0.47865	-4.2899	s2f_0070079001	wall-associated receptor kinase 2-like isoform x1
s2f_0006087003	0.99443	4.2858	7.323	2.3916e-05	0.0091665	3.0908	VGLL4L	transcription cofactor vestigial-like protein 4
s2f_0008316001	-0.99395	5.2481	-1.2196	0.25032	0.75408	-5.6856	BSNA	protein bassoon-like
s2f_0000689007	-0.99336	1.0363	-3.2496	0.0086097	0.21813	-2.6015	PPP1R3B	protein phosphatase 1 regulatory subunit 3b
s2f_0010460001	-0.99321	-0.79031	-1.1731	0.26765	0.76135	-5.7375	DBNDD1	dysbindin domain-containing protein 1
s2f_0015114001	-0.99249	1.1789	-1.7902	0.10338	0.62273	-4.9425	s2f_0015114001	protocadherin gamma-a7-like
s2f_0005366001	-0.99204	1.5365	-2.1144	0.060305	0.51623	-4.4557	ERG28	probable ergosterol biosynthetic protein 28
s2f_0002737006	0.99171	5.573	3.244	0.0086928	0.2191	-2.6108	NR4A3	nuclear receptor subfamily 4 group a member 3 isoform x1
s2f_0335831001	-0.99074	4.3975	-2.7392	0.020674	0.33197	-3.4482	ZMP:0000000906	probable serine/threonine-protein kinase kinx
s2f_0028633001	0.98948	-1.9867	0.70052	0.49941	0.83791	-6.1707	s2f_0028633001	a-kinase anchor protein 13-like
s2f_0000088017	0.98919	1.9129	2.8714	0.016462	0.29364	-3.2294	SP6	transcription factor sp6
s2f_0009878007	-0.98893	-1.5755	-2.7024	0.022029	0.34516	-3.509	s2f_0009878007	g2/m phase-specific e3 ubiquitin-protein ligase-like
s2f_0014422001	-0.988	1.0706	-1.0848	0.30321	0.77104	-5.832	SI:CH211-250C4.3	uncharacterized protein si:ch211-250c4.3
s2f_0000066013	0.98799	3.742	5.7581	0.0001759	0.02635	1.1993	RABGAP1L	rab gtpase-activating protein 1-like isoform x1
s2f_0000059022	-0.9879	3.3636	-5.1341	0.00042706	0.046259	0.33919	ASGRL1	c-type lectin domain family 10 member a-like
s2f_0000218046	-0.98603	-2.62	-1.6175	0.13652	0.6648	-5.1854	IRAK1	interleukin-1 receptor-associated kinase 1 isoform x1
s2f_0007880003	-0.98603	-4.272	-1.4717	0.17153	0.70686	-5.3792	ACCB	propionyl-coa carboxylase alpha chain, mitochondrial-like
s2f_0004437001	-0.98603	-4.272	-1.4445	0.17887	0.71428	-5.4141	CAPRIN1	caprin-1
s2f_0019611001	-0.98603	-2.2641	-1.4295	0.18305	0.71873	-5.4333	INSL3	relaxin-3-like
s2f_0133451001	-0.98603	-2.0914	-1.3788	0.19772	0.72942	-5.4967	SI:CH211-59P23.1	(genbank) unnamed protein product
s2f_0010842001	-0.98603	-1.6268	-1.3473	0.20732	0.73397	-5.5354	STMND1	stathmin domain-containing protein 1
s2f_0001470008	-0.98603	-3.6581	-1.3455	0.20789	0.73412	-5.5376	DLG2	disks large homolog 2 isoform x1
s2f_0000166010	-0.98603	-3.7529	-1.3451	0.20799	0.73412	-5.538	PSMC4	hypothetical protein
s2f_0005195006	-0.98603	-3.4273	-1.2825	0.22831	0.74626	-5.6129	BATF	basic leucine zipper transcriptional factor atf-like
s2f_0091318001	-0.98603	-2.8771	-1.2608	0.23571	0.75066	-5.6383	s2f_0091318001	uncharacterized protein loc107565019
s2f_0000000015	-0.98603	-2.9977	-1.21	0.25382	0.75497	-5.6964	s2f_0000000015	--
s2f_0007488014	-0.98603	-3.8757	-1.147	0.27783	0.76468	-5.7661	NITR10A	novel immune-type receptor 10a precursor
s2f_0058418001	-0.98603	-4.038	-1.1453	0.27849	0.76501	-5.7679	s2f_0058418001	(genbank) unnamed protein product
s2f_0056131001	-0.98603	-3.5097	-1.1179	0.2895	0.76949	-5.7973	SI:DKEY-211G8.8	--
s2f_0077063001	-0.98603	-1.0344	-1.0698	0.30959	0.77284	-5.8475	s2f_0077063001	transcription factor sox-6-like
s2f_0133026001	-0.98603	-3.885	-1.0559	0.3156	0.77385	-5.8617	s2f_0133026001	nebulin-like
s2f_0001937001	-0.98603	-3.6301	-1.0227	0.33031	0.77568	-5.895	RPL6	hypothetical protein
s2f_0000711007	0.98539	7.8021	3.6556	0.0043449	0.16116	-1.9334	PGAM2	phosphoglycerate mutase 2
s2f_0000097001	0.98453	0.00030401	2.1007	0.061715	0.5209	-4.4769	INF2	formin-like protein 5
s2f_0001861006	-0.9838	1.1706	-2.9522	0.014327	0.27886	-3.0954	PDZD7	pdz domain-containing protein 7
s2f_0018640001	0.98345	4.8276	4.9423	0.00056723	0.054006	0.06232	CLDN8.2	claudin-8-like
s2f_0002429001	-0.9828	0.24728	-1.4395	0.18025	0.71594	-5.4205	LRRTM4	leucine-rich repeat transmembrane neuronal protein 4-like
s2f_0008760001	-0.98279	1.1468	-3.3293	0.0075196	0.20289	-2.4696	TMEM117	transmembrane protein 117-like
s2f_0017938001	-0.98209	-2.6349	-1.5902	0.14255	0.67325	-5.2225	s2f_0017938001	carboxypeptidase n subunit 2-like
s2f_0000229008	0.98204	-2.2689	1.1807	0.26476	0.7605	-5.7291	CXCR5	c-x-c chemokine receptor type 5
s2f_0004754002	-0.97902	1.5585	-1.6475	0.13016	0.65776	-5.1442	RAB27B	ras-related protein rab-27b
s2f_0002776008	-0.97851	2.1177	-1.5075	0.1623	0.69733	-5.3327	NTF3	neurotrophin-3
s2f_0000151003	0.9781	-1.4078	2.4195	0.035853	0.42602	-3.9715	CCNA1	cyclin-a1
s2f_0007396003	-0.97788	-3.1039	-1.0406	0.32233	0.77568	-5.8772	s2f_0007396003	immunoglobulin iota chain-like
s2f_0000286013	0.97782	5.1959	6.519	6.4118e-05	0.015974	2.1649	P4HA1	prolyl 4-hydroxylase subunit alpha-1 isoform x1
s2f_0007363004	-0.97726	3.4316	-4.1942	0.0018037	0.10098	-1.071	SMIM24	small integral membrane protein 24
s2f_0006030002	0.97688	4.4407	5.0653	0.00047255	0.048052	0.24054	HTATIP2	oxidoreductase htatip2
s2f_0007327002	0.97559	2.1712	4.6295	0.00091133	0.068365	-0.40145	CHRD	chordin
s2f_0003047007	0.97445	-1.7111	1.5545	0.15079	0.6835	-5.2705	s2f_0003047007	cd48 antigen-like
s2f_0000042032	-0.97338	-2.3186	-0.88853	0.39491	0.8005	-6.0205	LJ0G3V0120259.1	zinc finger mym-type protein 1-like
s2f_0001044002	-0.97276	-2.8214	-1.5622	0.14899	0.68128	-5.2603	TATDN2	putative deoxyribonuclease tatdn2
s2f_0018885001	-0.97276	-2.621	-1.0234	0.33	0.77568	-5.8943	s2f_0018885001	junctional adhesion molecule-like isoform x1
s2f_0009752001	-0.97209	3.2033	-3.3721	0.0069935	0.19799	-2.3988	HPXB	hemopexin
s2f_0001905002	-0.97116	6.3801	-4.0986	0.0021027	0.10691	-1.2215	C9	complement component c9
s2f_0000220001	-0.97111	-1.2634	-0.94109	0.36861	0.79236	-5.9731	DNM2	hypothetical protein
s2f_0000705001	0.97065	9.4417	3.4497	0.0061343	0.18675	-2.2708	GSTA.1	glutathione s-transferase 3-like
s2f_0005020001	-0.97063	3.8827	-5.7565	0.00017628	0.02635	1.1972	SAMD7	sterile alpha motif domain-containing protein 7
s2f_0001423005	-0.96985	-0.38177	-0.94555	0.36644	0.79129	-5.969	HPSE2	inactive heparanase-2
s2f_0009798001	-0.96976	3.8871	-4.515	0.0010878	0.074874	-0.57488	CLUL1	clusterin-like protein 1
s2f_0000572004	0.96939	-4.1189	1.581	0.14464	0.67561	-5.235	MOB1	hypothetical protein
s2f_0156022001	0.96939	-3.3567	1.5257	0.15775	0.69254	-5.3087	s2f_0156022001	protein nlrc3-like
s2f_0001840005	0.96939	-3.0776	1.4153	0.18706	0.72364	-5.4512	STMN1	stathmin
s2f_0000944006	0.96939	-3.9254	1.3701	0.20031	0.72944	-5.5074	s2f_0000944006	gastrula zinc finger protein xlcgf17.1-like
s2f_0007187003	0.96939	-3.5999	1.2392	0.24326	0.75144	-5.6632	ERICH6	glutamate-rich protein 6-like
s2f_0000609005	-0.96868	3.368	-6.5334	6.2949e-05	0.015948	2.1823	DPYS	dihydropyrimidinase
s2f_0000767018	0.96847	6.3848	5.8903	0.00014679	0.023822	1.3735	VCAN	versican core protein isoform x1
s2f_0010178001	-0.96776	2.0134	-4.0215	0.0023816	0.11559	-1.3438	ZBTB38	zinc finger and btb domain-containing protein 38
s2f_0000746007	-0.9655	0.74014	-1.3226	0.21512	0.73924	-5.5652	LIN28B	protein lin-28 homolog b
s2f_0007672002	-0.96531	0.15829	-1.9819	0.075329	0.55138	-4.6588	SPAG17	sperm-associated antigen 17-like
s2f_0000058001	0.96474	9.0753	3.7567	0.003674	0.14896	-1.7691	CP3AR	cytochrome p450 3a27-like
s2f_0335825001	0.96454	0.010497	1.3506	0.20631	0.7332	-5.5314	s2f_0335825001	uncharacterized protein loc110438482
s2f_0000001017	-0.9644	1.8466	-3.9302	0.002763	0.12787	-1.4895	TMPRSS9	transmembrane protease serine 9
s2f_0335895001	0.96163	-0.50055	2.5169	0.030325	0.39524	-3.8133	s2f_0335895001	ribonuclease inhibitor-like
s2f_0010053001	-0.96124	-1.0404	-1.6633	0.1269	0.65223	-5.1223	CUNH17ORF47	(genbank) hypothetical protein
s2f_0004661001	-0.96124	-2.1349	-0.8643	0.40747	0.80463	-6.0416	GPR4	g-protein coupled receptor 4
s2f_0003921004	-0.96096	-0.11637	-2.019	0.070802	0.5391	-4.6025	ARID5A	at-rich interactive domain-containing protein 5a isoform x1
s2f_0004414004	0.96076	-2.0717	1.0748	0.30746	0.77284	-5.8424	TOMT	transmembrane o-methyltransferase
s2f_0008523008	0.96016	0.075556	1.5485	0.15222	0.68453	-5.2785	SI:CH1073-365P7.2	gtpase imap family member 8-like
s2f_0001923002	0.95965	-1.1591	2.5867	0.026892	0.37958	-3.6992	CIB3	calcium and integrin-binding family member 3
s2f_0001906005	-0.95959	1.1043	-1.6521	0.1292	0.65551	-5.1378	RHBDL1	rhomboid-related protein 1 isoform x1
s2f_0001165005	0.95874	-1.0856	1.7695	0.10693	0.62709	-4.9723	BM9838	alanine aminotransferase 1
s2f_0000680013	0.95827	-2.2237	0.84367	0.41838	0.80988	-6.0592	AGABI2DRAFT_120195	hypothetical protein
s2f_0001013003	-0.95779	-0.75123	-2.9892	0.013444	0.26966	-3.0339	METK	hypothetical protein
s2f_0089497001	-0.95773	-2.2733	-1.5898	0.14264	0.67325	-5.2231	s2f_0089497001	zinc finger protein 2 homolog
s2f_0000492001	-0.95773	-2.6722	-1.2474	0.2404	0.7511	-5.6538	HBB	hemoglobin subunit beta-like
s2f_0000000016	-0.95773	-2.2038	-1.1341	0.28294	0.76731	-5.78	s2f_0000000016	uncharacterized protein k02a2.6-like
s2f_0000990002	-0.95773	-3.1353	-1.0297	0.32717	0.77568	-5.888	RFX6	dna-binding protein rfx6
s2f_0000099011	-0.95773	-3.6372	-0.9769	0.35143	0.78335	-5.9395	ZGC:92591	late histone h2b.l4-like
s2f_0014457001	-0.95773	-0.94211	-0.89078	0.39376	0.8005	-6.0186	s2f_0014457001	zinc finger protein 239-like
s2f_0006005042	-0.95773	-2.3556	-0.8518	0.41405	0.80873	-6.0523	s2f_0006005042	zinc finger protein 239-like
s2f_0008524004	-0.9576	2.3399	-2.6042	0.026095	0.37408	-3.6706	SI:DKEY-219E21.2	e3 ubiquitin-protein ligase trim39-like
s2f_0000164002	-0.95743	4.1614	-1.3629	0.2025	0.73139	-5.5162	ADAM22	disintegrin and metalloproteinase domain-containing protein 22 isoform x1
s2f_0013118001	-0.95699	1.7539	-4.858	0.00064363	0.057611	-0.061138	SYT18B	synaptotagmin-5-like
s2f_0003568001	-0.95611	2.0632	-2.436	0.034851	0.42114	-3.9448	XYLB	xylulose kinase isoform x1
s2f_0476464001	-0.95508	-1.4986	-1.471	0.17173	0.70686	-5.3801	s2f_0476464001	uncharacterized protein loc114569092
s2f_0011929001	0.95406	-1.3027	1.2154	0.25186	0.75444	-5.6904	CUNHXORF58	putative uncharacterized protein cxorf58 homolog
s2f_0003844007	0.95261	-1.7197	2.6493	0.024141	0.35926	-3.5964	RAMP3	receptor activity-modifying protein 3
s2f_0000118006	-0.95256	-1.1126	-1.3111	0.21883	0.73989	-5.579	PRLH2R	prolactin-releasing peptide receptor-like
s2f_0001335003	0.95191	5.7867	6.9293	3.8382e-05	0.012347	2.6491	HEBP2	heme-binding protein 2
s2f_0006962003	0.95063	5.4426	3.4502	0.0061297	0.18675	-2.2701	TPMT	probable thiopurine s-methyltransferase isoform x1
s2f_0011734001	-0.95063	0.068655	-1.9757	0.07612	0.55281	-4.6683	ITPRIPL2	inositol 1,4,5-trisphosphate receptor-interacting protein-like 2
s2f_0000025018	-0.94965	-0.86356	-1.031	0.32659	0.77568	-5.8867	INO80	hypothetical protein
s2f_0000419018	-0.94865	3.8061	-5.0908	0.00045509	0.047862	0.27724	CD109	cd109 antigen-like
s2f_0000028012	0.94755	2.9614	4.9798	0.00053634	0.0524	0.117	GSC	homeobox protein goosecoid
s2f_0000231025	0.94717	6.0477	5.321	0.00032554	0.039478	0.6033	HER4.1	transcription factor hes-5-like
s2f_0010092001	0.94709	0.59179	2.5028	0.031074	0.40042	-3.8364	CUNH11ORF53	uncharacterized protein c11orf53 homolog
s2f_0004545003	-0.94642	8.9977	-3.4756	0.0058725	0.18473	-2.2282	APOA4	apolipoprotein a-i-like
s2f_0002309001	0.94628	6.2481	4.8335	0.00066783	0.058722	-0.097218	AIFM2	apoptosis-inducing factor 2
s2f_0000046004	-0.94518	1.5824	-3.9271	0.0027771	0.12812	-1.4945	ADRB2A	beta-2 adrenergic receptor-like
s2f_0004859002	-0.94508	-2.4475	-1.4796	0.16946	0.7062	-5.369	CTXN1	cortexin-1-like
s2f_0003628002	-0.94508	-2.1745	-1.3549	0.20497	0.73248	-5.5261	SI:CH73-40A2.1	tyrosine-protein kinase receptor tyro3-like
s2f_0036553001	-0.94508	-2.9804	-1.1253	0.28648	0.76794	-5.7894	s2f_0036553001	histone-lysine n-methyltransferase 2b-like
s2f_0007575016	-0.94508	-3.1804	-0.75538	0.46726	0.82803	-6.1302	SI:CH211-132E22.4	g-protein coupled receptor 4-like
s2f_0014604001	-0.94483	2.154	-1.6942	0.12078	0.64847	-5.0792	s2f_0014604001	hypothetical protein
s2f_0010711001	-0.9445	0.0078389	-2.3766	0.038591	0.43701	-4.0407	ZBTB24	zinc finger and btb domain-containing protein 24 isoform x1
s2f_0001239003	0.94331	0.15994	1.7374	0.11264	0.63729	-5.0182	PGLYRP5	peptidoglycan-recognition protein sc2-like
s2f_0006694001	0.94242	0.5416	3.5358	0.0053084	0.1744	-2.1295	NPPB	brain natriuretic peptide-like
s2f_0006424004	0.94213	3.4072	2.898	0.015724	0.29033	-3.1852	MIA	melanoma-derived growth regulatory protein
s2f_0000343009	-0.94157	-2.76	-1.1071	0.29391	0.77013	-5.8087	TAAR15	trace amine-associated receptor 13c-like
s2f_0002535004	0.9412	2.273	1.9106	0.084818	0.57637	-4.7659	EGLN2	egl nine homolog 2
s2f_0000076042	-0.93999	1.8765	-2.4265	0.035428	0.424	-3.9602	CUZD1	cub and zona pellucida-like domain-containing protein 1
s2f_0000418003	-0.93928	2.7803	-3.4883	0.0057484	0.18205	-2.2073	OPN4XA	melanopsin-b-like
s2f_0000092007	0.93813	7.3304	4.1872	0.0018241	0.101	-1.082	SULT6B1	sulfotransferase 6b1-like
s2f_0029216001	-0.9379	-3.1045	-1.1283	0.28525	0.76794	-5.7861	SI:CH211-119O8.4	somatostatin receptor type 3-like
s2f_0009196001	-0.9379	-3.1106	-1.0909	0.30065	0.77104	-5.8257	s2f_0009196001	natterin-3-like
s2f_0000934003	0.93758	-1.559	2.0399	0.068363	0.53446	-4.5705	TSHR	thyrotropin receptor-like
s2f_0013734001	0.93758	-2.572	1.0909	0.30066	0.77104	-5.8257	PTCRA	pre t-cell antigen receptor alpha
s2f_0001928005	0.93758	-2.5804	1.0609	0.31344	0.77336	-5.8566	NEURL3	e3 ubiquitin-protein ligase neurl3
s2f_0035926001	0.93758	-2.4153	0.88897	0.39469	0.8005	-6.0202	s2f_0035926001	hypothetical protein
s2f_0010933001	-0.93753	4.0773	-1.4209	0.18547	0.72202	-5.4441	ZBTB4	zinc finger and btb domain-containing protein 4
s2f_0007872001	0.93624	0.9048	2.1335	0.058393	0.5082	-4.426	NAT6	n-alpha-acetyltransferase 80
s2f_0000424022	-0.934	-0.30113	-1.4059	0.18975	0.72581	-5.463	ZGC:153846	gamma-crystallin m3-like
s2f_0010615001	0.93387	3.2039	6.5376	6.2617e-05	0.015948	2.1873	ZACN	zinc-activated ligand-gated ion channel
s2f_0000015044	0.93383	6.2803	5.9894	0.00012836	0.023592	1.5024	KEAP1	kelch-like ech-associated protein 1
s2f_0000229013	0.93307	-1.88	1.2951	0.22409	0.74293	-5.598	CABZ01093075.1	c-c chemokine receptor type 5-like
s2f_0004266003	0.93307	-1.8331	1.0754	0.3072	0.77284	-5.8418	HAS1	hyaluronan synthase 1
s2f_0001961002	0.93246	-1.3128	2.8239	0.017866	0.30634	-3.3081	LMLN2	leishmanolysin-like peptidase 2
s2f_0000588021	-0.93242	0.01043	-1.7342	0.11322	0.63796	-5.0227	CLM1	polymeric immunoglobulin receptor-like
s2f_0000687007	-0.93137	0.077695	-2.5179	0.030276	0.39524	-3.8118	RAB4B	ras-related protein rab-4b
s2f_0000256013	-0.93131	-0.53589	-2.2842	0.045202	0.46326	-4.1886	LRP13	low-density lipoprotein receptor-related protein 2-like
s2f_0004806001	0.93046	0.12101	2.5853	0.026958	0.37991	-3.7016	RNF222	ring finger protein 222
s2f_0003313005	0.92929	-2.63	0.97025	0.35457	0.7852	-5.9458	ZNF281	zinc finger protein 281
s2f_0001075005	-0.92915	0.97955	-1.2216	0.24961	0.75392	-5.6834	DUSP3	dual specificity protein phosphatase 3
s2f_0000050028	0.92868	0.8482	2.8786	0.016259	0.2924	-3.2174	GPRC6A	g-protein coupled receptor family c group 6 member a
s2f_0003047009	-0.9283	-1.6544	-2.0499	0.067227	0.53052	-4.5552	s2f_0003047009	cd48 antigen-like
s2f_0000216024	0.92776	-0.16049	2.0301	0.069499	0.53471	-4.5856	TLR3	toll-like receptor 3
s2f_0000426022	-0.92767	-0.7357	-1.4446	0.17886	0.71428	-5.4141	PARP142.2	poly [adp-ribose] polymerase 14-like
s2f_0000022022	-0.92728	4.3759	-3.7528	0.0036979	0.14896	-1.7754	CYP4V2	cytochrome p450 4v2
s2f_0005101002	-0.92466	0.44939	-0.77592	0.45557	0.82489	-6.1143	TMEM86A	lysoplasmalogenase-like protein tmem86a
s2f_0002805004	-0.92448	2.4319	-1.2145	0.25217	0.75444	-5.6913	ELL3	rna polymerase ii elongation factor ell2-like
s2f_0030806001	-0.92439	-1.9344	-0.92076	0.37863	0.79504	-5.9917	s2f_0030806001	t cell receptor delta constant isoform x1
s2f_0001251008	-0.92258	5.8426	-5.4881	0.00025646	0.034229	0.83471	C3B.1	complement c3-like
s2f_0006242002	-0.92104	-0.7065	-0.92092	0.37855	0.79504	-5.9916	CMTM8	cklf-like marvel transmembrane domain-containing protein 8
s2f_0009198002	-0.91928	-1.5383	-1.408	0.18914	0.72474	-5.4603	MEI1	meiosis inhibitor protein 1-like
s2f_0000039031	-0.91916	1.6874	-1.532	0.15621	0.69115	-5.3005	RAB30	ras-related protein rab-30
s2f_0011121001	-0.91898	-0.15918	-1.5356	0.15533	0.69	-5.2957	s2f_0011121001	sialoadhesin-like
s2f_0000562004	-0.91841	1.3423	-4.8007	0.00070175	0.060634	-0.14565	ATP7B	copper-transporting atpase 2 isoform x1
s2f_0001031006	-0.91821	3.2567	-3.4459	0.006174	0.1872	-2.2771	LRP-1	l-rhamnose-binding lectin csl3-like
s2f_0000021038	0.91795	2.8381	5.2911	0.00033987	0.040105	0.56142	PTPN22	tyrosine-protein phosphatase non-receptor type 22 isoform x1
s2f_0002977004	0.91688	0.40753	2.6139	0.025662	0.3717	-3.6547	RNF213B	e3 ubiquitin-protein ligase rnf213-beta-like
s2f_0001257002	-0.91678	-2.5298	-0.91866	0.37968	0.79539	-5.9936	CD22	sialoadhesin-like
s2f_0003144004	0.91596	-0.83567	1.3406	0.2094	0.73529	-5.5435	HORMAD2	horma domain-containing protein 2
s2f_0001701002	-0.91574	0.67147	-3.6774	0.0041903	0.15769	-1.8979	PLCXD2	pi-plc x domain-containing protein 2
s2f_0001251009	-0.9144	3.9601	-4.9368	0.00057188	0.054104	0.054352	C5	complement c5
s2f_0013490001	0.91426	-1.4677	0.90364	0.38722	0.7986	-6.0071	WDR38	wd repeat-containing protein 38
s2f_0001176005	0.91339	2.0857	2.6824	0.022803	0.35141	-3.542	NIT1	deaminated glutathione amidase isoform x1
s2f_0002500002	-0.91271	4.0774	-1.5868	0.14332	0.67413	-5.2271	PPP1R14C	protein phosphatase 1 regulatory subunit 14c
s2f_0000221015	-0.91235	3.7281	-1.8317	0.096599	0.60518	-4.8823	SEPT5B	septin-5-like
s2f_0003267002	-0.91223	0.6905	-2.7991	0.018647	0.31296	-3.3492	KCNT2	potassium channel subfamily t member 2 isoform x1
s2f_0000193003	-0.91149	1.0921	-3.9056	0.0028762	0.13062	-1.529	SLC25A27	mitochondrial uncoupling protein 4
s2f_0000016037	0.91125	0.47411	3.3475	0.0072918	0.20152	-2.4396	s2f_0000016037	hypothetical protein
s2f_0001189009	0.91022	0.21077	2.389	0.03778	0.43404	-4.0207	GRB14	growth factor receptor-bound protein 14 isoform x1
s2f_0003555004	-0.9099	3.0244	-3.9056	0.0028761	0.13062	-1.5289	EBP	3-beta-hydroxysteroid-delta(8), delta(7)-isomerase
s2f_0001362003	0.90939	6.4562	4.1284	0.0020042	0.1054	-1.1745	PONZR2	cornifelin homolog b-like
s2f_0528172001	0.90928	-1.8647	1.7159	0.11662	0.64331	-5.0486	s2f_0528172001	cell surface glycoprotein 1-like
s2f_0007271002	0.90883	0.63742	3.3752	0.0069577	0.1974	-2.3938	DNAAF4	dynein assembly factor 4, axonemal isoform x1
s2f_0006934002	-0.90744	-0.80627	-1.0214	0.33089	0.77568	-5.8962	GPRIN1	g protein-regulated inducer of neurite outgrowth 1
s2f_0003124006	-0.90726	1.7633	-1.4458	0.17852	0.71413	-5.4125	GPR185B	g-protein coupled receptor 12-like
s2f_0005689001	-0.9065	-0.68875	-1.6547	0.12867	0.65514	-5.1342	XRCC2	dna repair protein xrcc2
s2f_0000243009	-0.90546	2.2025	-3.3851	0.0068413	0.19704	-2.3773	SLC38A8	putative sodium-coupled neutral amino acid transporter 8
s2f_0008122002	-0.90491	2.2979	-1.5569	0.15024	0.68286	-5.2674	DNAJC27	dnaj homolog subfamily c member 27
s2f_0017396001	-0.90474	-0.87411	-1.5486	0.15221	0.68453	-5.2784	SI:DKEY-15J16.3	polymeric immunoglobulin receptor-like
s2f_0002519004	-0.90471	1.8912	-1.5103	0.16157	0.69627	-5.329	RASGRP3	ras guanyl-releasing protein 3 isoform x1
s2f_0000359007	-0.90439	8.433	-3.6355	0.0044934	0.16429	-1.9663	FABP2	fatty acid-binding protein, intestinal-like
s2f_0002199004	-0.9038	2.6085	-2.1142	0.060334	0.51623	-4.4561	PEX5L	pex5-related protein isoform x1
s2f_0010123001	0.90295	-0.49338	1.4448	0.1788	0.71428	-5.4138	CUNH1ORF158	uncharacterized protein c1orf158 homolog
s2f_0000105026	0.90225	5.8453	3.6236	0.0045831	0.16429	-1.9857	MMP9	matrix metalloproteinase-9
s2f_0005589001	-0.90218	-2.8609	-0.77133	0.45817	0.82542	-6.1179	NEUTE1DRAFT_68063	hypothetical protein
s2f_0008767002	-0.90198	4.2238	-3.1426	0.010334	0.23752	-2.779	CUNH6ORF58	protein leg1 homolog
s2f_0031080001	0.90127	-0.77526	1.8998	0.086345	0.57773	-4.782	s2f_0031080001	type-1a angiotensin ii receptor-like
s2f_0000336011	-0.90077	-0.97592	-1.0566	0.31529	0.77365	-5.861	SI:DKEY-78K11.9	p2y purinoceptor 1-like
s2f_0335900001	0.90057	-1.8337	1.1042	0.2951	0.77013	-5.8118	s2f_0335900001	nacht, lrr and pyd domains-containing protein 12-like
s2f_0012192001	0.90057	-1.7887	0.99914	0.34105	0.78021	-5.9181	CUNH3ORF80	uncharacterized membrane protein c3orf80 homolog
s2f_0000180015	-0.8998	8.8603	-3.2666	0.0083653	0.21587	-2.5734	CHIT1	acidic mammalian chitinase-like
s2f_0000595005	-0.8978	-0.9322	-0.91091	0.38356	0.79705	-6.0006	HS3ST6	heparan sulfate glucosamine 3-o-sulfotransferase 6-like
s2f_0016100001	-0.89754	-2.3525	-1.0087	0.33666	0.77758	-5.9088	s2f_0016100001	hypothetical protein
s2f_0044459001	0.89706	-1.7228	1.7389	0.11237	0.63729	-5.016	HER11	transcription factor hes-7-like
s2f_0002998011	-0.89635	-0.59329	-1.8386	0.095506	0.6031	-4.8722	s2f_0002998011	uncharacterized protein loc106096882
s2f_0005200001	0.89599	0.10059	2.0916	0.062668	0.52256	-4.491	CENPV	centromere protein v
s2f_0000760002	-0.89559	2.2917	-1.0051	0.33829	0.779	-5.9122	ADARB2	double-stranded rna-specific editase b2
s2f_0000046011	-0.89451	0.88418	-1.7377	0.11258	0.63729	-5.0177	DRD4	d(4) dopamine receptor
s2f_0002818005	0.89438	0.96847	4.5054	0.0011042	0.075026	-0.58957	CARD9	caspase recruitment domain-containing protein 9 isoform x1
s2f_0010335001	0.89437	0.87282	1.4145	0.18728	0.72414	-5.4522	KCNE4	potassium voltage-gated channel subfamily e member 4
s2f_0000545010	0.89382	6.9331	3.8698	0.0030499	0.1342	-1.5865	CBR1	carbonyl reductase [nadph] 1-like
s2f_0007799004	0.89355	-1.5205	1.3596	0.20351	0.73166	-5.5203	FAM47E	protein fam47e-like
s2f_0001844006	-0.89224	2.7878	-2.0454	0.067743	0.53238	-4.5622	FOSB	protein fosb isoform x1
s2f_0012773001	0.88945	-2.0116	1.004	0.33879	0.77906	-5.9133	s2f_0012773001	receptor-type tyrosine-protein phosphatase eta-like
s2f_0015016001	-0.88796	-1.0609	-1.7804	0.10504	0.62417	-4.9566	ANGPTL8	angiopoietin-like protein 8
s2f_0000768006	-0.88795	1.9663	-3.4003	0.0066681	0.19417	-2.3523	SRR	hypothetical protein
s2f_0002495001	-0.88705	4.3486	-1.5419	0.15382	0.6876	-5.2873	MAP1B	microtubule-associated protein 1b
s2f_0035053001	0.88695	-0.13516	2.2342	0.049224	0.47205	-4.268	SI:CH1073-340I21.1	putative uncharacterized protein ddb_g0292636
s2f_0019833001	0.88554	-3.8143	1.632	0.13342	0.66068	-5.1656	SI:DKEY-9I23.8	parapinopsin-like
s2f_0000149046	0.88554	-3.6116	1.3735	0.1993	0.72944	-5.5032	C1QTNF7	complement c1q tumor necrosis factor-related protein 7
s2f_0000492010	0.88554	-4.272	1.3087	0.21962	0.74045	-5.5819	HBA	hemoglobin subunit alpha-like
s2f_0105662001	0.88554	-4.1399	1.2653	0.23416	0.75066	-5.633	s2f_0105662001	gastrula zinc finger protein xlcgf49.1-like
s2f_0009160008	0.88554	-4.2106	1.2326	0.24563	0.75238	-5.6708	s2f_0009160008	proline-rich extensin-like protein epr1
s2f_0057079001	0.88554	-2.6997	1.2302	0.24647	0.75238	-5.6735	s2f_0057079001	transcription factor spn1-like
s2f_0000555003	0.88554	-4.1399	1.2056	0.25543	0.75544	-5.7013	TULP1	tubby-related protein 1
s2f_0574588001	0.88554	-4.1399	1.201	0.25714	0.75766	-5.7065	s2f_0574588001	(genbank) unnamed protein product
s2f_0000256011	0.88554	-3.3014	1.177	0.26617	0.76113	-5.7333	LRP2	low-density lipoprotein receptor-related protein 2
s2f_0000050023	0.88554	-2.9697	1.175	0.26693	0.76113	-5.7354	CASR	extracellular calcium-sensing receptor
s2f_0001808002	0.88554	-4.1399	1.1577	0.2736	0.76139	-5.7544	RPS24	40s ribosomal protein s24
s2f_0000105006	0.88554	-4.2106	1.1372	0.28171	0.76626	-5.7767	MMP19	matrix metalloproteinase-19
s2f_0048000001	0.88554	-3.2548	1.1307	0.2843	0.76794	-5.7836	FGD1	fyve, rhogef and ph domain-containing protein 1-like
s2f_0000103006	0.88554	-3.5804	1.064	0.31208	0.77325	-5.8534	MSI2	ubp1-associated protein 2c-like
s2f_0000099002	0.88554	-4.272	1.0542	0.31636	0.77385	-5.8635	s2f_0000099002	histone h2b, gonadal-like
s2f_0000535007	0.88554	-2.9292	1.0507	0.31787	0.77385	-5.8669	s2f_0000535007	(genbank) conserved hypothetical protein
s2f_0522548001	0.88554	-4.1701	1.036	0.32434	0.77568	-5.8817	s2f_0522548001	uncharacterized protein loc107564694
s2f_0003345001	0.88554	-1.9564	1.0231	0.33015	0.77568	-5.8946	s2f_0003345001	c2 calcium-dependent domain-containing protein 4c-like
s2f_0000119049	0.88554	-3.6915	1.0217	0.33078	0.77568	-5.896	GFAP	glial fibrillary acidic protein-like
s2f_0009305003	0.88554	-3.4554	1.0126	0.3349	0.77671	-5.905	s2f_0009305003	immunoglobulin alpha-2 heavy chain-like
s2f_0057062001	0.88554	-4.0078	1.0115	0.3354	0.77671	-5.906	s2f_0057062001	uncharacterized protein loc112151342 isoform x2
s2f_0016112001	0.88554	-4.1701	0.99264	0.34406	0.78021	-5.9244	s2f_0016112001	(genbank) unnamed protein product
s2f_0176631001	0.88554	-4.0078	0.99085	0.34489	0.78021	-5.9261	s2f_0176631001	histone h2b-like
s2f_0037799001	0.88554	-4.0785	0.97708	0.35134	0.78328	-5.9393	s2f_0037799001	interaptin-like
s2f_0000355003	0.88554	-3.0776	0.93578	0.37121	0.79348	-5.978	USP31	ubiquitin carboxyl-terminal hydrolase 31
s2f_0012231001	0.88554	-3.1399	0.91757	0.38022	0.7959	-5.9946	CUNH2ORF73	uncharacterized protein c2orf73 homolog
s2f_0017596001	0.88554	-3.6915	0.90643	0.38581	0.79822	-6.0046	ORA5	rhodopsin-like
s2f_0335916001	0.88554	-3.526	0.88686	0.39577	0.80057	-6.022	s2f_0335916001	uncharacterized protein loc100002472
s2f_0076748001	0.88554	-3.6511	0.87476	0.40202	0.80256	-6.0326	s2f_0076748001	uncharacterized protein loc103909845
s2f_0006695003	0.88554	-3.271	0.68849	0.50664	0.8411	-6.1793	s2f_0006695003	5-hydroxytryptamine receptor 3a-like
s2f_0000651006	-0.88506	5.479	-2.7561	0.02008	0.32651	-3.4203	SLC24A2	sodium/potassium/calcium exchanger 2 isoform x1
s2f_0000830001	0.88478	0.16521	2.5352	0.029385	0.39114	-3.7835	ITIH5	inter-alpha-trypsin inhibitor heavy chain h5
s2f_0009484001	-0.88442	2.5034	-3.2639	0.0084033	0.21587	-2.5779	TYMP	thymidine phosphorylase-like
s2f_0000229007	-0.88441	-3.5756	-1.1103	0.29258	0.77013	-5.8053	CXCR2	c-x-c chemokine receptor type 1-like
s2f_0007190012	-0.88441	-3.5049	-0.71986	0.48793	0.83546	-6.1568	s2f_0007190012	--
s2f_0000854008	-0.8844	3.9239	-1.1079	0.29357	0.77013	-5.8078	DOCK3	dedicator of cytokinesis protein 3-like
s2f_0006323004	-0.88351	1.5393	-2.9759	0.013753	0.27229	-3.0559	RFPL4B	zinc finger protein rfp-like
s2f_0000657002	-0.88338	1.4822	-3.0694	0.011714	0.25458	-2.9006	E2F1	transcription factor e2f1
s2f_0007416002	0.88175	4.4233	2.6474	0.024223	0.35926	-3.5997	SI:CH211-220M17.5	guanylin-like
s2f_0006536002	0.88103	-0.75214	2.8354	0.017515	0.30291	-3.2891	SAA	serum amyloid a-5 protein-like
s2f_0011799001	0.88079	0.12533	1.9439	0.080261	0.56665	-4.7162	MUC1	mucin-1
s2f_0001640006	-0.87996	6.1126	-4.2387	0.00168	0.095851	-1.0013	PDZK1	na(+)/h(+) exchange regulatory cofactor nhe-rf3
s2f_0019319001	0.87891	3.2034	5.4275	0.00027949	0.035708	0.75135	SI:CH211-136M16.8	uncharacterized protein si:ch211-136m16.8
s2f_0002314001	0.87825	2.3884	3.6035	0.0047393	0.1663	-2.0185	ERO1A	ero1-like protein alpha
s2f_0004340001	0.87776	5.532	5.9769	0.00013054	0.023592	1.4862	FAH	fumarylacetoacetase
s2f_0000050040	-0.87771	-2.3971	-0.69919	0.50021	0.83834	-6.1717	OLFCH1	extracellular calcium-sensing receptor-like
s2f_0006973002	0.87752	3.1778	3.3627	0.0071063	0.19967	-2.4144	VHL	von hippel-lindau disease tumor suppressor
s2f_0007529001	0.87752	-1.5647	1.1261	0.28617	0.76794	-5.7886	MEIOB	meiosis-specific with ob domain-containing protein
s2f_0001696001	-0.87745	1.2044	-2.1237	0.059373	0.51203	-4.4413	SOWAHA	ankyrin repeat domain-containing protein sowaha
s2f_0009452002	0.8772	4.6971	5.4535	0.00026934	0.035494	0.78724	ADM	adm-like
s2f_0011867001	-0.87626	-1.9193	-1.2748	0.23093	0.74863	-5.622	TMEM232	transmembrane protein 232
s2f_0000063044	-0.87622	4.0301	-3.3123	0.0077401	0.20697	-2.4978	KCNB2	potassium voltage-gated channel subfamily b member 2
s2f_0001511002	-0.87523	2.2028	-3.8691	0.0030534	0.1342	-1.5876	TMC4	transmembrane channel-like protein 7
s2f_0000213005	0.87489	1.186	2.053	0.066882	0.53037	-4.5505	C09F5.3	hypothetical protein
s2f_0000347020	0.87442	-1.3865	0.81874	0.43182	0.81614	-6.0799	MFRP	membrane frizzled-related protein
s2f_0002333004	0.87277	1.6992	3.6732	0.0042196	0.15769	-1.9047	MYMK	protein myomaker
s2f_0003697004	-0.87259	-1.7949	-1.3535	0.2054	0.73253	-5.5278	DNASE2B	deoxyribonuclease-2-beta
s2f_0000124001	0.87236	3.0386	3.4551	0.0060793	0.18632	-2.262	ATP10A	probable phospholipid-transporting atpase va
s2f_0009753002	-0.87235	-2.0421	-0.93032	0.3739	0.79487	-5.983	IL12A	interleukin-12 subunit alpha-like
s2f_0019078001	-0.87235	-1.5836	-0.85158	0.41417	0.80873	-6.0525	s2f_0019078001	interleukin-6 receptor subunit beta-like
s2f_0003124007	-0.8722	0.83106	-1.1062	0.29427	0.77013	-5.8096	GPR12	g-protein coupled receptor 12
s2f_0005770001	-0.87204	1.7638	-1.5819	0.14445	0.6756	-5.2338	SNPHB	syntaphilin-like isoform x1
s2f_0000028041	0.87187	0.84066	3.0062	0.013056	0.26589	-3.0056	SI:DKEY-43P13.5	homeobox protein unc-4
s2f_0076740001	0.87164	0.68023	2.6678	0.023385	0.35599	-3.5661	SI:CH211-139N6.3	gtpase imap family member 8-like
s2f_0000002091	0.87152	1.3525	2.6641	0.023532	0.35605	-3.5721	BARX2	homeobox protein barh-like 2
s2f_0010389001	0.87019	-1.0978	1.136	0.28219	0.76651	-5.778	CD180	cd180 antigen
s2f_0003213004	-0.86969	-0.12119	-0.77074	0.4585	0.82542	-6.1183	PHF1	phd finger protein 1 isoform x1
s2f_0001818003	-0.86822	3.1175	-2.5181	0.030265	0.39524	-3.8114	FAM46A	terminal nucleotidyltransferase 5a
s2f_0002480003	0.86739	3.772	3.1474	0.01025	0.23718	-2.7711	PHLDB3	pleckstrin homology-like domain family b member 3
s2f_0004375001	-0.8669	2.1942	-1.2317	0.24595	0.75238	-5.6718	FBXL20	f-box/lrr-repeat protein 20 isoform x1
s2f_0000662002	-0.86645	-0.47335	-2.3867	0.037929	0.43479	-4.0244	HSD17B3	testosterone 17-beta-dehydrogenase 3
s2f_0001121002	-0.86624	4.9842	-4.0355	0.0023283	0.11337	-1.3216	SPTBN5	spectrin beta chain, non-erythrocytic 5
s2f_0004094002	-0.8662	0.32124	-1.8328	0.096423	0.60487	-4.8807	RXFP3.2A	relaxin-3 receptor 1-like
s2f_0005105003	0.86613	-2.4494	0.86576	0.4067	0.80416	-6.0404	CCNJ	cyclin-j isoform x1
s2f_0002142001	-0.86576	-1.4923	-1.0894	0.30126	0.77104	-5.8272	GPR171	p2y purinoceptor 14-like
s2f_0002267014	-0.86545	-0.035401	-2.1874	0.053294	0.48779	-4.3417	MOR119-1	olfactory receptor 52b2-like
s2f_0004946004	-0.86517	-2.9502	-1.2421	0.24226	0.75123	-5.6599	PTPN18	hypothetical protein
s2f_0056128001	-0.86517	-3.7739	-1.1941	0.25973	0.75919	-5.7143	s2f_0056128001	uncharacterized loc108265832
s2f_0068620001	-0.86517	-3.3464	-1.0921	0.30013	0.77104	-5.8244	s2f_0068620001	uncharacterized protein loc101886660
s2f_0006005044	-0.86517	-3.2758	-0.79066	0.4473	0.82252	-6.1026	s2f_0006005044	gastrula zinc finger protein xlcgf57.1-like
s2f_0000119046	0.86475	6.8816	3.9396	0.0027211	0.12671	-1.4746	SI:DKEY-222F2.1	keratin, type ii cytoskeletal 8-like
s2f_0000188002	-0.86446	-1.4695	-1.5846	0.14381	0.67413	-5.2301	TUA1	alpha tubulin
s2f_0000539014	-0.86435	2.3599	-1.1493	0.2769	0.76349	-5.7636	MID1	e3 ubiquitin-protein ligase midline-1-like
s2f_0003167001	0.86357	1.8551	4.775	0.00072971	0.061672	-0.18388	BMA-CPS-6	endonuclease g, mitochondrial
s2f_0045859001	-0.86353	-0.038214	-1.2113	0.25333	0.75444	-5.6949	s2f_0045859001	e3 ubiquitin-protein ligase trim39-like
s2f_0000287020	-0.8632	1.24	-2.8969	0.015757	0.29042	-3.1872	TBX4	t-box transcription factor tbx4
s2f_0004191002	-0.86206	3.6221	-1.9459	0.079985	0.56557	-4.7131	RHOBTB2	rho-related btb domain-containing protein 2
s2f_0003713004	0.86177	-0.86718	1.5341	0.15569	0.69057	-5.2976	DCST2	dc-stamp domain-containing protein 2
s2f_0003084006	0.86154	-0.61316	1.7687	0.10707	0.62737	-4.9735	CALHM6	calcium homeostasis modulator protein 6
s2f_0000885010	-0.8614	-0.50913	-0.92874	0.37467	0.79504	-5.9845	NMUR1	neuromedin-u receptor 1-like
s2f_0001058003	0.86129	-1.1239	1.6788	0.12379	0.64967	-5.1007	CRYBB3	beta-crystallin b3-like
s2f_0047997001	-0.86123	-1.7043	-1.6161	0.13682	0.66525	-5.1873	MAP4	microtubule associated protein 4
s2f_0003037005	-0.86123	-2.8586	-1.4623	0.17405	0.70891	-5.3914	SI:DKEY-220O5.5	actin filament-associated protein 1-like 2
s2f_0000534002	-0.86123	-2.9153	-1.2774	0.23002	0.74778	-5.6189	BMA-DPFF-1	zinc finger protein dpf3-like
s2f_0006157003	-0.86123	-2.5898	-1.2548	0.2378	0.7511	-5.6452	EDA2R	tumor necrosis factor receptor superfamily member 27
s2f_0000055002	-0.86123	-3.8548	-1.1128	0.29158	0.77013	-5.8027	H2A-L2	histone h2a
s2f_0000580001	-0.86123	-2.2386	-0.92683	0.37562	0.79504	-5.9862	ZGC:112408	band 7 protein agap004871-like
s2f_0176661001	-0.86123	-3.652	-0.86486	0.40718	0.80456	-6.0412	s2f_0176661001	(genbank) hypothetical protein
s2f_0037348001	-0.86123	-1.8058	-0.82518	0.42832	0.81416	-6.0746	s2f_0037348001	e3 ubiquitin-protein ligase herc2-like
s2f_0002208002	-0.86123	-3.265	-0.78631	0.44973	0.82319	-6.1061	MC2R	adrenocorticotropic hormone receptor
s2f_0000002025	0.86023	2.0129	3.9823	0.0025381	0.12134	-1.4062	EMX3	homeobox protein emx1-like
s2f_0007598004	-0.85962	-0.63656	-2.4562	0.033667	0.41491	-3.9121	TDGF1	cryptic protein-like
s2f_0005556004	-0.85957	2.2006	-4.1028	0.0020886	0.10681	-1.2149	ESR2A	estrogen receptor beta-like
s2f_0028181001	-0.85878	3.035	-3.0303	0.012527	0.25986	-2.9656	SI:CH211-288G17.4	uncharacterized protein loc107589401
s2f_0005661004	-0.85876	-0.81778	-2.5155	0.030399	0.39546	-3.8156	SHISA2A	protein shisa-1-like
s2f_0000118027	-0.85814	0.30952	-2.0767	0.064261	0.52354	-4.514	QRFPR	pyroglutamylated rfamide peptide receptor-like
s2f_0008805029	-0.85793	0.28074	-1.2403	0.2429	0.75133	-5.662	s2f_0008805029	carcinoembryonic antigen-related cell adhesion molecule 1-like
s2f_0001142003	0.85782	6.9026	3.1154	0.010827	0.24374	-2.8242	DHRS11	dehydrogenase/reductase sdr family member 11
s2f_0006581001	0.85778	2.2355	4.7296	0.00078183	0.062832	-0.25138	RFLNB	refilin-b
s2f_0010578001	-0.85774	2.2077	-1.1446	0.27875	0.76501	-5.7686	SUSD5	sushi domain-containing protein 5
s2f_0000104002	-0.8573	5.7363	-4.932	0.00057597	0.054149	0.047383	SLC15A2	solute carrier family 15 member 1
s2f_0000708001	0.85724	-2.773	1.3201	0.21592	0.73924	-5.5682	23.M06190	hypothetical protein
s2f_0006491002	0.85724	-3.3396	1.0711	0.30902	0.77284	-5.8461	APNL	delta-sagatoxin-srs1a-like
s2f_0005157003	0.85674	-0.40877	3.0648	0.011806	0.25506	-2.9082	CYTIP	cytohesin-interacting protein
s2f_0000060025	-0.85673	-1.4022	-1.3003	0.22236	0.74228	-5.5918	RAC1A	hypothetical protein
s2f_0008805001	-0.85612	-1.1937	-2.0787	0.06405	0.52354	-4.5109	s2f_0008805001	uncharacterized protein loc107575724
s2f_0000147015	0.85521	0.10664	1.6504	0.12955	0.65619	-5.1402	WNT5A	protein wnt-5a
s2f_0005583003	-0.85505	2.9806	-1.3355	0.21103	0.73616	-5.5497	FBXO41	f-box only protein 41-like
s2f_0042004001	0.85381	3.0129	4.0488	0.0022789	0.11242	-1.3005	SI:CH211-193K19.2	uncharacterized protein loc100034574
s2f_0000113006	0.8537	0.14921	3.1999	0.0093716	0.22815	-2.684	KATNAL2	katanin p60 atpase-containing subunit a-like 2 isoform x1
s2f_0005442003	0.8535	1.1645	2.7436	0.020517	0.33038	-3.4409	ZPLD1	zona pellucida-like domain-containing protein 1
s2f_0335913001	0.8522	-1.914	0.87276	0.40305	0.80299	-6.0343	s2f_0335913001	protein rna-directed dna methylation 3-like
s2f_0002874002	-0.85218	5.5247	-1.21	0.25382	0.75497	-5.6964	IGF2BP1	insulin-like growth factor 2 mrna-binding protein 1
s2f_0001578002	-0.852	2.2518	-2.5079	0.0308	0.39792	-3.828	RAPGEF3	rap guanine nucleotide exchange factor 3 isoform x1
s2f_0000047054	0.85193	0.28915	2.3262	0.042073	0.45218	-4.1216	NLRC5	protein nlrc5 isoform x1
s2f_0002277004	0.85173	2.2785	2.885	0.016081	0.2924	-3.2069	SFT2D2	vesicle transport protein sft2b
s2f_0015615001	0.85162	0.28971	2.0779	0.064137	0.52354	-4.5122	CSF3A	granulocyte colony-stimulating factor-like
s2f_0000171029	-0.85134	1.1974	-2.9046	0.015549	0.28987	-3.1744	GHRHRB	vasoactive intestinal polypeptide receptor 1-like
s2f_0000483015	0.85068	4.7965	6.5613	6.0758e-05	0.015948	2.2159	PTX3	pentraxin-related protein ptx3
s2f_0005044001	-0.85066	1.2507	-2.4207	0.035783	0.42594	-3.9696	VKORC1	vitamin k epoxide reductase complex subunit 1-like protein 1
s2f_0001359008	0.85041	6.8675	3.8787	0.0030058	0.13333	-1.5722	SI:DKEY-202L22.6	interferon-induced very large gtpase 1-like
s2f_0000515003	-0.84966	1.577	-2.9044	0.015554	0.28987	-3.1747	ZGC:110410	protein lifeguard 1-like
s2f_0007159002	0.84948	0.54956	1.709	0.11792	0.64433	-5.0583	PIH1D3	protein pih1d3
s2f_0000258004	0.84895	0.39927	2.3053	0.043598	0.45431	-4.1549	FGF7	fibroblast growth factor 7
s2f_0006820001	-0.84886	2.9469	-4.0786	0.0021717	0.1093	-1.2532	HSD17B7	3-keto-steroid reductase
s2f_0008118019	0.84853	-2.8678	0.8709	0.40402	0.80344	-6.0359	s2f_0008118019	zinc finger protein ozf-like
s2f_0001099004	-0.8481	-0.2481	-1.5114	0.16131	0.69618	-5.3276	UNC93A	protein unc-93 homolog a
s2f_0011408001	0.84799	0.11021	1.6803	0.12349	0.64967	-5.0986	CUNH11ORF1	upf0686 protein c11orf1 homolog
s2f_0104203001	-0.84788	-1.186	-1.2119	0.25311	0.75444	-5.6942	s2f_0104203001	uncharacterized protein loc109084618
s2f_0004635006	0.84702	7.5654	3.1421	0.010344	0.23752	-2.78	LGALS2A	beta-galactoside-binding lectin-like
s2f_0016259001	-0.84672	7.7338	-1.938	0.081044	0.56769	-4.7249	s2f_0016259001	low quality protein: uncharacterized protein loc111946339
s2f_0007386001	0.8467	2.45	3.7418	0.0037662	0.14896	-1.7933	HYLS1	hydrolethalus syndrome protein 1 homolog
s2f_0006662001	0.8466	6.3396	5.1994	0.00038819	0.043629	0.43213	OCLNA	occludin-like
s2f_0005545001	-0.84624	2.6642	-1.8162	0.099076	0.61122	-4.9048	UGCG	ceramide glucosyltransferase
s2f_0001207006	-0.84592	4.4741	-4.5653	0.0010061	0.071539	-0.49841	PM20D1	n-fatty-acyl-amino acid synthase/hydrolase pm20d1
s2f_0000949002	0.84591	6.9944	4.6267	0.00091528	0.068365	-0.40569	CTGF	connective tissue growth factor
s2f_0010255001	-0.8459	2.9501	-3.0968	0.011177	0.24787	-2.855	LRG1	leucine-rich alpha-2-glycoprotein
s2f_0010269001	-0.84567	0.80951	-1.3629	0.20252	0.73139	-5.5163	PAQR9	membrane progestin receptor epsilon
s2f_0001005001	-0.84564	1.9368	-2.8856	0.016066	0.2924	-3.2059	TMEM30C	cell cycle control protein 50c-like
s2f_0026442001	0.84459	-2.1018	1.0283	0.32779	0.77568	-5.8894	s2f_0026442001	cell wall integrity and stress response component 1
s2f_0000038013	0.84459	-3.2953	0.9609	0.35903	0.78761	-5.9546	BMA-GLR-1	glutamate receptor 1-like
s2f_0021711001	0.84459	-2.1428	0.85694	0.41134	0.80586	-6.0479	SI:DKEY-1H4.4	leucine-rich repeat protein shoc-2-like
s2f_0000042014	0.84459	-3.519	0.77844	0.45415	0.82456	-6.1123	LJ1G3V1380980.1	zinc finger mym-type protein 1-like
s2f_0009263002	-0.84457	2.371	-3.0926	0.011258	0.24895	-2.8621	TMEM82	transmembrane protein 82
s2f_0000258024	-0.84377	-0.20374	-2.9693	0.013911	0.27397	-3.067	FGF22	fibroblast growth factor 22
s2f_0001128007	-0.84357	0.81524	-2.2707	0.046251	0.46573	-4.21	VWA5B2	von willebrand factor a domain-containing protein 5b2
s2f_0002259002	-0.84346	-1.8072	-0.91859	0.37971	0.79539	-5.9937	RPL29	60s ribosomal protein l29
s2f_0000318005	-0.84294	4.1531	-4.0861	0.0021457	0.10846	-1.2414	CDHR2	protocadherin fat 4-like
s2f_0000289001	-0.8429	1.1079	-0.84903	0.41553	0.80896	-6.0547	CPNE7	copine-7
s2f_0000185018	-0.84181	0.60415	-1.3673	0.20117	0.73043	-5.5109	GALR2	galanin receptor type 2-like
s2f_0000953006	0.84172	5.8349	3.2181	0.0090847	0.22495	-2.6537	BTG1	protein btg1
s2f_0010926001	-0.8414	-1.1741	-2.3718	0.038912	0.43814	-4.0485	SERTM1	serine-rich and transmembrane domain-containing protein 1
s2f_0019216001	0.84028	0.45616	1.7273	0.11449	0.63876	-5.0325	s2f_0019216001	g-protein coupled receptor 4-like
s2f_0008729001	0.83843	-1.4944	1.3595	0.20356	0.73166	-5.5205	s2f_0008729001	leucine-rich repeat-containing protein 27-like
s2f_0005121003	-0.83812	0.35517	-2.3212	0.042432	0.45306	-4.1296	CGAS	cyclic gmp-amp synthase
s2f_0000145020	-0.83778	2.4917	-3.1889	0.0095484	0.22964	-2.7022	GUCA1G	guanylyl cyclase-activating protein 2-like
s2f_0115702001	0.83741	-1.3666	1.3622	0.20274	0.73166	-5.5172	s2f_0115702001	cytolytic toxin-beta-like
s2f_0007110003	0.83741	-1.2905	1.3054	0.22069	0.74061	-5.5858	ALKAL1	alk and ltk ligand 1
s2f_0000105030	0.83725	2.7846	4.8794	0.00062323	0.056649	-0.02965	MMP28	matrix metalloproteinase-28
s2f_0000318022	-0.83725	4.9152	-3.3361	0.007434	0.20246	-2.4584	CDHR2	cadherin-related family member 2
s2f_0012716001	-0.83688	-2.0978	-1.982	0.075316	0.55138	-4.6586	RNF135	e3 ubiquitin-protein ligase rnf135
s2f_0018756001	-0.83688	-2.7894	-0.90687	0.38559	0.79822	-6.0043	CD5	t-cell surface glycoprotein cd5-like
s2f_0000419009	-0.83601	8.0397	-5.7343	0.00018177	0.026902	1.1676	A2ML	alpha-2-macroglobulin-like
s2f_0001841002	-0.83585	2.0815	-1.3969	0.19237	0.72831	-5.4742	WSCD2	wsc domain-containing protein 2
s2f_0000868010	-0.83546	2.2483	-2.5238	0.029971	0.39524	-3.8022	PLA2G1B	phospholipase a2
s2f_0000377003	-0.83516	2.1289	-2.5422	0.029036	0.39066	-3.7721	SI:DKEY-10O6.2	upf0676 protein c1494.01-like
s2f_0000040039	-0.83476	1.8414	-2.1515	0.056644	0.50278	-4.398	ZGC:194887	fibrinogen-like protein 1-like protein
s2f_0000437013	-0.83475	3.5062	-1.5262	0.15762	0.69252	-5.3081	CACNA1E	voltage-dependent r-type calcium channel subunit alpha-1e isoform x1
s2f_0000149038	0.83474	2.4606	2.9018	0.015624	0.29012	-3.179	C1QTNF5	complement c1q tumor necrosis factor-related protein 5
s2f_0003980002	-0.83363	0.38632	-1.4224	0.18504	0.72202	-5.4422	DPH3	dph3 homolog
s2f_0000001039	-0.8331	0.85484	-2.4087	0.036523	0.42928	-3.9889	TMPRSS6	transmembrane protease serine 6
s2f_0007856003	-0.83294	-1.9021	-1.1016	0.29617	0.77013	-5.8145	CUNH21ORF58	uncharacterized protein c21orf58 homolog isoform x1
s2f_0006713001	-0.83255	1.6357	-1.2829	0.22816	0.74613	-5.6124	PRRG1	transmembrane gamma-carboxyglutamic acid protein 1-like
s2f_0000736007	0.83245	-0.08029	1.8365	0.09583	0.60365	-4.8752	TBXA2R	thromboxane a2 receptor
s2f_0001468005	-0.83239	3.1835	-1.8856	0.088387	0.58397	-4.803	THRB	thyroid hormone receptor beta isoform x1
s2f_0005940003	-0.83219	1.3169	-2.4867	0.031945	0.40605	-3.8625	FAM167A	protein fam167a
s2f_0001511008	-0.82879	-0.035447	-2.7065	0.021874	0.34454	-3.5022	TMC8	transmembrane channel-like protein 8 isoform x1
s2f_0001307009	-0.82811	2.9322	-3.7888	0.0034844	0.14549	-1.7171	MALRD1	mam and ldl-receptor class a domain-containing protein 1
s2f_0000717006	-0.82805	2.5278	-2.9346	0.014765	0.28395	-3.1245	ACSS2L	acetyl-coenzyme a synthetase
s2f_0000261009	-0.8274	0.76819	-1.8995	0.086392	0.57773	-4.7825	DSIM_GD13586	glucose transporter type 1 isoform x1
s2f_0335868001	-0.82709	1.206	-1.4583	0.17513	0.7104	-5.3965	s2f_0335868001	homer protein homolog 1-like
s2f_0000685008	-0.8265	2.5012	-3.9734	0.0025751	0.12181	-1.4204	SLC13A5	solute carrier family 13 member 5
s2f_0002040005	0.82601	6.5666	3.4634	0.0059944	0.18522	-2.2483	JUN	transcription factor ap-1
s2f_0001818006	-0.82532	3.1329	-2.3535	0.040152	0.44254	-4.0779	TENT5D	terminal nucleotidyltransferase 5d
s2f_0000949012	0.82506	5.5872	2.835	0.017529	0.30291	-3.2898	CYR61	protein cyr61
s2f_0004269001	0.82486	1.4886	2.8825	0.016151	0.2924	-3.211	EPM2A	laforin
s2f_0010575001	-0.82422	-2.5642	-1.6403	0.13165	0.65859	-5.1541	CD79B	b-cell antigen receptor complex-associated protein beta chain
s2f_0002673001	-0.82422	-3.0311	-1.6306	0.1337	0.66068	-5.1674	ABRACL	costars family protein
s2f_0008504002	-0.82422	-3.7841	-1.4487	0.17773	0.71332	-5.4088	GGR	geranylgeranyl diphosphate reductase, chloroplastic
s2f_0067030001	-0.82422	-4.1804	-1.4291	0.18314	0.71891	-5.4337	s2f_0067030001	uncharacterized loc108272850
s2f_0009010007	-0.82422	-4.0483	-1.422	0.18516	0.72202	-5.4428	WU:FC27B11	hypothetical protein
s2f_0000210036	-0.82422	-3.6511	-1.3882	0.1949	0.72845	-5.485	BTNL8	butyrophilin-like protein 2
s2f_0001249008	-0.82422	-4.1804	-1.3743	0.19906	0.72944	-5.5023	ATN1	atrophin-1 isoform x1
s2f_0077066001	-0.82422	-4.1804	-1.3383	0.21012	0.736	-5.5462	s2f_0077066001	protocadherin alpha-4-like
s2f_0067029001	-0.82422	-1.6816	-1.3001	0.22244	0.74228	-5.5921	SI:CH211-149B19.4	uncharacterized loc108275830
s2f_0000135040	-0.82422	-4.1189	-1.2933	0.2247	0.74318	-5.6002	s2f_0000135040	tripartite motif-containing protein 16-like
s2f_0000450016	-0.82422	-4.0483	-1.2788	0.22956	0.74709	-5.6173	ARRDC4	arrestin domain-containing protein 4
s2f_0005455002	-0.82422	-3.9869	-1.2547	0.23783	0.7511	-5.6453	PDE6H	retinal cone rhodopsin-sensitive cgmp 3',5'-cyclic phosphodiesterase subunit gamma
s2f_0000074018	-0.82422	-4.1896	-1.2522	0.23871	0.7511	-5.6482	ABCB2	hypothetical protein
s2f_0000693005	-0.82422	-0.8562	-1.2467	0.24063	0.7511	-5.6546	CLPC2	hypothetical protein
s2f_0002008001	-0.82422	-3.5292	-1.228	0.24729	0.75238	-5.6761	ATPC	atp synthase gamma chain, chloroplastic
s2f_0010223001	-0.82422	-1.4703	-1.2074	0.25479	0.75544	-5.6994	PLN	cardiac phospholamban
s2f_0001114005	-0.82422	-4.1189	-1.1866	0.26255	0.75963	-5.7227	s2f_0001114005	stonustoxin subunit alpha-like
s2f_0011004001	-0.82422	-2.9999	-1.1834	0.26374	0.75977	-5.7262	S100PBP	s100p-binding protein isoform x1
s2f_0020609001	-0.82422	-1.2503	-1.1794	0.26525	0.76092	-5.7306	s2f_0020609001	protein ifh1-like
s2f_0008027005	-0.82422	-4.0575	-1.1741	0.26728	0.76114	-5.7364	SI:CH211-198C19.1	uncharacterized protein si:ch211-198c19.1
s2f_0009760010	-0.82422	-2.2563	-1.17	0.26884	0.76137	-5.7409	s2f_0009760010	uncharacterized protein loc107552434 isoform x1
s2f_0099343001	-0.82422	-3.6208	-1.1574	0.27372	0.76139	-5.7547	s2f_0099343001	smoothelin-like
s2f_0115895001	-0.82422	-3.9254	-1.1226	0.28759	0.76815	-5.7923	s2f_0115895001	--
s2f_0004645003	-0.82422	-4.1189	-1.1089	0.29318	0.77013	-5.8068	TMEM178A	transmembrane protein 178a
s2f_0002070008	-0.82422	-4.1896	-1.0976	0.29783	0.77021	-5.8186	ASB5B	ankyrin repeat and socs box protein 5-like
s2f_0335869001	-0.82422	-3.9254	-1.0925	0.29997	0.77104	-5.824	s2f_0335869001	proline-rich extensin-like protein epr1
s2f_0032626001	-0.82422	-3.9254	-1.0889	0.30149	0.77104	-5.8278	CRLF2	cytokine receptor common subunit gamma-like
s2f_0000863026	-0.82422	-4.1804	-1.0728	0.30832	0.77284	-5.8444	SIRPB2	signal-regulatory protein beta-2-like
s2f_0020801001	-0.82422	-3.6208	-1.0644	0.31191	0.77325	-5.853	s2f_0020801001	adenosine receptor a3-like
s2f_0001130004	-0.82422	-3.8548	-1.0614	0.31322	0.77328	-5.8561	RPL7	60s ribosomal protein l7-1
s2f_0000233017	-0.82422	-4.0171	-1.0597	0.31394	0.77365	-5.8578	SYMBB.V1.2.014567.T1	hypothetical protein
s2f_0007098009	-0.82422	-3.2431	-1.036	0.32438	0.77568	-5.8818	s2f_0007098009	natural killer cell receptor 2b4-like
s2f_0000051025	-0.82422	-3.4678	-1.0214	0.33091	0.77568	-5.8963	s2f_0000051025	protocadherin gamma-a11-like
s2f_0010584001	-0.82422	-3.52	-1.0167	0.33303	0.77577	-5.9009	INHA	inhibin alpha chain
s2f_0000673027	-0.82422	-3.9464	-0.98024	0.34985	0.78273	-5.9363	s2f_0000673027	fc receptor-like protein 5
s2f_0129247001	-0.82422	-4.251	-0.97204	0.35372	0.7844	-5.9441	s2f_0129247001	tripartite motif-containing protein 16-like
s2f_0006639018	-0.82422	-4.251	-0.96644	0.35638	0.78665	-5.9494	s2f_0006639018	uncharacterized protein loc101469477 isoform x1
s2f_0000146004	-0.82422	-3.7841	-0.94309	0.36764	0.79196	-5.9713	LJ0G3V0135799.1	(genbank) hypothetical protein
s2f_0023249001	-0.82422	-3.4576	-0.91143	0.38329	0.797	-6.0002	OPN8C	opsin 8, group member c
s2f_0004400011	-0.82422	-3.7427	-0.87573	0.40151	0.80256	-6.0318	s2f_0004400011	leucine-rich repeat extensin-like protein 5
s2f_0076749001	-0.82422	-2.6977	-0.86423	0.4075	0.80463	-6.0417	s2f_0076749001	uncharacterized protein loc107694292
s2f_0573654001	-0.82422	-4.1087	-0.86243	0.40845	0.80484	-6.0432	s2f_0573654001	(genbank) unnamed protein product
s2f_0019610001	-0.82422	-3.3162	-0.86209	0.40863	0.80488	-6.0435	SI:DKEY-192K22.2	uncharacterized protein si:dkey-192k22.2 isoform x1
s2f_0010792001	-0.82422	-3.6511	-0.83719	0.42184	0.81124	-6.0646	TM4SF19	transmembrane 4 l6 family member 19
s2f_0001049009	-0.82422	-3.3464	-0.83583	0.42257	0.81126	-6.0658	s2f_0001049009	uncharacterized loc102808054
s2f_0001100022	-0.82422	-3.9427	-0.79228	0.4464	0.82157	-6.1013	s2f_0001100022	(genbank) hypothetical protein
s2f_0335918001	-0.82422	-2.0443	-0.76248	0.4632	0.82659	-6.1247	s2f_0335918001	putative leucine-rich repeat-containing protein ddb_g0290503
s2f_0000622004	0.82414	2.5869	2.6272	0.025078	0.36704	-3.6327	IRF1B	interferon regulatory factor 1-like
s2f_0060466001	0.82353	2.6793	4.8518	0.00064964	0.057705	-0.070218	s2f_0060466001	uncharacterized loc108263565
s2f_0002565004	0.8228	1.9791	2.039	0.068474	0.5347	-4.572	GTF2A1L	tfiia-alpha and beta-like factor
s2f_0000122012	-0.82266	1.0568	-2.1484	0.056943	0.50303	-4.4028	ADGRE10	adhesion g protein-coupled receptor e3-like
s2f_0000427002	-0.82181	4.3903	-1.1805	0.26484	0.76057	-5.7294	PLXNA2	plexin-a2
s2f_0006005059	0.82135	-0.70319	1.8281	0.097163	0.60679	-4.8875	s2f_0006005059	gastrula zinc finger protein xlcgf57.1-like
s2f_0000028009	-0.82125	-2.1856	-0.87491	0.40194	0.80256	-6.0325	HESX1	homeobox expressed in es cells 1
s2f_0007241001	-0.82113	-0.36716	-2.371	0.038962	0.43814	-4.0497	FGF19	fibroblast growth factor 19
s2f_0010612001	-0.82071	-1.0095	-2.061	0.065982	0.528	-4.5382	CD44	cd44 antigen isoform x1
s2f_0004958006	-0.82039	1.2449	-1.8843	0.088586	0.58437	-4.805	ST6GALNAC2	alpha-n-acetylgalactosaminide alpha-2,6-sialyltransferase 2
s2f_0088298001	0.82023	-2.2307	1.569	0.1474	0.68057	-5.2511	s2f_0088298001	uncharacterized protein loc100001846 isoform x1
s2f_0000175010	0.82023	-2.4336	1.0039	0.33885	0.77906	-5.9134	HISTONE_H4	histone h4
s2f_0020326001	0.82023	-2.8344	0.98483	0.3477	0.78141	-5.9319	SI:DKEY-182I3.11	insulin-like growth factor-binding protein complex acid labile subunit
s2f_0008805043	-0.8201	-0.95398	-1.1315	0.28396	0.76776	-5.7827	s2f_0008805043	uncharacterized protein loc107571335
s2f_0000171007	-0.81965	1.899	-2.051	0.067102	0.53052	-4.5535	CALCR	calcitonin receptor
s2f_0057070001	0.81952	-1.1418	1.5803	0.1448	0.67561	-5.2359	s2f_0057070001	uncharacterized protein loc103910731
s2f_0005752003	-0.81935	-0.90298	-1.4947	0.16554	0.70332	-5.3494	ZNF366	zinc finger protein 366
s2f_0002405010	-0.81923	-0.02627	-1.5779	0.14535	0.67601	-5.2392	ZP3A.1	zona pellucida sperm-binding protein 3-like
s2f_0000809001	0.81878	-1.3004	1.477	0.17015	0.70686	-5.3724	RPS27	40s ribosomal protein s27-like
s2f_0000072009	-0.81796	1.2527	-2.9878	0.013476	0.26966	-3.0362	ABCG8	atp-binding cassette sub-family g member 8
s2f_0013857001	-0.8179	1.2664	-1.1819	0.2643	0.76006	-5.7278	TRNP1	tmf-regulated nuclear protein 1
s2f_0018502001	0.81672	-2.8548	2.2616	0.046974	0.46749	-4.2245	TAS2R1	taste receptor type 2 member 136
s2f_0015422001	-0.81619	1.2638	-2.4323	0.035074	0.42281	-3.9508	CD80	cd276 antigen-like isoform x1
s2f_0000098022	-0.81544	1.8315	-1.5148	0.16046	0.69532	-5.3231	DOC2A	double c2-like domain-containing protein alpha
s2f_0001161006	-0.81542	0.611	-1.2666	0.23371	0.75066	-5.6315	GAL3ST3	galactose-3-o-sulfotransferase 3
s2f_0000231017	0.81514	4.989	3.9112	0.0028502	0.13029	-1.52	HER12	transcription factor hes-5-like
s2f_0000318011	-0.81486	4.5193	-1.2673	0.23348	0.75066	-5.6307	FAT3	protocadherin fat 3-like
s2f_0008860002	0.81434	-0.59872	1.5815	0.14452	0.6756	-5.2343	CCDC169	coiled-coil domain-containing protein 169-like
s2f_0004285003	0.814	5.1314	2.139	0.057851	0.5063	-4.4174	HMOX1A	heme oxygenase-like
s2f_0000025003	-0.81396	4.7285	-1.2872	0.22673	0.7444	-5.6074	CHD6	chromodomain-helicase-dna-binding protein 6 isoform x1
s2f_0008664002	-0.81378	0.53773	-2.5468	0.028804	0.38929	-3.7645	UMODL1	uromodulin-like 1
s2f_0005220004	-0.81348	2.8332	-1.3139	0.21794	0.73924	-5.5757	B4GALNT1	beta-1,4 n-acetylgalactosaminyltransferase 1-like
s2f_0009089002	0.81298	6.5065	3.7406	0.0037733	0.14896	-1.7952	TCAP	telethonin
s2f_0131735001	0.81298	3.8085	3.3316	0.0074909	0.20248	-2.4658	SI:CH73-347E22.8	structural maintenance of chromosomes protein 3-like
s2f_0002619001	-0.81213	1.3265	-1.2284	0.24713	0.75238	-5.6755	SSH3	protein phosphatase slingshot homolog 3 isoform x1
s2f_0008376001	0.81209	-0.48079	2.2736	0.046029	0.46564	-4.2056	UBXN11	ubx domain-containing protein 11
s2f_0013175001	-0.81157	-2.3024	-1.256	0.23739	0.7511	-5.6439	KNCN	kinocilin
s2f_0000093023	0.81109	4.0096	4.1579	0.0019116	0.10242	-1.128	B3GNT3	n-acetyllactosaminide beta-1,3-n-acetylglucosaminyltransferase 3-like
s2f_0000343012	-0.81097	0.21798	-2.0489	0.067344	0.53094	-4.5568	SI:CH211-139N6.11	trace amine-associated receptor 13c-like
s2f_0000041025	-0.8106	-0.3264	-1.6933	0.12095	0.64847	-5.0805	DNAJB13	dnaj homolog subfamily b member 13
s2f_0022499001	-0.80919	-0.7842	-0.97663	0.35155	0.78339	-5.9397	HCST	hematopoietic cell signal transducer
s2f_0051460001	-0.80919	-2.6501	-0.70841	0.49471	0.83727	-6.1651	s2f_0051460001	gtpase imap family member 6-like
s2f_0003725004	0.80916	11.004	3.904	0.0028837	0.13062	-1.5315	s2f_0003725004	syncytin-a-like
s2f_0003264003	-0.8089	1.3409	-1.0139	0.33429	0.7764	-5.9037	SH2B3	sh2b adapter protein 3
s2f_0002749001	-0.80885	4.1935	-1.5235	0.1583	0.69342	-5.3117	PLEKHG1	pleckstrin homology domain-containing family g member 1 isoform x1
s2f_0011303001	0.80829	4.8916	3.242	0.0087221	0.2191	-2.6141	FGFBP2	fibroblast growth factor-binding protein 2
s2f_0011828001	0.80758	-2.5353	1.2455	0.24106	0.75123	-5.656	ZCCHC3	zinc finger cchc domain-containing protein 3
s2f_0008805048	-0.80744	-1.4044	-0.79734	0.44359	0.82063	-6.0973	s2f_0008805048	uncharacterized protein loc107570329
s2f_0003376001	-0.8073	-1.1985	-0.71206	0.49254	0.83643	-6.1624	XGB	neuroglobin-like
s2f_0000169006	-0.80705	-1.2008	-1.2431	0.24191	0.75123	-5.6588	TUBB3	tubulin beta-1 chain
s2f_0003719002	-0.80621	2.6448	-3.5267	0.0053893	0.17589	-2.1443	AGMAT	agmatinase, mitochondrial
s2f_0001251011	-0.80604	7.8069	-5.1938	0.00039139	0.04366	0.42414	C3	complement c3-like
s2f_0009058001	0.80554	-0.51981	0.70343	0.49767	0.83774	-6.1687	XRRA1	x-ray radiation resistance-associated protein 1
s2f_0000006056	-0.8054	3.9379	-2.2391	0.048816	0.47093	-4.2603	KIF16B	kinesin-like protein kif16b isoform x1
s2f_0000250012	-0.80521	1.3761	-1.4248	0.18437	0.72099	-5.4392	DGKG	diacylglycerol kinase gamma isoform x1
s2f_0000206041	0.8052	-0.15769	1.6608	0.12743	0.65389	-5.1258	CLDNJ	claudin-4-like
s2f_0002424014	0.8052	-2.729	1.0345	0.32501	0.77568	-5.8832	MPHOSPH8	m-phase phosphoprotein 8 isoform x1
s2f_0000084012	0.80517	0.064105	2.6942	0.022342	0.34753	-3.5225	MSC	musculin
s2f_0007318002	-0.80514	2.6727	-1.432	0.18233	0.71859	-5.43	TMEM163	transmembrane protein 163-like
s2f_0002367003	-0.80483	-1.1998	-0.6533	0.52814	0.84874	-6.2034	NXPH3	neurexophilin-1-like
s2f_0003921002	0.80408	5.4734	6.5808	5.9272e-05	0.015948	2.2394	ZGC:77151	at-rich interactive domain-containing protein 5b-like
s2f_0018196001	0.80407	-0.76124	1.3087	0.21962	0.74045	-5.5819	s2f_0018196001	(genbank) hypothetical protein
s2f_0003213001	-0.80367	2.0436	-2.0781	0.064113	0.52354	-4.5118	PHF19	phd finger protein 19
s2f_0005062001	-0.80353	3.4054	-3.6321	0.0045189	0.16429	-1.9719	TMEM97	sigma intracellular receptor 2
s2f_0004667004	-0.80346	1.0217	-3.3659	0.0070672	0.19932	-2.4091	SI:CH73-330K17.3	cysteine-rich motor neuron 1 protein-like
s2f_0016517001	-0.8033	1.0708	-1.716	0.11661	0.64331	-5.0486	SI:CH73-29C22.1	kelch-like protein 20
s2f_0005311005	0.80306	4.8098	3.7024	0.0040199	0.15447	-1.8572	BACH1B	transcription regulator protein bach1-like
s2f_0004166003	-0.80298	0.18413	-1.8511	0.09356	0.59563	-4.8538	UPP2	uridine phosphorylase 2
s2f_0009059004	-0.80261	-0.85158	-1.1259	0.28625	0.76794	-5.7888	ZFP57	zinc finger protein 668-like
s2f_0001576009	-0.80228	3.1833	-4.5803	0.00098309	0.070992	-0.47571	FA55C	nxpe family member 3-like
s2f_0001743002	0.80125	8.3763	4.1262	0.0020115	0.1054	-1.178	PFKM	atp-dependent 6-phosphofructokinase, muscle type-like
s2f_0001723004	0.8011	-1.3799	1.5413	0.15396	0.6876	-5.2881	SEC61A2	protein transport protein sec61 subunit alpha
s2f_0000406016	-0.80104	-1.606	-1.1777	0.26592	0.76102	-5.7325	EPX	eosinophil peroxidase-like
s2f_0000270016	-0.8008	2.741	-1.2569	0.23706	0.7511	-5.6428	EPHB3	ephrin type-b receptor 3-like isoform x1
s2f_0012364001	-0.80057	-2.0259	-1.0343	0.32513	0.77568	-5.8835	CUNH11ORF80	type 2 dna topoisomerase 6 subunit b-like
s2f_0025825001	0.80036	-1.6404	1.1163	0.29013	0.76949	-5.799	K23	k23
s2f_0000047031	-0.80027	-0.96526	-1.1852	0.26308	0.75963	-5.7242	SYMBB.V1.2.009509.T1	protein nlrc3-like
s2f_0000895009	0.80024	2.9466	3.4373	0.0062641	0.18813	-2.2913	S1PR5B	sphingosine 1-phosphate receptor 1-like
s2f_0015918001	0.80019	4.0088	5.2893	0.00034074	0.040105	0.55895	SI:CH211-79K12.1	vascular endothelial growth factor receptor 3-like
s2f_0000343018	-0.79987	-1.4	-1.8583	0.092464	0.59243	-4.8433	TAAR12A	trace amine-associated receptor 4-like
s2f_0009042001	-0.7995	0.46684	-2.5485	0.028722	0.38929	-3.7618	PIK3R5	phosphoinositide 3-kinase regulatory subunit 5 isoform x1
s2f_0000336003	-0.79915	-0.61696	-1.4051	0.18997	0.72581	-5.4639	LPAR5	lysophosphatidic acid receptor 5
s2f_0003533002	-0.79911	4.6991	-2.3234	0.042269	0.45218	-4.126	AASS	alpha-aminoadipic semialdehyde synthase, mitochondrial
s2f_0002744004	-0.79911	0.30325	-2.1512	0.056675	0.50278	-4.3985	TMC1	transmembrane channel-like protein 1
s2f_0002479001	0.79863	3.5735	4.5844	0.00097683	0.070882	-0.46944	FAM83E	protein fam83e
s2f_0006005054	0.79731	-0.57618	1.3833	0.19636	0.72876	-5.4911	s2f_0006005054	gastrula zinc finger protein xlcgf52.1-like
s2f_0001888001	-0.79726	0.99028	-1.7823	0.10472	0.62413	-4.9539	GOLT1A	vesicle transport protein got1a
s2f_0155931001	0.79705	-1.6794	1.1442	0.27892	0.76501	-5.7691	s2f_0155931001	(genbank) unnamed protein product
s2f_0000622012	0.79658	-1.7964	1.2403	0.24291	0.75133	-5.662	IRF1A	interferon regulatory factor 1-like
s2f_0335915001	-0.79616	1.4245	-1.8615	0.09197	0.59223	-4.8385	s2f_0335915001	uncharacterized protein im:7145975
s2f_0004374004	-0.79593	-2.5089	-1.7273	0.11449	0.63876	-5.0324	DAZL	deleted in azoospermia-like
s2f_0000367006	-0.79593	-3.1359	-0.61699	0.55089	0.85756	-6.2272	ZGLP1	gata-type zinc finger protein 1
s2f_0004094003	-0.79582	-0.31341	-1.264	0.23461	0.75066	-5.6346	RXFP3	relaxin-3 receptor 1
s2f_0002267017	-0.79569	-0.50108	-1.7272	0.11452	0.63876	-5.0327	OR115-2	olfactory receptor 146-like
s2f_0001943004	-0.79557	6.2411	-4.6474	0.00088658	0.067879	-0.37448	ADA	adenosine deaminase
s2f_0000611001	-0.79547	1.917	-1.5859	0.14352	0.67413	-5.2283	TFR2	transferrin receptor protein 2
s2f_0001697006	-0.79539	3.2844	-4.0665	0.0022145	0.11015	-1.2724	DAO	d-amino-acid oxidase
s2f_0005035001	0.79532	-0.76043	1.3032	0.22143	0.74118	-5.5885	s2f_0005035001	hypothetical protein
s2f_0011898001	0.79506	7.5133	3.4793	0.0058364	0.18414	-2.2222	CCER1	coiled-coil domain-containing glutamate-rich protein 1
s2f_0000485008	0.79471	2.857	2.7764	0.019391	0.31922	-3.3868	SLC5A12	sodium-coupled monocarboxylate transporter 2
s2f_0005864001	-0.79389	2.2896	-2.1061	0.06116	0.51961	-4.4686	SI:CH211-161C3.5	uncharacterized protein c3orf18 homolog isoform x1
s2f_0012398001	-0.79335	0.068868	-1.6004	0.14027	0.66875	-5.2087	PTH2	tuberoinfundibular peptide of 39 residues
s2f_0000016029	0.79194	-1.1913	1.2839	0.22785	0.74581	-5.6113	s2f_0000016029	--
s2f_0008864002	0.79165	-0.65004	2.2672	0.046528	0.46593	-4.2156	LRRC34	leucine-rich repeat-containing protein 34 isoform x1
s2f_0001058012	-0.7913	-2.5309	-0.68217	0.51046	0.84286	-6.1837	CRYBB2	beta-crystallin b2
s2f_0010646001	-0.79088	1.238	-1.348	0.20708	0.73397	-5.5344	TBATA	protein tbata
s2f_0004531002	-0.79057	3.1574	-2.1931	0.052782	0.48744	-4.3327	INTS6L	integrator complex subunit 6-like
s2f_0000242014	-0.79054	2.2535	-1.2616	0.23543	0.75066	-5.6373	CLVS2	clavesin-2
s2f_0000185027	-0.78915	-0.11779	-1.6434	0.131	0.65824	-5.1498	KISS1R	g-protein coupled receptor 54-like
s2f_0000072004	-0.78826	2.0187	-3.4734	0.0058948	0.18473	-2.2319	ABCG5	atp-binding cassette sub-family g member 5
s2f_0000343034	-0.78791	-1.4898	-1.1687	0.26937	0.76139	-5.7424	TAAR10	trace amine-associated receptor 1-like
s2f_0006779002	-0.78787	0.98974	-1.2567	0.23712	0.7511	-5.643	FAM83C	protein fam83c
s2f_0000092006	-0.78761	3.9625	-2.4619	0.033335	0.41379	-3.9028	SULT1ST6	sulfotransferase 1c1-like
s2f_0004195001	0.78754	-0.24616	1.5713	0.14686	0.67965	-5.248	RFXANK	dna-binding protein rfxank isoform x1
s2f_0000508012	-0.78742	1.36	-1.0685	0.31014	0.77293	-5.8488	B4GALT2	beta-1,4-galactosyltransferase 2
s2f_0002557004	-0.78731	1.6479	-1.8009	0.1016	0.61826	-4.9271	POPDC3	popeye domain-containing protein 3
s2f_0003636001	-0.7869	1.677	-2.8922	0.015885	0.2917	-3.195	UNC119.2	protein unc-119 homolog
s2f_0000048015	0.78687	2.7322	2.944	0.014528	0.28204	-3.1089	CTS12	cathepsin l1-like
s2f_0000127015	-0.78685	-0.3503	-1.9116	0.084672	0.57625	-4.7644	NPR1	atrial natriuretic peptide receptor 1-like
s2f_0005037002	-0.78648	4.5142	-1.1315	0.28397	0.76776	-5.7827	FRMD4A	ferm domain-containing protein 4a isoform x1
s2f_0006404003	-0.78635	2.0317	-1.7319	0.11365	0.63796	-5.026	ZNF512	zinc finger protein 512
s2f_0009072001	-0.78588	1.7496	-1.1609	0.27237	0.76139	-5.7509	WDR31	wd repeat-containing protein 31
s2f_0006005007	-0.78586	-0.12368	-3.1562	0.010097	0.23545	-2.7564	s2f_0006005007	gastrula zinc finger protein xlcgf52.1-like
s2f_0000863051	-0.78412	-2.2328	-1.2205	0.24997	0.75394	-5.6845	s2f_0000863051	low quality protein: uncharacterized protein loc101080019
s2f_0000142009	0.78378	-0.16384	2.7524	0.02021	0.32694	-3.4265	LMO4	lim domain transcription factor lmo4
s2f_0000644008	0.78349	3.5276	3.5693	0.0050186	0.17012	-2.0745	NENF	neudesin
s2f_0005441006	-0.78327	-1.9252	-1.109	0.29314	0.77013	-5.8067	BDKRB2	b2 bradykinin receptor-like
s2f_0007362001	-0.7832	3.3032	-2.6498	0.024121	0.35926	-3.5957	KIAA1211L	uncharacterized protein kiaa1211-like homolog
s2f_0003453001	-0.78273	1.231	-1.8152	0.099233	0.61122	-4.9062	NT5DC3	5'-nucleotidase domain-containing protein 3
s2f_0003120003	-0.78263	3.0765	-2.1905	0.053019	0.48744	-4.3369	ARHGAP18	rho gtpase-activating protein 18 isoform x1
s2f_0000164016	0.78228	2.7782	4.0855	0.0021477	0.10846	-1.2423	ZGC:174164	disintegrin and metalloproteinase domain-containing protein 9-like
s2f_0012267001	-0.78226	3.1624	-1.7879	0.10377	0.62354	-4.9459	APLN	apelin
s2f_0005687001	-0.78201	3.7659	-1.3647	0.20197	0.73115	-5.5141	PRDM1B	pr domain zinc finger protein 1-like isoform x1
s2f_0001717001	-0.78176	0.24284	-1.1542	0.27498	0.76244	-5.7582	RUNX3	runt-related transcription factor 3
s2f_0021213001	-0.78163	-0.10166	-1.2249	0.24841	0.75304	-5.6796	s2f_0021213001	actin cytoskeleton-regulatory complex protein pan1-like
s2f_0009687002	-0.78145	0.48039	-1.8494	0.093822	0.59614	-4.8563	MSANTD4	myb/sant-like dna-binding domain-containing protein 4
s2f_0009176001	-0.78133	0.55933	-2.5364	0.029328	0.39114	-3.7816	ANKMY1	ankyrin repeat and mynd domain-containing protein 1
s2f_0000913003	-0.78123	-0.047959	-1.3242	0.21459	0.73924	-5.5632	SRD5A1	3-oxo-5-alpha-steroid 4-dehydrogenase 1
s2f_0000653006	0.78099	1.4093	3.2758	0.0082344	0.21407	-2.5581	TNFRSF1B	tumor necrosis factor receptor superfamily member 1b-like
s2f_0000313029	-0.7809	-1.5552	-0.86905	0.40499	0.80344	-6.0375	s2f_0000313029	uncharacterized protein
s2f_0002508001	-0.78069	2.2248	-1.1245	0.2868	0.76794	-5.7902	REPS2	ralbp1-associated eps domain-containing protein 2 isoform x1
s2f_0000169012	-0.78049	1.0721	-2.6469	0.024243	0.35926	-3.6005	TUBB1	tubulin beta-1 chain
s2f_0002881001	-0.78033	2.0828	-2.6298	0.024968	0.36662	-3.6286	MOCS1	molybdenum cofactor biosynthesis protein 1 isoform x1
s2f_0000424004	0.78019	-0.79435	1.2666	0.2337	0.75066	-5.6315	CRYGS	beta-crystallin s
s2f_0000420004	-0.77979	0.37631	-1.8351	0.096063	0.60436	-4.8774	SI:DKEY-106N21.1	solute carrier family 23 member 2-like
s2f_0044460001	-0.77973	1.7608	-3.2531	0.0085588	0.21732	-2.5957	ZGC:113229	protein starmaker-like
s2f_0000157008	-0.77928	2.7948	-2.1839	0.053613	0.48896	-4.3472	SLC25A25B	calcium-binding mitochondrial carrier protein scamc-2-b isoform x1
s2f_0000096001	0.77928	-2.6875	0.88785	0.39526	0.80057	-6.0211	B34	histone h3.2
s2f_0000197017	0.77912	6.0094	5.1593	0.00041162	0.045242	0.37507	CAPN8	calpain-2 catalytic subunit-like
s2f_0061217001	-0.7791	0.8946	-1.2439	0.24161	0.75123	-5.6578	SI:CH211-108C6.2	microtubule-associated protein futsch-like
s2f_0000134001	-0.77851	1.8332	-1.6613	0.12732	0.65364	-5.1251	KCNK10	potassium channel subfamily k member 10-like
s2f_0335872001	-0.77824	2.9663	-2.0362	0.068794	0.5347	-4.5763	R3HDM1	uncharacterized protein r3hdm1 isoform x1
s2f_0000105004	0.77784	6.1325	2.5691	0.02772	0.38473	-3.7281	MMP13A	collagenase 3-like
s2f_0010934001	-0.77762	3.2751	-1.5274	0.15732	0.69228	-5.3065	NYAP1	neuronal tyrosine-phosphorylated phosphoinositide-3-kinase adapter 1 isoform x1
s2f_0000273001	0.77748	0.73034	1.9324	0.081809	0.57037	-4.7334	FGC6AST2	low choriolytic enzyme-like
s2f_0005036003	-0.77718	0.26173	-2.1181	0.059932	0.51479	-4.45	SI:DKEY-16N15.6	organic solute transporter subunit alpha-like
s2f_0002259001	0.77709	1.2852	1.6441	0.13086	0.65824	-5.1488	RPL29	60s ribosomal protein l29-like
s2f_0000604004	0.77688	4.935	3.5867	0.0048747	0.16832	-2.0461	SCARB1	scavenger receptor class b member 1 isoform x1
s2f_0010341001	0.77646	0.92283	3.0488	0.012136	0.25732	-2.9349	BSPRY	b box and spry domain-containing protein
s2f_0001673005	0.77645	3.8525	5.213	0.00038058	0.043097	0.4514	PLTP	phospholipid transfer protein
s2f_0037592001	-0.77633	2.9753	-2.0498	0.067243	0.53052	-4.5554	s2f_0037592001	serine/threonine-protein kinase pim-2-like
s2f_0009010002	-0.77609	-1.8324	-0.76982	0.45903	0.82542	-6.119	WU:FC27B11	uncharacterized protein wu:fc27b11
s2f_0003192002	-0.77585	4.1373	-1.1831	0.26386	0.75982	-5.7265	MTCL1	microtubule cross-linking factor 1 isoform x1
s2f_0001269009	-0.77574	0.76317	-1.8658	0.091334	0.59212	-4.8323	PLA2G4C	cytosolic phospholipase a2 gamma-like
s2f_0005840001	-0.7755	-0.87378	-1.8327	0.096428	0.60487	-4.8807	TMEM255B	transmembrane protein 255b
s2f_0091319001	0.77528	0.51617	3.2606	0.0084507	0.21667	-2.5833	s2f_0091319001	gtpase imap family member 8-like
s2f_0001615005	-0.77464	-1.9557	-1.2683	0.23314	0.75066	-5.6296	PPP3CA	serine/threonine-protein phosphatase 2b catalytic subunit alpha isoform isoform x1
s2f_0002243004	-0.77304	-0.60703	-1.3567	0.2044	0.73205	-5.5238	s2f_0002243004	dead-box atp-dependent rna helicase 40-like
s2f_0004385003	-0.77281	2.4583	-1.4974	0.16487	0.70251	-5.346	RALGPS2	ras-specific guanine nucleotide-releasing factor ralgps2 isoform x1
s2f_0020199001	-0.77258	4.1097	-3.1231	0.010685	0.24262	-2.8114	SI:CH211-217G15.3	uncharacterized protein si:ch211-217g15.3
s2f_0000000095	-0.77218	-0.58952	-1.7147	0.11686	0.64331	-5.0504	s2f_0000000095	uncharacterized protein k02a2.6-like
s2f_0000571005	0.77166	6.1795	6.3743	7.723e-05	0.017396	1.9881	TRPM4	transient receptor potential cation channel subfamily m member 4-like
s2f_0001033006	-0.77138	0.56056	-1.1409	0.28024	0.76527	-5.7727	CACNG4	voltage-dependent calcium channel gamma-4 subunit
s2f_0002535003	0.77126	4.9908	5.2287	0.00037203	0.042777	0.4735	EGLN1	egl nine homolog 1
s2f_0024987001	0.77124	7.1969	2.9992	0.013213	0.26799	-3.0172	s2f_0024987001	uncharacterized protein loc100535760
s2f_0003525002	-0.77091	3.6942	-2.6954	0.022298	0.34719	-3.5206	ZGC:73226	bcl2/adenovirus e1b 19 kda protein-interacting protein 3-like
s2f_0000970015	0.77005	0.70044	3.4241	0.006406	0.18962	-2.3132	TNFA	tumor necrosis factor-like
s2f_0004535004	-0.76979	2.3513	-2.0084	0.072065	0.54188	-4.6186	ANKFN1L	ankyrin repeat and fibronectin type-iii domain-containing protein 1-like
s2f_0001280002	0.76965	2.7804	3.0385	0.012353	0.25966	-2.952	PITPNC1B	cytoplasmic phosphatidylinositol transfer protein 1
s2f_0000062046	-0.76935	3.5684	-1.1764	0.26642	0.76113	-5.734	SLC6A15	sodium-dependent neutral amino acid transporter b(0)at2
s2f_0000031023	0.76918	3.7433	3.1182	0.010775	0.24314	-2.8196	FOXF2	forkhead box protein f2-like
s2f_0000551005	-0.76908	2.8556	-1.9756	0.076133	0.55281	-4.6684	TRAF2	tnf receptor-associated factor 2
s2f_0018791001	-0.76902	1.7304	-2.7084	0.021803	0.34416	-3.4992	s2f_0018791001	--
s2f_0000313041	-0.76815	-0.78697	-1.2787	0.2296	0.74709	-5.6174	s2f_0000313041	craniofacial development protein 2-like
s2f_0109275001	0.76793	-0.36271	1.4659	0.1731	0.70696	-5.3868	s2f_0109275001	dual specificity phosphatase dupd1-like
s2f_0000416017	0.76756	1.3153	2.3862	0.037963	0.43485	-4.0253	ITGAE	integrin alpha-9-like
s2f_0000403007	0.76748	-0.79326	1.4333	0.18197	0.71841	-5.4284	HMGB1	high mobility group protein b1
s2f_0000274016	-0.76717	3.5848	-1.0576	0.31487	0.77365	-5.86	SLC7A5	large neutral amino acids transporter small subunit 1
s2f_0006438003	0.76712	2.6187	3.6482	0.004399	0.16236	-1.9455	IFI35	interferon-induced 35 kda protein
s2f_0002814002	-0.76639	3.113	-1.3212	0.21557	0.73924	-5.5669	TSPOAP1	rims-binding protein 2-like
s2f_0006702001	-0.7663	2.9	-3.864	0.0030794	0.1342	-1.5959	PTS	6-pyruvoyl tetrahydrobiopterin synthase
s2f_0006463002	-0.76582	4.3358	-3.8408	0.0031985	0.13778	-1.6331	MTTP	microsomal triglyceride transfer protein large subunit
s2f_0001466004	-0.76526	-0.0054834	-0.67473	0.51498	0.84408	-6.1889	SI:CH211-37E10.1	g2/m phase-specific e3 ubiquitin-protein ligase-like
s2f_0000023065	-0.7648	-0.022905	-1.0355	0.3246	0.77568	-5.8823	s2f_0000023065	zinc-binding protein a33-like
s2f_0174653001	0.76468	-3.7739	1.0954	0.29874	0.77068	-5.8209	s2f_0174653001	nacht, lrr and pyd domains-containing protein 3-like isoform x1
s2f_0010868001	0.76468	-1.8284	1.0299	0.3271	0.77568	-5.8879	REP15	rab15 effector protein
s2f_0005859001	0.76436	1.3391	2.5221	0.030059	0.39524	-3.805	OXLD1	oxidoreductase-like domain-containing protein 1
s2f_0000420010	-0.76435	3.0811	-3.0441	0.012233	0.2588	-2.9426	ZGC:110789	solute carrier family 23 member 1-like
s2f_0009146002	-0.76425	0.8987	-1.0223	0.33047	0.77568	-5.8953	MBLAC2	metallo-beta-lactamase domain-containing protein 2
s2f_0016423001	0.76378	-1.1202	1.3672	0.20122	0.73043	-5.511	ZNF208	zinc finger protein 708-like
s2f_0000673030	0.7632	-0.48385	1.9105	0.084832	0.57637	-4.7661	s2f_0000673030	high affinity immunoglobulin gamma fc receptor i-like
s2f_0005999002	-0.76306	-0.68324	-1.2105	0.25362	0.75475	-5.6958	KLHDC8B	kelch domain-containing protein 8b
s2f_0000052016	-0.76278	5.621	-2.7579	0.020019	0.32597	-3.4174	SERPINB1	leukocyte elastase inhibitor-like
s2f_0001596006	-0.76259	3.9372	-3.6508	0.0043801	0.16206	-1.9413	EPS8L2	epidermal growth factor receptor kinase substrate 8-like protein 2 isoform x1
s2f_0002843005	-0.76216	-0.24209	-1.0615	0.31319	0.77328	-5.856	NR5A1	nuclear receptor subfamily 5 group a member 2-like
s2f_0005408002	0.76213	7.1582	2.8794	0.016237	0.2924	-3.2162	PPP1R15A	protein phosphatase 1 regulatory subunit 15a
s2f_0000472009	-0.76168	4.5417	-1.1253	0.28647	0.76794	-5.7894	PCSK1	neuroendocrine convertase 1
s2f_0018185001	0.76121	2.1647	2.9211	0.015114	0.2867	-3.147	s2f_0018185001	fibroin heavy chain-like
s2f_0000206022	0.7608	0.75393	2.4879	0.031878	0.4056	-3.8606	SI:CH211-181L5.2	claudin-10-like
s2f_0000135018	0.76074	-0.043904	1.9859	0.074838	0.55047	-4.6529	FTR87	e3 ubiquitin/isg15 ligase trim25-like
s2f_0019314001	0.76074	-4.0483	1.3357	0.21096	0.73616	-5.5494	MGC137454	camp-specific 3',5'-cyclic phosphodiesterase 4d-like
s2f_0005514005	0.76074	-2.2749	1.2201	0.25014	0.75408	-5.685	ANKRD2	ankyrin repeat domain-containing protein 2
s2f_0000863021	0.76074	-2.1139	0.9875	0.34645	0.78111	-5.9293	NITR1A	immunoglobulin superfamily member 3-like
s2f_0000016141	0.76074	-3.3265	0.90878	0.38463	0.79749	-6.0025	s2f_0000016141	uncharacterized protein loc106512188
s2f_0001244011	0.76074	-3.0311	0.89781	0.39018	0.79944	-6.0123	ZPD	uromodulin-like
s2f_0000277020	0.76074	-2.8144	0.71603	0.49018	0.83597	-6.1595	s2f_0000277020	zinc finger protein ozf-like
s2f_0008368001	-0.76045	2.0528	-2.009	0.072003	0.54188	-4.6178	PLEKHJ1	pleckstrin homology domain-containing family j member 1
s2f_0000651011	-0.76028	2.0195	-2.2787	0.045626	0.46326	-4.1974	SLC24A1	sodium/potassium/calcium exchanger 1 isoform x1
s2f_0083171001	-0.75999	0.35089	-2.223	0.050172	0.47799	-4.2857	s2f_0083171001	eukaryotic translation initiation factor 4 gamma 1-like
s2f_0000000141	-0.75961	-1.3124	-0.80971	0.43676	0.81806	-6.0873	LJ0G3V0142189.1	uncharacterized protein k02a2.6-like
s2f_0018105001	0.75948	3.5129	3.5313	0.005348	0.1752	-2.1367	s2f_0018105001	uncharacterized loc100555274
s2f_0000178011	-0.75828	3.2597	-5.3597	0.00030791	0.038039	0.65736	LIPC	hepatic triacylglycerol lipase
s2f_0000622005	0.75816	2.7512	3.6134	0.0046617	0.16562	-2.0023	IRF5	interferon regulatory factor 5
s2f_0030028001	-0.75802	0.56534	-1.7637	0.10793	0.62821	-4.9806	MLNL	motilin-like isoform x1
s2f_0004630002	-0.75775	3.1993	-1.1492	0.27696	0.76349	-5.7637	ARID4B	at-rich interactive domain-containing protein 4b isoform x1
s2f_0005851002	0.75738	2.3657	3.4083	0.0065789	0.19326	-2.3392	ULK4	serine/threonine-protein kinase ulk4 isoform x1
s2f_0001863008	0.75736	2.1049	2.4713	0.032802	0.41135	-3.8876	WU:FD46G04	endonuclease domain-containing 1 protein-like
s2f_0001124009	0.75723	-0.7879	1.3994	0.19164	0.72831	-5.4711	CHRM1	muscarinic acetylcholine receptor m1
s2f_0000336031	0.75707	-1.2156	1.0276	0.32809	0.77568	-5.8901	P2RY11	p2y purinoceptor 11
s2f_0011100001	-0.75685	-0.89854	-1.765	0.1077	0.62791	-4.9787	CUNH8ORF88	uncharacterized protein c8orf88 homolog
s2f_0000865002	-0.75645	0.58665	-2.26	0.047103	0.46795	-4.227	PRDM14	pr domain zinc finger protein 14
s2f_0335845001	0.75562	-2.2116	0.79007	0.44763	0.82292	-6.1031	s2f_0335845001	uncharacterized protein loc110437899
s2f_0015997001	-0.75541	-3.3739	-0.7943	0.44527	0.82092	-6.0997	CAIAP	ankyrin-1-like
s2f_0015818001	-0.75541	-1.9393	-0.75947	0.46492	0.82704	-6.127	TMIGD2	transmembrane and immunoglobulin domain-containing protein 2
s2f_0150447001	-0.75541	-2.6672	-0.74396	0.47384	0.83123	-6.1388	s2f_0150447001	uncharacterized protein loc109195871 isoform x2
s2f_0009305001	-0.75541	-1.4585	-0.69919	0.50021	0.83834	-6.1717	s2f_0009305001	immunoglobulin kappa light chain-like
s2f_0335919001	-0.75541	-2.6288	-0.66566	0.52053	0.84612	-6.1951	s2f_0335919001	uncharacterized protein loc101883499 isoform x2
s2f_0004695003	-0.75531	3.5979	-1.7052	0.11864	0.64546	-5.0637	MMD	monocyte to macrophage differentiation factor isoform x1
s2f_0000138014	0.75518	0.20553	1.6401	0.13169	0.65859	-5.1543	SLC26A7	anion exchange transporter
s2f_0003542002	-0.75498	3.5374	-1.2886	0.22626	0.74409	-5.6057	ASXL2	putative polycomb group protein asxl2 isoform x1
s2f_0001216003	-0.75469	1.6216	-1.8375	0.095684	0.60324	-4.8738	ADORA1	adenosine receptor a1
s2f_0001135007	-0.75413	1.0123	-2.0298	0.069539	0.53471	-4.5861	TRPV1	transient receptor potential cation channel subfamily v member 1-like
s2f_0000745012	-0.75352	4.8664	-1.2298	0.24663	0.75238	-5.674	DSCAML1	down syndrome cell adhesion molecule-like protein 1
s2f_0000974008	-0.75305	3.2661	-1.2946	0.22425	0.74293	-5.5986	ZC3H12B	probable ribonuclease zc3h12b
s2f_0057080001	-0.75291	-0.70671	-1.3646	0.20199	0.73115	-5.5142	SI:CH211-135N15.2	sulfated surface glycoprotein 185-like
s2f_0009100001	-0.75277	-0.9802	-1.4108	0.18833	0.72474	-5.4567	SH3BP2	sh3 domain-binding protein 2 isoform x1
s2f_0080349001	-0.7526	1.7612	-1.8406	0.09519	0.60165	-4.8692	s2f_0080349001	--
s2f_0001535008	-0.75246	3.5499	-1.2222	0.24936	0.75392	-5.6826	CPEB2	cytoplasmic polyadenylation element-binding protein 2 isoform x1
s2f_0000894009	0.75245	-1.8361	0.89349	0.39238	0.8005	-6.0162	TLE1	transducin-like enhancer protein 1 isoform x1
s2f_0005910001	-0.75204	2.2539	-3.2822	0.0081464	0.21326	-2.5476	AANAT	serotonin n-acetyltransferase
s2f_0000186012	0.75203	1.1914	3.0011	0.013172	0.26752	-3.0142	ZMP:0000001301	hypothetical protein
s2f_0000600002	-0.75159	4.9038	-5.8639	0.00015216	0.023922	1.3389	PDE5A	cgmp-specific 3',5'-cyclic phosphodiesterase isoform x1
s2f_0000199021	-0.7515	-2.1688	-0.70787	0.49503	0.83727	-6.1655	CSMD1A	cub and sushi domain-containing protein 1-like
s2f_0010786001	-0.75144	-0.81965	-0.8788	0.39992	0.80183	-6.0291	RD3L	protein rd3-like
s2f_0002832004	0.75138	3.722	2.6431	0.0244	0.3604	-3.6066	PSME1	proteasome activator complex subunit 1
s2f_0006229002	0.75136	-0.71507	0.99372	0.34356	0.78021	-5.9233	ADPGK2	adp-dependent glucokinase
s2f_0000270024	-0.75121	2.341	-1.2219	0.24947	0.75392	-5.6829	EPHA10	ephrin type-a receptor 7-like
s2f_0005334001	-0.75109	0.82235	-2.4945	0.03152	0.40359	-3.8499	METTL4	methyltransferase-like protein 4
s2f_0002618002	-0.75034	1.1917	-1.029	0.32748	0.77568	-5.8887	SRRM3	serine/arginine repetitive matrix protein 3
s2f_0000097018	-0.75029	-1.786	-0.80978	0.43672	0.81806	-6.0873	AFH14	formin-like protein 20
s2f_0002832001	0.74996	3.02	4.1825	0.0018378	0.101	-1.0894	PSME2	proteasome activator complex subunit 2
s2f_0000049001	-0.74959	1.5266	-2.1781	0.05415	0.49194	-4.3564	SLC22A13	solute carrier family 22 member 13-like
s2f_0000653015	0.74905	0.10633	1.0568	0.3152	0.77365	-5.8608	OPGA	tumor necrosis factor receptor superfamily member 6b-like
s2f_0000302024	0.74859	5.0139	2.8462	0.017194	0.30138	-3.2713	S100-A11, S10AB	protein s100-a11-like
s2f_0001306001	0.7482	1.6704	2.5426	0.029015	0.39066	-3.7714	SI:CH211-229N2.7	hras-like suppressor 2
s2f_0005106001	-0.74796	5.9068	-2.6208	0.025356	0.36941	-3.6433	UOX	uricase
s2f_0000028013	0.74739	-0.39624	2.2359	0.049077	0.47188	-4.2652	SEBOX	hypothetical protein
s2f_0000884003	-0.74724	2.1079	-1.2988	0.22285	0.74228	-5.5936	ANKRD13B	ankyrin repeat domain-containing protein 13b
s2f_0009921001	-0.74696	-0.70317	-1.6747	0.12461	0.64967	-5.1064	FNDC9	fibronectin type iii domain-containing protein 9
s2f_0000604010	-0.74654	5.8355	-3.8747	0.0030254	0.1338	-1.5786	CD36	platelet glycoprotein 4
s2f_0006005035	0.7457	-0.87479	2.1539	0.056411	0.50168	-4.3942	s2f_0006005035	gastrula zinc finger protein xlcgf8.2db-like
s2f_0005451003	0.74495	3.7468	3.4988	0.0056477	0.17924	-2.1901	TMEM272	transmembrane protein 272-like
s2f_0009404002	0.74479	1.5164	2.8221	0.017922	0.30634	-3.3112	SYNC	syncoilin-like
s2f_0109280001	-0.74453	1.5786	-2.6268	0.025096	0.36704	-3.6335	s2f_0109280001	gastrula zinc finger protein xlcgf26.1-like
s2f_0006169003	-0.74447	2.275	-3.8155	0.0033347	0.14161	-1.6741	KIAA0895L	uncharacterized protein kiaa0895-like
s2f_0001206004	-0.74436	1.1688	-2.6018	0.026203	0.37445	-3.6746	AQP7	aquaporin-7
s2f_0000416003	-0.74419	2.0145	-1.1596	0.27289	0.76139	-5.7524	ITGA4	integrin alpha-4
s2f_0001678007	0.74346	1.4855	4.3371	0.0014374	0.088058	-0.84821	EXC-1	interferon-inducible gtpase 5-like
s2f_0003867006	-0.74292	2.033	-2.1472	0.057058	0.50318	-4.4047	TBX21	t-box transcription factor tbx21
s2f_0016030001	-0.74275	-0.078838	-1.0856	0.30289	0.77104	-5.8312	s2f_0016030001	gtpase imap family member 5-like
s2f_0004951004	0.7423	2.6288	3.8843	0.0029786	0.13292	-1.5633	DKK1	dickkopf-related protein 1-like
s2f_0002595002	-0.74194	-0.80587	-1.793	0.10291	0.62202	-4.9385	BLNK	b-cell linker protein isoform x1
s2f_0138519001	-0.74164	0.38211	-1.4161	0.18682	0.72327	-5.4501	s2f_0138519001	rho-associated protein kinase 1-like
s2f_0001905005	-0.74131	3.6038	-2.9616	0.014095	0.2765	-3.0797	C8A	complement component c8 alpha chain
s2f_0005953002	-0.74055	3.72	-1.2987	0.2229	0.74228	-5.5938	SCAP	sterol regulatory element-binding protein cleavage-activating protein isoform x1
s2f_0001772006	-0.74038	-3.132	-0.85525	0.41223	0.80718	-6.0494	TSC22D1	tsc22 domain family protein 1 isoform x1
s2f_0000018002	-0.74038	-3.6208	-0.80964	0.4368	0.81806	-6.0874	MYL1	myosin light chain 1/3, skeletal muscle isoform isoform x1
s2f_0004156004	-0.74038	-2.5927	-0.78619	0.4498	0.82319	-6.1062	BMA-NRD-1	splicing factor, arginine/serine-rich 15 isoform x1
s2f_0000001106	0.74005	1.4559	1.9486	0.079631	0.56441	-4.7091	OVCH1	transmembrane protease serine 9-like
s2f_0007977001	0.7399	-1.8519	0.99772	0.34171	0.78021	-5.9195	TRI25	e3 ubiquitin/isg15 ligase trim25-like
s2f_0000006005	0.73983	-0.12638	1.5835	0.14407	0.67467	-5.2316	KIF28P	kinesin-like protein kif28p
s2f_0000734007	-0.73963	2.9436	-4.4509	0.0012021	0.079081	-0.67282	SLC3A1	neutral and basic amino acid transport protein rbat
s2f_0000002124	0.73917	1.8275	1.6237	0.13519	0.6632	-5.1769	PDX1	pancreas/duodenum homeobox protein 1
s2f_0008805027	0.73876	-2.3869	0.94664	0.36591	0.79117	-5.968	s2f_0008805027	uncharacterized protein loc107567321
s2f_0002007006	-0.73826	2.6838	-1.3856	0.19568	0.72845	-5.4882	PPFIA4	liprin-alpha-4 isoform x1
s2f_0000327012	-0.73736	1.0022	-2.499	0.031277	0.40227	-3.8425	PIP5KL1	phosphatidylinositol 4-phosphate 5-kinase-like protein 1
s2f_0000039016	-0.73736	1.7442	-1.467	0.1728	0.70686	-5.3854	RAB37	ras-related protein rab-37 isoform x1
s2f_0008791001	-0.73714	3.2064	-1.777	0.10562	0.62422	-4.9615	ZGC:158258	specifically androgen-regulated gene protein-like
s2f_0000345010	0.73639	-0.52575	1.7024	0.11919	0.64552	-5.0677	SLCO1B3	solute carrier organic anion transporter family member 1c1-like
s2f_0003198001	0.73639	-2.2345	1.6254	0.13482	0.66194	-5.1746	ISYNA1	inositol-3-phosphate synthase 1
s2f_0006686005	0.73639	-3.16	1.033	0.32568	0.77568	-5.8847	s2f_0006686005	odorant receptor 131-2-like
s2f_0017595001	0.73639	-2.7024	0.93692	0.37065	0.79313	-5.9769	HWA	protein huluwa
s2f_0001486006	0.73639	-2.3484	0.89886	0.38964	0.79928	-6.0114	ASCL4	achaete-scute homolog 4
s2f_0000005005	0.73639	-2.8749	0.55942	0.58806	0.8736	-6.2622	LJ0G3V0322599.1	probable e3 ubiquitin-protein ligase zfp1
s2f_0000202018	0.73634	6.7938	2.343	0.040878	0.44732	-4.0947	MATN1	cartilage matrix protein
s2f_0000108015	0.73601	7.5802	3.2387	0.008771	0.21924	-2.6195	UGT1A1	udp-glucuronosyltransferase-like
s2f_0006471001	0.73556	1.9529	3.3546	0.0072037	0.2009	-2.4277	MAATS1	cilia- and flagella-associated protein 91
s2f_0005887004	-0.73539	1.3505	-1.1598	0.2728	0.76139	-5.7522	CPLX2	complexin-2
s2f_0005879062	-0.73526	-1.9387	-1.1813	0.26454	0.7604	-5.7285	s2f_0005879062	zinc finger protein 239-like
s2f_0009666005	0.73525	-1.5323	1.4992	0.16438	0.70159	-5.3435	ZISUPTON	low quality protein: uncharacterized protein loc116707762
s2f_0004577004	-0.73513	1.4666	-1.3342	0.21143	0.73626	-5.5513	SYT16	synaptotagmin-16 isoform x1
s2f_0001534005	-0.73509	1.3293	-2.4385	0.034705	0.4204	-3.9408	OTOP2	proton channel otop2-like
s2f_0015819001	0.73508	0.44514	1.4805	0.16923	0.70583	-5.3679	CUNH6ORF226	uncharacterized protein c6orf226 homolog
s2f_0007723002	0.73491	-0.76866	1.4549	0.17605	0.71198	-5.4009	LRRC56	leucine-rich repeat-containing protein 56 isoform x1
s2f_0035513001	0.73476	2.3105	3.9244	0.0027892	0.12828	-1.4988	SI:CH211-67E16.2	uncharacterized loc108266094
s2f_0009729001	-0.73436	5.0983	-3.2558	0.0085197	0.21712	-2.5912	RP1L1	retinitis pigmentosa 1-like 1 protein
s2f_0000001129	-0.73415	5.8444	-3.4201	0.0064486	0.1905	-2.3196	F2	prothrombin
s2f_0006993003	-0.73384	2.8687	-2.5609	0.028113	0.38756	-3.7414	SI:DKEYP-72E1.9	syntaxin-binding protein 4-like
s2f_0005364001	0.73357	0.099959	1.7336	0.11333	0.63796	-5.0235	HENMT1	small rna 2'-o-methyltransferase
s2f_0007418002	0.73308	1.8246	2.1432	0.05744	0.50559	-4.4109	TMEM173	stimulator of interferon genes protein
s2f_0002256010	-0.73307	0.33493	-1.2031	0.25638	0.7563	-5.7042	TGFA	protransforming growth factor alpha
s2f_0004423003	0.733	7.0493	5.1502	0.0004171	0.04551	0.36217	EEF2K	eukaryotic elongation factor 2 kinase isoform x1
s2f_0002596002	-0.73287	0.4274	-2.5172	0.030309	0.39524	-3.8128	BARD1	brca1-associated ring domain protein 1
s2f_0010072001	-0.73234	-1.763	-0.90425	0.38691	0.7986	-6.0066	FGF23	fibroblast growth factor 23
s2f_0335864001	0.73232	-0.74747	2.2542	0.04757	0.46795	-4.2362	s2f_0335864001	uncharacterized protein loc110437927
s2f_0000009049	-0.73213	2.503	-1.2249	0.24838	0.75304	-5.6795	MAP3K10	mitogen-activated protein kinase kinase kinase 10
s2f_0006005006	0.73202	-0.062529	1.2217	0.24955	0.75392	-5.6832	s2f_0006005006	gastrula zinc finger protein xlcgf52.1-like
s2f_0001631002	-0.73195	3.4766	-1.212	0.2531	0.75444	-5.6942	MAGIXA	membrane-associated guanylate kinase, ww and pdz domain-containing protein 1-like
s2f_0008383003	-0.73123	-1.5849	-1.1017	0.29613	0.77013	-5.8144	UPK1A	uroplakin-1a
s2f_0001323003	-0.73114	6.4058	-5.5765	0.00022641	0.031049	0.95542	GRK7	rhodopsin kinase
s2f_0000484006	-0.73064	0.38598	-1.3341	0.21144	0.73626	-5.5513	CERS1	ceramide synthase 1
s2f_0004324002	-0.73062	-0.41713	-0.7457	0.47284	0.831	-6.1375	GPR21	probable g-protein coupled receptor 21
s2f_0004337004	-0.73045	0.45645	-2.177	0.054251	0.49194	-4.3581	SI:CH211-254P10.2	solute carrier family 40 member 1-like
s2f_0008244001	0.72977	-0.34703	1.4773	0.17008	0.70686	-5.3721	CFAP300	uncharacterized protein c11orf70 homolog
s2f_0019076001	0.72927	0.49371	1.4906	0.16662	0.70375	-5.3548	SI:DKEY-27H10.2	uncharacterized protein si:dkey-27h10.2 isoform x1
s2f_0000079004	0.72924	6.1116	3.4051	0.0066141	0.19383	-2.3444	SI:CH211-195B15.8	hypothetical protein
s2f_0001190002	-0.72888	-0.34359	-1.0746	0.30753	0.77284	-5.8425	PNPLA4	patatin-like phospholipase domain-containing protein 4 isoform x1
s2f_0002157001	-0.72853	1.4296	-0.79749	0.4435	0.82063	-6.0972	RASA2	ras gtpase-activating protein 2 isoform x1
s2f_0002222004	-0.72844	1.5135	-1.3961	0.19259	0.72831	-5.4752	FXYD6	fxyd domain-containing ion transport regulator 6-like
s2f_0006079003	-0.72812	1.2021	-1.9108	0.084782	0.57637	-4.7656	DEPDC4	dep domain-containing protein 4
s2f_0005332006	-0.72772	-2.8042	-0.92725	0.37541	0.79504	-5.9858	IGD	immunoglobulin gamma-1 heavy chain-like
s2f_0000000084	-0.72772	-2.4647	-0.80005	0.44208	0.82015	-6.0951	s2f_0000000084	uncharacterized protein k02a2.6-like
s2f_0000287021	-0.72767	1.5497	-1.1491	0.27699	0.76349	-5.7638	TBX5	t-box transcription factor tbx5
s2f_0000049039	-0.72739	2.2253	-2.8141	0.01817	0.30795	-3.3244	s2f_0000049039	solute carrier family 22 member 13-like
s2f_0001230007	-0.72715	3.1815	-1.1743	0.2672	0.76114	-5.7362	RAP1GAP	rap1 gtpase-activating protein 1 isoform x1
s2f_0000194004	-0.72707	4.6905	-4.1151	0.0020476	0.10591	-1.1955	SEC14L2	sec14-like protein 2
s2f_0017329001	0.72619	7.3939	5.3264	0.00032302	0.039478	0.61083	CLDNI	claudin-4-like
s2f_0004751004	0.72571	2.611	2.9037	0.015572	0.28987	-3.1758	HEXDC	hexosaminidase d
s2f_0000121030	-0.72535	-0.71378	-1.4289	0.1832	0.71896	-5.434	s2f_0000121030	low quality protein: zinc finger protein 24-like
s2f_0019466001	-0.72528	3.4031	-3.4	0.0066718	0.19417	-2.3529	SI:CH211-276I12.4	(genbank) unnamed protein product
s2f_0005141004	0.72525	2.206	3.291	0.0080249	0.21089	-2.533	GREM2	gremlin-2
s2f_0000421009	-0.72499	3.5278	-2.9742	0.013795	0.27276	-3.0588	CDH19	cadherin-7-like isoform x1
s2f_0007194001	0.7249	2.5307	3.2369	0.0087979	0.21955	-2.6225	INSC	protein inscuteable homolog
s2f_0000701008	-0.72424	0.98433	-3.3327	0.0074765	0.20246	-2.464	SLC10A4	sodium/bile acid cotransporter 4
s2f_0000148003	-0.72421	7.0997	-3.4632	0.0059972	0.18522	-2.2487	ZANL	zonadhesin-like
s2f_0006961001	-0.72388	3.8134	-4.2976	0.0015301	0.091271	-0.90956	HAAO	3-hydroxyanthranilate 3,4-dioxygenase
s2f_0002156004	0.72373	-2.407	1.892	0.087469	0.58136	-4.7936	RPL15B	60s ribosomal protein l15
s2f_0000224018	0.72373	-2.6814	1.3317	0.2122	0.73633	-5.5542	s2f_0000224018	hypothetical protein
s2f_0138520001	0.72373	-2.8246	1.2314	0.24605	0.75238	-5.6721	PIMR93	serine/threonine-protein kinase pim-2-like
s2f_0042805001	0.72373	-1.5745	1.1957	0.25913	0.75886	-5.7125	SI:CH211-285C6.6	uncharacterized protein loc107573372
s2f_0023378001	0.72373	-3.8445	1.1856	0.26292	0.75963	-5.7238	s2f_0023378001	leucine-rich repeat transmembrane protein flrt3-like
s2f_0012774001	0.72373	-4.0483	1.1405	0.28037	0.76527	-5.773	BHMG1	basic helix-loop-helix and hmg box domain-containing protein 1
s2f_0335847001	0.72373	-4.2106	1.1131	0.29143	0.7701	-5.8023	s2f_0335847001	uncharacterized protein loc100333235 isoform x1
s2f_0023571001	0.72373	-3.3961	1.1084	0.29339	0.77013	-5.8074	ARL3L1	sialoadhesin-like
s2f_0000099001	0.72373	-3.6613	1.096	0.29851	0.77068	-5.8204	H2B-1	histone h2b-like
s2f_0002072001	0.72373	-3.732	1.0889	0.30149	0.77104	-5.8278	F14H12.3	hypothetical protein
s2f_0000429010	0.72373	-3.5594	1.0705	0.30931	0.77284	-5.8468	MEC1	hypothetical protein
s2f_0572992001	0.72373	-4.0483	1.0379	0.3235	0.77568	-5.8798	s2f_0572992001	(genbank) unnamed protein product
s2f_0060456001	0.72373	-4.0483	1.0375	0.32371	0.77568	-5.8803	s2f_0060456001	dynein heavy chain domain-containing protein 1-like
s2f_0000070012	0.72373	-4.251	1.0186	0.33215	0.77577	-5.899	DYNC2H1	cytoplasmic dynein 2 heavy chain 1 isoform x1
s2f_0003366001	0.72373	-3.3357	1.0175	0.33265	0.77577	-5.9001	SI:CH211-171H4.5	myelin-associated glycoprotein-like
s2f_0006464001	0.72373	-3.5906	1.0157	0.33345	0.77595	-5.9018	ZAR1L	zar1-like protein
s2f_0004494002	0.72373	-4.1189	1.0004	0.34046	0.78006	-5.9168	PCK2	phosphoenolpyruvate carboxykinase [gtp], mitochondrial
s2f_0000727003	0.72373	-4.0785	0.99679	0.34213	0.78021	-5.9204	DMRT1	doublesex- and mab-3-related transcription factor 1
s2f_0001092005	0.72373	-4.1189	0.99229	0.34422	0.78021	-5.9247	TESMIN	protein lin-54 homolog isoform x1
s2f_0001049014	0.72373	-2.4372	0.98312	0.3485	0.78177	-5.9335	s2f_0001049014	(genbank) unnamed protein product
s2f_0030239001	0.72373	-3.5896	0.98224	0.34891	0.78206	-5.9344	LAG3	procyclic form-specific polypeptide b1-alpha-like
s2f_0002260004	0.72373	-3.8548	0.95248	0.36308	0.78914	-5.9625	NDUFA4	cytochrome c oxidase subunit ndufa4
s2f_0000006007	0.72373	-3.4585	0.94575	0.36634	0.79129	-5.9688	KIF27	kinesin-like protein kif27 isoform x1
s2f_0016814001	0.72373	-4.251	0.93875	0.36975	0.79276	-5.9753	s2f_0016814001	nascent polypeptide-associated complex subunit alpha, muscle-specific form-like
s2f_0027276001	0.72373	-2.8004	0.92075	0.37864	0.79504	-5.9917	s2f_0027276001	(genbank) unnamed protein product
s2f_0010212001	0.72373	-4.0785	0.91781	0.3801	0.7959	-5.9944	ERMN	ermin
s2f_0011771001	0.72373	-2.8446	0.91774	0.38014	0.7959	-5.9945	GHRL	appetite-regulating hormone
s2f_0020196001	0.72373	-3.519	0.90503	0.38652	0.79854	-6.0059	TTC12	uromodulin-like 1
s2f_0000879010	0.72373	-3.7841	0.90135	0.38838	0.79901	-6.0092	SCYB7	c-x-c motif chemokine 11-6-like
s2f_0002912043	0.72373	-4.0171	0.87893	0.39986	0.80183	-6.029	s2f_0002912043	butyrophilin subfamily 2 member a1-like
s2f_0006005017	0.72373	-3.4888	0.86963	0.40468	0.80344	-6.037	s2f_0006005017	zinc finger protein 239-like
s2f_0000000082	0.72373	-3.2921	0.85173	0.41409	0.80873	-6.0524	NEUTE1DRAFT_47326	uncharacterized protein k02a2.6-like
s2f_0000872002	0.72373	-4.1896	0.85072	0.41463	0.80882	-6.0532	LYZ	lysozyme c
s2f_0015245001	0.72373	-1.939	0.8393	0.42071	0.81103	-6.0629	s2f_0015245001	cell surface glycoprotein cd200 receptor 1-a-like
s2f_0011652001	0.72373	-3.3659	0.81987	0.4312	0.81562	-6.079	GPHA2	glycoprotein hormone alpha-2
s2f_0000344033	0.72373	-2.6743	0.81659	0.43299	0.81668	-6.0817	CCL20	c-c motif chemokine 20-like
s2f_0001414003	0.72373	-1.882	0.80771	0.43785	0.81885	-6.0889	EIF5A	hypothetical protein
s2f_0000127003	0.72373	-3.6301	0.78838	0.44857	0.82316	-6.1044	BMA-GCY-28	atrial natriuretic peptide receptor 2-like
s2f_0001004010	0.72373	-3.9254	0.7806	0.45293	0.82396	-6.1106	SNAI1	zinc finger protein snai1
s2f_0021064001	0.72373	-4.1189	0.76888	0.45955	0.82542	-6.1198	s2f_0021064001	nacht, lrr and pyd domains-containing protein 10-like
s2f_0002852002	0.72373	-3.885	0.73659	0.47812	0.83264	-6.1444	NANOS2	nanos homolog 1-like
s2f_0000016038	0.72373	-3.8408	0.73215	0.48071	0.83299	-6.1477	s2f_0000016038	hypothetical protein
s2f_0008805042	0.72373	-2.4519	0.71051	0.49346	0.83704	-6.1636	SI:DKEY-19A16.4	uncharacterized protein loc107698549
s2f_0000063004	0.72373	-2.9659	0.70204	0.49851	0.83778	-6.1697	KCND3	potassium voltage-gated channel subfamily d member 3-like
s2f_0003580001	0.72373	-3.2619	0.69503	0.5027	0.8397	-6.1746	GLI4	zinc finger protein 239-like
s2f_0000277027	0.72373	-3.3326	0.68635	0.50794	0.84185	-6.1808	s2f_0000277027	gastrula zinc finger protein xlcgf57.1-like
s2f_0002504002	0.72373	-1.7519	0.66715	0.51962	0.84527	-6.1941	CREB1	cyclic amp-responsive element-binding protein 1 isoform x1
s2f_0002741002	0.72373	-3.1149	0.55414	0.59153	0.87383	-6.2652	SI:DKEY-197J19.6	neural wiskott-aldrich syndrome protein-like
s2f_0000000007	0.72345	0.29596	1.9033	0.085842	0.57758	-4.7767	LJ1G3V2922660.1	uncharacterized mitochondrial protein atmg00860-like
s2f_0039974001	0.72325	-1.0916	1.7708	0.1067	0.62695	-4.9705	s2f_0039974001	trypsin-7-like
s2f_0000216021	-0.7232	-2.4526	-0.65054	0.52986	0.84939	-6.2053	TLR2	toll-like receptor 2
s2f_0001478007	-0.72277	1.7232	-1.0956	0.29867	0.77068	-5.8207	UNC5B	netrin receptor unc5b isoform x1
s2f_0000865012	-0.7226	-1.8892	-2.6641	0.023533	0.35605	-3.5721	PRDM12	pr domain zinc finger protein 12
s2f_0003759002	-0.7226	-1.3861	-0.90507	0.3865	0.79854	-6.0059	DIRAS2	gtp-binding protein di-ras2
s2f_0001905001	-0.72217	3.377	-4.2569	0.0016322	0.094933	-0.97291	C8B	complement component c8 beta chain
s2f_0001189010	0.72209	2.0348	2.2416	0.048603	0.47054	-4.2562	GRB7	growth factor receptor-bound protein 7-like
s2f_0003193002	-0.72204	5.062	-3.7382	0.0037886	0.14896	-1.7992	SLC34A2A	sodium-dependent phosphate transport protein 2b-like
s2f_0000052002	-0.72166	5.7661	-4.1795	0.0018466	0.10105	-1.0941	SERPINF2	alpha-2-antiplasmin
s2f_0001000005	-0.72131	-0.30623	-0.96532	0.35692	0.78665	-5.9505	ST8SIA2	alpha-2,8-sialyltransferase 8b
s2f_0044463001	0.72071	-0.69598	1.1056	0.29453	0.77013	-5.8103	SCPP1	dentin sialophosphoprotein-like
s2f_0007893001	0.72043	1.8792	2.6779	0.022978	0.35278	-3.5493	MYCBPAP	mycbp-associated protein-like
s2f_0000149034	0.71988	2.0949	2.2077	0.051488	0.48193	-4.3097	COL8A1	collagen alpha-1(viii) chain-like
s2f_0000622014	0.71974	-0.025066	2.2428	0.048505	0.4702	-4.2543	IRF10	interferon regulatory factor 4-like
s2f_0002896005	0.71969	0.43629	2.513	0.030533	0.39584	-3.8198	VGLL3	transcription cofactor vestigial-like protein 3
s2f_0000062005	-0.71935	6.1769	-3.8127	0.00335	0.14186	-1.6785	SLC6A19B	sodium-dependent neutral amino acid transporter b(0)at1-like
s2f_0335829001	0.71931	-1.8612	1.0995	0.29703	0.77021	-5.8166	s2f_0335829001	nacht, lrr and pyd domains-containing protein 12-like
s2f_0006183002	-0.71909	-1.4972	-2.0374	0.06865	0.5347	-4.5744	BM17820	hypothetical protein
s2f_0005670002	0.7185	0.77302	1.0733	0.30809	0.77284	-5.8439	SPATA6L	spermatogenesis associated 6-like protein isoform x1
s2f_0001362011	0.71846	2.1383	2.2975	0.044182	0.45737	-4.1674	PONZR6	placenta-specific gene 8 protein-like
s2f_0000039004	-0.71784	4.5616	-1.1391	0.28096	0.76569	-5.7746	RAB3A	ras-related protein rab-3a
s2f_0000802004	-0.71782	2.4464	-1.7056	0.11858	0.64546	-5.0632	XKR5	xk-related protein 5
s2f_0003496003	0.71752	6.1404	4.2105	0.0017573	0.09875	-1.0454	AGR3	anterior gradient protein 3
s2f_0000047042	-0.71747	0.012063	-1.318	0.21659	0.73924	-5.5707	NLRC3L	stonustoxin subunit beta-like
s2f_0052173001	-0.71713	1.4424	-2.6579	0.023787	0.35807	-3.5824	SI:CH73-299H12.2	gastrula zinc finger protein xlcgf52.1-like isoform x1
s2f_0002459001	-0.71711	6.0371	-1.3358	0.21093	0.73616	-5.5493	TNRC6A	trinucleotide repeat-containing gene 6a protein-like
s2f_0004541004	-0.7167	4.4743	-1.0731	0.30818	0.77284	-5.8441	RUSC1	run and sh3 domain-containing protein 1 isoform x1
s2f_0002123003	0.71655	-0.46513	1.6376	0.13223	0.65997	-5.1579	CCNDX	g1/s-specific cyclin-d2-like
s2f_0001149009	0.71645	2.8461	2.364	0.039437	0.4396	-4.061	ARSE	arylsulfatase f
s2f_0004280005	0.71628	-0.68436	1.7269	0.11457	0.6388	-5.0331	LRRC52	leucine-rich repeat-containing protein 52-like
s2f_0005673002	0.71626	5.2289	4.5593	0.0010155	0.071603	-0.5075	MIEN1	migration and invasion enhancer 1
s2f_0000494002	-0.71626	6.0164	-1.5219	0.15869	0.69361	-5.3138	POLR2A	dna-directed rna polymerase ii subunit rpb1
s2f_0010358001	-0.71618	1.8663	-1.7812	0.10491	0.62417	-4.9556	BMB	protein brambleberry-like
s2f_0006974002	-0.71605	1.8837	-3.3995	0.0066767	0.19417	-2.3536	DNAJC22	dnaj homolog subfamily c member 22
s2f_0005782002	0.71573	1.1046	2.135	0.058249	0.50801	-4.4237	PACRG	parkin coregulated gene protein
s2f_0062503001	-0.71572	2.7572	-1.5269	0.15745	0.6924	-5.3071	s2f_0062503001	serine/threonine-protein kinase wnk2-like
s2f_0000421023	-0.71542	1.3168	-1.263	0.23495	0.75066	-5.6357	CDH22	cadherin-22
s2f_0000200001	0.71537	2.8079	2.7845	0.019121	0.31772	-3.3734	ATF7IP	piggybac transposable element-derived protein 4-like
s2f_0028663001	-0.71501	1.5848	-2.0233	0.070291	0.53767	-4.5959	s2f_0028663001	cd276 antigen-like
s2f_0004481002	-0.71493	-0.90442	-0.86681	0.40616	0.80413	-6.0395	SI:DKEY-148A17.6	leukotriene b4 receptor 1-like
s2f_0001100008	-0.7148	0.97813	-2.7823	0.019193	0.31772	-3.377	s2f_0001100008	low quality protein: uncharacterized protein loc111058104
s2f_0000859008	0.71416	4.726	4.746	0.00076258	0.061952	-0.22699	MAFF	transcription factor maff
s2f_0000273006	-0.71403	5.8257	-2.0066	0.072287	0.54299	-4.6214	C6AST3	high choriolytic enzyme 1-like
s2f_0000023036	-0.71402	1.1375	-2.0913	0.062701	0.52256	-4.4914	BTR33	e3 ubiquitin-protein ligase trim39-like
s2f_0019834001	0.714	2.0561	2.1253	0.059204	0.51172	-4.4387	PRR15	proline-rich protein 15-like
s2f_0002495005	-0.71398	3.1553	-0.98023	0.34986	0.78273	-5.9363	MAP1A	microtubule-associated protein 1a
s2f_0005081005	-0.71379	0.37523	-1.3793	0.19756	0.72942	-5.4961	CALN1	calcium-binding protein 8-like
s2f_0000220004	0.71308	2.0276	4.2703	0.0015978	0.093296	-0.95202	MX1	interferon-induced gtp-binding protein mx-like
s2f_0000147028	0.71305	-0.3886	0.86399	0.40763	0.80463	-6.0419	WNT10A	protein wnt-10a
s2f_0018388001	-0.71293	-0.94346	-1.1889	0.26166	0.75963	-5.72	ADM5	putative adrenomedullin-5-like protein
s2f_0006015001	0.71289	4.5116	3.7954	0.0034469	0.14433	-1.7065	MYH1	myosin heavy chain, muscle-like
s2f_0000583011	0.71288	4.4698	3.6276	0.0045524	0.16429	-1.9791	F13A1	coagulation factor xiii a chain
s2f_0004004002	-0.7124	4.454	-1.3919	0.19383	0.72831	-5.4804	RAB11FIP3	rab11 family-interacting protein 3 isoform x1
s2f_0000645004	-0.71233	-0.054026	-1.5048	0.16296	0.69898	-5.3362	GRAMD2B	gram domain-containing protein 2b isoform x1
s2f_0000300001	-0.71217	2.8888	-3.1177	0.010784	0.24314	-2.8204	MPV17L	mpv17-like protein
s2f_0009946002	-0.71216	4.6946	-3.4406	0.0062299	0.18775	-2.2859	SI:CH211-153B23.4	uncharacterized protein si:ch211-153b23.4
s2f_0000680011	-0.71208	0.14789	-1.2812	0.22875	0.74642	-5.6144	ZBTB43	zinc finger and btb domain-containing protein 43
s2f_0041592001	-0.71208	-2.1382	-0.93911	0.36958	0.79276	-5.9749	s2f_0041592001	uncharacterized loc108268660
s2f_0010542001	0.71189	2.5488	2.478	0.032425	0.40906	-3.8767	BRICD5	brichos domain-containing protein 5
s2f_0016695001	-0.71054	-2.8255	-0.52593	0.61029	0.88105	-6.2811	PRCD	progressive rod-cone degeneration protein
s2f_0006882001	0.71035	8.9589	3.2554	0.0085263	0.21712	-2.592	EPCAM	epithelial cell adhesion molecule
s2f_0005703004	-0.71016	2.0744	-2.3338	0.041527	0.451	-4.1094	AR	androgen receptor-like
s2f_0001498001	-0.71005	6.2874	-2.0344	0.069001	0.5347	-4.579	TKT	transketolase
s2f_0006164001	-0.70955	2.3765	-2.0776	0.064171	0.52354	-4.5127	MLSL	malate synthase
s2f_0017069001	-0.70948	0.4426	-1.7495	0.11046	0.63483	-5.001	CG42372	mief1 upstream open reading frame protein
s2f_0000031018	0.70904	-0.32049	1.4612	0.17434	0.70951	-5.3928	FOXL2L	forkhead box protein l2-like
s2f_0000033026	-0.70897	2.0225	-1.7835	0.10452	0.62413	-4.9522	CDK14	cyclin-dependent kinase 14 isoform x1
s2f_0000319012	-0.70876	5.6395	-3.7353	0.0038066	0.14896	-1.8038	ACSL5	long-chain-fatty-acid--coa ligase 5
s2f_0005546003	-0.70746	2.825	-3.3784	0.0069192	0.1974	-2.3884	STC1	stanniocalcin-like
s2f_0020127001	-0.70738	2.0633	-2.3226	0.042329	0.45228	-4.1273	SI:CH211-199G17.2	uncharacterized protein si:ch211-199g17.2 isoform x1
s2f_0018186001	0.70725	-1.1437	0.80094	0.44159	0.82015	-6.0944	SI:CH211-130H14.4	uncharacterized protein si:ch211-130h14.4 isoform x1
s2f_0000418002	-0.70705	0.72785	-2.1047	0.061301	0.51976	-4.4707	OPN7A	opsin-5-like
s2f_0004805001	-0.70691	2.5303	-1.6367	0.13242	0.66024	-5.1591	SI:CH211-168D23.3	glioma tumor suppressor candidate region gene 1 protein-like
s2f_0008316003	-0.70661	5.6155	-1.3022	0.22174	0.74118	-5.5896	BSNB	protein bassoon-like
s2f_0006201001	0.70609	3.9672	3.2778	0.0082074	0.21407	-2.5549	TMEM54A	keratinocyte-associated protein 3-like
s2f_0010983001	0.70556	0.53527	2.4598	0.033459	0.41403	-3.9063	CUNH8ORF74	uncharacterized protein c8orf74 homolog
s2f_0001263005	-0.70541	2.7894	-1.14	0.2806	0.76527	-5.7737	SVOP	synaptic vesicle 2-related protein
s2f_0005143002	-0.70518	2.8687	-1.6217	0.13561	0.66367	-5.1797	NUMBL	numb-like protein isoform x1
s2f_0000149029	-0.70517	4.6547	-4.0655	0.002218	0.11015	-1.2739	OTOL1	inner ear-specific collagen-like
s2f_0008262001	-0.70499	-0.12872	-1.3898	0.19443	0.72845	-5.483	CUNH1ORF194	uncharacterized protein c1orf194 homolog
s2f_0004317001	-0.70484	4.0105	-3.4473	0.0061599	0.18715	-2.2749	FDFT1	squalene synthase isoform x1
s2f_0004848001	-0.70463	1.5081	-0.84924	0.41541	0.80896	-6.0545	RAP1GDS1	rap1 gtpase-gdp dissociation stimulator 1 isoform x1
s2f_0002666001	-0.70452	3.4588	-1.4369	0.18097	0.71735	-5.4238	SI:CH211-180F4.1	leucine-rich repeat neuronal protein 1-like
s2f_0000084028	0.70444	1.0149	2.0333	0.069128	0.5347	-4.5807	ATOH1C	protein atonal homolog 1-like
s2f_0008944002	0.70381	5.4205	4.2308	0.0017013	0.096695	-1.0136	ILDR1B	immunoglobulin-like domain-containing receptor 1
s2f_0002106001	-0.70378	5.9301	-4.5096	0.001097	0.074874	-0.58312	CNDP2	cytosolic non-specific dipeptidase
[truncated: 13,050 more rows]

## Sheet: DEA-OBS30-K
EntrezID	logFC	AveExpr	t	P.Value	adj.P.Val	B	Symbols	Name
[truncated: 18,023 more rows]

## Sheet: DEA-OBS30-S
EntrezID	logFC	AveExpr	t	P.Value	adj.P.Val	B	Symbols	Name
[truncated: 14,948 more rows]

[truncated: 8 more sheets: DEA-PFOS-K, DEA-PFOS-S, KEGG-OBS20-K, KEGG-OBS20-S, KEGG-OBS30-K, KEGG-OBS30-S, KEGG-PFOS-K, KEGG-PFOS-S]
